# Supplementary material for: Nageotte nodules in human DRG reveal neurodegeneration in painful diabetic neuropathy
Source: bioRxiv preprint, doi:10.1101/2024.08.22.609215, version 1 (2024-08-23)
Supplement: Supplemental Table 2 [file 609215_file08.xlsx]

## Sheet: GO_Biological_Process_2023_tabl
Term	Overlap	P-value	Adjusted P-value	Odds Ratio	Combined Score	Genes
Energy Derivation By Oxidation Of Organic Compounds (GO:0015980)	13/43	3.66892e-14	7.61301e-11	29.6992	918.783	UQCRB;NDUFA4;COX4I1;COX7A2;UQCR11;UQCR10;COX5B;COX6A1;COX6C;COX7C;MT3;COX6B1;UQCRQ
Aerobic Electron Transport Chain (GO:0019646)	14/68	1.28489e-12	1.12144e-09	17.8091	487.62	UQCRB;NDUFA4;COX4I1;NDUFA1;COX7A2;UQCR11;UQCR10;COX6A1;COX5B;COX6C;COX7C;COX6B1;UQCRQ;NDUFS5
Mitochondrial ATP Synthesis Coupled Electron Transport (GO:0042775)	14/70	1.96154e-12	1.12144e-09	17.1713	462.892	UQCRB;NDUFA4;COX4I1;NDUFA1;COX7A2;UQCR11;UQCR10;COX6A1;COX5B;COX6C;COX7C;COX6B1;UQCRQ;NDUFS5
Cellular Respiration (GO:0045333)	15/85	2.16181e-12	1.12144e-09	14.7594	396.439	NDUFA13;UQCRB;NDUFA4;COX4I1;NDUFA1;COX7A2;UQCR11;UQCR10;COX6A1;COX5B;COX6C;COX7C;COX6B1;UQCRQ;NDUFS5
Glycolytic Process (GO:0006096)	10/29	7.72873e-12	3.20742e-09	35.7187	913.901	GPI;LDHA;TPI1;PKM;PGAM1;PGK1;ALDOC;ENO1;ENO2;GAPDH
Mitochondrial Electron Transport, Cytochrome C To Oxygen (GO:0006123)	8/16	2.70728e-11	9.36268e-09	67.4384	1640.94	NDUFA4;COX4I1;COX7A2;COX5B;COX6A1;COX6C;COX7C;COX6B1
Carbohydrate Catabolic Process (GO:0016052)	10/41	3.69008e-10	1.09385e-07	21.8788	475.211	GPI;LDHA;TPI1;PKM;PGAM1;PGK1;ALDOC;ENO1;ENO2;GAPDH
Pyruvate Metabolic Process (GO:0006090)	10/50	3.00132e-09	7.78467e-07	16.9483	332.597	GPI;LDHA;TPI1;PKM;PGAM1;PGK1;ALDOC;ENO1;ENO2;GAPDH
Substantia Nigra Development (GO:0021762)	9/42	9.84977e-09	2.27092e-06	18.4321	339.81	PLP1;CALM3;NDRG2;DYNLL1;CALM1;CALM2;RHOA;YWHAH;COX6B1
Regulation Of Apoptotic Process (GO:0042981)	32/705	2.75195e-08	5.71031e-06	3.37575	58.7663	GSTP1;HTRA1;HSPB1;CLU;ACTB;RTN4;HSP90B1;PRDX2;PRDX5;LGALS1;UBB;ARHGDIA;CFL1;RACK1;CTSD;CTSB;CD74;HSP90AA1;ANXA5;NME2;DHCR24;MT3;YWHAZ;SOD1;MORF4L1;CALR;CRYAB;PTMA;PPIA;SQSTM1;CD44;TPT1
Negative Regulation Of Amyloid-Beta Formation (GO:1902430)	6/16	7.6465e-08	1.44241e-05	40.1837	658.467	PRNP;RTN3;RTN1;APOE;CLU;RTN4
Negative Regulation Of Amyloid Precursor Protein Catabolic Process (GO:1902992)	6/18	1.72832e-07	2.98856e-05	33.483	521.362	PRNP;RTN3;RTN1;APOE;CLU;RTN4
Humoral Immune Response Mediated By Circulating Immunoglobulin (GO:0002455)	4/5	2.45202e-07	3.9138e-05	266.203	4051.92	C1QB;C1R;CD81;C1QC
Axon Development (GO:0061564)	11/99	2.81466e-07	4.17172e-05	8.4827	127.947	APP;GAP43;APLP2;MAP1B;MAP1A;S100A6;PLP1;S100B;NEFH;RTN4;GPM6B
Antigen Processing And Presentation Of Exogenous Peptide Antigen (GO:0002478)	7/31	3.07642e-07	4.25572e-05	19.5865	293.686	HLA-DRB5;HLA-DRA;HLA-A;CTSD;HLA-DRB1;HLA-DPA1;HLA-E
Antigen Processing And Presentation Of Endogenous Peptide Antigen (GO:0002483)	6/21	4.86401e-07	6.30802e-05	26.7823	389.314	HLA-B;HLA-C;HLA-DRA;HLA-A;HLA-DRB1;HLA-E
Response To Reactive Oxygen Species (GO:0000302)	9/66	5.96658e-07	7.28274e-05	10.6582	152.752	PRDX5;GSTP1;APOD;FOS;APOE;SQSTM1;MT3;MAPK3;SOD1
Positive Regulation Of Protein Modification Process (GO:0031401)	15/225	1.66824e-06	0.000192311	4.88471	64.9849	APP;CD74;HSP90AA1;RARRES2;TXN;DYNLL1;MT3;C3;RACK1;CALM3;CALM1;CALM2;PPIA;HLA-DRB1;MAPK3
Negative Regulation Of Peptidase Activity (GO:0010466)	8/60	3.03577e-06	0.000331538	10.3519	131.522	CST3;SERPINA3;TIMP2;TIMP3;SERPING1;TIMP1;GAPDH;CTSB
Positive Regulation Of Leukocyte Cell-Cell Adhesion (GO:1903039)	7/44	3.79414e-06	0.000386232	12.6963	158.476	HLA-DRB5;HLA-DRA;THY1;RHOA;CD44;HLA-DRB1;HLA-DPA1
Regulation Of T Cell Activation (GO:0050863)	8/62	3.90885e-06	0.000386232	9.96753	124.118	LGALS3;HLA-DRB5;LAPTM5;HLA-DRA;THY1;B2M;HLA-DRB1;HLA-DPA1
Immunoglobulin Mediated Immune Response (GO:0016064)	6/30	4.7507e-06	0.000448077	16.7313	205.079	CD74;HLA-DRB5;CD81;HLA-DRA;HLA-DRB1;HLA-DPA1
Homotypic Cell-Cell Adhesion (GO:0034109)	7/46	5.16534e-06	0.000449405	12.044	146.618	CSRP1;GNAS;HSPB1;MYL9;PPIA;CD99;ACTG1
Peptide Antigen Assembly With MHC Protein Complex (GO:0002501)	5/18	5.36119e-06	0.000449405	25.6675	311.51	HLA-DRB5;HLA-DRA;CALR;HLA-DRB1;HLA-DPA1
Negative Regulation Of Programmed Cell Death (GO:0043069)	19/381	5.41451e-06	0.000449405	3.61202	43.8009	CD74;GPX4;GSTP1;ANXA5;NME2;LAPTM5;HSPB1;DHCR24;MT3;YWHAZ;HSP90B1;PRDX2;PRDX5;ARHGDIA;CFL1;CRYAB;PTMA;CD44;TPT1
Intracellular Monoatomic Cation Homeostasis (GO:0030003)	13/190	6.22941e-06	0.0004845	4.99614	59.8849	APP;PRNP;NDFIP1;ATP1A1;ATP1B1;MT3;SOD1;MT2A;FTH1;CALR;B2M;TPT1;FTL
Negative Regulation Of Endopeptidase Activity (GO:0010951)	8/66	6.30434e-06	0.0004845	9.27822	111.1	CST3;SERPINA3;TIMP2;TIMP3;SERPING1;TIMP1;GAPDH;MT3
Gluconeogenesis (GO:0006094)	6/32	7.06973e-06	0.000523918	15.4427	183.146	GPI;TPI1;PGAM1;PGK1;ENO1;ENO2
Positive Regulation Of T Cell Mediated Cytotoxicity (GO:0001916)	6/33	8.53255e-06	0.00057113	14.87	173.557	HLA-B;HLA-C;HLA-DRA;HLA-A;HLA-DRB1;HLA-E
Positive Regulation Of Protein Dephosphorylation (GO:0035307)	6/33	8.53255e-06	0.00057113	14.87	173.557	HSP90AB1;CALM3;DYNLL1;CALM1;CALM2;PPIA
Regulation Of Amyloid-Beta Formation (GO:1902003)	6/33	8.53255e-06	0.00057113	14.87	173.557	RTN3;PRNP;RTN1;APOE;CLU;RTN4
Regulation Of Dendritic Cell Differentiation (GO:2001198)	4/10	9.7042e-06	0.000610189	44.3559	511.997	LGALS3;LGALS1;TMEM176B;HLA-B
Removal Of Superoxide Radicals (GO:0019430)	4/10	9.7042e-06	0.000610189	44.3559	511.997	PRDX2;PRDX1;MT3;SOD1
Negative Regulation Of Amide Metabolic Process (GO:0034249)	9/93	1.08874e-05	0.00064888	7.22239	82.5368	RTN3;PRNP;RTN1;RACK1;APOE;CALR;CLU;GAPDH;RTN4
Negative Regulation Of Supramolecular Fiber Organization (GO:1902904)	8/71	1.0945e-05	0.00064888	8.53968	97.5456	HSPA8;STMN1;STMN2;APOE;PFN1;CLU;CRYAB;PFDN5
Regulation Of I-kappaB kinase/NF-kappaB Signaling (GO:0043122)	14/232	1.16453e-05	0.000665824	4.37461	49.6982	CD74;NDFIP1;GSTP1;HSPB1;RHOC;S100B;RHOA;LGALS1;EEF1D;S100A13;S100A4;SQSTM1;GAPDH;HLA-DRB1
Hexose Biosynthetic Process (GO:0019319)	6/35	1.21934e-05	0.000665824	13.8431	156.629	GPI;TPI1;PGAM1;PGK1;ENO1;ENO2
Platelet Aggregation (GO:0070527)	6/35	1.21934e-05	0.000665824	13.8431	156.629	CSRP1;GNAS;HSPB1;MYL9;PPIA;ACTG1
Negative Regulation Of Apoptotic Process (GO:0043066)	21/482	1.37985e-05	0.000734152	3.14121	35.1531	CD74;GSTP1;ANXA5;NME2;HSPB1;DHCR24;CLU;MT3;YWHAZ;HSP90B1;SOD1;PRDX2;PRDX5;ARHGDIA;CFL1;APOE;CRYAB;PTMA;CD44;TPT1;GRINA
Regulation Of T Cell Mediated Cytotoxicity (GO:0001914)	6/36	1.44489e-05	0.000749538	13.381	149.129	HLA-B;HLA-C;HLA-DRA;HLA-A;HLA-DRB1;HLA-E
Cellular Response To Superoxide (GO:0071451)	4/11	1.50694e-05	0.000758	38.0174	422.101	PRDX2;PRDX1;MT3;SOD1
Regulation Of Focal Adhesion Assembly (GO:0051893)	7/54	1.54263e-05	0.000758	9.98991	110.683	APOD;THY1;DYNLL1;RHOA;GPM6B;ACTG1;S100A10
Positive Regulation Of Intracellular Signal Transduction (GO:1902533)	22/525	1.5708e-05	0.000758	3.02025	33.4081	APP;CD74;HSP90AA1;NDFIP1;HSP90AB1;CD81;LAPTM5;TXN;RHOC;S100B;RHOA;RTN4;DCN;SOD1;LGALS1;EEF1D;S100A13;RACK1;S100A4;PPIA;GAPDH;HLA-DRB1
Regulation Of Stress Fiber Assembly (GO:0051492)	8/75	1.64796e-05	0.000777161	8.02822	88.4179	RGCC;STMN1;DYNLL1;RHOC;PFN1;RHOA;ACTG1;S100A10
Positive Regulation Of Protein Phosphorylation (GO:0001934)	18/377	1.72284e-05	0.000794422	3.43881	37.7201	APP;CD74;PRNP;HSP90AA1;HSP90AB1;CD81;RARRES2;TXN;MT3;C3;RACK1;CALM3;CALM1;CALM2;PPIA;HLA-DRB1;CD44;MAPK3
Mitochondrial Electron Transport, Ubiquinol To Cytochrome C (GO:0006122)	4/12	2.23374e-05	0.00100761	33.2635	356.227	UQCRB;UQCRQ;UQCR11;UQCR10
Central Nervous System Development (GO:0007417)	15/283	2.6423e-05	0.00116655	3.81618	40.2274	APP;C1QA;RTN3;NDRG4;GSN;RTN1;GSTP1;APLP2;S100B;HSPG2;RTN4;C3;MARCKS;APOD;SPTBN1
Regulation Of Protein Dephosphorylation (GO:0035304)	6/40	2.70752e-05	0.00117044	11.8043	124.145	CALM3;DYNLL1;CALM1;CALM2;PPIA;HSP90B1
Glucose Metabolic Process (GO:0006006)	7/59	2.78743e-05	0.00118039	9.02704	94.6739	GPI;TPI1;PGAM1;PGK1;APOD;ENO1;ENO2
Negative Regulation Of Proteolysis (GO:0045861)	6/41	3.13202e-05	0.0012252	11.4665	118.922	CST3;PRNP;TIMP2;TIMP3;TIMP1;CTSB
Antigen Processing And Presentation Of Endogenous Peptide Antigen Via MHC Class I Via ER Pathway (GO:0002484)	4/13	3.18846e-05	0.0012252	29.5661	306.109	HLA-B;HLA-C;HLA-A;HLA-E
Antigen Processing And Presentation Of Endogenous Peptide Antigen Via MHC Class I Via ER Pathway, TAP-independent (GO:0002486)	4/13	3.18846e-05	0.0012252	29.5661	306.109	HLA-B;HLA-C;HLA-A;HLA-E
Antigen Processing And Presentation Of Endogenous Peptide Antigen Via MHC Class Ib (GO:0002476)	4/13	3.18846e-05	0.0012252	29.5661	306.109	HLA-B;HLA-C;HLA-A;HLA-E
Antigen Processing And Presentation Of Peptide Antigen Via MHC Class Ib (GO:0002428)	4/13	3.18846e-05	0.0012252	29.5661	306.109	HLA-B;HLA-C;HLA-A;HLA-E
Positive Regulation Of T Cell Activation (GO:0050870)	9/107	3.38018e-05	0.00127525	6.1862	63.6869	HLA-DRB5;CD81;HLA-DRA;HLA-A;THY1;B2M;ACTB;HLA-DRB1;HLA-DPA1
Translational Elongation (GO:0006414)	6/42	3.60835e-05	0.00133702	11.1474	114.034	EEF1A1;EEF1G;EEF1D;EEF1A2;RACK1;EEF2
Antigen Processing And Presentation Of Exogenous Peptide Antigen Via MHC Class II (GO:0019886)	5/26	3.7302e-05	0.00135792	15.883	161.95	HLA-DRB5;HLA-DRA;CTSD;HLA-DRB1;HLA-DPA1
Regulation Of Programmed Cell Death (GO:0043067)	12/195	4.05462e-05	0.00143213	4.44376	44.9401	PRDX2;MORF4L1;HSP90AA1;LGALS1;NME2;CALR;CRYAB;CLU;ACTB;RTN4;TPT1;CTSB
Cellular Component Assembly (GO:0022607)	14/260	4.12607e-05	0.00143213	3.87111	39.0812	CD74;RTN3;GSN;RTN1;YWHAZ;RHOA;RTN4;VMP1;PPP2R1A;ELOB;NEFH;GPM6B;SPTBN1;AP2M1
Positive Regulation Of T Cell Mediated Immunity (GO:0002711)	6/43	4.14109e-05	0.00143213	10.8456	109.453	HLA-B;HLA-C;HLA-DRA;HLA-A;HLA-DRB1;HLA-E
Oxidative Phosphorylation (GO:0006119)	7/63	4.29527e-05	0.0014529	8.38055	84.2698	NDUFA13;ATP5F1B;UQCRB;NDUFS5;NDUFA1;ATP5F1E;ATP5ME
MHC Class II Protein Complex Assembly (GO:0002399)	4/14	4.41122e-05	0.0014529	26.6081	266.847	HLA-DRB5;HLA-DRA;HLA-DRB1;HLA-DPA1
Peptide Antigen Assembly With MHC Class II Protein Complex (GO:0002503)	4/14	4.41122e-05	0.0014529	26.6081	266.847	HLA-DRB5;HLA-DRA;HLA-DRB1;HLA-DPA1
Positive Regulation Of Calcium Ion Transmembrane Transporter Activity (GO:1901021)	5/27	4.52208e-05	0.00146614	15.1602	151.662	VMP1;CALM3;ATP1B1;CALM1;CALM2
Regulation Of Viral Entry Into Host Cell (GO:0046596)	6/44	4.73504e-05	0.00151157	10.5596	105.152	IFITM3;CD74;IFITM2;LGALS1;GSN;HLA-DRB1
Positive Regulation Of Cellular Component Organization (GO:0051130)	9/113	5.20447e-05	0.00163626	5.82752	57.4792	LGALS3;CD151;ANXA2;AHNAK;RACK1;APOE;RHOC;CLU;S100A10
Antigen Processing And Presentation Of Peptide Antigen Via MHC Class II (GO:0002495)	5/28	5.43795e-05	0.00168414	14.5004	142.387	HLA-DRB5;HLA-DRA;CTSD;HLA-DRB1;HLA-DPA1
Retrograde Axonal Transport (GO:0008090)	4/15	5.94441e-05	0.00176209	24.188	235.36	DYNC1H1;MAP1A;NEFL;SOD1
Epiboly Involved In Wound Healing (GO:0090505)	4/15	5.94441e-05	0.00176209	24.188	235.36	CD151;RHOC;RHOA;CD44
Regulation Of Amyloid Fibril Formation (GO:1905906)	4/15	5.94441e-05	0.00176209	24.188	235.36	APP;CLU;CRYAB;PFDN5
Negative Regulation Of Membrane Protein Ectodomain Proteolysis (GO:0051045)	3/6	6.46264e-05	0.00187058	66.3199	639.78	TIMP2;TIMP3;TIMP1
Positive Regulation Of Dephosphorylation (GO:0035306)	5/29	6.49068e-05	0.00187058	13.8955	133.988	CALM3;DYNLL1;CALM1;CALM2;PPIA
Positive Regulation Of I-kappaB kinase/NF-kappaB Signaling (GO:0043123)	11/175	6.99666e-05	0.00198878	4.53405	43.3795	CD74;LGALS1;NDFIP1;EEF1D;S100A13;S100A4;RHOC;S100B;GAPDH;HLA-DRB1;RHOA
Protein Stabilization (GO:0050821)	12/208	7.5679e-05	0.00210949	4.14626	39.3439	GPI;HSP90AA1;HSP90AB1;CALR;PFN1;ATP1B1;CRYAB;CLU;MT3;GAPDH;PFDN5;RTN4
Negative Regulation Of Protein Metabolic Process (GO:0051248)	10/147	7.72279e-05	0.00210949	4.92399	46.624	CST3;PRNP;HSP90AB1;RACK1;APOE;CALR;CLU;CRYAB;GAPDH;PFDN5
Regulation Of Protein-Containing Complex Assembly (GO:0043254)	9/119	7.79754e-05	0.00210949	5.50797	52.1005	LGALS3;HSPA8;HSP90AA1;GSN;RACK1;APOE;RHOC;CLU;CRYAB
Myelination (GO:0042552)	6/48	7.82798e-05	0.00210949	9.55199	90.3162	LGI4;GPC1;MPZ;PLP1;PMP22;GPM6B
Negative Regulation Of Protein Phosphorylation (GO:0001933)	10/149	8.64828e-05	0.00230066	4.85264	45.3992	PRNP;GSTP1;RACK1;HSPB1;CALM3;THY1;CALM1;PPIA;CALM2;YWHAG
Proton Transmembrane Transport (GO:1902600)	6/49	8.80895e-05	0.00231374	9.32938	87.1099	ATP6V0B;RNASEK;ATP5F1B;ATP1A1;ATP1B1;ATP6V0C
Supramolecular Fiber Organization (GO:0097435)	15/316	9.25e-05	0.00239922	3.39203	31.5062	APP;DYNC1H1;GSN;HSP90AB1;STMN2;RHOA;CNN3;CST3;MARCKS;STMN1;NEFL;TAGLN2;VIM;B2M;MYL9
Receptor-Mediated Endocytosis (GO:0006898)	9/122	9.45557e-05	0.00242226	5.36092	49.676	RNASEK;CD81;CLTC;STAB1;CANX;CD9;APOE;HSPG2;AP2M1
Neuron Maturation (GO:0042551)	4/17	0.000101219	0.00256134	20.4647	188.238	C3;APP;C1QA;LGI4
Positive Regulation Of Leukocyte Mediated Cytotoxicity (GO:0001912)	6/51	0.000110636	0.00269846	8.91383	81.1984	HLA-B;HLA-C;HLA-DRA;HLA-A;HLA-DRB1;HLA-E
Regulation Of Cyclic-Nucleotide Phosphodiesterase Activity (GO:0051342)	3/7	0.00011184	0.00269846	49.7374	452.533	RACK1;CALM3;CALM2
Intermediate Filament Bundle Assembly (GO:0045110)	3/7	0.00011184	0.00269846	49.7374	452.533	NEFL;NEFM;NEFH
Positive Regulation Of Ryanodine-Sensitive Calcium-Release Channel Activity (GO:0060316)	3/7	0.00011184	0.00269846	49.7374	452.533	CALM3;CALM1;CALM2
Response To Cytokine (GO:0034097)	9/125	0.000113997	0.00271889	5.22147	47.4075	IFITM3;APP;CD74;IFITM2;TIMP2;TIMP3;TIMP1;RHOA;TLE5
Negative Regulation Of T Cell Receptor Signaling Pathway (GO:0050860)	4/18	0.000128607	0.00299843	19.0019	170.233	PRNP;LGALS3;LAPTM5;THY1
Positive Regulation Of Phosphoprotein Phosphatase Activity (GO:0032516)	4/18	0.000128607	0.00299843	19.0019	170.233	HSP90AB1;CALM3;CALM1;CALM2
Axonogenesis (GO:0007409)	11/188	0.000132602	0.00305722	4.19825	37.4826	APP;HSP90AA1;HSP90AB1;TUBB3;APLP2;MAP1B;MAP1A;SEMA3B;S100A6;S100B;NEFH
Proton Motive Force-Driven Mitochondrial ATP Synthesis (GO:0042776)	6/53	0.000137539	0.00313618	8.53365	75.8779	NDUFA13;ATP5F1B;NDUFS5;NDUFA1;ATP5F1E;ATP5ME
Regulation Of T Cell Receptor Signaling Pathway (GO:0050856)	5/34	0.000143038	0.00322612	11.4968	101.774	LGALS3;PRNP;CD81;LAPTM5;THY1
Negative Regulation Of Protein Catabolic Process (GO:0042177)	6/54	0.000152803	0.00337304	8.35544	73.4139	CST3;HSP90AB1;ANXA2;TIMP2;TIMP3;TIMP1
Regulation Of Blood Vessel Endothelial Cell Migration (GO:0043535)	6/54	0.000152803	0.00337304	8.35544	73.4139	ATP5F1A;ATP5F1B;RGCC;TMSB4X;HSPB1;APOE
Cell Morphogenesis Involved In Neuron Differentiation (GO:0048667)	7/77	0.000156152	0.00337515	6.69966	58.7204	APP;APLP2;MAP1B;MAP1A;S100A6;S100B;NEFH
Negative Regulation Of Blood Vessel Morphogenesis (GO:2000181)	7/77	0.000156152	0.00337515	6.69966	58.7204	SPARC;RGCC;STAB1;PGK1;HSPG2;DCN;GTF2I
Immunoglobulin Production Involved In Immunoglobulin-Mediated Immune Response (GO:0002381)	4/19	0.000160987	0.00340864	17.7342	154.894	HLA-DRB5;HLA-DRA;HLA-DRB1;HLA-DPA1
Positive Regulation Of Alpha-Beta T Cell Activation (GO:0046635)	4/19	0.000160987	0.00340864	17.7342	154.894	HLA-DRA;HLA-A;HLA-DRB1;HLA-E
Synapse Pruning (GO:0098883)	3/8	0.000176957	0.00370894	39.7879	343.752	C1QB;C3;C1QC
Apoptotic Process (GO:0006915)	12/228	0.000179851	0.00373191	3.75849	32.4109	APP;NGFR;IFI27;PPP2R1A;PRUNE2;PMP22;DHCR24;CD14;DYNLL1;PPIA;GAPDH;RTN4
Negative Regulation Of Cellular Process (GO:0048523)	20/537	0.000190104	0.00389292	2.65032	22.7078	APP;NDUFA13;APLP2;ENO1;DYNLL1;CLU;MT3;ACTB;RTN4;FABP3;RGCC;PPP2R1A;FTH1;FABP7;RACK1;ANXA6;TXNIP;IGFBP7;CRYAB;S100A11
Regulation Of Protein Phosphorylation (GO:0001932)	13/265	0.000195738	0.00389292	3.49571	29.849	APP;CD74;PRNP;HSP90AA1;RARRES2;HSPB1;MT3;SOD1;C3;RACK1;PPIA;HLA-DRB1;MAPK3
Hydrogen Peroxide Catabolic Process (GO:0042744)	4/20	0.000198867	0.00389292	16.625	141.693	PRDX2;PRDX5;GPX3;PRDX1
Negative Regulation Of Viral Life Cycle (GO:1903901)	4/20	0.000198867	0.00389292	16.625	141.693	IFITM3;GSN;IFITM2;PPIA
Positive Regulation Of Protein Processing (GO:0010954)	4/20	0.000198867	0.00389292	16.625	141.693	GSN;ANXA2;ENO1;S100A10
Regulation Of Cardiac Muscle Contraction By Calcium Ion Signaling (GO:0010882)	4/20	0.000198867	0.00389292	16.625	141.693	CALM3;ATP1B1;CALM1;CALM2
Cellular Response To Metal Ion (GO:0071248)	9/135	0.000204587	0.00396746	4.80461	40.8129	PRNP;MT2A;CLIC4;SYT11;FOS;CLU;B2M;MT3;MAPK3
Regulation Of Phosphoprotein Phosphatase Activity (GO:0043666)	5/37	0.00021599	0.00411173	10.4174	87.9255	HSP90AB1;CALM3;CALM1;CALM2;HSP90B1
Negative Regulation Of Endothelial Cell Proliferation (GO:0001937)	5/37	0.00021599	0.00411173	10.4174	87.9255	NGFR;ATP5F1A;SPARC;RGCC;APOE
Regulation Of Neuron Death (GO:1901214)	6/58	0.000227759	0.00429636	7.71115	64.6751	C1QA;PRNP;UBB;SNCG;DHCR24;CLU
Regulation Of Membrane Protein Ectodomain Proteolysis (GO:0051043)	4/21	0.000242772	0.00453831	15.6463	130.23	TIMP2;TIMP3;APOE;TIMP1
Golgi Lumen Acidification (GO:0061795)	3/9	0.00026249	0.00473622	33.1549	273.372	ATP6V0B;RNASEK;ATP6V0C
Regulation Of Tau-Protein Kinase Activity (GO:1902947)	3/9	0.00026249	0.00473622	33.1549	273.372	HSP90AA1;HSP90AB1;CLU
Myelin Assembly (GO:0032288)	3/9	0.00026249	0.00473622	33.1549	273.372	GPC1;PMP22;CD9
Neuron Remodeling (GO:0016322)	3/9	0.00026249	0.00473622	33.1549	273.372	C3;APP;C1QA
Positive Regulation Of Multicellular Organismal Process (GO:0051240)	16/387	0.000265555	0.00475024	2.9352	24.1675	DYNC1H1;APLP2;NME2;ENO1;ACTB;RTN4;SOD1;BSCL2;RGCC;SCD;CFL1;S100A13;SPP1;GNAS;APOE;GAPDH
Regulation Of MAPK Cascade (GO:0043408)	11/204	0.000270108	0.00479038	3.84705	31.61	CD74;PPP2R1A;CD81;GSTP1;LAPTM5;PEBP1;PPIA;YWHAZ;HLA-DRB1;MAPK3;SOD1
Proton Motive Force-Driven ATP Synthesis (GO:0015986)	6/60	0.000274747	0.00483135	7.42479	60.8808	NDUFA13;ATP5F1B;NDUFS5;NDUFA1;ATP5F1E;ATP5ME
Retina Homeostasis (GO:0001895)	5/39	0.000278394	0.00485434	9.80359	80.2568	PRDX1;HSPB1;B2M;ACTG1;SOD1
Positive Regulation Of Endothelial Cell Migration (GO:0010595)	7/85	0.000289461	0.00500527	6.01006	48.9669	GPI;ATP5F1A;SPARC;ATP5F1B;TMSB4X;HSPB1;CALR
Positive Regulation Of Phosphatase Activity (GO:0010922)	4/22	0.000293236	0.00502864	14.7763	120.198	HSP90AB1;CALM3;CALM1;CALM2
Regulation Of Autophagy (GO:0010506)	12/241	0.000299379	0.00507665	3.54276	28.7452	EEF1A1;UCHL1;ATP6V0B;CAPNS1;EEF1A2;PSAP;HSPB1;ATP6V0C;SQSTM1;GAPDH;EIF4G2;DCN
Negative Regulation Of Intrinsic Apoptotic Signaling Pathway (GO:2001243)	6/61	0.000300929	0.00507665	7.28942	59.1073	NDUFA13;HSPB1;ENO1;CLU;PPIA;TPT1
Negative Regulation Of Angiogenesis (GO:0016525)	7/86	0.000311127	0.00520635	5.93368	47.9163	SPARC;RGCC;STAB1;PGK1;HSPG2;DCN;GTF2I
Positive Regulation Of Hydrolase Activity (GO:0051345)	10/176	0.000336902	0.00559257	4.05775	32.4446	NDUFA13;PSAP;RACK1;CALM3;THY1;CALM1;RHOC;CALM2;RHOA;S100A10
Positive Regulation Of Protein Kinase Activity (GO:0045860)	9/145	0.000348392	0.00573162	4.44906	35.4242	PRNP;CALCA;HSP90AA1;HSP90AB1;CALM3;CALM1;CLU;CALM2;RHOA
Negative Regulation Of Actin Filament Polymerization (GO:0030837)	4/23	0.000350803	0.00573162	13.9979	111.357	GSN;TMSB4X;PFN1;TMSB10
Neuron Projection Maintenance (GO:1990535)	3/10	0.000370827	0.00601145	28.417	224.488	APP;PRNP;MAP1A
Cellular Response To Oxidative Stress (GO:0034599)	8/117	0.000387326	0.00623024	4.92422	38.6859	PRDX2;CHCHD2;PRDX5;FOS;PPIA;SQSTM1;MT3;MAPK3
Regulation Of Supramolecular Fiber Organization (GO:1902903)	4/24	0.000416023	0.00658968	13.2973	103.516	HSPA8;MAP1B;MAP1A;APOE
Negative Regulation Of Antigen Receptor-Mediated Signaling Pathway (GO:0050858)	4/24	0.000416023	0.00658968	13.2973	103.516	PRNP;LGALS3;LAPTM5;THY1
Positive Regulation Of Receptor-Mediated Endocytosis (GO:0048260)	5/43	0.00044323	0.00696744	8.76985	67.7157	C3;CD63;ANXA2;CLU;B2M
Cellular Response To Oxygen-Containing Compound (GO:1901701)	16/406	0.000450099	0.00702223	2.78945	21.4957	CLIC4;NDUFA13;GSTP1;FOS;CLU;MT3;ACTB;RHOA;HSP90B1;PRDX5;SYT11;GNB1;CD14;VIM;SQSTM1;MAPK3
ATP Biosynthetic Process (GO:0006754)	4/25	0.000489456	0.00742051	12.6634	96.5235	ATP5F1A;ATP5F1B;ATP5F1E;ATP5ME
Wound Healing, Spreading Of Cells (GO:0044319)	4/25	0.000489456	0.00742051	12.6634	96.5235	CD151;RHOC;RHOA;CD44
Negative Regulation Of Intrinsic Apoptotic Signaling Pathway In Response To DNA Damage (GO:1902230)	4/25	0.000489456	0.00742051	12.6634	96.5235	CD74;CLU;CD44;TPT1
Central Nervous System Myelination (GO:0022010)	3/11	0.000504237	0.00742051	24.8636	188.776	PLP1;CLU;GPM6B
Endosomal Lumen Acidification (GO:0048388)	3/11	0.000504237	0.00742051	24.8636	188.776	ATP6V0B;RNASEK;ATP6V0C
Intracellular Copper Ion Homeostasis (GO:0006878)	3/11	0.000504237	0.00742051	24.8636	188.776	APP;PRNP;MT2A
Negative Regulation Of Amyloid Fibril Formation (GO:1905907)	3/11	0.000504237	0.00742051	24.8636	188.776	CLU;CRYAB;PFDN5
Negative Regulation Of Nitrogen Compound Metabolic Process (GO:0051172)	3/11	0.000504237	0.00742051	24.8636	188.776	HSP90AB1;CLTC;APOE
Regulation Of Endopeptidase Activity (GO:0052548)	6/69	0.00058786	0.00859021	6.36119	47.321	SERPINA3;TIMP2;TIMP3;SERPING1;TIMP1;GAPDH
Regulation Of Microtubule Polymerization Or Depolymerization (GO:0031110)	4/27	0.000663223	0.00932167	11.5611	84.6088	MAP1B;STMN1;MAP1A;STMN2
Detection Of Bacterium (GO:0016045)	3/12	0.000664871	0.00932167	22.0999	161.681	HLA-B;HLA-A;HLA-DRB1
Positive Regulation By Symbiont Of Entry Into Host (GO:0075294)	3/12	0.000664871	0.00932167	22.0999	161.681	CD74;LGALS1;HLA-DRB1
Positive Regulation Of CD4-positive, Alpha-Beta T Cell Activation (GO:2000516)	3/12	0.000664871	0.00932167	22.0999	161.681	CD81;HLA-DRA;HLA-DRB1
Positive Regulation Of Viral Entry Into Host Cell (GO:0046598)	3/12	0.000664871	0.00932167	22.0999	161.681	CD74;LGALS1;HLA-DRB1
Regulation Of Cell Communication By Electrical Coupling (GO:0010649)	3/12	0.000664871	0.00932167	22.0999	161.681	CALM3;CALM1;CALM2
Positive Regulation Of Lymphocyte Activation (GO:0051251)	5/47	0.000672646	0.00936738	7.93301	57.945	HLA-DRB5;HLA-DRA;THY1;HLA-DRB1;HLA-DPA1
Regulation Of Signal Transduction (GO:0009966)	10/193	0.000694361	0.00960533	3.6776	26.7454	APP;CD63;PRNP;PPP2R1A;IGFBP4;IGFBP7;TIMP1;CLU;PPIA;YWHAG
Cell-Substrate Junction Assembly (GO:0007044)	4/28	0.000764697	0.0105083	11.0788	79.502	ITGB4;THY1;DYNLL1;PLEC
Cellular Response To Reactive Oxygen Species (GO:0034614)	6/73	0.000794129	0.0108409	5.9802	42.6883	PRDX5;FOS;CLU;SQSTM1;MT3;MAPK3
Regulation Of Immune Effector Process (GO:0002697)	3/13	0.000854768	0.0115924	19.8889	140.509	HLA-DRA;CD59;HLA-DRB1
Protein Catabolic Process (GO:0030163)	7/102	0.000872702	0.011736	4.9303	34.7286	HSPA8;HSP90AA1;FBXO2;APOE;SQSTM1;CTSD;CTSB
Response To Interferon-Beta (GO:0035456)	4/29	0.000876664	0.011736	10.6351	74.8648	IFITM3;NDUFA13;IFITM2;CALM1
Intracellular Iron Ion Homeostasis (GO:0006879)	5/50	0.000895727	0.0117635	7.40301	51.9534	NDFIP1;FTH1;B2M;FTL;SOD1
Negative Regulation Of Cell Projection Organization (GO:0031345)	5/50	0.000895727	0.0117635	7.40301	51.9534	PRNP;STMN2;APOE;MT3;YWHAH
Positive Regulation Of Transport (GO:0051050)	5/50	0.000895727	0.0117635	7.40301	51.9534	DYNC1H1;CD151;ANXA2;APOE;ACTB
Positive Regulation Of Actin Filament Bundle Assembly (GO:0032233)	5/51	0.000981063	0.0127667	7.24171	50.1624	RGCC;RHOC;PFN1;RHOA;S100A10
Regulation Of Translation (GO:0006417)	10/202	0.000984423	0.0127667	3.50359	24.257	APP;CIRBP;RACK1;HSPB1;CALR;VIM;EEF2;GAPDH;EIF4G2;EIF1
Negative Regulation Of MAPK Cascade (GO:0043409)	7/105	0.00103549	0.0133456	4.77864	32.843	UCHL1;PPP2R1A;GSTP1;PEBP1;TIMP3;APOE;PPIA
Copper Ion Homeostasis (GO:0055070)	3/14	0.00107586	0.0136957	18.0799	123.569	APP;PRNP;MT2A
Negative Regulation Of Peptidyl-Threonine Phosphorylation (GO:0010801)	3/14	0.00107586	0.0136957	18.0799	123.569	CALM3;CALM1;CALM2
Positive Regulation Of Cytokine Production (GO:0001819)	13/320	0.00115444	0.0146065	2.86133	19.3544	APP;CD74;LAPTM5;HLA-A;HLA-E;SOD1;C3;RGCC;S100A13;CD14;GAPDH;SPTBN1;HLA-DPA1
Regulation Of ERK1 And ERK2 Cascade (GO:0070372)	11/244	0.00119804	0.0150408	3.18008	21.3926	APP;CD74;NDRG4;GSTP1;TIMP3;APOE;MT3;YWHAZ;HLA-DRB1;CD44;MAPK3
Positive Regulation Of Endocytosis (GO:0045807)	6/79	0.00120327	0.0150408	5.487	36.8875	C3;CD151;APOE;CALR;CLU;B2M
Regulation Of Lipid Metabolic Process (GO:0019216)	5/54	0.00127343	0.0157291	6.7973	45.3111	SERPINA3;RARRES2;PSAP;APOC1;EDF1
Regulation Of Protein Localization To Plasma Membrane (GO:1903076)	6/80	0.00128473	0.0157291	5.41258	36.0326	LGALS3;CLTC;SQSTM1;ACTB;AP2M1;SPTBN1
Response To Type II Interferon (GO:0034341)	6/80	0.00128473	0.0157291	5.41258	36.0326	IFITM3;CD74;IFITM2;CALM1;GAPDH;HLA-DPA1
Positive Regulation Of Cysteine-Type Endopeptidase Activity Involved In Apoptotic Process (GO:0043280)	7/109	0.00128865	0.0157291	4.59031	30.5447	NGFR;NDUFA13;GSN;RACK1;LAPTM5;DYNLL1;CTSD
High-Density Lipoprotein Particle Remodeling (GO:0034375)	3/15	0.00132996	0.0161384	16.5724	109.752	APOC1;APOE;PLTP
Negative Regulation Of Endocytosis (GO:0045806)	4/33	0.00144097	0.0172374	9.16636	59.9703	LGALS3;SYT11;APOC1;RACK1
Positive Regulation Of Release Of Sequestered Calcium Ion Into Cytosol (GO:0051281)	4/33	0.00144097	0.0172374	9.16636	59.9703	CALM3;THY1;CALM1;CALM2
Positive Regulation Of Transferase Activity (GO:0051347)	8/143	0.00144545	0.0172374	3.97057	25.9649	CD74;HSP90AA1;HSP90AB1;HNRNPA2B1;SERINC1;APOE;HLA-DRB1;MAPK3
ATP Metabolic Process (GO:0046034)	4/34	0.00161403	0.0186612	8.86036	56.9634	HSPA8;ATP5F1A;ATP5F1B;ATP1B1
Superoxide Metabolic Process (GO:0006801)	4/34	0.00161403	0.0186612	8.86036	56.9634	PRDX2;PRDX1;MT3;SOD1
Endoplasmic Reticulum Tubular Network Organization (GO:0071786)	3/16	0.0016188	0.0186612	15.2968	98.2984	RTN3;RTN1;RTN4
Negative Regulation Of Natural Killer Cell Mediated Cytotoxicity (GO:0045953)	3/16	0.0016188	0.0186612	15.2968	98.2984	HLA-B;HLA-A;HLA-E
Neuron Projection Organization (GO:0106027)	3/16	0.0016188	0.0186612	15.2968	98.2984	APP;PRNP;MAP1A
Regulation Of Cardiac Muscle Contraction By Regulation Of The Release Of Sequestered Calcium Ion (GO:0010881)	3/16	0.0016188	0.0186612	15.2968	98.2984	CALM3;CALM1;CALM2
Neuron Projection Morphogenesis (GO:0048812)	8/146	0.00164918	0.0189063	3.88366	24.8845	APP;UBB;APLP2;MAP1B;MAP1A;S100A6;S100B;NEFH
Regulation Of Cardiac Muscle Contraction (GO:0055117)	4/35	0.00180102	0.0205337	8.57411	54.1832	CALM3;ATP1B1;CALM1;CALM2
Negative Regulation Of Cell Population Proliferation (GO:0008285)	14/379	0.00185458	0.0210287	2.59306	16.3106	APP;NDRG4;GSTP1;APLP2;DYNLL1;FABP3;RGCC;FTH1;FABP7;APOD;IGFBP7;APOE;B2M;S100A11
Positive Regulation Of Alpha-Beta T Cell Proliferation (GO:0046641)	3/17	0.001944	0.0219228	14.2035	88.6723	CD81;HLA-A;HLA-E
Regulation Of Type II Interferon Production (GO:0032649)	6/87	0.00197893	0.0221961	4.94306	30.7715	PRNP;LAPTM5;HLA-A;CD14;HLA-DRB1;HLA-DPA1
Regulation Of Endothelial Cell Migration (GO:0010594)	6/88	0.00209751	0.0229248	4.88253	30.1106	GPI;SPARC;APOE;CALR;GLUL;DCN
Adenylate Cyclase-Activating Dopamine Receptor Signaling Pathway (GO:0007191)	2/5	0.00217648	0.0229248	44.0649	270.12	GNB1;GNAS
Axo-Dendritic Transport (GO:0008088)	2/5	0.00217648	0.0229248	44.0649	270.12	APP;HSPA8
Regulation Of Plasma Membrane Repair (GO:1905684)	2/5	0.00217648	0.0229248	44.0649	270.12	ANXA2;S100A10
Cell Junction Disassembly (GO:0150146)	2/5	0.00217648	0.0229248	44.0649	270.12	C1QB;C1QC
Glycolipid Transport (GO:0046836)	2/5	0.00217648	0.0229248	44.0649	270.12	PSAP;PLTP
Lipoprotein Metabolic Process (GO:0042157)	2/5	0.00217648	0.0229248	44.0649	270.12	APOE;CTSD
Negative Regulation Of Trophoblast Cell Migration (GO:1901164)	2/5	0.00217648	0.0229248	44.0649	270.12	CALR;TIMP1
Positive Regulation Of CD4-positive, CD25-positive, Alpha-Beta Regulatory T Cell Differentiation (GO:0032831)	2/5	0.00217648	0.0229248	44.0649	270.12	HLA-DRA;HLA-DRB1
Positive Regulation Of Tau-Protein Kinase Activity (GO:1902949)	2/5	0.00217648	0.0229248	44.0649	270.12	HSP90AA1;HSP90AB1
Protection From Natural Killer Cell Mediated Cytotoxicity (GO:0042270)	2/5	0.00217648	0.0229248	44.0649	270.12	HLA-B;HLA-E
Protein Targeting To Vacuole Involved In Autophagy (GO:0071211)	2/5	0.00217648	0.0229248	44.0649	270.12	HSPA8;SQSTM1
Positive Regulation Of Immune Effector Process (GO:0002699)	4/37	0.00221906	0.0232553	8.05364	49.2132	CD81;APLP2;HLA-DRA;HLA-DRB1
Endocytosis (GO:0006897)	9/189	0.00227258	0.0235822	3.35395	20.415	APP;RNASEK;DPYSL2;CLTC;STAB1;APOE;CD14;HSPG2;MAPK3
Antigen Processing And Presentation Of Peptide Antigen Via MHC Class I (GO:0002474)	3/18	0.00230708	0.0235822	13.2559	80.4868	HLA-A;CALR;B2M
Regulation Of Oxidative Stress-Induced Intrinsic Apoptotic Signaling Pathway (GO:1902175)	3/18	0.00230708	0.0235822	13.2559	80.4868	HSPB1;PPIA;SOD1
Lysosomal Lumen Acidification (GO:0007042)	3/18	0.00230708	0.0235822	13.2559	80.4868	ATP6V0B;RNASEK;ATP6V0C
Negative Regulation Of Viral Entry Into Host Cell (GO:0046597)	3/18	0.00230708	0.0235822	13.2559	80.4868	IFITM3;GSN;IFITM2
Cell Junction Organization (GO:0034330)	5/62	0.0023643	0.0239313	5.84092	35.3216	VMP1;APP;C1QA;SNCG;RHOA
Negative Regulation Of Kinase Activity (GO:0033673)	5/62	0.0023643	0.0239313	5.84092	35.3216	GSTP1;HSPB1;THY1;PPIA;YWHAG
Positive Regulation Of Cation Channel Activity (GO:2001259)	4/38	0.00245123	0.0246395	7.81638	46.9855	TMSB4X;CALM3;CALM1;CALM2
Regulation Of Protein Catabolic Process (GO:0042176)	7/122	0.00245802	0.0246395	4.0687	24.4464	EEF1A1;NDUFA13;HSP90AA1;UBB;EEF1A2;APOE;OAZ1
Positive Regulation Of Binding (GO:0051099)	6/91	0.00248556	0.0247959	4.70948	28.244	APP;STMN1;EDF1;TXN;APOE;B2M
Neuron Projection Development (GO:0031175)	9/192	0.00252696	0.0250882	3.29846	19.7272	APP;UBB;MAP1B;STMN1;STMN2;PLP1;APOE;NEFH;GPM6B
Positive Regulation Of MAPK Cascade (GO:0043410)	12/310	0.00263356	0.0259332	2.71281	16.1125	APP;CD74;NDRG4;CD81;LAPTM5;APOE;PPIA;MT3;HLA-DRB1;CD44;MAPK3;SOD1
Positive Regulation Of Phosphorylation (GO:0042327)	10/231	0.00265671	0.0259332	3.03932	18.0252	C3;APP;CD74;HSP90AA1;RARRES2;RACK1;PPIA;MT3;HLA-DRB1;MAPK3
Negative Regulation Of Growth (GO:0045926)	7/124	0.00269346	0.0259332	3.99875	23.6603	NDUFA13;MT2A;PPP2R1A;RACK1;ENO1;MT3;RTN4
Anterograde Axonal Transport (GO:0008089)	4/39	0.00269955	0.0259332	7.59266	44.9081	MAP1A;HSPB1;NEFL;SOD1
Regulation Of Receptor-Mediated Endocytosis (GO:0048259)	4/39	0.00269955	0.0259332	7.59266	44.9081	C3;APOC1;CLU;B2M
Negative Regulation Of Transport (GO:0051051)	4/39	0.00269955	0.0259332	7.59266	44.9081	LGALS3;NDFIP1;SYT11;CRYAB
Neuron Projection Extension (GO:1990138)	4/39	0.00269955	0.0259332	7.59266	44.9081	HSP90AA1;HSP90AB1;MAP1B;S100B
Regulation Of Peptidyl-Serine Phosphorylation (GO:0033135)	6/93	0.00277269	0.0263914	4.60075	27.0889	APP;HSP90AA1;HSP90AB1;RACK1;TXN;CD44
Positive Regulation Of Cellular Component Biogenesis (GO:0044089)	6/93	0.00277269	0.0263914	4.60075	27.0889	LGALS3;RGCC;RACK1;RHOC;PFN1;CLU
Protein Transport (GO:0015031)	12/313	0.0028479	0.0269835	2.68535	15.7393	VMP1;NGFR;CD74;CLTC;CANX;LAPTM5;TXNIP;APOE;CLU;SPTBN1;HSP90B1;YWHAH
Positive Regulation Of Protein Metabolic Process (GO:0051247)	9/196	0.00290072	0.0273591	3.22725	18.8561	APP;NDUFA13;HSP90AA1;CIRBP;APOE;VIM;EEF2;OAZ1;CLU
Regulation Of Tumor Necrosis Factor Production (GO:0032680)	7/127	0.00307863	0.0288109	3.89818	22.5442	APP;SYT11;GSTP1;HSPB1;CD14;CLU;HLA-E
Cellular Response To Copper Ion (GO:0071280)	3/20	0.00315253	0.0288109	11.6952	67.359	PRNP;MT2A;MT3
Microglial Cell Activation (GO:0001774)	3/20	0.00315253	0.0288109	11.6952	67.359	APP;C1QA;CLU
Regulation Of Metallopeptidase Activity (GO:1905048)	2/6	0.00323241	0.0288109	33.047	189.509	TIMP2;TIMP1
Autophagosome Membrane Docking (GO:0016240)	2/6	0.00323241	0.0288109	33.047	189.509	VMP1;CALM1
Intracellular Sequestering Of Iron Ion (GO:0006880)	2/6	0.00323241	0.0288109	33.047	189.509	FTH1;FTL
Membrane Biogenesis (GO:0044091)	2/6	0.00323241	0.0288109	33.047	189.509	SERINC1;SPTBN1
Mitochondrion-Endoplasmic Reticulum Membrane Tethering (GO:1990456)	2/6	0.00323241	0.0288109	33.047	189.509	VMP1;CALM1
Negative Regulation Of Stress-Activated Protein Kinase Signaling Cascade (GO:0070303)	2/6	0.00323241	0.0288109	33.047	189.509	GSTP1;PPIA
Positive Regulation Of Membrane Depolarization (GO:1904181)	2/6	0.00323241	0.0288109	33.047	189.509	RACK1;DCN
Positive Regulation Of Receptor Catabolic Process (GO:2000646)	2/6	0.00323241	0.0288109	33.047	189.509	LAPTM5;APOE
Regulation Of T-helper Cell Differentiation (GO:0045622)	2/6	0.00323241	0.0288109	33.047	189.509	HLA-DRA;HLA-DRB1
Regulation Of Macroautophagy (GO:0016241)	6/96	0.00324904	0.0288109	4.44671	25.477	UCHL1;ATP6V0B;CAPNS1;ATP6V0C;GAPDH;DCN
Positive Regulation Of Supramolecular Fiber Organization (GO:1902905)	6/96	0.00324904	0.0288109	4.44671	25.477	APP;GSN;STMN2;APOE;PFN1;CLU
Negative Regulation Of Cell Migration (GO:0030336)	8/163	0.00327026	0.0288757	3.45471	19.7709	NGFR;CD74;NDRG4;CLIC4;THY1;CALR;TIMP1;DYNLL1
Negative Regulation Of Cellular Catabolic Process (GO:0031330)	5/67	0.00332112	0.0292006	5.36851	30.6405	APOC1;TIMP2;TIMP3;TIMP1;EIF4G2
Regulation Of Protein Localization (GO:0032880)	6/97	0.00342062	0.0299484	4.39762	24.9694	HSP90AA1;HSP90AB1;GPC1;MAP1A;RACK1;CTSD
Chaperone-Mediated Protein Complex Assembly (GO:0051131)	3/21	0.00363749	0.0317134	11.0449	62.0332	HSP90AA1;HSP90AB1;CLU
Epithelial Cell Differentiation (GO:0030855)	7/132	0.00381252	0.0331003	3.7413	20.837	LGALS3;PGK1;TAGLN2;EDF1;ALDOC;CNN3;CTSB
Regulation Of Primary Metabolic Process (GO:0080090)	4/43	0.00386521	0.0332793	6.81254	37.8487	SERPINA3;PSAP;EDF1;APOE
Positive Regulation Of Stress Fiber Assembly (GO:0051496)	4/43	0.00386521	0.0332793	6.81254	37.8487	RGCC;RHOC;RHOA;S100A10
Regulation Of Angiogenesis (GO:0045765)	9/205	0.00390165	0.0334542	3.07764	17.0697	SPARC;RGCC;STAB1;PGK1;HSPB1;GLUL;HSPG2;DCN;GTF2I
Negative Regulation Of Epithelial Cell Proliferation (GO:0050680)	5/70	0.00401367	0.0342731	5.11995	28.2521	ATP5F1A;SPARC;RGCC;APOE;B2M
Regulation Of Mononuclear Cell Migration (GO:0071675)	3/22	0.00416553	0.0342995	10.4631	57.3471	LGALS3;RARRES2;MAPK3
Regulation Of Release Of Sequestered Calcium Ion Into Cytosol By Sarcoplasmic Reticulum (GO:0010880)	3/22	0.00416553	0.0342995	10.4631	57.3471	CALM3;CALM1;CALM2
Cellular Response To Interferon-Beta (GO:0035458)	3/22	0.00416553	0.0342995	10.4631	57.3471	NDUFA13;IFITM2;CALM1
Cytoskeleton-Dependent Intracellular Transport (GO:0030705)	3/22	0.00416553	0.0342995	10.4631	57.3471	TUBA1B;TUBA1A;TUBB2A
Modulation By Host Of Viral Process (GO:0044788)	3/22	0.00416553	0.0342995	10.4631	57.3471	IFI27;FASN;CFL1
Negative Regulation Of Axonogenesis (GO:0050771)	3/22	0.00416553	0.0342995	10.4631	57.3471	THY1;MT3;RTN4
Positive Regulation Of Cholesterol Efflux (GO:0010875)	3/22	0.00416553	0.0342995	10.4631	57.3471	ABCA8;APOE;PLTP
Positive Regulation Of Protein Autophosphorylation (GO:0031954)	3/22	0.00416553	0.0342995	10.4631	57.3471	CALM3;CALM1;CALM2
Positive Regulation Of Viral Life Cycle (GO:1903902)	3/22	0.00416553	0.0342995	10.4631	57.3471	CD74;LGALS1;HLA-DRB1
Response To Unfolded Protein (GO:0006986)	4/44	0.00420234	0.0344658	6.64189	36.3452	HSPA8;HSP90AA1;HSP90AB1;HSPB1
Regulation Of Chaperone-Mediated Autophagy (GO:1904714)	2/7	0.00448064	0.0352172	26.4362	142.967	EEF1A1;EEF1A2
Regulation Of Lipase Activity (GO:0060191)	2/7	0.00448064	0.0352172	26.4362	142.967	RHOC;RHOA
Anterograde Axonal Protein Transport (GO:0099641)	2/7	0.00448064	0.0352172	26.4362	142.967	MAP1A;HSPB1
Axo-Dendritic Protein Transport (GO:0099640)	2/7	0.00448064	0.0352172	26.4362	142.967	MAP1A;HSPB1
Axon Ensheathment In Central Nervous System (GO:0032291)	2/7	0.00448064	0.0352172	26.4362	142.967	PLP1;GPM6B
Neuroepithelial Cell Differentiation (GO:0060563)	2/7	0.00448064	0.0352172	26.4362	142.967	TUBB2A;MAP1B
Positive Regulation Of CD4-positive, Alpha-Beta T Cell Differentiation (GO:0043372)	2/7	0.00448064	0.0352172	26.4362	142.967	HLA-DRA;HLA-DRB1
Positive Regulation Of Leukocyte Differentiation (GO:1902107)	2/7	0.00448064	0.0352172	26.4362	142.967	LGALS3;LGALS1
Positive Regulation Of Plasminogen Activation (GO:0010756)	2/7	0.00448064	0.0352172	26.4362	142.967	ENO1;S100A10
Protein Localization To Presynapse (GO:1905383)	2/7	0.00448064	0.0352172	26.4362	142.967	MAP1A;HSPB1
Regulation Of CD4-positive, Alpha-Beta T Cell Activation (GO:2000514)	2/7	0.00448064	0.0352172	26.4362	142.967	HLA-DRA;HLA-DRB1
Regulation Of Lipid Catabolic Process (GO:0050994)	3/23	0.00473774	0.0365458	9.93939	53.1976	BSCL2;RARRES2;APOC1
Axon Extension (GO:0048675)	3/23	0.00473774	0.0365458	9.93939	53.1976	HSP90AA1;HSP90AB1;MAP1B
Cholesterol Efflux (GO:0033344)	3/23	0.00473774	0.0365458	9.93939	53.1976	APOC1;ABCA8;APOE
Negative Regulation Of Oxidative Stress-Induced Cell Death (GO:1903202)	3/23	0.00473774	0.0365458	9.93939	53.1976	HSPB1;TXN;PPIA
Regulation Of T Cell Migration (GO:2000404)	3/23	0.00473774	0.0365458	9.93939	53.1976	APP;APOD;RHOA
Regulation Of Fibroblast Proliferation (GO:0048145)	4/46	0.00493498	0.0377863	6.32497	33.5945	CD74;GSTP1;FTH1;S100A6
Positive Regulation Of Blood Vessel Endothelial Cell Migration (GO:0043536)	4/46	0.00493498	0.0377863	6.32497	33.5945	ATP5F1A;ATP5F1B;TMSB4X;HSPB1
Regulation Of Neuron Apoptotic Process (GO:0043523)	6/105	0.00504579	0.0384927	4.04061	21.3716	PRNP;UBB;APOE;CLU;MT3;SOD1
Negative Regulation Of Wnt Signaling Pathway (GO:0030178)	7/140	0.00525382	0.0399329	3.51482	18.4486	GPI;IGFBP4;RACK1;APOE;PFDN5;DKK3;TLE5
Response To Calcium Ion (GO:0051592)	6/106	0.00528286	0.0399709	4	20.9732	CLIC4;SYT11;CALM3;CALM1;CLU;CALM2
Regulation Of Microtubule Depolymerization (GO:0031114)	3/24	0.00535513	0.0399709	9.46561	49.5023	MAP1B;MAP1A;STMN2
Regulation Of Ryanodine-Sensitive Calcium-Release Channel Activity (GO:0060314)	3/24	0.00535513	0.0399709	9.46561	49.5023	CALM3;CALM1;CALM2
Response To Copper Ion (GO:0046688)	3/24	0.00535513	0.0399709	9.46561	49.5023	PRNP;MT2A;MT3
Positive Regulation Of Peptidyl-Threonine Phosphorylation (GO:0010800)	3/24	0.00535513	0.0399709	9.46561	49.5023	CALM3;CALM1;CALM2
Negative Regulation Of Cytokine Production (GO:0001818)	8/178	0.00554543	0.0412429	3.14746	16.3504	PRNP;RGCC;SYT11;APLP2;TMSB4X;LAPTM5;APOD;HLA-DRB1
Positive Regulation Of ERK1 And ERK2 Cascade (GO:0070374)	8/179	0.00573151	0.0424745	3.1289	16.1507	APP;CD74;NDRG4;APOE;MT3;HLA-DRB1;CD44;MAPK3
Regulation Of Skeletal Muscle Cell Differentiation (GO:2001014)	2/8	0.00591521	0.0427668	22.0291	113.014	DDX5;GPC1
Sequestering Of Actin Monomers (GO:0042989)	2/8	0.00591521	0.0427668	22.0291	113.014	TMSB4X;TMSB10
Modification-Dependent Macromolecule Catabolic Process (GO:0043632)	2/8	0.00591521	0.0427668	22.0291	113.014	UBB;UBA52
Negative Regulation Of Long-Term Synaptic Potentiation (GO:1900272)	2/8	0.00591521	0.0427668	22.0291	113.014	APP;APOE
Positive Regulation Of CD8-positive, Alpha-Beta T Cell Activation (GO:2001187)	2/8	0.00591521	0.0427668	22.0291	113.014	HLA-A;HLA-E
Positive Regulation Of Membrane Invagination (GO:1905155)	2/8	0.00591521	0.0427668	22.0291	113.014	C3;APLP2
Positive Regulation Of Memory T Cell Differentiation (GO:0043382)	2/8	0.00591521	0.0427668	22.0291	113.014	HLA-DRA;HLA-DRB1
Activation Of Protein Kinase B Activity (GO:0032148)	3/25	0.00601864	0.0430644	9.03489	46.1945	TXN;MT3;PPIA
Regulation Of Lysosomal Lumen pH (GO:0035751)	3/25	0.00601864	0.0430644	9.03489	46.1945	ATP6V0B;RNASEK;ATP6V0C
Negative Regulation Of Stress Fiber Assembly (GO:0051497)	3/25	0.00601864	0.0430644	9.03489	46.1945	STMN1;DYNLL1;PFN1
Regulation Of Proteasomal Ubiquitin-Dependent Protein Catabolic Process (GO:0032434)	6/109	0.00604302	0.0430903	3.8829	19.8372	HSP90AB1;MAP1A;RACK1;ELOB;CLU;GABARAP
Regulation Of Cell Migration (GO:0030334)	14/434	0.0061606	0.0437782	2.24709	11.4367	NGFR;CD74;CLIC4;CD151;APLP2;SEMA3B;THY1;DYNLL1;RHOC;RHOA;ACTG1;TMSB4X;RACK1;TMSB10
Positive Regulation Of Tumor Necrosis Factor Production (GO:0032760)	5/78	0.00635632	0.0450149	4.557	23.0507	APP;HSPB1;CD14;CLU;HLA-E
Macromolecule Biosynthetic Process (GO:0009059)	8/183	0.00652377	0.0460436	3.05675	15.3825	EEF1A1;EEF1G;EEF1D;EEF1A2;APOE;FAU;EEF2;EIF4G2
Positive Regulation Of Cell Death (GO:0010942)	4/50	0.00664732	0.0462348	5.7738	28.9472	C1QA;PRNP;CLU;MT3
Negative Regulation Of Cellular Component Organization (GO:0051129)	5/79	0.0067045	0.0462348	4.49519	22.4983	LGALS3;HSPA8;SYT11;CLU;CRYAB
Positive Regulation Of Catabolic Process (GO:0009896)	5/79	0.0067045	0.0462348	4.49519	22.4983	NDUFA13;HSP90AA1;LAPTM5;CLU;OAZ1
Positive Regulation Of Protein Localization To Membrane (GO:1905477)	5/79	0.0067045	0.0462348	4.49519	22.4983	LGALS3;PRNP;CD81;SQSTM1;SPTBN1
Negative Regulation Of Lipid Metabolic Process (GO:0045833)	3/26	0.00672911	0.0462348	8.64163	43.2195	BSCL2;APOC1;APOD
Negative Regulation Of Protein Polymerization (GO:0032272)	3/26	0.00672911	0.0462348	8.64163	43.2195	STMN1;STMN2;PFN1
Negative Regulation Of Receptor-Mediated Endocytosis (GO:0048261)	3/26	0.00672911	0.0462348	8.64163	43.2195	APP;ANXA2;APOC1
Protein Targeting To Lysosome (GO:0006622)	3/26	0.00672911	0.0462348	8.64163	43.2195	HSPA8;LAPTM5;CLU
Regulation Of Protein Serine/Threonine Kinase Activity (GO:0071900)	6/112	0.00687994	0.0471151	3.77243	18.7835	CALM3;THY1;CALM1;CALM2;ACTB;RHOA
Regulation Of Release Of Sequestered Calcium Ion Into Cytosol (GO:0051279)	4/51	0.00712956	0.0481884	5.65066	27.9341	CALM3;THY1;CALM1;CALM2
Cholesterol Transport (GO:0030301)	4/51	0.00712956	0.0481884	5.65066	27.9341	APOC1;APOE;ABCA8;CLU
Positive Regulation Of Protein Localization To Plasma Membrane (GO:1903078)	4/51	0.00712956	0.0481884	5.65066	27.9341	LGALS3;RACK1;SQSTM1;SPTBN1
Receptor Internalization (GO:0031623)	4/51	0.00712956	0.0481884	5.65066	27.9341	CD81;CLTC;CD9;AP2M1
Regulation Of Protein Ubiquitination (GO:0031396)	6/113	0.0071767	0.0483495	3.73698	18.4492	HSP90AA1;NDFIP1;HSP90AB1;UBB;LAPTM5;SQSTM1
Cytoskeleton-Dependent Cytokinesis (GO:0061640)	5/81	0.00744052	0.048677	4.37645	21.4482	CFL1;STMN1;RHOC;RHOA;SPTBN1
Regulation Of Peptidase Activity (GO:0052547)	3/27	0.00748735	0.048677	8.28114	40.5324	CST3;NDUFA13;CTSB
Clathrin-Dependent Endocytosis (GO:0072583)	3/27	0.00748735	0.048677	8.28114	40.5324	CLTC;CANX;AP2M1
Negative Regulation Of Neurogenesis (GO:0050768)	3/27	0.00748735	0.048677	8.28114	40.5324	THY1;B2M;YWHAH
Positive Regulation Of Nitric Oxide Biosynthetic Process (GO:0045429)	3/27	0.00748735	0.048677	8.28114	40.5324	HSP90AA1;HSP90AB1;CLU
Regulation Of High Voltage-Gated Calcium Channel Activity (GO:1901841)	2/9	0.00753028	0.048677	18.8811	92.3064	CALM3;CALM1
Regulation Of Memory T Cell Differentiation (GO:0043380)	2/9	0.00753028	0.048677	18.8811	92.3064	HLA-DRA;HLA-DRB1
Myelin Maintenance (GO:0043217)	2/9	0.00753028	0.048677	18.8811	92.3064	CLU;SOD1
Positive Regulation Of ATP Metabolic Process (GO:1903580)	2/9	0.00753028	0.048677	18.8811	92.3064	TMSB4X;ENO1
Positive Regulation Of Lipase Activity (GO:0060193)	2/9	0.00753028	0.048677	18.8811	92.3064	RHOC;RHOA
Positive Regulation Of Monocyte Differentiation (GO:0045657)	2/9	0.00753028	0.048677	18.8811	92.3064	CD74;HLA-DRB1
Positive Regulation Of Phagocytosis, Engulfment (GO:0060100)	2/9	0.00753028	0.048677	18.8811	92.3064	C3;APLP2
Regulation Of CD8-positive, Alpha-Beta T Cell Activation (GO:2001185)	2/9	0.00753028	0.048677	18.8811	92.3064	HLA-A;HLA-E
Rho Protein Signal Transduction (GO:0007266)	4/52	0.00763433	0.0490441	5.53266	26.9723	NGFR;ARHGDIA;CFL1;RHOA
Negative Regulation Of Response To Stimulus (GO:0048585)	4/52	0.00763433	0.0490441	5.53266	26.9723	APLP2;THY1;CLU;TLE5
Negative Regulation Of Apoptotic Signaling Pathway (GO:2001234)	5/82	0.00782886	0.0499728	4.31939	20.9488	LGALS3;NDUFA13;GSTP1;CLU;GRINA
Positive Regulation Of Tumor Necrosis Factor Superfamily Cytokine Production (GO:1903557)	5/82	0.00782886	0.0499728	4.31939	20.9488	APP;HSPB1;CD14;CLU;HLA-E
Positive Regulation Of Apoptotic Process (GO:0043065)	10/270	0.00785114	0.0499728	2.57825	12.497	PRNP;LGALS1;RACK1;HTRA1;DYNLL1;CTSD;CLU;SQSTM1;TLE5;SOD1

## Sheet: GO_Cellular_Component_2023_tabl
Term	Overlap	P-value	Adjusted P-value	Odds Ratio	Combined Score	Genes
Secretory Granule Lumen (GO:0034774)	37/316	2.22575e-22	4.87439e-20	9.79295	488.245	LGALS3BP;APP;SERPINA3;GPI;SPARC;HSP90AB1;GSTP1;SRP14;CLU;C3;TMSB4X;TIMP2;TIMP3;TIMP1;A2M;B2M;CTSD;SPTAN1;S100A11;DYNC1H1;HSPA8;HSP90AA1;GSN;ANXA2;PGAM1;RARRES2;NME2;TUBB4B;EEF2;EEF1A1;TUBB2A;PKM;SELENOP;SERPING1;ALDOC;PPIA;FTL
Vesicle (GO:0031982)	32/235	1.71755e-21	1.88071e-19	11.468	548.323	AHNAK;CD81;GSTP1;CLTC;ATP1A1;ACTB;CST3;UBB;CFL1;CD59;APOE;SPTAN1;EDIL3;ANXA2;APLP2;TUBB4B;ATP1B1;YWHAZ;RHOA;MYL6;TUBB2A;PKM;SYT11;GNB1;CD9;TAGLN2;CALM3;CALM1;UBA52;CALM2;PPIA;GAPDH
Focal Adhesion (GO:0005925)	38/387	3.00394e-20	2.19287e-18	8.04193	361.499	CD151;AHNAK;CD81;ITGB4;CLTC;HSPB1;THY1;ACTB;ACTG1;HSP90B1;CNN3;AKAP12;CSRP1;PCBP2;CFL1;ANXA6;CD59;B2M;CD99;YWHAG;MAPK3;HSPA8;GSN;ANXA5;NME2;DYNLL1;HSPG2;YWHAZ;RHOA;MARCKS;CD9;CALR;VIM;PFN1;ATP6V0C;PPIA;CD44;PLEC
Cell-Substrate Junction (GO:0030055)	38/395	6.12505e-20	3.35347e-18	7.85847	347.653	CD151;AHNAK;CD81;ITGB4;CLTC;HSPB1;THY1;ACTB;ACTG1;HSP90B1;CNN3;AKAP12;CSRP1;PCBP2;CFL1;ANXA6;CD59;B2M;CD99;YWHAG;MAPK3;HSPA8;GSN;ANXA5;NME2;DYNLL1;HSPG2;YWHAZ;RHOA;MARCKS;CD9;CALR;VIM;PFN1;ATP6V0C;PPIA;CD44;PLEC
Collagen-Containing Extracellular Matrix (GO:0062023)	36/373	5.59272e-19	2.44961e-17	7.83504	329.288	C1QB;LGALS3BP;SERPINA3;C1QA;SPARC;CD151;SEMA3B;HTRA1;LTBP4;CLU;HSP90B1;LGALS3;LGALS1;GPC1;PSAP;TIMP2;ANXA6;TIMP3;IGFBP7;APOE;A2M;CTSD;EDIL3;S100A10;CTSB;ANXA2;RARRES2;ANXA5;HSPG2;DCN;PKM;S100A6;SERPING1;VWA1;S100A4;C1QC
Ficolin-1-Rich Granule (GO:0101002)	24/184	5.93777e-16	2.16729e-14	10.6196	372.322	HSPA8;GPI;HSP90AA1;HSP90AB1;GSN;PGAM1;GSTP1;NME2;SRP14;EEF2;DYNLL1;CLU;RHOA;EEF1A1;CST3;LGALS3;PKM;FTH1;TIMP2;ALDOC;PPIA;CTSD;ATP6V0C;CTSB
Intracellular Organelle Lumen (GO:0070013)	48/856	2.42661e-15	7.59182e-14	4.45356	149.872	APP;GPI;CD63;SPARC;HSP90AB1;GSTP1;SRP14;HSP90B1;C3;CST3;PRDX5;ATP5F1A;LGALS1;ATP5F1B;FTH1;GPC1;TIMP2;SPP1;IGFBP7;APOE;TIMP1;B2M;CTSD;SPTAN1;CTSB;MAPK3;HSPA8;HSP90AA1;GSN;IGFBP4;PGAM1;APLP2;NME2;EEF2;HSPG2;ATP5F1E;DCN;SOD1;EEF1A1;SELENOM;PKM;CANX;SERPING1;SPARCL1;VWA1;ALDOC;CALR;PPIA
Ficolin-1-Rich Granule Lumen (GO:1904813)	19/123	2.98617e-14	7.81701e-13	12.7404	396.763	HSPA8;GPI;HSP90AA1;HSP90AB1;GSN;PGAM1;GSTP1;NME2;SRP14;EEF2;EEF1A1;CST3;PKM;FTH1;TIMP2;ALDOC;PPIA;CTSD;CTSB
Endocytic Vesicle Membrane (GO:0030666)	21/159	3.21247e-14	7.81701e-13	10.6696	331.496	CD74;CD163;HLA-DRB5;ATP6V0B;CLTC;HLA-B;HLA-C;HLA-A;HLA-E;UBB;STAB1;HLA-DRA;CD9;APOE;CALR;B2M;UBA52;ATP6V0C;AP2M1;HLA-DRB1;HLA-DPA1
Lumenal Side Of Endoplasmic Reticulum Membrane (GO:0098553)	11/27	7.58535e-14	1.66119e-12	46.8261	1414.62	CD74;HLA-DRB5;CANX;HLA-B;HLA-C;HLA-DRA;HLA-A;CALR;HLA-DRB1;HLA-DPA1;HLA-E
Cytoplasmic Vesicle Lumen (GO:0060205)	17/115	1.45633e-12	2.89943e-11	12.0154	327.48	HSPA8;GPI;SERPINA3;HSP90AA1;HSP90AB1;GSN;PGAM1;GSTP1;NME2;SRP14;EEF2;EEF1A1;C3;PKM;ALDOC;PPIA;S100A11
MHC Protein Complex (GO:0042611)	9/21	8.55863e-12	1.56195e-10	50.7423	1293.12	CD74;HLA-DRB5;HLA-B;HLA-C;HLA-DRA;HLA-A;HLA-DRB1;HLA-E;HLA-DPA1
Mitochondrial Respiratory Chain Complex IV (GO:0005751)	8/17	5.0475e-11	8.50309e-10	59.9422	1421.2	NDUFA4;COX4I1;COX7A2;COX5B;COX6A1;COX6C;COX7C;COX6B1
Cytoskeleton (GO:0005856)	33/599	1.29288e-10	2.02243e-09	4.17823	95.134	CLIC4;AHNAK;HSPB1;CLU;NDRG1;ACTB;ACTG1;CNN3;TUBA1B;HINT1;TUBA1A;PPP2R1A;TUBB3;ARHGDIA;CFL1;NEFM;NEFH;SPTAN1;SPTBN1;MAPK3;GSN;DYNLL1;TUBB4B;DYNLL2;TUBB2B;MARCKS;TUBB2A;TAGLN2;ALDOC;VIM;GAPDH;PFDN5;PLEC
Respiratory Chain Complex IV (GO:0045277)	8/19	1.52891e-10	2.23221e-09	49.0386	1108.34	NDUFA4;COX4I1;COX7A2;COX5B;COX6A1;COX6C;COX7C;COX6B1
ER To Golgi Transport Vesicle Membrane (GO:0012507)	11/55	4.79504e-10	6.17714e-09	17.0035	364.865	CD74;HLA-DRB5;HLA-B;HLA-C;HLA-DRA;CD59;HLA-A;B2M;HLA-DRB1;HLA-DPA1;HLA-E
Coated Vesicle Membrane (GO:0030662)	11/55	4.79504e-10	6.17714e-09	17.0035	364.865	CD74;HLA-DRB5;HLA-B;HLA-C;HLA-DRA;CD59;HLA-A;B2M;HLA-DRB1;HLA-DPA1;HLA-E
Extracellular Membrane-Bounded Organelle (GO:0065010)	11/57	7.19991e-10	8.75988e-09	16.2625	342.355	PKM;TUBB2A;CLTC;GNB1;CD9;ATP1A1;APOE;ATP1B1;TUBB4B;EDIL3;SPTAN1
Lysosomal Membrane (GO:0005765)	24/356	9.69452e-10	1.11742e-08	5.07281	105.283	IFITM3;CD63;CD74;HSPA8;HLA-DRB5;ATP6V0B;IFITM2;ANXA2;AHNAK;CLTC;LAPTM5;CLU;EEF1A1;EEF1A2;PSAP;GNB1;ANXA6;HLA-DRA;UBA52;CTSD;ATP6V0C;HLA-DRB1;AP2M1;HLA-DPA1
Endocytic Vesicle (GO:0030139)	18/196	1.02447e-09	1.12179e-08	7.00048	144.904	CD74;HLA-DRB5;CD163;HSP90AA1;SPARC;CLTC;HSP90B1;UBB;SYT11;STAB1;HLA-DRA;CD9;APOE;CALR;UBA52;HLA-DRB1;AP2M1;HLA-DPA1
Extracellular Vesicle (GO:1903561)	11/60	1.28496e-09	1.27911e-08	15.2645	312.504	PKM;TUBB2A;CLTC;GNB1;CD9;ATP1A1;APOE;ATP1B1;TUBB4B;EDIL3;SPTAN1
Transport Vesicle Membrane (GO:0030658)	11/60	1.28496e-09	1.27911e-08	15.2645	312.504	CD74;HLA-DRB5;HLA-B;HLA-C;HLA-DRA;CD59;HLA-A;B2M;HLA-DRB1;HLA-DPA1;HLA-E
Lytic Vacuole Membrane (GO:0098852)	21/287	2.62472e-09	2.49919e-08	5.49915	108.654	IFITM3;CD63;CD74;HSPA8;HLA-DRB5;ATP6V0B;IFITM2;ANXA2;AHNAK;LAPTM5;CLU;PSAP;GNB1;ANXA6;HLA-DRA;UBA52;CTSD;ATP6V0C;HLA-DRB1;AP2M1;HLA-DPA1
Lysosome (GO:0005764)	28/503	2.82555e-09	2.57832e-08	4.16641	82.0139	IFITM3;CD63;IFITM2;AHNAK;CLTC;CLU;GPC1;PSAP;ANXA6;CTSD;AP2M1;CTSB;HLA-DPA1;CD74;HSPA8;HLA-DRB5;ATP6V0B;HSP90AA1;ANXA2;LAPTM5;HSPG2;DCN;SYT11;GNB1;HLA-DRA;UBA52;ATP6V0C;HLA-DRB1
Cytoplasmic Vesicle Membrane (GO:0030659)	24/389	5.5915e-09	4.89815e-08	4.60631	87.5293	CD63;CD74;HLA-DRB5;ATP6V0B;CD163;APLP2;HLA-B;HLA-C;CLU;RHOA;LGALS3;UBB;STAB1;HLA-DRA;CD9;CD14;UBA52;CTSD;ATP6V0C;ITM2B;HLA-DRB1;CD44;AP2M1;HLA-DPA1
Endosome Membrane (GO:0010008)	23/361	6.4306e-09	5.41654e-08	4.75644	89.7168	IFITM3;CD63;HLA-DRB5;ATP6V0B;IFITM2;ANXA2;APLP2;CLTC;HLA-B;HLA-C;HLA-A;NDRG1;HLA-E;UBB;ANXA6;HLA-DRA;CD14;B2M;UBA52;CTSD;ATP6V0C;HLA-DRB1;AP2M1
COPII-coated ER To Golgi Transport Vesicle (GO:0030134)	11/76	1.73583e-08	1.40795e-07	11.4977	205.455	CD74;HLA-DRB5;HLA-B;HLA-C;HLA-DRA;CD59;HLA-A;B2M;HLA-DRB1;HLA-DPA1;HLA-E
Phagocytic Vesicle Membrane (GO:0030670)	9/45	1.88187e-08	1.47189e-07	16.8935	300.508	ATP6V0B;APLP2;HLA-B;HLA-C;HLA-A;CALR;B2M;ATP6V0C;HLA-E
Vacuolar Lumen (GO:0005775)	15/161	2.13813e-08	1.61466e-07	7.04903	124.491	HSPA8;SERPINA3;CD74;DYNC1H1;HSP90AA1;ANXA2;TUBB4B;HSPG2;DCN;C3;TUBB2A;GPC1;PSAP;CTSD;FTL
Endoplasmic Reticulum Lumen (GO:0005788)	19/284	6.41667e-08	4.68417e-07	4.95891	82.1283	APP;IGFBP4;APLP2;HSP90B1;C3;CST3;SELENOM;LGALS1;CANX;SPP1;SERPING1;SPARCL1;VWA1;IGFBP7;APOE;CALR;TIMP1;B2M;MAPK3
Polymeric Cytoskeletal Fiber (GO:0099513)	18/265	1.14242e-07	8.07068e-07	5.02705	80.3571	DYNC1H1;TUBB4B;NDRG1;ACTG1;TUBA1B;TUBB2B;TUBA1A;TUBB2A;TUBB3;DPYSL2;MAP1B;MAP1A;NEFL;NEFM;VIM;HLA-DRB1;PRPH;PLEC
MHC Class I Protein Complex (GO:0042612)	4/5	2.45202e-07	1.6781e-06	266.203	4051.92	HLA-B;HLA-C;HLA-A;HLA-E
Organelle Inner Membrane (GO:0019866)	21/398	6.98074e-07	4.63267e-06	3.85788	54.6852	NDUFA13;UQCRB;NDUFA4;COX4I1;NDUFA1;UQCR11;UQCR10;COX5B;COX6C;COX6A1;COX7C;CLU;ATP5F1E;COX6B1;LGALS3;ATP5F1A;ATP5F1B;IFI27;UQCRQ;NDUFS5;ATP5ME
Clathrin-Coated Endocytic Vesicle Membrane (GO:0030669)	9/68	7.73822e-07	4.98432e-06	10.2958	144.882	CD74;HLA-DRB5;CLTC;CD9;HLA-DRA;APOE;AP2M1;HLA-DRB1;HLA-DPA1
Microtubule (GO:0005874)	14/185	8.27108e-07	5.17533e-06	5.59044	78.2959	DYNC1H1;TUBB4B;NDRG1;TUBA1B;TUBB2B;TUBA1A;TUBB2A;TUBB3;DPYSL2;MAP1B;MAP1A;CALM3;CALM1;CALM2
Platelet Alpha Granule (GO:0031091)	10/89	8.8733e-07	5.26262e-06	8.56438	119.345	APP;SERPINA3;SPARC;TMSB4X;APLP2;SERPING1;CD9;TIMP1;A2M;CLU
Mitochondrial Inner Membrane (GO:0005743)	20/370	8.89118e-07	5.26262e-06	3.94898	55.0213	NDUFA13;UQCRB;NDUFA4;COX4I1;NDUFA1;UQCR11;UQCR10;COX5B;COX6C;COX6A1;COX7C;CLU;ATP5F1E;COX6B1;LGALS3;ATP5F1A;ATP5F1B;UQCRQ;NDUFS5;ATP5ME
Clathrin-Coated Vesicle Membrane (GO:0030665)	10/90	9.85161e-07	5.67764e-06	8.4569	116.963	CD74;HSPA8;HLA-DRB5;CLTC;CD9;HLA-DRA;APOE;AP2M1;HLA-DRB1;HLA-DPA1
Tertiary Granule (GO:0070820)	13/162	1.05754e-06	5.93849e-06	5.94353	81.7803	DYNLL1;CLU;RHOA;CST3;LGALS3;FTH1;TIMP2;ALDOC;CD59;B2M;CTSD;SPTAN1;ATP6V0C
Membrane Raft (GO:0045121)	13/169	1.70472e-06	9.33335e-06	5.6748	75.3733	APP;PRNP;ANXA2;AHNAK;THY1;ATP1A1;DYNLL1;GPC1;PGK1;CD14;CTSD;GPM6B;S100A10
MHC Class II Protein Complex (GO:0042613)	5/15	1.94981e-06	1.04149e-05	33.3729	438.779	CD74;HLA-DRB5;HLA-DRA;HLA-DRB1;HLA-DPA1
Mitochondrial Membrane (GO:0031966)	24/540	2.35538e-06	1.22816e-05	3.2329	41.8945	NDUFA13;UQCRB;NDUFA4;COX4I1;NDUFA1;UQCR11;UQCR10;COX5B;COX6C;COX6A1;COX7C;CLU;ATP5F1E;COX6B1;LGALS3;ATP5F1A;ATP5F1B;IFI27;UBB;UQCRQ;NDUFS5;TOMM7;UBA52;ATP5ME
Phagocytic Vesicle (GO:0045335)	10/100	2.61268e-06	1.33065e-05	7.51341	96.5859	ATP6V0B;SYT11;APLP2;HLA-B;HLA-C;HLA-A;CALR;B2M;ATP6V0C;HLA-E
Clathrin-Coated Endocytic Vesicle (GO:0045334)	9/85	5.17465e-06	2.57556e-05	7.98589	97.2022	CD74;HLA-DRB5;CLTC;CD9;HLA-DRA;APOE;AP2M1;HLA-DRB1;HLA-DPA1
Lysosomal Lumen (GO:0043202)	9/86	5.70435e-06	2.77612e-05	7.88178	95.1668	CD74;HSPA8;HSP90AA1;GPC1;PSAP;CTSD;HSPG2;DCN;CTSB
Autolysosome (GO:0044754)	4/9	5.89211e-06	2.80516e-05	53.2297	640.987	MAP1LC3A;FTH1;SQSTM1;FTL
Platelet Alpha Granule Lumen (GO:0031093)	8/66	6.30434e-06	2.93755e-05	9.27822	111.1	APP;SERPINA3;SPARC;TMSB4X;SERPING1;TIMP1;A2M;CLU
Platelet Dense Granule (GO:0042827)	5/20	9.4652e-06	4.3185e-05	22.2429	257.304	LGALS3BP;CD63;RARRES2;SELENOP;TIMP3
Endocytic Vesicle Lumen (GO:0071682)	5/21	1.22711e-05	5.48443e-05	20.8517	235.796	HSP90AA1;SPARC;APOE;CALR;HSP90B1
Neuron Projection (GO:0043005)	23/557	1.27043e-05	5.56446e-05	2.98015	33.597	APP;RTN3;HSPA8;PRNP;RTN1;STMN2;RHOC;RTN4;UBB;PPP2R1A;TUBB3;SYT11;MAP1B;STMN1;MAP1A;RACK1;NEFL;APOD;NEFM;APOE;VIM;NEFH;PRPH
Tertiary Granule Lumen (GO:1904724)	7/53	1.35995e-05	5.8398e-05	10.2076	114.381	CST3;FTH1;TIMP2;ALDOC;B2M;CTSD;SPTAN1
Mitochondrial Respiratory Chain Complex III (GO:0005750)	4/11	1.50694e-05	6.22681e-05	38.0174	422.101	UQCRB;UQCRQ;UQCR11;UQCR10
Respiratory Chain Complex III (GO:0045275)	4/11	1.50694e-05	6.22681e-05	38.0174	422.101	UQCRB;UQCRQ;UQCR11;UQCR10
Bounding Membrane Of Organelle (GO:0098588)	29/819	1.76242e-05	7.04551e-05	2.56149	28.0387	CD63;RTN1;LGALS3;UBB;STAB1;CD59;CD14;B2M;CTSD;AP2M1;HLA-DPA1;CD74;HLA-DRB5;ATP6V0B;CD163;APLP2;HLA-B;HLA-C;HLA-A;RHOA;HLA-E;HLA-DRA;CD9;CALR;UBA52;ATP6V0C;ITM2B;HLA-DRB1;CD44
Microtubule Cytoskeleton (GO:0015630)	17/342	1.76942e-05	7.04551e-05	3.58114	39.1858	DYNC1H1;CLIC4;CLTC;TUBB4B;NDRG1;MZT2B;TUBA1B;TUBB2B;TUBA1A;TUBB2A;PPP2R1A;TUBB3;DPYSL2;MAP1B;MAP1A;SPTAN1;GAPDH
Secretory Granule Membrane (GO:0030667)	15/279	2.23931e-05	8.75731e-05	3.8748	41.4865	CD63;SPARC;APLP2;HLA-B;HLA-C;DYNLL1;CLU;RHOA;LGALS3;PSAP;CD9;CD59;CD14;ATP6V0C;CD44
Endoplasmic Reticulum Membrane (GO:0005789)	28/801	3.11016e-05	0.000119496	2.52053	26.1587	RTN3;NDRG4;RTN1;RTN4;HSP90B1;UBB;SARAF;CD59;PTGDS;HLA-DPA1;CD74;HLA-DRB5;HLA-B;HLA-C;DHCR24;HLA-A;RHOC;RHOA;HLA-E;VMP1;BSCL2;SCD;CANX;HLA-DRA;SERINC1;CALR;UBA52;HLA-DRB1
Platelet Dense Granule Lumen (GO:0031089)	4/13	3.18846e-05	0.000120392	29.5661	306.109	LGALS3BP;RARRES2;SELENOP;TIMP3
Secondary Lysosome (GO:0005767)	4/15	5.94441e-05	0.000220648	24.188	235.36	MAP1LC3A;FTH1;SQSTM1;FTL
Proton-Transporting V-type ATPase, V0 Domain (GO:0033179)	3/6	6.46264e-05	0.00023202	66.3199	639.78	ATP6V0B;RNASEK;ATP6V0C
Vacuolar Proton-Transporting V-type ATPase, V0 Domain (GO:0000220)	3/6	6.46264e-05	0.00023202	66.3199	639.78	ATP6V0B;RNASEK;ATP6V0C
Nucleus (GO:0005634)	96/4487	7.72013e-05	0.000272695	1.64068	15.5358	EIF4A1;SERPINA3;GPI;HSP90AB1;ADIRF;PEBP1;HSPB1;ENO1;SRP14;CLU;ACTB;ACTG1;LGALS3;MT2A;HINT1;CHCHD2;TUBA1A;CSRP1;PPP2R1A;TUBB3;FTH1;TMSB4X;CFL1;RACK1;TIMP3;GLUL;SKP1;GTF2I;HSP90AA1;TPI1;ANXA2;GPX4;APLP2;CIRBP;NME2;EDF1;FOS;DYNLL1;DYNLL2;YWHAZ;TLE5;EEF1A1;EEF1G;TUBB2B;TUBB2A;PKM;EEF1D;EEF1A2;S100A6;S100A4;PFN1;UBA52;CRYAB;PTMA;PPIA;GAPDH;DDX5;AHNAK;CEBPD;TXN;OAZ1;NDRG1;HSP90B1;PRDX5;LDHA;ATP5F1B;UBB…
Azurophil Granule (GO:0042582)	10/155	0.000120089	0.000417452	4.65042	41.9806	C3;SERPINA3;CD63;DYNC1H1;TUBB2A;ANXA2;PSAP;TUBB4B;ATP6V0C;FTL
High-Density Lipoprotein Particle (GO:0034364)	4/18	0.000128607	0.000440079	19.0019	170.233	APOC1;APOE;CLU;PLTP
Intracellular Membrane-Bounded Organelle (GO:0043231)	106/5175	0.000163358	0.00055039	1.57709	13.7515	EIF4A1;SPARC;PEBP1;ENO1;SRP14;CLU;ACTB;ACTG1;LGALS3;MT2A;CHCHD2;PPP2R1A;TUBB3;FTH1;CFL1;GLUL;SKP1;GTF2I;APLP2;CIRBP;TLE5;EEF1A1;EEF1A2;S100A6;S100A4;PFN1;UBA52;PPIA;SQSTM1;DDX5;TXN;OAZ1;NDRG1;HSP90B1;PRDX5;LDHA;UBB;PRDX1;PCBP2;PSAP;S100A13;APOE;PLTP;SERF2;S100A11;HSPA8;PRNP;DHCR24;ABCA8;EEF2;QKI;EIF1;RGCC;ID3;CALM3;CALR;CALM1;CALM2;ITM2B;SERPINA3;GPI;HSP90AB1;ADIRF;HSPB1;HINT1;TUBA1A;MAP1LC3A;CSR…
Intermediate Filament Cytoskeleton (GO:0045111)	7/81	0.000214571	0.000711984	6.33622	53.5213	NEFL;NEFM;VIM;PFDN5;HLA-DRB1;PLEC;PRPH
Autophagosome (GO:0005776)	7/83	0.000249764	0.000816393	6.16885	51.1706	VMP1;HSPA8;MAP1LC3A;FTH1;SQSTM1;GABARAP;FTL
Late Endosome Membrane (GO:0031902)	7/85	0.000289461	0.000932236	6.01006	48.9669	CD63;HLA-DRB5;IFITM2;ANXA2;ANXA6;HLA-DRA;HLA-DRB1
Azurophil Granule Lumen (GO:0035578)	7/89	0.000384038	0.0012189	5.71572	44.9529	C3;SERPINA3;DYNC1H1;TUBB2A;ANXA2;TUBB4B;FTL
Endosome Lumen (GO:0031904)	4/25	0.000489456	0.0015237	12.6634	96.5235	APP;CD63;B2M;CTSB
Cortical Actin Cytoskeleton (GO:0030864)	5/44	0.000493984	0.0015237	8.54455	65.0497	EEF1A1;GSN;DYNLL1;SPTAN1;SPTBN1
Intermediate Filament (GO:0005882)	6/69	0.00058786	0.00178807	6.36119	47.321	NEFL;NEFM;VIM;HLA-DRB1;PLEC;PRPH
Recycling Endosome Membrane (GO:0055038)	6/70	0.000634993	0.00190498	6.26148	46.0964	HLA-B;HLA-C;HLA-A;B2M;NDRG1;HLA-E
Recycling Endosome (GO:0055037)	9/159	0.000681245	0.00201612	4.03093	29.3919	APP;TUBA1A;SYT11;HLA-B;HLA-C;HLA-A;B2M;NDRG1;HLA-E
trans-Golgi Network Membrane (GO:0032588)	7/100	0.000775905	0.00226564	5.03685	36.0713	APP;CD74;HLA-DRB5;CLTC;HLA-DRA;HLA-DRB1;HLA-DPA1
Dendrite (GO:0030425)	12/270	0.00082266	0.00237056	3.13986	22.3023	HSPA8;PRNP;TUBB3;SYT11;MAP1B;MAP1A;RACK1;APOD;THY1;APOE;CLU;SOD1
Axon (GO:0030424)	10/205	0.00110072	0.00309049	3.44916	23.4949	APP;TUBB3;SYT11;MAP1B;MAP1A;NEFL;NEFM;VIM;NEFH;PRPH
Late Endosome (GO:0005770)	10/205	0.00110072	0.00309049	3.44916	23.4949	CD63;HLA-DRB5;IFITM2;ANXA2;PSAP;ANXA6;HLA-DRA;HLA-DRB1;TPT1;MAPK3
Spindle (GO:0005819)	10/210	0.00131939	0.00365755	3.36207	22.2925	MZT2B;TUBB2B;TUBB2A;TUBB3;CLTC;CALM3;CALM1;DYNLL1;TUBB4B;CALM2
Actin Cytoskeleton (GO:0015629)	13/327	0.0014017	0.00383716	2.79653	18.3734	CLIC4;GSN;AHNAK;DYNLL1;ACTB;ACTG1;CNN3;EEF1A1;MARCKS;CFL1;TAGLN2;SPTAN1;SPTBN1
Ficolin-1-Rich Granule Membrane (GO:0101003)	5/60	0.00204449	0.00552769	6.05393	37.4896	LGALS3;DYNLL1;CLU;ATP6V0C;RHOA
Nuclear Envelope Lumen (GO:0005641)	2/5	0.00217648	0.00581279	44.0649	270.12	APP;TUBB2A
Mitochondrial Proton-Transporting ATP Synthase Complex (GO:0005753)	3/18	0.00230708	0.00601489	13.2559	80.4868	ATP5F1B;ATP5F1E;ATP5ME
Proton-Transporting ATP Synthase Complex (GO:0045259)	3/18	0.00230708	0.00601489	13.2559	80.4868	ATP5F1B;ATP5F1E;ATP5ME
Cortical Cytoskeleton (GO:0030863)	5/63	0.00253716	0.00653691	5.73992	34.3058	EEF1A1;GSN;DYNLL1;SPTAN1;SPTBN1
Hemidesmosome (GO:0030056)	2/6	0.00323241	0.00808023	33.047	189.509	ITGB4;PLEC
Mitochondrial Respiratory Chain Complex I (GO:0005747)	4/41	0.00324685	0.00808023	7.18152	41.1506	NDUFA13;NDUFA4;NDUFS5;NDUFA1
Respiratory Chain Complex I (GO:0045271)	4/41	0.00324685	0.00808023	7.18152	41.1506	NDUFA13;NDUFA4;NDUFS5;NDUFA1
Proton-Transporting V-type ATPase Complex (GO:0033176)	3/21	0.00363749	0.00895068	11.0449	62.0332	ATP6V0B;RNASEK;ATP6V0C
Intracellular Non-Membrane-Bounded Organelle (GO:0043232)	30/1195	0.00404677	0.00984713	1.76776	9.74009	DDX5;ITGB4;CLTC;PRUNE2;HSPB1;CLU;ACTB;ACTG1;HINT1;ARHGDIA;S100A13;NEFH;SPTBN1;MAPK3;GSN;ANXA2;EDF1;DYNLL1;TUBB4B;DYNLL2;MZT2B;VMP1;EEF1A1;BSCL2;TUBB2A;RGCC;SCD;ALDOC;VIM;GAPDH
Vacuolar Proton-Transporting V-type ATPase Complex (GO:0016471)	3/24	0.00535513	0.0128876	9.46561	49.5023	ATP6V0B;RNASEK;ATP6V0C
Chylomicron (GO:0042627)	2/8	0.00591521	0.0140808	22.0291	113.014	APOC1;APOE
Glutamatergic Synapse (GO:0098978)	5/78	0.00635632	0.0149681	4.557	23.0507	APOE;DYNLL2;YWHAZ;ACTB;RHOA
Lytic Vacuole (GO:0000323)	9/223	0.00670002	0.0156096	2.81617	14.0967	HSPA8;SYT11;CLTC;PSAP;LAPTM5;HLA-DRA;CTSD;CLU;CTSB
Sarcolemma (GO:0042383)	4/52	0.00763433	0.0175991	5.53266	26.9723	AHNAK2;ATP1A1;ATP1B1;PLEC
Early Endosome Membrane (GO:0031901)	6/116	0.00812247	0.0185294	3.63451	17.4933	IFITM3;HLA-B;HLA-C;HLA-A;B2M;HLA-E
Endolysosome (GO:0036019)	3/28	0.00829407	0.0187258	7.94949	38.0957	CLTC;AP2M1;CTSB
Specific Granule Lumen (GO:0035580)	4/61	0.0132566	0.0296245	4.65695	20.1332	TIMP2;B2M;CTSD;SPTAN1
Cytoplasmic Side Of Lysosomal Membrane (GO:0098574)	2/12	0.0134021	0.0296471	13.2148	56.9866	EEF1A1;EEF1A2
Asymmetric Synapse (GO:0032279)	6/133	0.0152323	0.0332745	3.14527	13.1609	RTN3;PRNP;GAP43;RTN1;SYT11;RTN4
Autophagosome Membrane (GO:0000421)	3/35	0.0153458	0.0332745	6.20833	25.9317	VMP1;MAP1LC3A;GABARAP
Triglyceride-Rich Plasma Lipoprotein Particle (GO:0034385)	2/14	0.0181181	0.0385229	11.0112	44.1642	APOC1;APOE
Very-Low-Density Lipoprotein Particle (GO:0034361)	2/14	0.0181181	0.0385229	11.0112	44.1642	APOC1;APOE
Organelle Envelope Lumen (GO:0031970)	4/68	0.0190805	0.0397964	4.14611	16.4148	APP;CHCHD2;TUBB2A;SOD1
Spindle Microtubule (GO:0005876)	4/68	0.0190805	0.0397964	4.14611	16.4148	CLTC;CALM3;CALM1;CALM2
Axonal Growth Cone (GO:0044295)	2/15	0.0207009	0.0423691	10.1637	39.4104	HSP90AA1;HSP90AB1
Cation-Transporting ATPase Complex (GO:0090533)	2/15	0.0207009	0.0423691	10.1637	39.4104	ATP1A1;ATP1B1
Mitotic Spindle (GO:0072686)	6/143	0.0209937	0.0425705	2.9142	11.2591	TUBB2B;TUBB2A;TUBB3;CLTC;DYNLL1;TUBB4B
Mitochondrial Envelope (GO:0005740)	6/146	0.0229749	0.045808	2.85131	10.759	NDUFA13;CHCHD2;ATP5F1B;IFI27;NDUFA1;SOD1
Tertiary Granule Membrane (GO:0070821)	4/72	0.0230186	0.045808	3.90143	14.7141	CD59;DYNLL1;CLU;ATP6V0C
Cytosolic Small Ribosomal Subunit (GO:0022627)	3/41	0.0234101	0.045808	5.22648	19.6233	RACK1;FAU;UBA52
Platelet Alpha Granule Membrane (GO:0031092)	2/16	0.0234269	0.045808	9.4372	35.426	SPARC;CD9
Small Ribosomal Subunit (GO:0015935)	3/42	0.024938	0.0483312	5.0922	18.7972	RACK1;FAU;UBA52

## Sheet: GO_Molecular_Function_2023_tabl
Term	Overlap	P-value	Adjusted P-value	Odds Ratio	Combined Score	Genes
MHC Class II Protein Complex Binding (GO:0023026)	12/25	4.54913e-16	1.3056e-13	63.0994	2229.07	CD74;HSPA8;HLA-DRB5;HSP90AA1;HSP90AB1;PKM;CD81;HLA-DRA;ATP1B1;B2M;HLA-DRB1;HLA-DPA1
Ubiquitin Protein Ligase Binding (GO:0031625)	25/271	4.69096e-13	6.73153e-11	7.18921	204.087	GPI;HSP90AB1;CLU;GABARAP;RTN4;ACTG1;TUBA1B;UCHL1;MAP1LC3A;UBB;PCBP2;ELOB;NGFR;HSPA8;HSP90AA1;TPI1;LAPTM5;YWHAZ;TUBB2A;SYT11;TXNIP;CALR;UBA52;ATP6V0C;SQSTM1
Ubiquitin-Like Protein Ligase Binding (GO:0044389)	25/289	1.97904e-12	1.89328e-10	6.69284	180.361	GPI;HSP90AB1;CLU;GABARAP;RTN4;ACTG1;TUBA1B;UCHL1;MAP1LC3A;UBB;PCBP2;ELOB;NGFR;HSPA8;HSP90AA1;TPI1;LAPTM5;YWHAZ;TUBB2A;SYT11;TXNIP;CALR;UBA52;ATP6V0C;SQSTM1
Cadherin Binding (GO:0045296)	24/319	1.04181e-10	7.47497e-09	5.71997	131.473	HSPA8;HSP90AB1;ANXA2;AHNAK;ENO1;EEF2;NDRG1;YWHAZ;RTN4;CNN3;EEF1G;LDHA;PKM;EEF1D;PRDX1;FASN;RACK1;TAGLN2;PFN1;SPTAN1;SPTBN1;S100A11;EIF4G2;PLEC
RNA Binding (GO:0003723)	50/1411	1.08253e-08	6.21375e-07	2.69493	49.4287	EIF4A1;HSP90AB1;CLTC;PEBP1;HSPB1;ENO1;SRP14;LGALS3;TUBA1B;LGALS1;CSRP1;TMSB4X;RACK1;YWHAG;HSP90AA1;ANXA2;CIRBP;EDF1;HLA-A;YWHAZ;DCN;EEF1A1;PKM;CANX;S100A4;PFN1;PPIA;PLEC;DDX5;AHNAK;TXN;RTN4;HSP90B1;ATP5F1A;PRDX1;PCBP2;SPTBN1;DYNC1H1;HSPA8;TUBB4B;EEF2;QKI;EIF1;FASN;HNRNPA2B1;CALR;FAU;VIM;EIF4G2;TPT1
Amyloid-Beta Binding (GO:0001540)	11/79	2.63193e-08	1.25894e-06	10.9888	191.787	CST3;C1QA;CD74;NGFR;PRNP;APOE;CLU;HSPG2;CRYAB;PFDN5;ITM2B
Calcium Ion Binding (GO:0005509)	21/346	6.84821e-08	2.80777e-06	4.48718	74.0236	SPARC;GSN;ANXA2;C1R;ANXA5;LTBP4;S100B;CLU;HSP90B1;SYT11;CANX;S100A13;ANXA6;S100A6;SPARCL1;CALM3;CALR;CALM1;MYL9;CALM2;TPT1
Oxidoreduction-Driven Active Transmembrane Transporter Activity (GO:0015453)	9/54	1.00342e-07	3.59975e-06	13.5086	217.687	UQCRB;NDUFA4;COX4I1;NDUFS5;NDUFA1;UQCR10;COX5B;COX7C;COX6B1
Endopeptidase Inhibitor Activity (GO:0004866)	12/112	1.20901e-07	3.85541e-06	8.16667	130.081	CST3;APP;PRNP;SERPINA3;PCSK1N;ANXA2;APLP2;TIMP2;SERPING1;TIMP3;TIMP1;GAPDH
Adenylate Cyclase Regulator Activity (GO:0010854)	4/5	2.45202e-07	7.03729e-06	266.203	4051.92	GNAS;CALM3;CALM1;CALM2
Low-Density Lipoprotein Particle Receptor Binding (GO:0050750)	6/22	6.60404e-07	1.72305e-05	25.1071	357.285	CLTC;APOE;CLU;HSPG2;AP2M1;HSP90B1
Active Monoatomic Ion Transmembrane Transporter Activity (GO:0022853)	6/24	1.1616e-06	2.77815e-05	22.3152	304.953	UQCRB;COX4I1;UQCR10;COX5B;COX7C;COX6B1
Lipoprotein Particle Receptor Binding (GO:0070325)	6/27	2.45969e-06	5.43023e-05	19.1244	247.001	CLTC;APOE;CLU;HSPG2;AP2M1;HSP90B1
Metal Ion Binding (GO:0046872)	23/521	4.29888e-06	8.8127e-05	3.20159	39.5625	GPI;SPARC;GSN;ANXA2;C1R;ANXA5;LTBP4;S100B;CLU;HSP90B1;SYT11;CANX;S100A13;ANXA6;S100A6;SPARCL1;CALM3;APOE;CALR;CALM1;MYL9;CALM2;TPT1
MHC Protein Binding (GO:0042287)	6/34	1.02312e-05	0.000195757	14.3382	164.747	CD74;ATP5F1B;TUBB2A;CD81;TUBB4B;HLA-E
Cytochrome-C Oxidase Activity (GO:0004129)	4/12	2.23374e-05	0.00039345	33.2635	356.227	COX4I1;COX5B;COX7C;COX6B1
Tau Protein Binding (GO:0048156)	6/39	2.33054e-05	0.00039345	12.1626	129.737	HSP90AA1;HSP90AB1;MAP1A;APOE;S100B;CLU
MHC Class I Protein Binding (GO:0042288)	4/13	3.18846e-05	0.000468908	29.5661	306.109	ATP5F1B;TUBB2A;TUBB4B;HLA-E
Protein Kinase Binding (GO:0019901)	21/511	3.26577e-05	0.000468908	2.95084	30.4805	HSP90AA1;PGAM1;GSTP1;CLTC;PEBP1;HSPB1;THY1;EEF2;YWHAZ;ACTB;EEF1A1;HINT1;RGCC;EEF1A2;RACK1;CALM3;CALM1;CALM2;NEFH;SQSTM1;YWHAG
Cyclase Activator Activity (GO:0010853)	3/5	3.26765e-05	0.000468908	99.4848	1027.56	GNAS;CALM3;CALM2
Copper Ion Binding (GO:0005507)	6/45	5.39527e-05	0.000703837	10.2883	101.108	PRNP;GPC1;S100A13;SNCG;MT3;SOD1
Proton Transmembrane Transporter Activity (GO:0015078)	6/45	5.39527e-05	0.000703837	10.2883	101.108	UQCRB;COX4I1;UQCR10;COX5B;COX7C;COX6B1
Purine Ribonucleoside Triphosphate Binding (GO:0035639)	19/476	0.000113581	0.00141729	2.84711	25.8603	GPI;HSPA8;NDUFA13;HSP90AA1;HSP90AB1;ATP1A1;RHOC;TUBB4B;RHOA;EEF1A1;TUBA1B;TUBB2B;ATP5F1A;TUBA1A;TUBB2A;GUK1;TUBB3;ANXA6;PGK1
RAGE Receptor Binding (GO:0050786)	3/8	0.000176957	0.00203146	39.7879	343.752	S100A13;S100A4;S100B
Adenylate Cyclase Binding (GO:0008179)	3/8	0.000176957	0.00203146	39.7879	343.752	AKAP12;CALM3;CALM2
Protein Kinase C Binding (GO:0005080)	5/36	0.000189103	0.00208741	10.754	92.1961	HINT1;RACK1;HSPB1;SQSTM1;YWHAG
Kinase Binding (GO:0019900)	18/460	0.000218799	0.00232575	2.78107	23.4371	GSN;HSP90AB1;PGAM1;CLTC;PEBP1;HSPB1;THY1;EEF2;YWHAZ;ACTB;EEF1A1;RGCC;EEF1A2;CALM3;CALM1;CALM2;NEFH;SQSTM1
MHC Class II Receptor Activity (GO:0032395)	3/9	0.00026249	0.00259774	33.1549	273.372	HLA-DRA;HLA-DRB1;HLA-DPA1
Phospholipase Inhibitor Activity (GO:0004859)	3/9	0.00026249	0.00259774	33.1549	273.372	ANXA2;ANXA5;APOC1
Disordered Domain Specific Binding (GO:0097718)	4/23	0.000350803	0.00335601	13.9979	111.357	HSP90AA1;HSP90AB1;CLTC;GAPDH
Double-Stranded RNA Binding (GO:0003725)	6/65	0.000425811	0.00394219	6.79384	52.7305	EIF4A1;TUBA1B;HSP90AB1;CLTC;VIM;TUBB4B
Protease Binding (GO:0002020)	8/125	0.000602757	0.00540598	4.58565	33.998	CST3;PRNP;ANXA2;PSAP;CLTC;TIMP2;TIMP3;TIMP1
Guanyl Ribonucleotide Binding (GO:0032561)	11/226	0.000641112	0.00557573	3.44951	25.3618	EEF1A1;TUBA1B;TUBB2B;TUBA1A;TUBB2A;TUBB3;ANXA6;NME2;RHOC;TUBB4B;RHOA
Titin Binding (GO:0031432)	3/12	0.000664871	0.0056123	22.0999	161.681	CALM3;CALM1;CALM2
Insulin-Like Growth Factor Receptor Binding (GO:0005159)	3/13	0.000854768	0.0068144	19.8889	140.509	GNAS;YWHAG;YWHAH
Metalloendopeptidase Inhibitor Activity (GO:0008191)	3/13	0.000854768	0.0068144	19.8889	140.509	TIMP2;TIMP3;TIMP1
GTP Binding (GO:0005525)	10/201	0.000947973	0.0073532	3.52212	24.5181	EEF1A1;TUBA1B;TUBB2B;TUBA1A;TUBB2A;TUBB3;ANXA6;RHOC;TUBB4B;RHOA
SH2 Domain Binding (GO:0042169)	4/31	0.00113438	0.00856755	9.84635	66.7747	GPI;RACK1;DYNLL1;SQSTM1
Serine-Type Endopeptidase Inhibitor Activity (GO:0004867)	5/53	0.00116966	0.00860752	6.93927	46.8473	APP;SERPINA3;ANXA2;APLP2;SERPING1
Protein Phosphatase Activator Activity (GO:0072542)	3/15	0.00132996	0.00954248	16.5724	109.752	CALM3;CALM1;CALM2
Phosphatase Activator Activity (GO:0019211)	3/17	0.001944	0.013284	14.2035	88.6723	CALM3;CALM1;CALM2
Cadherin Binding Involved In Cell-Cell Adhesion (GO:0098641)	3/17	0.001944	0.013284	14.2035	88.6723	ANXA2;S100A11;CNN3
Phosphatidylcholine-Sterol O-acyltransferase Activator Activity (GO:0060228)	2/5	0.00217648	0.0141527	44.0649	270.12	APOC1;APOE
Protein Phosphatase Regulator Activity (GO:0019888)	5/61	0.00220016	0.0141527	5.94552	36.382	LGALS3;PPP2R1A;CALM3;CALM1;CALM2
Peptidase Inhibitor Activity (GO:0030414)	4/37	0.00221906	0.0141527	8.05364	49.2132	CST3;PCSK1N;TIMP2;TIMP1
R-SMAD Binding (GO:0070412)	3/19	0.00270948	0.0169048	12.4268	73.4546	DDX5;RGCC;FOS
MHC Class II Protein Binding (GO:0042289)	2/6	0.00323241	0.0193271	33.047	189.509	CD74;CD81
Aspartic-Type Endopeptidase Inhibitor Activity (GO:0019828)	2/6	0.00323241	0.0193271	33.047	189.509	PRNP;GAPDH
CD4 Receptor Binding (GO:0042609)	2/7	0.00448064	0.0257189	26.4362	142.967	CD74;HLA-DRB1
Phosphatidylethanolamine Binding (GO:0008429)	2/7	0.00448064	0.0257189	26.4362	142.967	PEBP1;PLTP
Actin Monomer Binding (GO:0003785)	3/23	0.00473774	0.0266614	9.93939	53.1976	TMSB4X;PFN1;TMSB10
Calcium-Dependent Phospholipid Binding (GO:0005544)	4/47	0.00533148	0.0294257	6.17756	32.3341	ANXA2;SYT11;ANXA5;ANXA6
Cuprous Ion Binding (GO:1903136)	2/8	0.00591521	0.0320314	22.0291	113.014	PRNP;SNCG
Actin Binding (GO:0003779)	8/183	0.00652377	0.0346726	3.05675	15.3825	GSN;MAP1B;TMSB4X;MAP1A;PFN1;TMSB10;SPTAN1;SPTBN1
Lipase Inhibitor Activity (GO:0055102)	2/9	0.00753028	0.0392944	18.8811	92.3064	ANXA5;APOC1
Transition Metal Ion Binding (GO:0046914)	14/456	0.00930547	0.0469278	2.1328	9.97545	PRNP;S100B;MT3;SOD1;MT2A;CSRP1;SCD;FTH1;GPC1;S100A13;TIMP2;CALR;TIMP1;FTL
Calcium Channel Inhibitor Activity (GO:0019855)	2/10	0.00932015	0.0469278	16.5201	77.2412	CALM1;CALM2
Tubulin Binding (GO:0015631)	11/322	0.00967738	0.0478864	2.37296	11.0057	PRNP;MAP1LC3A;MAP1B;STMN1;MAP1A;STMN2;NEFM;NEFH;NDRG1;GAPDH;GABARAP

## Sheet: MGI_Mammalian_Phenotype_Level_4
Term	Overlap	P-value	Adjusted P-value	Odds Ratio	Combined Score	Genes
abnormal myelin sheath morphology MP:0003871	11/44	3.55805e-11	4.39292e-08	22.684	545.759	LGI4;MPZ;PSAP;CANX;PLP1;PMP22;MBP;APOE;HSPG2;GPM6B;QKI
demyelination MP:0000921	13/72	4.82208e-11	4.39292e-08	15.079	358.206	LGI4;HLA-A;HSPG2;NDRG1;QKI;MPZ;STMN1;CANX;EEF1A2;PSAP;PLP1;PMP22;MBP
abnormal axon morphology MP:0005404	15/119	3.15003e-10	1.91312e-07	9.917	216.969	LGI4;KLC1;HSPG2;GAP43;TUBB2A;MAP1B;MAP1A;PSAP;PLP1;PMP22;NEFL;NEFH;GPM6B;PRPH;PLEC
decreased body weight MP:0001262	46/1329	9.19434e-08	4.18802e-05	2.59966	42.1199	APP;GPI;CLIC4;SPARC;AHNAK;LTBP4;DBI;KLC1;ACTB;ACTG1;C3;FADS2;UCHL1;HINT1;PCSK1N;TUBA1A;PCBP2;PSAP;RACK1;ANXA6;TIMP3;IGFBP7;MBP;APOE;CTSD;SPTBN1;TPI1;ANXA2;IGFBP4;LGI4;TSC22D3;DHCR24;FOS;HSPG2;SOD1;BSCL2;GAP43;RGCC;NACA;MAP1B;PLP1;GNAS;SERINC1;PFN1;FTL;PLEC
ataxia MP:0001393	16/221	2.47253e-07	9.00988e-05	5.35761	81.5045	NGFR;PRNP;TMEM176B;QKI;UCHL1;MAP1B;MPZ;MAP1A;CANX;PSAP;PLP1;GNAS;PMP22;MBP;CTSD;PFDN5
premature death MP:0002083	34/869	3.41395e-07	0.00010367	2.8878	43	APP;C1QA;NDRG2;NDRG1;ACTB;ACTG1;AKAP12;UCHL1;GNG3;PRDX1;ARHGDIA;MPZ;PSAP;TIMP3;MBP;APOE;CTSD;SPTBN1;MAPK3;PRNP;NDFIP1;GSN;NDUFA1;FOS;HSPG2;QKI;SOD1;GAP43;MAP1B;EEF1A2;PLP1;SQSTM1;PFDN5;TPT1
no abnormal phenotype detected MP:0002169	51/1654	6.06039e-07	0.000157743	2.3123	33.1036	APP;CLTC;HSPB1;SAT1;ACTB;AKAP12;HINT1;PPP2R1A;STMN1;STAB1;TIMP2;NEFL;SPTAN1;YWHAG;GTF2I;TPI1;GPX4;APLP2;ANXA5;MIF;FOS;DYNLL1;ATP1B1;RHOA;DCN;PKM;TXNIP;ALDOC;S100A4;CD44;PLEC;C1QA;RTN1;AHNAK;SEMA3B;THY1;GABARAP;RTN4;C3;LDHA;PCBP2;PSAP;NGFR;PRNP;S100B;NACA;SYT11;GNAS;ID3;TPT1;GRINA
decreased nerve conduction velocity MP:0008814	6/29	3.8488e-06	0.000768806	17.4596	217.682	MPZ;CANX;PMP22;MBP;NDRG1;PLEC
abnormal aerobic respiration MP:0010957	5/17	3.91997e-06	0.000768806	27.8079	346.193	BSCL2;CD163;SAT1;SQSTM1;PLEC
tremors MP:0000745	16/274	4.21957e-06	0.000768806	4.24544	52.5406	NGFR;PRNP;NDRG1;QKI;SOD1;UCHL1;MAP1B;MPZ;CANX;EEF1A2;PSAP;PLP1;GNAS;PMP22;NEFL;MBP
hindlimb paralysis MP:0000755	8/67	7.06693e-06	0.00107342	9.1205	108.17	UCHL1;MPZ;MAP1B;PSAP;PLP1;PMP22;MBP;NDRG1
abnormal brain white matter morphology MP:0008026	6/32	7.06973e-06	0.00107342	15.4427	183.146	PRNP;PSAP;PLP1;MBP;KLC1;QKI
increased susceptibility to age-related hearing loss MP:0004748	5/21	1.22711e-05	0.00171984	20.8517	235.796	NGFR;FBXO2;ACTB;ACTG1;SOD1
abnormal sciatic nerve morphology MP:0002651	6/36	1.44489e-05	0.00186487	13.381	149.129	NGFR;LGI4;MPZ;NEFL;APOE;COX6A1
abnormal neuron morphology MP:0002882	9/97	1.5353e-05	0.00186487	6.89269	76.4	APP;NGFR;TUBA1A;CD81;MPZ;PSAP;PMP22;MBP;APOE
increased sensitivity to induced morbidity/mortality MP:0009763	12/181	1.94324e-05	0.00221287	4.81534	52.2395	C3;FADS2;LGALS3;FABP3;GPX3;SPP1;TXNIP;TIMP3;APOD;TIMP1;VIM;CD44
increased hepatocellular carcinoma incidence MP:0003331	7/57	2.21619e-05	0.00237523	9.38908	100.624	LGALS3;PRDX1;TXNIP;S100A4;NDRG2;SPTBN1;SOD1
axon degeneration MP:0005405	7/58	2.48834e-05	0.00251875	9.20451	97.5799	UCHL1;STMN1;PSAP;PLP1;PMP22;KLC1;NEFH
increased interleukin-2 secretion MP:0008687	6/40	2.70752e-05	0.00259637	11.8043	124.145	LGALS1;NDFIP1;RGCC;LAPTM5;MBP;PPIA
hemolytic anemia MP:0001585	5/26	3.7302e-05	0.00339821	15.883	161.95	PRDX2;LDHA;TPI1;PRDX1;CD59
abnormal myelination MP:0000920	8/86	4.49526e-05	0.00358227	6.89217	68.9899	LGI4;MPZ;MAP1B;PSAP;PLP1;PMP22;MBP;QKI
paraparesis MP:0009434	5/27	4.52208e-05	0.00358227	15.1602	151.662	PSAP;EEF1A2;PLP1;NDRG1;QKI
abnormal nerve conduction MP:0005403	5/27	4.52208e-05	0.00358227	15.1602	151.662	MPZ;MAP1B;STMN1;PLP1;COX6A1
increased tumor necrosis factor secretion MP:0008560	8/88	5.30653e-05	0.00402854	6.71918	66.1435	LGALS3BP;LGALS3;TIMP3;FOS;APOE;B2M;CD44;SOD1
increased neuron number MP:0008947	4/15	5.94441e-05	0.00433228	24.188	235.36	C3;NGFR;SPP1;SQSTM1
Purkinje cell degeneration MP:0000876	7/68	7.06059e-05	0.00494785	7.69166	73.5199	PRNP;EEF1A2;MAP1A;PSAP;NDUFA1;VIM;QKI
abnormal wound healing MP:0005023	4/16	7.83251e-05	0.0052855	22.1712	209.62	GSN;SPP1;HSPB1;PLEC
increased susceptibility to experimental autoimmune encephalomyelitis MP:0004799	6/51	0.000110636	0.00719926	8.91383	81.1984	CD74;NGFR;LGALS1;MBP;HLA-E;MAPK3
decreased susceptibility to type IV hypersensitivity reaction MP:0005616	6/52	0.000123508	0.00775969	8.71961	78.4696	CD74;ANXA5;EEF1A2;SPP1;APOE;CD44
increased circulating VLDL cholesterol level MP:0005145	4/19	0.000160987	0.00977725	17.7342	154.894	LPL;TXNIP;APOE;PLTP
abnormal nervous system morphology MP:0003632	7/79	0.00018349	0.0107844	6.51289	56.0327	PRNP;LGI4;STMN1;CANX;PSAP;VWA1;HSPG2
abnormal axonal transport MP:0004768	4/20	0.000198867	0.011323	16.625	141.693	DYNC1H1;PLP1;MBP;KLC1
increased or absent threshold for auditory brainstem response MP:0011967	11/200	0.00022771	0.0122052	3.92928	32.9566	APP;NGFR;FBXO2;PSAP;PMP22;MBP;MIF;APOE;CTSD;ACTG1;SOD1
decreased susceptibility to bacterial infection MP:0002411	6/58	0.000227759	0.0122052	7.71115	64.6751	SPP1;TIMP1;MIF;CD14;B2M;DCN
decreased myelin sheath thickness MP:0011731	3/9	0.00026249	0.0132849	33.1549	273.372	MPZ;PMP22;QKI
necrospermia MP:0009325	3/9	0.00026249	0.0132849	33.1549	273.372	CD59;PFDN5;QKI
abnormal gait MP:0001406	16/389	0.000281231	0.0138487	2.91916	23.868	NGFR;NDRG4;HSPG2;NDRG1;QKI;SOD1;BSCL2;UCHL1;MAP1B;MPZ;CANX;PSAP;PLP1;PMP22;MBP;FTL
abnormal dorsal root ganglion morphology MP:0000961	6/62	0.000329028	0.0156073	7.15889	57.4098	NGFR;UCHL1;LGALS1;PSAP;PMP22;NEFL
decreased fibroblast proliferation MP:0011704	7/87	0.000334074	0.0156073	5.85922	46.898	CIRBP;HSPB1;IGFBP7;MIF;CD44;MAPK3;SOD1
tonic seizures MP:0002826	4/23	0.000350803	0.0159791	13.9979	111.357	PSAP;MBP;CTSD;QKI
decreased circulating tumor necrosis factor level MP:0008554	5/42	0.000396507	0.0175558	9.00733	70.5528	C3;CLIC4;CD14;MIF;CD44
abnormal blood vessel physiology MP:0000249	4/24	0.000416023	0.0175558	13.2973	103.516	GPX3;SPP1;TIMP3;APOE
abnormal hippocampal mossy fiber morphology MP:0002761	4/24	0.000416023	0.0175558	13.2973	103.516	TUBA1A;CHL1;CKB;YWHAZ
increased interleukin-6 secretion MP:0008705	6/65	0.000425811	0.0175558	6.79384	52.7305	LGALS3;HSPB1;FOS;APOE;CD44;SOD1
increased liver weight MP:0002981	8/119	0.000434127	0.0175558	4.835	37.4334	BSCL2;FADS2;LGALS3;GPI;LDHA;PRDX5;NDFIP1;TXNIP
abnormal T-helper 1 physiology MP:0005465	5/43	0.00044323	0.0175558	8.76985	67.7157	CD74;AHNAK;MPZ;NME2;CD44
abnormal Schwann cell morphology MP:0001106	4/25	0.000489456	0.0185789	12.6634	96.5235	LGI4;MPZ;PSAP;PMP22
increased myocardial infarction size MP:0003037	4/25	0.000489456	0.0185789	12.6634	96.5235	CD74;APOD;MIF;SOD1
gliosis MP:0002183	6/67	0.000501763	0.0186574	6.57042	49.918	APP;PRNP;STMN1;EEF1A2;PLP1;SPARCL1
increased interleukin-4 secretion MP:0008699	5/45	0.000548988	0.0196129	8.33051	62.5407	AHNAK;SPP1;MBP;MIF;PPIA
lethality at weaning, complete penetrance MP:0011083	5/45	0.000548988	0.0196129	8.33051	62.5407	PSAP;PLP1;PMP22;DBI;CTSD
reticulocytosis MP:0002640	6/69	0.00058786	0.0205977	6.36119	47.321	GPI;PRDX2;LDHA;TPI1;PRDX1;CD59
decreased osteoclast cell number MP:0004985	5/46	0.000608466	0.0209175	8.12691	60.1763	C3;SPARC;SPP1;FOS;SQSTM1
abnormal sensory neuron morphology MP:0000965	3/12	0.000664871	0.0216321	22.0999	161.681	LGALS1;NEFH;PRPH
dysmyelination MP:0013438	3/12	0.000664871	0.0216321	22.0999	161.681	MPZ;PLP1;PMP22
increased fibrosarcoma incidence MP:0010363	3/12	0.000664871	0.0216321	22.0999	161.681	PRDX1;S100A4;MIF
oxidative stress MP:0003674	7/98	0.000687799	0.0219854	5.14807	37.4883	LGALS3;PRDX5;GPX4;FTH1;APOE;SQSTM1;SOD1
deafness MP:0001967	7/99	0.000730802	0.0229573	5.09185	36.7701	FBXO2;PSAP;PMP22;APOE;CTSD;ACTG1;SOD1
increased triglyceride level MP:0005317	4/28	0.000764697	0.0236149	11.0788	79.502	C3;FABP3;LPL;APOE
delayed wound healing MP:0002908	5/49	0.000816039	0.0247804	7.57165	53.8424	CLIC4;SPARC;SPP1;HSPB1;CD44
embryonic lethality between somite formation and embryo turning, complete penetrance MP:0011097	6/74	0.000853487	0.0248693	5.89196	41.6336	DYNC1H1;GPX4;MAP1B;GLUL;QKI;TPT1
abnormal lipid homeostasis MP:0002118	8/132	0.000862561	0.0248693	4.32523	30.5171	BSCL2;C3;FABP3;PSAP;TXNIP;LPL;APOD;APOE
increased lung weight MP:0005630	4/29	0.000876664	0.0248693	10.6351	74.8648	GPI;LDHA;PCSK1N;SPP1
abnormal enzyme/coenzyme activity MP:0005584	9/165	0.000887215	0.0248693	3.8747	27.2292	GPI;LDHA;TPI1;PSAP;GNAS;TIMP2;APOE;RNASE1;GAPDH
abnormal spatial learning MP:0001463	9/165	0.000887215	0.0248693	3.8747	27.2292	APP;NGFR;NDRG4;TIMP3;APOD;MBP;APOE;FOS;CKB
abnormal epididymal fat pad morphology MP:0006319	4/30	0.0009997	0.0271859	10.2256	70.6388	BSCL2;PRDX5;CEBPD;APOE
abnormal phospholipid level MP:0004777	4/30	0.0009997	0.0271859	10.2256	70.6388	BSCL2;PLP1;APOE;PLTP
amyloidosis MP:0000604	3/14	0.00107586	0.0288267	18.0799	123.569	CST3;APP;CTSB
limb grasping MP:0001513	11/245	0.00123801	0.0326908	3.16633	21.1962	AKAP12;NGFR;DYNC1H1;UCHL1;NDRG4;MPZ;PSAP;PMP22;NEFL;MBP;NDRG1
abnormal microglial cell morphology MP:0000136	4/32	0.00128128	0.0330667	9.49421	63.2304	CD81;SPP1;PLP1;CTSD
decreased anxiety-related response MP:0001364	9/174	0.00128855	0.0330667	3.66167	24.3656	C3;PCSK1N;TUBA1A;CHL1;PSAP;GNB1;FOS;TAC1;YWHAZ
abnormal cell physiology MP:0005621	11/248	0.00136459	0.0340722	3.12576	20.6204	APP;APLP2;LTBP4;PMP22;CALR;VIM;EEF2;HSPG2;SPTAN1;CD44;AP2M1
abnormal brain morphology MP:0002152	10/211	0.0013671	0.0340722	3.34517	22.0616	APP;PRNP;GPC1;STMN1;GNB1;PLP1;SERPING1;ID3;APOE;HSPG2
abnormal corpus callosum morphology MP:0000780	5/55	0.00138383	0.0340722	6.66102	43.8488	CD81;TUBB3;MAP1B;CANX;MBP
absent corpus callosum MP:0002196	4/33	0.00144097	0.0345454	9.16636	59.9703	APP;TUBB2B;TUBB3;MAP1B
motor neuron degeneration MP:0000938	4/33	0.00144097	0.0345454	9.16636	59.9703	DYNC1H1;UCHL1;EEF1A2;SOD1
abnormal glucose homeostasis MP:0002078	9/178	0.00150856	0.0356961	3.57427	23.2206	BSCL2;C3;FABP3;SCD;TSC22D3;GNAS;NDUFA1;TXNIP;APOE
abnormal locomotor coordination MP:0003312	4/34	0.00161403	0.0364131	8.86036	56.9634	UCHL1;MPZ;PLP1;HSPG2
abnormal endplate potential MP:0002914	3/16	0.0016188	0.0364131	15.2968	98.2984	UCHL1;EEF1A2;HSPG2
amyloid beta deposits MP:0003329	3/16	0.0016188	0.0364131	15.2968	98.2984	APP;PSAP;APOE
axonal dystrophy MP:0003225	3/16	0.0016188	0.0364131	15.2968	98.2984	UCHL1;KLC1;CTSD
weakness MP:0000746	6/84	0.00165345	0.0367389	5.13396	32.8825	ARHGDIA;MPZ;GNAS;DBI;CTSD;NDRG1
abnormal reproductive system physiology MP:0001919	4/35	0.00180102	0.0389228	8.57411	54.1832	FADS2;SCD;ARHGDIA;PSAP
impaired coordination MP:0001405	14/379	0.00185458	0.0389228	2.59306	16.3106	DYNC1H1;PRNP;COX6A1;KLC1;QKI;SOD1;UCHL1;MPZ;EEF1A2;PSAP;PLP1;PMP22;MBP;VIM
abnormal axon extension MP:0003651	5/59	0.00189701	0.0389228	6.16635	38.6475	NGFR;GAP43;MAP1B;NEFH;RTN4
impaired fertilization MP:0000242	5/59	0.00189701	0.0389228	6.16635	38.6475	PRNP;GPX4;ARHGDIA;CD9;PLTP
abnormal nervous system physiology MP:0003633	7/117	0.00193851	0.0389228	4.25473	26.5744	NDRG4;MPZ;PSAP;APOD;PFDN5;RTN4;ITM2B
abnormal basal ganglion morphology MP:0006007	3/17	0.001944	0.0389228	14.2035	88.6723	TUBB2B;TUBA1A;TUBB3
abnormal macrophage chemotaxis MP:0010760	3/17	0.001944	0.0389228	14.2035	88.6723	CD163;MPZ;SPP1
abnormal somatosensory cortex morphology MP:0000859	3/17	0.001944	0.0389228	14.2035	88.6723	TUBB2B;TUBA1A;TUBB2A
abnormal ventral spinal root morphology MP:0003993	3/17	0.001944	0.0389228	14.2035	88.6723	PSAP;NEFL;NEFH
embryonic lethality between implantation and placentation, complete penetrance MP:0011095	5/60	0.00204449	0.0404897	6.05393	37.4896	GPI;GPX4;RACK1;QKI;HSP90B1
astrocytosis MP:0003354	6/88	0.00209751	0.0410931	4.88253	30.1106	APP;PRNP;CANX;PSAP;PLP1;SOD1
impaired macrophage chemotaxis MP:0003799	4/37	0.00221906	0.0430121	8.05364	49.2132	LGALS3;SPP1;S100A4;PLEC
abnormal liver morphology MP:0000598	12/306	0.0023684	0.0454233	2.75028	16.627	C3;LGALS3;NDFIP1;GPC1;PSAP;NME2;SPP1;ID3;PEBP1;LPL;SPTBN1;SOD1
liver inflammation MP:0001860	7/122	0.00245802	0.0466511	4.0687	24.4464	C3;AKAP12;LGALS3;TIMP3;PPIA;CD44;SOD1
abnormal skin morphology MP:0002060	11/268	0.00250721	0.0470942	2.87955	17.2444	ITGB4;SCD;MPZ;LTBP4;GNAS;PEBP1;DBI;B2M;RNASE1;YWHAZ;COX6B1
increased susceptibility to bacterial infection MP:0002412	9/193	0.0026166	0.0486473	3.28037	19.5047	C3;LGALS3;C1QA;CLIC4;SCD;CLTC;SPP1;FOS;HLA-E
abnormal cerebral cortex morphology MP:0000788	8/158	0.00270157	0.0493667	3.57078	21.1173	PRNP;GAP43;TUBB2B;TUBA1A;TUBB2A;MAP1B;NEFL;APOE
abnormal stationary movement MP:0001388	3/19	0.00270948	0.0493667	12.4268	73.4546	LGALS3;UCHL1;QKI
