# Supplementary material for: Nageotte nodules in human DRG reveal neurodegeneration in painful diabetic neuropathy
Source: bioRxiv preprint, doi:10.1101/2024.08.22.609215, version 1 (2024-08-23)
Supplement: Supplementary Table 3 [file 609215_file09.xlsx]

## Sheet: Contents
Table of Contents	Sheet Name	Description
1	"all_genes"	Expression of all genes (in counts per million) in Nageotte Nodule clusters. "All Nodules (CPM)" is the cumulative expression across all nodule barcodes.
2	"prot_cod"	Subset of the previous table, excluding non-coding genes. Values were renormalized to one million per column after filtering
3	"no_mt_rpl"	Subset of the previous table, excluding mitochondrial and RPL ribosomal genes. Values were renormalized to one million per column after filtering
4	"neuronal_only"	Subset of the previous table, including only neuronally-enriched genes that meet the following criteria: 1) a difference of at least 0.1 when subtracting the the percentage of non-neuronal cells that express the gene from the percentage of neurons that express the gene, 2) at least 2-fold increase between the number of non-neurons that express the gene and the number of neurons that express the g…
5	"no_neuronal_genes"	Subset of "no_mt_rpl", excluding neuronally-enriched genes.
6	"cytokines"	Subset of "all_genes", showing expression of cytokines (derived from the PANTHER database with the addition of chemokines)

## Sheet: all_genes
Gene	Cluster0 (CPM)	Cluster1 (CPM)	Cluster2 (CPM)	Cluster3 (CPM)	Cluster4 (CPM)	All Nodules (CPM)
APOD	7082.87	4717.18	12926.5	4194.79	11182.1	7212.17
TMSB10	6115.82	6169.43	6514.03	6684.44	5399.49	6244.55
MT-CO3	4321.37	7452.08	4518.09	5720.16	9192.09	5937.34
FTH1	6128.61	5508.67	5586.83	5351.66	5799.15	5683.29
MT-CO2	4340.57	7154.09	4567.08	5551.96	6951.26	5606.27
MT-CO1	3644.33	6808.99	3863.06	4965.18	7282.01	5126.05
S100A6	5808.75	4268.43	4788.45	4972.88	4611.2	4959.37
VIM	6153.13	4055.24	5332.8	3414.12	6430.33	4927.18
FTL	4484.51	3655.96	6085.81	3421.83	4886.83	4340.06
TUBA1A	3045.11	5054.03	2511.26	6801.28	3169.69	4304.42
CLU	4097.47	3650.07	2915.89	4836.78	3381.92	3892.03
CD74	4898.2	3012.87	4109.83	2910.8	3927.65	3767.31
ACTB	3884.23	3533.46	3895.72	3447.51	3607.93	3673.91
EEF1A1	3502.52	2816.17	4588.85	2497.35	4760.04	3413.25
B2M	3748.82	2847.97	3921.12	2813.22	4159.18	3389.68
PSAP	3449.21	3416.86	2863.27	3538.67	2670.8	3287.38
GAPDH	2727.38	3961.01	2331.62	4279.53	2340.05	3272.72
TMSB4X	2858.53	3373.28	3032.02	3139.35	3561.07	3147.71
MT-ND4	2269.97	3654.78	2436.86	2647.58	5308.53	3035.63
ACTG1	2643.15	3127.12	2589.28	3581.04	2728.69	2971.54
NEFH	1666.5	5564.03	1629.42	2588.52	2304.22	2884.46
TUBA1B	2079.12	3445.13	1696.55	3973.94	2295.95	2798.54
GPX3	3080.3	2041.16	4309.42	1836.1	3018.09	2736.46
CST3	3355.38	2209.59	3113.67	2151.96	2408.96	2669.5
MT-ATP6	1942.65	3280.23	2121.14	2199.47	4503.71	2621.8
MT-CYB	1940.51	3237.83	2099.37	2142.97	4398.97	2583.86
NEFL	1354.09	5188.3	1199.38	2353.55	1992.77	2555.41
RPL41	2588.77	2197.82	3554.59	1945.24	3073.22	2552.82
S100A10	2327.55	2924.53	1576.79	3243.35	2034.11	2528.68
HLA-B	2828.67	2110.66	2883.23	2168.65	2756.25	2506.84
UCHL1	1606.79	3461.62	1275.59	3699.17	1808.1	2496.21
TUBB2A	1560.94	2922.18	1110.47	4112.61	1546.26	2391.32
MAP1B	1565.21	3160.1	1148.57	3360.19	1970.72	2332.4
APOE	2472.56	2400.4	1868.93	2092.9	1896.3	2214.29
RPLP1	2198.54	1949.29	2881.42	1662.76	2797.59	2188.42
LGALS1	1885.07	2402.76	1887.07	2420.32	2119.56	2155.95
MT-ND1	1484.17	2586.5	1629.42	1899.02	3833.94	2113.99
RPL13	2133.5	1696.06	3119.11	1467.6	2654.27	2088.13
PTGDS	2088.72	2223.73	1814.49	2060.8	1948.67	2057.38
MT-ND3	1462.85	2276.73	1589.5	1598.56	4139.89	1990.99
FCGBP	2316.89	1865.67	2208.24	1657.63	1780.54	1986.11
CD81	2198.54	1791.47	1887.07	1825.83	1764	1921.16
UBC	1957.57	1935.16	1760.06	2004.3	1799.83	1914.83
STMN2	1176.04	2363.89	860.07	3256.19	1455.3	1910.52
PRPH	1235.74	2315.6	909.061	3218.96	1356.07	1903.91
IFITM3	2293.43	1481.7	2582.02	1349.47	1921.11	1890.98
TPT1	1782.71	1631.28	2467.71	1450.91	2389.67	1843.28
RPS12	1868.01	1597.13	2709.04	1387.99	2009.31	1842.41
MT3	1957.57	2055.3	1366.31	1735.95	1780.54	1819.71
TUBB3	1194.16	2412.18	1001.6	2576.96	1358.83	1787.52
MT2A	2164.42	1456.97	1861.67	1394.41	1681.31	1721.14
NEFM	841.245	3690.12	843.739	1260.88	1284.41	1676.88
THY1	1217.62	2064.72	881.844	2411.33	1284.41	1645.27
S100B	1777.38	1912.78	1135.87	1576.74	1273.39	1611.36
RPL37A	1530.02	1446.36	2135.66	1316.09	2023.09	1609.06
CD59	1724.07	1687.82	1402.6	1459.89	1590.36	1591.24
RPS28	1563.07	1394.54	2146.55	1242.9	2009.31	1589.23
RPL28	1578	1350.96	2139.29	1272.43	1750.22	1561.07
RPS8	1501.23	1327.4	2133.84	1177.42	2064.43	1545.26
SPP1	1511.89	2166.01	1219.34	1002.79	1645.48	1525.14
HSP90AA1	1157.91	1809.13	974.383	1860.5	1515.94	1482.32
PMP22	1756.06	1235.53	1437.08	1250.6	1827.39	1472.84
SERPINA3	1615.32	1656.02	1506.03	943.731	1752.97	1471.98
RPL13A	1460.72	1180.18	2133.84	1084.97	1987.26	1469.68
RPL10	1558.81	1250.85	2014.09	1162.01	1402.93	1450.71
RPL32	1377.55	1233.18	1957.84	1108.08	1810.86	1419.1
RPL17	1514.03	1222.58	1839.9	1155.59	1535.23	1416.51
GSN	1686.75	1122.46	1633.04	1188.97	1507.67	1410.48
CTSB	1266.66	1539.41	1703.81	1230.06	1298.19	1397.54
SPARC	1708.08	1242.6	1389.9	1138.9	1502.16	1395.25
C1QB	1458.58	1262.62	1943.32	1052.87	1295.44	1379.73
CTSD	1285.86	1584.17	1271.96	1390.56	1262.36	1377.43
LGI4	1958.64	1023.53	1331.84	1159.44	1088.72	1361.62
RPS27	1330.64	1043.55	2115.7	887.235	1918.35	1346.96
RPL8	1387.15	1214.33	1711.07	1151.74	1408.44	1345.82
RPS27A	1355.16	1322.69	1720.14	1068.28	1380.88	1343.52
ANXA2	1181.37	1425.16	1075.99	1667.9	1240.31	1339.21
MYL6	1314.64	1376.87	1464.3	1244.18	1248.58	1330.87
RPL34	1229.35	1122.46	1946.95	1014.35	1780.54	1326.27
RPS15	1379.68	1188.42	1669.33	1096.53	1389.15	1316.5
HLA-DRA	1649.44	1044.73	1471.55	988.67	1549.01	1315.35
MT-ND2	971.323	1535.88	956.238	1088.82	2497.16	1292.07
ITM2B	1414.87	1306.2	1203.01	1250.6	1096.99	1284.89
RPLP2	1317.84	1080.06	1776.39	964.274	1609.65	1283.74
RPL37	1208.02	1104.8	1789.09	918.051	1890.79	1281.15
RPS2	1246.41	1030.59	1961.47	812.764	1502.16	1236.61
RPL36	1211.22	1005.86	1807.24	894.939	1656.51	1231.15
SERF2	1263.47	1182.53	1467.93	1160.72	1044.62	1230.29
IGFBP7	1276.26	889.255	2028.6	735.725	1430.49	1196.09
RPL11	1268.8	1080.06	1564.09	896.223	1240.31	1183.16
RPS26	1265.6	1088.31	1533.25	910.347	1168.65	1175.11
UBB	989.449	1459.32	932.65	1322.51	1028.08	1173.67
HSPB1	1131.26	1177.82	1083.25	1262.16	1108.01	1161.89
RPS11	1181.37	1001.15	1545.95	790.936	1532.47	1144.36
RPL19	1184.57	1015.28	1495.14	866.691	1314.73	1134.88
PPIA	983.051	1285	978.012	1336.63	975.712	1134.3
PKM	889.224	1476.99	749.386	1477.87	793.8	1132.29
ATP5F1E	1039.56	1209.62	992.528	1201.81	1204.48	1127.12
HLA-A	1190.96	928.123	1253.81	1047.73	1237.56	1109.59
CALM2	1049.16	1211.98	941.722	1187.69	1096.99	1107.86
RPL9	1176.04	915.167	1542.32	789.652	1309.22	1097.8
RPS6	1149.38	888.078	1585.87	744.713	1389.15	1089.18
RPL30	1100.34	969.347	1449.78	816.616	1325.76	1083.72
LPL	1230.41	1135.42	707.652	1133.76	986.737	1077.4
TUBB	943.601	1170.75	780.232	1432.93	840.656	1071.94
SNCG	812.457	1551.19	547.977	1377.72	719.381	1067.63
GNAS	940.403	1077.71	821.966	1412.39	917.831	1058.43
RPL18A	1048.09	883.366	1625.79	754.984	1256.85	1055.56
SELENOW	1011.84	1130.71	923.577	1233.91	807.581	1055.27
MIF	969.191	1197.84	1003.41	1077.27	956.418	1053.26
RPS19	1002.24	884.544	1594.94	780.664	1314.73	1050.39
HSP90AB1	808.192	1326.23	653.218	1341.77	989.493	1048.37
RPL39	959.595	882.188	1475.18	697.205	1549.01	1025.1
CD63	1095	1003.5	1108.66	901.359	1025.32	1024.23
RPL21	1007.57	895.144	1344.54	783.232	1314.73	1015.32
FAU	1064.08	926.946	1259.26	857.703	972.956	1005.84
YWHAH	736.755	1275.58	664.105	1353.32	785.531	999.806
RPS24	961.727	915.167	1246.56	756.268	1361.59	991.185
RPS18	923.343	806.808	1593.13	639.426	1424.98	989.748
RPL3	1023.57	838.609	1422.56	757.552	1096.99	989.748
HSPA8	767.676	1249.67	691.322	1262.16	763.481	983.425
RPL7	1022.5	736.139	1369.94	743.429	1369.86	981.413
RPL35	990.515	888.078	1230.23	816.616	1141.09	980.264
RPS13	1003.31	856.276	1284.66	799.924	1132.82	979.977
RPL29	976.654	843.32	1449.78	756.268	1066.67	979.114
RPS21	905.218	924.59	1300.99	748.565	1276.14	976.241
C1QA	1017.17	838.609	1406.23	681.797	1105.26	969.343
RPLP0	985.184	850.387	1266.52	711.329	1232.04	961.297
RPS29	939.337	775.007	1320.95	689.501	1458.06	957.848
RPS3A	997.978	839.787	1241.11	762.688	1063.91	952.1
RPS23	937.204	860.988	1428.01	695.921	1008.79	949.801
ENO1	1008.64	963.458	814.708	954.002	915.074	944.916
HLA-C	1080.08	868.055	932.65	934.743	724.893	935.432
RPS14	956.396	739.672	1320.95	707.477	1163.14	927.098
YWHAG	657.855	1302.67	537.09	1203.1	727.65	925.374
RPL7A	953.197	820.942	1277.4	724.169	972.956	923.075
TUBB2B	637.597	1062.4	435.478	1557.48	617.4	913.016
RPS17	969.191	658.402	1420.75	650.981	1154.87	913.016
SEMA3B	1389.28	674.892	965.311	652.265	700.087	911.005
A2M	936.138	871.588	1317.32	579.078	1008.79	908.418
UBA52	876.43	844.498	1037.89	873.111	948.149	900.946
SCD	957.462	1002.33	517.131	951.434	873.731	888.589
RPL15	828.45	736.139	1230.23	830.74	992.249	887.152
C3	947.866	946.969	896.36	752.416	837.9	884.278
CFL1	830.582	934.013	831.038	883.383	939.881	879.105
NEAT1	1206.96	601.867	1045.15	689.501	780.018	873.357
CALCA	519.247	745.561	420.962	1865.63	587.081	867.322
RPL31	806.06	785.607	1146.76	717.749	1110.77	867.035
SERPING1	992.647	687.848	1184.86	627.87	964.687	864.161
RPS15A	902.019	745.561	1259.26	611.178	945.393	859.85
RPL35A	833.781	726.716	1083.25	689.501	1108.01	843.47
NDRG2	1128.06	699.626	716.725	816.616	664.256	840.308
CRYAB	1141.92	626.601	776.603	740.861	851.681	838.297
TPI1	686.643	1061.22	658.661	954.002	691.818	833.986
TIMP2	848.708	747.917	671.363	983.534	870.974	828.526
OAZ1	760.212	836.253	740.313	978.398	727.65	821.054
RPS3	789	712.582	1222.97	597.054	1017.06	819.904
ATP1A1	670.65	1179	555.235	898.791	570.543	817.03
EIF1	846.576	752.628	841.925	817.9	757.968	807.259
CALM3	555.499	939.902	538.905	1169.71	702.843	799.5
H3F3B	1041.69	585.377	1036.08	606.042	727.65	799.213
PTMA	832.715	618.356	1141.32	490.483	1276.14	798.925
RPS16	832.715	619.534	1210.27	627.87	837.9	795.189
RPSA	831.649	710.226	1065.11	621.45	857.193	794.614
SOD1	620.538	1052.97	513.502	964.274	664.256	790.591
TXNIP	882.827	548.865	1293.73	500.755	942.637	787.142
AHNAK	1008.64	528.842	974.383	612.462	898.537	785.993
RPL12	753.815	617.179	1221.15	597.054	959.174	780.82
ATP6V0C	616.273	871.588	644.145	960.422	771.75	776.222
CAPNS1	648.26	833.898	651.403	961.706	680.793	767.6
RTN4	509.651	1071.82	448.18	1036.18	609.131	765.301
MALAT1	607.743	641.913	595.154	391.616	2475.11	760.416
ALDOC	623.737	1107.15	451.809	819.184	603.618	756.105
RTN3	530.976	1133.06	426.406	924.471	589.837	755.53
RPL36A	710.1	657.224	1123.17	576.51	917.831	754.381
HLA-DRB1	951.065	628.957	843.739	573.942	782.775	753.519
PEBP1	734.623	839.787	502.615	900.075	631.181	749.783
RPL4	783.669	709.049	938.093	626.586	733.162	749.495
RACK1	722.895	676.07	1025.19	617.598	851.681	749.208
GLUL	760.212	571.243	1056.04	602.19	926.099	742.885
RPL18	806.06	608.934	1010.67	627.87	711.112	740.586
UQCR11	663.187	818.586	667.734	848.715	584.325	735.126
COX4I1	615.207	921.057	611.484	823.036	595.35	733.689
EEF2	721.828	670.181	894.545	730.589	647.718	730.815
IFITM2	868.966	524.131	1036.08	529.003	738.675	721.619
ATP5F1B	577.889	926.946	595.154	807.628	617.4	721.332
RPL27A	707.968	603.045	983.455	526.435	1008.79	716.734
YWHAZ	587.485	829.186	462.696	989.954	581.568	716.159
HINT1	604.545	929.301	528.018	820.468	507.15	709.836
ENO2	538.439	948.146	479.026	928.323	471.318	709.262
RPS10	785.801	625.423	939.908	521.299	738.675	706.963
ATP5ME	669.584	758.517	616.928	783.232	655.987	706.963
RPL6	661.054	680.781	869.142	545.695	975.712	705.813
NDRG1	911.615	583.022	774.789	606.042	531.956	701.79
RPS25	710.1	612.467	983.455	487.915	901.293	699.778
RPL38	663.187	653.691	865.513	525.151	1011.54	698.341
GNG3	484.062	981.125	393.745	954.002	498.881	697.766
CD99	735.689	709.049	567.936	824.32	471.318	694.892
CALM1	553.366	803.274	522.574	865.407	587.081	682.822
KLC1	497.923	879.833	402.818	912.915	542.981	673.626
RTN1	362.514	922.234	313.907	1138.9	432.731	672.477
RPL26	626.935	658.402	876.4	505.891	862.706	671.614
ADIRF	820.987	537.087	747.571	522.583	785.531	669.603
RPS9	634.399	558.287	945.351	529.003	887.512	667.878
C1R	809.258	542.976	894.545	442.976	727.65	667.304
SPTAN1	535.241	892.789	424.591	838.444	476.831	666.729
TOMM7	741.02	691.381	609.67	595.77	653.231	666.442
RPL5	652.524	553.576	925.392	581.646	730.406	663.855
RPS4X	648.26	584.2	965.311	557.25	644.962	662.131
SPARCL1	588.551	617.179	894.545	495.619	884.756	654.084
RPL22	657.855	595.978	858.255	539.275	667.012	648.911
RPS7	659.988	617.179	910.876	476.359	642.206	646.325
ELOB	633.332	652.513	653.218	644.562	625.668	642.876
PFN1	618.405	650.158	762.087	564.954	675.281	642.876
SPTBN1	710.1	625.423	546.163	631.722	644.962	639.14
DCN	546.969	438.15	1199.38	400.604	934.368	631.381
EEF1G	632.266	610.112	740.313	518.731	724.893	628.22
COX7C	487.261	813.875	486.284	737.009	509.906	625.058
NME2	607.743	643.091	589.71	688.217	545.737	625.058
MIA	769.808	591.266	671.363	442.976	647.718	624.771
RPL23	575.757	581.844	762.087	450.679	983.981	621.322
NDUFA4	498.989	823.297	488.099	668.957	540.225	618.736
APP	599.214	633.668	504.429	757.552	482.343	615.862
RPS5	605.611	505.285	919.948	480.211	722.137	615
C1S	782.603	488.796	787.49	444.26	573.3	614.138
PRNP	545.903	697.27	357.455	869.259	438.243	614.138
SKP1	562.962	678.425	440.922	744.713	548.493	610.977
PRDX1	583.22	701.982	518.945	615.03	595.35	610.402
RPL27	623.737	512.352	818.337	440.408	837.9	608.678
HLA-DRB5	816.722	494.685	655.032	432.704	633.937	607.528
PRDX5	508.585	700.804	468.139	762.688	518.175	606.953
RHOA	646.127	532.375	644.145	532.855	755.212	604.079
RPL10A	581.088	553.576	825.595	444.26	730.406	598.044
PLP1	791.132	522.953	479.026	529.003	595.35	597.182
RPL23A	543.77	538.264	825.595	445.544	807.581	592.584
IFI27	657.855	507.641	787.49	476.359	518.175	586.549
LDHA	497.923	657.224	486.284	720.317	465.806	581.376
SH3BGRL3	471.268	636.024	533.461	703.625	526.443	579.077
AKAP12	496.857	627.779	395.56	738.293	554.006	572.755
FADS2	648.26	577.133	366.528	629.154	512.662	567.869
HLA-E	619.472	494.685	740.313	449.395	578.812	565.857
CD9	774.073	446.394	482.655	463.519	650.475	565.57
RPL24	549.101	517.064	742.128	425	716.625	561.547
DPYSL2	500.055	579.488	433.664	707.477	537.468	559.248
NORAD	498.989	593.622	419.148	670.241	567.787	554.937
TAGLN2	508.585	489.974	500.8	731.873	501.637	552.063
APLP2	498.989	613.645	477.212	630.438	465.806	549.477
C1QC	553.366	534.731	753.015	416.012	542.981	548.614
EEF1A2	363.58	824.475	313.907	668.957	416.194	542.005
ARHGDIA	486.195	498.219	486.284	627.87	551.25	527.635
MAP1A	359.315	744.383	273.989	680.513	493.368	525.624
RPL14	525.645	474.662	669.548	472.507	526.443	524.187
GABARAP	551.234	460.528	553.421	503.323	603.618	524.187
TXN	383.838	780.896	348.383	582.93	424.462	523.9
CSRP1	598.147	498.219	533.461	444.26	542.981	523.325
COX6C	465.937	591.266	401.003	649.697	427.219	523.325
SRP14	502.188	550.043	500.8	581.646	424.462	523.325
DHCR24	496.857	541.798	322.98	726.737	377.606	519.301
MPZ	633.332	421.66	593.339	418.58	540.225	517.577
RABAC1	494.724	555.932	480.841	589.35	383.119	517.002
AP2M1	456.341	546.509	428.22	679.229	388.631	516.715
CD14	564.028	436.972	704.023	414.728	496.125	514.703
CHCHD2	451.009	586.555	408.261	609.894	421.706	509.818
DYNC1H1	389.169	648.98	301.206	717.749	347.287	507.806
PLTP	524.578	350.991	1074.18	273.489	471.318	507.519
PGAM1	395.566	663.114	371.971	611.178	402.412	506.082
NDRG4	313.468	738.494	203.223	748.565	391.387	505.22
ATP6V0B	426.487	573.599	444.551	598.338	418.95	502.921
S100A11	567.227	413.415	569.751	464.803	504.393	500.621
TUBB4B	388.103	738.494	322.98	575.226	333.506	499.472
RPS20	497.923	420.482	674.992	328.701	738.675	494.299
TIMP1	568.293	388.681	763.902	336.405	471.318	493.437
APOC1	556.565	544.154	361.084	458.383	479.587	492.575
S100A13	453.142	459.35	371.971	649.697	507.15	491.425
UQCRQ	429.685	566.532	462.696	535.423	399.656	488.839
AHNAK2	335.858	718.471	299.391	607.326	366.581	487.402
TSC22D3	520.314	429.905	453.623	496.903	556.762	486.252
FASN	448.877	558.287	303.02	635.574	330.75	481.942
GPI	349.719	587.733	328.423	676.661	374.85	480.217
ANXA6	393.434	581.844	364.713	615.03	344.531	479.355
CALR	505.387	439.327	642.331	369.788	454.781	475.332
STAB1	570.426	333.324	782.047	368.504	322.481	475.044
GSTP1	469.135	458.173	540.719	459.667	452.025	473.895
STMN1	470.201	422.838	330.238	594.486	537.468	471.308
COX6A1	383.838	527.664	368.342	559.818	465.806	464.411
COX5B	391.301	554.754	482.655	475.075	383.119	463.549
ACOT7	347.587	581.844	281.246	635.574	374.85	461.537
EIF4A1	481.93	369.836	577.009	442.976	454.781	458.089
SARAF	389.169	524.131	344.754	585.498	361.069	456.077
ABCA8	582.154	376.903	428.22	382.628	476.831	452.054
PPDPF	522.446	394.57	408.261	472.507	421.706	451.479
ITGB4	614.141	343.924	509.873	346.677	402.412	449.755
TIMP3	493.658	408.704	486.284	426.284	421.706	449.18
PGK1	387.037	502.93	375.6	535.423	405.169	448.605
DDX5	541.638	363.947	440.922	466.087	369.337	447.456
MORF4L1	394.5	508.819	424.591	413.444	545.737	447.168
TLE5	437.149	459.35	457.252	481.495	355.556	447.168
DBI	479.797	461.706	402.818	425	410.681	443.72
HTRA1	427.553	590.089	313.907	432.704	361.069	443.432
GUK1	420.089	504.108	353.826	502.039	369.337	443.145
PRDX2	371.043	601.867	328.423	494.335	314.212	442.283
CD163	432.884	327.434	782.047	291.465	540.225	441.995
NGFR	411.559	508.819	381.044	509.743	308.7	441.708
EDF1	408.361	440.505	401.003	549.546	352.8	440.846
IGFBP4	453.142	362.769	765.716	261.933	482.343	440.846
LTBP4	642.928	295.633	531.647	326.133	363.825	440.558
VAT1	376.374	452.284	275.803	638.142	391.387	439.121
NACA	455.274	405.171	491.728	382.628	509.906	438.259
PCSK1N	335.858	493.507	221.368	731.873	272.869	438.259
DKK3	438.215	478.196	315.722	507.175	374.85	437.397
DYNLL2	364.646	546.509	257.658	563.67	369.337	437.11
DYNLL1	437.149	454.639	342.939	467.371	471.318	436.822
TMA7	443.546	440.505	426.406	436.556	421.706	436.248
NDUFA13	448.877	424.016	435.478	431.42	443.756	436.248
SELENOP	484.062	358.058	562.493	305.589	576.056	435.385
CHL1	539.505	310.945	364.713	459.667	509.906	435.098
SERINC1	371.043	467.595	308.464	526.435	512.662	434.236
BSCL2	320.931	559.465	248.586	604.758	344.531	433.661
CKB	438.215	533.553	339.31	422.432	355.556	433.661
SYT11	396.632	515.886	246.771	543.127	363.825	431.362
CD151	432.884	427.549	426.406	464.803	369.337	431.075
CANX	440.347	413.415	422.777	416.012	487.856	430.5
SELENOM	521.38	371.014	428.22	364.652	474.075	429.925
HLA-DPB1	530.976	381.614	464.51	297.885	509.906	429.638
HSPG2	617.339	266.188	558.864	320.997	350.044	428.201
GPX4	479.797	440.505	482.655	353.096	344.531	428.201
CLIC4	589.618	335.679	406.447	317.145	496.125	427.914
CIRBP	533.108	391.037	424.591	401.888	275.625	425.04
HNRNPA2B1	507.519	342.746	498.986	372.356	396.9	424.178
ID3	552.3	293.278	671.363	259.365	366.581	423.028
COX7A2	401.964	477.018	344.754	484.063	333.506	422.453
MBP	460.605	347.457	459.067	396.752	498.881	422.453
ATP5MD	389.169	458.173	321.165	520.015	369.337	422.453
EEF1D	495.791	356.88	584.267	294.033	407.925	421.591
PFDN5	437.149	379.259	537.09	376.208	391.387	420.442
LGALS3	541.638	333.324	495.357	299.169	443.756	419.005
RARRES2	544.837	358.058	430.035	380.06	289.406	417.568
LAPTM5	479.797	336.857	524.389	350.528	391.387	413.832
UQCR10	362.514	489.974	366.528	453.247	355.556	413.832
GTF2I	404.096	434.616	371.971	432.704	407.925	413.257
PLEC	495.791	369.836	420.962	351.812	413.437	412.395
RNASEK	395.566	458.173	317.536	466.087	377.606	412.395
GRINA	385.97	513.53	342.939	392.9	388.631	412.107
UBL5	394.5	419.304	417.333	448.112	341.775	410.671
GNB1	368.911	459.35	330.238	508.459	286.65	407.509
NDFIP1	329.461	458.173	292.133	543.127	352.8	405.21
TAC1	215.376	307.411	190.522	897.507	394.144	405.21
MARCKS	449.943	371.014	404.632	335.121	512.662	404.348
HSP90B1	429.685	349.813	524.389	331.269	435.487	403.773
CD44	420.089	362.769	312.093	480.211	380.362	398.313
MAP1LC3A	318.799	451.106	303.02	559.818	278.381	398.313
QKI	476.599	292.1	402.818	346.677	534.712	396.876
TMEM176B	454.208	398.104	295.762	433.988	316.969	396.589
CLTC	326.262	471.129	301.206	468.655	391.387	396.301
MYL9	455.274	276.788	656.847	255.513	429.975	396.301
MZT2B	403.03	405.171	399.189	394.184	350.044	395.439
VWA1	568.293	295.633	406.447	308.157	350.044	395.152
PCBP2	388.103	409.882	381.044	353.096	479.587	394.002
RNASE1	358.249	263.832	832.852	249.094	429.975	393.428
GAP43	279.349	401.637	234.07	665.105	316.969	392.278
NDUFS5	353.984	472.306	315.722	414.728	366.581	391.703
HLA-DPA1	424.354	330.968	457.252	350.528	424.462	390.266
EIF4G2	371.043	367.48	377.415	450.679	380.362	389.979
COX6B1	396.632	465.24	284.875	423.716	281.137	389.692
CNN3	457.407	314.478	508.058	255.513	496.125	389.404
FOS	448.877	313.301	451.809	351.812	388.631	388.255
ANXA5	426.487	371.014	357.455	362.084	413.437	386.243
GPC1	577.889	277.966	390.116	286.329	347.287	385.668
VMP1	597.081	255.587	433.664	276.057	297.675	384.806
LGALS3BP	416.891	330.968	361.084	401.888	424.462	384.519
CEBPD	481.93	299.167	475.397	290.181	394.144	384.231
PPP2R1A	302.805	448.75	319.351	507.175	278.381	384.231
PRUNE2	259.091	591.266	165.119	499.471	303.187	383.657
RHOC	464.87	314.478	430.035	337.689	322.481	379.346
RGCC	508.585	360.413	261.287	368.504	292.162	379.346
NDUFA1	326.262	462.884	301.206	462.235	253.575	378.484
ATP1B1	272.951	577.133	183.264	476.359	264.6	377.621
FABP3	214.309	500.574	203.223	603.474	289.406	377.334
FABP7	411.559	498.219	161.49	354.38	377.606	376.759
SAT1	400.897	329.79	431.849	363.368	366.581	376.472
SQSTM1	433.95	373.369	384.673	324.849	322.481	375.322
MAPK3	323.064	426.371	246.771	502.039	311.456	375.035
UQCRB	303.872	438.15	348.383	391.616	407.925	374.173
EDIL3	373.176	411.06	181.449	490.483	330.75	373.885
GPM6B	457.407	314.478	326.609	303.021	512.662	373.023
FBXO2	279.349	555.932	221.368	457.099	234.281	372.736
ATP5F1A	349.719	462.884	292.133	395.468	289.406	372.161
S100A4	373.176	342.746	489.913	295.317	407.925	370.437
CDH19	474.466	296.811	313.907	336.405	427.219	369.862
MYL12B	324.13	375.725	328.423	453.247	341.775	368.138
REEP5	254.826	522.953	255.844	426.284	341.775	367.85
GHITM	293.209	471.129	246.771	454.531	314.212	367.563
HNRNPK	401.964	341.568	397.374	359.516	305.944	366.988
COPS9	348.653	398.104	317.536	425	283.894	366.126
SLC44A2	476.599	316.834	315.722	372.356	239.794	364.114
MAP4	359.315	366.303	292.133	441.692	311.456	363.827
NPC2	395.566	330.968	386.487	309.441	429.975	362.678
EZR	396.632	368.658	292.133	374.924	330.75	361.528
FN1	532.042	239.098	446.365	218.278	366.581	359.516
HAMP	436.082	353.346	304.835	349.245	281.137	359.516
ATP5MF	303.872	475.84	275.803	404.456	261.844	359.516
MTCH1	328.395	361.591	324.794	442.976	305.944	359.229
MT1E	509.651	288.566	401.003	236.254	333.506	358.942
PABPC1	302.805	294.455	433.664	260.649	749.7	358.654
VAT1L	220.707	471.129	150.603	577.794	294.919	358.367
BSG	381.705	379.259	370.157	303.021	350.044	358.367
POLR2L	327.328	322.723	379.229	423.716	344.531	357.792
PRIMA1	488.327	313.301	277.617	344.109	275.625	357.792
LDHB	314.534	438.15	286.69	368.504	358.312	356.93
CADM3	380.639	372.192	288.504	390.332	275.625	355.206
TPPP3	240.965	446.394	217.739	525.151	267.356	353.769
COL1A2	400.897	274.432	395.56	317.145	429.975	353.481
LAMP1	441.414	302.7	373.786	310.725	305.944	353.481
C4orf48	292.143	431.083	259.473	425	305.944	352.044
PEA15	296.408	336.857	275.803	521.299	281.137	351.757
GNB2	384.904	340.39	373.786	335.121	294.919	351.757
FLNA	419.023	276.788	509.873	250.377	330.75	351.757
BEX3	294.276	403.993	273.989	451.963	275.625	351.182
RHOQ	291.077	399.282	192.336	487.915	336.262	350.607
YWHAE	323.064	343.924	268.545	427.568	385.875	349.458
TMBIM6	378.507	310.945	382.858	292.749	424.462	348.308
DSTN	249.495	402.815	313.907	431.42	350.044	348.308
MGST3	301.739	458.173	254.029	403.172	234.281	348.021
SNHG29	337.991	303.878	477.212	320.997	339.019	348.021
HMGCS1	231.369	426.371	163.304	544.411	319.725	347.446
KIF1A	261.223	402.815	232.255	485.347	314.212	346.871
TALDO1	378.507	358.058	317.536	341.541	286.65	346.009
FDPS	281.481	381.614	223.183	498.187	286.65	345.722
NDUFA11	357.182	335.679	317.536	372.356	316.969	344.86
GDI1	301.739	387.503	299.391	423.716	256.331	344.86
P4HB	410.493	296.811	391.931	272.205	358.312	343.423
MAP1LC3B	254.826	465.24	234.07	432.704	259.087	343.135
PCP4	208.978	458.173	128.829	597.054	201.206	343.135
PLD3	356.116	353.346	288.504	399.32	237.037	341.986
YWHAQ	306.004	374.547	254.029	445.544	267.356	341.699
SUN2	380.639	310.945	344.754	326.133	339.019	341.411
HSPA5	375.308	332.146	379.229	300.453	303.187	341.124
CYB5R3	314.534	372.192	297.577	377.492	319.725	340.549
PLPP1	425.42	307.411	283.061	317.145	327.994	339.687
ITGB8	530.976	213.186	348.383	222.13	369.337	338.537
DDX17	415.824	269.721	390.116	305.589	292.162	338.537
CTNNA1	438.215	297.989	310.278	299.169	300.431	338.25
ATP5MPL	277.216	406.348	266.731	403.172	305.944	338.25
BEX1	221.773	414.593	159.675	575.226	206.719	336.526
IDS	285.746	359.236	212.296	460.951	333.506	336.238
COX8A	330.527	367.48	292.133	362.084	283.894	335.664
KIF5A	234.568	418.127	174.191	536.707	209.475	334.801
KIF3C	244.164	432.261	185.078	481.495	245.306	333.939
HSPA12A	310.269	428.727	259.473	342.825	267.356	333.939
SLC25A3	283.614	398.104	317.536	331.269	341.775	333.652
DST	345.454	323.901	201.409	382.628	418.95	333.364
SRRM2	468.069	236.742	328.423	315.861	256.331	333.364
ARPC1B	355.05	299.167	381.044	291.465	369.337	332.79
GNAI2	383.838	272.077	393.745	274.773	372.094	332.502
CSDE1	348.653	320.367	257.658	368.504	347.287	331.64
HNRNPA1	350.785	289.744	424.591	254.229	391.387	330.203
SNRPN	242.031	449.928	172.377	445.544	270.112	330.203
CRIP2	309.203	346.28	366.528	326.133	292.162	329.341
PSMD8	295.342	418.127	205.038	408.308	228.769	329.341
CNP	397.699	313.301	313.907	282.477	303.187	328.192
MICALL2	468.069	256.765	266.731	322.281	231.525	327.329
TSPO	355.05	285.033	397.374	274.773	358.312	327.042
RTL8C	275.084	360.413	223.183	444.26	286.65	326.755
AP2S1	283.614	376.903	268.545	380.06	289.406	326.18
NDUFB2	312.401	334.501	292.133	353.096	322.481	324.743
SAMHD1	374.242	308.589	295.762	255.513	427.219	324.743
ATP5IF1	223.905	482.907	201.409	399.32	237.037	324.168
EXTL1	433.95	268.543	283.061	314.577	231.525	321.869
FXYD1	433.95	263.832	330.238	250.377	303.187	321.294
SLC25A6	308.137	308.589	370.157	320.997	311.456	321.294
MAPK8IP1	232.435	349.813	270.36	458.383	264.6	321.007
DCTN2	258.024	355.702	250.4	417.296	300.431	320.72
MLLT11	218.574	359.236	150.603	558.534	234.281	319.857
NEDD8	292.143	330.968	272.174	394.184	272.869	319.283
VGF	210.045	318.012	148.788	575.226	286.65	316.409
S100A8	311.335	286.211	531.647	225.982	248.062	314.397
TECR	254.826	432.261	295.762	273.489	305.944	314.11
NCAM1	344.388	292.1	212.296	382.628	292.162	313.822
RHOB	325.196	262.654	424.591	304.305	245.306	312.673
CD24	218.574	393.392	103.426	509.743	253.575	311.811
NAA38	293.209	349.813	292.133	320.997	275.625	311.236
RPL36AL	324.13	299.167	328.423	291.465	305.944	309.512
IFI27L2	344.388	308.589	303.02	291.465	267.356	309.224
H1FX	328.395	228.497	437.293	277.341	319.725	308.937
MXRA7	256.958	293.278	215.925	462.235	286.65	308.362
ATP6AP1	293.209	318.012	232.255	372.356	303.187	308.362
CLSTN1	304.938	348.635	243.142	342.825	242.55	307.787
LAMTOR4	327.328	310.945	333.867	305.589	214.987	307.787
TMEM258	352.918	279.144	310.278	290.181	292.162	307.787
PTMS	336.924	233.209	370.157	279.909	366.581	307.213
JUND	313.468	310.945	283.061	340.257	245.306	306.925
PCBP1	303.872	314.478	313.907	261.933	374.85	306.063
OST4	315.6	293.278	330.238	285.045	305.944	304.626
EIF4A2	269.753	312.123	244.957	367.22	327.994	304.051
YWHAB	232.435	360.413	241.328	338.973	372.094	303.477
RAB6B	238.832	392.215	152.417	431.42	214.987	303.189
IGHA1	649.326	111.893	101.612	358.232	44.1	303.189
MT-ND5	211.111	392.215	250.4	247.81	531.956	303.189
IFI6	328.395	236.742	381.044	261.933	361.069	302.902
TSPAN3	275.084	348.635	246.771	328.701	297.675	302.902
NDUFA3	285.746	355.702	263.102	301.737	286.65	302.902
ATF4	366.778	256.765	270.36	344.109	206.719	302.902
INF2	360.381	273.255	281.246	300.453	256.331	302.327
AQP1	288.945	266.188	488.099	229.834	292.162	302.04
DYNLRB1	291.077	327.434	266.731	304.305	314.212	301.465
PARK7	310.269	299.167	277.617	313.293	272.869	299.166
NCDN	302.805	287.388	214.11	412.16	201.206	298.878
L1CAM	348.653	257.943	154.232	423.716	217.744	298.878
WBP2	259.091	336.857	215.925	368.504	283.894	298.304
SLC38A2	282.547	297.989	321.165	300.453	286.65	296.867
SOX10	412.626	215.541	297.577	255.513	259.087	295.143
CFH	306.004	171.962	626	137.387	388.631	294.855
GABARAPL2	266.554	322.723	192.336	421.148	187.425	294.855
SPOCK2	184.455	398.104	159.675	436.556	231.525	293.993
NPDC1	300.673	287.388	335.681	308.157	192.937	293.418
S100A9	277.216	223.786	558.864	172.054	336.262	291.407
SOD2	318.799	288.566	304.835	240.106	316.969	291.407
HLA-DQB1	379.573	216.719	350.197	197.734	336.262	289.97
SCRG1	299.607	301.522	203.223	336.405	267.356	289.682
TBCB	252.693	332.146	263.102	318.429	261.844	289.395
OLFM1	239.899	362.769	174.191	385.196	206.719	288.533
TUBA4A	199.382	440.505	176.006	349.245	198.45	287.958
CLIC1	290.011	302.7	299.391	285.045	231.525	287.383
EEF1B2	253.759	255.587	370.157	264.501	361.069	286.234
ARF1	286.812	310.945	270.36	272.205	272.869	285.371
FADS3	372.109	230.853	263.102	296.601	198.45	285.371
TAGLN	263.355	149.583	624.186	178.474	369.337	284.797
MEG3	244.164	274.432	170.562	494.335	137.812	284.797
BCAP31	264.422	339.213	244.957	300.453	231.525	284.222
RAC1	263.355	283.855	290.319	282.477	330.75	283.935
DDIT4	360.381	215.541	321.165	268.353	217.744	283.36
CHCHD10	272.951	380.436	228.626	264.501	206.719	283.36
ARL6IP5	239.899	323.901	232.255	310.725	316.969	283.072
HSBP1	265.488	252.054	290.319	345.393	250.819	282.498
ATP6V0A1	229.237	333.324	226.812	355.664	226.012	282.21
ADD1	302.805	265.01	283.061	297.885	228.769	281.635
RNF187	255.892	325.079	195.965	314.577	294.919	280.486
DCTN1	214.309	346.28	221.368	340.257	256.331	280.199
SLC15A3	360.381	266.188	268.545	213.142	267.356	280.199
FIS1	264.422	292.1	281.246	287.613	267.356	279.336
ATP5F1D	259.091	332.146	241.328	297.885	223.256	279.049
ATP13A2	202.581	360.413	177.82	401.888	170.887	278.474
EPB41L3	167.396	380.436	165.119	419.864	195.694	278.474
STMN3	206.846	386.325	168.748	347.961	226.012	278.187
NDUFB1	260.157	300.345	263.102	290.181	267.356	277.9
DUSP1	293.209	223.786	335.681	256.797	314.212	277.037
NDUFB7	248.428	305.056	293.948	277.341	256.331	276.75
SFRP5	352.918	233.209	250.4	263.217	245.306	276.175
CAP1	270.819	295.633	250.4	283.761	264.6	275.888
ACADVL	306.004	269.721	301.206	258.081	209.475	275.6
ADH1B	296.408	175.495	426.406	199.018	385.875	275.026
VAMP2	239.899	253.232	217.739	396.752	242.55	275.026
LRP1	329.461	208.474	370.157	224.698	248.062	274.451
GAS7	355.05	216.719	255.844	234.97	314.212	274.451
HCFC1R1	269.753	302.7	228.626	291.465	248.062	273.876
TTYH1	332.659	268.543	188.707	285.045	239.794	273.876
TMED10	350.785	235.564	279.432	209.29	278.381	272.152
CAPZB	278.282	288.566	248.586	291.465	209.475	271.864
TUBB4A	186.588	328.612	159.675	413.444	226.012	271.864
PSMC5	230.303	299.167	252.215	323.565	223.256	270.715
PHC2	368.911	206.119	297.577	209.29	256.331	270.428
FCER1G	306.004	233.209	382.858	213.142	217.744	270.428
SNX3	267.62	285.033	279.432	260.649	250.819	270.428
NFE2L1	229.237	309.767	235.884	338.973	190.181	270.428
C9orf16	222.839	299.167	210.481	342.825	253.575	269.565
FKBP5	316.666	222.608	281.246	213.142	358.312	269.278
NPTX2	312.401	228.497	194.151	329.985	237.037	269.278
COX7B	203.647	363.947	224.997	272.205	275.625	268.991
TSPAN8	269.753	287.388	154.232	332.553	259.087	268.703
CLIP3	256.958	280.322	194.151	358.232	187.425	268.128
PSMD2	249.495	300.345	214.11	331.269	184.669	267.841
ATP6V0D1	199.382	350.991	170.562	320.997	278.381	267.266
COL18A1	302.805	214.364	348.383	223.414	270.112	267.266
SARS	205.78	338.035	219.554	338.973	173.644	266.692
INSIG1	151.403	338.035	119.757	431.42	267.356	266.692
PFKP	182.323	406.348	165.119	299.169	242.55	266.692
PTGES3	251.627	294.455	232.255	285.045	250.819	266.404
BTF3	283.614	257.943	299.391	227.266	270.112	265.829
MAP2K2	255.892	285.033	210.481	315.861	214.987	264.967
ATP5MG	244.164	290.922	272.174	265.785	239.794	264.393
ANK2	180.191	336.857	121.571	425	181.912	264.105
PLEKHB1	317.732	250.876	176.006	278.625	250.819	263.243
PCMT1	201.515	368.658	156.046	305.589	245.306	262.956
H3F3A	303.872	226.142	348.383	173.338	303.187	262.668
COMMD6	251.627	236.742	339.31	247.81	267.356	262.668
ROMO1	298.541	259.121	286.69	236.254	195.694	262.381
MRFAP1	246.296	280.322	214.11	272.205	311.456	262.093
TMEM176A	288.945	275.61	185.078	276.057	237.037	260.944
GRN	246.296	222.608	399.189	196.45	316.969	260.944
JUN	339.057	196.696	250.4	261.933	214.987	260.082
HMGB1	272.951	254.409	270.36	214.426	319.725	259.794
LMNA	337.991	206.119	266.731	205.438	286.65	259.507
ATP5MC3	213.243	336.857	201.409	249.094	305.944	259.22
PINK1	199.382	305.056	214.11	333.837	209.475	258.645
EGFL8	321.997	208.474	290.319	224.698	237.037	258.645
ATP6V1E1	205.78	343.924	177.82	313.293	201.206	258.645
ATOX1	258.024	250.876	223.183	323.565	181.912	257.495
MYH9	256.958	227.32	379.229	192.598	283.894	257.495
CAVIN1	268.687	215.541	312.093	213.142	336.262	257.208
TAPBP	291.077	227.32	277.617	246.526	228.769	256.921
HNRNPC	274.018	250.876	250.4	231.118	289.406	256.633
AATK	355.05	190.807	234.07	261.933	176.4	256.346
LAPTM4A	265.488	204.941	324.794	200.302	366.581	256.058
PIN1	227.104	345.102	215.925	261.933	170.887	256.058
PFKL	285.746	226.142	324.794	234.97	190.181	256.058
CCNI	223.905	259.121	186.893	301.737	333.506	255.484
FLOT1	242.031	268.543	226.812	288.897	228.769	255.196
SNHG25	300.673	182.562	352.012	209.29	256.331	254.909
PSMB1	271.885	257.943	219.554	261.933	239.794	254.621
TSC22D4	254.826	287.388	243.142	224.698	259.087	254.621
RAN	227.104	297.989	214.11	281.193	228.769	254.621
COX5A	198.316	382.792	190.522	252.945	201.206	254.621
FSTL1	274.018	187.274	297.577	259.365	278.381	253.759
SSR4	299.607	208.474	319.351	214.426	226.012	253.759
PSMB4	218.574	276.788	221.368	291.465	256.331	253.472
ANXA1	317.732	199.052	292.133	204.154	261.844	253.472
REEP1	176.992	336.857	152.417	344.109	212.231	253.185
LAMTOR1	229.237	246.165	266.731	279.909	253.575	253.185
NAP1L1	220.707	233.209	226.812	264.501	399.656	253.185
PRKAR1A	220.707	269.721	226.812	279.909	278.381	252.897
SNRNP70	321.997	221.43	273.989	231.118	159.862	252.61
SEPTIN7	236.7	290.922	176.006	273.489	270.112	252.035
ADGRG1	271.885	267.366	219.554	245.242	226.012	251.748
ADCYAP1	122.615	339.213	132.458	423.716	190.181	251.46
CDC37	256.958	254.409	234.07	268.353	220.5	251.46
SNRPD2	248.428	266.188	272.174	245.242	206.719	251.46
GABARAPL1	213.243	368.658	110.684	297.885	181.912	250.598
OGFRL1	288.945	243.809	212.296	242.674	239.794	250.311
CCDC92	172.727	306.234	168.748	376.208	170.887	250.023
ATP5MC2	263.355	248.52	248.586	256.797	206.719	250.023
ATP6V0E1	237.766	270.899	248.586	243.958	231.525	248.299
ZFAND5	260.157	226.142	228.626	261.933	270.112	248.299
PTPRN	176.992	301.522	108.87	407.024	173.644	247.724
CDC42	245.23	267.366	230.441	241.39	242.55	247.15
PHLDA3	269.753	206.119	257.658	261.933	237.037	247.15
TYROBP	292.143	219.075	319.351	192.598	203.962	247.15
DPYSL3	182.323	268.543	114.313	403.172	228.769	246.862
VCP	214.309	279.144	246.771	300.453	140.569	246.862
WSB1	347.587	193.163	206.852	227.266	214.987	246.862
ARL6IP4	284.68	228.497	261.287	229.834	201.206	246.287
NDUFV1	254.826	290.922	243.142	222.13	170.887	245.713
KCTD12	308.137	216.719	252.215	163.066	319.725	245.713
SORBS1	308.137	199.052	259.473	211.858	242.55	245.425
RPN2	280.415	227.32	243.142	218.278	250.819	244.563
TIMP4	298.541	246.165	148.788	243.958	242.55	243.988
ACLY	204.714	285.033	165.119	342.825	154.35	243.701
RAB7A	248.428	241.453	195.965	268.353	253.575	243.414
BST2	264.422	174.318	413.705	152.794	283.894	243.126
DAG1	311.335	190.807	248.586	199.018	270.112	242.551
WARS	217.508	273.255	195.965	283.761	212.231	241.977
DEPP1	294.276	183.74	328.423	170.77	264.6	241.977
PRXL2A	234.568	255.587	163.304	261.933	305.944	241.977
MAGED1	210.045	269.721	185.078	272.205	275.625	241.402
FCGRT	254.826	189.629	395.56	193.882	192.937	241.114
TMEM233	163.131	247.343	114.313	426.284	212.231	239.965
ATP5PF	230.303	244.987	219.554	251.661	259.087	239.965
TKT	192.985	279.144	217.739	283.761	206.719	239.678
VSIG4	238.832	230.853	319.351	197.734	231.525	239.678
CEND1	165.264	371.014	134.273	296.601	159.862	239.39
MFGE8	266.554	240.276	246.771	233.686	168.131	239.39
SERPINF1	249.495	162.539	466.325	151.51	237.037	239.39
RASSF4	293.209	209.652	228.626	241.39	176.4	238.815
PSMB3	212.177	254.409	228.626	232.402	294.919	238.241
COL6A1	319.865	188.451	272.174	188.746	190.181	237.378
TRIR	270.819	212.008	250.4	237.538	187.425	237.091
FABP5	245.23	263.832	186.893	252.945	184.669	235.942
REEP2	189.787	313.301	119.757	297.885	214.987	235.654
DNM1	156.734	345.102	141.53	315.861	154.35	235.654
NDUFB9	215.376	294.455	188.707	251.661	179.156	234.792
PLBD2	203.647	267.366	154.232	310.725	192.937	234.217
NUPR1	291.077	190.807	243.142	216.994	212.231	234.217
BLOC1S1	269.753	209.652	234.07	223.414	220.5	233.93
PSMB7	207.912	287.388	170.562	264.501	201.206	233.355
EIF3K	223.905	259.121	261.287	216.994	190.181	233.355
SLC22A17	268.687	239.098	219.554	201.586	212.231	232.78
ATP6AP2	203.647	240.276	208.667	287.613	209.475	232.78
WDR83OS	234.568	254.409	234.07	228.55	179.156	232.206
MVD	201.515	274.432	136.087	328.701	146.081	231.631
AHR	309.203	187.274	237.699	160.498	275.625	231.343
KIF21A	159.932	322.723	123.386	297.885	212.231	230.194
MICOS13	217.508	260.299	210.481	240.106	201.206	230.194
ARPC5	204.714	226.142	217.739	240.106	294.919	229.332
DCXR	275.084	200.23	254.029	210.574	181.912	229.332
UQCRC1	218.574	252.054	186.893	263.217	192.937	229.044
EIF6	206.846	267.366	176.006	290.181	146.081	229.044
TGFBR2	265.488	163.717	317.536	170.77	275.625	228.757
PPA1	182.323	279.144	239.513	213.142	248.062	228.757
ERBB3	303.872	203.763	203.223	173.338	250.819	228.757
POMP	204.714	262.654	183.264	268.353	192.937	228.47
UBE2D3	219.641	220.253	221.368	234.97	264.6	228.182
ITGAV	268.687	209.652	190.522	213.142	253.575	227.895
STUB1	204.714	257.943	185.078	259.365	214.987	227.895
MT1X	231.369	262.654	241.328	170.77	239.794	227.895
CYB5R1	152.469	277.966	156.046	333.837	184.669	227.607
PSMB5	181.257	276.788	188.707	265.785	206.719	227.32
CYBA	246.296	200.23	326.609	187.462	176.4	227.32
FKBP1A	206.846	237.92	228.626	249.094	206.719	227.32
UQCRH	191.919	277.966	217.739	240.106	184.669	227.033
NDUFC2	189.787	265.01	214.11	245.242	214.987	227.033
ARL6IP1	210.045	270.899	150.603	250.377	234.281	227.033
MAP7D1	194.051	274.432	188.707	252.945	198.45	226.458
SNAP25	125.814	392.215	123.386	254.229	195.694	226.458
FAIM2	163.131	314.478	159.675	291.465	140.569	225.883
TRAPPC5	229.237	234.387	199.594	234.97	217.744	225.883
HNRNPU	232.435	191.985	259.473	213.142	256.331	225.021
SERPINB6	266.554	169.606	244.957	237.538	184.669	224.446
ITGB1	232.435	203.763	232.255	231.118	226.012	224.446
TMEM59	214.309	228.497	208.667	231.118	248.062	224.159
ENDOD1	231.369	236.742	157.861	269.637	176.4	223.871
PPIB	260.157	171.962	288.504	181.042	242.55	223.584
ZFP36L1	279.349	187.274	263.102	161.782	234.281	223.297
ATF3	191.919	277.966	128.829	287.613	179.156	223.009
OS9	279.349	162.539	201.409	222.13	250.819	222.722
ECE1	303.872	182.562	210.481	195.166	181.912	222.435
ATP5PO	200.449	260.299	206.852	216.994	223.256	222.147
SCN7A	310.269	204.941	183.264	182.326	176.4	221.86
HDLBP	212.177	229.675	239.513	215.71	214.987	221.86
TLN1	243.097	206.119	246.771	200.302	209.475	221.572
C11orf96	184.455	193.163	312.093	241.39	198.45	220.998
HNRNPH1	264.422	186.096	281.246	173.338	195.694	220.423
VPS28	216.442	210.83	228.626	232.402	214.987	220.423
DAD1	221.773	233.209	230.441	202.87	209.475	220.423
ENTPD6	204.714	267.366	128.829	276.057	168.131	220.136
PRDX6	227.104	208.474	244.957	213.142	203.962	219.848
MDH1	174.859	346.28	123.386	215.71	195.694	219.848
TBCA	175.926	261.476	154.232	254.229	261.844	219.848
ARPC4	219.641	203.763	237.699	229.834	206.719	219.561
SEC61G	219.641	237.92	188.707	214.426	231.525	219.273
LTBP3	326.262	157.828	210.481	178.474	187.425	219.273
DNAJA1	165.264	265.01	176.006	265.785	212.231	218.699
HEBP2	153.535	323.901	116.128	287.613	146.081	218.411
SERINC3	164.197	269.721	179.635	263.217	201.206	218.411
SERPINA5	291.077	217.897	161.49	184.894	187.425	218.124
C12orf57	208.978	199.052	301.206	182.326	234.281	217.836
CLTA	207.912	226.142	195.965	225.982	234.281	217.262
ACTR1A	186.588	243.809	152.417	287.613	181.912	217.262
SYP	180.191	224.964	141.53	317.145	195.694	217.262
AKR1B1	189.787	227.32	219.554	224.698	242.55	216.974
NAPB	148.204	250.876	123.386	353.096	165.375	216.974
BRI3	206.846	215.541	266.731	209.29	184.669	216.687
ATP6V1G1	176.992	269.721	163.304	231.118	245.306	216.687
NDUFB10	198.316	253.232	219.554	215.71	173.644	216.4
TRMT112	236.7	216.719	201.409	202.87	212.231	216.112
RBX1	217.508	233.209	176.006	220.846	220.5	215.825
SMIM29	215.376	237.92	166.933	232.402	195.694	214.963
CYSTM1	198.316	234.387	127.015	265.785	234.281	214.675
HLA-DMA	274.018	161.362	261.287	165.634	220.5	214.675
MATN2	287.878	184.918	161.49	184.894	231.525	213.813
CARHSP1	207.912	191.985	230.441	241.39	195.694	213.813
NAPA	191.919	255.587	192.336	224.698	181.912	213.813
TMOD1	162.065	262.654	110.684	329.985	137.812	213.526
ARL2	242.031	191.985	214.11	209.29	198.45	213.526
NDUFB11	200.449	255.587	194.151	191.314	226.012	213.526
HK1	176.992	253.232	163.304	247.81	212.231	212.951
METRN	288.945	171.962	188.707	196.45	184.669	212.951
GDI2	201.515	209.652	208.667	219.562	239.794	212.664
PGRMC1	228.17	220.253	150.603	242.674	184.669	212.664
STXBP1	158.866	266.188	139.716	288.897	162.619	211.514
SAP18	187.654	240.276	212.296	206.722	212.231	211.227
SREBF1	274.018	168.428	215.925	173.338	223.256	211.227
CSF1R	228.17	200.23	250.4	183.61	190.181	210.939
ZFP36L2	250.561	181.385	241.328	150.226	259.087	210.652
MTRNR2L12	90.6284	194.341	141.53	97.583	904.049	210.364
MRPL41	210.045	204.941	199.594	252.945	148.837	210.364
PLAC9	206.846	247.343	217.739	168.202	201.206	209.215
SREBF2	202.581	208.474	179.635	254.229	176.4	209.215
CLTB	157.8	270.899	185.078	232.402	181.912	208.928
NDUFB8	210.045	208.474	195.965	229.834	181.912	208.928
DAZAP2	235.634	193.163	232.255	169.486	226.012	208.928
CUTA	202.581	222.608	203.223	210.574	195.694	208.64
TPM3	227.104	179.029	205.038	195.166	256.331	207.778
TUFM	211.111	208.474	230.441	202.87	170.887	207.491
SNU13	194.051	213.186	190.522	240.106	184.669	207.491
MAGED2	213.243	187.274	185.078	246.526	190.181	207.491
EIF5A	205.78	210.83	197.78	205.438	214.987	206.628
PAFAH1B1	165.264	232.031	148.788	281.193	173.644	205.766
PITHD1	173.793	273.255	117.942	256.797	151.594	205.479
MLF2	188.72	224.964	172.377	237.538	184.669	205.479
TCEAL4	196.184	206.119	195.965	232.402	184.669	205.479
ABCA2	272.951	159.006	205.038	191.314	168.131	205.192
CPE	158.866	301.522	112.499	228.55	181.912	204.329
MRPS21	211.111	232.031	159.675	215.71	159.862	203.755
VSIR	239.899	164.895	237.699	188.746	181.912	203.755
SRSF5	224.972	167.251	215.925	225.982	165.375	203.467
NENF	195.118	188.451	206.852	241.39	168.131	202.893
PDIA3	211.111	208.474	226.812	173.338	195.694	202.893
RCAN2	130.078	274.432	116.128	297.885	148.837	202.605
CALCB	129.012	208.474	108.87	381.344	135.056	202.318
NMB	129.012	232.031	154.232	305.589	173.644	202.318
UBA1	245.23	188.451	192.336	209.29	118.519	201.743
KRTCAP2	211.111	162.539	264.916	187.462	201.206	201.456
NUCB1	214.309	187.274	206.852	193.882	209.475	201.456
PTOV1	217.508	171.962	159.675	249.094	190.181	201.456
NR4A1	258.024	133.094	281.246	157.93	181.912	200.881
HMGN2	240.965	179.029	246.771	160.498	162.619	200.593
TOMM5	133.277	230.853	168.748	281.193	179.156	200.593
FUS	228.17	176.673	208.667	199.018	176.4	200.593
TXNL4A	153.535	208.474	148.788	309.441	148.837	200.593
CTSA	222.839	228.497	168.748	201.586	124.031	200.593
ATP6V0E2	164.197	247.343	141.53	258.081	148.837	200.306
ARPP19	169.528	226.142	145.159	242.674	212.231	200.306
SEC61A1	194.051	201.407	194.151	213.142	187.425	199.444
PJA2	159.932	227.32	143.345	258.081	195.694	199.444
STOM	219.641	162.539	266.731	155.362	226.012	199.444
SRGN	184.455	187.274	306.649	137.387	237.037	199.444
PSME1	235.634	164.895	232.255	173.338	192.937	199.444
GLG1	236.7	171.962	203.223	183.61	192.937	199.157
LAMB1	259.091	161.362	195.965	178.474	179.156	198.869
VDAC2	153.535	230.853	161.49	267.069	151.594	198.869
ZCCHC24	248.428	167.251	255.844	132.251	201.206	198.869
DDT	169.528	237.92	141.53	238.822	184.669	198.869
CDKN2D	133.277	268.543	94.3537	282.477	176.4	198.007
MTURN	205.78	161.362	188.707	222.13	223.256	197.72
ZFP36	228.17	164.895	217.739	192.598	176.4	197.72
MXRA8	222.839	159.006	244.957	165.634	212.231	196.857
MT1M	264.422	144.872	255.844	138.671	179.156	196.857
TMBIM1	228.17	176.673	246.771	175.906	129.544	196.57
FDFT1	190.853	210.83	119.757	234.97	209.475	196.283
ABCA3	187.654	207.297	117.942	285.045	121.275	196.283
PSMA7	164.197	253.232	157.861	191.314	214.987	196.283
LSS	186.588	224.964	143.345	238.822	143.325	196.283
EPDR1	133.277	249.698	96.1682	309.441	140.569	195.995
RHBDD2	171.661	237.92	156.046	238.822	129.544	195.995
MID1IP1	199.382	212.008	145.159	196.45	226.012	195.995
SCARB2	212.177	180.207	208.667	177.19	209.475	195.708
PCBP4	217.508	190.807	174.191	209.29	151.594	195.421
NGRN	165.264	228.497	117.942	265.785	159.862	195.133
RAB1A	189.787	190.807	197.78	222.13	154.35	194.846
RPS27L	242.031	179.029	177.82	159.214	212.231	194.846
ID1	198.316	110.715	433.664	111.707	198.45	194.846
C1orf122	171.661	206.119	154.232	247.81	173.644	194.558
CD47	187.654	186.096	168.748	219.562	217.744	194.558
COX17	176.992	190.807	150.603	270.921	151.594	194.558
DDX39B	237.766	137.805	228.626	183.61	187.425	194.558
ALDOA	139.674	267.366	137.902	269.637	90.9562	194.558
CSNK1A1	186.588	200.23	194.151	191.314	206.719	194.271
SIGIRR	221.773	176.673	197.78	192.598	162.619	194.271
FLOT2	191.919	187.274	185.078	218.278	179.156	194.271
C19orf53	200.449	216.719	156.046	190.03	192.937	194.271
NOP53	191.919	164.895	321.165	127.115	220.5	194.271
MORF4L2	184.455	168.428	201.409	232.402	187.425	194.271
NCL	198.316	162.539	201.409	178.474	278.381	193.984
MCAM	165.264	227.32	210.481	214.426	121.275	193.984
PSMB6	190.853	194.341	188.707	206.722	181.912	193.984
MDH2	176.992	222.608	179.635	223.414	124.031	193.409
PYGB	172.727	250.876	139.716	220.846	135.056	193.409
CYP51A1	165.264	227.32	159.675	202.87	214.987	193.121
ARPC3	204.714	183.74	170.562	205.438	192.937	193.121
ZNHIT1	203.647	184.918	203.223	193.882	165.375	192.834
SH3GLB2	187.654	179.029	177.82	238.822	159.862	192.547
CCDC85B	169.528	242.631	203.223	168.202	168.131	192.259
TRAPPC1	169.528	196.696	181.449	220.846	195.694	192.259
TMEM259	222.839	171.962	210.481	191.314	126.787	191.397
CAVIN3	270.819	130.738	194.151	166.918	173.644	191.11
PSMC3	187.654	197.874	179.635	199.018	184.669	191.11
PTTG1IP	226.038	147.228	221.368	175.906	187.425	190.822
FKBP8	167.396	213.186	181.449	196.45	198.45	190.535
FEZ1	172.727	210.83	107.055	247.81	190.181	190.248
UQCRFS1	147.138	262.654	127.015	213.142	179.156	190.248
HSPA9	167.396	234.387	154.232	193.882	190.181	189.96
WDR1	206.846	180.207	176.006	204.154	157.106	189.673
PUF60	202.581	182.562	197.78	209.29	118.519	189.673
GABBR1	194.051	200.23	192.336	204.154	115.762	189.386
NDUFB4	195.118	204.941	165.119	186.178	179.156	189.098
RAB6A	172.727	223.786	137.902	196.45	212.231	189.098
ACHE	139.674	180.207	114.313	331.269	143.325	188.811
WASHC1	231.369	167.251	205.038	183.61	115.762	188.811
NCS1	163.131	197.874	116.128	287.613	132.3	188.811
UBE2M	181.257	191.985	181.449	219.562	146.081	188.811
HNRNPA3	228.17	156.65	203.223	161.782	192.937	188.236
XRCC6	162.065	208.474	212.296	199.018	146.081	187.949
IGFBP5	220.707	140.161	226.812	138.671	259.087	187.661
TMEM30A	179.124	220.253	130.644	220.846	148.837	187.661
NDUFS7	198.316	214.364	170.562	169.486	162.619	187.661
PLAAT3	246.296	159.006	221.368	139.955	151.594	187.374
SDCBP	157.8	216.719	185.078	169.486	234.281	187.086
NME3	229.237	138.983	214.11	204.154	113.006	187.086
PLXND1	194.051	162.539	263.102	159.214	162.619	186.224
MSMO1	169.528	213.186	110.684	232.402	179.156	185.937
LAMTOR5	187.654	223.786	166.933	177.19	137.812	185.65
USP5	145.005	212.008	146.974	237.538	168.131	184.787
HNRNPDL	203.647	155.472	201.409	184.894	176.4	184.5
B4GAT1	199.382	200.23	132.458	208.006	137.812	184.5
CSTB	189.787	193.163	176.006	165.634	203.962	184.5
RPS4Y1	186.588	162.539	235.884	157.93	209.475	184.5
MICOS10	170.595	213.186	143.345	215.71	148.837	184.5
CTNNB1	182.323	174.318	243.142	148.943	198.45	184.213
MRPL52	163.131	197.874	172.377	213.142	162.619	184.213
B4GALNT4	206.846	167.251	185.078	199.018	129.544	183.925
LHFPL6	188.72	151.939	279.432	110.423	259.087	183.925
LPIN1	158.866	200.23	110.684	250.377	176.4	183.638
TSC22D1	176.992	197.874	215.925	145.091	195.694	183.063
PFN2	153.535	228.497	119.757	210.574	179.156	181.914
BRK1	164.197	180.207	150.603	205.438	226.012	181.626
TPRG1L	127.946	249.698	146.974	197.734	176.4	181.339
SOD3	204.714	179.029	179.635	137.387	220.5	181.051
RAB11A	149.27	187.274	165.119	241.39	143.325	181.051
LRP10	210.045	149.583	214.11	156.646	173.644	180.189
SLC25A1	170.595	188.451	148.788	224.698	137.812	180.189
SLCO2B1	191.919	150.761	226.812	163.066	179.156	179.614
JPT1	119.416	234.387	119.757	252.945	137.812	179.327
MCRIP1	183.389	161.362	194.151	196.45	148.837	179.04
SYNGR1	178.058	190.807	146.974	220.846	113.006	179.04
RPS19BP1	178.058	186.096	174.191	190.03	148.837	179.04
LY6E	195.118	126.027	281.246	139.955	181.912	178.178
OPTN	178.058	181.385	112.499	211.858	198.45	178.178
FCGR3A	179.124	176.673	194.151	137.387	239.794	177.89
HADHA	175.926	182.562	185.078	183.61	148.837	177.89
RAB1B	168.462	179.029	188.707	195.166	146.081	177.89
DDX3X	200.449	151.939	206.852	170.77	151.594	177.89
RUFY3	127.946	240.276	101.612	249.094	121.275	177.603
VAMP1	129.012	306.234	92.5392	175.906	135.056	177.603
BLVRB	170.595	194.341	212.296	157.93	143.325	177.315
F13A1	136.476	126.027	408.261	91.1631	234.281	177.028
GNG2	191.919	153.117	134.273	201.586	206.719	177.028
CNBP	187.654	181.385	201.409	150.226	157.106	176.741
SELENOT	135.409	190.807	143.345	240.106	165.375	176.741
IGFBP6	148.204	148.406	277.617	125.831	272.869	176.741
PSMD4	160.999	194.341	157.861	208.006	135.056	176.453
DNAJB2	191.919	193.163	146.974	172.054	151.594	176.453
EGFL7	159.932	182.562	263.102	133.535	165.375	176.453
COTL1	179.124	183.74	177.82	145.091	212.231	175.878
YBX1	167.396	176.673	235.884	110.423	242.55	175.591
SNHG6	157.8	159.006	201.409	159.214	256.331	175.591
YPEL3	199.382	169.606	166.933	183.61	124.031	175.591
ADCY3	206.846	157.828	199.594	141.239	170.887	175.304
KIAA0930	206.846	169.606	150.603	193.882	104.737	175.304
AP1S2	168.462	187.274	141.53	186.178	192.937	175.304
GSTO1	154.601	177.851	223.183	155.362	190.181	175.016
TCF25	172.727	193.163	148.788	181.042	162.619	174.729
SUMO2	182.323	156.65	172.377	152.794	248.062	174.729
KIFAP3	124.747	202.585	110.684	264.501	137.812	174.154
CCM2	129.012	222.608	117.942	233.686	135.056	174.154
ENG	162.065	130.738	357.455	101.435	184.669	174.154
NUCKS1	181.257	162.539	165.119	147.659	250.819	173.867
PMP2	183.389	157.828	143.345	161.782	259.087	173.867
PLEKHB2	155.668	177.851	143.345	213.142	170.887	173.579
C6orf62	178.058	166.073	161.49	166.918	212.231	173.579
AIF1	190.853	164.895	177.82	139.955	214.987	173.579
TACC1	171.661	155.472	223.183	146.375	203.962	173.579
POLR2E	152.469	233.209	136.087	169.486	154.35	173.579
FAM50A	172.727	163.717	192.336	166.918	184.669	173.579
EIF3F	182.323	177.851	188.707	151.51	162.619	173.292
SLC25A4	131.145	265.01	110.684	187.462	129.544	173.005
CALD1	189.787	131.916	230.441	130.967	228.769	173.005
VKORC1	165.264	155.472	159.675	213.142	168.131	173.005
C1orf198	219.641	121.316	205.038	148.943	170.887	172.43
EID1	175.926	148.406	176.006	172.054	214.987	172.43
ITGB2	178.058	166.073	250.4	141.239	121.275	172.43
VDAC3	123.681	195.518	108.87	267.069	135.056	172.143
PAFAH1B2	173.793	170.784	165.119	165.634	192.937	171.855
TMEM219	175.926	163.717	174.191	192.598	132.3	171.855
IMPDH1	129.012	261.476	123.386	179.758	124.031	171.28
SMDT1	146.072	195.518	152.417	187.462	173.644	171.28
TMEFF2	103.423	195.518	78.0232	312.009	126.787	170.993
IDI1	136.476	204.941	117.942	211.858	173.644	170.993
MAPK8IP3	180.191	162.539	130.644	215.71	132.3	170.993
H2AFJ	210.045	131.916	228.626	124.547	170.887	170.706
METTL7A	191.919	150.761	172.377	139.955	226.012	170.706
SSU72	165.264	184.918	183.264	141.239	192.937	170.418
FAM20C	184.455	153.117	165.119	182.326	157.106	170.418
TPP1	191.919	134.272	177.82	172.054	184.669	170.418
PACS2	192.985	159.006	166.933	184.894	113.006	170.418
ABHD2	148.204	223.786	119.757	181.042	157.106	170.418
COPE	163.131	194.341	159.675	187.462	113.006	170.418
JOSD2	170.595	154.295	161.49	192.598	173.644	170.418
ARPC2	140.741	193.163	157.861	178.474	192.937	170.131
PET100	173.793	128.383	195.965	179.758	198.45	170.131
CYP1B1	150.336	134.272	268.545	97.583	308.7	169.843
NPM1	172.727	138.983	166.933	173.338	231.525	169.843
SYNGR3	127.946	191.985	83.4667	265.785	151.594	169.843
USF2	189.787	148.406	166.933	169.486	170.887	169.556
NDUFA2	166.33	188.451	157.861	164.35	157.106	168.981
PPP1CA	188.72	179.029	177.82	139.955	143.325	168.981
EMC10	171.661	176.673	148.788	192.598	124.031	168.981
CD99L2	162.065	200.23	121.571	182.326	154.35	168.694
ACTR2	159.932	154.295	174.191	161.782	228.769	168.407
TNFRSF1A	206.846	111.893	248.586	123.263	176.4	168.407
ACTN4	175.926	155.472	165.119	159.214	203.962	168.407
MAPRE2	139.674	196.696	116.128	184.894	217.744	168.119
PRX	199.382	123.671	244.957	109.139	201.206	168.119
STAT2	215.376	128.383	190.522	147.659	146.081	167.832
IFNGR2	187.654	135.449	163.304	163.066	209.475	167.832
CAPN2	164.197	183.74	145.159	169.486	168.131	167.544
ATP1A2	183.389	190.807	130.644	152.794	157.106	167.257
ATP2B4	171.661	130.738	114.313	250.377	143.325	167.257
VAPA	149.27	187.274	154.232	159.214	203.962	167.257
KLF2	151.403	127.205	335.681	98.867	190.181	166.97
NDUFS8	154.601	164.895	176.006	174.622	170.887	166.682
PSMB2	166.33	186.096	130.644	177.19	151.594	166.395
RHEB	158.866	190.807	121.571	191.314	143.325	166.395
TYMP	208.978	135.449	255.844	109.139	115.762	166.395
TMX4	135.409	173.14	108.87	237.538	162.619	166.107
GPR155	182.323	138.983	152.417	164.35	209.475	165.82
FGFBP2	207.912	131.916	246.771	115.559	121.275	165.82
NDUFS6	153.535	147.228	161.49	187.462	201.206	165.82
PSMC1	137.542	179.029	166.933	192.598	148.837	165.82
GATM	200.449	135.449	152.417	134.819	234.281	165.82
NDUFAB1	150.336	206.119	119.757	188.746	132.3	165.82
CCT7	138.608	157.828	185.078	196.45	157.106	165.533
CNTN2	164.197	186.096	121.571	199.018	113.006	165.245
SCAND1	168.462	166.073	172.377	155.362	165.375	165.245
EIF4B	150.336	168.428	203.223	133.535	203.962	164.958
PRMT2	159.932	162.539	145.159	159.214	226.012	164.958
SLC3A2	189.787	121.316	195.965	154.078	176.4	164.671
FSTL3	231.369	136.627	166.933	124.547	140.569	164.671
CDS2	138.608	168.428	123.386	242.674	118.519	164.671
EIF1B	119.416	246.165	103.426	190.03	126.787	164.383
ECHS1	158.866	180.207	157.861	177.19	124.031	164.383
PLEKHA4	202.581	150.761	181.449	95.015	220.5	164.383
RBM3	181.257	150.761	145.159	184.894	137.812	164.383
NISCH	183.389	155.472	166.933	165.634	126.787	164.096
AKR1C1	140.741	151.939	123.386	249.094	129.544	163.808
FBLN5	189.787	166.073	148.788	138.671	168.131	163.808
TMED9	187.654	167.251	179.635	138.671	121.275	163.521
KLF6	164.197	161.362	157.861	161.782	179.156	163.521
SF1	190.853	135.449	190.522	139.955	168.131	163.521
ISLR	215.376	147.228	177.82	111.707	157.106	163.521
ZYX	152.469	155.472	205.038	141.239	192.937	163.234
NDUFV2	151.403	199.052	166.933	156.646	118.519	163.234
BASP1	78.9	220.253	79.8377	233.686	220.5	162.946
ITPK1	197.25	133.094	134.273	173.338	165.375	162.946
ST13	150.336	163.717	163.304	170.77	176.4	162.946
VDAC1	130.078	189.629	116.128	195.166	184.669	162.659
ANAPC16	195.118	150.761	177.82	124.547	162.619	162.371
FAM189B	131.145	203.763	123.386	210.574	99.2249	162.084
AEBP1	176.992	103.648	313.907	91.1631	179.156	161.797
APBB1	160.999	181.385	132.458	174.622	135.056	161.797
EPHX1	151.403	166.073	145.159	173.338	176.4	161.509
PTEN	179.124	153.117	159.675	130.967	203.962	161.509
POLR2F	184.455	150.761	156.046	159.214	140.569	161.509
ACO2	158.866	186.096	121.571	174.622	143.325	161.509
COL8A1	217.508	154.295	139.716	119.411	154.35	161.222
EIF4H	165.264	137.805	176.006	152.794	201.206	161.222
ATP6V1F	152.469	168.428	130.644	178.474	176.4	161.222
PI4KA	150.336	182.562	163.304	172.054	113.006	161.222
AURKAIP1	172.727	162.539	125.2	184.894	129.544	160.935
NCOA7	117.284	177.851	132.458	220.846	148.837	160.935
JUNB	185.522	128.383	277.617	100.151	126.787	160.935
SCOC	120.482	209.652	78.0232	205.438	179.156	160.647
TIMM13	171.661	146.05	172.377	160.498	148.837	160.647
PDIA6	168.462	153.117	206.852	125.831	159.862	160.36
SDHA	135.409	229.675	143.345	159.214	90.9562	160.36
RNH1	186.588	146.05	166.933	152.794	132.3	160.36
JTB	164.197	149.583	195.965	150.226	140.569	160.072
SEM1	149.27	157.828	159.675	188.746	129.544	159.785
MAF	212.177	117.782	183.264	101.435	212.231	159.785
GSTK1	176.992	135.449	143.345	172.054	168.131	159.498
ATP1B2	189.787	195.518	97.9826	146.375	118.519	159.498
PPP2CA	145.005	182.562	141.53	160.498	165.375	159.21
PRKAR1B	113.019	209.652	78.0232	240.106	110.25	159.21
LSM7	191.919	149.583	134.273	150.226	151.594	158.923
GADD45GIP1	152.469	171.962	145.159	182.326	113.006	158.636
ATP1A3	104.489	222.608	94.3537	210.574	135.056	158.636
CEBPB	172.727	111.893	232.255	133.535	173.644	158.636
PTPA	167.396	168.428	141.53	177.19	96.4687	158.348
ATP5MC1	154.601	177.851	139.716	151.51	165.375	158.348
ATP9A	121.549	186.096	85.2812	229.834	143.325	158.061
GAS5	175.926	126.027	228.626	118.127	162.619	157.773
ARF3	142.873	162.539	130.644	192.598	146.081	157.199
ANAPC11	178.058	136.627	177.82	161.782	110.25	157.199
MRPL20	143.939	173.14	177.82	155.362	124.031	156.911
PPP1CB	175.926	169.606	139.716	137.387	146.081	156.911
HLA-DMB	187.654	130.738	195.965	128.399	137.812	156.624
FGF13	114.085	170.784	76.2087	258.081	137.812	156.624
ANO5	91.6946	229.675	67.1363	241.39	101.981	156.049
NBL1	145.005	140.161	130.644	220.846	118.519	155.762
AIF1L	171.661	173.14	148.788	120.695	159.862	155.762
COL4A2	186.588	101.293	263.102	110.423	137.812	155.762
TPM4	178.058	117.782	192.336	142.523	159.862	155.762
SMTN	201.515	121.316	170.562	136.103	137.812	155.762
ARL8A	130.078	176.673	116.128	191.314	154.35	155.474
GFRA1	132.211	186.096	92.5392	205.438	132.3	155.474
GAA	165.264	140.161	185.078	154.078	124.031	155.474
SULT4A1	104.489	216.719	72.5797	227.266	115.762	155.474
CPLX2	103.423	233.209	81.6522	205.438	110.25	155.187
ITGA7	158.866	156.65	127.015	195.166	99.2249	155.187
GAS6	159.932	179.029	188.707	114.275	124.031	155.187
NIBAN2	183.389	116.604	214.11	116.843	165.375	155.187
ASAH1	159.932	148.406	127.015	164.35	179.156	154.9
ELOVL5	130.078	166.073	119.757	199.018	148.837	154.612
SNHG5	157.8	137.805	197.78	114.275	206.719	154.612
SEC11C	142.873	183.74	105.241	170.77	157.106	154.612
AP1S1	113.019	164.895	107.055	241.39	118.519	154.037
NR2F2	182.323	117.782	199.594	110.423	190.181	154.037
EIF4G1	167.396	146.05	165.119	154.078	118.519	153.75
SHISA5	181.257	130.738	165.119	142.523	140.569	153.463
OTUB1	148.204	184.918	125.2	152.794	137.812	153.463
MCL1	174.859	118.96	174.191	148.943	154.35	153.175
AP2A2	172.727	141.339	139.716	160.498	135.056	153.175
KIF5C	115.151	207.297	70.7652	205.438	135.056	152.888
RPN1	148.204	155.472	148.788	147.659	176.4	152.888
NCOR2	155.668	148.406	145.159	165.634	140.569	152.888
TAX1BP3	166.33	124.849	176.006	133.535	190.181	152.888
EMP3	157.8	149.583	212.296	93.7311	184.669	152.888
ETFB	160.999	163.717	165.119	136.103	124.031	152.888
CCSER2	99.1581	186.096	108.87	205.438	165.375	152.6
DYNC1LI2	139.674	149.583	143.345	174.622	157.106	152.313
HM13	148.204	140.161	195.965	150.226	129.544	152.313
MSN	164.197	113.071	170.562	166.918	154.35	152.313
NDUFA6	127.946	181.385	128.829	174.622	132.3	152.026
MAT2A	168.462	135.449	166.933	152.794	118.519	151.451
ATP6V1B2	106.622	209.652	70.7652	206.722	132.3	151.164
USP22	169.528	131.916	143.345	173.338	113.006	151.164
NSF	103.423	186.096	94.3537	204.154	165.375	151.164
TOMM6	129.012	154.295	137.902	177.19	162.619	150.876
RNASET2	182.323	149.583	145.159	128.399	129.544	150.876
FXYD7	70.3703	288.566	92.5392	163.066	99.2249	150.876
CBR1	155.668	156.65	143.345	156.646	124.031	150.876
AP1B1	149.27	163.717	130.644	157.93	140.569	150.876
KIF1B	135.409	196.696	79.8377	170.77	146.081	150.589
TOMM20	146.072	155.472	128.829	152.794	179.156	150.589
NDUFA10	151.403	186.096	117.942	155.362	104.737	150.589
FBXW5	150.336	154.295	136.087	165.634	132.3	150.589
PSMA1	138.608	153.117	145.159	163.066	157.106	150.589
STEAP3	106.622	207.297	130.644	177.19	101.981	150.301
ZEB2	168.462	128.383	141.53	112.991	248.062	150.301
HSPA1A	166.33	171.962	121.571	120.695	165.375	150.301
CDIPT	140.741	167.251	132.458	165.634	129.544	150.301
UBXN6	150.336	162.539	146.974	159.214	107.494	150.301
AUP1	173.793	143.694	172.377	133.535	104.737	150.014
ITGB1BP1	152.469	154.295	125.2	170.77	124.031	149.727
NUMA1	164.197	124.849	206.852	132.251	121.275	149.727
CADM4	203.647	117.782	163.304	102.719	165.375	149.727
EPB41L2	189.787	111.893	141.53	125.831	195.694	149.439
COL4A1	171.661	94.2257	214.11	125.831	173.644	149.439
RRAS	176.992	113.071	199.594	133.535	121.275	149.439
SERPINE2	162.065	157.828	112.499	128.399	195.694	149.152
MTPN	119.416	175.495	108.87	169.486	181.912	149.152
DCTN3	137.542	170.784	125.2	177.19	104.737	149.152
CDK2AP2	186.588	126.027	128.829	142.523	151.594	149.152
EIF5	153.535	137.805	117.942	151.51	206.719	149.152
APMAP	136.476	183.74	132.458	150.226	124.031	149.152
COMT	176.992	121.316	181.449	120.695	154.35	149.152
PTPRF	174.859	131.916	116.128	166.918	132.3	148.864
SEC61B	169.528	131.916	163.304	129.683	154.35	148.864
MPRIP	186.588	124.849	163.304	123.263	140.569	148.864
PDLIM4	217.508	113.071	145.159	112.991	135.056	148.577
C4orf3	157.8	156.65	186.893	100.151	148.837	148.29
MVP	171.661	121.316	206.852	123.263	115.762	148.29
RALY	158.866	143.694	154.232	155.362	107.494	148.29
TMEM123	176.992	126.027	174.191	95.015	198.45	148.002
SUMO3	150.336	148.406	127.015	170.77	124.031	148.002
ATXN10	108.754	179.029	105.241	191.314	148.837	148.002
RNF130	167.396	137.805	154.232	124.547	157.106	147.428
POLR2I	156.734	122.493	166.933	143.807	159.862	147.428
ADI1	165.264	157.828	127.015	143.807	113.006	147.14
ANXA11	157.8	113.071	163.304	155.362	157.106	147.14
B3GAT3	162.065	170.784	125.2	142.523	96.4687	147.14
PLLP	205.78	127.205	139.716	109.139	135.056	147.14
OCIAD1	132.211	162.539	128.829	184.894	93.7124	146.853
CYBRD1	173.793	127.205	157.861	101.435	201.206	146.565
NR2F1	221.773	97.7592	136.087	96.299	190.181	146.565
SLC1A4	150.336	150.761	101.612	188.746	99.2249	145.991
TMEM59L	106.622	221.43	90.7247	161.782	121.275	145.991
ALDH2	118.35	187.274	132.458	152.794	124.031	145.703
NFIC	137.542	151.939	139.716	98.867	261.844	145.703
PPP2CB	145.005	154.295	145.159	145.091	126.787	145.416
PHLDB1	176.992	115.427	190.522	129.683	99.2249	145.416
NPTN	114.085	156.65	121.571	191.314	137.812	145.416
TAGLN3	101.291	212.008	94.3537	181.042	101.981	145.128
PHPT1	156.734	137.805	145.159	150.226	121.275	145.128
GJA1	170.595	138.983	119.757	120.695	179.156	144.554
PRPF8	149.27	133.094	157.861	145.091	137.812	144.554
NDUFB6	148.204	150.761	108.87	150.226	159.862	144.266
LITAF	185.522	117.782	143.345	124.547	143.325	144.266
SFPQ	167.396	93.0479	176.006	133.535	176.4	143.979
EIF3B	150.336	138.983	152.417	146.375	121.275	143.979
MOAP1	102.357	150.761	96.1682	231.118	121.275	143.979
SYT4	102.357	160.184	97.9826	224.698	110.25	143.979
EPB41L1	109.82	183.74	78.0232	208.006	101.981	143.979
APOL2	121.549	171.962	121.571	175.906	101.981	143.979
DPP7	190.853	115.427	145.159	123.263	129.544	143.692
NAP1L4	124.747	154.295	143.345	159.214	135.056	143.692
EHBP1	162.065	129.56	134.273	137.387	154.35	143.404
LAMB2	198.316	96.5814	183.264	100.151	143.325	143.404
GANAB	158.866	126.027	170.562	139.955	110.25	143.404
RAP1GDS1	117.284	164.895	99.7971	191.314	121.275	143.117
EVL	148.204	130.738	143.345	161.782	118.519	143.117
GADD45B	160.999	124.849	201.409	116.843	107.494	143.117
SORT1	153.535	124.849	143.345	150.226	140.569	142.829
IL6ST	140.741	148.406	157.861	128.399	143.325	142.829
SRPX	176.992	110.715	176.006	118.127	132.3	142.829
SELENOH	135.409	138.983	159.675	152.794	121.275	142.542
SNHG16	139.674	124.849	137.902	139.955	203.962	142.542
PLXNB2	166.33	111.893	215.925	112.991	104.737	142.542
MS4A6A	163.131	115.427	194.151	96.299	170.887	142.255
COX14	131.145	157.828	139.716	165.634	88.1999	142.255
TMOD2	184.455	134.272	123.386	114.275	140.569	142.255
PPP1R12C	164.197	131.916	166.933	130.967	96.4687	142.255
ABHD12	137.542	157.828	130.644	157.93	101.981	142.255
NRBP2	162.065	130.738	117.942	159.214	115.762	141.967
RDX	148.204	140.161	145.159	105.287	203.962	141.967
GRB2	143.939	162.539	130.644	128.399	135.056	141.967
SDF4	130.078	140.161	172.377	132.251	148.837	141.68
FKBP1B	108.754	140.161	92.5392	238.822	96.4687	141.68
GPX2	76.7676	308.589	72.5797	118.127	74.4187	141.68
TOM1L2	149.27	164.895	121.571	141.239	99.2249	141.68
DYNLT3	110.886	196.696	68.9508	182.326	115.762	141.68
LENG8	187.654	94.2257	150.603	150.226	99.2249	141.393
MX1	130.078	151.939	107.055	169.486	137.812	141.393
CIAO2B	155.668	148.406	132.458	143.807	96.4687	141.393
CSNK2B	143.939	140.161	127.015	146.375	146.081	141.105
CSNK1D	138.608	135.449	157.861	150.226	115.762	141.105
HSPD1	143.939	128.383	148.788	138.671	154.35	140.818
CTSF	149.27	130.738	125.2	160.498	124.031	140.818
DDX24	122.615	151.939	92.5392	174.622	162.619	140.818
QSOX1	142.873	143.694	123.386	152.794	126.787	140.53
PTPRA	163.131	131.916	105.241	161.782	110.25	140.53
LPAR1	176.992	127.205	116.128	118.127	159.862	140.243
AP2B1	127.946	167.251	96.1682	170.77	110.25	140.243
EPN1	158.866	129.56	112.499	160.498	115.762	140.243
REX1BD	140.741	142.516	137.902	151.51	113.006	140.243
SEPTIN2	160.999	124.849	154.232	107.855	168.131	139.956
RNF181	126.88	150.761	146.974	155.362	101.981	139.668
ANXA7	154.601	134.272	121.571	139.955	140.569	139.668
MAPRE3	97.0257	195.518	83.4667	183.61	107.494	139.381
NDUFB3	103.423	207.297	97.9826	163.066	85.4437	139.381
SUB1	121.549	150.761	136.087	136.103	170.887	139.381
NNMT	159.932	93.0479	257.658	73.1873	157.106	139.381
NFKBIA	181.257	91.8701	161.49	124.547	140.569	139.381
NACAD	103.423	171.962	78.0232	201.586	113.006	139.093
MDK	201.515	95.4036	170.562	95.015	124.031	138.806
ISCU	126.88	166.073	125.2	128.399	148.837	138.806
KCNAB2	94.8933	184.918	96.1682	190.03	96.4687	138.519
NDUFS2	140.741	164.895	114.313	129.683	126.787	138.519
HIGD1A	107.688	175.495	87.0957	179.758	121.275	138.519
RAB5B	132.211	118.96	137.902	182.326	107.494	138.519
OGA	157.8	150.761	139.716	121.979	93.7124	138.519
CCNL2	151.403	103.648	168.748	163.066	85.4437	138.231
S100A1	163.131	142.516	123.386	123.263	118.519	138.231
CTTN	180.191	142.516	123.386	121.979	77.175	138.231
MBNL2	166.33	118.96	128.829	136.103	129.544	138.231
RBM39	158.866	98.937	156.046	138.671	148.837	138.231
SURF4	154.601	117.782	152.417	134.819	126.787	137.944
RNPS1	119.416	130.738	121.571	178.474	140.569	137.944
ASPH	137.542	153.117	130.644	136.103	115.762	137.657
SET	135.409	123.671	170.562	111.707	181.912	137.657
SPCS2	178.058	120.138	127.015	129.683	107.494	137.657
NOP10	135.409	148.406	154.232	116.843	137.812	137.657
CCND3	141.807	130.738	141.53	143.807	121.275	137.369
DBNL	142.873	147.228	125.2	134.819	124.031	137.369
DDB1	136.476	157.828	132.458	138.671	96.4687	137.369
MYO1C	172.727	109.537	181.449	102.719	118.519	137.369
ATP5PD	117.284	150.761	128.829	143.807	157.106	137.369
LIMS2	170.595	90.6923	170.562	125.831	132.3	137.082
CPLX1	116.218	227.32	78.0232	132.251	79.9312	137.082
ERP29	133.277	155.472	107.055	159.214	101.981	137.082
RUNDC3A	94.8933	179.029	70.7652	195.166	124.031	137.082
LARP1	113.019	149.583	108.87	163.066	151.594	136.507
GPAA1	153.535	111.893	146.974	132.251	143.325	136.507
TMED2	130.078	124.849	146.974	123.263	192.937	136.507
PKD1	162.065	122.493	108.87	148.943	118.519	136.507
QDPR	104.489	131.916	90.7247	224.698	107.494	136.22
WFS1	135.409	166.073	96.1682	148.943	99.2249	135.932
ACTR10	114.085	163.717	79.8377	190.03	96.4687	135.932
VGLL4	179.124	114.249	107.055	145.091	96.4687	135.645
LSM4	124.747	160.184	116.128	145.091	115.762	135.645
UBE2L3	130.078	169.606	128.829	124.547	104.737	135.645
HUWE1	126.88	133.094	132.458	147.659	143.325	135.645
ILK	140.741	129.56	168.748	114.275	129.544	135.357
SON	129.012	117.782	146.974	128.399	190.181	135.357
JAK1	98.0919	171.962	117.942	160.498	115.762	135.07
RETREG2	115.151	157.828	112.499	168.202	96.4687	135.07
NDUFAF3	120.482	138.983	134.273	155.362	121.275	135.07
HSD17B12	117.284	146.05	105.241	151.51	165.375	135.07
EIF3G	156.734	123.671	174.191	101.435	118.519	135.07
HSPE1	137.542	159.006	134.273	112.991	118.519	134.783
TSPAN7	91.6946	160.184	97.9826	193.882	115.762	134.783
LRPAP1	168.462	117.782	146.974	107.855	124.031	134.495
PICALM	148.204	127.205	123.386	142.523	115.762	134.495
PRKCSH	147.138	117.782	159.675	129.683	113.006	134.495
COL6A2	138.608	95.4036	239.513	91.1631	148.837	134.495
EIF3I	135.409	142.516	116.128	124.547	159.862	134.208
RNF11	120.482	155.472	96.1682	148.943	146.081	134.208
SF3B5	127.946	118.96	174.191	130.967	132.3	134.208
ERBB2	176.992	97.7592	150.603	107.855	140.569	134.208
PDXK	111.953	144.872	163.304	127.115	137.812	134.208
CHPF	148.204	150.761	94.3537	147.659	85.4437	133.633
NDUFC1	136.476	128.383	137.902	123.263	154.35	133.633
SPOCK1	92.7608	176.673	70.7652	201.586	88.1999	133.633
C20orf27	117.284	114.249	119.757	208.006	82.6875	133.633
MAPK8IP2	102.357	189.629	83.4667	163.066	96.4687	133.633
GBA	135.409	131.916	152.417	136.103	96.4687	133.346
HABP4	109.82	160.184	92.5392	168.202	118.519	133.346
TOLLIP	110.886	150.761	97.9826	179.758	104.737	133.346
OAZ2	95.9595	134.272	125.2	193.882	110.25	133.346
TPGS2	94.8933	154.295	88.9102	178.474	154.35	133.346
COL5A3	200.449	96.5814	148.788	105.287	82.6875	133.346
NCKAP1	116.218	162.539	105.241	150.226	113.006	133.058
NUDT3	132.211	134.272	123.386	130.967	151.594	133.058
PDK4	159.932	106.004	141.53	111.707	159.862	133.058
OAT	121.549	181.385	78.0232	137.387	124.031	133.058
MAN2A2	166.33	120.138	121.571	111.707	140.569	133.058
ATP5PB	102.357	153.117	132.458	145.091	140.569	133.058
EMC4	110.886	147.228	134.273	141.239	135.056	132.771
IFI16	154.601	100.115	152.417	102.719	184.669	132.484
ALCAM	107.688	148.406	81.6522	172.054	151.594	132.484
CCT5	113.019	135.449	157.861	138.671	124.031	132.484
RHBDF1	208.978	97.7592	117.942	101.435	104.737	132.484
MRPL51	123.681	124.849	132.458	160.498	110.25	132.196
BTG1	154.601	116.604	139.716	93.7311	181.912	132.196
NDN	106.622	150.761	90.7247	170.77	135.056	132.196
PSMD3	125.814	141.339	112.499	156.646	104.737	132.196
TGOLN2	148.204	103.648	143.345	124.547	154.35	131.909
SRSF3	140.741	141.339	152.417	100.151	124.031	131.909
PON2	181.257	117.782	112.499	111.707	110.25	131.909
CYC1	122.615	160.184	107.055	128.399	135.056	131.909
CTNNAL1	169.528	113.071	136.087	93.7311	154.35	131.909
C11orf58	146.072	115.427	112.499	128.399	170.887	131.909
BAD	134.343	134.272	123.386	148.943	96.4687	131.909
TM9SF2	162.065	104.826	117.942	133.535	135.056	131.909
WDR13	137.542	129.56	174.191	114.275	96.4687	131.909
RNF7	119.416	143.694	123.386	165.634	74.4187	131.621
PSMF1	149.27	128.383	114.313	125.831	132.3	131.621
RTF2	141.807	134.272	134.273	118.127	124.031	131.621
PSMD13	130.078	129.56	121.571	151.51	110.25	131.334
RAB5C	129.012	110.715	172.377	137.387	110.25	131.334
H2AFZ	130.078	130.738	137.902	127.115	132.3	131.047
YIPF3	126.88	134.272	132.458	156.646	77.175	131.047
KCNMB4	164.197	111.893	139.716	106.571	129.544	131.047
ADAR	138.608	106.004	163.304	139.955	99.2249	130.759
CTBP1	140.741	113.071	103.426	164.35	115.762	130.759
SLC44A1	170.595	93.0479	152.417	107.855	132.3	130.759
CYB5R2	211.111	101.293	152.417	79.6072	68.9062	130.759
PSMA6	113.019	126.027	125.2	169.486	113.006	130.759
SLC66A2	114.085	159.006	117.942	141.239	104.737	130.759
LANCL1	98.0919	175.495	85.2812	156.646	121.275	130.472
SNCA	125.814	124.849	103.426	152.794	148.837	130.472
HNRNPA0	143.939	117.782	152.417	100.151	157.106	130.472
SSR1	132.211	128.383	148.788	109.139	148.837	130.472
EDNRB	139.674	133.094	125.2	124.547	121.275	130.472
ABHD17A	134.343	130.738	134.273	119.411	137.812	130.472
HPCAL1	115.151	135.449	79.8377	191.314	101.981	130.185
SF3B1	154.601	95.4036	156.046	105.287	162.619	130.185
KDELR2	154.601	103.648	172.377	97.583	135.056	130.185
PRSS23	155.668	97.7592	141.53	102.719	181.912	130.185
ATL1	91.6946	188.451	67.1363	159.214	126.787	130.185
PACSIN2	135.409	142.516	107.055	147.659	85.4437	130.185
NHP2	123.681	129.56	128.829	151.51	101.981	129.897
CAPN1	125.814	126.027	139.716	141.239	110.25	129.897
PCBP3	94.8933	168.428	74.3942	182.326	101.981	129.897
BAG6	135.409	122.493	136.087	132.251	113.006	129.322
PDAP1	125.814	128.383	139.716	123.263	137.812	129.322
APRT	126.88	115.427	148.788	124.547	148.837	129.322
RAB2A	123.681	123.671	121.571	139.955	143.325	129.035
PFKM	94.8933	161.362	112.499	150.226	121.275	129.035
SRSF2	142.873	114.249	137.902	125.831	121.275	129.035
MGAT1	134.343	84.8032	176.006	133.535	135.056	128.748
NELFE	123.681	123.671	150.603	114.275	151.594	128.748
GALNT2	170.595	95.4036	168.748	107.855	79.9312	128.46
YPEL5	117.284	149.583	103.426	138.671	124.031	128.46
WSB2	107.688	120.138	103.426	192.598	101.981	128.46
CDK2AP1	126.88	120.138	132.458	132.251	137.812	128.46
NME1	133.277	174.318	78.0232	124.547	93.7124	128.46
TPD52L2	122.615	141.339	114.313	142.523	104.737	128.46
BIN1	164.197	111.893	105.241	134.819	93.7124	128.173
FGD5-AS1	132.211	109.537	139.716	111.707	179.156	128.173
BRD2	142.873	126.027	130.644	128.399	90.9562	128.173
PRAF2	109.82	148.406	123.386	143.807	101.981	128.173
CAPZA2	109.82	134.272	134.273	130.967	143.325	127.886
TPD52	83.1649	156.65	81.6522	184.894	124.031	127.886
CCT4	103.423	131.916	119.757	152.794	137.812	127.598
CD164	130.078	128.383	121.571	111.707	162.619	127.598
VPS35	98.0919	162.539	81.6522	142.523	159.862	127.598
KRT10	135.409	113.071	128.829	136.103	121.275	127.598
SYNGR2	134.343	104.826	163.304	115.559	135.056	127.598
FXYD5	118.35	108.36	186.893	116.843	129.544	127.598
PRMT1	143.939	101.293	154.232	141.239	77.175	127.598
WIPF1	164.197	83.6253	134.273	111.707	157.106	127.311
MYL12A	124.747	109.537	186.893	106.571	129.544	127.311
STARD7	123.681	130.738	119.757	129.683	132.3	127.023
BAG1	99.1581	129.56	97.9826	175.906	132.3	127.023
BNIP3	89.5622	195.518	63.5073	145.091	121.275	127.023
IRS2	137.542	121.316	110.684	110.423	173.644	127.023
YIF1B	115.151	137.805	117.942	150.226	96.4687	127.023
SCP2	126.88	131.916	139.716	112.991	124.031	126.736
TTL	101.291	163.717	74.3942	177.19	77.175	126.736
HNRNPD	134.343	111.893	125.2	129.683	137.812	126.736
FADS1	142.873	116.604	107.055	136.103	118.519	126.736
UBALD2	164.197	89.5144	145.159	105.287	135.056	126.736
ACSS2	119.416	146.05	90.7247	148.943	107.494	126.736
SOX2	186.588	96.5814	88.9102	92.4471	170.887	126.449
COPS6	111.953	131.916	130.644	136.103	124.031	126.449
DDX6	120.482	122.493	128.829	134.819	129.544	126.449
KTN1	100.224	122.493	114.313	132.251	209.475	126.449
SERBP1	121.549	104.826	161.49	92.4471	206.719	126.161
NTRK1	85.2973	102.47	87.0957	252.945	74.4187	126.161
GPM6A	145.005	82.4475	123.386	118.127	201.206	126.161
CTDSP1	162.065	82.4475	192.336	74.4713	143.325	125.874
PLEKHM2	141.807	117.782	139.716	124.547	82.6875	125.586
SSR2	139.674	133.094	123.386	97.583	135.056	125.586
TNS1	117.284	141.339	130.644	102.719	151.594	125.586
DUSP3	108.754	140.161	78.0232	175.906	99.2249	125.586
HP1BP3	149.27	111.893	119.757	109.139	137.812	125.299
WDR6	136.476	104.826	157.861	114.275	118.519	125.299
ARHGEF17	119.416	134.272	143.345	128.399	82.6875	125.012
AP3D1	94.8933	137.805	121.571	165.634	90.9562	125.012
GNG5	148.204	100.115	161.49	93.7311	132.3	124.724
DNER	60.7743	223.786	68.9508	151.51	85.4437	124.724
ESYT1	121.549	153.117	79.8377	145.091	88.1999	124.437
TPT1-AS1	194.051	90.6923	128.829	93.7311	82.6875	124.437
HLA-DQA1	154.601	114.249	134.273	83.4592	140.569	124.15
PAQR8	140.741	131.916	87.0957	123.263	121.275	124.15
TRIM28	173.793	90.6923	127.015	98.867	124.031	124.15
C1orf43	132.211	129.56	112.499	112.991	129.544	123.862
EPAS1	117.284	98.937	228.626	78.3232	137.812	123.862
ARRB1	105.555	140.161	83.4667	169.486	96.4687	123.862
CHP1	101.291	135.449	92.5392	152.794	140.569	123.862
EHD2	122.615	96.5814	208.667	110.423	90.9562	123.862
TMEM230	117.284	137.805	101.612	119.411	151.594	123.862
SH3BGRL	133.277	135.449	119.757	96.299	137.812	123.862
CARD19	130.078	128.383	76.2087	156.646	96.4687	123.575
POLD4	129.012	110.715	136.087	116.843	135.056	123.575
WASF2	162.065	98.937	141.53	84.7432	135.056	123.287
MFSD10	155.668	98.937	127.015	123.263	90.9562	123.287
SPCS3	121.549	131.916	114.313	139.955	85.4437	123.287
EIF3H	108.754	103.648	154.232	120.695	165.375	123.287
TM9SF3	126.88	117.782	119.757	123.263	132.3	123.287
ADIPOR2	135.409	100.115	110.684	142.523	124.031	123.287
TXNL1	97.0257	151.939	78.0232	166.918	99.2249	123.287
PTP4A2	104.489	118.96	141.53	115.559	168.131	123
SNX17	152.469	118.96	119.757	104.003	101.981	123
CHD4	139.674	109.537	132.458	101.435	143.325	123
PPFIBP1	154.601	100.115	112.499	118.127	121.275	123
HNRNPM	126.88	87.1588	132.458	130.967	165.375	123
CERS2	143.939	116.604	136.087	102.719	104.737	122.713
ARL8B	99.1581	148.406	90.7247	146.375	121.275	122.713
KLF9	138.608	100.115	143.345	101.435	148.837	122.713
PCBD1	97.0257	110.715	123.386	174.622	104.737	122.713
MYDGF	143.939	108.36	139.716	112.991	96.4687	122.713
PDZD2	142.873	110.715	99.7971	121.979	132.3	122.425
CAPN5	105.555	113.071	110.684	175.906	90.9562	122.425
CDK5RAP3	157.8	109.537	148.788	116.843	33.075	122.425
CALCOCO2	135.409	90.6923	121.571	123.263	162.619	122.425
PHB	109.82	137.805	141.53	114.275	107.494	122.425
MAP7D2	75.7014	202.585	79.8377	128.399	107.494	122.425
SEPTIN9	142.873	100.115	130.644	109.139	137.812	122.425
LMAN2	125.814	95.4036	161.49	124.547	110.25	122.138
ARHGEF10	164.197	100.115	97.9826	119.411	107.494	122.138
GIT1	119.416	126.027	125.2	129.683	99.2249	122.138
APOC2	135.409	137.805	79.8377	136.103	85.4437	122.138
H2AFV	137.542	117.782	110.684	84.7432	187.425	121.85
CALY	78.9	162.539	81.6522	170.77	93.7124	121.85
PSME2	164.197	94.2257	163.304	93.7311	74.4187	121.85
LINC01578	139.674	117.782	114.313	115.559	110.25	121.85
LAMTOR2	131.145	138.983	130.644	109.139	68.9062	121.563
SSR3	134.343	104.826	128.829	104.003	154.35	121.563
UBE2D2	110.886	131.916	101.612	129.683	137.812	121.563
ENTPD2	154.601	106.004	112.499	105.287	121.275	121.563
PHB2	129.012	116.604	130.644	109.139	126.787	121.563
XRCC5	140.741	111.893	119.757	95.015	151.594	121.276
LAMA4	148.204	93.0479	105.241	128.399	126.787	121.276
UPK3BL1	156.734	101.293	121.571	111.707	96.4687	121.276
SORBS3	166.33	68.3137	165.119	100.151	107.494	121.276
NINJ1	125.814	110.715	112.499	125.831	137.812	121.276
SLIRP	140.741	133.094	83.4667	120.695	101.981	121.276
PSMA4	97.0257	133.094	154.232	123.263	101.981	121.276
PLOD1	134.343	95.4036	161.49	96.299	137.812	120.988
SELENOF	111.953	85.981	145.159	119.411	192.937	120.988
LYNX1	88.496	134.272	79.8377	175.906	118.519	120.988
SYNM	133.277	117.782	94.3537	132.251	113.006	120.988
RNF213	138.608	106.004	165.119	100.151	88.1999	120.988
IFI30	143.939	102.47	181.449	83.4592	93.7124	120.988
FUNDC2	131.145	147.228	110.684	92.4471	110.25	120.988
CTDSP2	141.807	103.648	166.933	89.8791	101.981	120.701
SF3B2	130.078	98.937	132.458	136.103	93.7124	120.414
UQCRC2	107.688	146.05	85.2812	136.103	113.006	120.414
EWSR1	132.211	104.826	130.644	101.435	151.594	120.414
STX12	105.555	140.161	90.7247	142.523	107.494	120.126
PPT1	120.482	122.493	112.499	105.287	157.106	120.126
ARGLU1	158.866	94.2257	119.757	110.423	101.981	120.126
ILF3	136.476	95.4036	125.2	125.831	115.762	120.126
NID1	146.072	88.3366	132.458	88.5951	173.644	119.839
ATP1B3	115.151	108.36	170.562	101.435	121.275	119.839
SCD5	117.284	156.65	67.1363	138.671	79.9312	119.839
PAIP2	122.615	131.916	103.426	127.115	93.7124	119.839
DGKH	102.357	100.115	48.9913	214.426	115.762	119.839
GPS1	114.085	137.805	114.313	120.695	99.2249	119.839
CTSZ	117.284	115.427	143.345	130.967	77.175	119.839
ICMT	86.3635	133.094	83.4667	173.338	113.006	119.551
SRP9	123.681	114.249	107.055	114.275	151.594	119.551
GRAMD1B	134.343	151.939	68.9508	119.411	82.6875	119.551
SNHG14	98.0919	137.805	72.5797	148.943	140.569	119.551
GLS	86.3635	155.472	79.8377	156.646	99.2249	119.264
PNKD	139.674	122.493	117.942	115.559	68.9062	119.264
STK25	119.416	115.427	121.571	141.239	77.175	119.264
PCNP	125.814	121.316	101.612	109.139	146.081	119.264
NUDC	138.608	109.537	110.684	120.695	99.2249	118.977
CAST	106.622	115.427	110.684	119.411	170.887	118.977
EMP1	134.343	88.3366	177.82	89.8791	124.031	118.977
DHRS7	126.88	110.715	134.273	104.003	126.787	118.977
ISG15	118.35	90.6923	214.11	73.1873	137.812	118.689
FBLN2	158.866	80.0919	159.675	83.4592	118.519	118.689
SELENOK	118.35	124.849	110.684	112.991	129.544	118.689
SH3BP2	142.873	82.4475	166.933	106.571	93.7124	118.689
PAXX	133.277	95.4036	141.53	116.843	104.737	118.689
STIP1	108.754	114.249	97.9826	142.523	135.056	118.689
ITFG1	108.754	131.916	76.2087	152.794	104.737	118.689
PTBP1	157.8	94.2257	156.046	95.015	68.9062	118.689
SSBP4	135.409	82.4475	183.264	102.719	96.4687	118.689
USP11	123.681	114.249	103.426	139.955	93.7124	118.689
MZT2A	109.82	138.983	83.4667	136.103	107.494	118.402
CUEDC2	119.416	123.671	107.055	118.127	121.275	118.402
ALKBH7	118.35	126.027	107.055	118.127	118.519	118.402
IRF2BP2	148.204	96.5814	123.386	109.139	101.981	118.114
BCAM	97.0257	129.56	96.1682	139.955	132.3	118.114
GASK1B	139.674	91.8701	137.902	107.855	115.762	118.114
CCT3	113.019	108.36	103.426	146.375	113.006	117.827
ANK3	127.946	116.604	88.9102	129.683	113.006	117.827
ARHGDIG	85.2973	127.205	78.0232	192.598	79.9312	117.827
TMEM256	133.277	117.782	117.942	119.411	74.4187	117.827
H1F0	152.469	96.5814	112.499	101.435	121.275	117.827
PDIA4	146.072	71.8471	188.707	74.4713	135.056	117.54
ADD3	126.88	98.937	110.684	98.867	187.425	117.54
SLC2A3	97.0257	127.205	92.5392	152.794	110.25	117.54
SHISA4	109.82	126.027	78.0232	138.671	129.544	117.252
NAGK	113.019	108.36	136.087	119.411	115.762	117.252
TPM2	132.211	82.4475	199.594	86.0271	101.981	117.252
ALOX5AP	114.085	110.715	148.788	95.015	140.569	117.252
G3BP2	87.4297	126.027	92.5392	159.214	118.519	116.965
ARHGDIB	111.953	120.138	152.417	79.6072	148.837	116.965
SLC38A10	132.211	104.826	150.603	95.015	101.981	116.965
RRBP1	137.542	95.4036	143.345	98.867	113.006	116.965
RTRAF	120.482	104.826	110.684	121.979	135.056	116.965
SRM	106.622	102.47	152.417	128.399	96.4687	116.678
SPCS1	136.476	128.383	107.055	89.8791	110.25	116.678
DDR1	160.999	84.8032	121.571	110.423	82.6875	116.678
AZIN1	104.489	134.272	87.0957	121.979	140.569	116.678
CPNE6	77.8338	209.652	58.0638	115.559	90.9562	116.678
GNAO1	59.7081	138.983	65.3218	208.006	93.7124	116.678
MGP	98.0919	101.293	206.852	83.4592	132.3	116.39
NUDT4	95.9595	116.604	101.612	151.51	115.762	116.39
PNPLA6	131.145	104.826	87.0957	147.659	82.6875	116.39
SGK1	108.754	115.427	128.829	120.695	107.494	116.103
TMEM248	106.622	109.537	116.128	134.819	115.762	116.103
TAF10	116.218	97.7592	143.345	116.843	115.762	116.103
PABPN1	142.873	93.0479	112.499	121.979	93.7124	116.103
METTL26	131.145	95.4036	143.345	106.571	104.737	116.103
CLPTM1	118.35	114.249	116.128	127.115	90.9562	116.103
CAMLG	86.3635	144.872	79.8377	146.375	113.006	115.815
IDH3B	118.35	129.56	97.9826	123.263	88.1999	115.815
CMPK1	94.8933	135.449	96.1682	130.967	118.519	115.528
GRHPR	129.012	141.339	96.1682	92.4471	99.2249	115.528
HRAS	76.7676	151.939	87.0957	161.782	74.4187	115.528
MBNL1	119.416	110.715	87.0957	118.127	151.594	115.241
NAT8L	97.0257	177.851	63.5073	111.707	101.981	115.241
CDKN1A	107.688	109.537	161.49	106.571	96.4687	115.241
SNX10	74.6351	144.872	70.7652	170.77	99.2249	115.241
TMEM120A	125.814	122.493	114.313	111.707	79.9312	115.241
MLEC	140.741	108.36	99.7971	98.867	124.031	115.241
COX7A1	103.423	97.7592	154.232	101.435	157.106	115.241
PSMC4	115.151	120.138	83.4667	130.967	118.519	115.241
CCT6A	97.0257	124.849	123.386	119.411	115.762	114.953
DHCR7	99.1581	114.249	76.2087	169.486	99.2249	114.953
DLGAP4	124.747	114.249	105.241	128.399	77.175	114.953
PIGT	124.747	106.004	130.644	112.991	90.9562	114.953
NAA10	138.608	96.5814	107.055	110.423	118.519	114.953
FOXD3	148.204	81.2697	130.644	92.4471	129.544	114.666
CHMP5	100.224	116.604	134.273	110.423	126.787	114.666
EGLN2	110.886	116.604	125.2	123.263	85.4437	114.666
ACTR3	94.8933	133.094	65.3218	139.955	140.569	114.378
EHBP1L1	132.211	87.1588	166.933	88.5951	107.494	114.378
FAM219B	123.681	117.782	79.8377	142.523	74.4187	114.378
CLCN7	147.138	120.138	90.7247	107.855	66.15	114.378
PDCD5	106.622	129.56	94.3537	137.387	79.9312	114.378
MXD4	121.549	93.0479	121.571	121.979	115.762	114.091
PDGFRB	131.145	91.8701	163.304	91.1631	96.4687	114.091
UBQLN1	94.8933	146.05	85.2812	125.831	107.494	114.091
ARFGAP2	122.615	102.47	103.426	125.831	110.25	114.091
AKAP6	85.2973	159.006	74.3942	136.103	96.4687	114.091
MAN2C1	143.939	84.8032	145.159	114.275	57.8812	114.091
PER1	154.601	78.914	146.974	87.3111	99.2249	114.091
GADD45A	67.1716	133.094	68.9508	186.178	101.981	113.804
ACAT2	97.0257	121.316	58.0638	183.61	74.4187	113.804
ELOC	89.5622	144.872	105.241	119.411	104.737	113.804
TBX2	147.138	91.8701	136.087	87.3111	101.981	113.804
PRELP	90.6284	73.0249	261.287	57.7794	162.619	113.516
PRRC2B	120.482	100.115	121.571	118.127	104.737	113.516
ABLIM1	103.423	115.427	101.612	134.819	107.494	113.516
CNTN1	91.6946	144.872	79.8377	132.251	107.494	113.516
MMP28	159.932	74.2028	108.87	114.275	90.9562	113.516
MARCH2	124.747	114.249	112.499	114.275	82.6875	113.516
SNRPG	139.674	101.293	141.53	82.1752	96.4687	113.229
RTKN	159.932	96.5814	90.7247	112.991	66.15	113.229
CTSL	114.085	80.0919	143.345	125.831	115.762	113.229
ARHGEF40	138.608	102.47	123.386	102.719	79.9312	113.229
SLC16A3	98.0919	143.694	103.426	116.843	88.1999	113.229
ERGIC3	122.615	115.427	123.386	111.707	71.6625	113.229
SCCPDH	118.35	103.648	85.2812	115.559	157.106	112.942
PREPL	94.8933	127.205	83.4667	143.807	104.737	112.942
TCP1	101.291	147.228	67.1363	120.695	115.762	112.942
SND1	130.078	98.937	134.273	105.287	85.4437	112.942
TNS2	126.88	91.8701	165.119	96.299	82.6875	112.942
VPS29	110.886	115.427	87.0957	133.535	107.494	112.942
TERF2IP	92.7608	121.316	92.5392	136.103	126.787	112.942
SPHK1	172.727	85.981	130.644	82.1752	60.6375	112.942
CIC	132.211	94.2257	116.128	106.571	115.762	112.942
RANGAP1	107.688	127.205	101.612	127.115	79.9312	112.942
IMPDH2	109.82	95.4036	145.159	91.1631	157.106	112.654
LMBRD1	135.409	114.249	117.942	89.8791	90.9562	112.654
RAD23B	99.1581	116.604	97.9826	121.979	140.569	112.654
POLR2A	104.489	117.782	123.386	118.127	93.7124	112.654
HSPB6	88.496	181.385	121.571	56.4954	121.275	112.654
AXL	129.012	91.8701	134.273	92.4471	129.544	112.654
ZFAS1	121.549	87.1588	148.788	80.8912	162.619	112.654
AHSA1	110.886	129.56	96.1682	116.843	90.9562	112.367
MAZ	100.224	118.96	139.716	115.559	79.9312	112.367
AARS	105.555	122.493	121.571	112.991	90.9562	112.367
MTLN	116.218	138.983	112.499	83.4592	101.981	112.367
CCL3	143.939	98.937	78.0232	127.115	79.9312	112.079
AP1M1	95.9595	136.627	81.6522	129.683	104.737	112.079
ARPC1A	117.284	108.36	101.612	118.127	107.494	111.792
YBX3	119.416	78.914	176.006	71.9033	157.106	111.792
MAPK1	101.291	106.004	99.7971	123.263	146.081	111.792
VEGFB	121.549	123.671	117.942	87.3111	99.2249	111.505
PGM2L1	88.496	104.826	68.9508	181.042	101.981	111.505
CYB5A	116.218	111.893	103.426	98.867	137.812	111.505
CAB39	93.827	136.627	78.0232	128.399	110.25	111.217
HCLS1	106.622	103.648	156.046	86.0271	126.787	111.217
TMEM165	122.615	117.782	92.5392	109.139	99.2249	111.217
SAP30BP	122.615	106.004	110.684	115.559	85.4437	111.217
CYFIP2	101.291	107.182	74.3942	160.498	93.7124	110.93
AFAP1L2	150.336	82.4475	107.055	93.7311	118.519	110.93
TIMM8B	122.615	109.537	90.7247	121.979	90.9562	110.93
CTDNEP1	126.88	106.004	116.128	97.583	101.981	110.93
NDUFA12	115.151	118.96	119.757	106.571	74.4187	110.643
CORO1A	125.814	87.1588	137.902	101.435	104.737	110.643
CD68	126.88	90.6923	161.49	77.0392	110.25	110.643
CENPX	122.615	107.182	108.87	112.991	85.4437	110.643
RAB10	113.019	103.648	105.241	111.707	124.031	110.355
TNS3	157.8	91.8701	112.499	78.3232	96.4687	110.355
CTSC	125.814	91.8701	165.119	61.6314	135.056	110.355
C7	99.1581	71.8471	230.441	59.0634	154.35	110.068
POLR2G	133.277	91.8701	107.055	118.127	79.9312	110.068
ATL3	95.9595	116.604	103.426	125.831	107.494	110.068
VPS51	102.357	127.205	123.386	104.003	82.6875	110.068
RTN2	103.423	134.272	72.5797	134.819	74.4187	110.068
IL13RA1	107.688	90.6923	119.757	123.263	118.519	110.068
PNPLA2	131.145	104.826	117.942	105.287	63.3937	109.78
AOPEP	137.542	80.0919	114.313	102.719	115.762	109.78
ARL3	105.555	134.272	76.2087	115.559	99.2249	109.493
SPRYD3	103.423	126.027	94.3537	109.139	110.25	109.493
PGP	78.9	138.983	74.3942	152.794	79.9312	109.493
EMP2	111.953	107.182	112.499	109.139	104.737	109.493
KPNB1	107.688	96.5814	107.055	119.411	126.787	109.493
MT-RNR2	81.0324	146.05	110.684	109.139	96.4687	109.493
FAAP20	135.409	89.5144	116.128	105.287	85.4437	109.206
SCAMP3	123.681	90.6923	103.426	129.683	79.9312	109.206
BZW1	122.615	100.115	108.87	98.867	118.519	109.206
SAR1A	114.085	108.36	99.7971	110.423	110.25	109.206
CYFIP1	132.211	88.3366	108.87	96.299	126.787	109.206
CTSH	115.151	71.8471	197.78	82.1752	104.737	109.206
HERPUD1	98.0919	114.249	125.2	107.855	104.737	109.206
G6PC3	105.555	131.916	87.0957	107.855	101.981	109.206
RAD23A	102.357	98.937	128.829	102.719	135.056	109.206
CHMP2A	117.284	100.115	110.684	97.583	132.3	109.206
ERI3	88.496	110.715	121.571	125.831	101.981	108.918
BCL6	122.615	93.0479	125.2	93.7311	118.519	108.918
LDLR	118.35	110.715	74.3942	127.115	93.7124	108.918
PRELID1	116.218	114.249	114.313	93.7311	99.2249	108.631
GLO1	105.555	114.249	92.5392	111.707	121.275	108.631
CPNE3	95.9595	114.249	83.4667	121.979	137.812	108.631
CNPY2	120.482	102.47	101.612	109.139	101.981	108.631
NDUFAF8	111.953	115.427	85.2812	114.275	107.494	108.631
APC2	110.886	122.493	58.0638	139.955	79.9312	108.631
CCDC124	103.423	109.537	139.716	106.571	77.175	108.631
SUSD2	68.2378	203.763	85.2812	74.4713	99.2249	108.631
INTS11	134.343	91.8701	112.499	102.719	85.4437	108.343
RGL1	108.754	107.182	103.426	116.843	99.2249	108.343
SERP1	125.814	90.6923	108.87	102.719	115.762	108.343
HNRNPH3	126.88	89.5144	116.128	95.015	121.275	108.343
LIPA	113.019	117.782	107.055	91.1631	113.006	108.343
GAL	57.5757	91.8701	50.8058	241.39	79.9312	108.343
RAP1B	115.151	98.937	117.942	100.151	115.762	108.343
PSMC6	91.6946	142.516	83.4667	98.867	129.544	108.343
SHC2	95.9595	120.138	70.7652	148.943	82.6875	108.343
MRPS6	123.681	97.7592	97.9826	120.695	82.6875	108.343
PLEKHO1	111.953	103.648	110.684	111.707	96.4687	108.056
CADPS	74.6351	136.627	52.6203	169.486	79.9312	108.056
KIF3A	78.9	151.939	58.0638	129.683	110.25	108.056
TAF7	103.423	111.893	107.055	95.015	140.569	108.056
MTDH	117.284	100.115	117.942	92.4471	121.275	108.056
CAMTA1	94.8933	118.96	76.2087	134.819	104.737	107.769
VAMP5	138.608	77.7362	150.603	71.9033	110.25	107.769
CBX6	121.549	88.3366	117.942	97.583	124.031	107.769
ZMIZ1	118.35	93.0479	105.241	102.719	126.787	107.481
MFSD12	136.476	89.5144	108.87	100.151	88.1999	107.481
RAB3A	72.5027	197.874	52.6203	98.867	88.1999	107.481
NONO	116.218	98.937	128.829	70.6193	151.594	107.481
SGCB	147.138	82.4475	92.5392	97.583	104.737	107.194
MAP3K11	136.476	83.6253	134.273	93.7311	74.4187	107.194
ADRM1	92.7608	118.96	110.684	112.991	99.2249	107.194
ELAVL4	65.0392	120.138	38.1044	190.03	110.25	106.907
SRSF11	121.549	89.5144	110.684	95.015	129.544	106.907
CDC42SE1	123.681	85.981	148.788	91.1631	82.6875	106.907
COPA	105.555	134.272	74.3942	102.719	104.737	106.907
ATRAID	114.085	88.3366	105.241	100.151	148.837	106.907
ITGA6	137.542	76.5584	130.644	61.6314	159.862	106.907
TRIM36	72.5027	154.295	58.0638	138.671	90.9562	106.907
CIB1	102.357	98.937	123.386	116.843	90.9562	106.907
COLGALT1	121.549	81.2697	145.159	97.583	90.9562	106.907
MFSD2A	122.615	130.738	52.6203	106.571	90.9562	106.619
UFC1	87.4297	122.493	65.3218	134.819	121.275	106.619
AGT	91.6946	123.671	136.087	84.7432	107.494	106.619
VAMP8	105.555	103.648	146.974	89.8791	90.9562	106.619
ABTB1	110.886	103.648	114.313	106.571	90.9562	106.619
HMGCR	79.9662	107.182	68.9508	164.35	107.494	106.619
CYHR1	123.681	106.004	145.159	83.4592	55.125	106.619
LASP1	121.549	81.2697	107.055	107.855	124.031	106.619
TMEM205	123.681	101.293	96.1682	96.299	113.006	106.619
SUGP2	113.019	127.205	85.2812	105.287	77.175	106.619
UHMK1	83.1649	159.006	59.8783	110.423	104.737	106.332
HADHB	118.35	91.8701	97.9826	118.127	96.4687	106.332
NFE2L2	113.019	95.4036	108.87	79.6072	168.131	106.332
RBM5	133.277	87.1588	117.942	101.435	74.4187	106.332
PSMA2	87.4297	109.537	112.499	129.683	88.1999	106.332
MEGF9	136.476	103.648	67.1363	104.003	99.2249	106.332
GFAP	141.807	87.1588	132.458	66.7673	104.737	106.332
PEF1	77.8338	128.383	116.128	129.683	60.6375	106.044
SNHG8	104.489	102.47	121.571	87.3111	135.056	106.044
PCOLCE	117.284	73.0249	188.707	55.2114	137.812	106.044
OLFML2A	129.012	107.182	88.9102	82.1752	121.275	106.044
MRPL28	106.622	115.427	90.7247	120.695	74.4187	106.044
SAMD4B	146.072	74.2028	94.3537	89.8791	129.544	106.044
ITPRID2	136.476	78.914	128.829	80.8912	110.25	106.044
RBM8A	116.218	94.2257	112.499	98.867	110.25	105.757
EMC3	85.2973	126.027	108.87	111.707	93.7124	105.757
TGFBI	109.82	71.8471	205.038	69.3353	101.981	105.757
RAB18	94.8933	128.383	74.3942	120.695	96.4687	105.757
PAPOLA	115.151	96.5814	128.829	83.4592	115.762	105.757
AP2A1	107.688	126.027	81.6522	107.855	85.4437	105.757
COL16A1	110.886	82.4475	116.128	134.819	66.15	105.47
CTNND1	122.615	101.293	96.1682	92.4471	113.006	105.47
MMP2	97.0257	78.914	176.006	78.3232	140.569	105.47
SAT2	117.284	94.2257	117.942	98.867	96.4687	105.47
RCAN1	120.482	108.36	107.055	88.5951	93.7124	105.47
RER1	121.549	97.7592	96.1682	102.719	99.2249	105.182
HARS	88.496	116.604	72.5797	142.523	90.9562	105.182
CCT8	94.8933	124.849	88.9102	123.263	71.6625	105.182
GPR37L1	127.946	108.36	79.8377	95.015	96.4687	104.895
SEC62	107.688	102.47	92.5392	80.8912	173.644	104.895
SNAP91	65.0392	148.406	41.7333	166.918	68.9062	104.895
BANF1	121.549	91.8701	107.055	88.5951	124.031	104.895
STRAP	88.496	115.427	74.3942	151.51	68.9062	104.895
STAT6	114.085	96.5814	137.902	83.4592	96.4687	104.895
AMFR	113.019	97.7592	97.9826	115.559	88.1999	104.895
RAB11B	77.8338	110.715	90.7247	150.226	85.4437	104.895
NDRG3	75.7014	157.828	61.6928	116.843	96.4687	104.895
UROD	106.622	111.893	87.0957	120.695	74.4187	104.607
IP6K2	124.747	90.6923	96.1682	116.843	71.6625	104.607
ATP5F1C	100.224	117.782	78.0232	114.275	104.737	104.607
ST6GALNAC6	107.688	101.293	117.942	100.151	90.9562	104.32
RABL6	95.9595	101.293	112.499	114.275	99.2249	104.32
RCN1	119.416	80.0919	110.684	96.299	129.544	104.32
CALB2	88.496	104.826	48.9913	184.894	55.125	104.32
MKNK2	129.012	69.4915	110.684	97.583	126.787	104.32
PGLS	104.489	80.0919	108.87	137.387	82.6875	104.32
TMEM9	107.688	100.115	96.1682	110.423	101.981	104.033
RNF13	105.555	108.36	74.3942	102.719	137.812	104.033
ITPR3	147.138	74.2028	110.684	100.151	60.6375	104.033
ANP32B	126.88	69.4915	114.313	92.4471	135.056	104.033
GLUD1	94.8933	111.893	94.3537	110.423	110.25	104.033
EML3	132.211	77.7362	143.345	79.6072	85.4437	104.033
IRF9	126.88	82.4475	116.128	101.435	82.6875	104.033
NRXN3	127.946	85.981	63.5073	111.707	129.544	104.033
ECH1	109.82	114.249	101.612	100.151	77.175	104.033
ARHGAP35	121.549	118.96	65.3218	95.015	101.981	104.033
CENPB	105.555	80.0919	130.644	84.7432	157.106	104.033
PROS1	127.946	71.8471	125.2	86.0271	121.275	103.745
AGPAT1	106.622	87.1588	105.241	118.127	101.981	103.745
PLOD3	148.204	74.2028	119.757	71.9033	101.981	103.745
SNHG7	109.82	97.7592	141.53	93.7311	66.15	103.745
GARS	72.5027	129.56	63.5073	141.239	101.981	103.458
FGL2	95.9595	107.182	114.313	89.8791	126.787	103.458
NDUFA5	78.9	116.604	78.0232	139.955	96.4687	103.458
FKBP3	90.6284	138.983	72.5797	115.559	74.4187	103.458
SERPINA1	118.35	104.826	92.5392	98.867	88.1999	103.458
NPEPPS	97.0257	109.537	78.0232	129.683	88.1999	103.458
BTBD2	99.1581	94.2257	97.9826	127.115	93.7124	103.458
SNHG32	85.2973	91.8701	136.087	109.139	115.762	103.458
PTPN18	125.814	82.4475	123.386	89.8791	90.9562	103.171
FKBP9	116.218	111.893	92.5392	83.4592	107.494	103.171
UBE2Z	89.5622	107.182	110.684	109.139	104.737	103.171
MBOAT7	100.224	95.4036	81.6522	145.091	71.6625	103.171
TAFA5	130.078	96.5814	88.9102	98.867	79.9312	103.171
FLNB	133.277	82.4475	119.757	82.1752	90.9562	102.883
CLIP2	91.6946	117.782	63.5073	130.967	96.4687	102.883
DYNC1I1	66.1054	140.161	65.3218	138.671	90.9562	102.883
LTBR	117.284	74.2028	130.644	98.867	99.2249	102.883
PWWP3A	122.615	91.8701	88.9102	112.991	77.175	102.883
ANGPTL7	131.145	75.3806	119.757	62.9154	151.594	102.596
LGI3	83.1649	166.073	54.4348	104.003	74.4187	102.596
HGS	109.82	87.1588	101.612	121.979	79.9312	102.596
RBIS	113.019	108.36	97.9826	80.8912	115.762	102.596
CAPZA1	91.6946	74.2028	148.788	110.423	107.494	102.308
TSPYL1	77.8338	120.138	78.0232	145.091	68.9062	102.308
IST1	123.681	103.648	94.3537	96.299	68.9062	102.308
LUC7L3	118.35	91.8701	96.1682	97.583	104.737	102.308
NPLOC4	95.9595	135.449	76.2087	104.003	77.175	102.308
KDELR1	115.151	96.5814	108.87	98.867	79.9312	102.308
GFRA3	108.754	77.7362	108.87	114.275	104.737	102.021
NRCAM	85.2973	117.782	50.8058	148.943	85.4437	102.021
TPM1	93.827	113.071	119.757	92.4471	90.9562	102.021
SEC11A	111.953	87.1588	116.128	86.0271	124.031	102.021
CNDP2	90.6284	97.7592	117.942	105.287	110.25	102.021
ILF2	113.019	88.3366	112.499	102.719	85.4437	101.734
CRTAP	117.284	71.8471	123.386	87.3111	129.544	101.734
NUDCD3	97.0257	97.7592	76.2087	125.831	110.25	101.734
GRASP	121.549	87.1588	141.53	79.6072	71.6625	101.734
AVIL	71.4365	133.094	39.9189	160.498	74.4187	101.734
PXN	109.82	87.1588	127.015	100.151	79.9312	101.734
MIEN1	89.5622	118.96	74.3942	134.819	63.3937	101.734
SPAG9	110.886	96.5814	94.3537	101.435	101.981	101.734
SDC3	118.35	98.937	79.8377	104.003	90.9562	101.446
PRRC2A	105.555	88.3366	108.87	106.571	99.2249	101.446
RALBP1	100.224	104.826	90.7247	82.1752	154.35	101.446
HMGN3	121.549	95.4036	78.0232	105.287	88.1999	101.159
COBL	123.681	91.8701	76.2087	101.435	101.981	101.159
SYBU	78.9	136.627	65.3218	120.695	88.1999	101.159
RHOG	117.284	83.6253	132.458	77.0392	104.737	101.159
CAPRIN1	98.0919	110.715	78.0232	114.275	93.7124	101.159
VPS4A	94.8933	114.249	76.2087	116.843	90.9562	101.159
RTCA	77.8338	118.96	67.1363	147.659	68.9062	100.871
ENSA	95.9595	91.8701	119.757	111.707	82.6875	100.871
PSMD1	77.8338	109.537	85.2812	123.263	115.762	100.871
CLDN11	127.946	69.4915	145.159	59.0634	126.787	100.871
STMN4	57.5757	108.36	59.8783	184.894	77.175	100.871
RNF167	105.555	101.293	105.241	93.7311	96.4687	100.871
MLLT6	123.681	90.6923	117.942	69.3353	107.494	100.871
TTC3	92.7608	102.47	81.6522	105.287	137.812	100.871
S100A16	134.343	93.0479	127.015	56.4954	85.4437	100.584
RAB5A	111.953	96.5814	97.9826	91.1631	104.737	100.584
ATP2C1	88.496	102.47	72.5797	132.251	101.981	100.584
IFNGR1	94.8933	83.6253	128.829	84.7432	146.081	100.584
GRK2	118.35	78.914	121.571	101.435	71.6625	100.584
SNX6	108.754	76.5584	117.942	91.1631	129.544	100.584
PGD	75.7014	103.648	74.3942	133.535	124.031	100.297
FGF1	87.4297	140.161	90.7247	84.7432	88.1999	100.297
VOPP1	94.8933	94.2257	103.426	105.287	113.006	100.297
SEMA3C	148.204	77.7362	103.426	64.1994	101.981	100.297
SLC1A5	108.754	80.0919	123.386	80.8912	132.3	100.297
SIPA1	116.218	71.8471	136.087	93.7311	82.6875	100.009
PIP5K1C	94.8933	101.293	85.2812	116.843	96.4687	100.009
RAP1A	111.953	76.5584	99.7971	84.7432	154.35	99.722
ATP6V1A	90.6284	122.493	54.4348	133.535	66.15	99.722
MICAL1	130.078	61.2467	127.015	101.435	66.15	99.722
LMF2	117.284	85.981	114.313	86.0271	93.7124	99.722
SLC25A5	86.3635	104.826	87.0957	98.867	143.325	99.722
PPP3CB	91.6946	130.738	48.9913	118.127	82.6875	99.4346
SBNO2	105.555	77.7362	119.757	120.695	57.8812	99.4346
RAB3D	68.2378	133.094	67.1363	132.251	79.9312	99.4346
B4GALT2	78.9	93.0479	70.7652	157.93	82.6875	99.1472
NUDT16	94.8933	95.4036	121.571	91.1631	101.981	99.1472
AMD1	89.5622	91.8701	94.3537	111.707	121.275	99.1472
MADD	109.82	101.293	96.1682	97.583	74.4187	99.1472
OAF	120.482	60.0689	134.273	82.1752	118.519	99.1472
SCG5	47.9797	155.472	21.7739	166.918	71.6625	99.1472
PIRT	75.7014	95.4036	48.9913	168.202	96.4687	99.1472
PRKCA	122.615	74.2028	90.7247	101.435	104.737	99.1472
MED15	103.423	95.4036	94.3537	109.139	82.6875	99.1472
CDK16	106.622	102.47	79.8377	120.695	55.125	99.1472
VCL	116.218	78.914	107.055	89.8791	107.494	98.8598
HIF1A	84.2311	97.7592	110.684	89.8791	140.569	98.8598
IMMT	88.496	115.427	99.7971	92.4471	96.4687	98.5724
MFSD1	88.496	90.6923	130.644	106.571	77.175	98.5724
EIF3A	87.4297	83.6253	99.7971	98.867	159.862	98.5724
UBE2I	135.409	77.7362	87.0957	84.7432	99.2249	98.5724
PEMT	84.2311	106.004	79.8377	123.263	93.7124	98.5724
PCYT2	99.1581	100.115	85.2812	119.411	68.9062	98.5724
DBNDD2	97.0257	108.36	94.3537	93.7311	96.4687	98.5724
DUSP23	99.1581	98.937	110.684	98.867	74.4187	98.285
KIDINS220	107.688	88.3366	81.6522	101.435	115.762	98.285
TMEM14C	92.7608	115.427	94.3537	100.151	74.4187	98.285
CASKIN2	111.953	91.8701	123.386	69.3353	101.981	98.285
TMEM50B	98.0919	89.5144	114.313	105.287	79.9312	98.285
OGT	130.078	67.1358	107.055	95.015	82.6875	98.285
RGS4	86.3635	70.6693	58.0638	182.326	71.6625	97.9977
TIMM17A	68.2378	127.205	94.3537	110.423	85.4437	97.9977
LTBP1	132.211	85.981	79.8377	69.3353	126.787	97.9977
SRI	120.482	67.1358	87.0957	114.275	93.7124	97.9977
KIF5B	84.2311	102.47	96.1682	88.5951	146.081	97.9977
SESN3	138.608	83.6253	87.0957	74.4713	93.7124	97.9977
PRR13	98.0919	98.937	90.7247	120.695	57.8812	97.9977
GOT2	71.4365	130.738	56.2493	127.115	90.9562	97.9977
CNTNAP1	93.827	91.8701	52.6203	155.362	68.9062	97.9977
LONP1	94.8933	90.6923	107.055	104.003	96.4687	97.9977
GSTM3	85.2973	115.427	85.2812	110.423	79.9312	97.7103
CXXC5	125.814	76.5584	103.426	80.8912	101.981	97.7103
PPP2R2B	89.5622	118.96	48.9913	119.411	96.4687	97.7103
GSDMD	137.542	75.3806	139.716	61.6314	60.6375	97.7103
ARPC5L	86.3635	118.96	76.2087	106.571	90.9562	97.7103
SSNA1	98.0919	110.715	72.5797	114.275	68.9062	97.7103
FGFBP3	94.8933	108.36	38.1044	123.263	115.762	97.7103
TNFAIP2	115.151	78.914	105.241	104.003	71.6625	97.7103
SIRT2	105.555	91.8701	107.055	91.1631	90.9562	97.7103
TMEM160	87.4297	108.36	121.571	86.0271	88.1999	97.7103
REXO2	84.2311	117.782	67.1363	121.979	77.175	97.4229
RAB15	71.4365	108.36	58.0638	160.498	63.3937	97.4229
BBS2	110.886	87.1588	81.6522	107.855	88.1999	97.4229
MYO15B	137.542	62.4245	123.386	92.4471	46.8562	97.4229
ZNF358	116.218	74.2028	108.87	93.7311	93.7124	97.4229
IFNAR1	93.827	110.715	90.7247	96.299	88.1999	97.4229
MPST	126.88	62.4245	107.055	89.8791	104.737	97.4229
COL12A1	136.476	82.4475	110.684	71.9033	63.3937	97.1355
POLR2J	93.827	103.648	112.499	74.4713	115.762	97.1355
PPP1R14B	105.555	82.4475	134.273	78.3232	93.7124	97.1355
MRPS34	95.9595	97.7592	88.9102	104.003	96.4687	97.1355
BEX4	91.6946	95.4036	70.7652	120.695	104.737	97.1355
VAMP3	114.085	87.1588	101.612	89.8791	82.6875	96.8481
ALPL	97.0257	101.293	108.87	96.299	68.9062	96.8481
CLASP1	74.6351	124.849	61.6928	121.979	88.1999	96.8481
ARHGEF26	127.946	65.958	78.0232	95.015	121.275	96.8481
MARVELD1	130.078	76.5584	87.0957	91.1631	85.4437	96.8481
MRGPRE	76.7676	116.604	83.4667	112.991	88.1999	96.8481
HMGN1	104.489	74.2028	105.241	83.4592	146.081	96.8481
EIF3D	104.489	88.3366	110.684	73.1873	126.787	96.8481
PFDN2	76.7676	104.826	87.0957	118.127	96.4687	96.5607
ACTR1B	114.085	81.2697	81.6522	116.843	66.15	96.5607
PPP1R7	76.7676	102.47	103.426	114.275	85.4437	96.5607
TLE1	121.549	100.115	94.3537	75.7552	71.6625	96.5607
MAN1B1	99.1581	100.115	83.4667	91.1631	113.006	96.5607
BNIP3L	115.151	76.5584	85.2812	89.8791	124.031	96.2734
TMEM109	101.291	84.8032	152.417	59.0634	104.737	96.2734
ACAT1	88.496	108.36	94.3537	87.3111	110.25	96.2734
SCN4B	65.0392	157.828	36.2899	107.855	99.2249	96.2734
EPS15	89.5622	115.427	78.0232	97.583	90.9562	95.986
ANAPC5	116.218	95.4036	101.612	82.1752	66.15	95.986
CRK	92.7608	88.3366	78.0232	104.003	132.3	95.986
MINK1	115.151	85.981	85.2812	96.299	85.4437	95.986
TMEM147	116.218	82.4475	101.612	79.6072	101.981	95.986
NDUFV3	74.6351	127.205	101.612	87.3111	88.1999	95.986
CSNK1E	117.284	68.3137	107.055	104.003	71.6625	95.986
PDE4DIP	99.1581	107.182	79.8377	100.151	74.4187	95.6986
DEGS1	101.291	88.3366	99.7971	96.299	90.9562	95.6986
MRPL55	84.2311	118.96	90.7247	93.7311	82.6875	95.6986
HNRNPAB	95.9595	77.7362	123.386	101.435	82.6875	95.6986
SERPINH1	95.9595	71.8471	134.273	87.3111	110.25	95.6986
SRSF9	86.3635	91.8701	96.1682	102.719	113.006	95.6986
RNF10	77.8338	89.5144	97.9826	119.411	101.981	95.6986
DAZAP1	102.357	78.914	112.499	98.867	85.4437	95.6986
ADAMTS1	72.5027	70.6693	244.957	47.5075	90.9562	95.6986
GNAQ	101.291	97.7592	68.9508	112.991	77.175	95.4112
ATP2A2	104.489	102.47	87.0957	91.1631	77.175	95.4112
DEF8	104.489	96.5814	72.5797	109.139	74.4187	95.4112
EIF2S2	87.4297	97.7592	94.3537	97.583	107.494	95.4112
ELOVL1	108.754	84.8032	108.87	95.015	63.3937	95.1238
TFG	58.6419	104.826	90.7247	124.547	110.25	95.1238
PTPRZ1	115.151	96.5814	65.3218	89.8791	96.4687	95.1238
CALU	91.6946	69.4915	143.345	82.1752	118.519	95.1238
UBE2V2	94.8933	114.249	67.1363	101.435	79.9312	95.1238
POLR2K	88.496	110.715	87.0957	102.719	71.6625	95.1238
DNM1L	76.7676	93.0479	74.3942	125.831	113.006	95.1238
TPCN1	100.224	115.427	81.6522	96.299	52.3687	95.1238
MYO9B	107.688	65.958	136.087	97.583	63.3937	95.1238
CDC42EP5	117.284	91.8701	94.3537	79.6072	79.9312	95.1238
PRKCZ	89.5622	102.47	52.6203	143.807	49.6125	94.8364
LAMC1	124.747	62.4245	99.7971	93.7311	88.1999	94.8364
ADH5	106.622	80.0919	108.87	89.8791	88.1999	94.8364
ERBIN	126.88	75.3806	92.5392	71.9033	110.25	94.8364
SCRN1	100.224	97.7592	72.5797	101.435	93.7124	94.8364
GOLM1	58.6419	89.5144	76.2087	169.486	68.9062	94.8364
NDUFS3	91.6946	120.138	94.3537	84.7432	66.15	94.8364
C18orf32	75.7014	116.604	79.8377	114.275	74.4187	94.8364
SPINT2	87.4297	101.293	67.1363	119.411	88.1999	94.8364
CD46	100.224	88.3366	97.9826	100.151	77.175	94.5491
SYN2	66.1054	133.094	59.8783	112.991	90.9562	94.5491
CRAT	78.9	110.715	83.4667	118.127	63.3937	94.5491
ARHGAP1	108.754	74.2028	94.3537	104.003	85.4437	94.5491
LARP6	72.5027	106.004	61.6928	146.375	63.3937	94.5491
TNFSF13	101.291	94.2257	108.87	77.0392	93.7124	94.5491
TCEA2	88.496	98.937	90.7247	107.855	77.175	94.5491
RBFOX2	75.7014	103.648	87.0957	114.275	90.9562	94.5491
MT-ND4L	71.4365	104.826	94.3537	65.4833	192.937	94.5491
RALA	54.377	113.071	70.7652	138.671	93.7124	94.2617
PRCP	102.357	98.937	90.7247	80.8912	96.4687	94.2617
AP3S2	72.5027	118.96	65.3218	123.263	74.4187	94.2617
TMEM208	76.7676	124.849	78.0232	106.571	66.15	94.2617
EIF2S3	103.423	89.5144	92.5392	75.7552	124.031	94.2617
DMD	117.284	78.914	99.7971	69.3353	115.762	94.2617
CYP27A1	117.284	75.3806	108.87	74.4713	96.4687	93.9743
STX7	102.357	95.4036	79.8377	96.299	85.4437	93.9743
MRPL27	79.9662	122.493	94.3537	91.1631	68.9062	93.9743
NDUFA7	72.5027	124.849	76.2087	107.855	74.4187	93.9743
LAIR1	101.291	89.5144	125.2	79.6072	68.9062	93.9743
TMEM50A	97.0257	80.0919	103.426	84.7432	121.275	93.6869
PMVK	101.291	89.5144	78.0232	110.423	71.6625	93.6869
CYCS	78.9	98.937	85.2812	110.423	96.4687	93.6869
CAV1	87.4297	81.2697	125.2	87.3111	104.737	93.6869
DNAJB6	89.5622	93.0479	92.5392	92.4471	110.25	93.6869
FNTA	116.218	77.7362	103.426	86.0271	74.4187	93.6869
SNHG9	108.754	62.4245	92.5392	110.423	93.7124	93.6869
AK2	103.423	90.6923	90.7247	95.015	74.4187	93.3995
AKR1A1	115.151	80.0919	99.7971	77.0392	93.7124	93.3995
CACYBP	87.4297	106.004	65.3218	102.719	101.981	93.3995
TBC1D9B	86.3635	85.981	99.7971	111.707	79.9312	93.3995
SLC4A2	116.218	78.914	128.829	62.9154	79.9312	93.3995
FXYD6	83.1649	75.3806	96.1682	120.695	99.2249	93.3995
ESD	100.224	89.5144	90.7247	87.3111	101.981	93.3995
[truncated: 59,857 more rows]

## Sheet: prot_cod
Gene	Cluster0 (CPM)	Cluster1 (CPM)	Cluster2 (CPM)	Cluster3 (CPM)	Cluster4 (CPM)	All Nodules (CPM)
APOD	7227.24	4798.99	13171.7	4273.95	11386.3	7348.17
TMSB10	6240.47	6276.43	6637.63	6810.59	5498.1	6362.3
MT-CO3	4409.45	7581.32	4603.81	5828.12	9359.96	6049.3
FTH1	6253.52	5604.21	5692.83	5452.66	5905.05	5790.46
MT-CO2	4429.03	7278.17	4653.73	5656.74	7078.21	5711.99
MT-CO1	3718.6	6927.08	3936.35	5058.88	7415	5222.72
S100A6	5927.14	4342.45	4879.3	5066.73	4695.42	5052.89
VIM	6278.55	4125.57	5433.98	3478.55	6547.76	5020.1
FTL	4575.91	3719.37	6201.28	3486.4	4976.07	4421.9
TUBA1A	3107.18	5141.69	2558.91	6929.64	3227.57	4385.6
CLU	4180.98	3713.37	2971.22	4928.06	3443.68	3965.42
CD74	4998.03	3065.12	4187.81	2965.73	3999.38	3838.35
ACTB	3963.39	3594.75	3969.63	3512.57	3673.82	3743.19
EEF1A1	3573.91	2865.01	4675.92	2544.49	4846.97	3477.61
B2M	3825.22	2897.37	3995.52	2866.31	4235.14	3453.6
PSAP	3519.51	3476.12	2917.6	3605.45	2719.58	3349.37
GAPDH	2782.97	4029.71	2375.86	4360.29	2382.79	3334.43
TMSB4X	2916.79	3431.79	3089.55	3198.6	3626.11	3207.07
MT-ND4	2316.24	3718.17	2483.1	2697.55	5405.48	3092.87
ACTG1	2697.02	3181.35	2638.41	3648.62	2778.52	3027.58
NEFH	1700.46	5660.53	1660.33	2637.37	2346.3	2938.86
TUBA1B	2121.5	3504.88	1728.74	4048.94	2337.88	2851.31
GPX3	3143.08	2076.57	4391.19	1870.75	3073.21	2788.06
CST3	3423.77	2247.92	3172.75	2192.58	2452.95	2719.84
MT-ATP6	1982.24	3337.12	2161.39	2240.98	4585.96	2671.24
MT-CYB	1980.06	3293.99	2139.2	2183.42	4479.31	2632.59
NEFL	1381.69	5278.29	1222.14	2397.97	2029.16	2603.6
RPL41	2641.54	2235.93	3622.04	1981.95	3129.34	2600.96
S100A10	2374.99	2975.25	1606.71	3304.56	2071.26	2576.37
HLA-B	2886.32	2147.26	2937.94	2209.58	2806.58	2554.12
UCHL1	1639.54	3521.65	1299.79	3768.98	1841.12	2543.28
TUBB2A	1592.76	2972.86	1131.54	4190.23	1574.49	2436.41
MAP1B	1597.11	3214.9	1170.37	3423.61	2006.71	2376.38
APOE	2522.95	2442.03	1904.39	2132.4	1930.93	2256.04
RPLP1	2243.35	1983.1	2936.09	1694.14	2848.68	2229.69
LGALS1	1923.49	2444.43	1922.88	2465.99	2158.26	2196.6
MT-ND1	1514.42	2631.36	1660.33	1934.86	3903.96	2153.85
RPL13	2176.98	1725.48	3178.3	1495.29	2702.74	2127.5
PTGDS	2131.29	2262.29	1848.92	2099.69	1984.26	2096.17
MT-ND3	1492.66	2316.22	1619.65	1628.73	4215.49	2028.54
FCGBP	2364.11	1898.03	2250.14	1688.91	1813.05	2023.56
CD81	2243.35	1822.54	1922.88	1860.29	1796.21	1957.38
UBC	1997.47	1968.72	1793.45	2042.13	1832.7	1950.94
STMN2	1200.01	2404.89	876.389	3317.64	1481.88	1946.55
PRPH	1260.93	2355.76	926.309	3279.71	1380.84	1939.82
IFITM3	2340.18	1507.4	2631.01	1374.94	1956.19	1926.64
TPT1	1819.05	1659.58	2514.53	1478.29	2433.31	1878.03
RPS12	1906.08	1624.83	2760.44	1414.18	2046	1877.16
MT3	1997.47	2090.94	1392.24	1768.71	1813.05	1854.03
TUBB3	1218.5	2454.01	1020.6	2625.6	1383.65	1821.23
MT2A	2208.53	1482.23	1896.99	1420.73	1712.02	1753.59
NEFM	858.391	3754.11	859.748	1284.67	1307.87	1708.5
THY1	1242.44	2100.53	898.576	2456.84	1307.87	1676.29
S100B	1813.61	1945.96	1157.42	1606.49	1296.64	1641.74
RPL37A	1561.2	1471.45	2176.18	1340.92	2060.03	1639.4
CD59	1759.21	1717.09	1429.22	1487.45	1619.4	1621.25
RPS28	1594.93	1418.73	2187.27	1266.36	2046	1619.2
RPL28	1610.16	1374.39	2179.88	1296.45	1782.18	1590.5
RPS8	1531.83	1350.43	2174.33	1199.64	2102.13	1574.4
SPP1	1542.71	2203.58	1242.47	1021.72	1675.53	1553.9
HSP90AA1	1181.51	1840.51	992.871	1895.61	1543.62	1510.28
PMP22	1791.85	1256.96	1464.35	1274.21	1860.77	1500.61
SERPINA3	1648.24	1684.74	1534.6	961.541	1784.99	1499.73
RPL13A	1490.49	1200.65	2174.33	1105.45	2023.55	1497.39
RPL10	1590.58	1272.54	2052.3	1183.94	1428.55	1478.07
RPL32	1405.63	1254.57	1994.99	1128.99	1843.93	1445.86
RPL17	1544.89	1243.78	1874.81	1177.4	1563.27	1443.22
GSN	1721.13	1141.93	1664.03	1211.41	1535.2	1437.07
CTSB	1292.48	1566.11	1736.14	1253.27	1321.9	1423.9
SPARC	1742.89	1264.15	1416.27	1160.39	1529.59	1421.56
C1QB	1488.31	1284.52	1980.19	1072.74	1319.09	1405.74
CTSD	1312.06	1611.65	1296.09	1416.8	1285.42	1403.4
LGI4	1998.56	1041.28	1357.11	1181.32	1108.6	1387.3
RPS27	1357.76	1061.65	2155.84	903.979	1953.38	1372.37
RPL8	1415.42	1235.39	1743.53	1173.47	1434.16	1371.19
RPS27A	1382.78	1345.63	1752.78	1088.44	1406.1	1368.85
ANXA2	1205.45	1449.88	1096.41	1699.38	1262.96	1364.46
MYL6	1341.44	1400.75	1492.08	1267.66	1271.38	1355.97
RPL34	1254.4	1141.93	1983.89	1033.49	1813.05	1351.28
RPS15	1407.8	1209.03	1701.01	1117.22	1414.52	1341.33
HLA-DRA	1683.05	1062.85	1499.47	1007.33	1577.3	1340.16
MT-ND2	991.12	1562.52	974.381	1109.37	2542.77	1316.44
ITM2B	1443.71	1328.86	1225.83	1274.21	1117.02	1309.12
RPLP2	1344.7	1098.79	1810.09	982.472	1639.05	1307.95
RPL37	1232.64	1123.96	1823.04	935.377	1925.32	1305.31
RPS2	1271.81	1048.47	1998.68	828.103	1529.59	1259.93
RPL36	1235.91	1023.3	1841.53	911.829	1686.76	1254.37
SERF2	1289.22	1203.04	1495.78	1182.63	1063.7	1253.49
IGFBP7	1302.27	904.678	2067.09	749.609	1456.62	1218.64
RPL11	1294.66	1098.79	1593.77	913.137	1262.96	1205.47
RPS26	1291.39	1107.18	1562.34	927.527	1189.99	1197.27
UBB	1009.62	1484.63	950.345	1347.47	1046.86	1195.81
HSPB1	1154.31	1198.25	1103.81	1285.98	1128.25	1183.8
RPS11	1205.45	1018.51	1575.28	805.863	1560.46	1165.94
RPL19	1208.71	1032.89	1523.51	883.048	1338.74	1156.28
PPIA	1003.09	1307.29	996.568	1361.86	993.531	1155.69
PKM	907.348	1502.6	763.604	1505.76	808.296	1153.64
ATP5F1E	1060.75	1230.6	1011.36	1224.49	1226.48	1148.37
HLA-A	1215.24	944.22	1277.6	1067.51	1260.16	1130.51
CALM2	1070.54	1233	959.59	1210.1	1117.02	1128.75
RPL9	1200.01	931.04	1571.58	804.555	1333.13	1118.51
RPS6	1172.81	903.48	1615.96	758.767	1414.52	1109.72
RPL30	1122.76	986.159	1477.29	832.027	1349.97	1104.16
LPL	1255.49	1155.11	721.079	1155.16	1004.76	1097.72
TUBB	962.834	1191.06	795.036	1459.97	856.008	1092.15
SNCG	829.016	1578.09	558.374	1403.72	732.518	1087.76
GNAS	959.57	1096.4	837.561	1439.04	934.593	1078.39
RPL18A	1069.45	898.687	1656.63	769.233	1279.8	1075.46
SELENOW	1032.46	1150.32	941.101	1257.2	822.329	1075.17
MIF	988.944	1218.62	1022.45	1097.6	973.885	1073.12
RPS19	1022.67	899.885	1625.2	795.397	1338.74	1070.19
HSP90AB1	824.664	1349.23	665.612	1367.09	1007.56	1068.14
RPL39	979.153	897.489	1503.17	710.363	1577.3	1044.43
CD63	1117.32	1020.91	1129.69	918.37	1044.05	1043.55
RPL21	1028.11	910.669	1370.05	798.014	1338.74	1034.47
FAU	1085.77	943.022	1283.15	873.89	990.724	1024.81
YWHAH	751.772	1297.7	676.705	1378.86	799.877	1018.66
RPS24	981.329	931.04	1270.21	770.541	1386.45	1009.88
RPL3	1044.43	853.153	1449.55	771.849	1117.02	1008.41
RPS18	942.163	820.801	1623.35	651.493	1451	1008.41
HSPA8	783.322	1271.34	704.439	1285.98	777.424	1001.97
RPL7	1043.34	748.906	1395.94	757.459	1394.87	999.92
RPL35	1010.7	903.48	1253.57	832.027	1161.93	998.749
RPS13	1023.76	871.127	1309.04	815.02	1153.51	998.456
RPL29	996.56	857.946	1477.29	770.541	1086.15	997.578
RPS21	923.667	940.626	1325.68	762.692	1299.45	994.65
C1QA	1037.9	853.153	1432.91	694.664	1125.44	987.623
RPLP0	1005.26	865.136	1290.55	724.753	1254.54	979.424
RPS29	958.482	788.448	1346.01	702.514	1484.68	975.911
RPS3A	1018.32	854.352	1264.66	777.082	1083.34	970.055
RPS23	956.306	875.92	1455.1	709.055	1027.21	967.712
ENO1	1029.2	980.168	830.166	972.007	931.786	962.734
HLA-C	1102.09	883.11	950.345	952.383	738.132	953.072
RPS14	975.889	752.5	1346.01	720.829	1184.38	944.581
YWHAG	671.264	1325.26	547.281	1225.8	740.938	942.824
RPL7A	972.625	835.18	1301.64	737.836	990.724	940.481
RPS17	988.944	669.821	1447.71	663.267	1175.96	930.233
TUBB2B	650.593	1080.82	443.741	1586.87	628.675	930.233
SEMA3B	1417.6	686.597	983.626	664.575	712.872	928.184
A2M	955.218	886.704	1342.32	590.007	1027.21	925.549
UBA52	894.293	859.145	1057.58	889.589	965.465	917.936
SCD	976.977	1019.71	526.942	969.39	889.687	905.345
RPL15	845.335	748.906	1253.57	846.418	1010.37	903.881
C3	967.185	963.392	913.367	766.616	853.202	900.953
CFL1	847.511	950.212	846.806	900.055	957.045	895.683
CALCA	529.83	758.492	428.95	1900.84	597.802	883.678
RPL31	822.488	799.232	1168.52	731.294	1131.05	883.385
SERPING1	1012.88	699.777	1207.35	639.719	982.304	880.457
RPS15A	920.404	758.492	1283.15	622.712	962.658	876.065
RPL35A	850.775	739.32	1103.81	702.514	1128.25	859.375
NDRG2	1151.05	711.76	730.324	832.027	676.387	856.154
CRYAB	1165.19	637.469	791.338	754.842	867.235	854.105
TPI1	700.638	1079.62	671.158	972.007	704.453	849.713
TIMP2	866.006	760.888	684.101	1002.1	886.881	844.149
OAZ1	775.707	850.757	754.36	996.863	740.938	836.537
RPS3	805.081	724.941	1246.17	608.322	1035.63	835.365
ATP1A1	684.319	1199.45	565.77	915.753	580.963	832.437
EIF1	863.83	765.681	857.899	833.336	771.811	822.482
CALM3	566.821	956.203	549.13	1191.79	715.679	814.576
H3F3B	1062.92	595.53	1055.73	617.479	740.938	814.284
PTMA	849.687	629.081	1162.97	499.74	1299.45	813.991
RPS16	849.687	630.279	1233.23	639.719	853.202	810.184
RPSA	848.599	722.544	1085.32	633.178	872.848	809.599
SOD1	633.185	1071.23	523.245	982.472	676.387	805.5
TXNIP	900.821	558.384	1318.28	510.205	959.852	801.986
AHNAK	1029.2	538.014	992.871	624.02	914.946	800.815
RPL12	769.179	627.883	1244.32	608.322	976.691	795.544
ATP6V0C	628.834	886.704	656.367	978.548	785.844	790.859
CAPNS1	661.472	848.36	663.763	979.856	693.226	782.075
RTN4	520.039	1090.41	456.683	1055.73	620.255	779.733
ALDOC	636.449	1126.35	460.381	834.644	614.642	770.363
RTN3	541.798	1152.72	434.496	941.918	600.609	769.778
RPL36A	724.573	668.623	1144.48	587.39	934.593	768.606
HLA-DRB1	970.449	639.865	859.748	584.774	797.07	767.728
PEBP1	749.596	854.352	512.151	917.062	642.708	763.922
RPL4	799.641	721.346	955.892	638.411	746.551	763.629
RACK1	737.628	687.795	1044.64	629.253	867.235	763.336
GLUL	775.707	581.151	1076.07	613.555	943.012	756.894
RPL18	822.488	619.495	1029.85	639.719	724.099	754.552
UQCR11	676.703	832.783	680.403	864.733	594.996	748.989
COX4I1	627.746	937.031	623.086	838.568	606.222	747.525
EEF2	736.54	681.804	911.518	744.377	659.547	744.597
IFITM2	886.677	533.221	1055.73	538.986	752.165	735.227
ATP5F1B	589.668	943.022	606.446	822.87	628.675	734.934
RPL27A	722.397	613.504	1002.12	536.37	1027.21	730.249
YWHAZ	599.459	843.567	471.475	1008.64	592.189	729.664
HINT1	616.866	945.419	538.036	835.952	516.412	723.222
ENO2	549.413	964.591	488.115	945.842	479.926	722.636
ATP5ME	683.231	771.672	628.633	798.014	667.967	720.294
RPS10	801.817	636.27	957.741	531.137	752.165	720.294
RPL6	674.527	692.588	885.633	555.993	993.531	719.123
NDRG1	930.195	593.133	789.489	617.479	541.671	715.024
RPS25	724.573	623.09	1002.12	497.123	917.753	712.974
RPL38	676.703	665.028	881.935	535.062	1030.02	711.51
GNG3	493.928	998.142	401.216	972.007	507.992	710.924
CD99	750.684	721.346	578.712	839.877	479.926	707.996
CALM1	564.645	817.206	532.489	881.74	597.802	695.699
KLC1	508.071	895.092	410.46	930.144	552.897	686.329
RTN1	369.902	938.229	319.863	1160.39	440.634	685.158
RPL26	639.713	669.821	893.029	515.438	878.461	684.279
ADIRF	837.72	546.402	761.755	532.445	799.877	682.23
RPS9	647.329	567.97	963.288	538.986	903.72	680.473
C1R	825.752	552.393	911.518	451.336	740.938	679.887
SPTAN1	546.15	908.273	432.648	854.267	485.539	679.302
TOMM7	756.124	703.372	621.237	607.014	665.16	679.009
RPL5	665.824	563.177	942.95	592.623	743.745	676.374
RPS4X	661.472	594.332	983.626	567.767	656.741	674.617
SPARCL1	600.547	627.883	911.518	504.973	900.914	666.418
RPL22	671.264	606.314	874.54	549.452	679.193	661.148
RPS7	673.44	627.883	928.158	485.349	653.934	658.513
ELOB	646.241	663.83	665.612	656.726	637.095	654.999
PFN1	631.01	661.434	776.547	575.616	687.613	654.999
SPTBN1	724.573	636.27	556.525	643.644	656.741	651.193
DCN	558.117	445.749	1222.14	408.164	951.432	643.287
EEF1G	645.153	620.693	754.36	528.52	738.132	640.066
COX7C	497.192	827.99	495.511	750.918	519.218	636.845
NME2	620.13	654.244	600.899	701.205	555.704	636.845
MIA	785.498	601.521	684.101	451.336	659.547	636.553
RPL23	587.492	591.935	776.547	459.185	1001.95	633.039
NDUFA4	509.159	837.576	497.36	681.582	550.091	630.404
APP	611.426	644.658	514	771.849	491.152	627.476
RPS5	617.954	514.049	937.403	489.274	735.325	626.597
C1S	798.553	497.273	802.432	452.644	583.77	625.719
PRNP	557.029	709.363	364.237	885.664	446.247	625.719
SKP1	574.436	690.191	449.288	758.767	558.51	622.498
PRDX1	595.107	714.156	528.791	626.637	606.222	621.912
RPL27	636.449	521.238	833.863	448.719	853.202	620.156
HLA-DRB5	833.368	503.265	667.46	440.87	645.514	618.984
PRDX5	518.951	712.958	477.022	777.082	527.638	618.399
RHOA	659.296	541.609	656.367	542.911	769.004	615.471
RPL10A	592.931	563.177	841.259	452.644	743.745	609.322
PLP1	807.257	532.023	488.115	538.986	606.222	608.443
RPL23A	554.853	547.6	841.259	453.952	822.329	603.759
IFI27	671.264	516.445	802.432	485.349	527.638	597.61
LDHA	508.071	668.623	495.511	733.911	474.313	592.339
SH3BGRL3	480.873	647.055	543.583	716.904	536.058	589.997
AKAP12	506.984	638.667	403.065	752.226	564.123	583.555
FADS2	661.472	587.142	373.482	641.027	522.025	578.578
HLA-E	632.097	503.265	754.36	457.877	589.383	576.528
CD9	789.85	454.136	491.813	472.267	662.354	576.235
RPL24	560.293	526.031	756.209	433.02	729.712	572.136
DPYSL2	510.247	589.539	441.892	720.829	547.284	569.794
TAGLN2	518.951	498.472	510.302	745.685	510.798	562.474
APLP2	509.159	624.288	486.266	642.336	474.313	559.838
C1QC	564.645	544.005	767.302	423.863	552.897	558.96
EEF1A2	370.99	838.774	319.863	681.582	423.794	552.225
ARHGDIA	496.104	506.859	495.511	639.719	561.317	537.585
MAP1A	366.638	757.293	279.187	693.356	502.379	535.536
GABARAP	562.469	468.515	563.921	512.822	614.642	534.072
RPL14	536.358	482.894	682.252	481.425	536.058	534.072
TXN	391.661	794.439	354.993	593.931	432.214	533.779
COX6C	475.433	601.521	408.612	661.959	435.021	533.193
CSRP1	610.339	506.859	543.583	452.644	552.897	533.193
SRP14	512.423	559.582	510.302	592.623	432.214	533.193
DHCR24	506.984	551.195	329.108	740.452	384.502	529.094
MPZ	646.241	428.973	604.597	426.479	550.091	527.337
RABAC1	504.808	565.574	489.964	600.473	390.115	526.752
AP2M1	465.642	555.988	436.345	692.048	395.728	526.459
CD14	575.524	444.55	717.381	422.555	505.185	524.409
CHCHD2	460.202	596.728	416.007	621.404	429.407	519.432
DYNC1H1	397.101	660.235	306.921	731.294	353.63	517.382
PLTP	535.27	357.078	1094.56	278.651	479.926	517.089
PGAM1	403.629	674.614	379.029	622.712	409.761	515.625
NDRG4	319.857	751.302	207.079	762.692	398.535	514.747
ATP6V0B	435.179	583.547	452.986	609.63	426.601	512.404
S100A11	578.788	420.585	580.561	473.575	513.605	510.062
TUBB4B	396.013	751.302	329.108	586.082	339.597	508.891
RPS20	508.071	427.775	687.799	334.904	752.165	503.62
TIMP1	579.876	395.422	778.396	342.753	479.926	502.742
APOC1	567.909	553.591	367.935	467.034	488.346	501.863
S100A13	462.378	467.317	379.029	661.959	516.412	500.692
UQCRQ	438.443	576.358	471.475	545.527	406.955	498.057
AHNAK2	342.703	730.932	305.072	618.788	373.276	496.593
TSC22D3	530.918	437.361	462.23	506.281	566.93	495.422
FASN	458.026	567.97	308.77	647.568	336.79	491.03
GPI	356.847	597.926	334.655	689.431	381.695	489.273
ANXA6	401.453	591.935	371.633	626.637	350.823	488.394
CALR	515.687	446.947	654.518	376.767	463.086	484.295
STAB1	582.052	339.105	796.885	375.459	328.37	484.002
GSTP1	478.697	466.119	550.978	468.342	460.28	482.831
STMN1	479.785	430.171	336.504	605.705	547.284	480.196
COX6A1	391.661	536.816	375.331	570.383	474.313	473.169
COX5B	399.277	564.375	491.813	484.041	390.115	472.29
ACOT7	354.671	591.935	286.583	647.568	381.695	470.241
EIF4A1	491.752	376.25	587.957	451.336	463.086	466.727
SARAF	397.101	533.221	351.295	596.548	367.663	464.677
ABCA8	594.019	383.44	436.345	389.849	485.539	460.578
PPDPF	533.094	401.413	416.007	481.425	429.407	459.993
ITGB4	626.658	349.889	519.547	353.219	409.761	458.236
TIMP3	503.72	415.792	495.511	434.329	429.407	457.65
PGK1	394.925	511.652	382.727	545.527	412.568	457.065
DDX5	552.677	370.259	449.288	474.884	376.082	455.893
MORF4L1	402.541	517.644	432.648	421.247	555.704	455.601
TLE5	446.058	467.317	465.928	490.582	362.049	455.601
DBI	489.576	469.714	410.46	433.02	418.181	452.087
HTRA1	436.267	600.323	319.863	440.87	367.663	451.794
GUK1	428.651	512.851	360.54	511.514	376.082	451.501
PRDX2	378.606	612.305	334.655	503.664	319.951	450.623
CD163	441.707	333.113	796.885	296.966	550.091	450.33
NGFR	419.948	517.644	388.273	519.363	314.337	450.037
EDF1	416.684	448.145	408.612	559.918	359.243	449.159
IGFBP4	462.378	369.061	780.245	266.877	491.152	449.159
LTBP4	656.032	300.761	541.734	332.288	370.469	448.866
VAT1	384.045	460.128	281.036	650.185	398.535	447.402
NACA	464.554	412.198	501.058	389.849	519.218	446.524
PCSK1N	342.703	502.066	225.568	745.685	277.852	446.524
DKK3	447.146	486.489	321.712	516.747	381.695	445.645
DYNLL2	372.078	555.988	262.547	574.308	376.082	445.353
DYNLL1	446.058	462.524	349.446	476.192	479.926	445.06
NDUFA13	458.026	431.37	443.741	439.562	451.86	444.474
TMA7	452.586	448.145	434.496	444.794	429.407	444.474
SELENOP	493.928	364.268	573.166	311.356	586.576	443.596
CHL1	550.501	316.338	371.633	468.342	519.218	443.303
SERINC1	378.606	475.705	314.317	536.37	522.025	442.424
BSCL2	327.472	569.168	253.302	616.171	350.823	441.839
CKB	447.146	542.807	345.748	430.404	362.049	441.839
SYT11	404.716	524.833	251.453	553.377	370.469	439.496
CD151	441.707	434.964	434.496	473.575	376.082	439.204
CANX	449.322	420.585	430.799	423.863	496.765	438.618
SELENOM	532.006	377.448	436.345	371.534	482.732	438.032
HLA-DPB1	541.798	388.233	473.324	303.507	519.218	437.74
GPX4	489.576	448.145	491.813	359.76	350.823	436.276
HSPG2	629.922	270.804	569.468	327.055	356.436	436.276
CLIC4	601.635	341.501	414.158	323.13	505.185	435.983
CIRBP	543.974	397.819	432.648	409.473	280.658	433.055
HNRNPA2B1	517.863	348.69	508.453	379.384	404.148	432.176
ID3	563.557	298.364	684.101	264.26	373.276	431.005
ATP5MD	397.101	466.119	327.259	529.829	376.082	430.42
COX7A2	410.156	485.291	351.295	493.199	339.597	430.42
MBP	469.993	353.483	467.777	404.24	507.992	430.42
EEF1D	505.896	363.069	595.353	299.582	415.374	429.541
PFDN5	446.058	385.836	547.281	383.308	398.535	428.37
LGALS3	552.677	339.105	504.755	304.815	451.86	426.906
RARRES2	555.941	364.268	438.194	387.233	294.691	425.442
LAPTM5	489.576	342.699	534.338	357.144	398.535	421.636
UQCR10	369.902	498.472	373.482	461.801	362.049	421.636
GTF2I	412.332	442.154	379.029	440.87	415.374	421.05
PLEC	505.896	376.25	428.95	358.452	420.988	420.172
RNASEK	403.629	466.119	323.561	474.884	384.502	420.172
GRINA	393.837	522.437	349.446	400.315	395.728	419.879
UBL5	402.541	426.577	425.252	456.568	348.016	418.415
GNB1	376.43	467.317	336.504	518.055	291.885	415.194
NDFIP1	336.176	466.119	297.676	553.377	359.243	412.851
TAC1	219.765	312.743	194.137	914.445	401.342	412.851
MARCKS	459.114	377.448	412.309	341.445	522.025	411.973
HSP90B1	438.443	355.88	534.338	337.521	443.44	411.387
CD44	428.651	369.061	318.014	489.274	387.309	405.824
MAP1LC3A	325.296	458.929	308.77	570.383	283.465	405.824
QKI	486.313	297.166	410.46	353.219	544.477	404.36
TMEM176B	463.466	405.008	301.374	442.178	322.757	404.067
CLTC	332.912	479.3	306.921	477.5	398.535	403.775
MYL9	464.554	281.589	669.309	260.336	437.827	403.775
MZT2B	411.244	412.198	406.763	401.623	356.436	402.896
VWA1	579.876	300.761	414.158	313.973	356.436	402.603
PCBP2	396.013	416.991	388.273	359.76	488.346	401.432
RNASE1	365.55	268.408	848.655	253.794	437.827	400.847
GAP43	285.042	408.603	238.511	677.657	322.757	399.675
NDUFS5	361.199	480.498	321.712	422.555	373.276	399.09
HLA-DPA1	433.003	336.708	465.928	357.144	432.214	397.626
EIF4G2	378.606	373.854	384.576	459.185	387.309	397.333
COX6B1	404.716	473.308	290.281	431.712	286.272	397.04
CNN3	466.729	319.933	517.698	260.336	505.185	396.747
FOS	458.026	318.734	460.381	358.452	395.728	395.576
ANXA5	435.179	377.448	364.237	368.918	420.988	393.526
GPC1	589.668	282.787	397.518	291.733	353.63	392.941
VMP1	609.251	260.02	441.892	281.267	303.111	392.062
LGALS3BP	425.387	336.708	367.935	409.473	432.214	391.77
CEBPD	491.752	304.355	484.417	295.657	401.342	391.477
PPP2R1A	308.977	456.533	325.41	516.747	283.465	391.477
PRUNE2	264.371	601.521	168.252	508.897	308.724	390.891
RGCC	518.951	366.664	266.245	375.459	297.498	386.499
RHOC	474.345	319.933	438.194	344.062	328.37	386.499
NDUFA1	332.912	470.912	306.921	470.959	258.206	385.621
ATP1B1	278.515	587.142	186.741	485.349	269.432	384.742
FABP3	218.677	509.256	207.079	614.863	294.691	384.45
FABP7	419.948	506.859	164.554	361.068	384.502	383.864
SAT1	409.068	335.51	440.043	370.226	373.276	383.571
SQSTM1	442.795	379.845	391.971	330.979	328.37	382.4
MAPK3	329.648	433.766	251.453	511.514	317.144	382.107
UQCRB	310.065	445.749	354.993	399.007	415.374	381.229
EDIL3	380.782	418.189	184.892	499.74	336.79	380.936
GPM6B	466.729	319.933	332.806	308.74	522.025	380.058
FBXO2	285.042	565.574	225.568	465.726	238.56	379.765
ATP5F1A	356.847	470.912	297.676	402.931	294.691	379.179
S100A4	380.782	348.69	499.209	300.89	415.374	377.422
CDH19	484.137	301.959	319.863	342.753	435.021	376.837
MYL12B	330.736	382.241	334.655	461.801	348.016	375.08
REEP5	260.019	532.023	260.698	434.329	348.016	374.787
GHITM	299.186	479.3	251.453	463.11	319.951	374.494
HNRNPK	410.156	347.492	404.914	366.301	311.531	373.909
COPS9	355.759	405.008	323.561	433.02	289.078	373.03
SLC44A2	486.313	322.329	321.712	379.384	244.173	370.981
MAP4	366.638	372.655	297.676	450.027	317.144	370.688
NPC2	403.629	336.708	393.82	315.281	437.827	369.517
EZR	404.716	375.052	297.676	382	336.79	368.345
ATP5MF	310.065	484.093	281.036	412.089	266.626	366.296
FN1	542.886	243.245	454.835	222.397	373.276	366.296
HAMP	444.971	359.475	310.619	355.836	286.272	366.296
MTCH1	335.088	367.862	330.957	451.336	311.531	366.003
MT1E	520.039	293.571	408.612	240.712	339.597	365.71
PABPC1	308.977	299.562	441.892	265.568	763.391	365.417
BSG	389.485	385.836	377.18	308.74	356.436	365.125
VAT1L	225.205	479.3	153.46	588.699	300.305	365.125
POLR2L	334	328.32	386.424	431.712	350.823	364.539
PRIMA1	498.28	318.734	282.885	350.603	280.658	364.539
LDHB	320.945	445.749	292.13	375.459	364.856	363.661
CADM3	388.397	378.647	293.978	397.699	280.658	361.904
TPPP3	245.876	454.136	221.871	535.062	272.239	360.44
COL1A2	409.068	279.192	403.065	323.13	437.827	360.147
LAMP1	450.41	307.95	380.878	316.589	311.531	360.147
C4orf48	298.098	438.559	264.396	433.02	311.531	358.683
FLNA	427.563	281.589	519.547	255.103	336.79	358.39
GNB2	392.749	346.294	380.878	341.445	300.305	358.39
PEA15	302.449	342.699	281.036	531.137	286.272	358.39
BEX3	300.274	410.999	279.187	460.493	280.658	357.805
RHOQ	297.01	406.206	195.986	497.123	342.403	357.219
YWHAE	329.648	349.889	273.64	435.637	392.922	356.048
DSTN	254.58	409.801	319.863	439.562	356.436	354.877
TMBIM6	386.221	316.338	390.122	298.274	432.214	354.877
MGST3	307.889	466.119	258.849	410.781	238.56	354.584
HMGCS1	236.085	433.766	166.403	554.685	325.564	353.998
KIF1A	266.547	409.801	236.662	494.507	319.951	353.413
TALDO1	386.221	364.268	323.561	347.986	291.885	352.534
FDPS	287.218	388.233	227.417	507.589	291.885	352.241
GDI1	307.889	394.224	305.072	431.712	261.012	351.363
NDUFA11	364.462	341.501	323.561	379.384	322.757	351.363
P4HB	418.86	301.959	399.367	277.342	364.856	349.899
MAP1LC3B	260.019	473.308	238.511	440.87	263.819	349.606
PCP4	213.238	466.119	131.273	608.322	204.881	349.606
PLD3	363.374	359.475	293.978	406.856	241.366	348.435
YWHAQ	312.241	381.043	258.849	453.952	272.239	348.142
SUN2	388.397	316.338	351.295	332.288	345.21	347.849
HSPA5	382.958	337.906	386.424	306.123	308.724	347.557
CYB5R3	320.945	378.647	303.223	384.616	325.564	346.971
PLPP1	434.091	312.743	288.432	323.13	333.984	346.092
DDX17	424.3	274.399	397.518	311.356	297.498	344.921
ITGB8	541.798	216.883	354.993	226.322	376.082	344.921
ATP5MPL	282.866	413.396	271.791	410.781	311.531	344.628
CTNNA1	447.146	303.157	316.165	304.815	305.918	344.628
BEX1	226.293	421.784	162.705	586.082	210.494	342.872
IDS	291.57	365.466	216.324	469.651	339.597	342.579
COX8A	337.264	373.854	297.676	368.918	289.078	341.993
KIF5A	239.348	425.378	177.496	546.836	213.3	341.115
HSPA12A	316.593	436.163	264.396	349.294	272.239	340.236
KIF3C	249.14	439.757	188.59	490.582	249.786	340.236
SLC25A3	289.394	405.008	323.561	337.521	348.016	339.944
DST	352.495	329.519	205.23	389.849	426.601	339.651
SRRM2	477.609	240.848	334.655	321.822	261.012	339.651
ARPC1B	362.287	304.355	388.273	296.966	376.082	339.065
GNAI2	391.661	276.796	401.216	279.959	378.889	338.772
CSDE1	355.759	325.924	262.547	375.459	353.63	337.894
HNRNPA1	357.935	294.769	432.648	259.027	398.535	336.43
SNRPN	246.964	457.731	175.647	453.952	275.045	336.43
CRIP2	315.505	352.285	373.482	332.288	297.498	335.552
PSMD8	301.361	425.378	208.928	416.014	232.946	335.552
CNP	405.804	318.734	319.863	287.808	308.724	334.38
MICALL2	477.609	261.218	271.791	328.363	235.753	333.502
TSPO	362.287	289.976	404.914	279.959	364.856	333.209
RTL8C	280.69	366.664	227.417	452.644	291.885	332.916
AP2S1	289.394	383.44	273.64	387.233	294.691	332.331
NDUFB2	318.769	340.303	297.676	359.76	328.37	330.867
SAMHD1	381.87	313.941	301.374	260.336	435.021	330.867
ATP5IF1	228.469	491.282	205.23	406.856	241.366	330.281
EXTL1	442.795	273.201	288.432	320.514	235.753	327.939
FXYD1	442.795	268.408	336.504	255.103	308.724	327.353
SLC25A6	314.417	313.941	377.18	327.055	317.144	327.353
MAPK8IP1	237.173	355.88	275.489	467.034	269.432	327.06
DCTN2	263.283	361.871	255.151	425.171	305.918	326.768
MLLT11	223.029	365.466	153.46	569.075	238.56	325.889
NEDD8	298.098	336.708	277.338	401.623	277.852	325.304
VGF	214.326	323.527	151.612	586.082	291.885	322.375
S100A8	317.681	291.175	541.734	230.247	252.593	320.326
TECR	260.019	439.757	301.374	278.651	311.531	320.033
NCAM1	351.407	297.166	216.324	389.849	297.498	319.74
RHOB	331.824	267.21	432.648	310.048	249.786	318.569
CD24	223.029	400.215	105.388	519.363	258.206	317.691
NAA38	299.186	355.88	297.676	327.055	280.658	317.105
RPL36AL	330.736	304.355	334.655	296.966	311.531	315.348
IFI27L2	351.407	313.941	308.77	296.966	272.239	315.055
H1FX	335.088	232.46	445.59	282.575	325.564	314.763
ATP6AP1	299.186	323.527	236.662	379.384	308.724	314.177
MXRA7	262.195	298.364	220.022	470.959	291.885	314.177
CLSTN1	311.153	354.682	247.755	349.294	246.979	313.591
LAMTOR4	334	316.338	340.201	311.356	218.914	313.591
TMEM258	360.111	283.985	316.165	295.657	297.498	313.591
PTMS	343.791	237.253	377.18	285.192	373.276	313.006
JUND	319.857	316.338	288.432	346.678	249.786	312.713
PCBP1	310.065	319.933	319.863	266.877	381.695	311.835
OST4	322.032	298.364	336.504	290.425	311.531	310.371
EIF4A2	275.251	317.536	249.604	374.151	333.984	309.785
YWHAB	237.173	366.664	245.906	345.37	378.889	309.199
MT-ND5	215.414	399.017	255.151	252.486	541.671	308.907
RAB6B	243.7	399.017	155.309	439.562	218.914	308.907
ATF4	374.254	261.218	275.489	350.603	210.494	308.614
IFI6	335.088	240.848	388.273	266.877	367.663	308.614
NDUFA3	291.57	361.871	268.094	307.431	291.885	308.614
TSPAN3	280.69	354.682	251.453	334.904	303.111	308.614
INF2	367.726	277.994	286.583	306.123	261.012	308.028
AQP1	294.834	270.804	497.36	234.171	297.498	307.735
DYNLRB1	297.01	333.113	271.791	310.048	319.951	307.15
PARK7	316.593	304.355	282.885	319.205	277.852	304.807
L1CAM	355.759	262.417	157.158	431.712	221.72	304.515
NCDN	308.977	292.373	218.173	419.938	204.881	304.515
WBP2	264.371	342.699	220.022	375.459	289.078	303.929
SLC38A2	288.306	303.157	327.259	306.123	291.885	302.465
SOX10	421.036	219.28	303.223	260.336	263.819	300.708
CFH	312.241	174.944	637.878	139.979	395.728	300.415
GABARAPL2	271.987	328.32	195.986	429.096	190.848	300.415
SPOCK2	188.215	405.008	162.705	444.794	235.753	299.537
NPDC1	306.801	292.373	342.05	313.973	196.461	298.951
S100A9	282.866	227.667	569.468	175.301	342.403	296.902
SOD2	325.296	293.571	310.619	244.637	322.757	296.902
HLA-DQB1	387.309	220.478	356.842	201.466	342.403	295.438
SCRG1	305.713	306.752	207.079	342.753	272.239	295.145
TBCB	257.844	337.906	268.094	324.438	266.626	294.852
OLFM1	244.788	369.061	177.496	392.466	210.494	293.974
TUBA4A	203.446	448.145	179.345	355.836	202.074	293.388
CLIC1	295.922	307.95	305.072	290.425	235.753	292.802
EEF1B2	258.932	260.02	377.18	269.493	367.663	291.631
ARF1	292.658	316.338	275.489	277.342	277.852	290.753
FADS3	379.694	234.857	268.094	302.199	202.074	290.753
TAGLN	268.723	152.178	636.029	181.842	376.082	290.167
BCAP31	269.811	345.096	249.604	306.123	235.753	289.582
RAC1	268.723	288.778	295.827	287.808	336.79	289.289
CHCHD10	278.515	387.034	232.964	269.493	210.494	288.703
DDIT4	367.726	219.28	327.259	273.418	221.72	288.703
ARL6IP5	244.788	329.519	236.662	316.589	322.757	288.41
HSBP1	270.899	256.425	295.827	351.911	255.399	287.825
ATP6V0A1	233.909	339.105	231.115	362.377	230.14	287.532
ADD1	308.977	269.606	288.432	303.507	232.946	286.946
RNF187	261.107	330.717	199.683	320.514	300.305	285.775
DCTN1	218.677	352.285	225.568	346.678	261.012	285.482
SLC15A3	367.726	270.804	273.64	217.164	272.239	285.482
FIS1	269.811	297.166	286.583	293.041	272.239	284.604
ATP5F1D	264.371	337.906	245.906	303.507	227.333	284.311
ATP13A2	206.71	366.664	181.194	409.473	174.008	283.726
EPB41L3	170.808	387.034	168.252	427.788	199.267	283.726
STMN3	211.062	393.026	171.95	354.527	230.14	283.433
NDUFB1	265.459	305.554	268.094	295.657	272.239	283.14
DUSP1	299.186	227.667	342.05	261.644	319.951	282.262
NDUFB7	253.492	310.347	299.525	282.575	261.012	281.969
SFRP5	360.111	237.253	255.151	268.185	249.786	281.383
CAP1	276.339	300.761	255.151	289.116	269.432	281.09
ACADVL	312.241	274.399	306.921	262.952	213.3	280.798
ADH1B	302.449	178.539	434.496	202.774	392.922	280.212
VAMP2	244.788	257.624	221.871	404.24	246.979	280.212
GAS7	362.287	220.478	260.698	239.404	319.951	279.626
LRP1	336.176	212.09	377.18	228.938	252.593	279.626
HCFC1R1	275.251	307.95	232.964	296.966	252.593	279.041
TTYH1	339.44	273.201	192.288	290.425	244.173	279.041
TMED10	357.935	239.65	284.734	213.24	283.465	277.284
CAPZB	283.954	293.571	253.302	296.966	213.3	276.991
TUBB4A	190.391	334.312	162.705	421.247	230.14	276.991
PSMC5	234.997	304.355	257	329.671	227.333	275.82
FCER1G	312.241	237.253	390.122	217.164	221.72	275.527
NFE2L1	233.909	315.14	240.36	345.37	193.654	275.527
PHC2	376.43	209.694	303.223	213.24	261.012	275.527
SNX3	273.075	289.976	284.734	265.568	255.399	275.527
C9orf16	227.381	304.355	214.475	349.294	258.206	274.649
FKBP5	323.12	226.469	286.583	217.164	364.856	274.356
NPTX2	318.769	232.46	197.835	336.212	241.366	274.356
COX7B	207.798	370.259	229.266	277.342	280.658	274.063
TSPAN8	275.251	292.373	157.158	338.829	263.819	273.77
CLIP3	262.195	285.183	197.835	364.993	190.848	273.185
PSMD2	254.58	305.554	218.173	337.521	188.041	272.892
ATP6V0D1	203.446	357.078	173.799	327.055	283.465	272.306
COL18A1	308.977	218.081	354.993	227.63	275.045	272.306
INSIG1	154.489	343.897	122.029	439.562	272.239	271.721
PFKP	186.039	413.396	168.252	304.815	246.979	271.721
SARS	209.974	343.897	223.719	345.37	176.815	271.721
PTGES3	256.756	299.562	236.662	290.425	255.399	271.428
BTF3	289.394	262.417	305.072	231.555	275.045	270.842
MAP2K2	261.107	289.976	214.475	321.822	218.914	269.964
ATP5MG	249.14	295.968	277.338	270.801	244.173	269.378
ANK2	183.863	342.699	123.878	433.02	185.235	269.085
PLEKHB1	324.208	255.227	179.345	283.884	255.399	268.207
PCMT1	205.622	375.052	159.007	311.356	249.786	267.914
COMMD6	256.756	240.848	345.748	252.486	272.239	267.621
H3F3A	310.065	230.064	354.993	176.61	308.724	267.621
ROMO1	304.625	263.615	292.13	240.712	199.267	267.329
MRFAP1	251.316	285.183	218.173	277.342	317.144	267.036
GRN	251.316	226.469	406.763	200.158	322.757	265.865
TMEM176A	294.834	280.39	188.59	281.267	241.366	265.865
JUN	345.967	200.108	255.151	266.877	218.914	264.986
HMGB1	278.515	258.822	275.489	218.473	325.564	264.693
LMNA	344.879	209.694	271.791	209.315	291.885	264.401
ATP5MC3	217.59	342.699	205.23	253.794	311.531	264.108
ATP6V1E1	209.974	349.889	181.194	319.205	204.881	263.522
EGFL8	328.56	212.09	295.827	228.938	241.366	263.522
PINK1	203.446	310.347	218.173	340.137	213.3	263.522
ATOX1	263.283	255.227	227.417	329.671	185.235	262.351
MYH9	262.195	231.262	386.424	196.233	289.078	262.351
CAVIN1	274.163	219.28	318.014	217.164	342.403	262.058
TAPBP	297.01	231.262	282.885	251.178	232.946	261.765
HNRNPC	279.603	255.227	255.151	235.479	294.691	261.473
AATK	362.287	194.116	238.511	266.877	179.621	261.18
LAPTM4A	270.899	208.495	330.957	204.082	373.276	260.887
PFKL	291.57	230.064	330.957	239.404	193.654	260.887
PIN1	231.733	351.087	220.022	266.877	174.008	260.887
CCNI	228.469	263.615	190.439	307.431	339.597	260.301
FLOT1	246.964	273.201	231.115	294.349	232.946	260.009
COX5A	202.358	389.431	194.137	257.719	204.881	259.423
PSMB1	277.427	262.417	223.719	266.877	244.173	259.423
RAN	231.733	303.157	218.173	286.5	232.946	259.423
TSC22D4	260.019	292.373	247.755	228.938	263.819	259.423
FSTL1	279.603	190.522	303.223	264.26	283.465	258.545
SSR4	305.713	212.09	325.41	218.473	230.14	258.545
ANXA1	324.208	202.504	297.676	208.007	266.626	258.252
PSMB4	223.029	281.589	225.568	296.966	261.012	258.252
LAMTOR1	233.909	250.434	271.791	285.192	258.206	257.959
NAP1L1	225.205	237.253	231.115	269.493	406.955	257.959
REEP1	180.599	342.699	155.309	350.603	216.107	257.959
PRKAR1A	225.205	274.399	231.115	285.192	283.465	257.666
SNRNP70	328.56	225.271	279.187	235.479	162.782	257.373
SEPTIN7	241.524	295.968	179.345	278.651	275.045	256.788
ADGRG1	277.427	272.003	223.719	249.87	230.14	256.495
ADCYAP1	125.114	345.096	134.971	431.712	193.654	256.202
CDC37	262.195	258.822	238.511	273.418	224.527	256.202
SNRPD2	253.492	270.804	277.338	249.87	210.494	256.202
GABARAPL1	217.59	375.052	112.784	303.507	185.235	255.324
OGFRL1	294.834	248.038	216.324	247.253	244.173	255.031
ATP5MC2	268.723	252.831	253.302	261.644	210.494	254.738
CCDC92	176.247	311.545	171.95	383.308	174.008	254.738
ATP6V0E1	242.612	275.597	253.302	248.562	235.753	252.981
ZFAND5	265.459	230.064	232.964	266.877	275.045	252.981
PTPRN	180.599	306.752	110.935	414.705	176.815	252.396
CDC42	250.228	272.003	234.813	245.945	246.979	251.81
PHLDA3	275.251	209.694	262.547	266.877	241.366	251.81
TYROBP	298.098	222.874	325.41	196.233	207.687	251.81
DPYSL3	186.039	273.201	116.482	410.781	232.946	251.517
VCP	218.677	283.985	251.453	306.123	143.136	251.517
WSB1	354.671	196.513	210.777	231.555	218.914	251.517
ARL6IP4	290.482	232.46	266.245	234.171	204.881	250.932
KCTD12	314.417	220.478	257	166.144	325.564	250.346
NDUFV1	260.019	295.968	247.755	226.322	174.008	250.346
SORBS1	314.417	202.504	264.396	215.856	246.979	250.053
RPN2	286.13	231.262	247.755	222.397	255.399	249.175
TIMP4	304.625	250.434	151.612	248.562	246.979	248.589
ACLY	208.886	289.976	168.252	349.294	157.169	248.296
RAB7A	253.492	245.641	199.683	273.418	258.206	248.004
BST2	269.811	177.341	421.554	155.678	289.078	247.711
DAG1	317.681	194.116	253.302	202.774	275.045	247.125
DEPP1	300.274	186.927	334.655	173.993	269.432	246.54
PRXL2A	239.348	260.02	166.403	266.877	311.531	246.54
WARS	221.941	277.994	199.683	289.116	216.107	246.54
MAGED1	214.326	274.399	188.59	277.342	280.658	245.954
FCGRT	260.019	192.918	403.065	197.541	196.461	245.661
ATP5PF	234.997	249.236	223.719	256.411	263.819	244.49
TMEM233	166.456	251.632	116.482	434.329	216.107	244.49
TKT	196.918	283.985	221.871	289.116	210.494	244.197
VSIG4	243.7	234.857	325.41	201.466	235.753	244.197
CEND1	168.632	377.448	136.82	302.199	162.782	243.904
MFGE8	271.987	244.443	251.453	238.096	171.202	243.904
SERPINF1	254.58	165.358	475.173	154.37	241.366	243.904
RASSF4	299.186	213.288	232.964	245.945	179.621	243.319
PSMB3	216.502	258.822	232.964	236.788	300.305	242.733
COL6A1	326.384	191.72	277.338	192.308	193.654	241.855
TRIR	276.339	215.685	255.151	242.021	190.848	241.562
FABP5	250.228	268.408	190.439	257.719	188.041	240.391
DNM1	159.928	351.087	144.216	321.822	157.169	240.098
REEP2	193.655	318.734	122.029	303.507	218.914	240.098
NDUFB9	219.765	299.562	192.288	256.411	182.428	239.22
NUPR1	297.01	194.116	247.755	221.089	216.107	238.634
PLBD2	207.798	272.003	157.158	316.589	196.461	238.634
BLOC1S1	275.251	213.288	238.511	227.63	224.527	238.341
EIF3K	228.469	263.615	266.245	221.089	193.654	237.756
PSMB7	212.15	292.373	173.799	269.493	204.881	237.756
ATP6AP2	207.798	244.443	212.626	293.041	213.3	237.17
SLC22A17	274.163	243.245	223.719	205.39	216.107	237.17
WDR83OS	239.348	258.822	238.511	232.863	182.428	236.584
MVD	205.622	279.192	138.669	334.904	148.749	235.999
AHR	315.505	190.522	242.209	163.527	280.658	235.706
KIF21A	163.192	328.32	125.727	303.507	216.107	234.535
MICOS13	221.941	264.813	214.475	244.637	204.881	234.535
ARPC5	208.886	230.064	221.871	244.637	300.305	233.656
DCXR	280.69	203.702	258.849	214.548	185.235	233.656
EIF6	211.062	272.003	179.345	295.657	148.749	233.364
UQCRC1	223.029	256.425	190.439	268.185	196.461	233.364
ERBB3	310.065	207.297	207.079	176.61	255.399	233.071
PPA1	186.039	283.985	244.058	217.164	252.593	233.071
TGFBR2	270.899	166.557	323.561	173.993	280.658	233.071
POMP	208.886	267.21	186.741	273.418	196.461	232.778
UBE2D3	224.117	224.073	225.568	239.404	269.432	232.485
ITGAV	274.163	213.288	194.137	217.164	258.206	232.192
MT1X	236.085	267.21	245.906	173.993	244.173	232.192
STUB1	208.886	262.417	188.59	264.26	218.914	232.192
CYB5R1	155.576	282.787	159.007	340.137	188.041	231.9
CYBA	251.316	203.702	332.806	191	179.621	231.607
FKBP1A	211.062	242.046	232.964	253.794	210.494	231.607
PSMB5	184.951	281.589	192.288	270.801	210.494	231.607
ARL6IP1	214.326	275.597	153.46	255.103	238.56	231.314
NDUFC2	193.655	269.606	218.173	249.87	218.914	231.314
UQCRH	195.831	282.787	221.871	244.637	188.041	231.314
MAP7D1	198.006	279.192	192.288	257.719	202.074	230.728
SNAP25	128.378	399.017	125.727	259.027	199.267	230.728
FAIM2	166.456	319.933	162.705	296.966	143.136	230.143
TRAPPC5	233.909	238.452	203.381	239.404	221.72	230.143
HNRNPU	237.173	195.315	264.396	217.164	261.012	229.264
ITGB1	237.173	207.297	236.662	235.479	230.14	228.679
SERPINB6	271.987	172.548	249.604	242.021	188.041	228.679
TMEM59	218.677	232.46	212.626	235.479	252.593	228.386
ENDOD1	236.085	240.848	160.856	274.726	179.621	228.093
PPIB	265.459	174.944	293.978	184.459	246.979	227.8
ZFP36L1	285.042	190.522	268.094	164.836	238.56	227.508
ATF3	195.831	282.787	131.273	293.041	182.428	227.215
OS9	285.042	165.358	205.23	226.322	255.399	226.922
ECE1	310.065	185.729	214.475	198.849	185.235	226.629
ATP5PO	204.534	264.813	210.777	221.089	227.333	226.336
HDLBP	216.502	233.659	244.058	219.781	218.914	226.043
SCN7A	316.593	208.495	186.741	185.767	179.621	226.043
TLN1	248.052	209.694	251.453	204.082	213.3	225.751
C11orf96	188.215	196.513	318.014	245.945	202.074	225.165
DAD1	226.293	237.253	234.813	206.699	213.3	224.579
HNRNPH1	269.811	189.323	286.583	176.61	199.267	224.579
VPS28	220.853	214.487	232.964	236.788	218.914	224.579
ENTPD6	208.886	272.003	131.273	281.267	171.202	224.287
MDH1	178.423	352.285	125.727	219.781	199.267	223.994
PRDX6	231.733	212.09	249.604	217.164	207.687	223.994
TBCA	179.511	266.011	157.158	259.027	266.626	223.994
ARPC4	224.117	207.297	242.209	234.171	210.494	223.701
LTBP3	332.912	160.565	214.475	181.842	190.848	223.408
SEC61G	224.117	242.046	192.288	218.473	235.753	223.408
DNAJA1	168.632	269.606	179.345	270.801	216.107	222.823
HEBP2	156.664	329.519	118.331	293.041	148.749	222.53
SERINC3	167.544	274.399	183.043	268.185	204.881	222.53
SERPINA5	297.01	221.676	164.554	188.384	190.848	222.237
C12orf57	213.238	202.504	306.921	185.767	238.56	221.944
ACTR1A	190.391	248.038	155.309	293.041	185.235	221.359
CLTA	212.15	230.064	199.683	230.247	238.56	221.359
SYP	183.863	228.866	144.216	323.13	199.267	221.359
AKR1B1	193.655	231.262	223.719	228.938	246.979	221.066
NAPB	151.225	255.227	125.727	359.76	168.395	221.066
ATP6V1G1	180.599	274.399	166.403	235.479	249.786	220.773
BRI3	211.062	219.28	271.791	213.24	188.041	220.773
NDUFB10	202.358	257.624	223.719	219.781	176.815	220.48
TRMT112	241.524	220.478	205.23	206.699	216.107	220.187
RBX1	221.941	237.253	179.345	225.014	224.527	219.895
SMIM29	219.765	242.046	170.101	236.788	199.267	219.016
CYSTM1	202.358	238.452	129.424	270.801	238.56	218.723
HLA-DMA	279.603	164.16	266.245	168.76	224.527	218.723
CARHSP1	212.15	195.315	234.813	245.945	199.267	217.845
MATN2	293.746	188.125	164.554	188.384	235.753	217.845
NAPA	195.831	260.02	195.986	228.938	185.235	217.845
ARL2	246.964	195.315	218.173	213.24	202.074	217.552
NDUFB11	204.534	260.02	197.835	194.925	230.14	217.552
TMOD1	165.368	267.21	112.784	336.212	140.329	217.552
HK1	180.599	257.624	166.403	252.486	216.107	216.967
METRN	294.834	174.944	192.288	200.158	188.041	216.967
GDI2	205.622	213.288	212.626	223.705	244.173	216.674
PGRMC1	232.821	224.073	153.46	247.253	188.041	216.674
STXBP1	162.104	270.804	142.367	294.349	165.588	215.503
SAP18	191.479	244.443	216.324	210.623	216.107	215.21
SREBF1	279.603	171.35	220.022	176.61	227.333	215.21
CSF1R	232.821	203.702	255.151	187.075	193.654	214.917
ZFP36L2	255.668	184.53	245.906	153.062	263.819	214.624
MRPL41	214.326	208.495	203.381	257.719	151.556	214.331
MTRNR2L12	92.4755	197.711	144.216	99.4246	920.56	214.331
PLAC9	211.062	251.632	221.871	171.377	204.881	213.16
SREBF2	206.71	212.09	183.043	259.027	179.621	213.16
CLTB	161.016	275.597	188.59	236.788	185.235	212.867
DAZAP2	240.436	196.513	236.662	172.685	230.14	212.867
NDUFB8	214.326	212.09	199.683	234.171	185.235	212.867
CUTA	206.71	226.469	207.079	214.548	199.267	212.575
TPM3	231.733	182.134	208.928	198.849	261.012	211.696
MAGED2	217.59	190.522	188.59	251.178	193.654	211.403
SNU13	198.006	216.883	194.137	244.637	188.041	211.403
TUFM	215.414	212.09	234.813	206.699	174.008	211.403
EIF5A	209.974	214.487	201.532	209.315	218.914	210.525
PAFAH1B1	168.632	236.055	151.612	286.5	176.815	209.647
MLF2	192.567	228.866	175.647	242.021	188.041	209.354
PITHD1	177.335	277.994	120.18	261.644	154.362	209.354
TCEAL4	200.182	209.694	199.683	236.788	188.041	209.354
ABCA2	278.515	161.764	208.928	194.925	171.202	209.061
CPE	162.104	306.752	114.633	232.863	185.235	208.183
MRPS21	215.414	236.055	162.705	219.781	162.782	207.597
VSIR	244.788	167.755	242.209	192.308	185.235	207.597
SRSF5	229.557	170.151	220.022	230.247	168.395	207.304
NENF	199.094	191.72	210.777	245.945	171.202	206.719
PDIA3	215.414	212.09	231.115	176.61	199.267	206.719
RCAN2	132.73	279.192	118.331	303.507	151.556	206.426
CALCB	131.642	212.09	110.935	388.541	137.523	206.133
NMB	131.642	236.055	157.158	311.356	176.815	206.133
UBA1	250.228	191.72	195.986	213.24	120.683	205.547
KRTCAP2	215.414	165.358	269.942	191	204.881	205.255
NUCB1	218.677	190.522	210.777	197.541	213.3	205.255
PTOV1	221.941	174.944	162.705	253.794	193.654	205.255
NR4A1	263.283	135.402	286.583	160.911	185.235	204.669
CTSA	227.381	232.46	171.95	205.39	126.296	204.376
FUS	232.821	179.737	212.626	202.774	179.621	204.376
HMGN2	245.876	182.134	251.453	163.527	165.588	204.376
TOMM5	135.993	234.857	171.95	286.5	182.428	204.376
TXNL4A	156.664	212.09	151.612	315.281	151.556	204.376
ARPP19	172.984	230.064	147.914	247.253	216.107	204.083
ATP6V0E2	167.544	251.632	144.216	262.952	151.556	204.083
PJA2	163.192	231.262	146.065	262.952	199.267	203.205
PSME1	240.436	167.755	236.662	176.61	196.461	203.205
SEC61A1	198.006	204.901	197.835	217.164	190.848	203.205
SRGN	188.215	190.522	312.468	139.979	241.366	203.205
STOM	224.117	165.358	271.791	158.295	230.14	203.205
GLG1	241.524	174.944	207.079	187.075	196.461	202.912
DDT	172.984	242.046	144.216	243.329	188.041	202.619
LAMB1	264.371	164.16	199.683	181.842	182.428	202.619
VDAC2	156.664	234.857	164.554	272.11	154.362	202.619
ZCCHC24	253.492	170.151	260.698	134.747	204.881	202.619
CDKN2D	135.993	273.201	96.1439	287.808	179.621	201.741
MTURN	209.974	164.16	192.288	226.322	227.333	201.448
ZFP36	232.821	167.755	221.871	196.233	179.621	201.448
MT1M	269.811	147.385	260.698	141.288	182.428	200.57
MXRA8	227.381	161.764	249.604	168.76	216.107	200.57
TMBIM1	232.821	179.737	251.453	179.226	131.909	200.277
ABCA3	191.479	210.892	120.18	290.425	123.49	199.984
FDFT1	194.743	214.487	122.029	239.404	213.3	199.984
LSS	190.391	228.866	146.065	243.329	145.942	199.984
PSMA7	167.544	257.624	160.856	194.925	218.914	199.984
EPDR1	135.993	254.029	97.9928	315.281	143.136	199.691
MID1IP1	203.446	215.685	147.914	200.158	230.14	199.691
RHBDD2	175.16	242.046	159.007	243.329	131.909	199.691
SCARB2	216.502	183.332	212.626	180.534	213.3	199.398
PCBP4	221.941	194.116	177.496	213.24	154.362	199.106
NGRN	168.632	232.46	120.18	270.801	162.782	198.813
ID1	202.358	112.635	441.892	113.815	202.074	198.52
RAB1A	193.655	194.116	201.532	226.322	157.169	198.52
RPS27L	246.964	182.134	181.194	162.219	216.107	198.52
ALDOA	142.521	272.003	140.518	274.726	92.6173	198.227
C1orf122	175.16	209.694	157.158	252.486	176.815	198.227
CD47	191.479	189.323	171.95	223.705	221.72	198.227
COX17	180.599	194.116	153.46	276.034	154.362	198.227
DDX39B	242.612	140.195	232.964	187.075	190.848	198.227
C19orf53	204.534	220.478	159.007	193.616	196.461	197.934
CSNK1A1	190.391	203.702	197.835	194.925	210.494	197.934
FLOT2	195.831	190.522	188.59	222.397	182.428	197.934
MORF4L2	188.215	171.35	205.23	236.788	190.848	197.934
NOP53	195.831	167.755	327.259	129.514	224.527	197.934
SIGIRR	226.293	179.737	201.532	196.233	165.588	197.934
MCAM	168.632	231.262	214.475	218.473	123.49	197.642
NCL	202.358	165.358	205.23	181.842	283.465	197.642
PSMB6	194.743	197.711	192.288	210.623	185.235	197.642
MDH2	180.599	226.469	183.043	227.63	126.296	197.056
PYGB	176.247	255.227	142.367	225.014	137.523	197.056
ARPC3	208.886	186.927	173.799	209.315	196.461	196.763
CYP51A1	168.632	231.262	162.705	206.699	218.914	196.763
ZNHIT1	207.798	188.125	207.079	197.541	168.395	196.47
SH3GLB2	191.479	182.134	181.194	243.329	162.782	196.178
CCDC85B	172.984	246.839	207.079	171.377	171.202	195.885
TRAPPC1	172.984	200.108	184.892	225.014	199.267	195.885
TMEM259	227.381	174.944	214.475	194.925	129.103	195.006
CAVIN3	276.339	133.006	197.835	170.068	176.815	194.714
PSMC3	191.479	201.306	183.043	202.774	188.041	194.714
PTTG1IP	230.645	149.781	225.568	179.226	190.848	194.421
FKBP8	170.808	216.883	184.892	200.158	202.074	194.128
FEZ1	176.247	214.487	109.086	252.486	193.654	193.835
UQCRFS1	150.137	267.21	129.424	217.164	182.428	193.835
HSPA9	170.808	238.452	157.158	197.541	193.654	193.542
PUF60	206.71	185.729	201.532	213.24	120.683	193.25
WDR1	211.062	183.332	179.345	208.007	159.975	193.25
GABBR1	198.006	203.702	195.986	208.007	117.877	192.957
NDUFB4	199.094	208.495	168.252	189.692	182.428	192.664
RAB6A	176.247	227.667	140.518	200.158	216.107	192.664
ACHE	142.521	183.332	116.482	337.521	145.942	192.371
NCS1	166.456	201.306	118.331	293.041	134.716	192.371
UBE2M	184.951	195.315	184.892	223.705	148.749	192.371
WASHC1	236.085	170.151	208.928	187.075	117.877	192.371
HNRNPA3	232.821	159.367	207.079	164.836	196.461	191.786
XRCC6	165.368	212.09	216.324	202.774	148.749	191.493
IGFBP5	225.205	142.592	231.115	141.288	263.819	191.2
NDUFS7	202.358	218.081	173.799	172.685	165.588	191.2
TMEM30A	182.775	224.073	133.122	225.014	151.556	191.2
PLAAT3	251.316	161.764	225.568	142.596	154.362	190.907
NME3	233.909	141.393	218.173	208.007	115.07	190.614
SDCBP	161.016	220.478	188.59	172.685	238.56	190.614
PLXND1	198.006	165.358	268.094	162.219	165.588	189.736
MSMO1	172.984	216.883	112.784	236.788	182.428	189.443
LAMTOR5	191.479	227.667	170.101	180.534	140.329	189.15
USP5	147.961	215.685	149.763	242.021	171.202	188.272
B4GAT1	203.446	203.702	134.971	211.931	140.329	187.979
CSTB	193.655	196.513	179.345	168.76	207.687	187.979
HNRNPDL	207.798	158.169	205.23	188.384	179.621	187.979
MICOS10	174.072	216.883	146.065	219.781	151.556	187.979
RPS4Y1	190.391	165.358	240.36	160.911	213.3	187.979
CTNNB1	186.039	177.341	247.755	151.753	202.074	187.686
MRPL52	166.456	201.306	175.647	217.164	165.588	187.686
B4GALNT4	211.062	170.151	188.59	202.774	131.909	187.394
LHFPL6	192.567	154.574	284.734	112.507	263.819	187.394
LPIN1	162.104	203.702	112.784	255.103	179.621	187.101
TSC22D1	180.599	201.306	220.022	147.829	199.267	186.515
PFN2	156.664	232.46	122.029	214.548	182.428	185.344
BRK1	167.544	183.332	153.46	209.315	230.14	185.051
TPRG1L	130.554	254.029	149.763	201.466	179.621	184.758
RAB11A	152.313	190.522	168.252	245.945	145.942	184.466
SOD3	208.886	182.134	183.043	139.979	224.527	184.466
LRP10	214.326	152.178	218.173	159.603	176.815	183.587
SLC25A1	174.072	191.72	151.612	228.938	140.329	183.587
SLCO2B1	195.831	153.376	231.115	166.144	182.428	183.002
JPT1	121.85	238.452	122.029	257.719	140.329	182.709
MCRIP1	187.127	164.16	197.835	200.158	151.556	182.416
RPS19BP1	181.687	189.323	177.496	193.616	151.556	182.416
SYNGR1	181.687	194.116	149.763	225.014	115.07	182.416
LY6E	199.094	128.213	286.583	142.596	185.235	181.538
OPTN	181.687	184.53	114.633	215.856	202.074	181.538
DDX3X	204.534	154.574	210.777	173.993	154.362	181.245
FCGR3A	182.775	179.737	197.835	139.979	244.173	181.245
HADHA	179.511	185.729	188.59	187.075	151.556	181.245
RAB1B	171.896	182.134	192.288	198.849	148.749	181.245
RUFY3	130.554	244.443	103.54	253.794	123.49	180.952
VAMP1	131.642	311.545	94.295	179.226	137.523	180.952
BLVRB	174.072	197.711	216.324	160.911	145.942	180.659
F13A1	139.257	128.213	416.007	92.8836	238.56	180.366
GNG2	195.831	155.772	136.82	205.39	210.494	180.366
CNBP	191.479	184.53	205.23	153.062	159.975	180.074
IGFBP6	151.225	150.979	282.885	128.205	277.852	180.074
SELENOT	138.169	194.116	146.065	244.637	168.395	180.074
DNAJB2	195.831	196.513	149.763	175.301	154.362	179.781
EGFL7	163.192	185.729	268.094	136.055	168.395	179.781
PSMD4	164.28	197.711	160.856	211.931	137.523	179.781
COTL1	182.775	186.927	181.194	147.829	216.107	179.195
YBX1	170.808	179.737	240.36	112.507	246.979	178.902
YPEL3	203.446	172.548	170.101	187.075	126.296	178.902
ADCY3	211.062	160.565	203.381	143.904	174.008	178.609
AP1S2	171.896	190.522	144.216	189.692	196.461	178.609
KIAA0930	211.062	172.548	153.46	197.541	106.65	178.609
GSTO1	157.752	180.936	227.417	158.295	193.654	178.317
SUMO2	186.039	159.367	175.647	155.678	252.593	178.024
TCF25	176.247	196.513	151.612	184.459	165.588	178.024
CCM2	131.642	226.469	120.18	238.096	137.523	177.438
ENG	165.368	133.006	364.237	103.349	188.041	177.438
KIFAP3	127.29	206.099	112.784	269.493	140.329	177.438
NUCKS1	184.951	165.358	168.252	150.445	255.399	177.145
PMP2	187.127	160.565	146.065	164.836	263.819	177.145
AIF1	194.743	167.755	181.194	142.596	218.914	176.853
C6orf62	181.687	168.953	164.554	170.068	216.107	176.853
FAM50A	176.247	166.557	195.986	170.068	188.041	176.853
PLEKHB2	158.84	180.936	146.065	217.164	174.008	176.853
POLR2E	155.576	237.253	138.669	172.685	157.169	176.853
TACC1	175.16	158.169	227.417	149.137	207.687	176.853
EIF3F	186.039	180.936	192.288	154.37	165.588	176.56
CALD1	193.655	134.204	234.813	133.438	232.946	176.267
SLC25A4	133.818	269.606	112.784	191	131.909	176.267
VKORC1	168.632	158.169	162.705	217.164	171.202	176.267
C1orf198	224.117	123.42	208.928	151.753	174.008	175.681
EID1	179.511	150.979	179.345	175.301	218.914	175.681
ITGB2	181.687	168.953	255.151	143.904	123.49	175.681
VDAC3	126.202	198.909	110.935	272.11	137.523	175.389
PAFAH1B2	177.335	173.746	168.252	168.76	196.461	175.096
TMEM219	179.511	166.557	177.496	196.233	134.716	175.096
IMPDH1	131.642	266.011	125.727	183.151	126.296	174.51
SMDT1	149.049	198.909	155.309	191	176.815	174.51
IDI1	139.257	208.495	120.18	215.856	176.815	174.217
MAPK8IP3	183.863	165.358	133.122	219.781	134.716	174.217
TMEFF2	105.531	198.909	79.5036	317.897	129.103	174.217
H2AFJ	214.326	134.204	232.964	126.897	174.008	173.925
METTL7A	195.831	153.376	175.647	142.596	230.14	173.925
ABHD2	151.225	227.667	122.029	184.459	159.975	173.632
COPE	166.456	197.711	162.705	191	115.07	173.632
FAM20C	188.215	155.772	168.252	185.767	159.975	173.632
JOSD2	174.072	156.971	164.554	196.233	176.815	173.632
PACS2	196.918	161.764	170.101	188.384	115.07	173.632
SSU72	168.632	188.125	186.741	143.904	196.461	173.632
TPP1	195.831	136.6	181.194	175.301	188.041	173.632
ARPC2	143.609	196.513	160.856	181.842	196.461	173.339
PET100	177.335	130.609	199.683	183.151	202.074	173.339
CYP1B1	153.401	136.6	273.64	99.4246	314.337	173.046
NPM1	176.247	141.393	170.101	176.61	235.753	173.046
SYNGR3	130.554	195.315	85.0504	270.801	154.362	173.046
USF2	193.655	150.979	170.101	172.685	174.008	172.753
EMC10	175.16	179.737	151.612	196.233	126.296	172.168
NDUFA2	169.72	191.72	160.856	167.452	159.975	172.168
PPP1CA	192.567	182.134	181.194	142.596	145.942	172.168
CD99L2	165.368	203.702	123.878	185.767	157.169	171.875
ACTN4	179.511	158.169	168.252	162.219	207.687	171.582
ACTR2	163.192	156.971	177.496	164.836	232.946	171.582
TNFRSF1A	211.062	113.834	253.302	125.589	179.621	171.582
MAPRE2	142.521	200.108	118.331	188.384	221.72	171.289
PRX	203.446	125.816	249.604	111.199	204.881	171.289
IFNGR2	191.479	137.799	166.403	166.144	213.3	170.997
STAT2	219.765	130.609	194.137	150.445	148.749	170.997
CAPN2	167.544	186.927	147.914	172.685	171.202	170.704
ATP1A2	187.127	194.116	133.122	155.678	159.975	170.411
ATP2B4	175.16	133.006	116.482	255.103	145.942	170.411
VAPA	152.313	190.522	157.158	162.219	207.687	170.411
KLF2	154.489	129.411	342.05	100.733	193.654	170.118
NDUFS8	157.752	167.755	179.345	177.918	174.008	169.825
PSMB2	169.72	189.323	133.122	180.534	154.362	169.533
RHEB	162.104	194.116	123.878	194.925	145.942	169.533
TYMP	213.238	137.799	260.698	111.199	117.877	169.533
TMX4	138.169	176.143	110.935	242.021	165.588	169.24
FGFBP2	212.15	134.204	251.453	117.74	123.49	168.947
GATM	204.534	137.799	155.309	137.363	238.56	168.947
GPR155	186.039	141.393	155.309	167.452	213.3	168.947
NDUFAB1	153.401	209.694	122.029	192.308	134.716	168.947
NDUFS6	156.664	149.781	164.554	191	204.881	168.947
PSMC1	140.345	182.134	170.101	196.233	151.556	168.947
CCT7	141.433	160.565	188.59	200.158	159.975	168.654
CNTN2	167.544	189.323	123.878	202.774	115.07	168.361
SCAND1	171.896	168.953	175.647	158.295	168.395	168.361
EIF4B	153.401	171.35	207.079	136.055	207.687	168.069
PRMT2	163.192	165.358	147.914	162.219	230.14	168.069
CDS2	141.433	171.35	125.727	247.253	120.683	167.776
FSTL3	236.085	138.997	170.101	126.897	143.136	167.776
SLC3A2	193.655	123.42	199.683	156.986	179.621	167.776
ECHS1	162.104	183.332	160.856	180.534	126.296	167.483
EIF1B	121.85	250.434	105.388	193.616	129.103	167.483
PLEKHA4	206.71	153.376	184.892	96.8082	224.527	167.483
RBM3	184.951	153.376	147.914	188.384	140.329	167.483
NISCH	187.127	158.169	170.101	168.76	129.103	167.19
AKR1C1	143.609	154.574	125.727	253.794	131.909	166.897
FBLN5	193.655	168.953	151.612	141.288	171.202	166.897
ISLR	219.765	149.781	181.194	113.815	159.975	166.605
KLF6	167.544	164.16	160.856	164.836	182.428	166.605
SF1	194.743	137.799	194.137	142.596	171.202	166.605
TMED9	191.479	170.151	183.043	141.288	123.49	166.605
NDUFV2	154.489	202.504	170.101	159.603	120.683	166.312
ZYX	155.576	158.169	208.928	143.904	196.461	166.312
BASP1	80.5081	224.073	81.3525	238.096	224.527	166.019
ITPK1	201.27	135.402	136.82	176.61	168.395	166.019
ST13	153.401	166.557	166.403	173.993	179.621	166.019
VDAC1	132.73	192.918	118.331	198.849	188.041	165.726
ANAPC16	199.094	153.376	181.194	126.897	165.588	165.433
FAM189B	133.818	207.297	125.727	214.548	101.037	165.141
AEBP1	180.599	105.446	319.863	92.8836	182.428	164.848
APBB1	164.28	184.53	134.971	177.918	137.523	164.848
ACO2	162.104	189.323	123.878	177.918	145.942	164.555
EPHX1	154.489	168.953	147.914	176.61	179.621	164.555
POLR2F	188.215	153.376	159.007	162.219	143.136	164.555
PTEN	182.775	155.772	162.705	133.438	207.687	164.555
ATP6V1F	155.576	171.35	133.122	181.842	179.621	164.262
COL8A1	221.941	156.971	142.367	121.664	157.169	164.262
EIF4H	168.632	140.195	179.345	155.678	204.881	164.262
PI4KA	153.401	185.729	166.403	175.301	115.07	164.262
AURKAIP1	176.247	165.358	127.576	188.384	131.909	163.969
JUNB	189.303	130.609	282.885	102.041	129.103	163.969
NCOA7	119.674	180.936	134.971	225.014	151.556	163.969
SCOC	122.938	213.288	79.5036	209.315	182.428	163.677
TIMM13	175.16	148.583	175.647	163.527	151.556	163.677
PDIA6	171.896	155.772	210.777	128.205	162.782	163.384
RNH1	190.391	148.583	170.101	155.678	134.716	163.384
SDHA	138.169	233.659	146.065	162.219	92.6173	163.384
JTB	167.544	152.178	199.683	153.062	143.136	163.091
MAF	216.502	119.825	186.741	103.349	216.107	162.798
SEM1	152.313	160.565	162.705	192.308	131.909	162.798
ATP1B2	193.655	198.909	99.8417	149.137	120.683	162.505
GSTK1	180.599	137.799	146.065	175.301	171.202	162.505
PPP2CA	147.961	185.729	144.216	163.527	168.395	162.213
PRKAR1B	115.322	213.288	79.5036	244.637	112.263	162.213
LSM7	195.831	152.178	136.82	153.062	154.362	161.92
ATP1A3	106.619	226.469	96.1439	214.548	137.523	161.627
CEBPB	176.247	113.834	236.662	136.055	176.815	161.627
GADD45GIP1	155.576	174.944	147.914	185.767	115.07	161.627
ATP5MC1	157.752	180.936	142.367	154.37	168.395	161.334
PTPA	170.808	171.35	144.216	180.534	98.2304	161.334
ATP9A	124.026	189.323	86.8993	234.171	145.942	161.041
ANAPC11	181.687	138.997	181.194	164.836	112.263	160.163
ARF3	145.785	165.358	133.122	196.233	148.749	160.163
MRPL20	146.873	176.143	181.194	158.295	126.296	159.87
PPP1CB	179.511	172.548	142.367	139.979	148.749	159.87
FGF13	116.41	173.746	77.6547	262.952	140.329	159.577
HLA-DMB	191.479	133.006	199.683	130.822	140.329	159.577
ANO5	93.5635	233.659	68.4101	245.945	103.844	158.992
AIF1L	175.16	176.143	151.612	122.973	162.782	158.699
COL4A2	190.391	103.049	268.094	112.507	140.329	158.699
NBL1	147.961	142.592	133.122	225.014	120.683	158.699
SMTN	205.622	123.42	173.799	138.671	140.329	158.699
TPM4	181.687	119.825	195.986	145.212	162.782	158.699
ARL8A	132.73	179.737	118.331	194.925	157.169	158.406
GAA	168.632	142.592	188.59	156.986	126.296	158.406
GFRA1	134.905	189.323	94.295	209.315	134.716	158.406
SULT4A1	106.619	220.478	73.9568	231.555	117.877	158.406
CPLX2	105.531	237.253	83.2014	209.315	112.263	158.113
GAS6	163.192	182.134	192.288	116.431	126.296	158.113
ITGA7	162.104	159.367	129.424	198.849	101.037	158.113
NIBAN2	187.127	118.627	218.173	119.048	168.395	158.113
ASAH1	163.192	150.979	129.424	167.452	182.428	157.821
ELOVL5	132.73	168.953	122.029	202.774	151.556	157.528
SEC11C	145.785	186.927	107.237	173.993	159.975	157.528
AP1S1	115.322	167.755	109.086	245.945	120.683	156.942
NR2F2	186.039	119.825	203.381	112.507	193.654	156.942
EIF4G1	170.808	148.583	168.252	156.986	120.683	156.649
OTUB1	151.225	188.125	127.576	155.678	140.329	156.357
SHISA5	184.951	133.006	168.252	145.212	143.136	156.357
AP2A2	176.247	143.79	142.367	163.527	137.523	156.064
MCL1	178.423	121.023	177.496	151.753	157.169	156.064
EMP3	161.016	152.178	216.324	95.5	188.041	155.771
ETFB	164.28	166.557	168.252	138.671	126.296	155.771
KIF5C	117.498	210.892	72.1079	209.315	137.523	155.771
NCOR2	158.84	150.979	147.914	168.76	143.136	155.771
RPN1	151.225	158.169	151.612	150.445	179.621	155.771
TAX1BP3	169.72	127.014	179.345	136.055	193.654	155.771
CCSER2	101.179	189.323	110.935	209.315	168.395	155.478
DYNC1LI2	142.521	152.178	146.065	177.918	159.975	155.185
HM13	151.225	142.592	199.683	153.062	131.909	155.185
MSN	167.544	115.032	173.799	170.068	157.169	155.185
NDUFA6	130.554	184.53	131.273	177.918	134.716	154.892
MAT2A	171.896	137.799	170.101	155.678	120.683	154.307
ATP6V1B2	108.795	213.288	72.1079	210.623	134.716	154.014
NSF	105.531	189.323	96.1439	208.007	168.395	154.014
USP22	172.984	134.204	146.065	176.61	115.07	154.014
AP1B1	152.313	166.557	133.122	160.911	143.136	153.721
CBR1	158.84	159.367	146.065	159.603	126.296	153.721
FXYD7	71.8045	293.571	94.295	166.144	101.037	153.721
RNASET2	186.039	152.178	147.914	130.822	131.909	153.721
TOMM6	131.642	156.971	140.518	180.534	165.588	153.721
FBXW5	153.401	156.971	138.669	168.76	134.716	153.428
KIF1B	138.169	200.108	81.3525	173.993	148.749	153.428
NDUFA10	154.489	189.323	120.18	158.295	106.65	153.428
PSMA1	141.433	155.772	147.914	166.144	159.975	153.428
TOMM20	149.049	158.169	131.273	155.678	182.428	153.428
CDIPT	143.609	170.151	134.971	168.76	131.909	153.136
HSPA1A	169.72	174.944	123.878	122.973	168.395	153.136
STEAP3	108.795	210.892	133.122	180.534	103.844	153.136
UBXN6	153.401	165.358	149.763	162.219	109.457	153.136
ZEB2	171.896	130.609	144.216	115.123	252.593	153.136
AUP1	177.335	146.186	175.647	136.055	106.65	152.843
CADM4	207.798	119.825	166.403	104.658	168.395	152.55
ITGB1BP1	155.576	156.971	127.576	173.993	126.296	152.55
NUMA1	167.544	127.014	210.777	134.747	123.49	152.55
COL4A1	175.16	95.8599	218.173	128.205	176.815	152.257
EPB41L2	193.655	113.834	144.216	128.205	199.267	152.257
RRAS	180.599	115.032	203.381	136.055	123.49	152.257
APMAP	139.257	186.927	134.971	153.062	126.296	151.964
CDK2AP2	190.391	128.213	131.273	145.212	154.362	151.964
COMT	180.599	123.42	184.892	122.973	157.169	151.964
DCTN3	140.345	173.746	127.576	180.534	106.65	151.964
EIF5	156.664	140.195	120.18	154.37	210.494	151.964
MTPN	121.85	178.539	110.935	172.685	185.235	151.964
SERPINE2	165.368	160.565	114.633	130.822	199.267	151.964
MPRIP	190.391	127.014	166.403	125.589	143.136	151.672
PTPRF	178.423	134.204	118.331	170.068	134.716	151.672
SEC61B	172.984	134.204	166.403	132.13	157.169	151.672
PDLIM4	221.941	115.032	147.914	115.123	137.523	151.379
C4orf3	161.016	159.367	190.439	102.041	151.556	151.086
MVP	175.16	123.42	210.777	125.589	117.877	151.086
RALY	162.104	146.186	157.158	158.295	109.457	151.086
ATXN10	110.971	182.134	107.237	194.925	151.556	150.793
SUMO3	153.401	150.979	129.424	173.993	126.296	150.793
TMEM123	180.599	128.213	177.496	96.8082	202.074	150.793
POLR2I	159.928	124.618	170.101	146.521	162.782	150.208
RNF130	170.808	140.195	157.158	126.897	159.975	150.208
ADI1	168.632	160.565	129.424	146.521	115.07	149.915
ANXA11	161.016	115.032	166.403	158.295	159.975	149.915
B3GAT3	165.368	173.746	127.576	145.212	98.2304	149.915
PLLP	209.974	129.411	142.367	111.199	137.523	149.915
OCIAD1	134.905	165.358	131.273	188.384	95.4239	149.622
CYBRD1	177.335	129.411	160.856	103.349	204.881	149.329
NR2F1	226.293	99.4547	138.669	98.1164	193.654	149.329
SLC1A4	153.401	153.376	103.54	192.308	101.037	148.744
TMEM59L	108.795	225.271	92.446	164.836	123.49	148.744
ALDH2	120.762	190.522	134.971	155.678	126.296	148.451
NFIC	140.345	154.574	142.367	100.733	266.626	148.451
NPTN	116.41	159.367	123.878	194.925	140.329	148.158
PHLDB1	180.599	117.428	194.137	132.13	101.037	148.158
PPP2CB	147.961	156.971	147.914	147.829	129.103	148.158
PHPT1	159.928	140.195	147.914	153.062	123.49	147.865
TAGLN3	103.355	215.685	96.1439	184.459	103.844	147.865
GJA1	174.072	141.393	122.029	122.973	182.428	147.28
PRPF8	152.313	135.402	160.856	147.829	140.329	147.28
LITAF	189.303	119.825	146.065	126.897	145.942	146.987
NDUFB6	151.225	153.376	110.935	153.062	162.782	146.987
APOL2	124.026	174.944	123.878	179.226	103.844	146.694
EIF3B	153.401	141.393	155.309	149.137	123.49	146.694
EPB41L1	112.059	186.927	79.5036	211.931	103.844	146.694
MOAP1	104.443	153.376	97.9928	235.479	123.49	146.694
SFPQ	170.808	94.6617	179.345	136.055	179.621	146.694
SYT4	104.443	162.962	99.8417	228.938	112.263	146.694
DPP7	194.743	117.428	147.914	125.589	131.909	146.401
NAP1L4	127.29	156.971	146.065	162.219	137.523	146.401
EHBP1	165.368	131.807	136.82	139.979	157.169	146.108
GANAB	162.104	128.213	173.799	142.596	112.263	146.108
LAMB2	202.358	98.2564	186.741	102.041	145.942	146.108
EVL	151.225	133.006	146.065	164.836	120.683	145.816
GADD45B	164.28	127.014	205.23	119.048	109.457	145.816
RAP1GDS1	119.674	167.755	101.691	194.925	123.49	145.816
IL6ST	143.609	150.979	160.856	130.822	145.942	145.523
SORT1	156.664	127.014	146.065	153.062	143.136	145.523
SRPX	180.599	112.635	179.345	120.356	134.716	145.523
PLXNB2	169.72	113.834	220.022	115.123	106.65	145.23
SELENOH	138.169	141.393	162.705	155.678	123.49	145.23
ABHD12	140.345	160.565	133.122	160.911	103.844	144.937
COX14	133.818	160.565	142.367	168.76	89.8107	144.937
MS4A6A	166.456	117.428	197.835	98.1164	174.008	144.937
PPP1R12C	167.544	134.204	170.101	133.438	98.2304	144.937
TMOD2	188.215	136.6	125.727	116.431	143.136	144.937
GRB2	146.873	165.358	133.122	130.822	137.523	144.644
NRBP2	165.368	133.006	120.18	162.219	117.877	144.644
RDX	151.225	142.592	147.914	107.274	207.687	144.644
DYNLT3	113.147	200.108	70.259	185.767	117.877	144.352
FKBP1B	110.971	142.592	94.295	243.329	98.2304	144.352
GPX2	78.3322	313.941	73.9568	120.356	75.7778	144.352
SDF4	132.73	142.592	175.647	134.747	151.556	144.352
TOM1L2	152.313	167.755	123.878	143.904	101.037	144.352
CIAO2B	158.84	150.979	134.971	146.521	98.2304	144.059
LENG8	191.479	95.8599	153.46	153.062	101.037	144.059
MX1	132.73	154.574	109.086	172.685	140.329	144.059
CSNK1D	141.433	137.799	160.856	153.062	117.877	143.766
CSNK2B	146.873	142.592	129.424	149.137	148.749	143.766
CTSF	152.313	133.006	127.576	163.527	126.296	143.473
DDX24	125.114	154.574	94.295	177.918	165.588	143.473
HSPD1	146.873	130.609	151.612	141.288	157.169	143.473
PTPRA	166.456	134.204	107.237	164.836	112.263	143.18
QSOX1	145.785	146.186	125.727	155.678	129.103	143.18
AP2B1	130.554	170.151	97.9928	173.993	112.263	142.888
EPN1	162.104	131.807	114.633	163.527	117.877	142.888
LPAR1	180.599	129.411	118.331	120.356	162.782	142.888
REX1BD	143.609	144.988	140.518	154.37	115.07	142.888
SEPTIN2	164.28	127.014	157.158	109.89	171.202	142.595
ANXA7	157.752	136.6	123.878	142.596	143.136	142.302
RNF181	129.466	153.376	149.763	158.295	103.844	142.302
MAPRE3	99.0032	198.909	85.0504	187.075	109.457	142.009
NDUFB3	105.531	210.892	99.8417	166.144	87.0041	142.009
NFKBIA	184.951	93.4634	164.554	126.897	143.136	142.009
NNMT	163.192	94.6617	262.547	74.5685	159.975	142.009
SUB1	124.026	153.376	138.669	138.671	174.008	142.009
NACAD	105.531	174.944	79.5036	205.39	115.07	141.716
ISCU	129.466	168.953	127.576	130.822	151.556	141.424
MDK	205.622	97.0582	173.799	96.8082	126.296	141.424
HIGD1A	109.883	178.539	88.7482	183.151	123.49	141.131
KCNAB2	96.8273	188.125	97.9928	193.616	98.2304	141.131
NDUFS2	143.609	167.755	116.482	132.13	129.103	141.131
OGA	161.016	153.376	142.367	124.281	95.4239	141.131
RAB5B	134.905	121.023	140.518	185.767	109.457	141.131
CCNL2	154.489	105.446	171.95	166.144	87.0041	140.838
CTTN	183.863	144.988	125.727	124.281	78.5844	140.838
MBNL2	169.72	121.023	131.273	138.671	131.909	140.838
RBM39	162.104	100.653	159.007	141.288	151.556	140.838
S100A1	166.456	144.988	125.727	125.589	120.683	140.838
RNPS1	121.85	133.006	123.878	181.842	143.136	140.545
SURF4	157.752	119.825	155.309	137.363	129.103	140.545
ASPH	140.345	155.772	133.122	138.671	117.877	140.252
NOP10	138.169	150.979	157.158	119.048	140.329	140.252
SET	138.169	125.816	173.799	113.815	185.235	140.252
SPCS2	181.687	122.221	129.424	132.13	109.457	140.252
ATP5PD	119.674	153.376	131.273	146.521	159.975	139.96
CCND3	144.697	133.006	144.216	146.521	123.49	139.96
DBNL	145.785	149.781	127.576	137.363	126.296	139.96
DDB1	139.257	160.565	134.971	141.288	98.2304	139.96
MYO1C	176.247	111.437	184.892	104.658	120.683	139.96
CPLX1	118.586	231.262	79.5036	134.747	81.3909	139.667
ERP29	135.993	158.169	109.086	162.219	103.844	139.667
LIMS2	174.072	92.2652	173.799	128.205	134.716	139.667
RUNDC3A	96.8273	182.134	72.1079	198.849	126.296	139.667
GPAA1	156.664	113.834	149.763	134.747	145.942	139.081
LARP1	115.322	152.178	110.935	166.144	154.362	139.081
PKD1	165.368	124.618	110.935	151.753	120.683	139.081
TMED2	132.73	127.014	149.763	125.589	196.461	139.081
QDPR	106.619	134.204	92.446	228.938	109.457	138.788
ACTR10	116.41	166.557	81.3525	193.616	98.2304	138.496
WFS1	138.169	168.953	97.9928	151.753	101.037	138.496
HUWE1	129.466	135.402	134.971	150.445	145.942	138.203
LSM4	127.29	162.962	118.331	147.829	117.877	138.203
UBE2L3	132.73	172.548	131.273	126.897	106.65	138.203
VGLL4	182.775	116.23	109.086	147.829	98.2304	138.203
ILK	143.609	131.807	171.95	116.431	131.909	137.91
SON	131.642	119.825	149.763	130.822	193.654	137.91
EIF3G	159.928	125.816	177.496	103.349	120.683	137.617
HSD17B12	119.674	148.583	107.237	154.37	168.395	137.617
JAK1	100.091	174.944	120.18	163.527	117.877	137.617
NDUFAF3	122.938	141.393	136.82	158.295	123.49	137.617
RETREG2	117.498	160.565	114.633	171.377	98.2304	137.617
HSPE1	140.345	161.764	136.82	115.123	120.683	137.324
TSPAN7	93.5635	162.962	99.8417	197.541	117.877	137.324
COL6A2	141.433	97.0582	244.058	92.8836	151.556	137.032
LRPAP1	171.896	119.825	149.763	109.89	126.296	137.032
PICALM	151.225	129.411	125.727	145.212	117.877	137.032
PRKCSH	150.137	119.825	162.705	132.13	115.07	137.032
EIF3I	138.169	144.988	118.331	126.897	162.782	136.739
ERBB2	180.599	99.4547	153.46	109.89	143.136	136.739
PDXK	114.234	147.385	166.403	129.514	140.329	136.739
RNF11	122.938	158.169	97.9928	151.753	148.749	136.739
SF3B5	130.554	121.023	177.496	133.438	134.716	136.739
C20orf27	119.674	116.23	122.029	211.931	84.1975	136.153
CHPF	151.225	153.376	96.1439	150.445	87.0041	136.153
MAPK8IP2	104.443	192.918	85.0504	166.144	98.2304	136.153
NDUFC1	139.257	130.609	140.518	125.589	157.169	136.153
SPOCK1	94.6514	179.737	72.1079	205.39	89.8107	136.153
COL5A3	204.534	98.2564	151.612	107.274	84.1975	135.86
GBA	138.169	134.204	155.309	138.671	98.2304	135.86
HABP4	112.059	162.962	94.295	171.377	120.683	135.86
OAZ2	97.9153	136.6	127.576	197.541	112.263	135.86
TOLLIP	113.147	153.376	99.8417	183.151	106.65	135.86
TPGS2	96.8273	156.971	90.5971	181.842	157.169	135.86
ATP5PB	104.443	155.772	134.971	147.829	143.136	135.568
MAN2A2	169.72	122.221	123.878	113.815	143.136	135.568
NCKAP1	118.586	165.358	107.237	153.062	115.07	135.568
NUDT3	134.905	136.6	125.727	133.438	154.362	135.568
OAT	124.026	184.53	79.5036	139.979	126.296	135.568
PDK4	163.192	107.842	144.216	113.815	162.782	135.568
EMC4	113.147	149.781	136.82	143.904	137.523	135.275
ALCAM	109.883	150.979	83.2014	175.301	154.362	134.982
CCT5	115.322	137.799	160.856	141.288	126.296	134.982
IFI16	157.752	101.851	155.309	104.658	188.041	134.982
RHBDF1	213.238	99.4547	120.18	103.349	106.65	134.982
BTG1	157.752	118.627	142.367	95.5	185.235	134.689
MRPL51	126.202	127.014	134.971	163.527	112.263	134.689
NDN	108.795	153.376	92.446	173.993	137.523	134.689
PSMD3	128.378	143.79	114.633	159.603	106.65	134.689
BAD	137.081	136.6	125.727	151.753	98.2304	134.396
C11orf58	149.049	117.428	114.633	130.822	174.008	134.396
CTNNAL1	172.984	115.032	138.669	95.5	157.169	134.396
CYC1	125.114	162.962	109.086	130.822	137.523	134.396
PON2	184.951	119.825	114.633	113.815	112.263	134.396
SRSF3	143.609	143.79	155.309	102.041	126.296	134.396
TGOLN2	151.225	105.446	146.065	126.897	157.169	134.396
TM9SF2	165.368	106.644	120.18	136.055	137.523	134.396
WDR13	140.345	131.807	177.496	116.431	98.2304	134.396
PSMF1	152.313	130.609	116.482	128.205	134.716	134.104
RNF7	121.85	146.186	125.727	168.76	75.7778	134.104
RTF2	144.697	136.6	136.82	120.356	126.296	134.104
PSMD13	132.73	131.807	123.878	154.37	112.263	133.811
RAB5C	131.642	112.635	175.647	139.979	112.263	133.811
H2AFZ	132.73	133.006	140.518	129.514	134.716	133.518
KCNMB4	167.544	113.834	142.367	108.582	131.909	133.518
YIPF3	129.466	136.6	134.971	159.603	78.5844	133.518
ADAR	141.433	107.842	166.403	142.596	101.037	133.225
CTBP1	143.609	115.032	105.388	167.452	117.877	133.225
CYB5R2	215.414	103.049	155.309	81.1096	70.1646	133.225
PSMA6	115.322	128.213	127.576	172.685	115.07	133.225
SLC44A1	174.072	94.6617	155.309	109.89	134.716	133.225
SLC66A2	116.41	161.764	120.18	143.904	106.65	133.225
ABHD17A	137.081	133.006	136.82	121.664	140.329	132.932
EDNRB	142.521	135.402	127.576	126.897	123.49	132.932
HNRNPA0	146.873	119.825	155.309	102.041	159.975	132.932
LANCL1	100.091	178.539	86.8993	159.603	123.49	132.932
SNCA	128.378	127.014	105.388	155.678	151.556	132.932
SSR1	134.905	130.609	151.612	111.199	151.556	132.932
ATL1	93.5635	191.72	68.4101	162.219	129.103	132.64
HPCAL1	117.498	137.799	81.3525	194.925	103.844	132.64
KDELR2	157.752	105.446	175.647	99.4246	137.523	132.64
PACSIN2	138.169	144.988	109.086	150.445	87.0041	132.64
PRSS23	158.84	99.4547	144.216	104.658	185.235	132.64
SF3B1	157.752	97.0582	159.007	107.274	165.588	132.64
CAPN1	128.378	128.213	142.367	143.904	112.263	132.347
NHP2	126.202	131.807	131.273	154.37	103.844	132.347
PCBP3	96.8273	171.35	75.8058	185.767	103.844	132.347
APRT	129.466	117.428	151.612	126.897	151.556	131.761
BAG6	138.169	124.618	138.669	134.747	115.07	131.761
PDAP1	128.378	130.609	142.367	125.589	140.329	131.761
PFKM	96.8273	164.16	114.633	153.062	123.49	131.468
RAB2A	126.202	125.816	123.878	142.596	145.942	131.468
SRSF2	145.785	116.23	140.518	128.205	123.49	131.468
MGAT1	137.081	86.2739	179.345	136.055	137.523	131.175
NELFE	126.202	125.816	153.46	116.431	154.362	131.175
CDK2AP1	129.466	122.221	134.971	134.747	140.329	130.883
GALNT2	174.072	97.0582	171.95	109.89	81.3909	130.883
NME1	135.993	177.341	79.5036	126.897	95.4239	130.883
TPD52L2	125.114	143.79	116.482	145.212	106.65	130.883
WSB2	109.883	122.221	105.388	196.233	103.844	130.883
YPEL5	119.674	152.178	105.388	141.288	126.296	130.883
BIN1	167.544	113.834	107.237	137.363	95.4239	130.59
BRD2	145.785	128.213	133.122	130.822	92.6173	130.59
PRAF2	112.059	150.979	125.727	146.521	103.844	130.59
CAPZA2	112.059	136.6	136.82	133.438	145.942	130.297
TPD52	84.8599	159.367	83.2014	188.384	126.296	130.297
CCT4	105.531	134.204	122.029	155.678	140.329	130.004
CD164	132.73	130.609	123.878	113.815	165.588	130.004
FXYD5	120.762	110.239	190.439	119.048	131.909	130.004
KRT10	138.169	115.032	131.273	138.671	123.49	130.004
PRMT1	146.873	103.049	157.158	143.904	78.5844	130.004
SYNGR2	137.081	106.644	166.403	117.74	137.523	130.004
VPS35	100.091	165.358	83.2014	145.212	162.782	130.004
MYL12A	127.29	111.437	190.439	108.582	131.909	129.711
WIPF1	167.544	85.0757	136.82	113.815	159.975	129.711
BAG1	101.179	131.807	99.8417	179.226	134.716	129.419
BNIP3	91.3876	198.909	64.7122	147.829	123.49	129.419
IRS2	140.345	123.42	112.784	112.507	176.815	129.419
STARD7	126.202	133.006	122.029	132.13	134.716	129.419
YIF1B	117.498	140.195	120.18	153.062	98.2304	129.419
ACSS2	121.85	148.583	92.446	151.753	109.457	129.126
FADS1	145.785	118.627	109.086	138.671	120.683	129.126
HNRNPD	137.081	113.834	127.576	132.13	140.329	129.126
SCP2	129.466	134.204	142.367	115.123	126.296	129.126
TTL	103.355	166.557	75.8058	180.534	78.5844	129.126
UBALD2	167.544	91.0669	147.914	107.274	137.523	129.126
COPS6	114.234	134.204	133.122	138.671	126.296	128.833
DDX6	122.938	124.618	131.273	137.363	131.909	128.833
KTN1	102.267	124.618	116.482	134.747	213.3	128.833
SOX2	190.391	98.2564	90.5971	94.1918	174.008	128.833
GPM6A	147.961	83.8774	125.727	120.356	204.881	128.54
NTRK1	87.0358	104.248	88.7482	257.719	75.7778	128.54
SERBP1	124.026	106.644	164.554	94.1918	210.494	128.54
CTDSP1	165.368	83.8774	195.986	75.8767	145.942	128.247
DUSP3	110.971	142.592	79.5036	179.226	101.037	127.955
PLEKHM2	144.697	119.825	142.367	126.897	84.1975	127.955
SSR2	142.521	135.402	125.727	99.4246	137.523	127.955
TNS1	119.674	143.79	133.122	104.658	154.362	127.955
HP1BP3	152.313	113.834	122.029	111.199	140.329	127.662
WDR6	139.257	106.644	160.856	116.431	120.683	127.662
AP3D1	96.8273	140.195	123.878	168.76	92.6173	127.369
ARHGEF17	121.85	136.6	146.065	130.822	84.1975	127.369
DNER	62.013	227.667	70.259	154.37	87.0041	127.076
GNG5	151.225	101.851	164.554	95.5	134.716	127.076
ESYT1	124.026	155.772	81.3525	147.829	89.8107	126.783
HLA-DQA1	157.752	116.23	136.82	85.0342	143.136	126.491
PAQR8	143.609	134.204	88.7482	125.589	123.49	126.491
TRIM28	177.335	92.2652	129.424	100.733	126.296	126.491
ARRB1	107.707	142.592	85.0504	172.685	98.2304	126.198
C1orf43	134.905	131.807	114.633	115.123	131.909	126.198
CHP1	103.355	137.799	94.295	155.678	143.136	126.198
EHD2	125.114	98.2564	212.626	112.507	92.6173	126.198
EPAS1	119.674	100.653	232.964	79.8014	140.329	126.198
SH3BGRL	135.993	137.799	122.029	98.1164	140.329	126.198
TMEM230	119.674	140.195	103.54	121.664	154.362	126.198
CARD19	132.73	130.609	77.6547	159.603	98.2304	125.905
POLD4	131.642	112.635	138.669	119.048	137.523	125.905
ADIPOR2	138.169	101.851	112.784	145.212	126.296	125.612
EIF3H	110.971	105.446	157.158	122.973	168.395	125.612
MFSD10	158.84	100.653	129.424	125.589	92.6173	125.612
SPCS3	124.026	134.204	116.482	142.596	87.0041	125.612
TM9SF3	129.466	119.825	122.029	125.589	134.716	125.612
TXNL1	99.0032	154.574	79.5036	170.068	101.037	125.612
WASF2	165.368	100.653	144.216	86.3425	137.523	125.612
CHD4	142.521	111.437	134.971	103.349	145.942	125.319
HNRNPM	129.466	88.6704	134.971	133.438	168.395	125.319
PPFIBP1	157.752	101.851	114.633	120.356	123.49	125.319
PTP4A2	106.619	121.023	144.216	117.74	171.202	125.319
SNX17	155.576	121.023	122.029	105.966	103.844	125.319
ARL8B	101.179	150.979	92.446	149.137	123.49	125.027
CERS2	146.873	118.627	138.669	104.658	106.65	125.027
KLF9	141.433	101.851	146.065	103.349	151.556	125.027
MYDGF	146.873	110.239	142.367	115.123	98.2304	125.027
PCBD1	99.0032	112.635	125.727	177.918	106.65	125.027
CALCOCO2	138.169	92.2652	123.878	125.589	165.588	124.734
CAPN5	107.707	115.032	112.784	179.226	92.6173	124.734
CDK5RAP3	161.016	111.437	151.612	119.048	33.679	124.734
MAP7D2	77.2443	206.099	81.3525	130.822	109.457	124.734
PDZD2	145.785	112.635	101.691	124.281	134.716	124.734
PHB	112.059	140.195	144.216	116.431	109.457	124.734
SEPTIN9	145.785	101.851	133.122	111.199	140.329	124.734
APOC2	138.169	140.195	81.3525	138.671	87.0041	124.441
ARHGEF10	167.544	101.851	99.8417	121.664	109.457	124.441
GIT1	121.85	128.213	127.576	132.13	101.037	124.441
LMAN2	128.378	97.0582	164.554	126.897	112.263	124.441
CALY	80.5081	165.358	83.2014	173.993	95.4239	124.148
H2AFV	140.345	119.825	112.784	86.3425	190.848	124.148
PSME2	167.544	95.8599	166.403	95.5	75.7778	124.148
ENTPD2	157.752	107.842	114.633	107.274	123.49	123.855
LAMTOR2	133.818	141.393	133.122	111.199	70.1646	123.855
PHB2	131.642	118.627	133.122	111.199	129.103	123.855
SSR3	137.081	106.644	131.273	105.966	157.169	123.855
UBE2D2	113.147	134.204	103.54	132.13	140.329	123.855
LAMA4	151.225	94.6617	107.237	130.822	129.103	123.563
NINJ1	128.378	112.635	114.633	128.205	140.329	123.563
PSMA4	99.0032	135.402	157.158	125.589	103.844	123.563
SLIRP	143.609	135.402	85.0504	122.973	103.844	123.563
SORBS3	169.72	69.4984	168.252	102.041	109.457	123.563
UPK3BL1	159.928	103.049	123.878	113.815	98.2304	123.563
XRCC5	143.609	113.834	122.029	96.8082	154.362	123.563
FUNDC2	133.818	149.781	112.784	94.1918	112.263	123.27
IFI30	146.873	104.248	184.892	85.0342	95.4239	123.27
LYNX1	90.2996	136.6	81.3525	179.226	120.683	123.27
PLOD1	137.081	97.0582	164.554	98.1164	140.329	123.27
RNF213	141.433	107.842	168.252	102.041	89.8107	123.27
SELENOF	114.234	87.4722	147.914	121.664	196.461	123.27
SYNM	135.993	119.825	96.1439	134.747	115.07	123.27
CTDSP2	144.697	105.446	170.101	91.5753	103.844	122.977
EWSR1	134.905	106.644	133.122	103.349	154.362	122.684
SF3B2	132.73	100.653	134.971	138.671	95.4239	122.684
UQCRC2	109.883	148.583	86.8993	138.671	115.07	122.684
ARGLU1	162.104	95.8599	122.029	112.507	103.844	122.391
ILF3	139.257	97.0582	127.576	128.205	117.877	122.391
PPT1	122.938	124.618	114.633	107.274	159.975	122.391
STX12	107.707	142.592	92.446	145.212	109.457	122.391
ATP1B3	117.498	110.239	173.799	103.349	123.49	122.099
CTSZ	119.674	117.428	146.065	133.438	78.5844	122.099
DGKH	104.443	101.851	49.9209	218.473	117.877	122.099
GPS1	116.41	140.195	116.482	122.973	101.037	122.099
NID1	149.049	89.8687	134.971	90.2671	176.815	122.099
PAIP2	125.114	134.204	105.388	129.514	95.4239	122.099
SCD5	119.674	159.367	68.4101	141.288	81.3909	122.099
GRAMD1B	137.081	154.574	70.259	121.664	84.1975	121.806
ICMT	88.1237	135.402	85.0504	176.61	115.07	121.806
SRP9	126.202	116.23	109.086	116.431	154.362	121.806
GLS	88.1237	158.169	81.3525	159.603	101.037	121.513
PCNP	128.378	123.42	103.54	111.199	148.749	121.513
PNKD	142.521	124.618	120.18	117.74	70.1646	121.513
STK25	121.85	117.428	123.878	143.904	78.5844	121.513
CAST	108.795	117.428	112.784	121.664	174.008	121.22
DHRS7	129.466	112.635	136.82	105.966	129.103	121.22
EMP1	137.081	89.8687	181.194	91.5753	126.296	121.22
NUDC	141.433	111.437	112.784	122.973	101.037	121.22
FBLN2	162.104	81.4809	162.705	85.0342	120.683	120.927
ISG15	120.762	92.2652	218.173	74.5685	140.329	120.927
ITFG1	110.971	134.204	77.6547	155.678	106.65	120.927
PAXX	135.993	97.0582	144.216	119.048	106.65	120.927
PTBP1	161.016	95.8599	159.007	96.8082	70.1646	120.927
SELENOK	120.762	127.014	112.784	115.123	131.909	120.927
SH3BP2	145.785	83.8774	170.101	108.582	95.4239	120.927
SSBP4	138.169	83.8774	186.741	104.658	98.2304	120.927
STIP1	110.971	116.23	99.8417	145.212	137.523	120.927
USP11	126.202	116.23	105.388	142.596	95.4239	120.927
ALKBH7	120.762	128.213	109.086	120.356	120.683	120.635
CUEDC2	121.85	125.816	109.086	120.356	123.49	120.635
MZT2A	112.059	141.393	85.0504	138.671	109.457	120.635
BCAM	99.0032	131.807	97.9928	142.596	134.716	120.342
GASK1B	142.521	93.4634	140.518	109.89	117.877	120.342
IRF2BP2	151.225	98.2564	125.727	111.199	103.844	120.342
ANK3	130.554	118.627	90.5971	132.13	115.07	120.049
ARHGDIG	87.0358	129.411	79.5036	196.233	81.3909	120.049
CCT3	115.322	110.239	105.388	149.137	115.07	120.049
H1F0	155.576	98.2564	114.633	103.349	123.49	120.049
TMEM256	135.993	119.825	120.18	121.664	75.7778	120.049
ADD3	129.466	100.653	112.784	100.733	190.848	119.756
PDIA4	149.049	73.0932	192.288	75.8767	137.523	119.756
SLC2A3	99.0032	129.411	94.295	155.678	112.263	119.756
ALOX5AP	116.41	112.635	151.612	96.8082	143.136	119.463
NAGK	115.322	110.239	138.669	121.664	117.877	119.463
SHISA4	112.059	128.213	79.5036	141.288	131.909	119.463
TPM2	134.905	83.8774	203.381	87.6507	103.844	119.463
ARHGDIB	114.234	122.221	155.309	81.1096	151.556	119.171
G3BP2	89.2117	128.213	94.295	162.219	120.683	119.171
RRBP1	140.345	97.0582	146.065	100.733	115.07	119.171
RTRAF	122.938	106.644	112.784	124.281	137.523	119.171
SLC38A10	134.905	106.644	153.46	96.8082	103.844	119.171
AZIN1	106.619	136.6	88.7482	124.281	143.136	118.878
CPNE6	79.4202	213.288	59.1655	117.74	92.6173	118.878
DDR1	164.28	86.2739	123.878	112.507	84.1975	118.878
GNAO1	60.9251	141.393	66.5612	211.931	95.4239	118.878
SPCS1	139.257	130.609	109.086	91.5753	112.263	118.878
SRM	108.795	104.248	155.309	130.822	98.2304	118.878
MGP	100.091	103.049	210.777	85.0342	134.716	118.585
NUDT4	97.9153	118.627	103.54	154.37	117.877	118.585
PNPLA6	133.818	106.644	88.7482	150.445	84.1975	118.585
CLPTM1	120.762	116.23	118.331	129.514	92.6173	118.292
METTL26	133.818	97.0582	146.065	108.582	106.65	118.292
PABPN1	145.785	94.6617	114.633	124.281	95.4239	118.292
SGK1	110.971	117.428	131.273	122.973	109.457	118.292
TAF10	118.586	99.4547	146.065	119.048	117.877	118.292
TMEM248	108.795	111.437	118.331	137.363	117.877	118.292
CAMLG	88.1237	147.385	81.3525	149.137	115.07	117.999
IDH3B	120.762	131.807	99.8417	125.589	89.8107	117.999
CMPK1	96.8273	137.799	97.9928	133.438	120.683	117.707
GRHPR	131.642	143.79	97.9928	94.1918	101.037	117.707
HRAS	78.3322	154.574	88.7482	164.836	75.7778	117.707
CDKN1A	109.883	111.437	164.554	108.582	98.2304	117.414
COX7A1	105.531	99.4547	157.158	103.349	159.975	117.414
MBNL1	121.85	112.635	88.7482	120.356	154.362	117.414
MLEC	143.609	110.239	101.691	100.733	126.296	117.414
NAT8L	99.0032	180.936	64.7122	113.815	103.844	117.414
PSMC4	117.498	122.221	85.0504	133.438	120.683	117.414
SNX10	76.1563	147.385	72.1079	173.993	101.037	117.414
TMEM120A	128.378	124.618	116.482	113.815	81.3909	117.414
CCT6A	99.0032	127.014	125.727	121.664	117.877	117.121
DHCR7	101.179	116.23	77.6547	172.685	101.037	117.121
DLGAP4	127.29	116.23	107.237	130.822	78.5844	117.121
NAA10	141.433	98.2564	109.086	112.507	120.683	117.121
PIGT	127.29	107.842	133.122	115.123	92.6173	117.121
CHMP5	102.267	118.627	136.82	112.507	129.103	116.828
EGLN2	113.147	118.627	127.576	125.589	87.0041	116.828
FOXD3	151.225	82.6792	133.122	94.1918	131.909	116.828
ACTR3	96.8273	135.402	66.5612	142.596	143.136	116.535
CLCN7	150.137	122.221	92.446	109.89	67.358	116.535
EHBP1L1	134.905	88.6704	170.101	90.2671	109.457	116.535
FAM219B	126.202	119.825	81.3525	145.212	75.7778	116.535
PDCD5	108.795	131.807	96.1439	139.979	81.3909	116.535
AKAP6	87.0358	161.764	75.8058	138.671	98.2304	116.243
ARFGAP2	125.114	104.248	105.388	128.205	112.263	116.243
MAN2C1	146.873	86.2739	147.914	116.431	58.9383	116.243
MXD4	124.026	94.6617	123.878	124.281	117.877	116.243
PDGFRB	133.818	93.4634	166.403	92.8836	98.2304	116.243
PER1	157.752	80.2827	149.763	88.9589	101.037	116.243
UBQLN1	96.8273	148.583	86.8993	128.205	109.457	116.243
ACAT2	99.0032	123.42	59.1655	187.075	75.7778	115.95
ELOC	91.3876	147.385	107.237	121.664	106.65	115.95
GADD45A	68.5407	135.402	70.259	189.692	103.844	115.95
TBX2	150.137	93.4634	138.669	88.9589	103.844	115.95
ABLIM1	105.531	117.428	103.54	137.363	109.457	115.657
CNTN1	93.5635	147.385	81.3525	134.747	109.457	115.657
MARCH2	127.29	116.23	114.633	116.431	84.1975	115.657
MMP28	163.192	75.4897	110.935	116.431	92.6173	115.657
PRELP	92.4755	74.2914	266.245	58.8699	165.588	115.657
PRRC2B	122.938	101.851	123.878	120.356	106.65	115.657
ARHGEF40	141.433	104.248	125.727	104.658	81.3909	115.364
CTSL	116.41	81.4809	146.065	128.205	117.877	115.364
ERGIC3	125.114	117.428	125.727	113.815	72.9712	115.364
RTKN	163.192	98.2564	92.446	115.123	67.358	115.364
SLC16A3	100.091	146.186	105.388	119.048	89.8107	115.364
SNRPG	142.521	103.049	144.216	83.726	98.2304	115.364
CIC	134.905	95.8599	118.331	108.582	117.877	115.071
PREPL	96.8273	129.411	85.0504	146.521	106.65	115.071
RANGAP1	109.883	129.411	103.54	129.514	81.3909	115.071
SCCPDH	120.762	105.446	86.8993	117.74	159.975	115.071
SND1	132.73	100.653	136.82	107.274	87.0041	115.071
SPHK1	176.247	87.4722	133.122	83.726	61.7449	115.071
TCP1	103.355	149.781	68.4101	122.973	117.877	115.071
TERF2IP	94.6514	123.42	94.295	138.671	129.103	115.071
TNS2	129.466	93.4634	168.252	98.1164	84.1975	115.071
VPS29	113.147	117.428	88.7482	136.055	109.457	115.071
AXL	131.642	93.4634	136.82	94.1918	131.909	114.779
HSPB6	90.2996	184.53	123.878	57.5616	123.49	114.779
IMPDH2	112.059	97.0582	147.914	92.8836	159.975	114.779
LMBRD1	138.169	116.23	120.18	91.5753	92.6173	114.779
POLR2A	106.619	119.825	125.727	120.356	95.4239	114.779
RAD23B	101.179	118.627	99.8417	124.281	143.136	114.779
AARS	107.707	124.618	123.878	115.123	92.6173	114.486
AHSA1	113.147	131.807	97.9928	119.048	92.6173	114.486
MAZ	102.267	121.023	142.367	117.74	81.3909	114.486
MTLN	118.586	141.393	114.633	85.0342	103.844	114.486
AP1M1	97.9153	138.997	83.2014	132.13	106.65	114.193
CCL3	146.873	100.653	79.5036	129.514	81.3909	114.193
ARPC1A	119.674	110.239	103.54	120.356	109.457	113.9
MAPK1	103.355	107.842	101.691	125.589	148.749	113.9
YBX3	121.85	80.2827	179.345	73.2603	159.975	113.9
CYB5A	118.586	113.834	105.388	100.733	140.329	113.607
PGM2L1	90.2996	106.644	70.259	184.459	103.844	113.607
VEGFB	124.026	125.816	120.18	88.9589	101.037	113.607
CAB39	95.7394	138.997	79.5036	130.822	112.263	113.315
HCLS1	108.795	105.446	159.007	87.6507	129.103	113.315
SAP30BP	125.114	107.842	112.784	117.74	87.0041	113.315
TMEM165	125.114	119.825	94.295	111.199	101.037	113.315
AFAP1L2	153.401	83.8774	109.086	95.5	120.683	113.022
CTDNEP1	129.466	107.842	118.331	99.4246	103.844	113.022
CYFIP2	103.355	109.041	75.8058	163.527	95.4239	113.022
TIMM8B	125.114	111.437	92.446	124.281	92.6173	113.022
CD68	129.466	92.2652	164.554	78.4931	112.263	112.729
CENPX	125.114	109.041	110.935	115.123	87.0041	112.729
CORO1A	128.378	88.6704	140.518	103.349	106.65	112.729
NDUFA12	117.498	121.023	122.029	108.582	75.7778	112.729
CTSC	128.378	93.4634	168.252	62.7945	137.523	112.436
RAB10	115.322	105.446	107.237	113.815	126.296	112.436
TNS3	161.016	93.4634	114.633	79.8014	98.2304	112.436
ATL3	97.9153	118.627	105.388	128.205	109.457	112.143
C7	101.179	73.0932	234.813	60.1781	157.169	112.143
IL13RA1	109.883	92.2652	122.029	125.589	120.683	112.143
POLR2G	135.993	93.4634	109.086	120.356	81.3909	112.143
RTN2	105.531	136.6	73.9568	137.363	75.7778	112.143
VPS51	104.443	129.411	125.727	105.966	84.1975	112.143
AOPEP	140.345	81.4809	116.482	104.658	117.877	111.851
PNPLA2	133.818	106.644	120.18	107.274	64.5514	111.851
ARL3	107.707	136.6	77.6547	117.74	101.037	111.558
EMP2	114.234	109.041	114.633	111.199	106.65	111.558
KPNB1	109.883	98.2564	109.086	121.664	129.103	111.558
PGP	80.5081	141.393	75.8058	155.678	81.3909	111.558
SPRYD3	105.531	128.213	96.1439	111.199	112.263	111.558
BZW1	125.114	101.851	110.935	100.733	120.683	111.265
CHMP2A	119.674	101.851	112.784	99.4246	134.716	111.265
CTSH	117.498	73.0932	201.532	83.726	106.65	111.265
CYFIP1	134.905	89.8687	110.935	98.1164	129.103	111.265
FAAP20	138.169	91.0669	118.331	107.274	87.0041	111.265
G6PC3	107.707	134.204	88.7482	109.89	103.844	111.265
HERPUD1	100.091	116.23	127.576	109.89	106.65	111.265
RAD23A	104.443	100.653	131.273	104.658	137.523	111.265
SAR1A	116.41	110.239	101.691	112.507	112.263	111.265
SCAMP3	126.202	92.2652	105.388	132.13	81.3909	111.265
BCL6	125.114	94.6617	127.576	95.5	120.683	110.972
ERI3	90.2996	112.635	123.878	128.205	103.844	110.972
LDLR	120.762	112.635	75.8058	129.514	95.4239	110.972
APC2	113.147	124.618	59.1655	142.596	81.3909	110.679
CCDC124	105.531	111.437	142.367	108.582	78.5844	110.679
CNPY2	122.938	104.248	103.54	111.199	103.844	110.679
CPNE3	97.9153	116.23	85.0504	124.281	140.329	110.679
GLO1	107.707	116.23	94.295	113.815	123.49	110.679
NDUFAF8	114.234	117.428	86.8993	116.431	109.457	110.679
PRELID1	118.586	116.23	116.482	95.5	101.037	110.679
SUSD2	69.6286	207.297	86.8993	75.8767	101.037	110.679
GAL	58.7492	93.4634	51.7698	245.945	81.3909	110.387
HNRNPH3	129.466	91.0669	118.331	96.8082	123.49	110.387
INTS11	137.081	93.4634	114.633	104.658	87.0041	110.387
LIPA	115.322	119.825	109.086	92.8836	115.07	110.387
MRPS6	126.202	99.4547	99.8417	122.973	84.1975	110.387
PSMC6	93.5635	144.988	85.0504	100.733	131.909	110.387
RAP1B	117.498	100.653	120.18	102.041	117.877	110.387
RGL1	110.971	109.041	105.388	119.048	101.037	110.387
SERP1	128.378	92.2652	110.935	104.658	117.877	110.387
SHC2	97.9153	122.221	72.1079	151.753	84.1975	110.387
CADPS	76.1563	138.997	53.6187	172.685	81.3909	110.094
KIF3A	80.5081	154.574	59.1655	132.13	112.263	110.094
MTDH	119.674	101.851	120.18	94.1918	123.49	110.094
PLEKHO1	114.234	105.446	112.784	113.815	98.2304	110.094
TAF7	105.531	113.834	109.086	96.8082	143.136	110.094
CAMTA1	96.8273	121.023	77.6547	137.363	106.65	109.801
CBX6	124.026	89.8687	120.18	99.4246	126.296	109.801
VAMP5	141.433	79.0844	153.46	73.2603	112.263	109.801
MFSD12	139.257	91.0669	110.935	102.041	89.8107	109.508
NONO	118.586	100.653	131.273	71.952	154.362	109.508
RAB3A	73.9804	201.306	53.6187	100.733	89.8107	109.508
ZMIZ1	120.762	94.6617	107.237	104.658	129.103	109.508
ADRM1	94.6514	121.023	112.784	115.123	101.037	109.215
MAP3K11	139.257	85.0757	136.82	95.5	75.7778	109.215
SGCB	150.137	83.8774	94.295	99.4246	106.65	109.215
ATRAID	116.41	89.8687	107.237	102.041	151.556	108.923
CDC42SE1	126.202	87.4722	151.612	92.8836	84.1975	108.923
CIB1	104.443	100.653	125.727	119.048	92.6173	108.923
COLGALT1	124.026	82.6792	147.914	99.4246	92.6173	108.923
COPA	107.707	136.6	75.8058	104.658	106.65	108.923
ELAVL4	66.3648	122.221	38.8273	193.616	112.263	108.923
ITGA6	140.345	77.8862	133.122	62.7945	162.782	108.923
SRSF11	124.026	91.0669	112.784	96.8082	131.909	108.923
TRIM36	73.9804	156.971	59.1655	141.288	92.6173	108.923
ABTB1	113.147	105.446	116.482	108.582	92.6173	108.63
AGT	93.5635	125.816	138.669	86.3425	109.457	108.63
CYHR1	126.202	107.842	147.914	85.0342	56.1317	108.63
HMGCR	81.5961	109.041	70.259	167.452	109.457	108.63
LASP1	124.026	82.6792	109.086	109.89	126.296	108.63
MFSD2A	125.114	133.006	53.6187	108.582	92.6173	108.63
SUGP2	115.322	129.411	86.8993	107.274	78.5844	108.63
TMEM205	126.202	103.049	97.9928	98.1164	115.07	108.63
UFC1	89.2117	124.618	66.5612	137.363	123.49	108.63
VAMP8	107.707	105.446	149.763	91.5753	92.6173	108.63
GFAP	144.697	88.6704	134.971	68.0274	106.65	108.337
HADHB	120.762	93.4634	99.8417	120.356	98.2304	108.337
MEGF9	139.257	105.446	68.4101	105.966	101.037	108.337
NFE2L2	115.322	97.0582	110.935	81.1096	171.202	108.337
PSMA2	89.2117	111.437	114.633	132.13	89.8107	108.337
RBM5	135.993	88.6704	120.18	103.349	75.7778	108.337
UHMK1	84.8599	161.764	61.0144	112.507	106.65	108.337
ITPRID2	139.257	80.2827	131.273	82.4178	112.263	108.044
MRPL28	108.795	117.428	92.446	122.973	75.7778	108.044
OLFML2A	131.642	109.041	90.5971	83.726	123.49	108.044
PCOLCE	119.674	74.2914	192.288	56.2534	140.329	108.044
PEF1	79.4202	130.609	118.331	132.13	61.7449	108.044
SAMD4B	149.049	75.4897	96.1439	91.5753	131.909	108.044
AP2A1	109.883	128.213	83.2014	109.89	87.0041	107.751
EMC3	87.0358	128.213	110.935	113.815	95.4239	107.751
PAPOLA	117.498	98.2564	131.273	85.0342	117.877	107.751
RAB18	96.8273	130.609	75.8058	122.973	98.2304	107.751
RBM8A	118.586	95.8599	114.633	100.733	112.263	107.751
TGFBI	112.059	73.0932	208.928	70.6438	103.844	107.751
COL16A1	113.147	83.8774	118.331	137.363	67.358	107.458
CTNND1	125.114	103.049	97.9928	94.1918	115.07	107.458
MMP2	99.0032	80.2827	179.345	79.8014	143.136	107.458
RCAN1	122.938	110.239	109.086	90.2671	95.4239	107.458
SAT2	119.674	95.8599	120.18	100.733	98.2304	107.458
CCT8	96.8273	127.014	90.5971	125.589	72.9712	107.166
HARS	90.2996	118.627	73.9568	145.212	92.6173	107.166
RER1	124.026	99.4547	97.9928	104.658	101.037	107.166
AMFR	115.322	99.4547	99.8417	117.74	89.8107	106.873
BANF1	124.026	93.4634	109.086	90.2671	126.296	106.873
GPR37L1	130.554	110.239	81.3525	96.8082	98.2304	106.873
NDRG3	77.2443	160.565	62.8633	119.048	98.2304	106.873
RAB11B	79.4202	112.635	92.446	153.062	87.0041	106.873
SEC62	109.883	104.248	94.295	82.4178	176.815	106.873
SNAP91	66.3648	150.979	42.5252	170.068	70.1646	106.873
STAT6	116.41	98.2564	140.518	85.0342	98.2304	106.873
STRAP	90.2996	117.428	75.8058	154.37	70.1646	106.873
ATP5F1C	102.267	119.825	79.5036	116.431	106.65	106.58
IP6K2	127.29	92.2652	97.9928	119.048	72.9712	106.58
UROD	108.795	113.834	88.7482	122.973	75.7778	106.58
CALB2	90.2996	106.644	49.9209	188.384	56.1317	106.287
MKNK2	131.642	70.6967	112.784	99.4246	129.103	106.287
PGLS	106.619	81.4809	110.935	139.979	84.1975	106.287
RABL6	97.9153	103.049	114.633	116.431	101.037	106.287
RCN1	121.85	81.4809	112.784	98.1164	131.909	106.287
ST6GALNAC6	109.883	103.049	120.18	102.041	92.6173	106.287
ANP32B	129.466	70.6967	116.482	94.1918	137.523	105.994
ARHGAP35	124.026	121.023	66.5612	96.8082	103.844	105.994
CENPB	107.707	81.4809	133.122	86.3425	159.975	105.994
ECH1	112.059	116.23	103.54	102.041	78.5844	105.994
EML3	134.905	79.0844	146.065	81.1096	87.0041	105.994
GLUD1	96.8273	113.834	96.1439	112.507	112.263	105.994
IRF9	129.466	83.8774	118.331	103.349	84.1975	105.994
ITPR3	150.137	75.4897	112.784	102.041	61.7449	105.994
NRXN3	130.554	87.4722	64.7122	113.815	131.909	105.994
RNF13	107.707	110.239	75.8058	104.658	140.329	105.994
TMEM9	109.883	101.851	97.9928	112.507	103.844	105.994
AGPAT1	108.795	88.6704	107.237	120.356	103.844	105.702
PLOD3	151.225	75.4897	122.029	73.2603	103.844	105.702
PROS1	130.554	73.0932	127.576	87.6507	123.49	105.702
BTBD2	101.179	95.8599	99.8417	129.514	95.4239	105.409
FGL2	97.9153	109.041	116.482	91.5753	129.103	105.409
FKBP3	92.4755	141.393	73.9568	117.74	75.7778	105.409
GARS	73.9804	131.807	64.7122	143.904	103.844	105.409
NDUFA5	80.5081	118.627	79.5036	142.596	98.2304	105.409
NPEPPS	99.0032	111.437	79.5036	132.13	89.8107	105.409
SERPINA1	120.762	106.644	94.295	100.733	89.8107	105.409
FKBP9	118.586	113.834	94.295	85.0342	109.457	105.116
MBOAT7	102.267	97.0582	83.2014	147.829	72.9712	105.116
PTPN18	128.378	83.8774	125.727	91.5753	92.6173	105.116
TAFA5	132.73	98.2564	90.5971	100.733	81.3909	105.116
UBE2Z	91.3876	109.041	112.784	111.199	106.65	105.116
CLIP2	93.5635	119.825	64.7122	133.438	98.2304	104.823
DYNC1I1	67.4527	142.592	66.5612	141.288	92.6173	104.823
FLNB	135.993	83.8774	122.029	83.726	92.6173	104.823
LTBR	119.674	75.4897	133.122	100.733	101.037	104.823
PWWP3A	125.114	93.4634	90.5971	115.123	78.5844	104.823
ANGPTL7	133.818	76.6879	122.029	64.1027	154.362	104.53
HGS	112.059	88.6704	103.54	124.281	81.3909	104.53
LGI3	84.8599	168.953	55.4676	105.966	75.7778	104.53
RBIS	115.322	110.239	99.8417	82.4178	117.877	104.53
CAPZA1	93.5635	75.4897	151.612	112.507	109.457	104.238
IST1	126.202	105.446	96.1439	98.1164	70.1646	104.238
KDELR1	117.498	98.2564	110.935	100.733	81.3909	104.238
LUC7L3	120.762	93.4634	97.9928	99.4246	106.65	104.238
NPLOC4	97.9153	137.799	77.6547	105.966	78.5844	104.238
TSPYL1	79.4202	122.221	79.5036	147.829	70.1646	104.238
CNDP2	92.4755	99.4547	120.18	107.274	112.263	103.945
GFRA3	110.971	79.0844	110.935	116.431	106.65	103.945
NRCAM	87.0358	119.825	51.7698	151.753	87.0041	103.945
SEC11A	114.234	88.6704	118.331	87.6507	126.296	103.945
TPM1	95.7394	115.032	122.029	94.1918	92.6173	103.945
AVIL	72.8925	135.402	40.6763	163.527	75.7778	103.652
CRTAP	119.674	73.0932	125.727	88.9589	131.909	103.652
GRASP	124.026	88.6704	144.216	81.1096	72.9712	103.652
ILF2	115.322	89.8687	114.633	104.658	87.0041	103.652
MIEN1	91.3876	121.023	75.8058	137.363	64.5514	103.652
NUDCD3	99.0032	99.4547	77.6547	128.205	112.263	103.652
PXN	112.059	88.6704	129.424	102.041	81.3909	103.652
SPAG9	113.147	98.2564	96.1439	103.349	103.844	103.652
PRRC2A	107.707	89.8687	110.935	108.582	101.037	103.359
RALBP1	102.267	106.644	92.446	83.726	157.169	103.359
SDC3	120.762	100.653	81.3525	105.966	92.6173	103.359
CAPRIN1	100.091	112.635	79.5036	116.431	95.4239	103.066
COBL	126.202	93.4634	77.6547	103.349	103.844	103.066
HMGN3	124.026	97.0582	79.5036	107.274	89.8107	103.066
RHOG	119.674	85.0757	134.971	78.4931	106.65	103.066
SYBU	80.5081	138.997	66.5612	122.973	89.8107	103.066
VPS4A	96.8273	116.23	77.6547	119.048	92.6173	103.066
CLDN11	130.554	70.6967	147.914	60.1781	129.103	102.774
ENSA	97.9153	93.4634	122.029	113.815	84.1975	102.774
MLLT6	126.202	92.2652	120.18	70.6438	109.457	102.774
PSMD1	79.4202	111.437	86.8993	125.589	117.877	102.774
RNF167	107.707	103.049	107.237	95.5	98.2304	102.774
RTCA	79.4202	121.023	68.4101	150.445	70.1646	102.774
STMN4	58.7492	110.239	61.0144	188.384	78.5844	102.774
TTC3	94.6514	104.248	83.2014	107.274	140.329	102.774
ATP2C1	90.2996	104.248	73.9568	134.747	103.844	102.481
GRK2	120.762	80.2827	123.878	103.349	72.9712	102.481
IFNGR1	96.8273	85.0757	131.273	86.3425	148.749	102.481
RAB5A	114.234	98.2564	99.8417	92.8836	106.65	102.481
S100A16	137.081	94.6617	129.424	57.5616	87.0041	102.481
SNX6	110.971	77.8862	120.18	92.8836	131.909	102.481
FGF1	89.2117	142.592	92.446	86.3425	89.8107	102.188
PGD	77.2443	105.446	75.8058	136.055	126.296	102.188
SEMA3C	151.225	79.0844	105.388	65.411	103.844	102.188
SLC1A5	110.971	81.4809	125.727	82.4178	134.716	102.188
VOPP1	96.8273	95.8599	105.388	107.274	115.07	102.188
PIP5K1C	96.8273	103.049	86.8993	119.048	98.2304	101.895
SIPA1	118.586	73.0932	138.669	95.5	84.1975	101.895
ATP6V1A	92.4755	124.618	55.4676	136.055	67.358	101.602
LMF2	119.674	87.4722	116.482	87.6507	95.4239	101.602
MICAL1	132.73	62.309	129.424	103.349	67.358	101.602
RAP1A	114.234	77.8862	101.691	86.3425	157.169	101.602
SLC25A5	88.1237	106.644	88.7482	100.733	145.942	101.602
PPP3CB	93.5635	133.006	49.9209	120.356	84.1975	101.31
RAB3D	69.6286	135.402	68.4101	134.747	81.3909	101.31
SBNO2	107.707	79.0844	122.029	122.973	58.9383	101.31
AMD1	91.3876	93.4634	96.1439	113.815	123.49	101.017
B4GALT2	80.5081	94.6617	72.1079	160.911	84.1975	101.017
CDK16	108.795	104.248	81.3525	122.973	56.1317	101.017
MADD	112.059	103.049	97.9928	99.4246	75.7778	101.017
MED15	105.531	97.0582	96.1439	111.199	84.1975	101.017
NUDT16	96.8273	97.0582	123.878	92.8836	103.844	101.017
OAF	122.938	61.1107	136.82	83.726	120.683	101.017
PIRT	77.2443	97.0582	49.9209	171.377	98.2304	101.017
PRKCA	125.114	75.4897	92.446	103.349	106.65	101.017
SCG5	48.9576	158.169	22.1871	170.068	72.9712	101.017
HIF1A	85.9479	99.4547	112.784	91.5753	143.136	100.724
VCL	118.586	80.2827	109.086	91.5753	109.457	100.724
DBNDD2	99.0032	110.239	96.1439	95.5	98.2304	100.431
EIF3A	89.2117	85.0757	101.691	100.733	162.782	100.431
IMMT	90.2996	117.428	101.691	94.1918	98.2304	100.431
MFSD1	90.2996	92.2652	133.122	108.582	78.5844	100.431
PCYT2	101.179	101.851	86.8993	121.664	70.1646	100.431
PEMT	85.9479	107.842	81.3525	125.589	95.4239	100.431
UBE2I	138.169	79.0844	88.7482	86.3425	101.037	100.431
CASKIN2	114.234	93.4634	125.727	70.6438	103.844	100.138
DUSP23	101.179	100.653	112.784	100.733	75.7778	100.138
KIDINS220	109.883	89.8687	83.2014	103.349	117.877	100.138
OGT	132.73	68.3002	109.086	96.8082	84.1975	100.138
TMEM14C	94.6514	117.428	96.1439	102.041	75.7778	100.138
TMEM50B	100.091	91.0669	116.482	107.274	81.3909	100.138
CNTNAP1	95.7394	93.4634	53.6187	158.295	70.1646	99.8456
GOT2	72.8925	133.006	57.3166	129.514	92.6173	99.8456
KIF5B	85.9479	104.248	97.9928	90.2671	148.749	99.8456
LONP1	96.8273	92.2652	109.086	105.966	98.2304	99.8456
LTBP1	134.905	87.4722	81.3525	70.6438	129.103	99.8456
PRR13	100.091	100.653	92.446	122.973	58.9383	99.8456
RGS4	88.1237	71.8949	59.1655	185.767	72.9712	99.8456
SESN3	141.433	85.0757	88.7482	75.8767	95.4239	99.8456
SRI	122.938	68.3002	88.7482	116.431	95.4239	99.8456
TIMM17A	69.6286	129.411	96.1439	112.507	87.0041	99.8456
ARPC5L	88.1237	121.023	77.6547	108.582	92.6173	99.5528
CXXC5	128.378	77.8862	105.388	82.4178	103.844	99.5528
FGFBP3	96.8273	110.239	38.8273	125.589	117.877	99.5528
GSDMD	140.345	76.6879	142.367	62.7945	61.7449	99.5528
GSTM3	87.0358	117.428	86.8993	112.507	81.3909	99.5528
PPP2R2B	91.3876	121.023	49.9209	121.664	98.2304	99.5528
SIRT2	107.707	93.4634	109.086	92.8836	92.6173	99.5528
SSNA1	100.091	112.635	73.9568	116.431	70.1646	99.5528
TMEM160	89.2117	110.239	123.878	87.6507	89.8107	99.5528
TNFAIP2	117.498	80.2827	107.237	105.966	72.9712	99.5528
BBS2	113.147	88.6704	83.2014	109.89	89.8107	99.26
IFNAR1	95.7394	112.635	92.446	98.1164	89.8107	99.26
MPST	129.466	63.5072	109.086	91.5753	106.65	99.26
MYO15B	140.345	63.5072	125.727	94.1918	47.7119	99.26
RAB15	72.8925	110.239	59.1655	163.527	64.5514	99.26
REXO2	85.9479	119.825	68.4101	124.281	78.5844	99.26
ZNF358	118.586	75.4897	110.935	95.5	95.4239	99.26
BEX4	93.5635	97.0582	72.1079	122.973	106.65	98.9672
COL12A1	139.257	83.8774	112.784	73.2603	64.5514	98.9672
MRPS34	97.9153	99.4547	90.5971	105.966	98.2304	98.9672
POLR2J	95.7394	105.446	114.633	75.8767	117.877	98.9672
PPP1R14B	107.707	83.8774	136.82	79.8014	95.4239	98.9672
ALPL	99.0032	103.049	110.935	98.1164	70.1646	98.6744
ARHGEF26	130.554	67.102	79.5036	96.8082	123.49	98.6744
CLASP1	76.1563	127.014	62.8633	124.281	89.8107	98.6744
EIF3D	106.619	89.8687	112.784	74.5685	129.103	98.6744
HMGN1	106.619	75.4897	107.237	85.0342	148.749	98.6744
MARVELD1	132.73	77.8862	88.7482	92.8836	87.0041	98.6744
MRGPRE	78.3322	118.627	85.0504	115.123	89.8107	98.6744
VAMP3	116.41	88.6704	103.54	91.5753	84.1975	98.6744
ACTR1B	116.41	82.6792	83.2014	119.048	67.358	98.3816
MAN1B1	101.179	101.851	85.0504	92.8836	115.07	98.3816
PFDN2	78.3322	106.644	88.7482	120.356	98.2304	98.3816
PPP1R7	78.3322	104.248	105.388	116.431	87.0041	98.3816
TLE1	124.026	101.851	96.1439	77.1849	72.9712	98.3816
ACAT1	90.2996	110.239	96.1439	88.9589	112.263	98.0888
BNIP3L	117.498	77.8862	86.8993	91.5753	126.296	98.0888
SCN4B	66.3648	160.565	36.9784	109.89	101.037	98.0888
TMEM109	103.355	86.2739	155.309	60.1781	106.65	98.0888
ANAPC5	118.586	97.0582	103.54	83.726	67.358	97.796
CRK	94.6514	89.8687	79.5036	105.966	134.716	97.796
CSNK1E	119.674	69.4984	109.086	105.966	72.9712	97.796
EPS15	91.3876	117.428	79.5036	99.4246	92.6173	97.796
MINK1	117.498	87.4722	86.8993	98.1164	87.0041	97.796
NDUFV3	76.1563	129.411	103.54	88.9589	89.8107	97.796
TMEM147	118.586	83.8774	103.54	81.1096	103.844	97.796
ADAMTS1	73.9804	71.8949	249.604	48.4041	92.6173	97.5032
DAZAP1	104.443	80.2827	114.633	100.733	87.0041	97.5032
DEGS1	103.355	89.8687	101.691	98.1164	92.6173	97.5032
HNRNPAB	97.9153	79.0844	125.727	103.349	84.1975	97.5032
MRPL55	85.9479	121.023	92.446	95.5	84.1975	97.5032
PDE4DIP	101.179	109.041	81.3525	102.041	75.7778	97.5032
RNF10	79.4202	91.0669	99.8417	121.664	103.844	97.5032
SERPINH1	97.9153	73.0932	136.82	88.9589	112.263	97.5032
SRSF9	88.1237	93.4634	97.9928	104.658	115.07	97.5032
ATP2A2	106.619	104.248	88.7482	92.8836	78.5844	97.2104
DEF8	106.619	98.2564	73.9568	111.199	75.7778	97.2104
EIF2S2	89.2117	99.4547	96.1439	99.4246	109.457	97.2104
GNAQ	103.355	99.4547	70.259	115.123	78.5844	97.2104
CALU	93.5635	70.6967	146.065	83.726	120.683	96.9176
CDC42EP5	119.674	93.4634	96.1439	81.1096	81.3909	96.9176
DNM1L	78.3322	94.6617	75.8058	128.205	115.07	96.9176
ELOVL1	110.971	86.2739	110.935	96.8082	64.5514	96.9176
MYO9B	109.883	67.102	138.669	99.4246	64.5514	96.9176
POLR2K	90.2996	112.635	88.7482	104.658	72.9712	96.9176
PTPRZ1	117.498	98.2564	66.5612	91.5753	98.2304	96.9176
TFG	59.8371	106.644	92.446	126.897	112.263	96.9176
TPCN1	102.267	117.428	83.2014	98.1164	53.3251	96.9176
UBE2V2	96.8273	116.23	68.4101	103.349	81.3909	96.9176
ADH5	108.795	81.4809	110.935	91.5753	89.8107	96.6248
C18orf32	77.2443	118.627	81.3525	116.431	75.7778	96.6248
ERBIN	129.466	76.6879	94.295	73.2603	112.263	96.6248
GOLM1	59.8371	91.0669	77.6547	172.685	70.1646	96.6248
LAMC1	127.29	63.5072	101.691	95.5	89.8107	96.6248
NDUFS3	93.5635	122.221	96.1439	86.3425	67.358	96.6248
PRKCZ	91.3876	104.248	53.6187	146.521	50.5185	96.6248
SCRN1	102.267	99.4547	73.9568	103.349	95.4239	96.6248
SPINT2	89.2117	103.049	68.4101	121.664	89.8107	96.6248
ARHGAP1	110.971	75.4897	96.1439	105.966	87.0041	96.332
CD46	102.267	89.8687	99.8417	102.041	78.5844	96.332
CRAT	80.5081	112.635	85.0504	120.356	64.5514	96.332
LARP6	73.9804	107.842	62.8633	149.137	64.5514	96.332
MT-ND4L	72.8925	106.644	96.1439	66.7192	196.461	96.332
RBFOX2	77.2443	105.446	88.7482	116.431	92.6173	96.332
SYN2	67.4527	135.402	61.0144	115.123	92.6173	96.332
TCEA2	90.2996	100.653	92.446	109.89	78.5844	96.332
TNFSF13	103.355	95.8599	110.935	78.4931	95.4239	96.332
AP3S2	73.9804	121.023	66.5612	125.589	75.7778	96.0392
DMD	119.674	80.2827	101.691	70.6438	117.877	96.0392
EIF2S3	105.531	91.0669	94.295	77.1849	126.296	96.0392
PRCP	104.443	100.653	92.446	82.4178	98.2304	96.0392
RALA	55.4853	115.032	72.1079	141.288	95.4239	96.0392
TMEM208	78.3322	127.014	79.5036	108.582	67.358	96.0392
CYP27A1	119.674	76.6879	110.935	75.8767	98.2304	95.7464
LAIR1	103.355	91.0669	127.576	81.1096	70.1646	95.7464
MRPL27	81.5961	124.618	96.1439	92.8836	70.1646	95.7464
NDUFA7	73.9804	127.014	77.6547	109.89	75.7778	95.7464
STX7	104.443	97.0582	81.3525	98.1164	87.0041	95.7464
CAV1	89.2117	82.6792	127.576	88.9589	106.65	95.4536
CYCS	80.5081	100.653	86.8993	112.507	98.2304	95.4536
DNAJB6	91.3876	94.6617	94.295	94.1918	112.263	95.4536
FNTA	118.586	79.0844	105.388	87.6507	75.7778	95.4536
PMVK	103.355	91.0669	79.5036	112.507	72.9712	95.4536
TMEM50A	99.0032	81.4809	105.388	86.3425	123.49	95.4536
AK2	105.531	92.2652	92.446	96.8082	75.7778	95.1608
AKR1A1	117.498	81.4809	101.691	78.4931	95.4239	95.1608
CACYBP	89.2117	107.842	66.5612	104.658	103.844	95.1608
ESD	102.267	91.0669	92.446	88.9589	103.844	95.1608
FLII	87.0358	95.8599	103.54	98.1164	95.4239	95.1608
FXR2	92.4755	105.446	72.1079	111.199	78.5844	95.1608
FXYD6	84.8599	76.6879	97.9928	122.973	101.037	95.1608
GNAZ	88.1237	104.248	64.7122	132.13	58.9383	95.1608
PKN1	104.443	87.4722	129.424	71.952	87.0041	95.1608
PMEPA1	134.905	51.5247	147.914	45.7877	120.683	95.1608
SLC4A2	118.586	80.2827	131.273	64.1027	81.3909	95.1608
TBC1D9B	88.1237	87.4722	101.691	113.815	81.3909	95.1608
ADD2	63.101	113.834	48.0719	150.445	84.1975	94.868
BMERB1	73.9804	116.23	44.3741	139.979	78.5844	94.868
CNST	65.2768	141.393	59.1655	121.664	58.9383	94.868
GTF3A	96.8273	100.653	85.0504	91.5753	98.2304	94.868
PLS3	66.3648	135.402	81.3525	108.582	64.5514	94.868
RAB14	95.7394	85.0757	105.388	95.5	98.2304	94.868
XPO1	99.0032	93.4634	97.9928	83.726	106.65	94.868
CDC25B	117.498	77.8862	85.0504	103.349	70.1646	94.5752
DMTN	80.5081	128.213	27.7338	121.664	95.4239	94.5752
EFS	143.609	68.3002	61.0144	99.4246	70.1646	94.5752
KXD1	90.2996	99.4547	90.5971	108.582	70.1646	94.5752
MAP6	58.7492	116.23	40.6763	153.062	92.6173	94.5752
MAST1	68.5407	140.195	51.7698	116.431	72.9712	94.5752
PABPC4	99.0032	79.0844	99.8417	70.6438	162.782	94.5752
PARVA	97.9153	83.8774	94.295	96.8082	106.65	94.5752
SCAMP2	108.795	80.2827	125.727	70.6438	95.4239	94.5752
[truncated: 17,395 more rows]

## Sheet: no_mt_rpl
Gene	Cluster0 (CPM)	Cluster1 (CPM)	Cluster2 (CPM)	Cluster3 (CPM)	Cluster4 (CPM)	All Nodules (CPM)
APOD	8131.53	5428.18	15381.3	4732.81	13470	8339.21
TMSB10	7021.3	7099.32	7751.08	7541.78	6504.26	7220.39
FTH1	7035.99	6338.97	6647.8	6038.06	6985.69	6571.42
S100A6	6668.76	4911.79	5697.8	5610.7	5554.69	5734.37
VIM	7064.14	4666.47	6345.53	3852.02	7746.02	5697.16
FTL	5148.46	4207.01	7241.54	3860.71	5886.71	5018.28
TUBA1A	3495.96	5815.81	2988.16	7673.61	3818.23	4977.08
CLU	4704.12	4200.23	3469.64	5457.14	4073.88	4500.24
CD74	5623.4	3466.98	4890.31	3284.14	4731.28	4356.02
ACTB	4459.31	4066.05	4635.54	3889.68	4346.14	4248.03
EEF1A1	4021.09	3240.64	5460.3	2817.66	5733.98	3946.64
B2M	4303.85	3277.24	4665.76	3174.04	5010.18	3919.39
PSAP	3959.88	3931.87	3407.02	3992.54	3217.27	3801.09
GAPDH	3131.19	4558.04	2774.41	4828.42	2818.85	3784.15
TMSB4X	3281.75	3881.72	3607.82	3542	4289.69	3639.6
ACTG1	3034.48	3598.45	3081	4040.34	3286.99	3435.91
NEFH	1913.23	6402.67	1938.85	2920.52	2775.68	3335.22
TUBA1B	2386.95	3964.4	2018.74	4483.64	2765.72	3235.87
GPX3	3536.35	2348.82	5127.81	2071.6	3635.62	3164.09
CST3	3852.17	2542.64	3704.98	2427.97	2901.85	3086.67
NEFL	1554.58	5970.32	1427.15	2655.41	2400.5	2954.75
S100A10	2672.16	3365.33	1876.24	3659.34	2450.3	2923.84
HLA-B	3247.47	2428.79	3430.77	2446.8	3320.2	2898.59
UCHL1	1844.68	3983.37	1517.83	4173.62	2178.05	2886.29
TUBB2A	1792.05	3362.62	1321.35	4640.09	1862.63	2765.01
MAP1B	1796.94	3636.4	1366.7	3791.17	2373.94	2696.89
APOE	2838.63	2762.2	2223.85	2361.33	2284.3	2560.31
LGALS1	2164.17	2764.91	2245.44	2730.74	2553.23	2492.86
PTGDS	2397.96	2558.9	2159.08	2325.12	2347.38	2378.88
FCGBP	2659.92	2146.87	2627.6	1870.23	2144.85	2296.47
CD81	2524.04	2061.49	2245.44	2060.01	2124.93	2221.38
UBC	2247.4	2226.84	2094.3	2261.37	2168.09	2214.07
STMN2	1350.16	2720.19	1023.4	3673.83	1753.06	2209.08
PRPH	1418.7	2664.62	1081.7	3631.82	1633.54	2201.44
IFITM3	2632.99	1705.03	3072.37	1522.55	2314.18	2186.49
TPT1	2046.65	1877.16	2936.34	1637	2878.61	2131.32
MT3	2247.4	2365.09	1625.78	1958.6	2144.85	2104.08
TUBB3	1370.96	2775.76	1191.81	2907.48	1636.86	2066.86
MT2A	2484.87	1676.57	2215.21	1573.26	2025.32	1990.1
NEFM	965.796	4246.31	1003.97	1422.59	1547.21	1938.93
THY1	1397.89	2375.93	1049.31	2720.6	1547.21	1902.38
S100B	2040.53	2201.09	1351.58	1778.97	1533.93	1863.16
CD59	1979.33	1942.22	1668.97	1647.14	1915.75	1839.9
SPP1	1735.74	2492.49	1450.9	1131.41	1982.16	1763.48
HSP90AA1	1329.35	2081.82	1159.42	2099.12	1826.11	1713.97
PMP22	2016.05	1421.76	1709.99	1411.01	2201.29	1703
SERPINA3	1854.47	1905.62	1792.03	1064.77	2111.64	1702
GSN	1936.49	1291.65	1943.17	1341.47	1816.15	1630.89
CTSB	1454.2	1771.44	2027.37	1387.83	1563.81	1615.94
SPARC	1960.97	1429.89	1653.85	1284.97	1809.51	1613.28
C1QB	1674.54	1452.93	2312.37	1187.91	1560.49	1595.34
CTSD	1476.24	1822.95	1513.51	1568.91	1520.65	1592.68
LGI4	2248.63	1177.8	1584.76	1308.15	1311.48	1574.4
ANXA2	1356.28	1639.97	1280.33	1881.82	1494.09	1548.48
MYL6	1509.29	1584.4	1742.37	1403.76	1504.05	1538.85
HLA-DRA	1893.64	1202.2	1751.01	1115.48	1865.95	1520.9
ITM2B	1624.35	1503.08	1431.47	1411.01	1321.44	1485.68
SERF2	1450.53	1360.77	1746.69	1309.6	1258.35	1422.54
IGFBP7	1465.22	1023.29	2413.85	830.088	1723.18	1383
UBB	1135.94	1679.28	1109.77	1492.13	1238.43	1357.08
HSPB1	1298.74	1355.35	1288.97	1424.04	1334.72	1343.46
PPIA	1128.6	1478.69	1163.74	1508.07	1175.35	1311.56
PKM	1020.88	1699.61	891.699	1667.42	956.217	1309.23
ATP5F1E	1193.47	1391.94	1181.01	1355.96	1450.93	1303.25
HLA-A	1367.29	1068.02	1491.92	1182.12	1490.77	1282.98
CALM2	1204.49	1394.65	1120.56	1340.02	1321.44	1280.99
LPL	1412.58	1306.56	842.04	1279.18	1188.63	1245.76
TUBB	1083.31	1347.22	928.403	1616.72	1012.66	1239.45
SNCG	932.746	1785	652.041	1554.42	866.571	1234.47
GNAS	1079.63	1240.14	978.062	1593.54	1105.63	1223.83
SELENOW	1161.65	1301.14	1098.97	1392.17	972.818	1220.18
MIF	1112.68	1378.39	1193.97	1215.43	1152.11	1217.85
HSP90AB1	927.849	1526.12	777.268	1513.86	1191.95	1212.2
CD63	1257.13	1154.76	1319.2	1016.97	1235.11	1184.29
FAU	1221.63	1066.66	1498.4	967.712	1172.03	1163.02
YWHAH	845.836	1467.84	790.222	1526.9	946.256	1156.05
HSPA8	881.334	1438.03	822.608	1424.04	919.694	1137.11
C1QA	1167.77	965.009	1673.28	769.244	1331.4	1120.82
ENO1	1157.98	1108.68	969.425	1076.36	1102.31	1092.58
HLA-C	1239.99	998.893	1109.77	1054.63	873.212	1081.61
YWHAG	755.255	1499.02	639.087	1357.4	876.532	1069.98
TUBB2B	731.997	1222.53	518.178	1757.24	743.724	1055.69
SEMA3B	1594.97	776.615	1148.63	735.925	843.33	1053.37
A2M	1074.74	1002.96	1567.49	653.35	1215.19	1050.38
UBA52	1006.19	971.786	1234.99	985.096	1142.15	1041.74
SCD	1099.22	1153.4	615.337	1073.46	1052.5	1027.45
C3	1088.2	1089.7	1066.58	848.921	1009.34	1022.46
CFL1	953.555	1074.79	988.857	996.685	1132.19	1016.48
CALCA	596.125	857.936	500.906	2104.92	707.202	1002.86
SERPING1	1139.61	791.524	1409.88	708.4	1162.07	999.204
NDRG2	1295.07	805.078	852.835	921.355	800.167	971.624
CRYAB	1310.98	721.046	924.085	835.883	1025.94	969.297
TPI1	788.305	1221.17	783.745	1076.36	833.369	964.313
TIMP2	974.364	860.647	798.858	1109.68	1049.18	958
OAZ1	872.766	962.298	880.903	1103.89	876.532	949.36
ATP1A1	769.944	1356.7	660.677	1014.07	687.281	944.708
EIF1	971.916	866.068	1001.81	922.803	913.054	933.41
CALM3	637.743	1081.57	641.246	1319.74	846.65	924.438
H3F3B	1195.92	673.609	1232.83	683.773	876.532	924.106
PTMA	956.003	711.559	1358.06	553.392	1537.25	923.773
SOD1	712.412	1211.68	611.019	1087.95	800.167	914.137
TXNIP	1013.53	631.593	1539.42	564.982	1135.51	910.149
AHNAK	1157.98	608.552	1159.42	691.016	1082.38	908.82
ATP6V0C	707.516	1002.96	766.472	1083.61	929.655	897.522
CAPNS1	744.238	959.588	775.108	1085.05	820.089	887.554
RTN4	585.108	1233.37	533.292	1169.08	733.763	884.895
ALDOC	716.084	1274.03	537.61	924.252	727.123	874.262
RTN3	609.59	1303.85	507.383	1043.04	710.522	873.597
HLA-DRB1	1091.88	723.757	1003.97	647.556	942.936	871.271
PEBP1	843.388	966.364	598.064	1015.52	760.325	866.951
RACK1	829.923	777.971	1219.88	696.811	1025.94	866.287
GLUL	872.766	657.345	1256.58	679.427	1115.59	858.976
UQCR11	761.375	941.968	794.54	957.571	703.882	850.004
COX4I1	706.292	1059.88	727.609	928.598	717.162	848.343
EEF2	828.699	771.194	1064.42	824.294	780.246	845.02
IFITM2	997.622	603.131	1232.83	596.852	889.813	834.387
ATP5F1B	663.449	1066.66	708.177	911.214	743.724	834.054
YWHAZ	674.466	954.166	550.564	1116.93	700.561	828.073
HINT1	694.051	1069.37	628.291	925.701	610.916	820.763
ENO2	618.158	1091.06	569.996	1047.39	567.754	820.098
ATP5ME	768.719	872.845	734.086	883.689	790.207	817.44
NDRG1	1046.58	670.898	921.926	683.773	640.798	811.459
GNG3	555.73	1129.01	468.52	1076.36	600.956	806.806
CD99	844.612	815.92	675.791	930.047	567.754	803.483
CALM1	635.295	924.348	621.814	976.404	707.202	789.527
KLC1	571.643	1012.45	479.315	1030	654.079	778.894
RTN1	416.186	1061.24	373.52	1284.97	521.271	777.565
ADIRF	942.538	618.039	889.539	589.609	946.256	774.242
C1R	929.073	624.816	1064.42	499.791	876.532	771.583
SPTAN1	614.486	1027.36	505.224	945.982	574.394	770.919
TOMM7	850.733	795.59	725.45	672.183	786.887	770.587
SPARCL1	675.69	710.203	1064.42	559.187	1065.78	756.298
ELOB	727.101	750.864	777.268	727.233	753.685	743.339
PFN1	709.964	748.153	906.812	637.415	813.448	743.339
SPTBN1	815.234	719.691	649.882	712.746	776.926	739.019
DCN	627.951	504.19	1427.15	451.985	1125.55	730.047
EEF1G	725.877	702.071	880.903	585.263	873.212	726.392
COX7C	559.403	936.547	578.632	831.537	614.236	722.736
NME2	697.723	740.021	701.7	776.487	657.399	722.736
MIA	883.783	680.386	798.858	499.791	780.246	722.404
NDUFA4	572.867	947.389	580.792	754.757	650.758	715.426
APP	687.93	729.178	600.223	854.716	581.034	712.103
C1S	898.471	562.47	937.039	501.24	690.601	710.109
PRNP	626.727	802.367	425.338	980.75	527.911	710.109
SKP1	646.312	780.681	524.656	840.229	660.719	706.454
PRDX1	669.569	807.788	617.496	693.913	717.162	705.789
HLA-DRB5	937.642	569.247	779.427	488.202	763.645	702.467
PRDX5	583.884	806.433	557.042	860.51	624.197	701.802
RHOA	741.79	612.618	766.472	601.198	909.734	698.479
PLP1	908.264	601.775	569.996	596.852	717.162	690.504
IFI27	755.255	584.156	937.039	537.457	624.197	678.209
LDHA	571.643	756.285	578.632	812.704	561.113	672.228
SH3BGRL3	541.041	731.889	634.768	793.872	634.158	669.57
AKAP12	570.419	722.401	470.679	832.986	667.359	662.259
FADS2	744.238	664.121	436.133	709.849	617.557	656.61
HLA-E	711.188	569.247	880.903	507.035	697.241	654.284
CD9	888.679	513.678	574.314	522.97	783.566	653.952
DPYSL2	574.091	666.832	516.019	798.218	647.438	646.641
TAGLN2	583.884	563.825	595.905	825.742	604.276	638.334
APLP2	572.867	706.137	567.837	711.297	561.113	635.343
C1QC	635.295	615.329	896.017	469.369	654.079	634.347
EEF1A2	417.41	948.745	373.52	754.757	501.35	626.704
ARHGDIA	558.178	573.313	578.632	708.4	664.039	610.089
MAP1A	412.513	856.581	326.021	767.795	594.315	607.763
GABARAP	632.847	529.942	658.518	567.879	727.123	606.102
TXN	440.667	898.597	414.543	657.696	511.31	605.769
COX6C	534.921	680.386	477.156	733.027	514.63	605.105
CSRP1	686.706	573.313	634.768	501.24	654.079	605.105
SRP14	576.54	632.948	595.905	656.248	511.31	605.105
DHCR24	570.419	623.461	384.316	819.948	454.867	600.453
MPZ	727.101	485.215	706.018	472.267	650.758	598.459
RABAC1	567.971	639.725	572.155	664.94	461.507	597.794
AP2M1	523.904	628.882	509.542	766.347	468.148	597.462
CD14	647.536	502.835	837.722	467.921	597.635	595.136
CHCHD2	517.784	674.964	485.792	688.119	507.99	589.487
DYNC1H1	446.788	746.798	358.407	809.807	418.345	587.161
PLTP	602.245	403.894	1278.17	308.567	567.754	586.829
PGAM1	454.132	763.062	442.611	689.567	484.749	585.167
NDRG4	359.878	849.804	241.817	844.575	471.468	584.17
ATP6V0B	489.63	660.055	528.974	675.081	504.67	581.512
S100A11	651.208	475.728	677.95	524.419	607.596	578.854
TUBB4B	445.564	849.804	384.316	649.004	401.744	577.525
TIMP1	652.432	447.265	908.971	379.552	567.754	570.546
APOC1	638.967	626.172	429.656	517.175	577.714	569.55
S100A13	520.232	528.586	442.611	733.027	610.916	568.22
UQCRQ	493.302	651.923	550.564	604.096	481.428	565.23
AHNAK2	385.584	826.763	356.248	685.221	441.586	563.568
TSC22D3	597.349	494.703	539.769	560.636	670.68	562.239
FASN	515.336	642.436	360.566	717.092	398.424	557.255
GPI	401.497	676.319	390.793	763.449	451.547	555.261
ANXA6	451.684	669.543	433.974	693.913	415.025	554.264
CALR	580.212	505.545	764.313	417.217	547.832	549.612
STAB1	654.88	383.564	930.562	415.768	388.463	549.28
GSTP1	538.593	527.231	643.405	518.624	544.512	547.95
STMN1	539.817	486.571	392.952	670.735	647.438	544.96
COX6A1	440.667	607.197	438.293	631.62	561.113	536.985
COX5B	449.236	638.37	574.314	536.008	461.507	535.988
ACOT7	399.049	669.543	334.657	717.092	451.547	533.662
EIF4A1	553.282	425.58	686.586	499.791	547.832	529.674
SARAF	446.788	603.131	410.225	660.594	434.946	527.348
ABCA8	668.345	433.712	509.542	431.704	574.394	522.696
PPDPF	599.797	454.042	485.792	533.111	507.99	522.032
ITGB4	705.068	395.762	606.7	391.141	484.749	520.038
TIMP3	566.747	470.306	578.632	480.959	507.99	519.373
PGK1	444.339	578.734	446.929	604.096	488.069	518.709
DDX5	621.83	418.803	524.656	525.867	444.906	517.38
MORF4L1	452.908	585.511	505.224	466.472	657.399	517.047
TLE5	501.871	528.586	544.087	543.252	428.305	517.047
DBI	550.834	531.297	479.315	479.51	494.709	513.06
HTRA1	490.854	679.03	373.52	488.202	434.946	512.727
GUK1	482.286	580.09	421.02	566.43	444.906	512.395
PRDX2	425.978	692.584	390.793	557.738	378.502	511.398
CD163	496.975	376.787	930.562	328.848	650.758	511.066
NGFR	472.493	585.511	453.406	575.122	371.862	510.734
EDF1	468.821	506.901	477.156	620.031	424.985	509.737
IGFBP4	520.232	417.448	911.13	295.529	581.034	509.737
LTBP4	738.118	340.193	632.609	367.962	438.266	509.405
VAT1	432.099	520.454	328.18	719.989	471.468	507.743
NACA	522.68	466.24	585.11	431.704	614.236	506.746
PCSK1N	385.584	567.891	263.407	825.742	328.699	506.746
DKK3	503.095	550.272	375.679	572.225	451.547	505.749
DYNLL2	418.634	628.882	306.589	635.966	444.906	505.417
DYNLL1	501.871	523.165	408.065	527.316	567.754	505.085
NDUFA13	515.336	487.926	518.178	486.753	534.552	504.42
TMA7	509.215	506.901	507.383	492.548	507.99	504.42
SELENOP	555.73	412.026	669.314	344.784	693.921	503.423
CHL1	619.382	357.812	433.974	518.624	614.236	503.091
SERINC1	425.978	538.074	367.043	593.955	617.557	502.094
BSCL2	368.447	643.791	295.793	682.324	415.025	501.43
CKB	503.095	613.973	403.747	476.613	428.305	501.43
SYT11	455.356	593.643	293.634	612.788	438.266	498.771
CD151	496.975	491.992	507.383	524.419	444.906	498.439
CANX	505.543	475.728	503.065	469.369	587.675	497.774
SELENOM	598.573	426.935	509.542	411.422	571.074	497.11
HLA-DPB1	609.59	439.133	552.724	336.092	614.236	496.777
GPX4	550.834	506.901	574.314	398.384	415.025	495.116
HSPG2	708.74	306.309	664.996	362.168	421.665	495.116
CLIC4	676.914	386.275	483.633	357.822	597.635	494.784
CIRBP	612.038	449.976	505.224	453.434	332.02	491.461
HNRNPA2B1	582.66	394.407	593.746	420.115	478.108	490.464
ID3	634.071	337.482	798.858	292.631	441.586	489.135
ATP5MD	446.788	527.231	382.157	586.712	444.906	488.47
COX7A2	461.477	548.917	410.225	546.149	401.744	488.47
MBP	528.801	399.828	546.246	447.639	600.956	488.47
EEF1D	569.195	410.671	695.223	331.746	491.389	487.473
PFDN5	501.871	436.423	639.087	424.461	471.468	486.144
LGALS3	621.83	383.564	589.428	337.54	534.552	484.483
RARRES2	625.503	412.026	511.701	428.807	348.621	482.821
LAPTM5	550.834	387.63	623.973	395.487	471.468	478.501
UQCR10	416.186	563.825	436.133	511.381	428.305	478.501
GTF2I	463.925	500.124	442.611	488.202	491.389	477.837
PLEC	569.195	425.58	500.906	396.936	498.029	476.84
RNASEK	454.132	527.231	377.838	525.867	454.867	476.84
GRINA	443.115	590.932	408.065	443.293	468.148	476.508
UBL5	452.908	482.504	496.588	505.586	411.704	474.846
GNB1	423.53	528.586	392.952	573.674	345.3	471.191
NDFIP1	378.239	527.231	347.611	612.788	424.985	468.533
TAC1	247.263	353.746	226.703	1012.62	474.788	468.533
MARCKS	516.56	426.935	481.474	378.103	617.557	467.536
HSP90B1	493.302	402.539	623.973	373.757	524.591	466.871
CD44	482.286	417.448	371.361	541.803	458.187	460.558
MAP1LC3A	365.999	519.099	360.566	631.62	335.34	460.558
QKI	547.162	336.127	479.315	391.141	644.118	458.896
TMEM176B	521.456	458.108	351.929	489.651	381.823	458.564
CLTC	374.567	542.14	358.407	528.765	471.468	458.231
MYL9	522.68	318.507	781.586	288.285	517.951	458.231
MZT2B	462.701	466.24	474.997	444.742	421.665	457.235
VWA1	652.432	340.193	483.633	347.681	421.665	456.902
PCBP2	445.564	471.662	453.406	398.384	577.714	455.573
RNASE1	411.289	303.598	991.016	281.042	517.951	454.909
GAP43	320.708	462.174	278.521	750.411	381.823	453.579
NDUFS5	406.393	543.495	375.679	467.921	441.586	452.915
HLA-DPA1	487.182	380.853	544.087	395.487	511.31	451.253
EIF4G2	425.978	422.869	449.088	508.483	458.187	450.921
COX6B1	455.356	535.363	338.975	478.061	338.66	450.589
CNN3	525.128	361.878	604.541	288.285	597.635	450.256
FOS	515.336	360.523	537.61	396.936	468.148	448.927
ANXA5	489.63	426.935	425.338	408.525	498.029	446.601
GPC1	663.449	319.863	464.201	323.054	418.345	445.937
VMP1	685.482	294.111	516.019	311.464	358.581	444.94
LGALS3BP	478.614	380.853	429.656	453.434	511.31	444.607
CEBPD	553.282	344.259	565.678	327.4	474.788	444.275
PPP2R1A	347.637	516.388	379.997	572.225	335.34	444.275
PRUNE2	297.45	680.386	196.476	563.533	365.222	443.611
RGCC	583.884	414.737	310.907	415.768	351.941	438.626
RHOC	533.697	361.878	511.701	381	388.463	438.626
NDUFA1	374.567	532.652	358.407	521.521	305.458	437.629
ATP1B1	313.363	664.121	218.067	537.457	318.739	436.632
FABP3	246.039	576.024	241.817	680.875	348.621	436.3
FABP7	472.493	573.313	192.158	399.833	454.867	435.636
SAT1	460.252	379.498	513.86	409.974	441.586	435.303
SQSTM1	498.199	429.646	457.724	366.514	388.463	433.974
MAPK3	370.895	490.637	293.634	566.43	375.182	433.642
UQCRB	348.862	504.19	414.543	441.845	491.389	432.645
EDIL3	428.426	473.017	215.908	553.392	398.424	432.313
GPM6B	525.128	361.878	388.634	341.886	617.557	431.316
FBXO2	320.708	639.725	263.407	515.727	282.217	430.983
ATP5F1A	401.497	532.652	347.611	446.191	348.621	430.319
S100A4	428.426	394.407	582.951	333.194	491.389	428.325
CDH19	544.714	341.548	373.52	379.552	514.63	427.661
MYL12B	372.119	432.357	390.793	511.381	411.704	425.667
REEP5	292.554	601.775	304.43	480.959	411.704	425.335
GHITM	336.621	542.14	293.634	512.829	378.502	425.002
HNRNPK	461.477	393.051	472.838	405.628	368.542	424.338
COPS9	400.273	458.108	377.838	479.51	341.98	423.341
SLC44A2	547.162	364.589	375.679	420.115	288.857	421.015
MAP4	412.513	421.514	347.611	498.343	375.182	420.682
NPC2	454.132	380.853	459.883	349.13	517.951	419.353
EZR	455.356	424.224	347.611	423.012	398.424	418.024
ATP5MF	348.862	547.561	328.18	456.331	315.419	415.698
FN1	610.814	275.136	531.133	246.274	441.586	415.698
HAMP	500.647	406.605	362.725	394.038	338.66	415.698
MTCH1	377.015	416.092	386.475	499.791	368.542	415.366
MT1E	585.108	332.061	477.156	266.555	401.744	415.033
PABPC1	347.637	338.837	516.019	294.08	903.093	414.701
BSG	438.219	436.423	440.452	341.886	421.665	414.369
VAT1L	253.384	542.14	179.203	651.902	355.261	414.369
POLR2L	375.791	371.366	451.247	478.061	415.025	413.704
PRIMA1	560.627	360.523	330.339	388.244	332.02	413.704
LDHB	361.102	504.19	341.134	415.768	431.626	412.707
CADM3	436.995	428.29	343.293	440.396	332.02	410.714
TPPP3	276.641	513.678	259.089	592.506	322.059	409.052
COL1A2	460.252	315.796	470.679	357.822	517.951	408.72
LAMP1	506.767	348.325	444.77	350.578	368.542	408.72
C4orf48	335.397	496.058	308.748	479.51	368.542	407.058
FLNA	481.062	318.507	606.7	282.491	398.424	406.726
GNB2	441.891	391.696	444.77	378.103	355.261	406.726
PEA15	340.293	387.63	328.18	588.16	338.66	406.726
BEX3	337.845	464.885	326.021	509.932	332.02	406.062
RHOQ	334.173	459.464	228.862	550.495	405.064	405.397
YWHAE	370.895	395.762	319.543	482.407	464.827	404.068
DSTN	286.434	463.53	373.52	486.753	421.665	402.739
TMBIM6	434.547	357.812	455.565	330.297	511.31	402.739
MGST3	346.413	527.231	302.271	454.883	282.217	402.406
HMGCS1	265.624	490.637	194.317	614.236	385.143	401.742
KIF1A	299.899	463.53	276.362	547.598	378.502	401.077
TALDO1	434.547	412.026	377.838	385.346	345.3	400.08
FDPS	323.156	439.133	265.566	562.084	345.3	399.748
GDI1	346.413	445.91	356.248	478.061	308.778	398.751
NDUFA11	410.065	386.275	377.838	420.115	381.823	398.751
P4HB	471.269	341.548	466.361	307.118	431.626	397.09
MAP1LC3B	292.554	535.363	278.521	488.202	312.098	396.757
PCP4	239.919	527.231	153.294	673.632	242.374	396.757
PLD3	408.841	406.605	343.293	450.537	285.537	395.428
YWHAQ	351.31	431.001	302.271	502.689	322.059	395.096
SUN2	436.995	357.812	410.225	367.962	408.384	394.764
HSPA5	430.875	382.209	451.247	338.989	365.222	394.431
CYB5R3	361.102	428.29	354.089	425.909	385.143	393.767
PLPP1	488.406	353.746	336.816	357.822	395.103	392.77
DDX17	477.389	310.375	464.201	344.784	351.941	391.441
ITGB8	609.59	245.318	414.543	250.62	444.906	391.441
ATP5MPL	318.26	467.596	317.384	454.883	368.542	391.108
CTNNA1	503.095	342.903	369.202	337.54	361.901	391.108
BEX1	254.608	477.083	189.999	649.004	249.015	389.115
IDS	328.052	413.382	252.612	520.073	401.744	388.782
COX8A	379.463	422.869	347.611	408.525	341.98	388.118
KIF5A	269.297	481.149	207.271	605.544	252.335	387.121
HSPA12A	356.206	493.347	308.748	386.795	322.059	386.124
KIF3C	280.313	497.413	220.226	543.252	295.497	386.124
SLC25A3	325.604	458.108	377.838	373.757	411.704	385.792
DST	396.6	372.721	239.657	431.704	504.67	385.459
SRRM2	537.369	272.425	390.793	356.373	308.778	385.459
ARPC1B	407.617	344.259	453.406	328.848	444.906	384.795
GNAI2	440.667	313.086	468.52	310.016	448.227	384.463
CSDE1	400.273	368.655	306.589	415.768	418.345	383.466
HNRNPA1	402.721	333.416	505.224	286.837	471.468	381.804
SNRPN	277.865	517.744	205.112	502.689	325.379	381.804
CRIP2	354.982	398.473	436.133	367.962	351.941	380.807
PSMD8	339.069	481.149	243.976	460.677	275.576	380.807
CNP	456.58	360.523	373.52	318.708	365.222	379.478
MICALL2	537.369	295.466	317.384	363.616	278.896	378.481
TSPO	407.617	327.995	472.838	310.016	431.626	378.149
RTL8C	315.812	414.737	265.566	501.24	345.3	377.817
AP2S1	325.604	433.712	319.543	428.807	348.621	377.152
NDUFB2	358.654	384.919	347.611	398.384	388.463	375.491
SAMHD1	429.651	355.102	351.929	288.285	514.63	375.491
ATP5IF1	257.056	555.693	239.657	450.537	285.537	374.826
EXTL1	498.199	309.02	336.816	354.924	278.896	372.168
FXYD1	498.199	303.598	392.952	282.491	365.222	371.503
SLC25A6	353.758	355.102	440.452	362.168	375.182	371.503
MAPK8IP1	266.848	402.539	321.702	517.175	318.739	371.171
DCTN2	296.226	409.316	297.953	470.818	361.901	370.839
MLLT11	250.935	413.382	179.203	630.172	282.217	369.842
NEDD8	335.397	380.853	323.861	444.742	328.699	369.177
VGF	241.143	365.944	177.044	649.004	345.3	365.854
S100A8	357.43	329.35	632.609	254.966	298.818	363.528
TECR	292.554	497.413	351.929	308.567	368.542	363.196
NCAM1	395.376	336.127	252.612	431.704	351.941	362.864
RHOB	373.343	302.243	505.224	343.335	295.497	361.534
CD24	250.935	452.687	123.067	575.122	305.458	360.537
NAA38	336.621	402.539	347.611	362.168	332.02	359.873
IFI27L2	395.376	355.102	360.566	328.848	322.059	357.547
H1FX	377.015	262.938	520.337	312.913	385.143	357.215
ATP6AP1	336.621	365.944	276.362	420.115	365.222	356.55
MXRA7	295.002	337.482	256.93	521.521	345.3	356.55
CLSTN1	350.086	401.183	289.316	386.795	292.177	355.885
LAMTOR4	375.791	357.812	397.27	344.784	258.975	355.885
TMEM258	405.169	321.218	369.202	327.4	351.941	355.885
PTMS	386.808	268.359	440.452	315.81	441.586	355.221
JUND	359.878	357.812	336.816	383.898	295.497	354.888
PCBP1	348.862	361.878	373.52	295.529	451.547	353.892
OST4	362.326	337.482	392.952	321.605	368.542	352.23
EIF4A2	309.691	359.168	291.475	414.32	395.103	351.566
YWHAB	266.848	414.737	287.157	382.449	448.227	350.901
RAB6B	274.193	451.331	181.362	486.753	258.975	350.569
ATF4	421.082	295.466	321.702	388.244	249.015	350.236
IFI6	377.015	272.425	453.406	295.529	434.946	350.236
NDUFA3	328.052	409.316	313.066	340.438	345.3	350.236
TSPAN3	315.812	401.183	293.634	370.86	358.581	350.236
INF2	413.738	314.441	334.657	338.989	308.778	349.572
AQP1	331.724	306.309	580.792	259.312	351.941	349.24
DYNLRB1	334.173	376.787	317.384	343.335	378.502	348.575
PARK7	356.206	344.259	330.339	353.476	328.699	345.917
L1CAM	400.273	296.822	183.521	478.061	262.296	345.584
NCDN	347.637	330.705	254.771	465.023	242.374	345.584
WBP2	297.45	387.63	256.93	415.768	341.98	344.92
SLC38A2	324.38	342.903	382.157	338.989	345.3	343.258
SOX10	473.717	248.029	354.089	288.285	312.098	341.264
CFH	351.31	197.881	744.881	155.008	468.148	340.932
GABARAPL2	306.019	371.366	228.862	475.164	225.773	340.932
SPOCK2	211.765	458.108	189.999	492.548	278.896	339.935
NPDC1	345.189	330.705	399.429	347.681	232.414	339.271
S100A9	318.26	257.516	664.996	194.122	405.064	336.945
SOD2	365.999	332.061	362.725	270.901	381.823	336.945
HLA-DQB1	435.771	249.384	416.702	223.095	405.064	335.283
SCRG1	343.965	346.97	241.817	379.552	322.059	334.951
TBCB	290.106	382.209	313.066	359.27	315.419	334.619
OLFM1	275.417	417.448	207.271	434.601	249.015	333.622
TUBA4A	228.902	506.901	209.43	394.038	239.054	332.957
CLIC1	332.949	348.325	356.248	321.605	278.896	332.293
EEF1B2	291.33	294.111	440.452	298.426	434.946	330.963
ARF1	329.276	357.812	321.702	307.118	328.699	329.967
FADS3	427.202	265.649	313.066	334.643	239.054	329.967
TAGLN	302.347	172.129	742.722	201.365	444.906	329.302
BCAP31	303.571	390.341	291.475	338.989	278.896	328.637
RAC1	302.347	326.639	345.452	318.708	398.424	328.305
CHCHD10	313.363	437.778	272.044	298.426	249.015	327.64
DDIT4	413.738	248.029	382.157	302.772	262.296	327.64
ARL6IP5	275.417	372.721	276.362	350.578	381.823	327.308
HSBP1	304.795	290.045	345.452	389.692	302.138	326.644
ATP6V0A1	263.176	383.564	269.885	401.282	272.256	326.311
ADD1	347.637	304.954	336.816	336.092	275.576	325.647
RNF187	293.778	374.076	233.18	354.924	355.261	324.318
DCTN1	246.039	398.473	263.407	383.898	308.778	323.985
SLC15A3	413.738	306.309	319.543	240.479	322.059	323.985
FIS1	303.571	336.127	334.657	324.502	322.059	322.988
ATP5F1D	297.45	382.209	287.157	336.092	268.936	322.656
ATP13A2	232.574	414.737	211.589	453.434	205.852	321.992
EPB41L3	192.18	437.778	196.476	473.715	235.734	321.992
STMN3	237.471	444.555	200.794	392.59	272.256	321.659
NDUFB1	298.674	345.614	313.066	327.4	322.059	321.327
DUSP1	336.621	257.516	399.429	289.734	378.502	320.33
NDUFB7	285.21	351.036	349.77	312.913	308.778	319.998
SFRP5	405.169	268.359	297.953	296.977	295.497	319.333
CAP1	310.915	340.193	297.953	320.156	318.739	319.001
ACADVL	351.31	310.375	358.407	291.183	252.335	318.669
ADH1B	340.293	201.947	507.383	224.544	464.827	318.004
VAMP2	275.417	291.4	259.089	447.639	292.177	318.004
GAS7	407.617	249.384	304.43	265.107	378.502	317.339
LRP1	378.239	239.897	440.452	253.517	298.818	317.339
HCFC1R1	309.691	348.325	272.044	328.848	298.818	316.675
TTYH1	381.912	309.02	224.544	321.605	288.857	316.675
TMED10	402.721	271.07	332.498	236.133	335.34	314.681
CAPZB	319.484	332.061	295.793	328.848	252.335	314.349
TUBB4A	214.213	378.143	189.999	466.472	272.256	314.349
PSMC5	264.4	344.259	300.112	365.065	268.936	313.02
FCER1G	351.31	268.359	455.565	240.479	262.296	312.687
NFE2L1	263.176	356.457	280.68	382.449	229.094	312.687
PHC2	423.53	237.186	354.089	236.133	308.778	312.687
SNX3	307.243	327.995	332.498	294.08	302.138	312.687
C9orf16	255.832	344.259	250.453	386.795	305.458	311.69
FKBP5	363.55	256.161	334.657	240.479	431.626	311.358
NPTX2	358.654	262.938	231.021	372.308	285.537	311.358
COX7B	233.798	418.803	267.725	307.118	332.02	311.026
TSPAN8	309.691	330.705	183.521	375.206	312.098	310.694
CLIP3	295.002	322.573	231.021	404.179	225.773	310.029
PSMD2	286.434	345.614	254.771	373.757	222.453	309.697
ATP6V0D1	228.902	403.894	202.953	362.168	335.34	309.032
COL18A1	347.637	246.674	414.543	252.069	325.379	309.032
INSIG1	173.819	388.985	142.499	486.753	322.059	308.368
PFKP	209.317	467.596	196.476	337.54	292.177	308.368
SARS	236.247	388.985	261.248	382.449	209.172	308.368
PTGES3	288.882	338.837	276.362	321.605	302.138	308.035
BTF3	325.604	296.822	356.248	256.415	325.379	307.371
MAP2K2	293.778	327.995	250.453	356.373	258.975	306.374
ATP5MG	280.313	334.771	323.861	299.875	288.857	305.709
ANK2	206.869	387.63	144.658	479.51	219.133	305.377
PLEKHB1	364.775	288.689	209.43	314.362	302.138	304.38
PCMT1	231.35	424.224	185.681	344.784	295.497	304.048
COMMD6	288.882	272.425	403.747	279.593	322.059	303.715
H3F3A	348.862	260.227	414.543	195.571	365.222	303.715
ROMO1	342.741	298.177	341.134	266.555	235.734	303.383
MRFAP1	282.761	322.573	254.771	307.118	375.182	303.051
GRN	282.761	256.161	474.997	221.647	381.823	301.722
TMEM176A	331.724	317.152	220.226	311.464	285.537	301.722
JUN	389.256	226.343	297.953	295.529	258.975	300.725
HMGB1	313.363	292.756	321.702	241.928	385.143	300.393
LMNA	388.032	237.186	317.384	231.787	345.3	300.06
ATP5MC3	244.815	387.63	239.657	281.042	368.542	299.728
ATP6V1E1	236.247	395.762	211.589	353.476	242.374	299.063
EGFL8	369.671	239.897	345.452	253.517	285.537	299.063
PINK1	228.902	351.036	254.771	376.654	252.335	299.063
ATOX1	296.226	288.689	265.566	365.065	219.133	297.734
MYH9	295.002	261.582	451.247	217.301	341.98	297.734
CAVIN1	308.467	248.029	371.361	240.479	405.064	297.402
TAPBP	334.173	261.582	330.339	278.145	275.576	297.07
HNRNPC	314.587	288.689	297.953	260.761	348.621	296.737
AATK	407.617	219.567	278.521	295.529	212.493	296.405
LAPTM4A	304.795	235.831	386.475	225.993	441.586	296.073
PFKL	328.052	260.227	386.475	265.107	229.094	296.073
PIN1	260.728	397.117	256.93	295.529	205.852	296.073
CCNI	257.056	298.177	222.385	340.438	401.744	295.408
FLOT1	277.865	309.02	269.885	325.951	275.576	295.076
COX5A	227.678	440.489	226.703	285.388	242.374	294.411
PSMB1	312.139	296.822	261.248	295.529	288.857	294.411
RAN	260.728	342.903	254.771	317.259	275.576	294.411
TSC22D4	292.554	330.705	289.316	253.517	312.098	294.411
FSTL1	314.587	215.501	354.089	292.631	335.34	293.414
SSR4	343.965	239.897	379.997	241.928	272.256	293.414
ANXA1	364.775	229.054	347.611	230.339	315.419	293.082
PSMB4	250.935	318.507	263.407	328.848	308.778	293.082
LAMTOR1	263.176	283.268	317.384	315.81	305.458	292.75
NAP1L1	253.384	268.359	269.885	298.426	481.428	292.75
REEP1	203.197	387.63	181.362	388.244	255.655	292.75
PRKAR1A	253.384	310.375	269.885	315.81	335.34	292.417
SNRNP70	369.671	254.806	326.021	260.761	192.571	292.085
SEPTIN7	271.745	334.771	209.43	308.567	325.379	291.421
ADGRG1	312.139	307.664	261.248	276.696	272.256	291.088
ADCYAP1	140.769	390.341	157.613	478.061	229.094	290.756
CDC37	295.002	292.756	278.521	302.772	265.616	290.756
SNRPD2	285.21	306.309	323.861	276.696	249.015	290.756
GABARAPL1	244.815	424.224	131.704	336.092	219.133	289.759
OGFRL1	331.724	280.557	252.612	273.799	288.857	289.427
ATP5MC2	302.347	285.979	295.793	289.734	249.015	289.095
CCDC92	198.3	352.391	200.794	424.461	205.852	289.095
ATP6V0E1	272.969	311.73	295.793	275.247	278.896	287.101
ZFAND5	298.674	260.227	272.044	295.529	325.379	287.101
PTPRN	203.197	346.97	129.545	459.229	209.172	286.436
CDC42	281.537	307.664	274.203	272.35	292.177	285.772
PHLDA3	309.691	237.186	306.589	295.529	285.537	285.772
TYROBP	335.397	252.095	379.997	217.301	245.695	285.772
DPYSL3	209.317	309.02	136.022	454.883	275.576	285.439
VCP	246.039	321.218	293.634	338.989	169.33	285.439
WSB1	399.049	222.277	246.135	256.415	258.975	285.439
ARL6IP4	326.828	262.938	310.907	259.312	242.374	284.775
KCTD12	353.758	249.384	300.112	183.981	385.143	284.11
NDUFV1	292.554	334.771	289.316	250.62	205.852	284.11
SORBS1	353.758	229.054	308.748	239.031	292.177	283.778
RPN2	321.932	261.582	289.316	246.274	302.138	282.781
TIMP4	342.741	283.268	177.044	275.247	292.177	282.116
ACLY	235.023	327.995	196.476	386.795	185.931	281.784
RAB7A	285.21	277.847	233.18	302.772	305.458	281.452
BST2	303.571	200.592	492.269	172.392	341.98	281.12
DAG1	357.43	219.567	295.793	224.544	325.379	280.455
DEPP1	337.845	211.435	390.793	192.673	318.739	279.79
PRXL2A	269.297	294.111	194.317	295.529	368.542	279.79
WARS	249.711	314.441	233.18	320.156	255.655	279.79
MAGED1	241.143	310.375	220.226	307.118	332.02	279.126
FCGRT	292.554	218.211	470.679	218.749	232.414	278.793
ATP5PF	264.4	281.913	261.248	283.939	312.098	277.464
TMEM233	187.284	284.623	136.022	480.959	255.655	277.464
TKT	221.558	321.218	259.089	320.156	249.015	277.132
VSIG4	274.193	265.649	379.997	223.095	278.896	277.132
CEND1	189.732	426.935	159.772	334.643	192.571	276.8
MFGE8	306.019	276.491	293.634	263.658	202.532	276.8
SERPINF1	286.434	187.038	554.883	170.943	285.537	276.8
RASSF4	336.621	241.252	272.044	272.35	212.493	276.135
PSMB3	243.591	292.756	272.044	262.209	355.261	275.471
COL6A1	367.223	216.856	323.861	212.955	229.094	274.474
TRIR	310.915	243.963	297.953	268.004	225.773	274.141
FABP5	281.537	303.598	222.385	285.388	222.453	272.812
DNM1	179.939	397.117	168.408	356.373	185.931	272.48
REEP2	217.885	360.523	142.499	336.092	258.975	272.48
NDUFB9	247.263	338.837	224.544	283.939	215.813	271.483
NUPR1	334.173	219.567	289.316	244.825	255.655	270.818
PLBD2	233.798	307.664	183.521	350.578	232.414	270.818
BLOC1S1	309.691	241.252	278.521	252.069	265.616	270.486
EIF3K	257.056	298.177	310.907	244.825	229.094	269.822
PSMB7	238.695	330.705	202.953	298.426	242.374	269.822
ATP6AP2	233.798	276.491	248.294	324.502	252.335	269.157
SLC22A17	308.467	275.136	261.248	227.441	255.655	269.157
WDR83OS	269.297	292.756	278.521	257.863	215.813	268.492
MVD	231.35	315.796	161.931	370.86	175.97	267.828
AHR	354.982	215.501	282.839	181.084	332.02	267.496
KIF21A	183.611	371.366	146.817	336.092	255.655	266.166
MICOS13	249.711	299.532	250.453	270.901	242.374	266.166
ARPC5	235.023	260.227	259.089	270.901	355.261	265.169
DCXR	315.812	230.409	302.271	237.582	219.133	265.169
EIF6	237.471	307.664	209.43	327.4	175.97	264.837
UQCRC1	250.935	290.045	222.385	296.977	232.414	264.837
ERBB3	348.862	234.475	241.817	195.571	302.138	264.505
PPA1	209.317	321.218	284.998	240.479	298.818	264.505
TGFBR2	304.795	188.394	377.838	192.673	332.02	264.505
POMP	235.023	302.243	218.067	302.772	232.414	264.173
UBE2D3	252.16	253.45	263.407	265.107	318.739	263.84
ITGAV	308.467	241.252	226.703	240.479	305.458	263.508
MT1X	265.624	302.243	287.157	192.673	288.857	263.508
STUB1	235.023	296.822	220.226	292.631	258.975	263.508
CYB5R1	175.043	319.863	185.681	376.654	222.453	263.176
CYBA	282.761	230.409	388.634	211.506	212.493	262.843
FKBP1A	237.471	273.781	272.044	281.042	249.015	262.843
PSMB5	208.093	318.507	224.544	299.875	249.015	262.843
ARL6IP1	241.143	311.73	179.203	282.491	282.217	262.511
NDUFC2	217.885	304.954	254.771	276.696	258.975	262.511
UQCRH	220.334	319.863	259.089	270.901	222.453	262.511
MAP7D1	222.782	315.796	224.544	285.388	239.054	261.847
SNAP25	144.441	451.331	146.817	286.837	235.734	261.847
FAIM2	187.284	361.878	189.999	328.848	169.33	261.182
TRAPPC5	263.176	269.715	237.498	265.107	262.296	261.182
HNRNPU	266.848	220.922	308.748	240.479	308.778	260.185
ITGB1	266.848	234.475	276.362	260.761	272.256	259.521
SERPINB6	306.019	195.17	291.475	268.004	222.453	259.521
TMEM59	246.039	262.938	248.294	260.761	298.818	259.188
ENDOD1	265.624	272.425	187.84	304.221	212.493	258.856
PPIB	298.674	197.881	343.293	204.263	292.177	258.524
ZFP36L1	320.708	215.501	313.066	182.533	282.217	258.191
ATF3	220.334	319.863	153.294	324.502	215.813	257.859
OS9	320.708	187.038	239.657	250.62	302.138	257.527
ECE1	348.862	210.079	250.453	220.198	219.133	257.194
ATP5PO	230.126	299.532	246.135	244.825	268.936	256.862
HDLBP	243.591	264.293	284.998	243.377	258.975	256.53
SCN7A	356.206	235.831	218.067	205.711	212.493	256.53
TLN1	279.089	237.186	293.634	225.993	252.335	256.198
C11orf96	211.765	222.277	371.361	272.35	239.054	255.533
DAD1	254.608	268.359	274.203	228.89	252.335	254.868
HNRNPH1	303.571	214.145	334.657	195.571	235.734	254.868
VPS28	248.487	242.608	272.044	262.209	258.975	254.868
ENTPD6	235.023	307.664	153.294	311.464	202.532	254.536
MDH1	200.748	398.473	146.817	243.377	235.734	254.204
PRDX6	260.728	239.897	291.475	240.479	245.695	254.204
TBCA	201.972	300.888	183.521	286.837	315.419	254.204
ARPC4	252.16	234.475	282.839	259.312	249.015	253.872
LTBP3	374.567	181.617	250.453	201.365	225.773	253.539
SEC61G	252.16	273.781	224.544	241.928	278.896	253.539
DNAJA1	189.732	304.954	209.43	299.875	255.655	252.875
HEBP2	176.267	372.721	138.181	324.502	175.97	252.542
SERINC3	188.508	310.375	213.749	296.977	242.374	252.542
SERPINA5	334.173	250.74	192.158	208.609	225.773	252.21
C12orf57	239.919	229.054	358.407	205.711	282.217	251.878
ACTR1A	214.213	280.557	181.362	324.502	219.133	251.213
CLTA	238.695	260.227	233.18	254.966	282.217	251.213
SYP	206.869	258.872	168.408	357.822	235.734	251.213
AKR1B1	217.885	261.582	261.248	253.517	292.177	250.881
NAPB	170.147	288.689	146.817	398.384	199.212	250.881
ATP6V1G1	203.197	310.375	194.317	260.761	295.497	250.549
BRI3	237.471	248.029	317.384	236.133	222.453	250.549
NDUFB10	227.678	291.4	261.248	243.377	209.172	250.216
TRMT112	271.745	249.384	239.657	228.89	255.655	249.884
RBX1	249.711	268.359	209.43	249.171	265.616	249.552
SMIM29	247.263	273.781	198.635	262.209	235.734	248.555
CYSTM1	227.678	269.715	151.135	299.875	282.217	248.223
HLA-DMA	314.587	185.683	310.907	186.879	265.616	248.223
CARHSP1	238.695	220.922	274.203	272.35	235.734	247.226
MATN2	330.5	212.79	192.158	208.609	278.896	247.226
NAPA	220.334	294.111	228.862	253.517	219.133	247.226
ARL2	277.865	220.922	254.771	236.133	239.054	246.893
NDUFB11	230.126	294.111	231.021	215.852	272.256	246.893
TMOD1	186.059	302.243	131.704	372.308	166.01	246.893
HK1	203.197	291.4	194.317	279.593	255.655	246.229
METRN	331.724	197.881	224.544	221.647	222.453	246.229
GDI2	231.35	241.252	248.294	247.723	288.857	245.897
PGRMC1	261.952	253.45	179.203	273.799	222.453	245.897
STXBP1	182.387	306.309	166.249	325.951	195.892	244.567
SAP18	215.437	276.491	252.612	233.236	255.655	244.235
SREBF1	314.587	193.815	256.93	195.571	268.936	244.235
CSF1R	261.952	230.409	297.953	207.16	229.094	243.903
ZFP36L2	287.658	208.724	287.157	169.494	312.098	243.57
MTRNR2L12	104.046	223.633	168.408	110.099	1089.02	243.238
PLAC9	237.471	284.623	259.089	189.776	242.374	241.909
SREBF2	232.574	239.897	213.749	286.837	212.493	241.909
CLTB	181.163	311.73	220.226	262.209	219.133	241.577
DAZAP2	270.521	222.277	276.362	191.225	272.256	241.577
NDUFB8	241.143	239.897	233.18	259.312	219.133	241.577
CUTA	232.574	256.161	241.817	237.582	235.734	241.244
TPM3	260.728	206.013	243.976	220.198	308.778	240.248
MAGED2	244.815	215.501	220.226	278.145	229.094	239.915
SNU13	222.782	245.318	226.703	270.901	222.453	239.915
TUFM	242.367	239.897	274.203	228.89	205.852	239.915
EIF5A	236.247	242.608	235.339	231.787	258.975	238.918
PAFAH1B1	189.732	267.004	177.044	317.259	209.172	237.921
MLF2	216.661	258.872	205.112	268.004	222.453	237.589
PITHD1	199.524	314.441	140.34	289.734	182.611	237.589
TCEAL4	225.23	237.186	233.18	262.209	222.453	237.589
ABCA2	313.363	182.972	243.976	215.852	202.532	237.257
CPE	182.387	346.97	133.863	257.863	219.133	236.26
VSIR	275.417	189.749	282.839	212.955	219.133	235.595
SRSF5	258.28	192.46	256.93	254.966	199.212	235.263
NENF	224.006	216.856	246.135	272.35	202.532	234.599
PDIA3	242.367	239.897	269.885	195.571	235.734	234.599
RCAN2	149.337	315.796	138.181	336.092	179.291	234.266
CALCB	148.113	239.897	129.545	430.255	162.69	233.934
NMB	148.113	267.004	183.521	344.784	209.172	233.934
UBA1	281.537	216.856	228.862	236.133	142.768	233.269
KRTCAP2	242.367	187.038	315.225	211.506	242.374	232.937
NUCB1	246.039	215.501	246.135	218.749	252.335	232.937
PTOV1	249.711	197.881	189.999	281.042	229.094	232.937
NR4A1	296.226	153.155	334.657	178.186	219.133	232.273
CTSA	255.832	262.938	200.794	227.441	149.409	231.94
FUS	261.952	203.302	248.294	224.544	212.493	231.94
HMGN2	276.641	206.013	293.634	181.084	195.892	231.94
TOMM5	153.009	265.649	200.794	317.259	215.813	231.94
TXNL4A	176.267	239.897	177.044	349.13	179.291	231.94
ARPP19	194.628	260.227	172.726	273.799	255.655	231.608
ATP6V0E2	188.508	284.623	168.408	291.183	179.291	231.608
PJA2	183.611	261.582	170.567	291.183	235.734	230.611
PSME1	270.521	189.749	276.362	195.571	232.414	230.611
SEC61A1	222.782	231.765	231.021	240.479	225.773	230.611
SRGN	211.765	215.501	364.884	155.008	285.537	230.611
STOM	252.16	187.038	317.384	175.289	272.256	230.611
GLG1	271.745	197.881	241.817	207.16	232.414	230.279
DDT	194.628	273.781	168.408	269.453	222.453	229.946
LAMB1	297.45	185.683	233.18	201.365	215.813	229.946
VDAC2	176.267	265.649	192.158	301.324	182.611	229.946
ZCCHC24	285.21	192.46	304.43	149.213	242.374	229.946
CDKN2D	153.009	309.02	112.272	318.708	212.493	228.95
MTURN	236.247	185.683	224.544	250.62	268.936	228.617
ZFP36	261.952	189.749	259.089	217.301	212.493	228.617
MT1M	303.571	166.708	304.43	156.456	215.813	227.62
MXRA8	255.832	182.972	291.475	186.879	255.655	227.62
TMBIM1	261.952	203.302	293.634	198.468	156.049	227.288
ABCA3	215.437	238.542	140.34	321.605	146.089	226.956
FDFT1	219.11	242.608	142.499	265.107	252.335	226.956
LSS	214.213	258.872	170.567	269.453	172.65	226.956
PSMA7	188.508	291.4	187.84	215.852	258.975	226.956
EPDR1	153.009	287.334	114.431	349.13	169.33	226.624
MID1IP1	228.902	243.963	172.726	221.647	272.256	226.624
RHBDD2	197.076	273.781	185.681	269.453	156.049	226.624
SCARB2	243.591	207.368	248.294	199.917	252.335	226.291
PCBP4	249.711	219.567	207.271	236.133	182.611	225.959
NGRN	189.732	262.938	140.34	299.875	192.571	225.627
ID1	227.678	127.403	516.019	126.034	239.054	225.294
RAB1A	217.885	219.567	235.339	250.62	185.931	225.294
ALDOA	160.354	307.664	164.09	304.221	109.566	224.962
C1orf122	197.076	237.186	183.521	279.593	209.172	224.962
CD47	215.437	214.145	200.794	247.723	262.296	224.962
COX17	203.197	219.567	179.203	305.67	182.611	224.962
DDX39B	272.969	158.576	272.044	207.16	225.773	224.962
C19orf53	230.126	249.384	185.681	214.403	232.414	224.63
CSNK1A1	214.213	230.409	231.021	215.852	249.015	224.63
FLOT2	220.334	215.501	220.226	246.274	215.813	224.63
MORF4L2	211.765	193.815	239.657	262.209	225.773	224.63
NOP53	220.334	189.749	382.157	143.418	265.616	224.63
SIGIRR	254.608	203.302	235.339	217.301	195.892	224.63
MCAM	189.732	261.582	250.453	241.928	146.089	224.298
NCL	227.678	187.038	239.657	201.365	335.34	224.298
PSMB6	219.11	223.633	224.544	233.236	219.133	224.298
MDH2	203.197	256.161	213.749	252.069	149.409	223.633
PYGB	198.3	288.689	166.249	249.171	162.69	223.633
ARPC3	235.023	211.435	202.953	231.787	232.414	223.301
CYP51A1	189.732	261.582	189.999	228.89	258.975	223.301
ZNHIT1	233.798	212.79	241.817	218.749	199.212	222.968
SH3GLB2	215.437	206.013	211.589	269.453	192.571	222.636
CCDC85B	194.628	279.202	241.817	189.776	202.532	222.304
TRAPPC1	194.628	226.343	215.908	249.171	235.734	222.304
TMEM259	255.832	197.881	250.453	215.852	152.729	221.307
CAVIN3	310.915	150.444	231.021	188.327	209.172	220.975
PSMC3	215.437	227.699	213.749	224.544	222.453	220.975
PTTG1IP	259.504	169.419	263.407	198.468	225.773	220.642
FKBP8	192.18	245.318	215.908	221.647	239.054	220.31
FEZ1	198.3	242.608	127.386	279.593	229.094	219.978
UQCRFS1	168.922	302.243	151.135	240.479	215.813	219.978
HSPA9	192.18	269.715	183.521	218.749	229.094	219.645
PUF60	232.574	210.079	235.339	236.133	142.768	219.313
WDR1	237.471	207.368	209.43	230.339	189.251	219.313
GABBR1	222.782	230.409	228.862	230.339	139.448	218.981
NDUFB4	224.006	235.831	196.476	210.057	215.813	218.649
RAB6A	198.3	257.516	164.09	221.647	255.655	218.649
ACHE	160.354	207.368	136.022	373.757	172.65	218.316
NCS1	187.284	227.699	138.181	324.502	159.369	218.316
UBE2M	208.093	220.922	215.908	247.723	175.97	218.316
WASHC1	265.624	192.46	243.976	207.16	139.448	218.316
HNRNPA3	261.952	180.262	241.817	182.533	232.414	217.652
XRCC6	186.059	239.897	252.612	224.544	175.97	217.319
IGFBP5	253.384	161.287	269.885	156.456	312.098	216.987
NDUFS7	227.678	246.674	202.953	191.225	195.892	216.987
TMEM30A	205.645	253.45	155.454	249.171	179.291	216.987
PLAAT3	282.761	182.972	263.407	157.905	182.611	216.655
NME3	263.176	159.931	254.771	230.339	136.128	216.322
SDCBP	181.163	249.384	220.226	191.225	282.217	216.322
PLXND1	222.782	187.038	313.066	179.635	195.892	215.326
MSMO1	194.628	245.318	131.704	262.209	215.813	214.993
LAMTOR5	215.437	257.516	198.635	199.917	166.01	214.661
USP5	166.474	243.963	174.885	268.004	202.532	213.664
B4GAT1	228.902	230.409	157.613	234.685	166.01	213.332
CSTB	217.885	222.277	209.43	186.879	245.695	213.332
HNRNPDL	233.798	178.906	239.657	208.609	212.493	213.332
MICOS10	195.852	245.318	170.567	243.377	179.291	213.332
CTNNB1	209.317	200.592	289.316	168.046	239.054	213
B4GALNT4	237.471	192.46	220.226	224.544	156.049	212.667
LHFPL6	216.661	174.84	332.498	124.586	312.098	212.667
LPIN1	182.387	230.409	131.704	282.491	212.493	212.335
TSC22D1	203.197	227.699	256.93	163.7	235.734	211.67
PFN2	176.267	262.938	142.499	237.582	215.813	210.341
BRK1	188.508	207.368	179.203	231.787	272.256	210.009
TPRG1L	146.889	287.334	174.885	223.095	212.493	209.677
RAB11A	171.371	215.501	196.476	272.35	172.65	209.344
SOD3	235.023	206.013	213.749	155.008	265.616	209.344
LRP10	241.143	172.129	254.771	176.738	209.172	208.347
SLC25A1	195.852	216.856	177.044	253.517	166.01	208.347
SLCO2B1	220.334	173.485	269.885	183.981	215.813	207.683
JPT1	137.096	269.715	142.499	285.388	166.01	207.351
MCRIP1	210.541	185.683	231.021	221.647	179.291	207.018
SYNGR1	204.421	219.567	174.885	249.171	136.128	207.018
LY6E	224.006	145.022	334.657	157.905	219.133	206.021
OPTN	204.421	208.724	133.863	239.031	239.054	206.021
DDX3X	230.126	174.84	246.135	192.673	182.611	205.689
FCGR3A	205.645	203.302	231.021	155.008	288.857	205.689
HADHA	201.972	210.079	220.226	207.16	179.291	205.689
RAB1B	193.404	206.013	224.544	220.198	175.97	205.689
RUFY3	146.889	276.491	120.908	281.042	146.089	205.357
VAMP1	148.113	352.391	110.113	198.468	162.69	205.357
BLVRB	195.852	223.633	252.612	178.186	172.65	205.025
F13A1	156.682	145.022	485.792	102.856	282.217	204.692
GNG2	220.334	176.195	159.772	227.441	249.015	204.692
CNBP	215.437	208.724	239.657	169.494	189.251	204.36
IGFBP6	170.147	170.774	330.339	141.97	328.699	204.36
SELENOT	155.458	219.567	170.567	270.901	199.212	204.36
DNAJB2	220.334	222.277	174.885	194.122	182.611	204.028
EGFL7	183.611	210.079	313.066	150.662	199.212	204.028
PSMD4	184.835	223.633	187.84	234.685	162.69	204.028
COTL1	205.645	211.435	211.589	163.7	255.655	203.363
YBX1	192.18	203.302	280.68	124.586	292.177	203.031
YPEL3	228.902	195.17	198.635	207.16	149.409	203.031
ADCY3	237.471	181.617	237.498	159.354	205.852	202.698
AP1S2	193.404	215.501	168.408	210.057	232.414	202.698
KIAA0930	237.471	195.17	179.203	218.749	126.167	202.698
GSTO1	177.491	204.658	265.566	175.289	229.094	202.366
SUMO2	209.317	180.262	205.112	172.392	298.818	202.034
TCF25	198.3	222.277	177.044	204.263	195.892	202.034
CCM2	148.113	256.161	140.34	263.658	162.69	201.369
ENG	186.059	150.444	425.338	114.445	222.453	201.369
KIFAP3	143.217	233.12	131.704	298.426	166.01	201.369
NUCKS1	208.093	187.038	196.476	166.597	302.138	201.037
PMP2	210.541	181.617	170.567	182.533	312.098	201.037
AIF1	219.11	189.749	211.589	157.905	258.975	200.705
C6orf62	204.421	191.104	192.158	188.327	255.655	200.705
FAM50A	198.3	188.394	228.862	188.327	222.453	200.705
PLEKHB2	178.715	204.658	170.567	240.479	205.852	200.705
POLR2E	175.043	268.359	161.931	191.225	185.931	200.705
TACC1	197.076	178.906	265.566	165.148	245.695	200.705
EIF3F	209.317	204.658	224.544	170.943	195.892	200.372
CALD1	217.885	151.799	274.203	147.764	275.576	200.04
SLC25A4	150.561	304.954	131.704	211.506	156.049	200.04
VKORC1	189.732	178.906	189.999	240.479	202.532	200.04
C1orf198	252.16	139.601	243.976	168.046	205.852	199.376
EID1	201.972	170.774	209.43	194.122	258.975	199.376
ITGB2	204.421	191.104	297.953	159.354	146.089	199.376
VDAC3	141.993	224.988	129.545	301.324	162.69	199.043
PAFAH1B2	199.524	196.526	196.476	186.879	232.414	198.711
TMEM219	201.972	188.394	207.271	217.301	159.369	198.711
IMPDH1	148.113	300.888	146.817	202.814	149.409	198.046
SMDT1	167.698	224.988	181.362	211.506	209.172	198.046
IDI1	156.682	235.831	140.34	239.031	209.172	197.714
MAPK8IP3	206.869	187.038	155.454	243.377	159.369	197.714
TMEFF2	118.735	224.988	92.8403	352.027	152.729	197.714
H2AFJ	241.143	151.799	272.044	140.521	205.852	197.382
METTL7A	220.334	173.485	205.112	157.905	272.256	197.382
ABHD2	170.147	257.516	142.499	204.263	189.251	197.05
COPE	187.284	223.633	189.999	211.506	136.128	197.05
FAM20C	211.765	176.195	196.476	205.711	189.251	197.05
JOSD2	195.852	177.551	192.158	217.301	209.172	197.05
PACS2	221.558	182.972	198.635	208.609	136.128	197.05
SSU72	189.732	212.79	218.067	159.354	232.414	197.05
TPP1	220.334	154.51	211.589	194.122	222.453	197.05
ARPC2	161.578	222.277	187.84	201.365	232.414	196.717
PET100	199.524	147.733	233.18	202.814	239.054	196.717
CYP1B1	172.595	154.51	319.543	110.099	371.862	196.385
NPM1	198.3	159.931	198.635	195.571	278.896	196.385
SYNGR3	146.889	220.922	99.3175	299.875	182.611	196.385
USF2	217.885	170.774	198.635	191.225	205.852	196.053
EMC10	197.076	203.302	177.044	217.301	149.409	195.388
NDUFA2	190.956	216.856	187.84	185.43	189.251	195.388
PPP1CA	216.661	206.013	211.589	157.905	172.65	195.388
CD99L2	186.059	230.409	144.658	205.711	185.931	195.056
ACTN4	201.972	178.906	196.476	179.635	245.695	194.723
ACTR2	183.611	177.551	207.271	182.533	275.576	194.723
TNFRSF1A	237.471	128.758	295.793	139.072	212.493	194.723
MAPRE2	160.354	226.343	138.181	208.609	262.296	194.391
PRX	228.902	142.312	291.475	123.137	242.374	194.391
IFNGR2	215.437	155.865	194.317	183.981	252.335	194.059
STAT2	247.263	147.733	226.703	166.597	175.97	194.059
CAPN2	188.508	211.435	172.726	191.225	202.532	193.727
ATP1A2	210.541	219.567	155.454	172.392	189.251	193.394
ATP2B4	197.076	150.444	136.022	282.491	172.65	193.394
VAPA	171.371	215.501	183.521	179.635	245.695	193.394
KLF2	173.819	146.378	399.429	111.548	229.094	193.062
NDUFS8	177.491	189.749	209.43	197.019	205.852	192.73
PSMB2	190.956	214.145	155.454	199.917	182.611	192.397
RHEB	182.387	219.567	144.658	215.852	172.65	192.397
TYMP	239.919	155.865	304.43	123.137	139.448	192.397
TMX4	155.458	199.236	129.545	268.004	195.892	192.065
FGFBP2	238.695	151.799	293.634	130.38	146.089	191.733
GATM	230.126	155.865	181.362	152.11	282.217	191.733
GPR155	209.317	159.931	181.362	185.43	252.335	191.733
NDUFAB1	172.595	237.186	142.499	212.955	159.369	191.733
NDUFS6	176.267	169.419	192.158	211.506	242.374	191.733
PSMC1	157.906	206.013	198.635	217.301	179.291	191.733
CCT7	159.13	181.617	220.226	221.647	189.251	191.401
CNTN2	188.508	214.145	144.658	224.544	136.128	191.068
SCAND1	193.404	191.104	205.112	175.289	199.212	191.068
EIF4B	172.595	193.815	241.817	150.662	245.695	190.736
PRMT2	183.611	187.038	172.726	179.635	272.256	190.736
CDS2	159.13	193.815	146.817	273.799	142.768	190.404
FSTL3	265.624	157.221	198.635	140.521	169.33	190.404
SLC3A2	217.885	139.601	233.18	173.84	212.493	190.404
ECHS1	182.387	207.368	187.84	199.917	149.409	190.071
EIF1B	137.096	283.268	123.067	214.403	152.729	190.071
PLEKHA4	232.574	173.485	215.908	107.202	265.616	190.071
RBM3	208.093	173.485	172.726	208.609	166.01	190.071
NISCH	210.541	178.906	198.635	186.879	152.729	189.739
AKR1C1	161.578	174.84	146.817	281.042	156.049	189.407
FBLN5	217.885	191.104	177.044	156.456	202.532	189.407
ISLR	247.263	169.419	211.589	126.034	189.251	189.074
KLF6	188.508	185.683	187.84	182.533	215.813	189.074
SF1	219.11	155.865	226.703	157.905	202.532	189.074
TMED9	215.437	192.46	213.749	156.456	146.089	189.074
NDUFV2	173.819	229.054	198.635	176.738	142.768	188.742
ZYX	175.043	178.906	243.976	159.354	232.414	188.742
BASP1	90.5816	253.45	94.9994	263.658	265.616	188.41
ITPK1	226.454	153.155	159.772	195.571	199.212	188.41
ST13	172.595	188.394	194.317	192.673	212.493	188.41
VDAC1	149.337	218.211	138.181	220.198	222.453	188.078
ANAPC16	224.006	173.485	211.589	140.521	195.892	187.745
FAM189B	150.561	234.475	146.817	237.582	119.527	187.413
AEBP1	203.197	119.271	373.52	102.856	215.813	187.081
APBB1	184.835	208.724	157.613	197.019	162.69	187.081
ACO2	182.387	214.145	144.658	197.019	172.65	186.748
EPHX1	173.819	191.104	172.726	195.571	212.493	186.748
POLR2F	211.765	173.485	185.681	179.635	169.33	186.748
PTEN	205.645	176.195	189.999	147.764	245.695	186.748
ATP6V1F	175.043	193.815	155.454	201.365	212.493	186.416
COL8A1	249.711	177.551	166.249	134.726	185.931	186.416
EIF4H	189.732	158.576	209.43	172.392	242.374	186.416
PI4KA	172.595	210.079	194.317	194.122	136.128	186.416
AURKAIP1	198.3	187.038	148.976	208.609	156.049	186.084
JUNB	212.989	147.733	330.339	112.996	152.729	186.084
NCOA7	134.648	204.658	157.613	249.171	179.291	186.084
SCOC	138.321	241.252	92.8403	231.787	215.813	185.752
TIMM13	197.076	168.063	205.112	181.084	179.291	185.752
PDIA6	193.404	176.195	246.135	141.97	192.571	185.419
RNH1	214.213	168.063	198.635	172.392	159.369	185.419
SDHA	155.458	264.293	170.567	179.635	109.566	185.419
JTB	188.508	172.129	233.18	169.494	169.33	185.087
MAF	243.591	135.535	218.067	114.445	255.655	184.755
SEM1	171.371	181.617	189.999	212.955	156.049	184.755
ATP1B2	217.885	224.988	116.59	165.148	142.768	184.422
GSTK1	203.197	155.865	170.567	194.122	202.532	184.422
PPP2CA	166.474	210.079	168.408	181.084	199.212	184.09
PRKAR1B	129.752	241.252	92.8403	270.901	132.808	184.09
LSM7	220.334	172.129	159.772	169.494	182.611	183.758
ATP1A3	119.959	256.161	112.272	237.582	162.69	183.426
CEBPB	198.3	128.758	276.362	150.662	209.172	183.426
GADD45GIP1	175.043	197.881	172.726	205.711	136.128	183.426
ATP5MC1	177.491	204.658	166.249	170.943	199.212	183.093
PTPA	192.18	193.815	168.408	199.917	116.207	183.093
ATP9A	139.545	214.145	101.477	259.312	172.65	182.761
ANAPC11	204.421	157.221	211.589	182.533	132.808	181.764
ARF3	164.026	187.038	155.454	217.301	175.97	181.764
PPP1CB	201.972	195.17	166.249	155.008	175.97	181.432
FGF13	130.976	196.526	90.6812	291.183	166.01	181.099
HLA-DMB	215.437	150.444	233.18	144.867	166.01	181.099
ANO5	105.271	264.293	79.8858	272.35	122.847	180.435
AIF1L	197.076	199.236	177.044	136.175	192.571	180.103
COL4A2	214.213	116.56	313.066	124.586	166.01	180.103
NBL1	166.474	161.287	155.454	249.171	142.768	180.103
SMTN	231.35	139.601	202.953	153.559	166.01	180.103
TPM4	204.421	135.535	228.862	160.802	192.571	180.103
ARL8A	149.337	203.302	138.181	215.852	185.931	179.77
GAA	189.732	161.287	220.226	173.84	149.409	179.77
GFRA1	151.785	214.145	110.113	231.787	159.369	179.77
SULT4A1	119.959	249.384	86.3631	256.415	139.448	179.77
CPLX2	118.735	268.359	97.1584	231.787	132.808	179.438
GAS6	183.611	206.013	224.544	128.932	149.409	179.438
ITGA7	182.387	180.262	151.135	220.198	119.527	179.438
NIBAN2	210.541	134.18	254.771	131.829	199.212	179.438
ASAH1	183.611	170.774	151.135	185.43	215.813	179.106
ELOVL5	149.337	191.104	142.499	224.544	179.291	178.773
SEC11C	164.026	211.435	125.226	192.673	189.251	178.773
AP1S1	129.752	189.749	127.386	272.35	142.768	178.109
NR2F2	209.317	135.535	237.498	124.586	229.094	178.109
EIF4G1	192.18	168.063	196.476	173.84	142.768	177.777
OTUB1	170.147	212.79	148.976	172.392	166.01	177.444
SHISA5	208.093	150.444	196.476	160.802	169.33	177.444
AP2A2	198.3	162.642	166.249	181.084	162.69	177.112
MCL1	200.748	136.89	207.271	168.046	185.931	177.112
EMP3	181.163	172.129	252.612	105.753	222.453	176.78
ETFB	184.835	188.394	196.476	153.559	149.409	176.78
KIF5C	132.2	238.542	84.204	231.787	162.69	176.78
NCOR2	178.715	170.774	172.726	186.879	169.33	176.78
RPN1	170.147	178.906	177.044	166.597	212.493	176.78
TAX1BP3	190.956	143.667	209.43	150.662	229.094	176.78
CCSER2	113.839	214.145	129.545	231.787	199.212	176.447
DYNC1LI2	160.354	172.129	170.567	197.019	189.251	176.115
HM13	170.147	161.287	233.18	169.494	156.049	176.115
MSN	188.508	130.114	202.953	188.327	185.931	176.115
NDUFA6	146.889	208.724	153.294	197.019	159.369	175.783
MAT2A	193.404	155.865	198.635	172.392	142.768	175.118
ATP6V1B2	122.408	241.252	84.204	233.236	159.369	174.786
NSF	118.735	214.145	112.272	230.339	199.212	174.786
USP22	194.628	151.799	170.567	195.571	136.128	174.786
AP1B1	171.371	188.394	155.454	178.186	169.33	174.454
CBR1	178.715	180.262	170.567	176.738	149.409	174.454
FXYD7	80.789	332.061	110.113	183.981	119.527	174.454
RNASET2	209.317	172.129	172.726	144.867	156.049	174.454
TOMM6	148.113	177.551	164.09	199.917	195.892	174.454
FBXW5	172.595	177.551	161.931	186.879	159.369	174.121
KIF1B	155.458	226.343	94.9994	192.673	175.97	174.121
NDUFA10	173.819	214.145	140.34	175.289	126.167	174.121
PSMA1	159.13	176.195	172.726	183.981	189.251	174.121
TOMM20	167.698	178.906	153.294	172.392	215.813	174.121
CDIPT	161.578	192.46	157.613	186.879	156.049	173.789
HSPA1A	190.956	197.881	144.658	136.175	199.212	173.789
STEAP3	122.408	238.542	155.454	199.917	122.847	173.789
UBXN6	172.595	187.038	174.885	179.635	129.488	173.789
ZEB2	193.404	147.733	168.408	127.483	298.818	173.789
AUP1	199.524	165.353	205.112	150.662	126.167	173.457
CADM4	233.798	135.535	194.317	115.894	199.212	173.124
ITGB1BP1	175.043	177.551	148.976	192.673	149.409	173.124
NUMA1	188.508	143.667	246.135	149.213	146.089	173.124
COL4A1	197.076	108.428	254.771	141.97	209.172	172.792
EPB41L2	217.885	128.758	168.408	141.97	235.734	172.792
RRAS	203.197	130.114	237.498	150.662	146.089	172.792
APMAP	156.682	211.435	157.613	169.494	149.409	172.46
CDK2AP2	214.213	145.022	153.294	160.802	182.611	172.46
COMT	203.197	139.601	215.908	136.175	185.931	172.46
DCTN3	157.906	196.526	148.976	199.917	126.167	172.46
EIF5	176.267	158.576	140.34	170.943	249.015	172.46
MTPN	137.096	201.947	129.545	191.225	219.133	172.46
SERPINE2	186.059	181.617	133.863	144.867	235.734	172.46
MPRIP	214.213	143.667	194.317	139.072	169.33	172.128
PTPRF	200.748	151.799	138.181	188.327	159.369	172.128
SEC61B	194.628	151.799	194.317	146.316	185.931	172.128
PDLIM4	249.711	130.114	172.726	127.483	162.69	171.795
C4orf3	181.163	180.262	222.385	112.996	179.291	171.463
MVP	197.076	139.601	246.135	139.072	139.448	171.463
RALY	182.387	165.353	183.521	175.289	129.488	171.463
ATXN10	124.856	206.013	125.226	215.852	179.291	171.131
SUMO3	172.595	170.774	151.135	192.673	149.409	171.131
TMEM123	203.197	145.022	207.271	107.202	239.054	171.131
POLR2I	179.939	140.956	198.635	162.251	192.571	170.466
RNF130	192.18	158.576	183.521	140.521	189.251	170.466
ADI1	189.732	181.617	151.135	162.251	136.128	170.134
ANXA11	181.163	130.114	194.317	175.289	189.251	170.134
B3GAT3	186.059	196.526	148.976	160.802	116.207	170.134
PLLP	236.247	146.378	166.249	123.137	162.69	170.134
OCIAD1	151.785	187.038	153.294	208.609	112.887	169.802
CYBRD1	199.524	146.378	187.84	114.445	242.374	169.469
NR2F1	254.608	112.494	161.931	108.65	229.094	169.469
SLC1A4	172.595	173.485	120.908	212.955	119.527	168.805
TMEM59L	122.408	254.806	107.954	182.533	146.089	168.805
ALDH2	135.872	215.501	157.613	172.392	149.409	168.472
NFIC	157.906	174.84	166.249	111.548	315.419	168.472
NPTN	130.976	180.262	144.658	215.852	166.01	168.14
PHLDB1	203.197	132.824	226.703	146.316	119.527	168.14
PPP2CB	166.474	177.551	172.726	163.7	152.729	168.14
PHPT1	179.939	158.576	172.726	169.494	146.089	167.808
TAGLN3	116.287	243.963	112.272	204.263	122.847	167.808
GJA1	195.852	159.931	142.499	136.175	215.813	167.143
PRPF8	171.371	153.155	187.84	163.7	166.01	167.143
LITAF	212.989	135.535	170.567	140.521	172.65	166.811
NDUFB6	170.147	173.485	129.545	169.494	192.571	166.811
APOL2	139.545	197.881	144.658	198.468	122.847	166.479
EIF3B	172.595	159.931	181.362	165.148	146.089	166.479
EPB41L1	126.08	211.435	92.8403	234.685	122.847	166.479
MOAP1	117.511	173.485	114.431	260.761	146.089	166.479
SFPQ	192.18	107.073	209.43	150.662	212.493	166.479
SYT4	117.511	184.328	116.59	253.517	132.808	166.479
DPP7	219.11	132.824	172.726	139.072	156.049	166.146
NAP1L4	143.217	177.551	170.567	179.635	162.69	166.146
EHBP1	186.059	149.088	159.772	155.008	185.931	165.814
GANAB	182.387	145.022	202.953	157.905	132.808	165.814
LAMB2	227.678	111.139	218.067	112.996	172.65	165.814
EVL	170.147	150.444	170.567	182.533	142.768	165.482
GADD45B	184.835	143.667	239.657	131.829	129.488	165.482
RAP1GDS1	134.648	189.749	118.749	215.852	146.089	165.482
IL6ST	161.578	170.774	187.84	144.867	172.65	165.149
SORT1	176.267	143.667	170.567	169.494	169.33	165.149
SRPX	203.197	127.403	209.43	133.278	159.369	165.149
PLXNB2	190.956	128.758	256.93	127.483	126.167	164.817
SELENOH	155.458	159.931	189.999	172.392	146.089	164.817
ABHD12	157.906	181.617	155.454	178.186	122.847	164.485
COX14	150.561	181.617	166.249	186.879	106.246	164.485
MS4A6A	187.284	132.824	231.021	108.65	205.852	164.485
PPP1R12C	188.508	151.799	198.635	147.764	116.207	164.485
TMOD2	211.765	154.51	146.817	128.932	169.33	164.485
GRB2	165.25	187.038	155.454	144.867	162.69	164.153
NRBP2	186.059	150.444	140.34	179.635	139.448	164.153
RDX	170.147	161.287	172.726	118.791	245.695	164.153
DYNLT3	127.304	226.343	82.0449	205.711	139.448	163.82
FKBP1B	124.856	161.287	110.113	269.453	116.207	163.82
GPX2	88.1334	355.102	86.3631	133.278	89.6453	163.82
SDF4	149.337	161.287	205.112	149.213	179.291	163.82
TOM1L2	171.371	189.749	144.658	159.354	119.527	163.82
CIAO2B	178.715	170.774	157.613	162.251	116.207	163.488
LENG8	215.437	108.428	179.203	169.494	119.527	163.488
MX1	149.337	174.84	127.386	191.225	166.01	163.488
CSNK1D	159.13	155.865	187.84	169.494	139.448	163.156
CSNK2B	165.25	161.287	151.135	165.148	175.97	163.156
CTSF	171.371	150.444	148.976	181.084	149.409	162.823
DDX24	140.769	174.84	110.113	197.019	195.892	162.823
HSPD1	165.25	147.733	177.044	156.456	185.931	162.823
PTPRA	187.284	151.799	125.226	182.533	132.808	162.491
QSOX1	164.026	165.353	146.817	172.392	152.729	162.491
AP2B1	146.889	192.46	114.431	192.673	132.808	162.159
EPN1	182.387	149.088	133.863	181.084	139.448	162.159
LPAR1	203.197	146.378	138.181	133.278	192.571	162.159
REX1BD	161.578	163.997	164.09	170.943	136.128	162.159
SEPTIN2	184.835	143.667	183.521	121.688	202.532	161.826
ANXA7	177.491	154.51	144.658	157.905	169.33	161.494
RNF181	145.665	173.485	174.885	175.289	122.847	161.494
MAPRE3	111.391	224.988	99.3175	207.16	129.488	161.162
NDUFB3	118.735	238.542	116.59	183.981	102.926	161.162
NFKBIA	208.093	105.717	192.158	140.521	169.33	161.162
NNMT	183.611	107.073	306.589	82.5742	189.251	161.162
SUB1	139.545	173.485	161.931	153.559	205.852	161.162
NACAD	118.735	197.881	92.8403	227.441	136.128	160.83
ISCU	145.665	191.104	148.976	144.867	179.291	160.497
MDK	231.35	109.783	202.953	107.202	149.409	160.497
HIGD1A	123.632	201.947	103.636	202.814	146.089	160.165
KCNAB2	108.943	212.79	114.431	214.403	116.207	160.165
NDUFS2	161.578	189.749	136.022	146.316	152.729	160.165
OGA	181.163	173.485	166.249	137.624	112.887	160.165
RAB5B	151.785	136.89	164.09	205.711	129.488	160.165
CCNL2	173.819	119.271	200.794	183.981	102.926	159.833
CTTN	206.869	163.997	146.817	137.624	92.9655	159.833
MBNL2	190.956	136.89	153.294	153.559	156.049	159.833
RBM39	182.387	113.849	185.681	156.456	179.291	159.833
S100A1	187.284	163.997	146.817	139.072	142.768	159.833
RNPS1	137.096	150.444	144.658	201.365	169.33	159.5
SURF4	177.491	135.535	181.362	152.11	152.729	159.5
ASPH	157.906	176.195	155.454	153.559	139.448	159.168
NOP10	155.458	170.774	183.521	131.829	166.01	159.168
SET	155.458	142.312	202.953	126.034	219.133	159.168
SPCS2	204.421	138.246	151.135	146.316	129.488	159.168
ATP5PD	134.648	173.485	153.294	162.251	189.251	158.836
CCND3	162.802	150.444	168.408	162.251	146.089	158.836
DBNL	164.026	169.419	148.976	152.11	149.409	158.836
DDB1	156.682	181.617	157.613	156.456	116.207	158.836
MYO1C	198.3	126.048	215.908	115.894	142.768	158.836
CPLX1	133.424	261.582	92.8403	149.213	96.2857	158.504
ERP29	153.009	178.906	127.386	179.635	122.847	158.504
LIMS2	195.852	104.362	202.953	141.97	159.369	158.504
RUNDC3A	108.943	206.013	84.204	220.198	149.409	158.504
GPAA1	176.267	128.758	174.885	149.213	172.65	157.839
LARP1	129.752	172.129	129.545	183.981	182.611	157.839
PKD1	186.059	140.956	129.545	168.046	142.768	157.839
TMED2	149.337	143.667	174.885	139.072	232.414	157.839
QDPR	119.959	151.799	107.954	253.517	129.488	157.507
ACTR10	130.976	188.394	94.9994	214.403	116.207	157.174
WFS1	155.458	191.104	114.431	168.046	119.527	157.174
HUWE1	145.665	153.155	157.613	166.597	172.65	156.842
LSM4	143.217	184.328	138.181	163.7	139.448	156.842
UBE2L3	149.337	195.17	153.294	140.521	126.167	156.842
VGLL4	205.645	131.469	127.386	163.7	116.207	156.842
ILK	161.578	149.088	200.794	128.932	156.049	156.51
SON	148.113	135.535	174.885	144.867	229.094	156.51
EIF3G	179.939	142.312	207.271	114.445	142.768	156.178
HSD17B12	134.648	168.063	125.226	170.943	199.212	156.178
JAK1	112.615	197.881	140.34	181.084	139.448	156.178
NDUFAF3	138.321	159.931	159.772	175.289	146.089	156.178
RETREG2	132.2	181.617	133.863	189.776	116.207	156.178
HSPE1	157.906	182.972	159.772	127.483	142.768	155.845
TSPAN7	105.271	184.328	116.59	218.749	139.448	155.845
COL6A2	159.13	109.783	284.998	102.856	179.291	155.513
LRPAP1	193.404	135.535	174.885	121.688	149.409	155.513
PICALM	170.147	146.378	146.817	160.802	139.448	155.513
PRKCSH	168.922	135.535	189.999	146.316	136.128	155.513
EIF3I	155.458	163.997	138.181	140.521	192.571	155.181
ERBB2	203.197	112.494	179.203	121.688	169.33	155.181
PDXK	128.528	166.708	194.317	143.418	166.01	155.181
RNF11	138.321	178.906	114.431	168.046	175.97	155.181
SF3B5	146.889	136.89	207.271	147.764	159.369	155.181
C20orf27	134.648	131.469	142.499	234.685	99.6059	154.516
CHPF	170.147	173.485	112.272	166.597	102.926	154.516
MAPK8IP2	117.511	218.211	99.3175	183.981	116.207	154.516
NDUFC1	156.682	147.733	164.09	139.072	185.931	154.516
SPOCK1	106.495	203.302	84.204	227.441	106.246	154.516
COL5A3	230.126	111.139	177.044	118.791	99.6059	154.184
GBA	155.458	151.799	181.362	153.559	116.207	154.184
HABP4	126.08	184.328	110.113	189.776	142.768	154.184
OAZ2	110.167	154.51	148.976	218.749	132.808	154.184
TOLLIP	127.304	173.485	116.59	202.814	126.167	154.184
TPGS2	108.943	177.551	105.795	201.365	185.931	154.184
ATP5PB	117.511	176.195	157.613	163.7	169.33	153.851
MAN2A2	190.956	138.246	144.658	126.034	169.33	153.851
NCKAP1	133.424	187.038	125.226	169.494	136.128	153.851
NUDT3	151.785	154.51	146.817	147.764	182.611	153.851
OAT	139.545	208.724	92.8403	155.008	149.409	153.851
PDK4	183.611	121.981	168.408	126.034	192.571	153.851
EMC4	127.304	169.419	159.772	159.354	162.69	153.519
ALCAM	123.632	170.774	97.1584	194.122	182.611	153.187
CCT5	129.752	155.865	187.84	156.456	149.409	153.187
IFI16	177.491	115.205	181.362	115.894	222.453	153.187
RHBDF1	239.919	112.494	140.34	114.445	126.167	153.187
BTG1	177.491	134.18	166.249	105.753	219.133	152.855
NDN	122.408	173.485	107.954	192.673	162.69	152.855
PSMD3	144.441	162.642	133.863	176.738	126.167	152.855
BAD	154.234	154.51	146.817	168.046	116.207	152.522
C11orf58	167.698	132.824	133.863	144.867	205.852	152.522
CTNNAL1	194.628	130.114	161.931	105.753	185.931	152.522
CYC1	140.769	184.328	127.386	144.867	162.69	152.522
PON2	208.093	135.535	133.863	126.034	132.808	152.522
SRSF3	161.578	162.642	181.362	112.996	149.409	152.522
TGOLN2	170.147	119.271	170.567	140.521	185.931	152.522
TM9SF2	186.059	120.626	140.34	150.662	162.69	152.522
WDR13	157.906	149.088	207.271	128.932	116.207	152.522
PSMF1	171.371	147.733	136.022	141.97	159.369	152.19
RNF7	137.096	165.353	146.817	186.879	89.6453	152.19
RTF2	162.802	154.51	159.772	133.278	149.409	152.19
PSMD13	149.337	149.088	144.658	170.943	132.808	151.858
RAB5C	148.113	127.403	205.112	155.008	132.808	151.858
H2AFZ	149.337	150.444	164.09	143.418	159.369	151.525
KCNMB4	188.508	128.758	166.249	120.24	156.049	151.525
YIPF3	145.665	154.51	157.613	176.738	92.9655	151.525
ADAR	159.13	121.981	194.317	157.905	119.527	151.193
CTBP1	161.578	130.114	123.067	185.43	139.448	151.193
CYB5R2	242.367	116.56	181.362	89.8176	83.0049	151.193
PSMA6	129.752	145.022	148.976	191.225	136.128	151.193
SLC44A1	195.852	107.073	181.362	121.688	159.369	151.193
SLC66A2	130.976	182.972	140.34	159.354	126.167	151.193
ABHD17A	154.234	150.444	159.772	134.726	166.01	150.861
EDNRB	160.354	153.155	148.976	140.521	146.089	150.861
HNRNPA0	165.25	135.535	181.362	112.996	189.251	150.861
LANCL1	112.615	201.947	101.477	176.738	146.089	150.861
SNCA	144.441	143.667	123.067	172.392	179.291	150.861
SSR1	151.785	147.733	177.044	123.137	179.291	150.861
ATL1	105.271	216.856	79.8858	179.635	152.729	150.529
HPCAL1	132.2	155.865	94.9994	215.852	122.847	150.529
KDELR2	177.491	119.271	205.112	110.099	162.69	150.529
PACSIN2	155.458	163.997	127.386	166.597	102.926	150.529
PRSS23	178.715	112.494	168.408	115.894	219.133	150.529
SF3B1	177.491	109.783	185.681	118.791	195.892	150.529
CAPN1	144.441	145.022	166.249	159.354	132.808	150.196
NHP2	141.993	149.088	153.294	170.943	122.847	150.196
PCBP3	108.943	193.815	88.5221	205.711	122.847	150.196
APRT	145.665	132.824	177.044	140.521	179.291	149.532
BAG6	155.458	140.956	161.931	149.213	136.128	149.532
PDAP1	144.441	147.733	166.249	139.072	166.01	149.532
PFKM	108.943	185.683	133.863	169.494	146.089	149.199
RAB2A	141.993	142.312	144.658	157.905	172.65	149.199
SRSF2	164.026	131.469	164.09	141.97	146.089	149.199
MGAT1	154.234	97.5852	209.43	150.662	162.69	148.867
NELFE	141.993	142.312	179.203	128.932	182.611	148.867
CDK2AP1	145.665	138.246	157.613	149.213	166.01	148.535
GALNT2	195.852	109.783	200.794	121.688	96.2857	148.535
NME1	153.009	200.592	92.8403	140.521	112.887	148.535
TPD52L2	140.769	162.642	136.022	160.802	126.167	148.535
WSB2	123.632	138.246	123.067	217.301	122.847	148.535
YPEL5	134.648	172.129	123.067	156.456	149.409	148.535
BIN1	188.508	128.758	125.226	152.11	112.887	148.202
BRD2	164.026	145.022	155.454	144.867	109.566	148.202
PRAF2	126.08	170.774	146.817	162.251	122.847	148.202
CAPZA2	126.08	154.51	159.772	147.764	172.65	147.87
TPD52	95.4779	180.262	97.1584	208.609	149.409	147.87
CCT4	118.735	151.799	142.499	172.392	166.01	147.538
CD164	149.337	147.733	144.658	126.034	195.892	147.538
FXYD5	135.872	124.692	222.385	131.829	156.049	147.538
KRT10	155.458	130.114	153.294	153.559	146.089	147.538
PRMT1	165.25	116.56	183.521	159.354	92.9655	147.538
SYNGR2	154.234	120.626	194.317	130.38	162.69	147.538
VPS35	112.615	187.038	97.1584	160.802	192.571	147.538
MYL12A	143.217	126.048	222.385	120.24	156.049	147.206
WIPF1	188.508	96.2298	159.772	126.034	189.251	147.206
BAG1	113.839	149.088	116.59	198.468	159.369	146.873
BNIP3	102.822	224.988	75.5677	163.7	146.089	146.873
IRS2	157.906	139.601	131.704	124.586	209.172	146.873
STARD7	141.993	150.444	142.499	146.316	159.369	146.873
YIF1B	132.2	158.576	140.34	169.494	116.207	146.873
ACSS2	137.096	168.063	107.954	168.046	129.488	146.541
FADS1	164.026	134.18	127.386	153.559	142.768	146.541
HNRNPD	154.234	128.758	148.976	146.316	166.01	146.541
SCP2	145.665	151.799	166.249	127.483	149.409	146.541
TTL	116.287	188.394	88.5221	199.917	92.9655	146.541
UBALD2	188.508	103.007	172.726	118.791	162.69	146.541
COPS6	128.528	151.799	155.454	153.559	149.409	146.209
DDX6	138.321	140.956	153.294	152.11	156.049	146.209
KTN1	115.063	140.956	136.022	149.213	252.335	146.209
SOX2	214.213	111.139	105.795	104.304	205.852	146.209
GPM6A	166.474	94.8745	146.817	133.278	242.374	145.876
NTRK1	97.926	117.915	103.636	285.388	89.6453	145.876
SERBP1	139.545	120.626	192.158	104.304	249.015	145.876
CTDSP1	186.059	94.8745	228.862	84.0229	172.65	145.544
DUSP3	124.856	161.287	92.8403	198.468	119.527	145.212
PLEKHM2	162.802	135.535	166.249	140.521	99.6059	145.212
SSR2	160.354	153.155	146.817	110.099	162.69	145.212
TNS1	134.648	162.642	155.454	115.894	182.611	145.212
HP1BP3	171.371	128.758	142.499	123.137	166.01	144.88
WDR6	156.682	120.626	187.84	128.932	142.768	144.88
AP3D1	108.943	158.576	144.658	186.879	109.566	144.547
ARHGEF17	137.096	154.51	170.567	144.867	99.6059	144.547
DNER	69.7723	257.516	82.0449	170.943	102.926	144.215
GNG5	170.147	115.205	192.158	105.753	159.369	144.215
ESYT1	139.545	176.195	94.9994	163.7	106.246	143.883
HLA-DQA1	177.491	131.469	159.772	94.1636	169.33	143.55
PAQR8	161.578	151.799	103.636	139.072	146.089	143.55
TRIM28	199.524	104.362	151.135	111.548	149.409	143.55
ARRB1	121.183	161.287	99.3175	191.225	116.207	143.218
C1orf43	151.785	149.088	133.863	127.483	156.049	143.218
CHP1	116.287	155.865	110.113	172.392	169.33	143.218
EHD2	140.769	111.139	248.294	124.586	109.566	143.218
EPAS1	134.648	113.849	272.044	88.3689	166.01	143.218
SH3BGRL	153.009	155.865	142.499	108.65	166.01	143.218
TMEM230	134.648	158.576	120.908	134.726	182.611	143.218
CARD19	149.337	147.733	90.6812	176.738	116.207	142.886
POLD4	148.113	127.403	161.931	131.829	162.69	142.886
ADIPOR2	155.458	115.205	131.704	160.802	149.409	142.554
EIF3H	124.856	119.271	183.521	136.175	199.212	142.554
MFSD10	178.715	113.849	151.135	139.072	109.566	142.554
SPCS3	139.545	151.799	136.022	157.905	102.926	142.554
TM9SF3	145.665	135.535	142.499	139.072	159.369	142.554
TXNL1	111.391	174.84	92.8403	188.327	119.527	142.554
WASF2	186.059	113.849	168.408	95.6123	162.69	142.554
CHD4	160.354	126.048	157.613	114.445	172.65	142.221
HNRNPM	145.665	100.296	157.613	147.764	199.212	142.221
PPFIBP1	177.491	115.205	133.863	133.278	146.089	142.221
PTP4A2	119.959	136.89	168.408	130.38	202.532	142.221
SNX17	175.043	136.89	142.499	117.342	122.847	142.221
ARL8B	113.839	170.774	107.954	165.148	146.089	141.889
CERS2	165.25	134.18	161.931	115.894	126.167	141.889
KLF9	159.13	115.205	170.567	114.445	179.291	141.889
MYDGF	165.25	124.692	166.249	127.483	116.207	141.889
PCBD1	111.391	127.403	146.817	197.019	126.167	141.889
CALCOCO2	155.458	104.362	144.658	139.072	195.892	141.557
CAPN5	121.183	130.114	131.704	198.468	109.566	141.557
CDK5RAP3	181.163	126.048	177.044	131.829	39.8424	141.557
MAP7D2	86.9094	233.12	94.9994	144.867	129.488	141.557
PDZD2	164.026	127.403	118.749	137.624	159.369	141.557
PHB	126.08	158.576	168.408	128.932	129.488	141.557
SEPTIN9	164.026	115.205	155.454	123.137	166.01	141.557
APOC2	155.458	158.576	94.9994	153.559	102.926	141.224
ARHGEF10	188.508	115.205	116.59	134.726	129.488	141.224
GIT1	137.096	145.022	148.976	146.316	119.527	141.224
LMAN2	144.441	109.783	192.158	140.521	132.808	141.224
CALY	90.5816	187.038	97.1584	192.673	112.887	140.892
H2AFV	157.906	135.535	131.704	95.6123	225.773	140.892
PSME2	188.508	108.428	194.317	105.753	89.6453	140.892
ENTPD2	177.491	121.981	133.863	118.791	146.089	140.56
LAMTOR2	150.561	159.931	155.454	123.137	83.0049	140.56
PHB2	148.113	134.18	155.454	123.137	152.729	140.56
SSR3	154.234	120.626	153.294	117.342	185.931	140.56
UBE2D2	127.304	151.799	120.908	146.316	166.01	140.56
LAMA4	170.147	107.073	125.226	144.867	152.729	140.227
NINJ1	144.441	127.403	133.863	141.97	166.01	140.227
PSMA4	111.391	153.155	183.521	139.072	122.847	140.227
SLIRP	161.578	153.155	99.3175	136.175	122.847	140.227
SORBS3	190.956	78.6103	196.476	112.996	129.488	140.227
UPK3BL1	179.939	116.56	144.658	126.034	116.207	140.227
XRCC5	161.578	128.758	142.499	107.202	182.611	140.227
FUNDC2	150.561	169.419	131.704	104.304	132.808	139.895
IFI30	165.25	117.915	215.908	94.1636	112.887	139.895
LYNX1	101.598	154.51	94.9994	198.468	142.768	139.895
PLOD1	154.234	109.783	192.158	108.65	166.01	139.895
RNF213	159.13	121.981	196.476	112.996	106.246	139.895
SELENOF	128.528	98.9405	172.726	134.726	232.414	139.895
SYNM	153.009	135.535	112.272	149.213	136.128	139.895
CTDSP2	162.802	119.271	198.635	101.407	122.847	139.563
EWSR1	151.785	120.626	155.454	114.445	182.611	139.231
SF3B2	149.337	113.849	157.613	153.559	112.887	139.231
UQCRC2	123.632	168.063	101.477	153.559	136.128	139.231
ARGLU1	182.387	108.428	142.499	124.586	122.847	138.898
ILF3	156.682	109.783	148.976	141.97	139.448	138.898
PPT1	138.321	140.956	133.863	118.791	189.251	138.898
STX12	121.183	161.287	107.954	160.802	129.488	138.898
ATP1B3	132.2	124.692	202.953	114.445	146.089	138.566
CTSZ	134.648	132.824	170.567	147.764	92.9655	138.566
DGKH	117.511	115.205	58.2951	241.928	139.448	138.566
GPS1	130.976	158.576	136.022	136.175	119.527	138.566
NID1	167.698	101.651	157.613	99.9583	209.172	138.566
PAIP2	140.769	151.799	123.067	143.418	112.887	138.566
SCD5	134.648	180.262	79.8858	156.456	96.2857	138.566
GRAMD1B	154.234	174.84	82.0449	134.726	99.6059	138.234
ICMT	99.1501	153.155	99.3175	195.571	136.128	138.234
SRP9	141.993	131.469	127.386	128.932	182.611	138.234
GLS	99.1501	178.906	94.9994	176.738	119.527	137.901
PCNP	144.441	139.601	120.908	123.137	175.97	137.901
PNKD	160.354	140.956	140.34	130.38	83.0049	137.901
STK25	137.096	132.824	144.658	159.354	92.9655	137.901
CAST	122.408	132.824	131.704	134.726	205.852	137.569
DHRS7	145.665	127.403	159.772	117.342	152.729	137.569
EMP1	154.234	101.651	211.589	101.407	149.409	137.569
NUDC	159.13	126.048	131.704	136.175	119.527	137.569
FBLN2	182.387	92.1638	189.999	94.1636	142.768	137.237
ISG15	135.872	104.362	254.771	82.5742	166.01	137.237
ITFG1	124.856	151.799	90.6812	172.392	126.167	137.237
PAXX	153.009	109.783	168.408	131.829	126.167	137.237
PTBP1	181.163	108.428	185.681	107.202	83.0049	137.237
SELENOK	135.872	143.667	131.704	127.483	156.049	137.237
SH3BP2	164.026	94.8745	198.635	120.24	112.887	137.237
SSBP4	155.458	94.8745	218.067	115.894	116.207	137.237
STIP1	124.856	131.469	116.59	160.802	162.69	137.237
USP11	141.993	131.469	123.067	157.905	112.887	137.237
ALKBH7	135.872	145.022	127.386	133.278	142.768	136.905
CUEDC2	137.096	142.312	127.386	133.278	146.089	136.905
MZT2A	126.08	159.931	99.3175	153.559	129.488	136.905
BCAM	111.391	149.088	114.431	157.905	159.369	136.572
GASK1B	160.354	105.717	164.09	121.688	139.448	136.572
IRF2BP2	170.147	111.139	146.817	123.137	122.847	136.572
ANK3	146.889	134.18	105.795	146.316	136.128	136.24
ARHGDIG	97.926	146.378	92.8403	217.301	96.2857	136.24
CCT3	129.752	124.692	123.067	165.148	136.128	136.24
H1F0	175.043	111.139	133.863	114.445	146.089	136.24
TMEM256	153.009	135.535	140.34	134.726	89.6453	136.24
ADD3	145.665	113.849	131.704	111.548	225.773	135.908
PDIA4	167.698	82.6763	224.544	84.0229	162.69	135.908
SLC2A3	111.391	146.378	110.113	172.392	132.808	135.908
ALOX5AP	130.976	127.403	177.044	107.202	169.33	135.575
NAGK	129.752	124.692	161.931	134.726	139.448	135.575
SHISA4	126.08	145.022	92.8403	156.456	156.049	135.575
TPM2	151.785	94.8745	237.498	97.0609	122.847	135.575
ARHGDIB	128.528	138.246	181.362	89.8176	179.291	135.243
G3BP2	100.374	145.022	110.113	179.635	142.768	135.243
RRBP1	157.906	109.783	170.567	111.548	136.128	135.243
RTRAF	138.321	120.626	131.704	137.624	162.69	135.243
SLC38A10	151.785	120.626	179.203	107.202	122.847	135.243
AZIN1	119.959	154.51	103.636	137.624	169.33	134.911
CPNE6	89.3575	241.252	69.0904	130.38	109.566	134.911
DDR1	184.835	97.5852	144.658	124.586	99.6059	134.911
GNAO1	68.5482	159.931	77.7268	234.685	112.887	134.911
SPCS1	156.682	147.733	127.386	101.407	132.808	134.911
SRM	122.408	117.915	181.362	144.867	116.207	134.911
MGP	112.615	116.56	246.135	94.1636	159.369	134.579
NUDT4	110.167	134.18	120.908	170.943	139.448	134.579
PNPLA6	150.561	120.626	103.636	166.597	99.6059	134.579
CLPTM1	135.872	131.469	138.181	143.418	109.566	134.246
METTL26	150.561	109.783	170.567	120.24	126.167	134.246
PABPN1	164.026	107.073	133.863	137.624	112.887	134.246
SGK1	124.856	132.824	153.294	136.175	129.488	134.246
TAF10	133.424	112.494	170.567	131.829	139.448	134.246
TMEM248	122.408	126.048	138.181	152.11	139.448	134.246
CAMLG	99.1501	166.708	94.9994	165.148	136.128	133.914
IDH3B	135.872	149.088	116.59	139.072	106.246	133.914
CMPK1	108.943	155.865	114.431	147.764	142.768	133.582
GRHPR	148.113	162.642	114.431	104.304	119.527	133.582
HRAS	88.1334	174.84	103.636	182.533	89.6453	133.582
CDKN1A	123.632	126.048	192.158	120.24	116.207	133.249
COX7A1	118.735	112.494	183.521	114.445	189.251	133.249
MBNL1	137.096	127.403	103.636	133.278	182.611	133.249
MLEC	161.578	124.692	118.749	111.548	149.409	133.249
NAT8L	111.391	204.658	75.5677	126.034	122.847	133.249
PSMC4	132.2	138.246	99.3175	147.764	142.768	133.249
SNX10	85.6853	166.708	84.204	192.673	119.527	133.249
TMEM120A	144.441	140.956	136.022	126.034	96.2857	133.249
CCT6A	111.391	143.667	146.817	134.726	139.448	132.917
DHCR7	113.839	131.469	90.6812	191.225	119.527	132.917
DLGAP4	143.217	131.469	125.226	144.867	92.9655	132.917
NAA10	159.13	111.139	127.386	124.586	142.768	132.917
PIGT	143.217	121.981	155.454	127.483	109.566	132.917
CHMP5	115.063	134.18	159.772	124.586	152.729	132.585
EGLN2	127.304	134.18	148.976	139.072	102.926	132.585
FOXD3	170.147	93.5191	155.454	104.304	156.049	132.585
ACTR3	108.943	153.155	77.7268	157.905	169.33	132.252
CLCN7	168.922	138.246	107.954	121.688	79.6847	132.252
EHBP1L1	151.785	100.296	198.635	99.9583	129.488	132.252
FAM219B	141.993	135.535	94.9994	160.802	89.6453	132.252
PDCD5	122.408	149.088	112.272	155.008	96.2857	132.252
AKAP6	97.926	182.972	88.5221	153.559	116.207	131.92
ARFGAP2	140.769	117.915	123.067	141.97	132.808	131.92
MAN2C1	165.25	97.5852	172.726	128.932	69.7241	131.92
MXD4	139.545	107.073	144.658	137.624	139.448	131.92
PDGFRB	150.561	105.717	194.317	102.856	116.207	131.92
PER1	177.491	90.8084	174.885	98.5096	119.527	131.92
UBQLN1	108.943	168.063	101.477	141.97	129.488	131.92
ACAT2	111.391	139.601	69.0904	207.16	89.6453	131.588
ELOC	102.822	166.708	125.226	134.726	126.167	131.588
GADD45A	77.1168	153.155	82.0449	210.057	122.847	131.588
TBX2	168.922	105.717	161.931	98.5096	122.847	131.588
ABLIM1	118.735	132.824	120.908	152.11	129.488	131.256
CNTN1	105.271	166.708	94.9994	149.213	129.488	131.256
MARCH2	143.217	131.469	133.863	128.932	99.6059	131.256
MMP28	183.611	85.387	129.545	128.932	109.566	131.256
PRELP	104.046	84.0317	310.907	65.1902	195.892	131.256
PRRC2B	138.321	115.205	144.658	133.278	126.167	131.256
ARHGEF40	159.13	117.915	146.817	115.894	96.2857	130.923
CTSL	130.976	92.1638	170.567	141.97	139.448	130.923
ERGIC3	140.769	132.824	146.817	126.034	86.3251	130.923
RTKN	183.611	111.139	107.954	127.483	79.6847	130.923
SLC16A3	112.615	165.353	123.067	131.829	106.246	130.923
SNRPG	160.354	116.56	168.408	92.7149	116.207	130.923
CIC	151.785	108.428	138.181	120.24	139.448	130.591
PREPL	108.943	146.378	99.3175	162.251	126.167	130.591
RANGAP1	123.632	146.378	120.908	143.418	96.2857	130.591
SCCPDH	135.872	119.271	101.477	130.38	189.251	130.591
SND1	149.337	113.849	159.772	118.791	102.926	130.591
SPHK1	198.3	98.9405	155.454	92.7149	73.0443	130.591
TCP1	116.287	169.419	79.8858	136.175	139.448	130.591
TERF2IP	106.495	139.601	110.113	153.559	152.729	130.591
TNS2	145.665	105.717	196.476	108.65	99.6059	130.591
VPS29	127.304	132.824	103.636	150.662	129.488	130.591
AXL	148.113	105.717	159.772	104.304	156.049	130.259
HSPB6	101.598	208.724	144.658	63.7415	146.089	130.259
IMPDH2	126.08	109.783	172.726	102.856	189.251	130.259
LMBRD1	155.458	131.469	140.34	101.407	109.566	130.259
POLR2A	119.959	135.535	146.817	133.278	112.887	130.259
RAD23B	113.839	134.18	116.59	137.624	169.33	130.259
AARS	121.183	140.956	144.658	127.483	109.566	129.926
AHSA1	127.304	149.088	114.431	131.829	109.566	129.926
MAZ	115.063	136.89	166.249	130.38	96.2857	129.926
MTLN	133.424	159.931	133.863	94.1636	122.847	129.926
AP1M1	110.167	157.221	97.1584	146.316	126.167	129.594
CCL3	165.25	113.849	92.8403	143.418	96.2857	129.594
ARPC1A	134.648	124.692	120.908	133.278	129.488	129.262
MAPK1	116.287	121.981	118.749	139.072	175.97	129.262
YBX3	137.096	90.8084	209.43	81.1256	189.251	129.262
CYB5A	133.424	128.758	123.067	111.548	166.01	128.93
PGM2L1	101.598	120.626	82.0449	204.263	122.847	128.93
VEGFB	139.545	142.312	140.34	98.5096	119.527	128.93
CAB39	107.719	157.221	92.8403	144.867	132.808	128.597
HCLS1	122.408	119.271	185.681	97.0609	152.729	128.597
SAP30BP	140.769	121.981	131.704	130.38	102.926	128.597
TMEM165	140.769	135.535	110.113	123.137	119.527	128.597
AFAP1L2	172.595	94.8745	127.386	105.753	142.768	128.265
CTDNEP1	145.665	121.981	138.181	110.099	122.847	128.265
CYFIP2	116.287	123.337	88.5221	181.084	112.887	128.265
TIMM8B	140.769	126.048	107.954	137.624	109.566	128.265
CD68	145.665	104.362	192.158	86.9202	132.808	127.933
CENPX	140.769	123.337	129.545	127.483	102.926	127.933
CORO1A	144.441	100.296	164.09	114.445	126.167	127.933
NDUFA12	132.2	136.89	142.499	120.24	89.6453	127.933
CTSC	144.441	105.717	196.476	69.5362	162.69	127.6
RAB10	129.752	119.271	125.226	126.034	149.409	127.6
TNS3	181.163	105.717	133.863	88.3689	116.207	127.6
ATL3	110.167	134.18	123.067	141.97	129.488	127.268
C7	113.839	82.6763	274.203	66.6389	185.931	127.268
IL13RA1	123.632	104.362	142.499	139.072	142.768	127.268
POLR2G	153.009	105.717	127.386	133.278	96.2857	127.268
RTN2	118.735	154.51	86.3631	152.11	89.6453	127.268
VPS51	117.511	146.378	146.817	117.342	99.6059	127.268
AOPEP	157.906	92.1638	136.022	115.894	139.448	126.936
PNPLA2	150.561	120.626	140.34	118.791	76.3645	126.936
ARL3	121.183	154.51	90.6812	130.38	119.527	126.603
EMP2	128.528	123.337	133.863	123.137	126.167	126.603
KPNB1	123.632	111.139	127.386	134.726	152.729	126.603
PGP	90.5816	159.931	88.5221	172.392	96.2857	126.603
SPRYD3	118.735	145.022	112.272	123.137	132.808	126.603
BZW1	140.769	115.205	129.545	111.548	142.768	126.271
CHMP2A	134.648	115.205	131.704	110.099	159.369	126.271
CTSH	132.2	82.6763	235.339	92.7149	126.167	126.271
CYFIP1	151.785	101.651	129.545	108.65	152.729	126.271
FAAP20	155.458	103.007	138.181	118.791	102.926	126.271
G6PC3	121.183	151.799	103.636	121.688	122.847	126.271
HERPUD1	112.615	131.469	148.976	121.688	126.167	126.271
RAD23A	117.511	113.849	153.294	115.894	162.69	126.271
SAR1A	130.976	124.692	118.749	124.586	132.808	126.271
SCAMP3	141.993	104.362	123.067	146.316	96.2857	126.271
BCL6	140.769	107.073	148.976	105.753	142.768	125.939
ERI3	101.598	127.403	144.658	141.97	122.847	125.939
LDLR	135.872	127.403	88.5221	143.418	112.887	125.939
APC2	127.304	140.956	69.0904	157.905	96.2857	125.607
CCDC124	118.735	126.048	166.249	120.24	92.9655	125.607
CNPY2	138.321	117.915	120.908	123.137	122.847	125.607
CPNE3	110.167	131.469	99.3175	137.624	166.01	125.607
GLO1	121.183	131.469	110.113	126.034	146.089	125.607
NDUFAF8	128.528	132.824	101.477	128.932	129.488	125.607
PRELID1	133.424	131.469	136.022	105.753	119.527	125.607
SUSD2	78.3408	234.475	101.477	84.0229	119.527	125.607
GAL	66.1001	105.717	60.4541	272.35	96.2857	125.274
HNRNPH3	145.665	103.007	138.181	107.202	146.089	125.274
INTS11	154.234	105.717	133.863	115.894	102.926	125.274
LIPA	129.752	135.535	127.386	102.856	136.128	125.274
PSMC6	105.271	163.997	99.3175	111.548	156.049	125.274
RAP1B	132.2	113.849	140.34	112.996	139.448	125.274
RGL1	124.856	123.337	123.067	131.829	119.527	125.274
SERP1	144.441	104.362	129.545	115.894	139.448	125.274
SHC2	110.167	138.246	84.204	168.046	99.6059	125.274
CADPS	85.6853	157.221	62.6132	191.225	96.2857	124.942
KIF3A	90.5816	174.84	69.0904	146.316	132.808	124.942
MTDH	134.648	115.205	140.34	104.304	146.089	124.942
PLEKHO1	128.528	119.271	131.704	126.034	116.207	124.942
TAF7	118.735	128.758	127.386	107.202	169.33	124.942
CAMTA1	108.943	136.89	90.6812	152.11	126.167	124.61
CBX6	139.545	101.651	140.34	110.099	149.409	124.61
VAMP5	159.13	89.4531	179.203	81.1256	132.808	124.61
MFSD12	156.682	103.007	129.545	112.996	106.246	124.277
NONO	133.424	113.849	153.294	79.6769	182.611	124.277
RAB3A	83.2371	227.699	62.6132	111.548	106.246	124.277
ZMIZ1	135.872	107.073	125.226	115.894	152.729	124.277
ADRM1	106.495	136.89	131.704	127.483	119.527	123.945
MAP3K11	156.682	96.2298	159.772	105.753	89.6453	123.945
SGCB	168.922	94.8745	110.113	110.099	126.167	123.945
ATRAID	130.976	101.651	125.226	112.996	179.291	123.613
CDC42SE1	141.993	98.9405	177.044	102.856	99.6059	123.613
CIB1	117.511	113.849	146.817	131.829	109.566	123.613
COLGALT1	139.545	93.5191	172.726	110.099	109.566	123.613
COPA	121.183	154.51	88.5221	115.894	126.167	123.613
ELAVL4	74.6686	138.246	45.3406	214.403	132.808	123.613
ITGA6	157.906	88.0977	155.454	69.5362	192.571	123.613
SRSF11	139.545	103.007	131.704	107.202	156.049	123.613
TRIM36	83.2371	177.551	69.0904	156.456	109.566	123.613
ABTB1	127.304	119.271	136.022	120.24	109.566	123.281
AGT	105.271	142.312	161.931	95.6123	129.488	123.281
CYHR1	141.993	121.981	172.726	94.1636	66.4039	123.281
HMGCR	91.8057	123.337	82.0449	185.43	129.488	123.281
LASP1	139.545	93.5191	127.386	121.688	149.409	123.281
MFSD2A	140.769	150.444	62.6132	120.24	109.566	123.281
SUGP2	129.752	146.378	101.477	118.791	92.9655	123.281
TMEM205	141.993	116.56	114.431	108.65	136.128	123.281
UFC1	100.374	140.956	77.7268	152.11	146.089	123.281
VAMP8	121.183	119.271	174.885	101.407	109.566	123.281
GFAP	162.802	100.296	157.613	75.3309	126.167	122.948
HADHB	135.872	105.717	116.59	133.278	116.207	122.948
MEGF9	156.682	119.271	79.8858	117.342	119.527	122.948
NFE2L2	129.752	109.783	129.545	89.8176	202.532	122.948
PSMA2	100.374	126.048	133.863	146.316	106.246	122.948
RBM5	153.009	100.296	140.34	114.445	89.6453	122.948
UHMK1	95.4779	182.972	71.2495	124.586	126.167	122.948
ITPRID2	156.682	90.8084	153.294	91.2663	132.808	122.616
OLFML2A	148.113	123.337	105.795	92.7149	146.089	122.616
PCOLCE	134.648	84.0317	224.544	62.2928	166.01	122.616
PEF1	89.3575	147.733	138.181	146.316	73.0443	122.616
SAMD4B	167.698	85.387	112.272	101.407	156.049	122.616
AP2A1	123.632	145.022	97.1584	121.688	102.926	122.284
EMC3	97.926	145.022	129.545	126.034	112.887	122.284
PAPOLA	132.2	111.139	153.294	94.1636	139.448	122.284
RAB18	108.943	147.733	88.5221	136.175	116.207	122.284
RBM8A	133.424	108.428	133.863	111.548	132.808	122.284
TGFBI	126.08	82.6763	243.976	78.2282	122.847	122.284
COL16A1	127.304	94.8745	138.181	152.11	79.6847	121.951
CTNND1	140.769	116.56	114.431	104.304	136.128	121.951
MMP2	111.391	90.8084	209.43	88.3689	169.33	121.951
RCAN1	138.321	124.692	127.386	99.9583	112.887	121.951
SAT2	134.648	108.428	140.34	111.548	116.207	121.951
CCT8	108.943	143.667	105.795	139.072	86.3251	121.619
HARS	101.598	134.18	86.3631	160.802	109.566	121.619
RER1	139.545	112.494	114.431	115.894	119.527	121.619
AMFR	129.752	112.494	116.59	130.38	106.246	121.287
BANF1	139.545	105.717	127.386	99.9583	149.409	121.287
GPR37L1	146.889	124.692	94.9994	107.202	116.207	121.287
NDRG3	86.9094	181.617	73.4086	131.829	116.207	121.287
RAB11B	89.3575	127.403	107.954	169.494	102.926	121.287
SEC62	123.632	117.915	110.113	91.2663	209.172	121.287
SNAP91	74.6686	170.774	49.6588	188.327	83.0049	121.287
STAT6	130.976	111.139	164.09	94.1636	116.207	121.287
STRAP	101.598	132.824	88.5221	170.943	83.0049	121.287
ATP5F1C	115.063	135.535	92.8403	128.932	126.167	120.955
IP6K2	143.217	104.362	114.431	131.829	86.3251	120.955
UROD	122.408	128.758	103.636	136.175	89.6453	120.955
CALB2	101.598	120.626	58.2951	208.609	66.4039	120.622
MKNK2	148.113	79.9656	131.704	110.099	152.729	120.622
PGLS	119.959	92.1638	129.545	155.008	99.6059	120.622
RABL6	110.167	116.56	133.863	128.932	119.527	120.622
RCN1	137.096	92.1638	131.704	108.65	156.049	120.622
ST6GALNAC6	123.632	116.56	140.34	112.996	109.566	120.622
ANP32B	145.665	79.9656	136.022	104.304	162.69	120.29
ARHGAP35	139.545	136.89	77.7268	107.202	122.847	120.29
CENPB	121.183	92.1638	155.454	95.6123	189.251	120.29
ECH1	126.08	131.469	120.908	112.996	92.9655	120.29
EML3	151.785	89.4531	170.567	89.8176	102.926	120.29
GLUD1	108.943	128.758	112.272	124.586	132.808	120.29
IRF9	145.665	94.8745	138.181	114.445	99.6059	120.29
ITPR3	168.922	85.387	131.704	112.996	73.0443	120.29
NRXN3	146.889	98.9405	75.5677	126.034	156.049	120.29
RNF13	121.183	124.692	88.5221	115.894	166.01	120.29
TMEM9	123.632	115.205	114.431	124.586	122.847	120.29
AGPAT1	122.408	100.296	125.226	133.278	122.847	119.958
PLOD3	170.147	85.387	142.499	81.1256	122.847	119.958
PROS1	146.889	82.6763	148.976	97.0609	146.089	119.958
BTBD2	113.839	108.428	116.59	143.418	112.887	119.625
FGL2	110.167	123.337	136.022	101.407	152.729	119.625
FKBP3	104.046	159.931	86.3631	130.38	89.6453	119.625
GARS	83.2371	149.088	75.5677	159.354	122.847	119.625
NDUFA5	90.5816	134.18	92.8403	157.905	116.207	119.625
NPEPPS	111.391	126.048	92.8403	146.316	106.246	119.625
SERPINA1	135.872	120.626	110.113	111.548	106.246	119.625
FKBP9	133.424	128.758	110.113	94.1636	129.488	119.293
MBOAT7	115.063	109.783	97.1584	163.7	86.3251	119.293
PTPN18	144.441	94.8745	146.817	101.407	109.566	119.293
TAFA5	149.337	111.139	105.795	111.548	96.2857	119.293
UBE2Z	102.822	123.337	131.704	123.137	126.167	119.293
CLIP2	105.271	135.535	75.5677	147.764	116.207	118.961
DYNC1I1	75.8927	161.287	77.7268	156.456	109.566	118.961
FLNB	153.009	94.8745	142.499	92.7149	109.566	118.961
LTBR	134.648	85.387	155.454	111.548	119.527	118.961
PWWP3A	140.769	105.717	105.795	127.483	92.9655	118.961
ANGPTL7	150.561	86.7424	142.499	70.9849	182.611	118.628
HGS	126.08	100.296	120.908	137.624	96.2857	118.628
LGI3	95.4779	191.104	64.7723	117.342	89.6453	118.628
RBIS	129.752	124.692	116.59	91.2663	139.448	118.628
CAPZA1	105.271	85.387	177.044	124.586	129.488	118.296
IST1	141.993	119.271	112.272	108.65	83.0049	118.296
KDELR1	132.2	111.139	129.545	111.548	96.2857	118.296
LUC7L3	135.872	105.717	114.431	110.099	126.167	118.296
NPLOC4	110.167	155.865	90.6812	117.342	92.9655	118.296
TSPYL1	89.3575	138.246	92.8403	163.7	83.0049	118.296
CNDP2	104.046	112.494	140.34	118.791	132.808	117.964
GFRA3	124.856	89.4531	129.545	128.932	126.167	117.964
NRCAM	97.926	135.535	60.4541	168.046	102.926	117.964
SEC11A	128.528	100.296	138.181	97.0609	149.409	117.964
TPM1	107.719	130.114	142.499	104.304	109.566	117.964
AVIL	82.0131	153.155	47.4997	181.084	89.6453	117.632
CRTAP	134.648	82.6763	146.817	98.5096	156.049	117.632
GRASP	139.545	100.296	168.408	89.8176	86.3251	117.632
ILF2	129.752	101.651	133.863	115.894	102.926	117.632
MIEN1	102.822	136.89	88.5221	152.11	76.3645	117.632
NUDCD3	111.391	112.494	90.6812	141.97	132.808	117.632
PXN	126.08	100.296	151.135	112.996	96.2857	117.632
SPAG9	127.304	111.139	112.272	114.445	122.847	117.632
PRRC2A	121.183	101.651	129.545	120.24	119.527	117.299
RALBP1	115.063	120.626	107.954	92.7149	185.931	117.299
SDC3	135.872	113.849	94.9994	117.342	109.566	117.299
CAPRIN1	112.615	127.403	92.8403	128.932	112.887	116.967
COBL	141.993	105.717	90.6812	114.445	122.847	116.967
HMGN3	139.545	109.783	92.8403	118.791	106.246	116.967
RHOG	134.648	96.2298	157.613	86.9202	126.167	116.967
SYBU	90.5816	157.221	77.7268	136.175	106.246	116.967
VPS4A	108.943	131.469	90.6812	131.829	109.566	116.967
CLDN11	146.889	79.9656	172.726	66.6389	152.729	116.635
ENSA	110.167	105.717	142.499	126.034	99.6059	116.635
MLLT6	141.993	104.362	140.34	78.2282	129.488	116.635
PSMD1	89.3575	126.048	101.477	139.072	139.448	116.635
RNF167	121.183	116.56	125.226	105.753	116.207	116.635
RTCA	89.3575	136.89	79.8858	166.597	83.0049	116.635
STMN4	66.1001	124.692	71.2495	208.609	92.9655	116.635
TTC3	106.495	117.915	97.1584	118.791	166.01	116.635
ATP2C1	101.598	117.915	86.3631	149.213	122.847	116.302
GRK2	135.872	90.8084	144.658	114.445	86.3251	116.302
IFNGR1	108.943	96.2298	153.294	95.6123	175.97	116.302
RAB5A	128.528	111.139	116.59	102.856	126.167	116.302
S100A16	154.234	107.073	151.135	63.7415	102.926	116.302
SNX6	124.856	88.0977	140.34	102.856	156.049	116.302
FGF1	100.374	161.287	107.954	95.6123	106.246	115.97
PGD	86.9094	119.271	88.5221	150.662	149.409	115.97
SEMA3C	170.147	89.4531	123.067	72.4335	122.847	115.97
SLC1A5	124.856	92.1638	146.817	91.2663	159.369	115.97
VOPP1	108.943	108.428	123.067	118.791	136.128	115.97
PIP5K1C	108.943	116.56	101.477	131.829	116.207	115.638
SIPA1	133.424	82.6763	161.931	105.753	99.6059	115.638
ATP6V1A	104.046	140.956	64.7723	150.662	79.6847	115.306
LMF2	134.648	98.9405	136.022	97.0609	112.887	115.306
MICAL1	149.337	70.4782	151.135	114.445	79.6847	115.306
RAP1A	128.528	88.0977	118.749	95.6123	185.931	115.306
SLC25A5	99.1501	120.626	103.636	111.548	172.65	115.306
PPP3CB	105.271	150.444	58.2951	133.278	99.6059	114.973
RAB3D	78.3408	153.155	79.8858	149.213	96.2857	114.973
SBNO2	121.183	89.4531	142.499	136.175	69.7241	114.973
AMD1	102.822	105.717	112.272	126.034	146.089	114.641
B4GALT2	90.5816	107.073	84.204	178.186	99.6059	114.641
CDK16	122.408	117.915	94.9994	136.175	66.4039	114.641
MADD	126.08	116.56	114.431	110.099	89.6453	114.641
MED15	118.735	109.783	112.272	123.137	99.6059	114.641
NUDT16	108.943	109.783	144.658	102.856	122.847	114.641
OAF	138.321	69.1228	159.772	92.7149	142.768	114.641
PIRT	86.9094	109.783	58.2951	189.776	116.207	114.641
PRKCA	140.769	85.387	107.954	114.445	126.167	114.641
SCG5	55.0834	178.906	25.9089	188.327	86.3251	114.641
HIF1A	96.702	112.494	131.704	101.407	169.33	114.309
VCL	133.424	90.8084	127.386	101.407	129.488	114.309
DBNDD2	111.391	124.692	112.272	105.753	116.207	113.976
EIF3A	100.374	96.2298	118.749	111.548	192.571	113.976
IMMT	101.598	132.824	118.749	104.304	116.207	113.976
MFSD1	101.598	104.362	155.454	120.24	92.9655	113.976
PCYT2	113.839	115.205	101.477	134.726	83.0049	113.976
PEMT	96.702	121.981	94.9994	139.072	112.887	113.976
UBE2I	155.458	89.4531	103.636	95.6123	119.527	113.976
CASKIN2	128.528	105.717	146.817	78.2282	122.847	113.644
DUSP23	113.839	113.849	131.704	111.548	89.6453	113.644
KIDINS220	123.632	101.651	97.1584	114.445	139.448	113.644
OGT	149.337	77.2549	127.386	107.202	99.6059	113.644
TMEM14C	106.495	132.824	112.272	112.996	89.6453	113.644
TMEM50B	112.615	103.007	136.022	118.791	96.2857	113.644
CNTNAP1	107.719	105.717	62.6132	175.289	83.0049	113.312
GOT2	82.0131	150.444	66.9314	143.418	109.566	113.312
KIF5B	96.702	117.915	114.431	99.9583	175.97	113.312
LONP1	108.943	104.362	127.386	117.342	116.207	113.312
LTBP1	151.785	98.9405	94.9994	78.2282	152.729	113.312
PRR13	112.615	113.849	107.954	136.175	69.7241	113.312
RGS4	99.1501	81.321	69.0904	205.711	86.3251	113.312
SESN3	159.13	96.2298	103.636	84.0229	112.887	113.312
SRI	138.321	77.2549	103.636	128.932	112.887	113.312
TIMM17A	78.3408	146.378	112.272	124.586	102.926	113.312
ARPC5L	99.1501	136.89	90.6812	120.24	109.566	112.979
CXXC5	144.441	88.0977	123.067	91.2663	122.847	112.979
FGFBP3	108.943	124.692	45.3406	139.072	139.448	112.979
GSDMD	157.906	86.7424	166.249	69.5362	73.0443	112.979
GSTM3	97.926	132.824	101.477	124.586	96.2857	112.979
PPP2R2B	102.822	136.89	58.2951	134.726	116.207	112.979
SIRT2	121.183	105.717	127.386	102.856	109.566	112.979
SSNA1	112.615	127.403	86.3631	128.932	83.0049	112.979
TMEM160	100.374	124.692	144.658	97.0609	106.246	112.979
TNFAIP2	132.2	90.8084	125.226	117.342	86.3251	112.979
BBS2	127.304	100.296	97.1584	121.688	106.246	112.647
IFNAR1	107.719	127.403	107.954	108.65	106.246	112.647
MPST	145.665	71.8335	127.386	101.407	126.167	112.647
MYO15B	157.906	71.8335	146.817	104.304	56.4433	112.647
RAB15	82.0131	124.692	69.0904	181.084	76.3645	112.647
REXO2	96.702	135.535	79.8858	137.624	92.9655	112.647
ZNF358	133.424	85.387	129.545	105.753	112.887	112.647
BEX4	105.271	109.783	84.204	136.175	126.167	112.315
COL12A1	156.682	94.8745	131.704	81.1256	76.3645	112.315
POLR2J	107.719	119.271	133.863	84.0229	139.448	112.315
PPP1R14B	121.183	94.8745	159.772	88.3689	112.887	112.315
ALPL	111.391	116.56	129.545	108.65	83.0049	111.983
ARHGEF26	146.889	75.8996	92.8403	107.202	146.089	111.983
CLASP1	85.6853	143.667	73.4086	137.624	106.246	111.983
EIF3D	119.959	101.651	131.704	82.5742	152.729	111.983
HMGN1	119.959	85.387	125.226	94.1636	175.97	111.983
MARVELD1	149.337	88.0977	103.636	102.856	102.926	111.983
MRGPRE	88.1334	134.18	99.3175	127.483	106.246	111.983
VAMP3	130.976	100.296	120.908	101.407	99.6059	111.983
ACTR1B	130.976	93.5191	97.1584	131.829	79.6847	111.65
MAN1B1	113.839	115.205	99.3175	102.856	136.128	111.65
PFDN2	88.1334	120.626	103.636	133.278	116.207	111.65
PPP1R7	88.1334	117.915	123.067	128.932	102.926	111.65
TLE1	139.545	115.205	112.272	85.4716	86.3251	111.65
ACAT1	101.598	124.692	112.272	98.5096	132.808	111.318
BNIP3L	132.2	88.0977	101.477	101.407	149.409	111.318
SCN4B	74.6686	181.617	43.1815	121.688	119.527	111.318
TMEM109	116.287	97.5852	181.362	66.6389	126.167	111.318
ANAPC5	133.424	109.783	120.908	92.7149	79.6847	110.986
CRK	106.495	101.651	92.8403	117.342	159.369	110.986
CSNK1E	134.648	78.6103	127.386	117.342	86.3251	110.986
EPS15	102.822	132.824	92.8403	110.099	109.566	110.986
MINK1	132.2	98.9405	101.477	108.65	102.926	110.986
NDUFV3	85.6853	146.378	120.908	98.5096	106.246	110.986
TMEM147	133.424	94.8745	120.908	89.8176	122.847	110.986
ADAMTS1	83.2371	81.321	291.475	53.6008	109.566	110.653
DAZAP1	117.511	90.8084	133.863	111.548	102.926	110.653
DEGS1	116.287	101.651	118.749	108.65	109.566	110.653
HNRNPAB	110.167	89.4531	146.817	114.445	99.6059	110.653
PDE4DIP	113.839	123.337	94.9994	112.996	89.6453	110.653
RNF10	89.3575	103.007	116.59	134.726	122.847	110.653
SERPINH1	110.167	82.6763	159.772	98.5096	132.808	110.653
SRSF9	99.1501	105.717	114.431	115.894	136.128	110.653
ATP2A2	119.959	117.915	103.636	102.856	92.9655	110.321
DEF8	119.959	111.139	86.3631	123.137	89.6453	110.321
EIF2S2	100.374	112.494	112.272	110.099	129.488	110.321
GNAQ	116.287	112.494	82.0449	127.483	92.9655	110.321
CALU	105.271	79.9656	170.567	92.7149	142.768	109.989
CDC42EP5	134.648	105.717	112.272	89.8176	96.2857	109.989
DNM1L	88.1334	107.073	88.5221	141.97	136.128	109.989
ELOVL1	124.856	97.5852	129.545	107.202	76.3645	109.989
MYO9B	123.632	75.8996	161.931	110.099	76.3645	109.989
POLR2K	101.598	127.403	103.636	115.894	86.3251	109.989
PTPRZ1	132.2	111.139	77.7268	101.407	116.207	109.989
TFG	67.3242	120.626	107.954	140.521	132.808	109.989
TPCN1	115.063	132.824	97.1584	108.65	63.0837	109.989
UBE2V2	108.943	131.469	79.8858	114.445	96.2857	109.989
ADH5	122.408	92.1638	129.545	101.407	106.246	109.657
C18orf32	86.9094	134.18	94.9994	128.932	89.6453	109.657
ERBIN	145.665	86.7424	110.113	81.1256	132.808	109.657
GOLM1	67.3242	103.007	90.6812	191.225	83.0049	109.657
LAMC1	143.217	71.8335	118.749	105.753	106.246	109.657
NDUFS3	105.271	138.246	112.272	95.6123	79.6847	109.657
PRKCZ	102.822	117.915	62.6132	162.251	59.7635	109.657
SCRN1	115.063	112.494	86.3631	114.445	112.887	109.657
SPINT2	100.374	116.56	79.8858	134.726	106.246	109.657
ARHGAP1	124.856	85.387	112.272	117.342	102.926	109.324
CD46	115.063	101.651	116.59	112.996	92.9655	109.324
CRAT	90.5816	127.403	99.3175	133.278	76.3645	109.324
LARP6	83.2371	121.981	73.4086	165.148	76.3645	109.324
RBFOX2	86.9094	119.271	103.636	128.932	109.566	109.324
SYN2	75.8927	153.155	71.2495	127.483	109.566	109.324
TCEA2	101.598	113.849	107.954	121.688	92.9655	109.324
TNFSF13	116.287	108.428	129.545	86.9202	112.887	109.324
AP3S2	83.2371	136.89	77.7268	139.072	89.6453	108.992
DMD	134.648	90.8084	118.749	78.2282	139.448	108.992
EIF2S3	118.735	103.007	110.113	85.4716	149.409	108.992
PRCP	117.511	113.849	107.954	91.2663	116.207	108.992
RALA	62.4279	130.114	84.204	156.456	112.887	108.992
TMEM208	88.1334	143.667	92.8403	120.24	79.6847	108.992
CYP27A1	134.648	86.7424	129.545	84.0229	116.207	108.66
LAIR1	116.287	103.007	148.976	89.8176	83.0049	108.66
NDUFA7	83.2371	143.667	90.6812	121.688	89.6453	108.66
STX7	117.511	109.783	94.9994	108.65	102.926	108.66
CAV1	100.374	93.5191	148.976	98.5096	126.167	108.327
CYCS	90.5816	113.849	101.477	124.586	116.207	108.327
DNAJB6	102.822	107.073	110.113	104.304	132.808	108.327
FNTA	133.424	89.4531	123.067	97.0609	89.6453	108.327
PMVK	116.287	103.007	92.8403	124.586	86.3251	108.327
TMEM50A	111.391	92.1638	123.067	95.6123	146.089	108.327
AK2	118.735	104.362	107.954	107.202	89.6453	107.995
AKR1A1	132.2	92.1638	118.749	86.9202	112.887	107.995
CACYBP	100.374	121.981	77.7268	115.894	122.847	107.995
ESD	115.063	103.007	107.954	98.5096	122.847	107.995
FLII	97.926	108.428	120.908	108.65	112.887	107.995
FXR2	104.046	119.271	84.204	123.137	92.9655	107.995
FXYD6	95.4779	86.7424	114.431	136.175	119.527	107.995
GNAZ	99.1501	117.915	75.5677	146.316	69.7241	107.995
PKN1	117.511	98.9405	151.135	79.6769	102.926	107.995
PMEPA1	151.785	58.28	172.726	50.7035	142.768	107.995
SLC4A2	133.424	90.8084	153.294	70.9849	96.2857	107.995
TBC1D9B	99.1501	98.9405	118.749	126.034	96.2857	107.995
ADD2	70.9964	128.758	56.136	166.597	99.6059	107.663
BMERB1	83.2371	131.469	51.8178	155.008	92.9655	107.663
CNST	73.4445	159.931	69.0904	134.726	69.7241	107.663
GTF3A	108.943	113.849	99.3175	101.407	116.207	107.663
PLS3	74.6686	153.155	94.9994	120.24	76.3645	107.663
RAB14	107.719	96.2298	123.067	105.753	116.207	107.663
XPO1	111.391	105.717	114.431	92.7149	126.167	107.663
CDC25B	132.2	88.0977	99.3175	114.445	83.0049	107.331
DMTN	90.5816	145.022	32.3861	134.726	112.887	107.331
EFS	161.578	77.2549	71.2495	110.099	83.0049	107.331
KXD1	101.598	112.494	105.795	120.24	83.0049	107.331
MAP6	66.1001	131.469	47.4997	169.494	109.566	107.331
MAST1	77.1168	158.576	60.4541	128.932	86.3251	107.331
PABPC4	111.391	89.4531	116.59	78.2282	192.571	107.331
PARVA	110.167	94.8745	110.113	107.202	126.167	107.331
SCAMP2	122.408	90.8084	146.817	78.2282	112.887	107.331
SLC9A3R1	116.287	101.651	99.3175	99.9583	126.167	107.331
TRAPPC2L	97.926	111.139	116.59	111.548	99.6059	107.331
TTC1	90.5816	143.667	62.6132	112.996	119.527	107.331
USP9X	117.511	112.494	90.6812	108.65	89.6453	107.331
CCT2	94.2538	121.981	79.8858	123.137	109.566	106.998
CYBC1	122.408	77.2549	168.408	95.6123	69.7241	106.998
DHRS3	140.769	70.4782	131.704	97.0609	89.6453	106.998
DHX30	101.598	97.5852	116.59	121.688	96.2857	106.998
DRAP1	133.424	97.5852	114.431	85.4716	96.2857	106.998
EIF4EBP2	130.976	89.4531	110.113	85.4716	129.488	106.998
HMOX2	102.822	135.535	101.477	91.2663	92.9655	106.998
NIPAL3	102.822	111.139	60.4541	153.559	73.0443	106.998
OGDH	96.702	132.824	90.6812	105.753	99.6059	106.998
SF3B6	101.598	98.9405	125.226	88.3689	156.049	106.998
CDV3	116.287	101.651	114.431	91.2663	116.207	106.666
CRELD1	100.374	124.692	107.954	110.099	69.7241	106.666
FIBP	75.8927	131.469	112.272	127.483	73.0443	106.666
FXR1	108.943	115.205	84.204	94.1636	142.768	106.666
HIPK3	130.976	67.7675	153.294	88.3689	106.246	106.666
LGMN	100.374	93.5191	168.408	89.8176	99.6059	106.666
SPATA13	138.321	89.4531	118.749	73.8822	119.527	106.666
CSNK1G2	115.063	96.2298	118.749	112.996	73.0443	106.334
FYN	123.632	94.8745	84.204	92.7149	152.729	106.334
GRSF1	91.8057	124.692	105.795	114.445	83.0049	106.334
HMG20B	161.578	78.6103	110.113	72.4335	96.2857	106.334
MSRB2	100.374	103.007	99.3175	139.072	66.4039	106.334
PRDX3	91.8057	116.56	116.59	111.548	92.9655	106.334
RGS11	129.752	94.8745	105.795	112.996	56.4433	106.334
SNRPC	89.3575	105.717	107.954	112.996	136.128	106.334
ZNF706	126.08	96.2298	97.1584	99.9583	106.246	106.334
ARHGEF4	151.785	79.9656	92.8403	104.304	69.7241	106.001
C7orf50	139.545	103.007	105.795	73.8822	96.2857	106.001
CADM1	116.287	89.4531	101.477	98.5096	142.768	106.001
CHMP3	113.839	90.8084	88.5221	124.586	106.246	106.001
CREG1	102.822	92.1638	148.976	75.3309	152.729	106.001
FAM89B	80.789	108.428	120.908	117.342	119.527	106.001
PPP5C	112.615	103.007	127.386	102.856	69.7241	106.001
SECISBP2L	105.271	90.8084	110.113	95.6123	162.69	106.001
ARFRP1	111.391	104.362	107.954	101.407	99.6059	105.669
BMP8B	133.424	85.387	79.8858	91.2663	152.729	105.669
CIITA	148.113	59.6354	153.294	82.5742	83.0049	105.669
DUT	108.943	107.073	101.477	108.65	92.9655	105.669
LYVE1	97.926	62.3461	250.453	52.1521	132.808	105.669
PLXNA3	133.424	60.9907	92.8403	136.175	89.6453	105.669
SGCE	133.424	97.5852	90.6812	84.0229	122.847	105.669
SIPA1L2	140.769	90.8084	105.795	79.6769	106.246	105.669
SPSB3	144.441	86.7424	118.749	82.5742	79.6847	105.669
TMX2	104.046	101.651	118.749	108.65	92.9655	105.669
TUBGCP2	112.615	108.428	110.113	91.2663	106.246	105.669
BABAM1	91.8057	100.296	90.6812	143.418	89.6453	105.337
C6orf89	118.735	104.362	112.272	86.9202	102.926	105.337
CISD1	50.1871	146.378	90.6812	136.175	106.246	105.337
DMAC1	102.822	120.626	88.5221	107.202	96.2857	105.337
EBP	82.0131	128.758	75.5677	143.418	69.7241	105.337
HAGH	107.719	117.915	77.7268	112.996	92.9655	105.337
PARP1	100.374	113.849	82.0449	118.791	102.926	105.337
PNRC1	106.495	85.387	107.954	82.5742	199.212	105.337
PXDN	149.337	78.6103	82.0449	110.099	76.3645	105.337
SCAMP5	74.6686	132.824	75.5677	127.483	116.207	105.337
SCYL1	112.615	100.296	101.477	111.548	89.6453	105.337
UBXN1	99.1501	96.2298	153.294	95.6123	92.9655	105.337
ADAM15	97.926	96.2298	187.84	73.8822	89.6453	105.004
ARF4	73.4445	131.469	77.7268	126.034	119.527	105.004
KAT2B	132.2	97.5852	86.3631	86.9202	119.527	105.004
MICAL3	118.735	90.8084	123.067	99.9583	86.3251	105.004
SPI1	112.615	100.296	120.908	79.6769	129.488	105.004
SYPL1	119.959	86.7424	107.954	84.0229	152.729	105.004
TMEM184B	107.719	97.5852	107.954	115.894	86.3251	105.004
AKAP13	86.9094	88.0977	116.59	123.137	132.808	104.672
BAALC	84.4612	98.9405	101.477	147.764	79.6847	104.672
BIRC2	128.528	100.296	125.226	69.5362	99.6059	104.672
COX20	106.495	111.139	79.8858	115.894	96.2857	104.672
DDX1	64.876	120.626	84.204	126.034	156.049	104.672
MAL	157.906	75.8996	112.272	50.7035	142.768	104.672
MS4A4A	93.0297	85.387	168.408	75.3309	152.729	104.672
MTFR1L	123.632	97.5852	101.477	108.65	66.4039	104.672
RAB34	121.183	85.387	116.59	89.8176	122.847	104.672
RBCK1	107.719	109.783	114.431	101.407	76.3645	104.672
SEMA4B	144.441	77.2549	92.8403	110.099	69.7241	104.672
SGTA	107.719	104.362	75.5677	110.099	129.488	104.672
TBCD	102.822	109.783	103.636	107.202	92.9655	104.672
UBE2N	80.789	116.56	118.749	126.034	69.7241	104.672
GBP2	134.648	66.4121	114.431	88.3689	136.128	104.34
HNRNPUL2	113.839	86.7424	123.067	102.856	96.2857	104.34
IER2	122.408	92.1638	172.726	65.1902	69.7241	104.34
ITM2C	102.822	94.8745	103.636	108.65	122.847	104.34
PLAAT4	127.304	75.8996	138.181	92.7149	86.3251	104.34
WDR45	102.822	100.296	97.1584	115.894	102.926	104.34
ANKRD10	143.217	74.5442	105.795	85.4716	109.566	104.008
BAG3	72.2205	165.353	64.7723	111.548	83.0049	104.008
CBX3	111.391	100.296	105.795	82.5742	139.448	104.008
CHMP4B	105.271	117.915	79.8858	94.1636	126.167	104.008
FAM234A	127.304	89.4531	94.9994	98.5096	102.926	104.008
PTPRJ	141.993	89.4531	86.3631	89.8176	96.2857	104.008
CISD3	106.495	103.007	101.477	111.548	83.0049	103.675
FKBP4	94.2538	111.139	127.386	101.407	79.6847	103.675
GALNT17	110.167	100.296	84.204	114.445	99.6059	103.675
RETREG1	96.702	127.403	86.3631	88.3689	126.167	103.675
SAA1	104.046	54.214	254.771	39.1141	139.448	103.675
TRAM1	108.943	90.8084	110.113	68.0875	192.571	103.675
CORO2B	111.391	117.915	71.2495	107.202	86.3251	103.343
DPM3	97.926	94.8745	142.499	92.7149	102.926	103.343
[truncated: 17,205 more rows]

## Sheet: neuronal_only
Gene	Cluster0 (CPM)	Cluster1 (CPM)	Cluster2 (CPM)	Cluster3 (CPM)	Cluster4 (CPM)	All Nodules (CPM)
TUBA1A	3495.96	5815.81	2988.16	7673.61	3818.23	4977.08
CLU	4704.12	4200.23	3469.64	5457.14	4073.88	4500.24
PSAP	3959.88	3931.87	3407.02	3992.54	3217.27	3801.09
NEFH	1913.23	6402.67	1938.85	2920.52	2775.68	3335.22
NEFL	1554.58	5970.32	1427.15	2655.41	2400.5	2954.75
S100A10	2672.16	3365.33	1876.24	3659.34	2450.3	2923.84
UCHL1	1844.68	3983.37	1517.83	4173.62	2178.05	2886.29
TUBB2A	1792.05	3362.62	1321.35	4640.09	1862.63	2765.01
MAP1B	1796.94	3636.4	1366.7	3791.17	2373.94	2696.89
LGALS1	2164.17	2764.91	2245.44	2730.74	2553.23	2492.86
STMN2	1350.16	2720.19	1023.4	3673.83	1753.06	2209.08
PRPH	1418.7	2664.62	1081.7	3631.82	1633.54	2201.44
NEFM	965.796	4246.31	1003.97	1422.59	1547.21	1938.93
THY1	1397.89	2375.93	1049.31	2720.6	1547.21	1902.38
HSP90AA1	1329.35	2081.82	1159.42	2099.12	1826.11	1713.97
UBB	1135.94	1679.28	1109.77	1492.13	1238.43	1357.08
PPIA	1128.6	1478.69	1163.74	1508.07	1175.35	1311.56
PKM	1020.88	1699.61	891.699	1667.42	956.217	1309.23
CALM2	1204.49	1394.65	1120.56	1340.02	1321.44	1280.99
SNCG	932.746	1785	652.041	1554.42	866.571	1234.47
HSP90AB1	927.849	1526.12	777.268	1513.86	1191.95	1212.2
YWHAH	845.836	1467.84	790.222	1526.9	946.256	1156.05
HSPA8	881.334	1438.03	822.608	1424.04	919.694	1137.11
ENO1	1157.98	1108.68	969.425	1076.36	1102.31	1092.58
YWHAG	755.255	1499.02	639.087	1357.4	876.532	1069.98
TUBB2B	731.997	1222.53	518.178	1757.24	743.724	1055.69
CALCA	596.125	857.936	500.906	2104.92	707.202	1002.86
CALM3	637.743	1081.57	641.246	1319.74	846.65	924.438
SOD1	712.412	1211.68	611.019	1087.95	800.167	914.137
ATP6V0C	707.516	1002.96	766.472	1083.61	929.655	897.522
RTN4	585.108	1233.37	533.292	1169.08	733.763	884.895
ALDOC	716.084	1274.03	537.61	924.252	727.123	874.262
RTN3	609.59	1303.85	507.383	1043.04	710.522	873.597
COX4I1	706.292	1059.88	727.609	928.598	717.162	848.343
ATP5F1B	663.449	1066.66	708.177	911.214	743.724	834.054
YWHAZ	674.466	954.166	550.564	1116.93	700.561	828.073
ENO2	618.158	1091.06	569.996	1047.39	567.754	820.098
GNG3	555.73	1129.01	468.52	1076.36	600.956	806.806
CALM1	635.295	924.348	621.814	976.404	707.202	789.527
KLC1	571.643	1012.45	479.315	1030	654.079	778.894
RTN1	416.186	1061.24	373.52	1284.97	521.271	777.565
NME2	697.723	740.021	701.7	776.487	657.399	722.736
NDUFA4	572.867	947.389	580.792	754.757	650.758	715.426
PRNP	626.727	802.367	425.338	980.75	527.911	710.109
PRDX1	669.569	807.788	617.496	693.913	717.162	705.789
PRDX5	583.884	806.433	557.042	860.51	624.197	701.802
DPYSL2	574.091	666.832	516.019	798.218	647.438	646.641
APLP2	572.867	706.137	567.837	711.297	561.113	635.343
EEF1A2	417.41	948.745	373.52	754.757	501.35	626.704
ARHGDIA	558.178	573.313	578.632	708.4	664.039	610.089
MAP1A	412.513	856.581	326.021	767.795	594.315	607.763
DHCR24	570.419	623.461	384.316	819.948	454.867	600.453
RABAC1	567.971	639.725	572.155	664.94	461.507	597.794
AP2M1	523.904	628.882	509.542	766.347	468.148	597.462
CHCHD2	517.784	674.964	485.792	688.119	507.99	589.487
DYNC1H1	446.788	746.798	358.407	809.807	418.345	587.161
NDRG4	359.878	849.804	241.817	844.575	471.468	584.17
TUBB4B	445.564	849.804	384.316	649.004	401.744	577.525
COX6A1	440.667	607.197	438.293	631.62	561.113	536.985
ACOT7	399.049	669.543	334.657	717.092	451.547	533.662
SARAF	446.788	603.131	410.225	660.594	434.946	527.348
HTRA1	490.854	679.03	373.52	488.202	434.946	512.727
PRDX2	425.978	692.584	390.793	557.738	378.502	511.398
VAT1	432.099	520.454	328.18	719.989	471.468	507.743
PCSK1N	385.584	567.891	263.407	825.742	328.699	506.746
DKK3	503.095	550.272	375.679	572.225	451.547	505.749
DYNLL2	418.634	628.882	306.589	635.966	444.906	505.417
SERINC1	425.978	538.074	367.043	593.955	617.557	502.094
BSCL2	368.447	643.791	295.793	682.324	415.025	501.43
SYT11	455.356	593.643	293.634	612.788	438.266	498.771
NDFIP1	378.239	527.231	347.611	612.788	424.985	468.533
TAC1	247.263	353.746	226.703	1012.62	474.788	468.533
CD44	482.286	417.448	371.361	541.803	458.187	460.558
CLTC	374.567	542.14	358.407	528.765	471.468	458.231
GAP43	320.708	462.174	278.521	750.411	381.823	453.579
LGALS3BP	478.614	380.853	429.656	453.434	511.31	444.607
PRUNE2	297.45	680.386	196.476	563.533	365.222	443.611
ATP1B1	313.363	664.121	218.067	537.457	318.739	436.632
FABP3	246.039	576.024	241.817	680.875	348.621	436.3
EDIL3	428.426	473.017	215.908	553.392	398.424	432.313
FBXO2	320.708	639.725	263.407	515.727	282.217	430.983
ATP5F1A	401.497	532.652	347.611	446.191	348.621	430.319
REEP5	292.554	601.775	304.43	480.959	411.704	425.335
GHITM	336.621	542.14	293.634	512.829	378.502	425.002
LDHB	361.102	504.19	341.134	415.768	431.626	412.707
TPPP3	276.641	513.678	259.089	592.506	322.059	409.052
GDI1	346.413	445.91	356.248	478.061	308.778	398.751
MAP1LC3B	292.554	535.363	278.521	488.202	312.098	396.757
PCP4	239.919	527.231	153.294	673.632	242.374	396.757
PLD3	408.841	406.605	343.293	450.537	285.537	395.428
YWHAQ	351.31	431.001	302.271	502.689	322.059	395.096
BEX1	254.608	477.083	189.999	649.004	249.015	389.115
KIF5A	269.297	481.149	207.271	605.544	252.335	387.121
CSDE1	400.273	368.655	306.589	415.768	418.345	383.466
SNRPN	277.865	517.744	205.112	502.689	325.379	381.804
AP2S1	325.604	433.712	319.543	428.807	348.621	377.152
ATP5IF1	257.056	555.693	239.657	450.537	285.537	374.826
DCTN2	296.226	409.316	297.953	470.818	361.901	370.839
VGF	241.143	365.944	177.044	649.004	345.3	365.854
CD24	250.935	452.687	123.067	575.122	305.458	360.537
YWHAB	266.848	414.737	287.157	382.449	448.227	350.901
RAB6B	274.193	451.331	181.362	486.753	258.975	350.569
L1CAM	400.273	296.822	183.521	478.061	262.296	345.584
NCDN	347.637	330.705	254.771	465.023	242.374	345.584
SPOCK2	211.765	458.108	189.999	492.548	278.896	339.935
TBCB	290.106	382.209	313.066	359.27	315.419	334.619
TUBA4A	228.902	506.901	209.43	394.038	239.054	332.957
ARL6IP5	275.417	372.721	276.362	350.578	381.823	327.308
RNF187	293.778	374.076	233.18	354.924	355.261	324.318
DCTN1	246.039	398.473	263.407	383.898	308.778	323.985
ATP5F1D	297.45	382.209	287.157	336.092	268.936	322.656
STMN3	237.471	444.555	200.794	392.59	272.256	321.659
VAMP2	275.417	291.4	259.089	447.639	292.177	318.004
PSMD2	286.434	345.614	254.771	373.757	222.453	309.697
ATP6V0D1	228.902	403.894	202.953	362.168	335.34	309.032
PFKP	209.317	467.596	196.476	337.54	292.177	308.368
SARS	236.247	388.985	261.248	382.449	209.172	308.368
ANK2	206.869	387.63	144.658	479.51	219.133	305.377
PCMT1	231.35	424.224	185.681	344.784	295.497	304.048
TMEM176A	331.724	317.152	220.226	311.464	285.537	301.722
ATP5MC3	244.815	387.63	239.657	281.042	368.542	299.728
ATP6V1E1	236.247	395.762	211.589	353.476	242.374	299.063
PIN1	260.728	397.117	256.93	295.529	205.852	296.073
PSMB4	250.935	318.507	263.407	328.848	308.778	293.082
REEP1	203.197	387.63	181.362	388.244	255.655	292.75
ADCYAP1	140.769	390.341	157.613	478.061	229.094	290.756
ATP6V0E1	272.969	311.73	295.793	275.247	278.896	287.101
PTPRN	203.197	346.97	129.545	459.229	209.172	286.436
DPYSL3	209.317	309.02	136.022	454.883	275.576	285.439
ACLY	235.023	327.995	196.476	386.795	185.931	281.784
RAB7A	285.21	277.847	233.18	302.772	305.458	281.452
CEND1	189.732	426.935	159.772	334.643	192.571	276.8
DNM1	179.939	397.117	168.408	356.373	185.931	272.48
REEP2	217.885	360.523	142.499	336.092	258.975	272.48
NDUFB9	247.263	338.837	224.544	283.939	215.813	271.483
PLBD2	233.798	307.664	183.521	350.578	232.414	270.818
ATP6AP2	233.798	276.491	248.294	324.502	252.335	269.157
SLC22A17	308.467	275.136	261.248	227.441	255.655	269.157
KIF21A	183.611	371.366	146.817	336.092	255.655	266.166
UQCRC1	250.935	290.045	222.385	296.977	232.414	264.837
STUB1	235.023	296.822	220.226	292.631	258.975	263.508
CYB5R1	175.043	319.863	185.681	376.654	222.453	263.176
PSMB5	208.093	318.507	224.544	299.875	249.015	262.843
ARL6IP1	241.143	311.73	179.203	282.491	282.217	262.511
NDUFC2	217.885	304.954	254.771	276.696	258.975	262.511
SNAP25	144.441	451.331	146.817	286.837	235.734	261.847
ENDOD1	265.624	272.425	187.84	304.221	212.493	258.856
MDH1	200.748	398.473	146.817	243.377	235.734	254.204
ACTR1A	214.213	280.557	181.362	324.502	219.133	251.213
SYP	206.869	258.872	168.408	357.822	235.734	251.213
NAPB	170.147	288.689	146.817	398.384	199.212	250.881
NAPA	220.334	294.111	228.862	253.517	219.133	247.226
SAP18	215.437	276.491	252.612	233.236	255.655	244.235
PAFAH1B1	189.732	267.004	177.044	317.259	209.172	237.921
CPE	182.387	346.97	133.863	257.863	219.133	236.26
RCAN2	149.337	315.796	138.181	336.092	179.291	234.266
CALCB	148.113	239.897	129.545	430.255	162.69	233.934
NMB	148.113	267.004	183.521	344.784	209.172	233.934
UBA1	281.537	216.856	228.862	236.133	142.768	233.269
TOMM5	153.009	265.649	200.794	317.259	215.813	231.94
ATP6V0E2	188.508	284.623	168.408	291.183	179.291	231.608
VDAC2	176.267	265.649	192.158	301.324	182.611	229.946
CDKN2D	153.009	309.02	112.272	318.708	212.493	228.95
ABCA3	215.437	238.542	140.34	321.605	146.089	226.956
PSMA7	188.508	291.4	187.84	215.852	258.975	226.956
EPDR1	153.009	287.334	114.431	349.13	169.33	226.624
MID1IP1	228.902	243.963	172.726	221.647	272.256	226.624
SCARB2	243.591	207.368	248.294	199.917	252.335	226.291
MDH2	203.197	256.161	213.749	252.069	149.409	223.633
PSMC3	215.437	227.699	213.749	224.544	222.453	220.975
HSPA9	192.18	269.715	183.521	218.749	229.094	219.645
RAB6A	198.3	257.516	164.09	221.647	255.655	218.649
ACHE	160.354	207.368	136.022	373.757	172.65	218.316
NCS1	187.284	227.699	138.181	324.502	159.369	218.316
TMEM30A	205.645	253.45	155.454	249.171	179.291	216.987
USP5	166.474	243.963	174.885	268.004	202.532	213.664
B4GAT1	228.902	230.409	157.613	234.685	166.01	213.332
PFN2	176.267	262.938	142.499	237.582	215.813	210.341
TPRG1L	146.889	287.334	174.885	223.095	212.493	209.677
SYNGR1	204.421	219.567	174.885	249.171	136.128	207.018
HADHA	201.972	210.079	220.226	207.16	179.291	205.689
VAMP1	148.113	352.391	110.113	198.468	162.69	205.357
KIFAP3	143.217	233.12	131.704	298.426	166.01	201.369
SLC25A4	150.561	304.954	131.704	211.506	156.049	200.04
VDAC3	141.993	224.988	129.545	301.324	162.69	199.043
PAFAH1B2	199.524	196.526	196.476	186.879	232.414	198.711
TMEFF2	118.735	224.988	92.8403	352.027	152.729	197.714
ABHD2	170.147	257.516	142.499	204.263	189.251	197.05
SYNGR3	146.889	220.922	99.3175	299.875	182.611	196.385
MAPRE2	160.354	226.343	138.181	208.609	262.296	194.391
TMX4	155.458	199.236	129.545	268.004	195.892	192.065
NDUFAB1	172.595	237.186	142.499	212.955	159.369	191.733
CNTN2	188.508	214.145	144.658	224.544	136.128	191.068
CDS2	159.13	193.815	146.817	273.799	142.768	190.404
FAM189B	150.561	234.475	146.817	237.582	119.527	187.413
APBB1	184.835	208.724	157.613	197.019	162.69	187.081
NCOA7	134.648	204.658	157.613	249.171	179.291	186.084
SDHA	155.458	264.293	170.567	179.635	109.566	185.419
ATP1A3	119.959	256.161	112.272	237.582	162.69	183.426
PTPA	192.18	193.815	168.408	199.917	116.207	183.093
FGF13	130.976	196.526	90.6812	291.183	166.01	181.099
ANO5	105.271	264.293	79.8858	272.35	122.847	180.435
ARL8A	149.337	203.302	138.181	215.852	185.931	179.77
SULT4A1	119.959	249.384	86.3631	256.415	139.448	179.77
CPLX2	118.735	268.359	97.1584	231.787	132.808	179.438
SEC11C	164.026	211.435	125.226	192.673	189.251	178.773
AP1S1	129.752	189.749	127.386	272.35	142.768	178.109
KIF5C	132.2	238.542	84.204	231.787	162.69	176.78
CCSER2	113.839	214.145	129.545	231.787	199.212	176.447
NSF	118.735	214.145	112.272	230.339	199.212	174.786
FXYD7	80.789	332.061	110.113	183.981	119.527	174.454
TOMM20	167.698	178.906	153.294	172.392	215.813	174.121
CDIPT	161.578	192.46	157.613	186.879	156.049	173.789
DCTN3	157.906	196.526	148.976	199.917	126.167	172.46
TMEM59L	122.408	254.806	107.954	182.533	146.089	168.805
TAGLN3	116.287	243.963	112.272	204.263	122.847	167.808
APOL2	139.545	197.881	144.658	198.468	122.847	166.479
EPB41L1	126.08	211.435	92.8403	234.685	122.847	166.479
MOAP1	117.511	173.485	114.431	260.761	146.089	166.479
SYT4	117.511	184.328	116.59	253.517	132.808	166.479
DYNLT3	127.304	226.343	82.0449	205.711	139.448	163.82
FKBP1B	124.856	161.287	110.113	269.453	116.207	163.82
DDX24	140.769	174.84	110.113	197.019	195.892	162.823
PTPRA	187.284	151.799	125.226	182.533	132.808	162.491
NACAD	118.735	197.881	92.8403	227.441	136.128	160.83
RUNDC3A	108.943	206.013	84.204	220.198	149.409	158.504
LARP1	129.752	172.129	129.545	183.981	182.611	157.839
ACTR10	130.976	188.394	94.9994	214.403	116.207	157.174
WFS1	155.458	191.104	114.431	168.046	119.527	157.174
HSD17B12	134.648	168.063	125.226	170.943	199.212	156.178
RETREG2	132.2	181.617	133.863	189.776	116.207	156.178
CHPF	170.147	173.485	112.272	166.597	102.926	154.516
MAPK8IP2	117.511	218.211	99.3175	183.981	116.207	154.516
SPOCK1	106.495	203.302	84.204	227.441	106.246	154.516
TPGS2	108.943	177.551	105.795	201.365	185.931	154.184
EMC4	127.304	169.419	159.772	159.354	162.69	153.519
ALCAM	123.632	170.774	97.1584	194.122	182.611	153.187
LANCL1	112.615	201.947	101.477	176.738	146.089	150.861
ATL1	105.271	216.856	79.8858	179.635	152.729	150.529
CAPN1	144.441	145.022	166.249	159.354	132.808	150.196
PCBP3	108.943	193.815	88.5221	205.711	122.847	150.196
PFKM	108.943	185.683	133.863	169.494	146.089	149.199
NME1	153.009	200.592	92.8403	140.521	112.887	148.535
WSB2	123.632	138.246	123.067	217.301	122.847	148.535
PRAF2	126.08	170.774	146.817	162.251	122.847	148.202
TPD52	95.4779	180.262	97.1584	208.609	149.409	147.87
NTRK1	97.926	117.915	103.636	285.388	89.6453	145.876
DNER	69.7723	257.516	82.0449	170.943	102.926	144.215
TXNL1	111.391	174.84	92.8403	188.327	119.527	142.554
PCBD1	111.391	127.403	146.817	197.019	126.167	141.889
CAPN5	121.183	130.114	131.704	198.468	109.566	141.557
MAP7D2	86.9094	233.12	94.9994	144.867	129.488	141.557
CALY	90.5816	187.038	97.1584	192.673	112.887	140.892
LYNX1	101.598	154.51	94.9994	198.468	142.768	139.895
SYNM	153.009	135.535	112.272	149.213	136.128	139.895
DGKH	117.511	115.205	58.2951	241.928	139.448	138.566
SCD5	134.648	180.262	79.8858	156.456	96.2857	138.566
ICMT	99.1501	153.155	99.3175	195.571	136.128	138.234
DHRS7	145.665	127.403	159.772	117.342	152.729	137.569
USP11	141.993	131.469	123.067	157.905	112.887	137.237
ARHGDIG	97.926	146.378	92.8403	217.301	96.2857	136.24
G3BP2	100.374	145.022	110.113	179.635	142.768	135.243
CPNE6	89.3575	241.252	69.0904	130.38	109.566	134.911
GNAO1	68.5482	159.931	77.7268	234.685	112.887	134.911
CLPTM1	135.872	131.469	138.181	143.418	109.566	134.246
CAMLG	99.1501	166.708	94.9994	165.148	136.128	133.914
NAT8L	111.391	204.658	75.5677	126.034	122.847	133.249
DHCR7	113.839	131.469	90.6812	191.225	119.527	132.917
AKAP6	97.926	182.972	88.5221	153.559	116.207	131.92
CNTN1	105.271	166.708	94.9994	149.213	129.488	131.256
PREPL	108.943	146.378	99.3175	162.251	126.167	130.591
AHSA1	127.304	149.088	114.431	131.829	109.566	129.926
PGM2L1	101.598	120.626	82.0449	204.263	122.847	128.93
CYFIP2	116.287	123.337	88.5221	181.084	112.887	128.265
RTN2	118.735	154.51	86.3631	152.11	89.6453	127.268
G6PC3	121.183	151.799	103.636	121.688	122.847	126.271
APC2	127.304	140.956	69.0904	157.905	96.2857	125.607
CPNE3	110.167	131.469	99.3175	137.624	166.01	125.607
SUSD2	78.3408	234.475	101.477	84.0229	119.527	125.607
CADPS	85.6853	157.221	62.6132	191.225	96.2857	124.942
KIF3A	90.5816	174.84	69.0904	146.316	132.808	124.942
RAB3A	83.2371	227.699	62.6132	111.548	106.246	124.277
ELAVL4	74.6686	138.246	45.3406	214.403	132.808	123.613
AGT	105.271	142.312	161.931	95.6123	129.488	123.281
UHMK1	95.4779	182.972	71.2495	124.586	126.167	122.948
AP2A1	123.632	145.022	97.1584	121.688	102.926	122.284
EMC3	97.926	145.022	129.545	126.034	112.887	122.284
HARS	101.598	134.18	86.3631	160.802	109.566	121.619
NDRG3	86.9094	181.617	73.4086	131.829	116.207	121.287
SNAP91	74.6686	170.774	49.6588	188.327	83.0049	121.287
BTBD2	113.839	108.428	116.59	143.418	112.887	119.625
LGI3	95.4779	191.104	64.7723	117.342	89.6453	118.628
TSPYL1	89.3575	138.246	92.8403	163.7	83.0049	118.296
AVIL	82.0131	153.155	47.4997	181.084	89.6453	117.632
NUDCD3	111.391	112.494	90.6812	141.97	132.808	117.632
SYBU	90.5816	157.221	77.7268	136.175	106.246	116.967
PSMD1	89.3575	126.048	101.477	139.072	139.448	116.635
STMN4	66.1001	124.692	71.2495	208.609	92.9655	116.635
ATP6V1A	104.046	140.956	64.7723	150.662	79.6847	115.306
RAB3D	78.3408	153.155	79.8858	149.213	96.2857	114.973
CDK16	122.408	117.915	94.9994	136.175	66.4039	114.641
PIRT	86.9094	109.783	58.2951	189.776	116.207	114.641
SCG5	55.0834	178.906	25.9089	188.327	86.3251	114.641
CNTNAP1	107.719	105.717	62.6132	175.289	83.0049	113.312
GOT2	82.0131	150.444	66.9314	143.418	109.566	113.312
RGS4	99.1501	81.321	69.0904	205.711	86.3251	113.312
RAB15	82.0131	124.692	69.0904	181.084	76.3645	112.647
BEX4	105.271	109.783	84.204	136.175	126.167	112.315
MRGPRE	88.1334	134.18	99.3175	127.483	106.246	111.983
PPP1R7	88.1334	117.915	123.067	128.932	102.926	111.65
SCN4B	74.6686	181.617	43.1815	121.688	119.527	111.318
DEGS1	116.287	101.651	118.749	108.65	109.566	110.653
DNM1L	88.1334	107.073	88.5221	141.97	136.128	109.989
GOLM1	67.3242	103.007	90.6812	191.225	83.0049	109.657
PRKCZ	102.822	117.915	62.6132	162.251	59.7635	109.657
FXR2	104.046	119.271	84.204	123.137	92.9655	107.995
GNAZ	99.1501	117.915	75.5677	146.316	69.7241	107.995
ADD2	70.9964	128.758	56.136	166.597	99.6059	107.663
DMTN	90.5816	145.022	32.3861	134.726	112.887	107.331
MAP6	66.1001	131.469	47.4997	169.494	109.566	107.331
MAST1	77.1168	158.576	60.4541	128.932	86.3251	107.331
TTC1	90.5816	143.667	62.6132	112.996	119.527	107.331
HMOX2	102.822	135.535	101.477	91.2663	92.9655	106.998
NIPAL3	102.822	111.139	60.4541	153.559	73.0443	106.998
CRELD1	100.374	124.692	107.954	110.099	69.7241	106.666
CISD1	50.1871	146.378	90.6812	136.175	106.246	105.337
SCAMP5	74.6686	132.824	75.5677	127.483	116.207	105.337
DDX1	64.876	120.626	84.204	126.034	156.049	104.672
DYNC1I2	104.046	101.651	90.6812	107.202	116.207	103.343
RET	89.3575	145.022	41.0225	134.726	56.4433	102.678
PPP2R5B	69.7723	132.824	86.3631	131.829	66.4039	101.682
SEZ6L2	63.6519	138.246	49.6588	149.213	86.3251	101.682
EML2	90.5816	107.073	66.9314	144.867	63.0837	100.685
CDIP1	83.2371	119.271	71.2495	128.932	76.3645	100.02
MVK	77.1168	103.007	73.4086	147.764	86.3251	100.02
SCN9A	73.4445	107.073	60.4541	130.38	142.768	99.6878
SYN1	51.4112	146.378	41.0225	159.354	59.7635	98.6909
DNAJC6	69.7723	143.667	45.3406	124.586	79.6847	97.694
PODXL2	64.876	132.824	77.7268	120.24	73.0443	97.0294
DNAJA4	73.4445	111.139	49.6588	140.521	92.9655	96.3649
TMEM130	47.7389	136.89	51.8178	155.008	59.7635	96.0326
NRXN1	110.167	67.7675	86.3631	104.304	109.566	94.7034
VSNL1	55.0834	212.79	41.0225	46.3575	79.6847	92.045
ZDHHC2	73.4445	92.1638	69.0904	123.137	102.926	91.7128
KLC2	74.6686	124.692	56.136	112.996	56.4433	91.0482
PPP3CA	80.789	94.8745	62.6132	105.753	119.527	91.0482
DPYSL5	67.3242	123.337	45.3406	131.829	46.4827	90.3836
GOT1	62.4279	132.824	56.136	115.894	56.4433	90.3836
HSPH1	77.1168	94.8745	77.7268	118.791	63.0837	89.719
NDUFS1	83.2371	101.651	79.8858	97.0609	76.3645	89.719
GDE1	85.6853	96.2298	79.8858	98.5096	76.3645	89.3867
CMAS	59.9797	108.428	60.4541	115.894	96.2857	88.3898
PNMA1	67.3242	108.428	49.6588	108.65	106.246	88.0575
MAPT	66.1001	103.007	49.6588	130.38	69.7241	87.7252
DYNC1LI1	69.7723	88.0977	64.7723	112.996	102.926	86.7284
SCG2	67.3242	63.7014	28.068	159.354	106.246	85.3992
SLC25A23	88.1334	78.6103	53.9769	98.5096	112.887	85.3992
CAMK2N2	53.8593	108.428	43.1815	123.137	89.6453	85.0669
ATP6V1H	68.5482	103.007	64.7723	94.1636	92.9655	84.7346
SYT1	62.4279	86.7424	41.0225	130.38	96.2857	84.07
AGPAT3	77.1168	109.783	64.7723	78.2282	76.3645	83.4054
NSG1	46.5149	145.022	41.0225	104.304	49.8029	83.4054
PPM1J	69.7723	101.651	53.9769	112.996	49.8029	83.0731
TMEM14A	67.3242	108.428	62.6132	91.2663	76.3645	83.0731
TMEM63B	46.5149	113.849	82.0449	118.791	26.5616	83.0731
ADAM23	72.2205	94.8745	47.4997	101.407	86.3251	82.0763
DBNDD1	59.9797	138.246	49.6588	75.3309	66.4039	81.744
PHF24	55.0834	101.651	56.136	105.753	89.6453	81.744
RGMB	59.9797	119.271	38.8634	85.4716	106.246	81.744
TM2D2	55.0834	127.403	43.1815	81.1256	102.926	81.744
TTLL7	51.4112	113.849	60.4541	88.3689	102.926	81.744
TOMM34	67.3242	113.849	41.0225	101.407	49.8029	80.7471
PSMD12	58.7556	93.5191	49.6588	110.099	79.6847	79.7502
SLC2A6	53.8593	101.651	53.9769	105.753	73.0443	79.4179
MFN2	62.4279	93.5191	56.136	107.202	53.1231	78.4211
DIRAS1	52.6353	139.601	34.5452	86.9202	39.8424	77.7565
SPTBN2	51.4112	97.5852	45.3406	111.548	59.7635	76.4273
TNFRSF21	56.3075	96.2298	41.0225	98.5096	86.3251	76.4273
NAP1L5	44.0667	90.8084	30.2271	127.483	79.6847	76.095
CAMK2G	59.9797	84.0317	56.136	101.407	59.7635	74.7658
STAC	64.876	89.4531	45.3406	101.407	49.8029	74.7658
PCSK2	69.7723	79.9656	62.6132	91.2663	53.1231	74.4335
TMEM179	67.3242	98.9405	34.5452	92.7149	49.8029	74.1012
SRPRB	52.6353	86.7424	73.4086	65.1902	119.527	73.769
APLP1	52.6353	81.321	36.7043	120.24	46.4827	72.1075
HSPB8	45.2908	120.626	47.4997	84.0229	36.5222	72.1075
NRIP3	39.1704	113.849	51.8178	86.9202	56.4433	72.1075
SH3GL2	40.3945	108.428	58.2951	78.2282	76.3645	72.1075
APC	58.7556	90.8084	47.4997	75.3309	89.6453	71.7752
CHGB	52.6353	98.9405	34.5452	104.304	23.2414	70.1137
TLCD3B	35.4982	124.692	79.8858	53.6008	53.1231	70.1137
PTDSS1	63.6519	78.6103	66.9314	75.3309	49.8029	69.1169
ANKRD52	53.8593	90.8084	60.4541	75.3309	49.8029	68.4523
SPOCK3	41.6186	101.651	28.068	97.0609	49.8029	67.7877
CHGA	25.7056	123.337	41.0225	76.7795	59.7635	67.1231
EPRS	68.5482	70.4782	49.6588	72.4335	69.7241	67.1231
HSPA1B	45.2908	86.7424	58.2951	73.8822	76.3645	67.1231
JPH3	47.7389	70.4782	36.7043	115.894	46.4827	67.1231
OSBPL8	69.7723	75.8996	56.136	56.4982	79.6847	67.1231
SCG3	50.1871	74.5442	23.7498	104.304	73.0443	66.7908
OPA1	51.4112	90.8084	43.1815	63.7415	89.6453	66.4585
SLC27A4	63.6519	74.5442	43.1815	82.5742	49.8029	66.1262
HCN2	39.1704	108.428	45.3406	73.8822	46.4827	65.7939
FAM131B	44.0667	66.4121	41.0225	110.099	56.4433	65.4616
FBLL1	42.8426	101.651	23.7498	88.3689	46.4827	65.1293
GP1BB	48.963	69.1228	47.4997	102.856	39.8424	65.1293
INA	46.5149	54.214	43.1815	128.932	29.8818	65.1293
TMEM132E	59.9797	108.428	25.9089	65.1902	33.202	65.1293
PDZD8	62.4279	71.8335	53.9769	63.7415	63.0837	63.8002
SST	70.9964	43.3712	19.4317	105.753	56.4433	62.8033
TMEM35A	39.1704	84.0317	38.8634	84.0229	63.0837	62.8033
CHST8	35.4982	107.073	36.7043	63.7415	56.4433	61.8064
ATP6V1G2	36.7223	96.2298	53.9769	63.7415	49.8029	61.4741
PAFAH1B3	55.0834	75.8996	23.7498	82.5742	49.8029	61.1418
GRIN1	48.963	84.0317	32.3861	75.3309	46.4827	60.8095
PDP1	62.4279	52.8586	53.9769	72.4335	59.7635	60.8095
SLC25A25	59.9797	66.4121	73.4086	53.6008	46.4827	60.8095
ASB6	42.8426	74.5442	56.136	73.8822	46.4827	60.145
LXN	39.1704	58.28	43.1815	98.5096	59.7635	60.145
CRMP1	35.4982	88.0977	30.2271	81.1256	53.1231	59.8127
ZNF622	45.2908	77.2549	49.6588	70.9849	46.4827	59.8127
KCND3	33.05	70.4782	41.0225	86.9202	69.7241	59.4804
IRGQ	58.7556	62.3461	47.4997	73.8822	33.202	58.8158
MIGA1	41.6186	77.2549	28.068	70.9849	76.3645	58.4835
ELAVL3	40.3945	86.7424	34.5452	65.1902	56.4433	58.1512
ATRNL1	45.2908	73.1889	36.7043	76.7795	43.1626	57.8189
CKAP5	59.9797	48.7926	45.3406	65.1902	66.4039	56.822
FGF12	35.4982	74.5442	32.3861	95.6123	19.9212	56.822
CCDC6	42.8426	63.7014	60.4541	66.6389	46.4827	56.4897
ELAVL2	35.4982	98.9405	21.5908	62.2928	46.4827	56.1574
NUP93	57.5316	74.5442	43.1815	49.2548	43.1626	56.1574
PPP2R2C	39.1704	84.0317	23.7498	76.7795	36.5222	56.1574
ATP8A2	36.7223	78.6103	36.7043	59.3955	66.4039	55.1606
PVALB	33.05	130.114	17.2726	28.9734	43.1626	54.496
RIMKLA	19.5852	89.4531	43.1815	53.6008	79.6847	54.1637
CDK5R2	28.1537	59.6354	43.1815	79.6769	66.4039	53.8314
UBASH3B	44.0667	56.9247	30.2271	84.0229	39.8424	53.8314
FRMPD1	33.05	73.1889	23.7498	78.2282	49.8029	53.4991
RAB3C	31.826	67.7675	21.5908	91.2663	39.8424	53.4991
SNPH	48.963	78.6103	36.7043	55.0495	26.5616	53.4991
SLC9A6	41.6186	62.3461	32.3861	66.6389	63.0837	53.1668
ADAM22	36.7223	73.1889	43.1815	59.3955	39.8424	52.1699
C9orf78	59.9797	46.0819	41.0225	50.7035	66.4039	52.1699
OGDHL	28.1537	84.0317	38.8634	66.6389	26.5616	52.1699
FSD1	41.6186	67.7675	19.4317	73.8822	39.8424	51.8376
SACS	35.4982	78.6103	30.2271	46.3575	73.0443	51.5054
WDR47	41.6186	42.0158	30.2271	92.7149	36.5222	51.1731
NPTX1	33.05	84.0317	41.0225	55.0495	23.2414	50.8408
GNB5	45.2908	65.0568	15.1135	62.2928	56.4433	50.5085
BRSK1	47.7389	59.6354	36.7043	52.1521	49.8029	50.1762
RBFOX1	31.826	51.5033	28.068	82.5742	49.8029	49.5116
SV2A	45.2908	50.1479	25.9089	66.6389	56.4433	49.5116
TMEM255A	47.7389	52.8586	23.7498	55.0495	69.7241	49.1793
DPP6	35.4982	50.1479	21.5908	79.6769	53.1231	48.847
SCN11A	51.4112	40.6605	17.2726	84.0229	29.8818	48.847
TCAF1	23.2574	56.9247	45.3406	55.0495	89.6453	48.847
LINGO1	31.826	60.9907	38.8634	66.6389	36.5222	48.5147
STX1B	26.9297	77.2549	28.068	50.7035	56.4433	47.8501
RSPO2	26.9297	60.9907	25.9089	69.5362	46.4827	46.8533
SAMD14	48.963	59.6354	21.5908	55.0495	29.8818	46.8533
STX1A	35.4982	40.6605	23.7498	95.6123	13.2808	46.521
APBA1	42.8426	46.0819	21.5908	65.1902	49.8029	46.1887
DOK4	34.2741	48.7926	41.0225	68.0875	23.2414	45.5241
MANEAL	25.7056	85.387	21.5908	46.3575	36.5222	45.5241
ELOVL4	36.7223	56.9247	19.4317	59.3955	43.1626	44.8595
ADAM11	37.9463	79.9656	25.9089	33.3194	23.2414	43.8626
ANK1	28.1537	79.9656	17.2726	52.1521	19.9212	43.8626
TMEM63C	34.2741	40.6605	38.8634	62.2928	39.8424	43.5303
DNAJA2	40.3945	40.6605	41.0225	50.7035	43.1626	43.198
SLC6A15	23.2574	50.1479	10.7954	79.6769	43.1626	42.8657
NMNAT2	24.4815	59.6354	12.9545	65.1902	43.1626	42.5335
NIPA1	36.7223	50.1479	36.7043	52.1521	23.2414	42.2012
AP3B2	22.0334	60.9907	23.7498	57.9468	36.5222	41.5366
UBE2O	40.3945	43.3712	43.1815	44.9088	29.8818	41.5366
NAP1L2	34.2741	48.7926	25.9089	47.8061	49.8029	41.2043
STS	24.4815	58.28	21.5908	57.9468	33.202	40.872
CASKIN1	29.3778	51.5033	32.3861	47.8061	36.5222	40.2074
MAP9	25.7056	62.3461	21.5908	44.9088	43.1626	40.2074
P2RX3	25.7056	50.1479	21.5908	57.9468	43.1626	40.2074
GALNT8	30.6019	39.3051	21.5908	68.0875	29.8818	39.8751
HTR3A	52.6353	18.9749	25.9089	68.0875	13.2808	39.8751
GABRB3	36.7223	46.0819	34.5452	43.4601	29.8818	39.5428
LONRF2	37.9463	37.9498	25.9089	59.3955	23.2414	39.5428
NRXN2	35.4982	42.0158	34.5452	40.5628	49.8029	39.5428
STBD1	19.5852	60.9907	21.5908	47.8061	46.4827	39.2105
AMPH	31.826	50.1479	25.9089	40.5628	43.1626	38.5459
SYT2	24.4815	78.6103	10.7954	34.7681	29.8818	38.5459
SRXN1	39.1704	51.5033	12.9545	42.0115	33.202	38.2136
FBXL16	25.7056	42.0158	21.5908	63.7415	23.2414	37.5491
LRP3	35.4982	36.5944	34.5452	37.6654	36.5222	36.2199
SCN2B	29.3778	29.8177	30.2271	57.9468	29.8818	36.2199
JPH4	26.9297	44.7265	17.2726	52.1521	29.8818	35.8876
RAB11FIP4	24.4815	36.5944	32.3861	56.4982	23.2414	35.8876
TLX3	29.3778	40.6605	23.7498	52.1521	23.2414	35.8876
ATCAY	15.913	48.7926	15.1135	60.8442	29.8818	35.5553
UNC13A	22.0334	36.5944	23.7498	65.1902	19.9212	35.5553
GDAP1	26.9297	36.5944	21.5908	49.2548	43.1626	35.223
PNMA2	29.3778	43.3712	21.5908	44.9088	29.8818	35.223
PRKCE	23.2574	51.5033	15.1135	43.4601	39.8424	35.223
WIPF3	31.826	48.7926	12.9545	44.9088	19.9212	34.8907
PCSK1	26.9297	32.5284	28.068	50.7035	29.8818	34.2261
RIMS3	20.8093	37.9498	10.7954	65.1902	26.5616	34.2261
CACNA1B	15.913	33.8837	38.8634	62.2928	9.96059	33.8938
TPBGL	15.913	65.0568	25.9089	31.8708	23.2414	33.8938
BSN	18.3611	36.5944	10.7954	62.2928	36.5222	33.5616
CNTNAP2	17.1371	50.1479	17.2726	53.6008	13.2808	33.2293
SLC6A17	23.2574	54.214	17.2726	34.7681	29.8818	33.2293
FAM234B	28.1537	31.173	28.068	47.8061	23.2414	32.897
KCNH2	25.7056	48.7926	19.4317	39.1141	19.9212	32.897
PDZD7	22.0334	47.4372	32.3861	39.1141	13.2808	32.897
MARK1	19.5852	46.0819	23.7498	43.4601	23.2414	32.5647
FRY	24.4815	40.6605	25.9089	30.4221	46.4827	32.2324
PEG3	23.2574	37.9498	17.2726	50.7035	23.2414	32.2324
PHYHIPL	15.913	55.5693	21.5908	30.4221	39.8424	32.2324
GABRG2	20.8093	54.214	12.9545	36.2168	26.5616	31.9001
GALNT9	25.7056	39.3051	21.5908	43.4601	16.601	31.5678
CHD5	25.7056	28.4623	15.1135	44.9088	29.8818	29.574
SYT7	13.4648	17.6195	17.2726	68.0875	33.202	29.574
RPH3A	15.913	51.5033	21.5908	27.5247	26.5616	29.2417
SGPP2	22.0334	40.6605	8.63631	47.8061	9.96059	29.2417
KCNK3	25.7056	28.4623	19.4317	36.2168	26.5616	27.9126
SERTM1	18.3611	27.107	23.7498	49.2548	9.96059	27.5803
ATP2B2	15.913	55.5693	15.1135	26.0761	9.96059	27.248
NAP1L3	18.3611	39.3051	12.9545	34.7681	26.5616	27.248
ACSL6	7.34445	71.8335	6.47723	14.4867	29.8818	26.9157
VSTM2L	17.1371	37.9498	15.1135	39.1141	16.601	26.9157
ADGRG2	20.8093	50.1479	19.4317	17.384	13.2808	26.2511
CAMK2A	19.5852	25.7516	12.9545	44.9088	23.2414	26.2511
KCND1	25.7056	27.107	21.5908	30.4221	23.2414	26.2511
CORO2A	22.0334	28.4623	12.9545	40.5628	16.601	25.9188
ERC2	20.8093	35.2391	10.7954	28.9734	33.202	25.9188
POU4F1	15.913	29.8177	10.7954	44.9088	23.2414	25.9188
PPEF1	14.6889	36.5944	10.7954	39.1141	23.2414	25.9188
SYT9	18.3611	23.0409	19.4317	44.9088	19.9212	25.9188
TMEM151A	17.1371	39.3051	28.068	28.9734	6.64039	25.9188
SPTBN4	19.5852	33.8837	17.2726	37.6654	6.64039	25.5865
AMIGO1	22.0334	35.2391	8.63631	37.6654	6.64039	25.2542
SCN3B	18.3611	20.3302	12.9545	50.7035	16.601	25.2542
SLC17A6	19.5852	32.5284	6.47723	39.1141	16.601	24.9219
DISP2	14.6889	31.173	17.2726	33.3194	23.2414	24.2574
GPR161	26.9297	23.0409	19.4317	23.1787	26.5616	23.9251
CLCN4	18.3611	50.1479	10.7954	13.038	16.601	23.5928
NECTIN1	9.7926	18.9749	6.47723	55.0495	23.2414	23.2605
PTGIR	14.6889	18.9749	15.1135	42.0115	16.601	22.2636
SCN10A	14.6889	21.6856	6.47723	42.0115	23.2414	22.2636
SLC24A2	8.56853	36.5944	19.4317	24.6274	19.9212	21.9313
CTNNA2	14.6889	44.7265	8.63631	20.2814	6.64039	21.599
SCN8A	15.913	39.3051	12.9545	21.7301	6.64039	21.599
CAP2	26.9297	24.3963	10.7954	17.384	16.601	20.6021
VSTM2B	9.7926	44.7265	8.63631	18.8327	13.2808	20.6021
ATP2B3	7.34445	35.2391	12.9545	23.1787	19.9212	19.9376
GABBR2	18.3611	24.3963	8.63631	30.4221	6.64039	19.9376
SPIRE2	15.913	23.0409	12.9545	28.9734	13.2808	19.9376
CPNE4	22.0334	32.5284	8.63631	13.038	13.2808	19.6053
SLC7A14	15.913	17.6195	10.7954	33.3194	16.601	19.6053
ARHGAP44	13.4648	23.0409	6.47723	23.1787	36.5222	19.273
INSYN1	13.4648	24.3963	12.9545	23.1787	23.2414	19.273
MAGEE1	12.2408	24.3963	10.7954	27.5247	16.601	18.9407
PTPRT	15.913	9.48745	10.7954	40.5628	9.96059	18.6084
ECE2	12.2408	14.9088	8.63631	36.2168	16.601	18.2761
KIAA0319	14.6889	18.9749	6.47723	30.4221	16.601	18.2761
KCNQ2	11.0167	23.0409	19.4317	24.6274	6.64039	17.9438
IL31RA	9.7926	18.9749	4.31815	26.0761	36.5222	17.6115
KCNS1	11.0167	43.3712	4.31815	4.34601	16.601	16.9469
NTNG2	12.2408	27.107	17.2726	8.69202	23.2414	16.9469
ASIC1	14.6889	18.9749	15.1135	17.384	16.601	16.6146
BICDL1	9.7926	27.107	8.63631	23.1787	6.64039	16.6146
OPCML	18.3611	23.0409	10.7954	15.9354	6.64039	16.6146
PDIA2	13.4648	14.9088	10.7954	27.5247	13.2808	16.6146
GABRA2	13.4648	29.8177	2.15908	15.9354	13.2808	16.2823
MAP3K9	12.2408	29.8177	4.31815	11.5894	13.2808	15.2855
PCLO	9.7926	20.3302	8.63631	21.7301	13.2808	15.2855
TAFA3	9.7926	24.3963	8.63631	17.384	13.2808	15.2855
RYR2	7.34445	20.3302	6.47723	26.0761	9.96059	14.9532
SCRT1	3.67223	33.8837	15.1135	13.038	3.3202	14.9532
FNDC5	12.2408	18.9749	6.47723	20.2814	9.96059	14.6209
CPNE9	12.2408	17.6195	2.15908	21.7301	13.2808	14.2886
DRGX	3.67223	23.0409	12.9545	23.1787	3.3202	14.2886
ASIC3	17.1371	14.9088	10.7954	14.4867	6.64039	13.9563
KCTD16	13.4648	14.9088	0	23.1787	13.2808	13.9563
LANCL3	7.34445	23.0409	10.7954	14.4867	13.2808	13.9563
RTN4RL2	9.7926	21.6856	15.1135	10.1407	6.64039	13.2917
KCNT1	12.2408	20.3302	0	15.9354	9.96059	12.9594
KCTD8	6.12038	18.9749	4.31815	17.384	19.9212	12.9594
TRAPPC3L	7.34445	20.3302	12.9545	7.24335	23.2414	12.9594
KCNB1	6.12038	23.0409	10.7954	8.69202	16.601	12.6271
SPHKAP	8.56853	10.8428	6.47723	18.8327	23.2414	12.6271
HOXD1	7.34445	23.0409	4.31815	14.4867	6.64039	12.2948
TTBK1	6.12038	21.6856	2.15908	15.9354	9.96059	11.9625
LPAR3	2.44815	17.6195	10.7954	11.5894	23.2414	11.6302
MPPED2	3.67223	18.9749	2.15908	18.8327	9.96059	11.2979
CACNA2D2	7.34445	12.1981	4.31815	17.384	3.3202	9.96878
GPC5	2.44815	20.3302	2.15908	8.69202	19.9212	9.96878
TMEM178B	3.67223	13.5535	2.15908	18.8327	6.64039	9.63649
GFRA2	4.8963	8.1321	2.15908	20.2814	9.96059	9.30419
VSTM2A	4.8963	12.1981	6.47723	13.038	9.96059	9.30419
SEPTIN5	4.8963	9.48745	10.7954	14.4867	0	8.63961
TRIM67	4.8963	5.4214	6.47723	18.8327	6.64039	8.63961
FRMPD3	6.12038	6.77675	12.9545	10.1407	3.3202	7.97502
MCF2L2	8.56853	9.48745	2.15908	11.5894	3.3202	7.97502
SLITRK3	3.67223	12.1981	2.15908	8.69202	3.3202	6.64585
OPRM1	7.34445	4.06605	6.47723	8.69202	3.3202	6.31356
CDH18	0	13.5535	4.31815	1.44867	0	4.3198
KCNA4	6.12038	1.35535	2.15908	2.89734	3.3202	3.32293
KCNB2	1.22408	5.4214	4.31815	4.34601	0	3.32293
SCN1A	3.67223	4.06605	0	2.89734	3.3202	2.99063
RGS7BP	2.44815	2.7107	2.15908	0	6.64039	2.32605
SOGA3	1.22408	4.06605	0	1.44867	6.64039	2.32605
SLC38A11	0	0	2.15908	0	0	0.332293
SLC7A13	0	0	0	0	0	0
TSPO2	0	0	0	0	0	0

## Sheet: no_neuronal_genes
Gene	Cluster0 (CPM)	Cluster1 (CPM)	Cluster2 (CPM)	Cluster3 (CPM)	Cluster4 (CPM)	All Nodules (CPM)
TMSB10	6115.82	6169.43	6514.03	6684.44	5399.49	6244.55
APOD	7082.87	4717.18	12926.5	4194.79	11182.1	7212.17
FTH1	6128.61	5508.67	5586.83	5351.66	5799.15	5683.29
S100A6	5808.75	4268.43	4788.45	4972.88	4611.2	4959.37
VIM	6153.13	4055.24	5332.8	3414.12	6430.33	4927.18
GAPDH	2727.38	3961.01	2331.62	4279.53	2340.05	3272.72
FTL	4484.51	3655.96	6085.81	3421.83	4886.83	4340.06
ACTB	3884.23	3533.46	3895.72	3447.51	3607.93	3673.91
TUBA1B	2079.12	3445.13	1696.55	3973.94	2295.95	2798.54
ACTG1	2643.15	3127.12	2589.28	3581.04	2728.69	2971.54
TMSB4X	2858.53	3373.28	3032.02	3139.35	3561.07	3147.71
B2M	3748.82	2847.97	3921.12	2813.22	4159.18	3389.68
CD74	4898.2	3012.87	4109.83	2910.8	3927.65	3767.31
EEF1A1	3502.52	2816.17	4588.85	2497.35	4760.04	3413.25
CST3	3355.38	2209.59	3113.67	2151.96	2408.96	2669.5
GPX3	3080.3	2041.16	4309.42	1836.1	3018.09	2736.46
APOE	2472.56	2400.4	1868.93	2092.9	1896.3	2214.29
TUBB3	1194.16	2412.18	1001.6	2576.96	1358.83	1787.52
HLA-B	2828.67	2110.66	2883.23	2168.65	2756.25	2506.84
PTGDS	2088.72	2223.73	1814.49	2060.8	1948.67	2057.38
UBC	1957.57	1935.16	1760.06	2004.3	1799.83	1914.83
MT3	1957.57	2055.3	1366.31	1735.95	1780.54	1819.71
CD81	2198.54	1791.47	1887.07	1825.83	1764	1921.16
FCGBP	2316.89	1865.67	2208.24	1657.63	1780.54	1986.11
TPT1	1782.71	1631.28	2467.71	1450.91	2389.67	1843.28
S100B	1777.38	1912.78	1135.87	1576.74	1273.39	1611.36
IFITM3	2293.43	1481.7	2582.02	1349.47	1921.11	1890.98
SPP1	1511.89	2166.01	1219.34	1002.79	1645.48	1525.14
CTSD	1285.86	1584.17	1271.96	1390.56	1262.36	1377.43
CD59	1724.07	1687.82	1402.6	1459.89	1590.36	1591.24
MT2A	2164.42	1456.97	1861.67	1394.41	1681.31	1721.14
ANXA2	1181.37	1425.16	1075.99	1667.9	1240.31	1339.21
CTSB	1266.66	1539.41	1703.81	1230.06	1298.19	1397.54
MYL6	1314.64	1376.87	1464.3	1244.18	1248.58	1330.87
PMP22	1756.06	1235.53	1437.08	1250.6	1827.39	1472.84
SERPINA3	1615.32	1656.02	1506.03	943.731	1752.97	1471.98
ITM2B	1414.87	1306.2	1203.01	1250.6	1096.99	1284.89
SPARC	1708.08	1242.6	1389.9	1138.9	1502.16	1395.25
GSN	1686.75	1122.46	1633.04	1188.97	1507.67	1410.48
C1QB	1458.58	1262.62	1943.32	1052.87	1295.44	1379.73
TUBB	943.601	1170.75	780.232	1432.93	840.656	1071.94
SERF2	1263.47	1182.53	1467.93	1160.72	1044.62	1230.29
HSPB1	1131.26	1177.82	1083.25	1262.16	1108.01	1161.89
ATP5F1E	1039.56	1209.62	992.528	1201.81	1204.48	1127.12
SELENOW	1011.84	1130.71	923.577	1233.91	807.581	1055.27
GNAS	940.403	1077.71	821.966	1412.39	917.831	1058.43
HLA-DRA	1649.44	1044.73	1471.55	988.67	1549.01	1315.35
LPL	1230.41	1135.42	707.652	1133.76	986.737	1077.4
MIF	969.191	1197.84	1003.41	1077.27	956.418	1053.26
LGI4	1958.64	1023.53	1331.84	1159.44	1088.72	1361.62
HLA-A	1190.96	928.123	1253.81	1047.73	1237.56	1109.59
TPI1	686.643	1061.22	658.661	954.002	691.818	833.986
IGFBP7	1276.26	889.255	2028.6	735.725	1430.49	1196.09
CD63	1095	1003.5	1108.66	901.359	1025.32	1024.23
ATP1A1	670.65	1179	555.235	898.791	570.543	817.03
CFL1	830.582	934.013	831.038	883.383	939.881	879.105
SCD	957.462	1002.33	517.131	951.434	873.731	888.589
FAU	1064.08	926.946	1259.26	857.703	972.956	1005.84
UBA52	876.43	844.498	1037.89	873.111	948.149	900.946
HLA-C	1080.08	868.055	932.65	934.743	724.893	935.432
CAPNS1	648.26	833.898	651.403	961.706	680.793	767.6
OAZ1	760.212	836.253	740.313	978.398	727.65	821.054
C1QA	1017.17	838.609	1406.23	681.797	1105.26	969.343
HINT1	604.545	929.301	528.018	820.468	507.15	709.836
SPTAN1	535.241	892.789	424.591	838.444	476.831	666.729
UQCR11	663.187	818.586	667.734	848.715	584.325	735.126
C3	947.866	946.969	896.36	752.416	837.9	884.278
PEBP1	734.623	839.787	502.615	900.075	631.181	749.783
TIMP2	848.708	747.917	671.363	983.534	870.974	828.526
A2M	936.138	871.588	1317.32	579.078	1008.79	908.418
EIF1	846.576	752.628	841.925	817.9	757.968	807.259
ATP5ME	669.584	758.517	616.928	783.232	655.987	706.963
COX7C	487.261	813.875	486.284	737.009	509.906	625.058
SERPING1	992.647	687.848	1184.86	627.87	964.687	864.161
NDRG2	1128.06	699.626	716.725	816.616	664.256	840.308
EEF2	721.828	670.181	894.545	730.589	647.718	730.815
PTMA	832.715	618.356	1141.32	490.483	1276.14	798.925
RACK1	722.895	676.07	1025.19	617.598	851.681	749.208
SEMA3B	1389.28	674.892	965.311	652.265	700.087	911.005
SKP1	562.962	678.425	440.922	744.713	548.493	610.977
SH3BGRL3	471.268	636.024	533.461	703.625	526.443	579.077
LDHA	497.923	657.224	486.284	720.317	465.806	581.376
CD99	735.689	709.049	567.936	824.32	471.318	694.892
H3F3B	1041.69	585.377	1036.08	606.042	727.65	799.213
CRYAB	1141.92	626.601	776.603	740.861	851.681	838.297
AHNAK2	335.858	718.471	299.391	607.326	366.581	487.402
GLUL	760.212	571.243	1056.04	602.19	926.099	742.885
AKAP12	496.857	627.779	395.56	738.293	554.006	572.755
APP	599.214	633.668	504.429	757.552	482.343	615.862
SPARCL1	588.551	617.179	894.545	495.619	884.756	654.084
TOMM7	741.02	691.381	609.67	595.77	653.231	666.442
ELOB	633.332	652.513	653.218	644.562	625.668	642.876
AHNAK	1008.64	528.842	974.383	612.462	898.537	785.993
TXNIP	882.827	548.865	1293.73	500.755	942.637	787.142
PFN1	618.405	650.158	762.087	564.954	675.281	642.876
HLA-DRB1	951.065	628.957	843.739	573.942	782.775	753.519
SPTBN1	710.1	625.423	546.163	631.722	644.962	639.14
PGAM1	395.566	663.114	371.971	611.178	402.412	506.082
TXN	383.838	780.896	348.383	582.93	424.462	523.9
GPI	349.719	587.733	328.423	676.661	374.85	480.217
COX6C	465.937	591.266	401.003	649.697	427.219	523.325
IFITM2	868.966	524.131	1036.08	529.003	738.675	721.619
TAGLN2	508.585	489.974	500.8	731.873	501.637	552.063
EEF1G	632.266	610.112	740.313	518.731	724.893	628.22
ANXA6	393.434	581.844	364.713	615.03	344.531	479.355
NDRG1	911.615	583.022	774.789	606.042	531.956	701.79
ATP6V0B	426.487	573.599	444.551	598.338	418.95	502.921
ADIRF	820.987	537.087	747.571	522.583	785.531	669.603
RHOA	646.127	532.375	644.145	532.855	755.212	604.079
DCN	546.969	438.15	1199.38	400.604	934.368	631.381
FADS2	648.26	577.133	366.528	629.154	512.662	567.869
UQCRQ	429.685	566.532	462.696	535.423	399.656	488.839
C1R	809.258	542.976	894.545	442.976	727.65	667.304
PLP1	791.132	522.953	479.026	529.003	595.35	597.182
MIA	769.808	591.266	671.363	442.976	647.718	624.771
FASN	448.877	558.287	303.02	635.574	330.75	481.942
S100A13	453.142	459.35	371.971	649.697	507.15	491.425
PGK1	387.037	502.93	375.6	535.423	405.169	448.605
SRP14	502.188	550.043	500.8	581.646	424.462	523.325
GABARAP	551.234	460.528	553.421	503.323	603.618	524.187
STMN1	470.201	422.838	330.238	594.486	537.468	471.308
NGFR	411.559	508.819	381.044	509.743	308.7	441.708
C1S	782.603	488.796	787.49	444.26	573.3	614.138
EDF1	408.361	440.505	401.003	549.546	352.8	440.846
COX5B	391.301	554.754	482.655	475.075	383.119	463.549
IFI27	657.855	507.641	787.49	476.359	518.175	586.549
APOC1	556.565	544.154	361.084	458.383	479.587	492.575
GUK1	420.089	504.108	353.826	502.039	369.337	443.145
CSRP1	598.147	498.219	533.461	444.26	542.981	523.325
HLA-DRB5	816.722	494.685	655.032	432.704	633.937	607.528
MORF4L1	394.5	508.819	424.591	413.444	545.737	447.168
HLA-E	619.472	494.685	740.313	449.395	578.812	565.857
CD9	774.073	446.394	482.655	463.519	650.475	565.57
C1QC	553.366	534.731	753.015	416.012	542.981	548.614
TSC22D3	520.314	429.905	453.623	496.903	556.762	486.252
MAP1LC3A	318.799	451.106	303.02	559.818	278.381	398.313
CD151	432.884	427.549	426.406	464.803	369.337	431.075
VAT1L	220.707	471.129	150.603	577.794	294.919	358.367
GSTP1	469.135	458.173	540.719	459.667	452.025	473.895
UQCR10	362.514	489.974	366.528	453.247	355.556	413.832
ATP5MD	389.169	458.173	321.165	520.015	369.337	422.453
PPP2R1A	302.805	448.75	319.351	507.175	278.381	384.231
CKB	438.215	533.553	339.31	422.432	355.556	433.661
NDUFA13	448.877	424.016	435.478	431.42	443.756	436.248
DYNLL1	437.149	454.639	342.939	467.371	471.318	436.822
GRINA	385.97	513.53	342.939	392.9	388.631	412.107
MPZ	633.332	421.66	593.339	418.58	540.225	517.577
TLE5	437.149	459.35	457.252	481.495	355.556	447.168
COX6B1	396.632	465.24	284.875	423.716	281.137	389.692
COX7A2	401.964	477.018	344.754	484.063	333.506	422.453
RNASEK	395.566	458.173	317.536	466.087	377.606	412.395
CANX	440.347	413.415	422.777	416.012	487.856	430.5
NDUFS5	353.984	472.306	315.722	414.728	366.581	391.703
S100A11	567.227	413.415	569.751	464.803	504.393	500.621
EIF4A1	481.93	369.836	577.009	442.976	454.781	458.089
NACA	455.274	405.171	491.728	382.628	509.906	438.259
UBL5	394.5	419.304	417.333	448.112	341.775	410.671
MAPK3	323.064	426.371	246.771	502.039	311.456	375.035
NDUFA1	326.262	462.884	301.206	462.235	253.575	378.484
KIF3C	244.164	432.261	185.078	481.495	245.306	333.939
GNB1	368.911	459.35	330.238	508.459	286.65	407.509
TIMP1	568.293	388.681	763.902	336.405	471.318	493.437
UQCRB	303.872	438.15	348.383	391.616	407.925	374.173
PPDPF	522.446	394.57	408.261	472.507	421.706	451.479
CD14	564.028	436.972	704.023	414.728	496.125	514.703
EIF4G2	371.043	367.48	377.415	450.679	380.362	389.979
DSTN	249.495	402.815	313.907	431.42	350.044	348.308
MLLT11	218.574	359.236	150.603	558.534	234.281	319.857
PLTP	524.578	350.991	1074.18	273.489	471.318	507.519
GTF2I	404.096	434.616	371.971	432.704	407.925	413.257
KIF1A	261.223	402.815	232.255	485.347	314.212	346.871
HMGCS1	231.369	426.371	163.304	544.411	319.725	347.446
TMA7	443.546	440.505	426.406	436.556	421.706	436.248
GPX4	479.797	440.505	482.655	353.096	344.531	428.201
DBI	479.797	461.706	402.818	425	410.681	443.72
CALR	505.387	439.327	642.331	369.788	454.781	475.332
FDPS	281.481	381.614	223.183	498.187	286.65	345.722
BEX3	294.276	403.993	273.989	451.963	275.625	351.182
PFDN5	437.149	379.259	537.09	376.208	391.387	420.442
TIMP3	493.658	408.704	486.284	426.284	421.706	449.18
PCBP2	388.103	409.882	381.044	353.096	479.587	394.002
MAPK8IP1	232.435	349.813	270.36	458.383	264.6	321.007
TMEM176B	454.208	398.104	295.762	433.988	316.969	396.589
CIRBP	533.108	391.037	424.591	401.888	275.625	425.04
ATP5MF	303.872	475.84	275.803	404.456	261.844	359.516
PEA15	296.408	336.857	275.803	521.299	281.137	351.757
SLC25A3	283.614	398.104	317.536	331.269	341.775	333.652
STAB1	570.426	333.324	782.047	368.504	322.481	475.044
C4orf48	292.143	431.083	259.473	425	305.944	352.044
IDS	285.746	359.236	212.296	460.951	333.506	336.238
MAP4	359.315	366.303	292.133	441.692	311.456	363.827
SELENOM	521.38	371.014	428.22	364.652	474.075	429.925
CD163	432.884	327.434	782.047	291.465	540.225	441.995
DDX5	541.638	363.947	440.922	466.087	369.337	447.456
SELENOP	484.062	358.058	562.493	305.589	576.056	435.385
MBP	460.605	347.457	459.067	396.752	498.881	422.453
RHOQ	291.077	399.282	192.336	487.915	336.262	350.607
MZT2B	403.03	405.171	399.189	394.184	350.044	395.439
PSMD8	295.342	418.127	205.038	408.308	228.769	329.341
CHL1	539.505	310.945	364.713	459.667	509.906	435.098
HSPA12A	310.269	428.727	259.473	342.825	267.356	333.939
COPS9	348.653	398.104	317.536	425	283.894	366.126
RTL8C	275.084	360.413	223.183	444.26	286.65	326.755
MYL12B	324.13	375.725	328.423	453.247	341.775	368.138
ABCA8	582.154	376.903	428.22	382.628	476.831	452.054
PLEC	495.791	369.836	420.962	351.812	413.437	412.395
HNRNPA2B1	507.519	342.746	498.986	372.356	396.9	424.178
FABP7	411.559	498.219	161.49	354.38	377.606	376.759
ATP5MPL	277.216	406.348	266.731	403.172	305.944	338.25
EPB41L3	167.396	380.436	165.119	419.864	195.694	278.474
CYB5R3	314.534	372.192	297.577	377.492	319.725	340.549
TECR	254.826	432.261	295.762	273.489	305.944	314.11
IGFBP4	453.142	362.769	765.716	261.933	482.343	440.846
ANXA5	426.487	371.014	357.455	362.084	413.437	386.243
MGST3	301.739	458.173	254.029	403.172	234.281	348.021
SAT1	400.897	329.79	431.849	363.368	366.581	376.472
MTCH1	328.395	361.591	324.794	442.976	305.944	359.229
FOS	448.877	313.301	451.809	351.812	388.631	388.255
HLA-DPB1	530.976	381.614	464.51	297.885	509.906	429.638
EZR	396.632	368.658	292.133	374.924	330.75	361.528
CRIP2	309.203	346.28	366.528	326.133	292.162	329.341
YWHAE	323.064	343.924	268.545	427.568	385.875	349.458
EEF1D	495.791	356.88	584.267	294.033	407.925	421.591
LAPTM5	479.797	336.857	524.389	350.528	391.387	413.832
BSG	381.705	379.259	370.157	303.021	350.044	358.367
DST	345.454	323.901	201.409	382.628	418.95	333.364
NDUFA11	357.182	335.679	317.536	372.356	316.969	344.86
SQSTM1	433.95	373.369	384.673	324.849	322.481	375.322
RARRES2	544.837	358.058	430.035	380.06	289.406	417.568
CADM3	380.639	372.192	288.504	390.332	275.625	355.206
NDUFB2	312.401	334.501	292.133	353.096	322.481	324.743
ATP13A2	202.581	360.413	177.82	401.888	170.887	278.474
POLR2L	327.328	322.723	379.229	423.716	344.531	357.792
CLSTN1	304.938	348.635	243.142	342.825	242.55	307.787
HSP90B1	429.685	349.813	524.389	331.269	435.487	403.773
HLA-DPA1	424.354	330.968	457.252	350.528	424.462	390.266
COX8A	330.527	367.48	292.133	362.084	283.894	335.664
ITGB4	614.141	343.924	509.873	346.677	402.412	449.755
CLIC4	589.618	335.679	406.447	317.145	496.125	427.914
NPC2	395.566	330.968	386.487	309.441	429.975	362.678
RNASE1	358.249	263.832	832.852	249.094	429.975	393.428
TUBB4A	186.588	328.612	159.675	413.444	226.012	271.864
MXRA7	256.958	293.278	215.925	462.235	286.65	308.362
OLFM1	239.899	362.769	174.191	385.196	206.719	288.533
MARCKS	449.943	371.014	404.632	335.121	512.662	404.348
NEDD8	292.143	330.968	272.174	394.184	272.869	319.283
GABARAPL2	266.554	322.723	192.336	421.148	187.425	294.855
TALDO1	378.507	358.058	317.536	341.541	286.65	346.009
ATP6V0A1	229.237	333.324	226.812	355.664	226.012	282.21
HNRNPK	401.964	341.568	397.374	359.516	305.944	366.988
EIF4A2	269.753	312.123	244.957	367.22	327.994	304.051
INSIG1	151.403	338.035	119.757	431.42	267.356	266.692
NAA38	293.209	349.813	292.133	320.997	275.625	311.236
LGALS3	541.638	333.324	495.357	299.169	443.756	419.005
LTBP4	642.928	295.633	531.647	326.133	363.825	440.558
QKI	476.599	292.1	402.818	346.677	534.712	396.876
RHOC	464.87	314.478	430.035	337.689	322.481	379.346
MYL9	455.274	276.788	656.847	255.513	429.975	396.301
CNN3	457.407	314.478	508.058	255.513	496.125	389.404
BCAP31	264.422	339.213	244.957	300.453	231.525	284.222
WBP2	259.091	336.857	215.925	368.504	283.894	298.304
TSPAN3	275.084	348.635	246.771	328.701	297.675	302.902
ID3	552.3	293.278	671.363	259.365	366.581	423.028
SLC44A2	476.599	316.834	315.722	372.356	239.794	364.114
COX7B	203.647	363.947	224.997	272.205	275.625	268.991
IFI27L2	344.388	308.589	303.02	291.465	267.356	309.224
HSPG2	617.339	266.188	558.864	320.997	350.044	428.201
ATP6AP1	293.209	318.012	232.255	372.356	303.187	308.362
S100A4	373.176	342.746	489.913	295.317	407.925	370.437
RGCC	508.585	360.413	261.287	368.504	292.162	379.346
NCAM1	344.388	292.1	212.296	382.628	292.162	313.822
HAMP	436.082	353.346	304.835	349.245	281.137	359.516
LAMP1	441.414	302.7	373.786	310.725	305.944	353.481
PLPP1	425.42	307.411	283.061	317.145	327.994	339.687
PABPC1	302.805	294.455	433.664	260.649	749.7	358.654
TMBIM6	378.507	310.945	382.858	292.749	424.462	348.308
GNB2	384.904	340.39	373.786	335.121	294.919	351.757
GABARAPL1	213.243	368.658	110.684	297.885	181.912	250.598
CCDC92	172.727	306.234	168.748	376.208	170.887	250.023
CEBPD	481.93	299.167	475.397	290.181	394.144	384.231
PARK7	310.269	299.167	277.617	313.293	272.869	299.166
SLC38A2	282.547	297.989	321.165	300.453	286.65	296.867
TSPO	355.05	285.033	397.374	274.773	358.312	327.042
TMEM233	163.131	247.343	114.313	426.284	212.231	239.965
SLC25A6	308.137	308.589	370.157	320.997	311.456	321.294
CDH19	474.466	296.811	313.907	336.405	427.219	369.862
NPDC1	300.673	287.388	335.681	308.157	192.937	293.418
SUN2	380.639	310.945	344.754	326.133	339.019	341.411
GPC1	577.889	277.966	390.116	286.329	347.287	385.668
JUND	313.468	310.945	283.061	340.257	245.306	306.925
VWA1	568.293	295.633	406.447	308.157	350.044	395.152
RHOB	325.196	262.654	424.591	304.305	245.306	312.673
NDUFA3	285.746	355.702	263.102	301.737	286.65	302.902
AQP1	288.945	266.188	488.099	229.834	292.162	302.04
DYNLRB1	291.077	327.434	266.731	304.305	314.212	301.465
CLIP3	256.958	280.322	194.151	358.232	187.425	268.128
PINK1	199.382	305.056	214.11	333.837	209.475	258.645
P4HB	410.493	296.811	391.931	272.205	358.312	343.423
HSBP1	265.488	252.054	290.319	345.393	250.819	282.498
OST4	315.6	293.278	330.238	285.045	305.944	304.626
GPM6B	457.407	314.478	326.609	303.021	512.662	373.023
CHCHD10	272.951	380.436	228.626	264.501	206.719	283.36
PRIMA1	488.327	313.301	277.617	344.109	275.625	357.792
MAP2K2	255.892	285.033	210.481	315.861	214.987	264.967
COX5A	198.316	382.792	190.522	252.945	201.206	254.621
DDX17	415.824	269.721	390.116	305.589	292.162	338.537
LAMTOR4	327.328	310.945	333.867	305.589	214.987	307.787
HNRNPA1	350.785	289.744	424.591	254.229	391.387	330.203
HSPA5	375.308	332.146	379.229	300.453	303.187	341.124
PCBP1	303.872	314.478	313.907	261.933	374.85	306.063
ARPC1B	355.05	299.167	381.044	291.465	369.337	332.79
CTNNA1	438.215	297.989	310.278	299.169	300.431	338.25
CNP	397.699	313.301	313.907	282.477	303.187	328.192
PTGES3	251.627	294.455	232.255	285.045	250.819	266.404
GNAI2	383.838	272.077	393.745	274.773	372.094	332.502
TMEM258	352.918	279.144	310.278	290.181	292.162	307.787
COL1A2	400.897	274.432	395.56	317.145	429.975	353.481
RAC1	263.355	283.855	290.319	282.477	330.75	283.935
TSPAN8	269.753	287.388	154.232	332.553	259.087	268.703
NDUFB1	260.157	300.345	263.102	290.181	267.356	277.9
ARF1	286.812	310.945	270.36	272.205	272.869	285.371
VCP	214.309	279.144	246.771	300.453	140.569	246.862
ATF4	366.778	256.765	270.36	344.109	206.719	302.902
FIS1	264.422	292.1	281.246	287.613	267.356	279.336
NFE2L1	229.237	309.767	235.884	338.973	190.181	270.428
SNX3	267.62	285.033	279.432	260.649	250.819	270.428
C9orf16	222.839	299.167	210.481	342.825	253.575	269.565
PTMS	336.924	233.209	370.157	279.909	366.581	307.213
ATP5MG	244.164	290.922	272.174	265.785	239.794	264.393
MRFAP1	246.296	280.322	214.11	272.205	311.456	262.093
MT1E	509.651	288.566	401.003	236.254	333.506	358.942
FLNA	419.023	276.788	509.873	250.377	330.75	351.757
NDUFB7	248.428	305.056	293.948	277.341	256.331	276.75
PSMC5	230.303	299.167	252.215	323.565	223.256	270.715
FAIM2	163.131	314.478	159.675	291.465	140.569	225.883
IFI6	328.395	236.742	381.044	261.933	361.069	302.902
DUSP1	293.209	223.786	335.681	256.797	314.212	277.037
CAPZB	278.282	288.566	248.586	291.465	209.475	271.864
RAN	227.104	297.989	214.11	281.193	228.769	254.621
VMP1	597.081	255.587	433.664	276.057	297.675	384.806
SRRM2	468.069	236.742	328.423	315.861	256.331	333.364
PSMB7	207.912	287.388	170.562	264.501	201.206	233.355
EXTL1	433.95	268.543	283.061	314.577	231.525	321.869
EEF1B2	253.759	255.587	370.157	264.501	361.069	286.234
HCFC1R1	269.753	302.7	228.626	291.465	248.062	273.876
PRKAR1A	220.707	269.721	226.812	279.909	278.381	252.897
SOD2	318.799	288.566	304.835	240.106	316.969	291.407
CAP1	270.819	295.633	250.4	283.761	264.6	275.888
ACADVL	306.004	269.721	301.206	258.081	209.475	275.6
SAMHD1	374.242	308.589	295.762	255.513	427.219	324.743
LAMTOR1	229.237	246.165	266.731	279.909	253.575	253.185
SERINC3	164.197	269.721	179.635	263.217	201.206	218.411
FLOT1	242.031	268.543	226.812	288.897	228.769	255.196
CLIC1	290.011	302.7	299.391	285.045	231.525	287.383
ADD1	302.805	265.01	283.061	297.885	228.769	281.635
H1FX	328.395	228.497	437.293	277.341	319.725	308.937
ATF3	191.919	277.966	128.829	287.613	179.156	223.009
CDC42	245.23	267.366	230.441	241.39	242.55	247.15
UQCRH	191.919	277.966	217.739	240.106	184.669	227.033
FXYD1	433.95	263.832	330.238	250.377	303.187	321.294
SCRG1	299.607	301.522	203.223	336.405	267.356	289.682
CDC37	256.958	254.409	234.07	268.353	220.5	251.46
SEPTIN7	236.7	290.922	176.006	273.489	270.112	252.035
FN1	532.042	239.098	446.365	218.278	366.581	359.516
MICALL2	468.069	256.765	266.731	322.281	231.525	327.329
FADS3	372.109	230.853	263.102	296.601	198.45	285.371
NDUFV1	254.826	290.922	243.142	222.13	170.887	245.713
MAGED1	210.045	269.721	185.078	272.205	275.625	241.402
STXBP1	158.866	266.188	139.716	288.897	162.619	211.514
MVD	201.515	274.432	136.087	328.701	146.081	231.631
PPA1	182.323	279.144	239.513	213.142	248.062	228.757
HEBP2	153.535	323.901	116.128	287.613	146.081	218.411
INF2	360.381	273.255	281.246	300.453	256.331	302.327
DNAJA1	165.264	265.01	176.006	265.785	212.231	218.699
MAP7D1	194.051	274.432	188.707	252.945	198.45	226.458
ATOX1	258.024	250.876	223.183	323.565	181.912	257.495
PSMB3	212.177	254.409	228.626	232.402	294.919	238.241
TMOD1	162.065	262.654	110.684	329.985	137.812	213.526
CCNI	223.905	259.121	186.893	301.737	333.506	255.484
WARS	217.508	273.255	195.965	283.761	212.231	241.977
ZFAND5	260.157	226.142	228.626	261.933	270.112	248.299
SNRPD2	248.428	266.188	272.174	245.242	206.719	251.46
PRXL2A	234.568	255.587	163.304	261.933	305.944	241.977
ENTPD6	204.714	267.366	128.829	276.057	168.131	220.136
PSMB1	271.885	257.943	219.554	261.933	239.794	254.621
ATP5PF	230.303	244.987	219.554	251.661	259.087	239.965
TKT	192.985	279.144	217.739	283.761	206.719	239.678
ALDOA	139.674	267.366	137.902	269.637	90.9562	194.558
NPTX2	312.401	228.497	194.151	329.985	237.037	269.278
ROMO1	298.541	259.121	286.69	236.254	195.694	262.381
NAP1L1	220.707	233.209	226.812	264.501	399.656	253.185
ATP5PO	200.449	260.299	206.852	216.994	223.256	222.147
ATP6V1G1	176.992	269.721	163.304	231.118	245.306	216.687
HK1	176.992	253.232	163.304	247.81	212.231	212.951
S100A8	311.335	286.211	531.647	225.982	248.062	314.397
AKR1B1	189.787	227.32	219.554	224.698	242.55	216.974
BTF3	283.614	257.943	299.391	227.266	270.112	265.829
EIF3K	223.905	259.121	261.287	216.994	190.181	233.355
ITGB8	530.976	213.186	348.383	222.13	369.337	338.537
DDIT4	360.381	215.541	321.165	268.353	217.744	283.36
CYSTM1	198.316	234.387	127.015	265.785	234.281	214.675
POMP	204.714	262.654	183.264	268.353	192.937	228.47
S100A9	277.216	223.786	558.864	172.054	336.262	291.407
FKBP5	316.666	222.608	281.246	213.142	358.312	269.278
PLEKHB1	317.732	250.876	176.006	278.625	250.819	263.243
TTYH1	332.659	268.543	188.707	285.045	239.794	273.876
NDUFB11	200.449	255.587	194.151	191.314	226.012	213.526
MICOS13	217.508	260.299	210.481	240.106	201.206	230.194
FABP5	245.23	263.832	186.893	252.945	184.669	235.942
SEC61G	219.641	237.92	188.707	214.426	231.525	219.273
FKBP1A	206.846	237.92	228.626	249.094	206.719	227.32
EIF6	206.846	267.366	176.006	290.181	146.081	229.044
HLA-DQB1	379.573	216.719	350.197	197.734	336.262	289.97
ATP5MC2	263.355	248.52	248.586	256.797	206.719	250.023
PITHD1	173.793	273.255	117.942	256.797	151.594	205.479
ADGRG1	271.885	267.366	219.554	245.242	226.012	251.748
CLTB	157.8	270.899	185.078	232.402	181.912	208.928
TBCA	175.926	261.476	154.232	254.229	261.844	219.848
MT1X	231.369	262.654	241.328	170.77	239.794	227.895
HMGB1	272.951	254.409	270.36	214.426	319.725	259.794
SLC15A3	360.381	266.188	268.545	213.142	267.356	280.199
PRDX6	227.104	208.474	244.957	213.142	203.962	219.848
MYH9	256.958	227.32	379.229	192.598	283.894	257.495
OGFRL1	288.945	243.809	212.296	242.674	239.794	250.311
TSC22D4	254.826	287.388	243.142	224.698	259.087	254.621
JUN	339.057	196.696	250.4	261.933	214.987	260.082
GAS7	355.05	216.719	255.844	234.97	314.212	274.451
CCDC85B	169.528	242.631	203.223	168.202	168.131	192.259
TAPBP	291.077	227.32	277.617	246.526	228.769	256.921
SFRP5	352.918	233.209	250.4	263.217	245.306	276.175
COL18A1	302.805	214.364	348.383	223.414	270.112	267.266
FSTL1	274.018	187.274	297.577	259.365	278.381	253.759
H3F3A	303.872	226.142	348.383	173.338	303.187	262.668
COMMD6	251.627	236.742	339.31	247.81	267.356	262.668
SOX10	412.626	215.541	297.577	255.513	259.087	295.143
TRIR	270.819	212.008	250.4	237.538	187.425	237.091
GRN	246.296	222.608	399.189	196.45	316.969	260.944
CUTA	202.581	222.608	203.223	210.574	195.694	208.64
TXNL4A	153.535	208.474	148.788	309.441	148.837	200.593
UQCRFS1	147.138	262.654	127.015	213.142	179.156	190.248
PGRMC1	228.17	220.253	150.603	242.674	184.669	212.664
NDUFB8	210.045	208.474	195.965	229.834	181.912	208.928
CFH	306.004	171.962	626	137.387	388.631	294.855
ARPP19	169.528	226.142	145.159	242.674	212.231	200.306
LAPTM4A	265.488	204.941	324.794	200.302	366.581	256.058
FDFT1	190.853	210.83	119.757	234.97	209.475	196.283
ADH1B	296.408	175.495	426.406	199.018	385.875	275.026
WDR83OS	234.568	254.409	234.07	228.55	179.156	232.206
FCER1G	306.004	233.209	382.858	213.142	217.744	270.428
GDI2	201.515	209.652	208.667	219.562	239.794	212.664
HNRNPC	274.018	250.876	250.4	231.118	289.406	256.633
LSS	186.588	224.964	143.345	238.822	143.325	196.283
PFKL	285.746	226.142	324.794	234.97	190.181	256.058
TMED10	350.785	235.564	279.432	209.29	278.381	272.152
ARL6IP4	284.68	228.497	261.287	229.834	201.206	246.287
ARPC5	204.714	226.142	217.739	240.106	294.919	229.332
TRAPPC5	229.237	234.387	199.594	234.97	217.744	225.883
SSR4	299.607	208.474	319.351	214.426	226.012	253.759
HDLBP	212.177	229.675	239.513	215.71	214.987	221.86
UBE2D3	219.641	220.253	221.368	234.97	264.6	228.182
RBX1	217.508	233.209	176.006	220.846	220.5	215.825
TRAPPC1	169.528	196.696	181.449	220.846	195.694	192.259
PHC2	368.911	206.119	297.577	209.29	256.331	270.428
TMEM59	214.309	228.497	208.667	231.118	248.062	224.159
NGRN	165.264	228.497	117.942	265.785	159.862	195.133
VPS28	216.442	210.83	228.626	232.402	214.987	220.423
DCXR	275.084	200.23	254.029	210.574	181.912	229.332
PHLDA3	269.753	206.119	257.658	261.933	237.037	247.15
TIMP4	298.541	246.165	148.788	243.958	242.55	243.988
CLTA	207.912	226.142	195.965	225.982	234.281	217.262
C11orf96	184.455	193.163	312.093	241.39	198.45	220.998
NDUFB10	198.316	253.232	219.554	215.71	173.644	216.4
PJA2	159.932	227.32	143.345	258.081	195.694	199.444
DDT	169.528	237.92	141.53	238.822	184.669	198.869
TAGLN	263.355	149.583	624.186	178.474	369.337	284.797
ARL2	242.031	191.985	214.11	209.29	198.45	213.526
SMIM29	215.376	237.92	166.933	232.402	195.694	214.963
PYGB	172.727	250.876	139.716	220.846	135.056	193.409
TYROBP	292.143	219.075	319.351	192.598	203.962	247.15
TUFM	211.111	208.474	230.441	202.87	170.887	207.491
LRP1	329.461	208.474	370.157	224.698	248.062	274.451
ITGB1	232.435	203.763	232.255	231.118	226.012	224.446
CAVIN1	268.687	215.541	312.093	213.142	336.262	257.208
LMNA	337.991	206.119	266.731	205.438	286.65	259.507
EGFL8	321.997	208.474	290.319	224.698	237.037	258.645
SORBS1	308.137	199.052	259.473	211.858	242.55	245.425
JPT1	119.416	234.387	119.757	252.945	137.812	179.327
TRMT112	236.7	216.719	201.409	202.87	212.231	216.112
DAD1	221.773	233.209	230.441	202.87	209.475	220.423
PSMB6	190.853	194.341	188.707	206.722	181.912	193.984
DAG1	311.335	190.807	248.586	199.018	270.112	242.551
BLOC1S1	269.753	209.652	234.07	223.414	220.5	233.93
MCAM	165.264	227.32	210.481	214.426	121.275	193.984
ARPC4	219.641	203.763	237.699	229.834	206.719	219.561
AATK	355.05	190.807	234.07	261.933	176.4	256.346
RPN2	280.415	227.32	243.142	218.278	250.819	244.563
RAB11A	149.27	187.274	165.119	241.39	143.325	181.051
RHBDD2	171.661	237.92	156.046	238.822	129.544	195.995
SNRNP70	321.997	221.43	273.989	231.118	159.862	252.61
CYP51A1	165.264	227.32	159.675	202.87	214.987	193.121
BRI3	206.846	215.541	266.731	209.29	184.669	216.687
NDUFS7	198.316	214.364	170.562	169.486	162.619	187.661
VSIG4	238.832	230.853	319.351	197.734	231.525	239.678
ZNHIT1	203.647	184.918	203.223	193.882	165.375	192.834
RASSF4	293.209	209.652	228.626	241.39	176.4	238.815
IMPDH1	129.012	261.476	123.386	179.758	124.031	171.28
SH3GLB2	187.654	179.029	177.82	238.822	159.862	192.547
MAGED2	213.243	187.274	185.078	246.526	190.181	207.491
SNU13	194.051	213.186	190.522	240.106	184.669	207.491
MFGE8	266.554	240.276	246.771	233.686	168.131	239.39
TLN1	243.097	206.119	246.771	200.302	209.475	221.572
KCTD12	308.137	216.719	252.215	163.066	319.725	245.713
EIF5A	205.78	210.83	197.78	205.438	214.987	206.628
OS9	279.349	162.539	201.409	222.13	250.819	222.722
LPIN1	158.866	200.23	110.684	250.377	176.4	183.638
SREBF2	202.581	208.474	179.635	254.229	176.4	209.215
ANXA1	317.732	199.052	292.133	204.154	261.844	253.472
CSNK1A1	186.588	200.23	194.151	191.314	206.719	194.271
ITGAV	268.687	209.652	190.522	213.142	253.575	227.895
OPTN	178.058	181.385	112.499	211.858	198.45	178.178
FCGRT	254.826	189.629	395.56	193.882	192.937	241.114
MTRNR2L12	90.6284	194.341	141.53	97.583	904.049	210.364
PCBP4	217.508	190.807	174.191	209.29	151.594	195.421
WSB1	347.587	193.163	206.852	227.266	214.987	246.862
AKR1C1	140.741	151.939	123.386	249.094	129.544	163.808
SLC25A1	170.595	188.451	148.788	224.698	137.812	180.189
SERPINB6	266.554	169.606	244.957	237.538	184.669	224.446
UBE2M	181.257	191.985	181.449	219.562	146.081	188.811
RAB1A	189.787	190.807	197.78	222.13	154.35	194.846
HNRNPH1	264.422	186.096	281.246	173.338	195.694	220.423
SERPINF1	249.495	162.539	466.325	151.51	237.037	239.39
EIF1B	119.416	246.165	103.426	190.03	126.787	164.383
MLF2	188.72	224.964	172.377	237.538	184.669	205.479
CTSA	222.839	228.497	168.748	201.586	124.031	200.593
HNRNPU	232.435	191.985	259.473	213.142	256.331	225.021
MTURN	205.78	161.362	188.707	222.13	223.256	197.72
C12orf57	208.978	199.052	301.206	182.326	234.281	217.836
MSMO1	169.528	213.186	110.684	232.402	179.156	185.937
PRKAR1B	113.019	209.652	78.0232	240.106	110.25	159.21
BASP1	78.9	220.253	79.8377	233.686	220.5	162.946
ZFP36L1	279.349	187.274	263.102	161.782	234.281	223.297
SDCBP	157.8	216.719	185.078	169.486	234.281	187.086
NENF	195.118	188.451	206.852	241.39	168.131	202.893
C1orf122	171.661	206.119	154.232	247.81	173.644	194.558
CARHSP1	207.912	191.985	230.441	241.39	195.694	213.813
FEZ1	172.727	210.83	107.055	247.81	190.181	190.248
NDUFB4	195.118	204.941	165.119	186.178	179.156	189.098
CSF1R	228.17	200.23	250.4	183.61	190.181	210.939
IDI1	136.476	204.941	117.942	211.858	173.644	170.993
COL6A1	319.865	188.451	272.174	188.746	190.181	237.378
ATP9A	121.549	186.096	85.2812	229.834	143.325	158.061
CD47	187.654	186.096	168.748	219.562	217.744	194.558
CCM2	129.012	222.608	117.942	233.686	135.056	174.154
ATP6V1F	152.469	168.428	130.644	178.474	176.4	161.222
TCEAL4	196.184	206.119	195.965	232.402	184.669	205.479
PLEKHB2	155.668	177.851	143.345	213.142	170.887	173.579
TPM3	227.104	179.029	205.038	195.166	256.331	207.778
C19orf53	200.449	216.719	156.046	190.03	192.937	194.271
LAMTOR5	187.654	223.786	166.933	177.19	137.812	185.65
FKBP8	167.396	213.186	181.449	196.45	198.45	190.535
XRCC6	162.065	208.474	212.296	199.018	146.081	187.949
BST2	264.422	174.318	413.705	152.794	283.894	243.126
SELENOT	135.409	190.807	143.345	240.106	165.375	176.741
DAZAP2	235.634	193.163	232.255	169.486	226.012	208.928
MORF4L2	184.455	168.428	201.409	232.402	187.425	194.271
MAPK8IP3	180.191	162.539	130.644	215.71	132.3	170.993
SEC61A1	194.051	201.407	194.151	213.142	187.425	199.444
KCNAB2	94.8933	184.918	96.1682	190.03	96.4687	138.519
RUFY3	127.946	240.276	101.612	249.094	121.275	177.603
COX17	176.992	190.807	150.603	270.921	151.594	194.558
ARPC3	204.714	183.74	170.562	205.438	192.937	193.121
SCN7A	310.269	204.941	183.264	182.326	176.4	221.86
FLOT2	191.919	187.274	185.078	218.278	179.156	194.271
SCOC	120.482	209.652	78.0232	205.438	179.156	160.647
NUCB1	214.309	187.274	206.852	193.882	209.475	201.456
MICOS10	170.595	213.186	143.345	215.71	148.837	184.5
NUPR1	291.077	190.807	243.142	216.994	212.231	234.217
POLR2E	152.469	233.209	136.087	169.486	154.35	173.579
PSMD4	160.999	194.341	157.861	208.006	135.056	176.453
PDIA3	211.111	208.474	226.812	173.338	195.694	202.893
BLVRB	170.595	194.341	212.296	157.93	143.325	177.315
TGFBR2	265.488	163.717	317.536	170.77	275.625	228.757
CYBA	246.296	200.23	326.609	187.462	176.4	227.32
PTOV1	217.508	171.962	159.675	249.094	190.181	201.456
RHEB	158.866	190.807	121.571	191.314	143.325	166.395
NCL	198.316	162.539	201.409	178.474	278.381	193.984
PLAC9	206.846	247.343	217.739	168.202	201.206	209.215
SERPINA5	291.077	217.897	161.49	184.894	187.425	218.124
GABBR1	194.051	200.23	192.336	204.154	115.762	189.386
CPLX1	116.218	227.32	78.0232	132.251	79.9312	137.082
DNAJB2	191.919	193.163	146.974	172.054	151.594	176.453
PPIB	260.157	171.962	288.504	181.042	242.55	223.584
TSC22D1	176.992	197.874	215.925	145.091	195.694	183.063
PUF60	202.581	182.562	197.78	209.29	118.519	189.673
SIGIRR	221.773	176.673	197.78	192.598	162.619	194.271
CAPN2	164.197	183.74	145.159	169.486	168.131	167.544
DEPP1	294.276	183.74	328.423	170.77	264.6	241.977
ATP6V1B2	106.622	209.652	70.7652	206.722	132.3	151.164
RAP1GDS1	117.284	164.895	99.7971	191.314	121.275	143.117
VDAC1	130.078	189.629	116.128	195.166	184.669	162.659
METRN	288.945	171.962	188.707	196.45	184.669	212.951
GPX2	76.7676	308.589	72.5797	118.127	74.4187	141.68
SMDT1	146.072	195.518	152.417	187.462	173.644	171.28
ZFP36L2	250.561	181.385	241.328	150.226	259.087	210.652
SRGN	184.455	187.274	306.649	137.387	237.037	199.444
CD99L2	162.065	200.23	121.571	182.326	154.35	168.694
HLA-DMA	274.018	161.362	261.287	165.634	220.5	214.675
EPHX1	151.403	166.073	145.159	173.338	176.4	161.509
KRTCAP2	211.111	162.539	264.916	187.462	201.206	201.456
NDUFS8	154.601	164.895	176.006	174.622	170.887	166.682
CSTB	189.787	193.163	176.006	165.634	203.962	184.5
PSMB2	166.33	186.096	130.644	177.19	151.594	166.395
LTBP3	326.262	157.828	210.481	178.474	187.425	219.273
PPP2CA	145.005	182.562	141.53	160.498	165.375	159.21
ACO2	158.866	186.096	121.571	174.622	143.325	161.509
GFRA1	132.211	186.096	92.5392	205.438	132.3	155.474
MAPRE3	97.0257	195.518	83.4667	183.61	107.494	139.381
ECE1	303.872	182.562	210.481	195.166	181.912	222.435
ZFP36	228.17	164.895	217.739	192.598	176.4	197.72
FAM50A	172.727	163.717	192.336	166.918	184.669	173.579
GLG1	236.7	171.962	203.223	183.61	192.937	199.157
MATN2	287.878	184.918	161.49	184.894	231.525	213.813
APMAP	136.476	183.74	132.458	150.226	124.031	149.152
TMEM259	222.839	171.962	210.481	191.314	126.787	191.397
NBL1	145.005	140.161	130.644	220.846	118.519	155.762
ERBB3	303.872	203.763	203.223	173.338	250.819	228.757
VAPA	149.27	187.274	154.232	159.214	203.962	167.257
YPEL3	199.382	169.606	166.933	183.61	124.031	175.591
NDUFA2	166.33	188.451	157.861	164.35	157.106	168.981
SRSF5	224.972	167.251	215.925	225.982	165.375	203.467
SSU72	165.264	184.918	183.264	141.239	192.937	170.418
ACTR2	159.932	154.295	174.191	161.782	228.769	168.407
AHR	309.203	187.274	237.699	160.498	275.625	231.343
TCF25	172.727	193.163	148.788	181.042	162.619	174.729
PSMC1	137.542	179.029	166.933	192.598	148.837	165.82
WDR1	206.846	180.207	176.006	204.154	157.106	189.673
FUS	228.17	176.673	208.667	199.018	176.4	200.593
CTNNB1	182.323	174.318	243.142	148.943	198.45	184.213
KIF1B	135.409	196.696	79.8377	170.77	146.081	150.589
EMC10	171.661	176.673	148.788	192.598	124.031	168.981
GSTO1	154.601	177.851	223.183	155.362	190.181	175.016
RAB1B	168.462	179.029	188.707	195.166	146.081	177.89
NR4A1	258.024	133.094	281.246	157.93	181.912	200.881
CCT7	138.608	157.828	185.078	196.45	157.106	165.533
JOSD2	170.595	154.295	161.49	192.598	173.644	170.418
VSIR	239.899	164.895	237.699	188.746	181.912	203.755
SOD3	204.714	179.029	179.635	137.387	220.5	181.051
PRMT2	159.932	162.539	145.159	159.214	226.012	164.958
KIAA0930	206.846	169.606	150.603	193.882	104.737	175.304
BRK1	164.197	180.207	150.603	205.438	226.012	181.626
HNRNPDL	203.647	155.472	201.409	184.894	176.4	184.5
VKORC1	165.264	155.472	159.675	213.142	168.131	173.005
TMEM219	175.926	163.717	174.191	192.598	132.3	171.855
CNBP	187.654	181.385	201.409	150.226	157.106	176.741
AP1S2	168.462	187.274	141.53	186.178	192.937	175.304
COTL1	179.124	183.74	177.82	145.091	212.231	175.878
STEAP3	106.622	207.297	130.644	177.19	101.981	150.301
EGFL7	159.932	182.562	263.102	133.535	165.375	176.453
NAP1L4	124.747	154.295	143.345	159.214	135.056	143.692
NDUFS6	153.535	147.228	161.49	187.462	201.206	165.82
ABCA2	272.951	159.006	205.038	191.314	168.131	205.192
PI4KA	150.336	182.562	163.304	172.054	113.006	161.222
OCIAD1	132.211	162.539	128.829	184.894	93.7124	146.853
ECHS1	158.866	180.207	157.861	177.19	124.031	164.383
IGFBP6	148.204	148.406	277.617	125.831	272.869	176.741
RBM3	181.257	150.761	145.159	184.894	137.812	164.383
DDX3X	200.449	151.939	206.852	170.77	151.594	177.89
MCRIP1	183.389	161.362	194.151	196.45	148.837	179.04
ELOVL5	130.078	166.073	119.757	199.018	148.837	154.612
NDUFA10	151.403	186.096	117.942	155.362	104.737	150.589
ST13	150.336	163.717	163.304	170.77	176.4	162.946
SCAND1	168.462	166.073	172.377	155.362	165.375	165.245
ARF3	142.873	162.539	130.644	192.598	146.081	157.199
GADD45GIP1	152.469	171.962	145.159	182.326	113.006	158.636
ARPC2	140.741	193.163	157.861	178.474	192.937	170.131
NOP53	191.919	164.895	321.165	127.115	220.5	194.271
TSPAN7	91.6946	160.184	97.9826	193.882	115.762	134.783
HNRNPA3	228.17	156.65	203.223	161.782	192.937	188.236
PET100	173.793	128.383	195.965	179.758	198.45	170.131
NDUFV2	151.403	199.052	166.933	156.646	118.519	163.234
SEM1	149.27	157.828	159.675	188.746	129.544	159.785
COPE	163.131	194.341	159.675	187.462	113.006	170.418
ATP5MC1	154.601	177.851	139.716	151.51	165.375	158.348
NUCKS1	181.257	162.539	165.119	147.659	250.819	173.867
PLXND1	194.051	162.539	263.102	159.214	162.619	186.224
ZCCHC24	248.428	167.251	255.844	132.251	201.206	198.869
PSME1	235.634	164.895	232.255	173.338	192.937	199.444
TMBIM1	228.17	176.673	246.771	175.906	129.544	196.57
GNG2	191.919	153.117	134.273	201.586	206.719	177.028
ATP2B4	171.661	130.738	114.313	250.377	143.325	167.257
MTPN	119.416	175.495	108.87	169.486	181.912	149.152
WASHC1	231.369	167.251	205.038	183.61	115.762	188.811
FAM20C	184.455	153.117	165.119	182.326	157.106	170.418
FCGR3A	179.124	176.673	194.151	137.387	239.794	177.89
STOM	219.641	162.539	266.731	155.362	226.012	199.444
QDPR	104.489	131.916	90.7247	224.698	107.494	136.22
NPTN	114.085	156.65	121.571	191.314	137.812	145.416
GSTK1	176.992	135.449	143.345	172.054	168.131	159.498
PSMA1	138.608	153.117	145.159	163.066	157.106	150.589
ITGA7	158.866	156.65	127.015	195.166	99.2249	155.187
SREBF1	274.018	168.428	215.925	173.338	223.256	211.227
TOLLIP	110.886	150.761	97.9826	179.758	104.737	133.346
NDUFA6	127.946	181.385	128.829	174.622	132.3	152.026
HIGD1A	107.688	175.495	87.0957	179.758	121.275	138.519
GAS6	159.932	179.029	188.707	114.275	124.031	155.187
ATXN10	108.754	179.029	105.241	191.314	148.837	148.002
SUMO2	182.323	156.65	172.377	152.794	248.062	174.729
AP1B1	149.27	163.717	130.644	157.93	140.569	150.876
B3GAT3	162.065	170.784	125.2	142.523	96.4687	147.14
PTTG1IP	226.038	147.228	221.368	175.906	187.425	190.822
YPEL5	117.284	149.583	103.426	138.671	124.031	128.46
TTL	101.291	163.717	74.3942	177.19	77.175	126.736
TIMM13	171.661	146.05	172.377	160.498	148.837	160.647
PPP1CA	188.72	179.029	177.82	139.955	143.325	168.981
EIF4H	165.264	137.805	176.006	152.794	201.206	161.222
OTUB1	148.204	184.918	125.2	152.794	137.812	153.463
DDX39B	237.766	137.805	228.626	183.61	187.425	194.558
NPM1	172.727	138.983	166.933	173.338	231.525	169.843
C6orf62	178.058	166.073	161.49	166.918	212.231	173.579
FBXW5	150.336	154.295	136.087	165.634	132.3	150.589
LAMB1	259.091	161.362	195.965	178.474	179.156	198.869
NDUFS2	140.741	164.895	114.313	129.683	126.787	138.519
NME3	229.237	138.983	214.11	204.154	113.006	187.086
EID1	175.926	148.406	176.006	172.054	214.987	172.43
FBLN5	189.787	166.073	148.788	138.671	168.131	163.808
SLC1A4	150.336	150.761	101.612	188.746	99.2249	145.991
EIF5	153.535	137.805	117.942	151.51	206.719	149.152
ALDH2	118.35	187.274	132.458	152.794	124.031	145.703
MXRA8	222.839	159.006	244.957	165.634	212.231	196.857
AIF1	190.853	164.895	177.82	139.955	214.987	173.579
ANAPC11	178.058	136.627	177.82	161.782	110.25	157.199
LY6E	195.118	126.027	281.246	139.955	181.912	178.178
HSPA1A	166.33	171.962	121.571	120.695	165.375	150.301
TACC1	171.661	155.472	223.183	146.375	203.962	173.579
CAVIN3	270.819	130.738	194.151	166.918	173.644	191.11
AP2A2	172.727	141.339	139.716	160.498	135.056	153.175
UBXN6	150.336	162.539	146.974	159.214	107.494	150.301
TMED9	187.654	167.251	179.635	138.671	121.275	163.521
ZYX	152.469	155.472	205.038	141.239	192.937	163.234
NISCH	183.389	155.472	166.933	165.634	126.787	164.096
HMGN2	240.965	179.029	246.771	160.498	162.619	200.593
AURKAIP1	172.727	162.539	125.2	184.894	129.544	160.935
GATM	200.449	135.449	152.417	134.819	234.281	165.82
ACTN4	175.926	155.472	165.119	159.214	203.962	168.407
SF1	190.853	135.449	190.522	139.955	168.131	163.521
ID1	198.316	110.715	433.664	111.707	198.45	194.846
VPS35	98.0919	162.539	81.6522	142.523	159.862	127.598
MSN	164.197	113.071	170.562	166.918	154.35	152.313
GLS	86.3635	155.472	79.8377	156.646	99.2249	119.264
SLCO2B1	191.919	150.761	226.812	163.066	179.156	179.614
PLAAT3	246.296	159.006	221.368	139.955	151.594	187.374
ASAH1	159.932	148.406	127.015	164.35	179.156	154.9
YBX1	167.396	176.673	235.884	110.423	242.55	175.591
ADCY3	206.846	157.828	199.594	141.239	170.887	175.304
[truncated: 17,839 more rows]

## Sheet: cytokines
Gene	Cluster0 (CPM)	Cluster1 (CPM)	Cluster2 (CPM)	Cluster3 (CPM)	Cluster4 (CPM)	All Nodules (CPM)
[truncated: 139 more rows]
