# Supplementary material for: Nageotte nodules in human DRG reveal neurodegeneration in painful diabetic neuropathy
Source: bioRxiv preprint, doi:10.1101/2024.08.22.609215, version 1 (2024-08-23)
Supplement: Supplementary Table 4 [file 609215_file10.xlsx]

## Sheet: Sheet1
Table of Contents	Sheet Name	Description
1	"all_barcodes"	Composition of cell-types per barcode (spot of Visium)
2	"distribution_avg"	Composition of cell-types per type of barcode: nearby_neuron - neuronal barcodes next to nodule; nodule - nodule barcodes; nodule_neuron: barcodes covering both neuron and nodule at the same time; others - all the other barcodes
3	"split_by_clustering"	Composition of cell-types per barcode, of all nodule barcodes. With subclustering labeled.
4	"nodule_avg"	Composition of cell-types per subcluster of nodule barcodes.

## Sheet: all_barcodes
barcode_type	barcode	adipocytes	endothelial cells	fibroblasts	monocytes	MSchwann cells	neurons	NMSchwann cells	SGC	mural cells	T-cells
nearby_neuron	donor14_1.AAGGATGAGGGACCTC.1	9.8323e-08	5.71079e-08	5.51456e-08	0.00088178	0.00057445	0.923673	0.0558742	0.0189958	3.64886e-08	3.77633e-07
nearby_neuron	donor14_1.AAGGGACAGATTCTGT.1	0.0311901	2.92232e-08	3.25321e-08	7.07272e-08	1.96585e-05	0.92454	0.0337316	3.50595e-07	1.77522e-08	0.0105179
nearby_neuron	donor14_1.ATAGACAACGGGACCT.1	2.82075e-09	1.7799e-09	3.42833e-09	0.0273366	0.0312831	0.883188	3.6264e-08	0.0581925	1.64209e-09	3.75837e-08
nearby_neuron	donor14_1.ATAGAGTTATCAACTT.1	0.00231649	1.07334e-08	3.26087e-09	0.0111934	0.00109235	0.945552	1.80084e-08	0.0398459	1.52361e-09	1.45034e-08
nearby_neuron	donor14_1.ATGGGCCTCGGCCTCT.1	9.54601e-10	2.23439e-10	4.2653e-10	0.00816189	2.72674e-09	0.952843	0.0186164	0.0203792	3.37721e-10	1.02657e-08
nearby_neuron	donor14_1.ATTACTTACTGGGCAT.1	0.00393306	4.23504e-08	7.8224e-08	6.52702e-08	0.00662782	0.983919	5.99828e-07	0.00551876	3.81838e-08	9.84274e-08
nearby_neuron	donor14_1.ATTAGATTCCTCAGCA.1	1.3601e-08	0.0105929	2.5713e-09	4.14566e-09	3.03936e-09	0.947486	0.0192055	0.0227156	2.13795e-09	3.19641e-09
nearby_neuron	donor14_1.CAATGGATCTCTACCA.1	0.00152138	0.0195442	1.02274e-06	0.0178032	0.0438629	0.78721	0.0651925	0.0375239	0.0273404	1.92884e-07
nearby_neuron	donor14_1.CAGCTCGACAAGTTAA.1	4.87944e-09	6.03747e-09	5.00248e-09	0.0228875	4.77715e-09	0.817109	4.42848e-07	0.136951	1.2979e-08	0.0230523
nearby_neuron	donor14_1.CGGGCAGCTAAACCGC.1	2.53773e-09	2.17276e-09	1.77728e-09	0.00334416	4.46689e-09	0.943646	0.0102197	0.0427905	1.45378e-09	8.99393e-09
nearby_neuron	donor14_1.CGGTTCAAGTAGGTGT.1	1.13127e-09	1.36509e-09	5.84214e-10	3.90233e-10	2.61723e-09	0.982484	0.0115003	0.00601565	6.75624e-10	9.17066e-10
nearby_neuron	donor14_1.CTAGCCGATGTTATGA.1	3.16833e-08	1.38528e-08	2.05674e-08	0.00711867	1.8379e-08	0.880369	8.06116e-08	0.106411	9.32256e-09	0.00610089
nearby_neuron	donor14_1.GCATGAGGGACGCGGC.1	3.61086e-09	1.25249e-08	4.50221e-09	3.00618e-09	6.87478e-09	0.911362	0.0687734	0.0198648	4.27421e-09	3.58917e-09
nearby_neuron	donor14_1.GTACTCCTGGGTATGC.1	7.28277e-10	9.02094e-10	1.17187e-09	2.33914e-09	1.45818e-09	1	1.27659e-09	4.03953e-09	8.96616e-10	3.23504e-09
nearby_neuron	donor14_1.TAATCGATCCGTACGT.1	4.46274e-09	0.0023348	7.93414e-09	0.0142646	0.0581605	0.812803	0.100871	0.0111577	4.03031e-09	0.000407665
nearby_neuron	donor14_1.TGGAACCACTGACACA.1	1.19121e-08	2.02072e-09	2.25805e-09	1.68974e-09	1.8319e-08	1	5.65415e-09	4.29413e-09	1.48299e-09	6.31514e-09
nearby_neuron	donor14_1.TTCTTTGGTCGCGACG.1	9.58335e-10	4.27249e-09	3.07309e-09	1.77181e-09	0.022953	0.977047	2.42597e-09	4.80721e-09	6.43827e-09	1.0478e-09
nearby_neuron	donor14_1.TTGCTGATCATGTTCG.1	0.00193873	1.51667e-08	8.6488e-09	1.03532e-08	3.60853e-08	0.913558	0.0152076	0.0665014	4.22214e-09	0.00279395
nearby_neuron	donor14_2.AACACACGCTCGCCGC.1	4.5804e-06	2.83158e-09	5.83105e-09	5.07059e-09	1.2375e-08	0.999995	1.4259e-08	6.35699e-08	4.2839e-09	1.18146e-08
nearby_neuron	donor14_2.AACGCGGTCTCCAGCC.1	2.12184e-10	2.46541e-10	2.66457e-10	0.0323643	6.09508e-10	0.960981	1.42272e-09	0.00665509	1.79389e-10	9.65978e-10
nearby_neuron	donor14_2.ACCCGGATGACGCATC.1	5.74497e-11	4.48715e-11	5.39194e-11	1.25221e-10	8.90121e-11	0.893017	0.00830081	0.0986826	3.51899e-11	6.89387e-11
nearby_neuron	donor14_2.ACGGCGACGATGGGAA.1	0.00849667	5.86037e-10	4.56814e-11	3.74175e-11	2.03059e-10	0.972276	0.000591307	0.0186358	4.52707e-11	2.28917e-10
nearby_neuron	donor14_2.AGAGTAAACTTCACTA.1	4.49092e-10	7.43408e-10	2.18081e-09	4.32857e-10	0.0089927	0.987087	6.92109e-10	1.84375e-09	0.00392023	6.58655e-10
nearby_neuron	donor14_2.CAGTGTCGGCTGGCCC.1	5.05735e-10	2.72662e-10	3.70936e-10	3.6495e-10	1.18737e-09	0.997687	0.00231266	2.10512e-09	3.26255e-10	8.42724e-10
nearby_neuron	donor14_2.CGCGCCCGACTTAATA.1	2.06813e-07	0.00894815	6.88509e-08	0.0228286	6.02954e-07	0.905994	1.52635e-07	0.0497161	9.88224e-08	0.0125124
nearby_neuron	donor14_2.CTAGGCGCCCTATCAG.1	2.24125e-10	2.17221e-10	3.76627e-10	1.82451e-10	6.69154e-10	0.979805	0.0201946	4.41409e-09	2.34677e-10	4.63477e-10
nearby_neuron	donor14_2.CTGCCAAGGTTGGAAG.1	7.03075e-09	0.0157864	9.61247e-09	0.02022	1.18537e-08	0.941469	0.0116005	0.00661412	0.00430923	4.70587e-07
nearby_neuron	donor14_2.GCAGACCCAGCACGTA.1	7.74725e-08	2.8818e-08	4.36096e-08	3.2502e-08	1.83672e-07	0.92711	8.472e-08	0.0728892	3.31731e-08	3.39379e-08
nearby_neuron	donor14_2.GCTTACGTAGTTAGTA.1	6.59522e-10	2.5317e-10	3.64441e-10	5.83121e-10	7.53876e-10	0.959747	0.0136723	0.0265805	1.94899e-10	1.78594e-09
nearby_neuron	donor14_2.GTCATTAGAGCGAACG.1	1.22336e-08	1.48179e-08	1.48905e-08	2.69211e-08	1.4041e-08	0.974517	7.4012e-08	0.0254826	1.30858e-08	2.64098e-08
nearby_neuron	donor14_2.GTTCGTCTAAAGAACT.1	0.00366694	2.90771e-08	3.24721e-08	4.19503e-08	4.07418e-08	0.949771	0.0229042	0.023658	2.38021e-08	5.0409e-08
nearby_neuron	donor14_2.TCCCGTCAGTCCCGCA.1	2.8258e-07	1.19609e-07	4.04578e-07	3.27139e-07	1.97596e-07	0.983389	5.17728e-07	4.01243e-07	1.64588e-07	0.0166082
nearby_neuron	donor14_2.TGCTGTTGAAGAACTC.1	3.48318e-09	0.00627997	8.2682e-09	4.51463e-09	3.50618e-09	0.962754	3.42562e-08	0.0305634	5.27724e-09	0.000402066
nearby_neuron	donor6_1.AAATCTAGCCCTGCTA.1	5.9657e-08	6.10686e-08	5.30589e-08	0.013079	4.17912e-08	0.90768	8.15473e-07	0.07924	4.72262e-08	5.95534e-08
nearby_neuron	donor6_1.AACAATTACTCTACGC.1	5.40921e-08	7.04887e-08	6.56456e-08	4.58041e-08	6.23751e-08	0.878551	1.3899e-07	0.121449	9.53992e-08	1.19432e-07
nearby_neuron	donor6_1.AACTCTCAATAGAGCG.1	1.75976e-08	9.88036e-05	1.19759e-06	0.0232708	9.62384e-08	0.869965	0.0930746	0.0135897	4.01545e-08	2.46104e-08
nearby_neuron	donor6_1.AAGCCGCCGTGAAATC.1	1.12659e-07	1.89127e-07	2.00325e-07	0.00670095	1.21417e-07	0.896655	0.0226724	0.0739702	3.61367e-07	5.7416e-07
nearby_neuron	donor6_1.AAGGTGATAAACCAGC.1	8.88684e-10	0.0172056	0.163274	0.0479801	3.03127e-09	0.522494	0.0969056	0.146789	1.93745e-09	0.0053516
nearby_neuron	donor6_1.AAGTAGTGACGCGAGG.1	3.44672e-07	7.0116e-08	1.28324e-07	7.7747e-08	0.0206116	0.870851	2.29516e-07	0.108536	9.95704e-08	2.54621e-07
nearby_neuron	donor6_1.AAGTTCACTCCAAGCT.1	0.00948802	2.15792e-09	1.27948e-08	3.89642e-09	3.49785e-09	0.886899	0.0160961	0.0875173	2.4416e-09	4.15524e-09
nearby_neuron	donor6_1.AATTAACGGATTTCCA.1	0.0146183	0.00334417	3.12911e-09	0.0401331	2.70564e-09	0.890564	0.0513407	8.57685e-09	5.31735e-10	2.05449e-09
nearby_neuron	donor6_1.ACAAAGCATGACCTAG.1	0.0126888	1.02967e-08	4.99207e-09	0.012887	2.10069e-09	0.714485	0.176431	0.0792152	0.00429276	2.87171e-09
nearby_neuron	donor6_1.ACAAGGACAAGAGGTT.1	3.45743e-10	1.95295e-10	3.15484e-10	2.18394e-10	2.27825e-10	0.871822	4.86325e-10	0.128178	2.89996e-10	3.10682e-10
nearby_neuron	donor6_1.ACACACCAGGACCAGT.1	2.45518e-07	3.91367e-08	0.130193	0.0775445	0.0179851	0.601451	0.0464282	0.121057	4.98765e-08	0.00534103
nearby_neuron	donor6_1.ACACCCGAGAAATCCG.1	1.59107e-09	2.32103e-09	3.10683e-09	2.91849e-09	3.89246e-09	0.911663	5.83245e-09	0.0883369	1.93753e-09	3.57998e-09
nearby_neuron	donor6_1.ACACCGGTCTGACCGC.1	0.040493	2.32287e-07	0.0978	0.0176174	0.0493211	0.642718	0.115127	0.0369212	1.65626e-07	1.29005e-06
nearby_neuron	donor6_1.ACATCCTGGTAACTGT.1	0.0287444	0.019744	2.30306e-07	0.0994291	9.00197e-07	0.782246	2.54751e-08	0.068388	1.13713e-08	0.0014475
nearby_neuron	donor6_1.ACCGATGGTAGCATCG.1	4.70194e-10	8.6028e-10	1.65788e-09	0.0998213	1.03846e-09	0.866332	7.01825e-09	0.033847	3.42968e-09	1.20272e-09
nearby_neuron	donor6_1.ACTAGTTGCGATCGTC.1	7.49862e-10	7.72046e-10	1.36352e-09	0.00344956	6.47193e-10	0.947731	0.0424547	0.00589499	5.85727e-10	0.000470105
nearby_neuron	donor6_1.AGACGACGATGCCGCT.1	0.0180018	1.40357e-07	3.38176e-08	0.0255781	0.0107387	0.771062	5.96003e-08	0.173015	2.1444e-08	0.00160358
nearby_neuron	donor6_1.AGAGAAGGAGTACAAT.1	0.000947456	2.13274e-07	2.13402e-08	0.00634729	0.00204652	0.89248	0.0212782	0.0768998	5.40103e-08	3.06324e-08
nearby_neuron	donor6_1.AGCACTACCGGCCTGT.1	6.42088e-10	2.1276e-09	2.83942e-10	1.29199e-10	0.0562012	0.76103	0.0657388	0.11703	1.87951e-10	3.38692e-10
nearby_neuron	donor6_1.AGGCCCTAGAACGCCA.1	0.0102894	3.60206e-10	8.82239e-10	0.00398082	1.96258e-09	0.899262	0.0322042	0.0542633	4.50045e-10	1.70537e-09
nearby_neuron	donor6_1.AGGTTCTCCTTTCCGG.1	2.44179e-07	2.3557e-07	5.70173e-07	3.05041e-07	8.05728e-07	0.848449	4.44206e-07	0.149331	0.00221742	4.02448e-07
nearby_neuron	donor6_1.ATACAGGCCCTCCAAT.1	1.24077e-08	3.90099e-09	1.6297e-08	0.0190985	6.9907e-09	0.703633	0.123368	0.100407	3.86737e-09	0.0534941
nearby_neuron	donor6_1.ATACCACGGGCAACTT.1	1.53628e-09	4.56939e-10	1.10298e-09	4.04018e-10	6.41942e-10	0.926494	8.44071e-09	0.0735064	4.7011e-10	1.78813e-09
nearby_neuron	donor6_1.ATATGGGATAGCAACT.1	3.69714e-07	1.42863e-06	0.072515	0.146774	8.10427e-07	0.492568	0.125099	0.151757	0.0112829	1.69858e-06
nearby_neuron	donor6_1.ATGTTGTAGTCTGTTT.1	9.02077e-08	0.010168	4.0548e-08	0.0429866	1.08426e-07	0.720348	0.0355475	0.190949	6.5094e-08	1.77146e-07
nearby_neuron	donor6_1.ATTATCGGAATGTACG.1	2.44592e-10	6.81762e-10	1.74421e-09	0.0914127	0.0133342	0.674004	0.0706552	0.150594	5.92671e-10	1.47645e-09
nearby_neuron	donor6_1.ATTCAGTAGCAGGGTC.1	5.16651e-11	7.76042e-11	1.08632e-10	4.36993e-10	5.68396e-11	0.889352	1.42755e-10	0.110648	5.59218e-11	8.1512e-11
nearby_neuron	donor6_1.ATTGGATTACAGCGTA.1	8.88805e-08	7.81502e-09	1.17425e-08	0.0611338	1.91955e-08	0.633832	0.0518654	0.205672	7.90207e-09	0.047496
nearby_neuron	donor6_1.CACCCTAACAAGATCT.1	5.1964e-10	9.62993e-11	2.0871e-10	0.00885678	8.37164e-11	0.887238	0.0478315	0.051133	8.60656e-11	0.00494056
nearby_neuron	donor6_1.CACCGTATCCCATCCG.1	1.36242e-08	2.6224e-08	6.24341e-08	0.0385705	0.012419	0.787945	0.0893935	0.0716717	1.7845e-08	2.99033e-08
nearby_neuron	donor6_1.CACCGTTAGGGATCAC.1	7.59009e-10	0.0053155	1.82095e-09	0.00435333	4.64739e-10	0.948959	2.83337e-08	0.0287952	2.39081e-09	0.0125772
nearby_neuron	donor6_1.CACTCTTCTGCTAGCC.1	4.91948e-08	3.82179e-08	8.09883e-08	0.00612584	4.02754e-07	0.957294	0.0363604	0.000218974	3.66466e-08	4.44983e-07
nearby_neuron	donor6_1.CATGATGGAAGTTAGC.1	1.66656e-08	0.0158056	1.07256e-07	0.0719712	1.84841e-08	0.850567	0.0027571	0.0588985	1.70858e-08	5.80677e-08
nearby_neuron	donor6_1.CCAAGAAAGTGGGCGA.1	0.000897874	4.4736e-09	6.04958e-08	0.0242134	0.00625857	0.828107	0.0490369	0.0866415	1.26307e-08	0.00484473
nearby_neuron	donor6_1.CCCAATGAGATTTGCA.1	0.00931384	1.97969e-08	2.29732e-08	4.38308e-08	5.23944e-08	0.88937	0.0594691	0.0418461	1.07684e-08	4.39135e-07
nearby_neuron	donor6_1.CCCGAAGTTTCGCGAA.1	0.00951265	6.55974e-09	2.14262e-08	0.020924	0.0140676	0.763232	0.0554934	0.131732	0.00503853	1.05246e-08
nearby_neuron	donor6_1.CCCGTTTCGCAGATGT.1	0.000368911	8.46333e-09	1.09923e-08	0.0115302	9.30074e-09	0.921542	2.21007e-08	0.066559	1.06226e-08	3.60491e-08
nearby_neuron	donor6_1.CCGCATGTGGTACGAT.1	0.00691766	0.0147129	0.0323372	0.00338373	1.13356e-08	0.911654	0.0305492	4.29032e-08	8.18497e-09	0.000445527
nearby_neuron	donor6_1.CCGCGTAGGTAAGGGC.1	7.93456e-08	7.6106e-08	8.31662e-08	3.46093e-08	1.07905e-07	0.559868	0.100318	0.339813	3.99359e-08	9.09885e-08
nearby_neuron	donor6_1.CCGGAATGGTTTCAGT.1	5.18466e-08	6.3285e-08	3.78294e-08	1.59005e-07	1.64678e-08	0.942946	1.38653e-07	0.0570532	3.36594e-07	6.08065e-08
nearby_neuron	donor6_1.CGAACAGTATGGGCGT.1	2.00105e-08	0.0205328	1.79669e-07	0.0975127	0.0412739	0.475366	0.142718	0.202316	2.42517e-08	0.0202797
nearby_neuron	donor6_1.CGACAGTTCGCGTTAT.1	1.07899e-09	1.47823e-09	1.97726e-09	0.00266548	1.27363e-09	0.9026	2.51209e-09	0.094734	1.16627e-09	2.9946e-09
nearby_neuron	donor6_1.CGAGAGGGTAGCCGCG.1	4.7878e-08	0.0684579	6.6255e-08	0.0526458	7.23822e-08	0.724818	5.07455e-07	0.117888	0.0169736	0.0192156
nearby_neuron	donor6_1.CGATCCACCATTGTTG.1	0.0166505	4.34976e-08	5.8729e-08	5.37188e-08	0.0256372	0.682029	0.12815	0.134946	4.09861e-08	0.0125867
nearby_neuron	donor6_1.CGCAATTACTTTCGGT.1	2.11224e-08	6.12767e-09	8.02418e-09	5.54953e-09	7.34449e-09	0.981595	1.65605e-08	0.0184045	5.86976e-09	9.28778e-09
nearby_neuron	donor6_1.CGCCGTTCAGCATAGT.1	0.00558679	1.02328e-07	2.13527e-07	2.52623e-07	1.328e-07	0.950843	3.37093e-07	0.0435689	1.19209e-07	3.21642e-07
nearby_neuron	donor6_1.CGCGCATGTTTGATTG.1	0.00418062	0.000500521	2.43895e-09	0.131181	1.36095e-09	0.609468	0.0179323	0.236738	1.36995e-09	5.57869e-09
nearby_neuron	donor6_1.CGCTGTGTGGATGTTG.1	2.49656e-10	1.36508e-10	0.00211714	4.0288e-10	0.0313096	0.808845	0.125839	0.0318895	2.11214e-10	2.23897e-10
nearby_neuron	donor6_1.CGGGAACGCCCTGCAT.1	1.38988e-06	2.05028e-07	4.4927e-07	0.0486511	0.0157633	0.850595	0.0268814	0.0581046	1.3924e-06	9.83181e-07
nearby_neuron	donor6_1.CGGGAAGTACCGTGGC.1	3.56529e-08	2.40937e-08	7.64122e-08	2.59108e-08	9.33091e-08	0.806789	0.0856838	0.107527	2.06791e-08	5.45185e-08
nearby_neuron	donor6_1.CGTCGGATAGTGTTGA.1	6.68963e-08	0.0180768	0.143706	0.0931009	2.73886e-08	0.672543	4.39396e-08	0.0661747	4.19112e-08	0.00639764
nearby_neuron	donor6_1.CTAATTCGCACGCGCT.1	2.4377e-10	2.00677e-10	3.27262e-10	3.69332e-10	4.21172e-10	0.956523	5.44388e-10	0.0434774	1.94381e-10	4.64063e-10
nearby_neuron	donor6_1.CTACCCTAAGGTCATA.1	0.00842867	2.92851e-09	2.28499e-08	0.0758074	0.00282613	0.893271	1.93842e-09	8.00568e-09	0.0196669	2.56681e-09
nearby_neuron	donor6_1.CTCGCCGAATGTAGGG.1	3.73071e-07	2.87953e-07	9.85575e-07	0.0512883	1.05225e-06	0.826795	0.0569969	0.0649162	4.392e-07	4.41679e-07
nearby_neuron	donor6_1.CTGTAGTGAGGATCGA.1	0.0339259	1.51106e-08	9.26097e-08	1.55351e-08	0.014351	0.70292	2.51738e-06	0.248801	2.70171e-08	1.32292e-08
nearby_neuron	donor6_1.GAAAGCCCTTTGGACC.1	2.40434e-08	1.87522e-08	3.21692e-08	1.82382e-07	4.90139e-08	0.897078	3.91874e-08	0.102922	2.84628e-08	4.08506e-08
nearby_neuron	donor6_1.GAAAGTGACTAACTGC.1	5.89721e-10	1.18076e-09	1.54009e-09	9.60693e-10	7.04932e-10	0.901907	2.61087e-09	0.0980926	8.02748e-10	9.30448e-10
nearby_neuron	donor6_1.GAAGCTCGGACCCGTC.1	1.95194e-08	1.03891e-08	0.0700402	2.23424e-07	0.076061	0.575499	0.205406	0.0399902	6.54869e-09	0.0330033
nearby_neuron	donor6_1.GAATAGACGCGACCCA.1	0.0112875	6.13508e-10	0.0511653	0.0961031	5.89328e-10	0.614259	0.128107	0.0990786	4.43276e-09	5.46306e-09
nearby_neuron	donor6_1.GACAAACATATGCAGG.1	0.00376803	0.0147769	0.024728	5.62504e-09	3.78452e-09	0.903939	0.0011899	0.051598	2.06948e-08	3.15138e-09
nearby_neuron	donor6_1.GAGAGGGCGCGAGGTT.1	1.89384e-10	1.72648e-10	2.72007e-10	6.18923e-10	3.61803e-10	0.947934	5.29602e-10	0.0516014	2.14275e-10	0.000464206
nearby_neuron	donor6_1.GATCTTTGCAGGGTAT.1	0.00116059	6.40726e-09	1.01925e-08	1.45274e-08	6.17984e-09	0.998839	9.39992e-09	7.82429e-08	5.15333e-09	1.90171e-08
nearby_neuron	donor6_1.GATGACAAGTAGGGCA.1	1.42028e-08	0.00755992	5.50125e-08	9.1454e-09	0.00500167	0.815645	1.16547e-08	0.17114	0.000653461	6.53889e-09
nearby_neuron	donor6_1.GATGCGTCCTGCATTC.1	0.00444417	0.019579	1.02781e-07	2.66257e-07	4.79258e-08	0.92458	7.07969e-08	0.0513926	1.68312e-07	3.41171e-06
nearby_neuron	donor6_1.GATGTTTGTGCGAGAT.1	0.00235527	2.3359e-10	3.67659e-09	2.9643e-10	2.69314e-10	0.785861	3.69247e-08	0.211783	4.39613e-10	4.79411e-10
nearby_neuron	donor6_1.GCAAGAATTCCTTGGC.1	3.76928e-09	4.75834e-09	1.15009e-08	1.57212e-07	8.01839e-09	0.891461	6.00903e-08	0.108539	8.72763e-09	1.54693e-08
nearby_neuron	donor6_1.GCACGCCTACTTAGAT.1	1.66854e-10	0.0224506	2.43082e-10	8.52185e-09	3.80365e-10	0.900616	3.09347e-09	0.0769331	1.27442e-10	3.83828e-10
nearby_neuron	donor6_1.GCAGATTAGGGATATC.1	0.00164495	1.12772e-07	1.95538e-07	0.00617714	0.00112067	0.991056	1.82837e-07	3.85136e-07	1.18337e-07	2.88857e-07
nearby_neuron	donor6_1.GCAGGACTATAGAATA.1	3.01001e-10	2.00602e-10	3.94438e-10	4.8143e-10	2.66289e-10	0.951369	5.49007e-10	0.048631	2.69984e-10	5.71136e-10
nearby_neuron	donor6_1.GCGCGTCATTGGTACA.1	2.76638e-06	0.00384802	0.0187008	0.0235747	0.00395206	0.676416	0.125265	0.14824	9.78201e-08	4.0363e-07
nearby_neuron	donor6_1.GCGGAGAAACTTCGCA.1	1.54413e-08	2.00462e-08	2.64652e-08	9.69969e-05	0.0322981	0.899541	0.0152555	0.0434204	0.00166419	0.00772398
nearby_neuron	donor6_1.GCTCCTGACATACTGG.1	1.2677e-09	1.57395e-09	2.42253e-09	0.0140634	1.85768e-09	0.930756	1.03222e-08	0.0551804	1.11854e-09	3.19395e-09
nearby_neuron	donor6_1.GCTCGCTCATGTCCAA.1	2.63313e-10	0.0229188	0.0594959	0.0567532	0.00369009	0.702356	0.0160389	0.0917907	0.000657137	0.0462992
nearby_neuron	donor6_1.GCTGTTGCTACCGAAC.1	4.20097e-09	0.221802	0.211336	0.12062	1.09431e-09	0.368019	4.77377e-09	0.0583539	0.0198688	3.54201e-09
nearby_neuron	donor6_1.GCTTGATGATAATCAG.1	2.33643e-09	1.42466e-09	9.19342e-09	2.5217e-09	8.32668e-10	0.909118	2.77205e-09	0.0908819	1.18058e-09	1.34893e-09
nearby_neuron	donor6_1.GGAAACTAAATGGGCC.1	9.28433e-09	5.35905e-09	8.87064e-09	0.0031012	0.0178444	0.899172	0.00887829	0.0710039	3.97242e-09	1.12919e-08
nearby_neuron	donor6_1.GGATTCAGTACGGTGG.1	2.70853e-09	1.1967e-09	2.08268e-09	2.1651e-09	1.17234e-09	1	2.45123e-09	8.01042e-09	1.94164e-09	3.27579e-09
nearby_neuron	donor6_1.GGCACTCCACTGGGCA.1	6.0524e-10	7.18009e-10	1.05252e-09	2.04852e-09	9.12148e-10	0.757075	1.69838e-09	0.233816	9.48986e-10	0.0091083
nearby_neuron	donor6_1.GGCGTCCTATCCGCTG.1	5.74059e-07	4.18979e-07	1.45245e-06	6.45598e-08	1.74205e-07	0.805324	0.0298868	0.164786	2.10457e-07	1.96061e-07
nearby_neuron	donor6_1.GGGAAGGGCTTTCTCA.1	0.0106343	1.53198e-08	1.63191e-07	0.0116106	0.0425574	0.77093	1.22049e-07	0.164268	3.76568e-08	5.65924e-08
nearby_neuron	donor6_1.GGGACAGAGTTACTCC.1	0.0100607	1.73255e-08	7.95194e-08	1.33985e-08	4.86259e-08	0.750543	7.64922e-08	0.239396	1.57247e-08	2.62221e-08
nearby_neuron	donor6_1.GGGCAACCGCACGTGC.1	0.00881485	0.0229508	0.0070234	3.70609e-08	1.9767e-08	0.800646	0.0292014	0.131363	3.26736e-08	5.27615e-08
nearby_neuron	donor6_1.GGGCCCGTCTTAAACA.1	8.61247e-08	4.7103e-08	5.26791e-08	8.689e-08	5.77662e-08	0.80257	8.69014e-08	0.191608	4.31708e-08	0.00582147
nearby_neuron	donor6_1.GGGCGTCACCACGTAA.1	1.8637e-08	0.00661281	2.99125e-08	0.00723177	7.8232e-07	0.888462	0.0321284	0.0655636	2.92371e-08	2.50224e-08
nearby_neuron	donor6_1.GGGTACTTCATGAACT.1	2.74473e-08	2.69113e-08	5.16217e-08	0.00942153	2.94894e-08	0.891213	5.47951e-08	0.0993648	2.80906e-08	6.48933e-08
nearby_neuron	donor6_1.GGGTATGTATGCACTT.1	1.54468e-08	1.89821e-08	2.58694e-08	3.01381e-08	1.83346e-08	0.911426	4.58515e-05	0.0885284	5.63844e-08	3.36561e-08
nearby_neuron	donor6_1.GGGTCAGGAGCTAGAT.1	7.84494e-09	9.4958e-09	0.0308208	4.14355e-09	0.0683854	0.719004	0.0197086	0.162081	1.16882e-08	8.95529e-09
nearby_neuron	donor6_1.GGTGGACTGCTCTGGC.1	8.83392e-10	1.28516e-09	0.0176099	0.0289588	0.0400354	0.675228	0.00112049	0.233883	1.92661e-09	0.00316409
nearby_neuron	donor6_1.GGTTTCAATCGGTCAG.1	0.00882757	7.119e-08	0.0601978	0.0979911	0.0755732	0.681246	0.00113603	0.013413	0.0287741	0.0328406
nearby_neuron	donor6_1.GTCCAGGCACGTGTGC.1	0.00423449	6.40155e-09	2.22217e-08	8.41678e-09	2.57052e-08	0.974672	2.09083e-08	0.0210931	7.62369e-09	1.34398e-08
nearby_neuron	donor6_1.GTGACTTCAGTAGTGC.1	7.76033e-10	1.12591e-10	2.15414e-10	0.00736575	1.93146e-10	0.868166	0.0472904	0.0665645	1.20548e-10	0.0106131
nearby_neuron	donor6_1.GTTAACATCACTTAAA.1	0.00117795	2.51658e-08	0.0545427	0.0157623	1.85295e-08	0.74244	0.087148	0.0733894	3.54179e-08	0.02554
nearby_neuron	donor6_1.GTTATAATACGGTGAA.1	7.10685e-10	0.0160439	7.69192e-10	0.0260135	4.96654e-10	0.849425	1.45116e-09	0.108517	2.76172e-09	2.01083e-09
nearby_neuron	donor6_1.GTTCACAGGAGTCTAG.1	1.57616e-09	1.82342e-09	0.0315672	2.70763e-09	0.00871636	0.873411	0.00264904	0.0836563	1.6935e-09	3.68613e-09
nearby_neuron	donor6_1.GTTTGACCAAATCCTA.1	6.08393e-06	3.535e-06	4.75295e-06	0.0144216	3.59776e-06	0.947309	9.78281e-06	0.038228	3.99628e-06	9.16054e-06
nearby_neuron	donor6_1.GTTTGGTAGGGTCAAC.1	4.32935e-07	1.46141e-07	0.153623	4.03553e-06	0.0479818	0.737519	3.00859e-06	0.0608662	1.99044e-07	1.65521e-06
nearby_neuron	donor6_1.TAACGCTTTGAGAGCG.1	4.40746e-08	2.64269e-08	3.81234e-08	5.48862e-08	2.8838e-08	0.853093	4.64823e-08	0.146906	2.65615e-08	5.57584e-08
nearby_neuron	donor6_1.TACCAATAAAGTACCA.1	3.73535e-10	2.5241e-10	9.20159e-10	3.06986e-09	1.16142e-09	0.894676	2.11139e-09	0.105324	4.72146e-10	1.5162e-09
nearby_neuron	donor6_1.TACGAGAACTTCACGT.1	8.21349e-09	8.00541e-09	1.48836e-08	1.04669e-08	4.59403e-08	0.962126	3.32736e-07	0.0378736	1.1188e-08	1.39754e-08
nearby_neuron	donor6_1.TACGCAGTTCTTTCCT.1	1.25001e-09	2.02058e-09	1.76071e-09	1.46178e-09	1.0481e-09	1	1.86047e-09	8.13123e-09	1.4711e-09	1.65337e-09
nearby_neuron	donor6_1.TAGAATAGCCGATGAA.1	4.19998e-08	4.70002e-08	5.74839e-08	0.0138076	3.00589e-08	0.722064	8.23647e-08	0.264128	9.56353e-09	4.27309e-08
nearby_neuron	donor6_1.TAGGGAGCTTGGGATG.1	0.00466908	1.05134e-08	3.39689e-08	0.0480569	8.33557e-08	0.809614	1.96914e-07	0.136402	7.87745e-08	0.00125771
nearby_neuron	donor6_1.TATAAGTGAGGATAGC.1	1.7278e-10	1.68985e-10	2.49854e-10	2.73445e-10	1.75038e-10	0.91217	2.68872e-10	0.08783	2.19389e-10	3.67466e-10
nearby_neuron	donor6_1.TCAACATAGCGCCCTA.1	6.00365e-08	0.0131095	1.07028e-07	0.0188535	4.39264e-07	0.814241	0.0295007	0.120918	0.00337675	5.14945e-07
nearby_neuron	donor6_1.TCAACGAGGAGACAAA.1	7.40915e-10	9.29711e-10	1.02257e-09	5.53642e-10	1.09382e-09	0.918633	1.78886e-09	0.0813669	1.41072e-09	7.49339e-10
nearby_neuron	donor6_1.TCAAGGTTACTACACC.1	0.00230362	9.23344e-10	4.27373e-09	0.0929616	0.0280927	0.812821	0.0124066	0.0514147	9.47505e-10	1.05345e-08
nearby_neuron	donor6_1.TCAGTGTATACGTCAT.1	5.5519e-09	4.71402e-09	3.05655e-08	0.0425844	1.29228e-08	0.843502	5.78645e-08	0.113913	5.90329e-09	1.59651e-08
nearby_neuron	donor6_1.TCCAACTTTAAATTCT.1	2.59419e-10	3.56786e-10	4.97447e-10	1.47431e-09	1.5011e-09	0.946706	5.43623e-10	0.0532938	3.2758e-10	6.54711e-10
nearby_neuron	donor6_1.TCGAGACCAACACCGT.1	3.75086e-09	1.384e-09	1.92837e-09	1.46595e-08	1.53443e-09	0.892257	2.25781e-09	0.107743	1.13402e-09	2.60353e-09
nearby_neuron	donor6_1.TCGGGAGACAGCGTAC.1	4.53007e-08	7.43556e-08	0.0999877	0.0499566	0.0627689	0.635279	0.034991	0.117016	3.13706e-08	6.19271e-08
nearby_neuron	donor6_1.TCGTCTTAGGCGTTAA.1	4.50574e-08	1.48149e-07	0.0300987	0.12331	1.9466e-08	0.608708	8.51727e-08	0.155159	0.00770425	0.0750205
nearby_neuron	donor6_1.TCGTTAGGAGTCCCTA.1	1.75715e-06	1.18762e-06	1.00496e-06	0.0460697	0.214231	0.680394	0.0293273	6.53066e-07	0.0299728	1.05037e-06
nearby_neuron	donor6_1.TCTATCATGCAGTTAC.1	3.32498e-09	2.87239e-09	5.22229e-09	1.06585e-08	4.38785e-09	0.892071	0.0093798	0.0924841	4.40804e-09	0.00606541
nearby_neuron	donor6_1.TCTATTACTAGAGGAT.1	1.0839e-07	0.0122929	1.645e-06	0.145283	3.51756e-08	0.441699	5.56828e-07	0.366844	0.0338779	1.82519e-07
nearby_neuron	donor6_1.TCTGCATACCTTGCTT.1	0.00384785	9.95798e-08	1.62338e-07	0.0146559	1.78195e-07	0.830195	0.0501331	0.101167	1.90914e-07	1.77347e-07
nearby_neuron	donor6_1.TCTTACGGCATCCGAC.1	5.32907e-10	5.31255e-10	7.92894e-10	5.24247e-10	9.37938e-10	0.890332	1.56589e-09	0.0932992	4.79298e-10	0.0163685
nearby_neuron	donor6_1.TCTTAGAGTGAACTCT.1	7.20217e-09	7.03459e-09	2.65781e-08	0.0199524	1.04029e-08	0.919159	3.72198e-08	0.0608882	8.09983e-09	6.11618e-08
nearby_neuron	donor6_1.TGACAGAAATCTTGCT.1	1.51985e-06	0.0359966	1.58775e-06	0.0371682	6.42772e-08	0.804382	0.0232656	0.0991843	8.55473e-08	1.23398e-07
nearby_neuron	donor6_1.TGATGTCAATTAAGTG.1	0.0253905	1.00942e-09	1.15313e-09	7.86332e-10	2.10213e-09	0.814503	0.0957269	0.0643799	5.48091e-10	2.56905e-09
nearby_neuron	donor6_1.TGCCAGTACGTGGAGA.1	1.87002e-10	6.81981e-11	3.13386e-10	0.00725778	2.82593e-10	0.92246	1.44871e-09	0.0627598	9.03786e-11	0.00752221
nearby_neuron	donor6_1.TGGCAATGGGACGGCG.1	0.0181362	0.0443139	0.0677441	0.0508301	0.0174521	0.711566	0.051445	0.0385127	8.42268e-10	9.45126e-10
nearby_neuron	donor6_1.TGGCTATGTGACATAC.1	7.55073e-11	6.87995e-11	1.35266e-10	0.0474954	1.02305e-10	0.822243	3.63162e-10	0.130262	7.7027e-11	2.62623e-10
nearby_neuron	donor6_1.TGGTAGAATATATGGG.1	0.00706496	7.25053e-08	2.17679e-07	0.0386782	0.0217457	0.887723	0.0127262	0.0320611	8.86602e-08	1.26473e-07
nearby_neuron	donor6_1.TGGTCCCACGCTACGG.1	0.00729306	0.0113031	0.0516303	0.0272584	0.00751882	0.781374	0.0906487	0.0229728	3.05494e-07	2.0592e-07
nearby_neuron	donor6_1.TGTCCTAAGTCACCGC.1	1.71994e-07	1.02121e-07	2.14063e-07	7.6768e-08	3.76684e-07	0.735117	0.0737216	0.19116	8.45365e-08	1.43227e-07
nearby_neuron	donor6_1.TTAAGATAGGATTGAC.1	2.65198e-09	1.82323e-09	6.80049e-09	0.0153135	6.94063e-09	0.934867	5.37995e-08	0.0498193	4.04154e-09	8.70087e-09
nearby_neuron	donor6_1.TTACTGGGATATTTCA.1	5.60635e-08	1.03687e-07	8.86835e-08	7.62791e-08	7.43328e-08	0.91706	6.62928e-07	0.0829392	9.00126e-08	1.56637e-07
nearby_neuron	donor6_1.TTATGACAAACTGGAT.1	5.13765e-10	3.52617e-10	5.36259e-10	4.51906e-10	6.51627e-10	0.858445	1.28592e-09	0.141555	5.14751e-10	7.81302e-10
nearby_neuron	donor6_1.TTCCAATCTGGCTATC.1	1.90318e-09	0.00168576	2.36838e-09	0.0441566	2.70072e-10	0.807657	0.0382198	0.0947912	6.46678e-10	0.0134896
nearby_neuron	donor6_1.TTCGGACTGGGCATGG.1	4.67616e-08	1.17186e-07	9.38648e-08	0.032908	3.22197e-07	0.94581	1.22277e-07	0.0212813	7.59184e-08	1.14701e-07
nearby_neuron	donor6_1.TTGACAGGAGCTCCCG.1	5.24843e-09	0.00670649	6.00467e-09	0.0241491	5.54783e-09	0.858977	0.0289871	0.0811802	2.72271e-09	5.69701e-09
nearby_neuron	donor6_1.TTGACGCTCCATGAGC.1	8.99042e-08	0.118194	0.0434623	0.0788389	0.012933	0.72349	2.28818e-07	0.00257491	0.0205067	1.85028e-07
nearby_neuron	donor6_1.TTGACTATTGTCCGGC.1	1.20116e-08	4.98357e-09	1.29274e-08	0.052405	0.0369554	0.859022	0.0337064	1.17314e-07	0.0179106	1.42623e-08
nearby_neuron	donor6_1.TTGTAATCCGTACTCG.1	3.50667e-09	4.14691e-09	7.18482e-09	4.81067e-09	6.14356e-09	0.895136	1.83157e-08	0.104864	8.14118e-09	9.79982e-09
nearby_neuron	donor6_1.TTGTGAGGCATGACGC.1	1.68705e-09	9.43287e-10	2.43074e-09	7.07367e-09	4.91651e-09	0.78594	7.48941e-09	0.21406	1.14052e-09	2.38775e-09
nearby_neuron	donor6_1.TTGTTAGCAAATTCGA.1	1.09176e-08	1.46267e-08	1.65263e-08	0.0116916	0.0205716	0.889038	4.4339e-08	0.0786989	1.1096e-08	2.12592e-08
nearby_neuron	donor6_2.AAACGAGACGGTTGAT.1	0.00104626	0.00793534	6.68505e-09	0.0250896	6.1462e-09	0.952548	1.24283e-08	0.0133806	2.50361e-09	8.35419e-09
nearby_neuron	donor6_2.AACGATAATGCCGTAG.1	3.58816e-10	2.16203e-10	4.16281e-10	1.4673e-09	1.51465e-09	0.962778	1.43551e-09	0.0348798	2.01808e-10	0.00234181
nearby_neuron	donor6_2.AAGTTGTGATGTTATA.1	6.69364e-09	6.38473e-09	3.73357e-07	1.0909e-08	0.0392757	0.866423	7.58894e-08	0.0943006	3.46278e-08	1.13564e-08
nearby_neuron	donor6_2.AATATCGAGGGTTCTC.1	3.67333e-08	1.13325e-09	9.0872e-09	0.0675856	0.0614427	0.648718	0.0248234	0.19743	1.8401e-09	2.86255e-09
nearby_neuron	donor6_2.AATGATGCGACTCCTG.1	1.85134e-09	0.00674865	4.13564e-09	0.0319897	1.01348e-09	0.713432	0.0507502	0.197079	2.24461e-09	2.45063e-09
nearby_neuron	donor6_2.ACAATTTGGCCATATT.1	8.20585e-09	2.13554e-08	2.62182e-08	0.00596483	1.96146e-08	0.785948	1.55965e-07	0.208087	1.84412e-08	2.4072e-08
nearby_neuron	donor6_2.ACAGGTGGAGGTGAGG.1	9.8118e-10	0.00024437	2.28929e-09	0.00573226	1.18969e-09	0.923086	0.0288058	0.0286323	6.8538e-10	0.0134989
nearby_neuron	donor6_2.ACATCGTATGCAATGG.1	7.21775e-08	0.0162544	1.27596e-07	5.57436e-08	0.028761	0.827395	0.0163375	0.0882048	9.21437e-08	0.0230471
nearby_neuron	donor6_2.ACGCATACGTTTACTA.1	1.02882e-10	4.26207e-10	5.10649e-10	0.0380154	2.23823e-10	0.810651	0.0241662	0.127168	3.06023e-10	9.06281e-10
nearby_neuron	donor6_2.ACGCCGCTAGACGACC.1	6.53614e-10	3.98205e-10	1.49867e-09	0.000425901	0.0309361	0.903087	0.00179084	0.06376	6.24537e-10	2.53075e-08
nearby_neuron	donor6_2.ACTCAAGTGCAAGGCT.1	2.51675e-08	0.0062164	8.45975e-09	2.86834e-09	5.54668e-09	0.939515	0.0471381	0.00713034	7.07243e-09	1.47404e-08
nearby_neuron	donor6_2.ACTCGCGATCTGACGC.1	0.00464057	3.13572e-08	1.64774e-08	0.0182821	1.65729e-08	0.894632	5.32231e-08	0.0824448	8.61055e-09	2.41564e-08
nearby_neuron	donor6_2.ACTTCAGGCTGATCCC.1	4.59138e-08	1.36958e-08	1.24363e-07	0.02861	1.61896e-08	0.843819	0.0601257	0.0674452	2.31212e-08	2.69406e-08
nearby_neuron	donor6_2.ACTTTACCCTCATGAA.1	0.00767399	5.41789e-09	2.34326e-08	0.0304279	3.44479e-09	0.872548	0.0183927	0.0709578	1.67305e-08	2.10996e-08
nearby_neuron	donor6_2.AGAACCCAGCGTGACA.1	3.03124e-11	4.22205e-11	6.02478e-11	4.81476e-10	9.90094e-11	0.972811	1.25563e-10	0.0271893	5.56767e-11	8.39126e-11
nearby_neuron	donor6_2.AGAATTATGGATTCGA.1	1.86167e-08	1.29869e-08	5.26023e-08	0.015256	1.11395e-08	0.853707	0.00765763	0.123379	9.01761e-09	4.51121e-08
nearby_neuron	donor6_2.AGATCGTGCATAAGAT.1	3.03993e-08	0.0384047	1.4578e-07	0.0832245	2.04703e-08	0.801476	0.0389069	0.0379872	2.42319e-08	3.76954e-08
nearby_neuron	donor6_2.AGCCCGCAACAAGCAG.1	1.32577e-09	6.77307e-10	2.13909e-09	0.0521023	2.08163e-09	0.794516	2.77718e-09	0.115622	8.89741e-10	0.03776
nearby_neuron	donor6_2.AGCCCTTGGACATCCC.1	1.72034e-06	0.000234251	6.65083e-07	0.00508753	6.47744e-07	0.910153	8.44152e-07	0.0845189	9.73377e-07	1.46087e-06
nearby_neuron	donor6_2.AGCGCTAGAGCGATGT.1	7.43271e-08	0.105085	0.083007	4.21051e-07	0.0263157	0.712281	2.184e-07	0.0733108	9.09021e-08	5.29124e-08
nearby_neuron	donor6_2.AGGCTTCCCGAAGAAG.1	6.95064e-09	0.0196342	2.51185e-09	0.00860803	0.00839454	0.680192	0.0262728	0.240305	5.80234e-10	0.0165935
nearby_neuron	donor6_2.AGGGTGCTCTCGAGGG.1	0.00541533	0.0216094	4.49267e-10	0.0148544	0.00702219	0.854675	0.0375417	0.0588822	2.72054e-10	2.74362e-10
nearby_neuron	donor6_2.AGTCAACACCACCATC.1	5.23366e-10	5.89166e-10	8.45864e-10	1.36494e-08	5.86737e-10	0.920063	7.84108e-10	0.0799369	8.34197e-10	1.8208e-09
nearby_neuron	donor6_2.ATATGTCTCCCTAGCC.1	0.0115117	3.31379e-09	1.73594e-08	0.0922779	4.1835e-09	0.724522	0.00232637	0.154632	2.13729e-08	0.0147309
nearby_neuron	donor6_2.ATCAGCCTCATGCTGC.1	1.97529e-08	1.46731e-08	3.03394e-08	9.86487e-08	0.0214406	0.825202	0.0213967	0.0840086	1.39017e-08	0.0479519
nearby_neuron	donor6_2.ATCATAGCCCTATGTA.1	7.65313e-10	1.24704e-09	2.09188e-09	0.00458804	0.00177084	0.841304	7.88903e-09	0.152337	7.8675e-10	4.7701e-09
nearby_neuron	donor6_2.ATCATGGACTACCGAC.1	7.13722e-08	4.30572e-08	9.0844e-08	0.0202113	3.56962e-07	0.91549	8.3164e-08	0.0642974	4.27011e-08	2.35752e-07
nearby_neuron	donor6_2.ATCCTACCTAAGCTCT.1	8.04821e-08	0.00301131	1.55067e-07	6.70585e-08	0.0127825	0.9088	1.61117e-07	0.0754043	1.07806e-07	1.61239e-06
nearby_neuron	donor6_2.ATTAGATTCCTCAGCA.1	1.77734e-09	8.40077e-10	2.10307e-09	0.00891727	7.23614e-10	0.960066	0.0226565	0.00514945	0.0032111	9.15769e-10
nearby_neuron	donor6_2.ATTGCGATCAGTAACT.1	1.21989e-07	5.26128e-08	0.0548927	0.0066362	0.0259855	0.650059	0.14658	0.115844	4.27074e-08	1.43923e-06
nearby_neuron	donor6_2.ATTTGTCTTGGGAGCT.1	1.46664e-09	4.56498e-09	5.05493e-09	1.72397e-08	1.1868e-09	0.946971	0.0329862	1.3003e-09	0.0150822	0.00496045
nearby_neuron	donor6_2.CAAGCGGCACATAATT.1	4.04354e-10	4.97754e-10	7.77849e-10	7.93062e-10	0.00480907	0.970338	0.0248524	7.40549e-09	1.13982e-09	1.67387e-09
nearby_neuron	donor6_2.CAATACGAGAGTCTGA.1	1.20684e-08	1.52335e-08	1.5359e-08	0.00756401	1.5421e-08	0.811218	3.67462e-08	0.181218	7.23698e-09	1.71655e-08
nearby_neuron	donor6_2.CAATATTCTTGACCTA.1	0.00054035	0.000263986	1.23258e-08	0.0149268	1.99116e-09	0.791868	0.0160886	0.176312	6.31724e-09	4.71313e-08
nearby_neuron	donor6_2.CACACAGCTTGCGCTC.1	2.64848e-10	2.45989e-10	8.95106e-10	0.0672829	5.83522e-10	0.849493	1.49981e-09	0.0832242	2.40846e-10	8.75961e-10
nearby_neuron	donor6_2.CACAGGGCCATATAGT.1	2.10865e-08	8.51476e-10	9.02134e-10	2.7285e-09	5.19647e-10	0.938758	0.00613699	0.0504671	5.97817e-10	0.00463764
nearby_neuron	donor6_2.CACCGTTAGGGATCAC.1	1.30526e-07	0.0554204	0.0142587	1.03684e-07	5.84877e-07	0.701645	0.0115918	0.217082	2.22513e-07	2.24535e-07
nearby_neuron	donor6_2.CACGAAAGTTAGTCCC.1	3.69325e-10	3.42297e-10	8.57828e-10	0.00587566	4.4406e-10	0.897039	1.62933e-09	0.0970856	4.11228e-10	5.26685e-10
nearby_neuron	donor6_2.CAGCTTAGTAGGTAGC.1	4.21866e-08	1.02536e-08	2.42254e-08	0.037684	1.00717e-08	0.723517	0.0303552	0.208443	8.9648e-09	9.88473e-08
nearby_neuron	donor6_2.CAGTCGAGGATGCAAT.1	1.49408e-08	1.90813e-08	2.99678e-08	0.00678783	1.36475e-08	0.920889	0.0212498	0.051073	9.5953e-09	1.33169e-08
nearby_neuron	donor6_2.CATCTAGTGAAGGGAA.1	0.00571929	3.45012e-08	5.92191e-08	0.00902611	5.914e-08	0.883412	0.0581812	0.043661	3.24826e-08	3.06166e-07
nearby_neuron	donor6_2.CATGTAAGAGACATTT.1	1.86384e-07	5.46351e-07	4.15658e-07	8.17371e-08	0.00479032	0.910153	0.0688727	0.00985332	0.00219204	0.00413713
nearby_neuron	donor6_2.CATGTCTCATTTATGG.1	6.15451e-08	0.00333437	0.064338	0.021983	7.44342e-08	0.735835	0.0514424	0.123067	4.40771e-08	3.79364e-08
nearby_neuron	donor6_2.CCACTGTTTGGATTAA.1	1.40636e-10	2.87357e-10	7.2568e-10	0.0134404	5.51502e-10	0.813087	0.13295	0.0355528	3.06351e-10	0.00496911
nearby_neuron	donor6_2.CCCAGTTAAGGCGCCG.1	9.47204e-09	0.0103756	5.09949e-08	0.00318739	0.0341623	0.924216	3.73208e-08	0.0280585	9.26304e-09	2.33327e-08
nearby_neuron	donor6_2.CCCTGCGCTACGCATA.1	3.81468e-08	0.0883912	0.0490186	1.44977e-08	2.16372e-08	0.50849	0.0495817	0.304518	1.14179e-08	2.15662e-08
nearby_neuron	donor6_2.CCGAGAAGTCGCATAA.1	0.00970087	0.0789609	7.08866e-08	0.00439712	4.09752e-08	0.847961	0.00887725	7.41569e-08	0.0501026	4.33399e-08
nearby_neuron	donor6_2.CGACACGCTCCGACAG.1	3.74646e-09	0.00387638	1.21075e-08	0.012743	2.64989e-08	0.931958	0.0448979	7.64901e-09	4.74496e-09	0.00652428
nearby_neuron	donor6_2.CGCCCAGCGTTTCACG.1	1.52485e-06	6.83433e-06	3.26461e-06	0.00996955	2.08202e-06	0.833721	2.76615e-06	0.156285	2.19172e-06	6.27315e-06
nearby_neuron	donor6_2.CGGAACGTAAACATAG.1	3.09869e-10	0.00071023	8.05377e-10	0.0209779	1.54226e-09	0.864897	1.91549e-09	0.096303	1.48305e-09	0.0171119
nearby_neuron	donor6_2.CGTCGTCCTTCGCGAA.1	7.95314e-08	1.39983e-08	2.29151e-08	1.12505e-08	1.34311e-06	0.976714	0.0210801	0.00220389	1.15505e-08	3.19499e-08
nearby_neuron	donor6_2.CGTTCAAGGAAACGGA.1	6.82419e-09	6.17249e-09	1.07124e-08	8.37698e-09	1.30839e-08	0.935958	2.69588e-08	0.0640424	5.56866e-09	2.36444e-08
nearby_neuron	donor6_2.CTACTCTAGGCCCGGC.1	1.07217e-08	2.05881e-08	1.89834e-08	3.94787e-08	0.00376945	0.729457	0.0317489	0.235025	1.75539e-08	3.95629e-08
nearby_neuron	donor6_2.CTAGCCGATGTTATGA.1	0.00408022	7.30264e-07	2.05187e-06	0.0529388	3.40779e-07	0.78992	4.0733e-06	0.153052	6.47942e-07	8.70462e-07
nearby_neuron	donor6_2.CTAGCTTAATGGTCCC.1	3.61121e-09	1.64214e-09	2.83192e-09	0.010469	2.6159e-09	0.737448	0.0442436	0.207839	1.74546e-09	1.54123e-09
nearby_neuron	donor6_2.CTGGGATACGCTACCC.1	0.00981653	2.86084e-08	0.0419577	0.0221553	1.04013e-08	0.879493	0.0465767	7.32103e-08	4.6116e-08	7.63746e-08
nearby_neuron	donor6_2.CTTGTTGCTGAGTCAA.1	2.91216e-09	0.00718735	4.24555e-09	0.0476675	0.00681097	0.906555	5.07266e-08	0.0239357	1.45253e-08	0.00784307
nearby_neuron	donor6_2.CTTTGCTGTCATGGAT.1	0.000971282	1.73952e-08	7.13575e-09	1.82731e-08	1.82134e-08	0.859549	0.0807246	0.0587546	1.83333e-09	2.08206e-08
nearby_neuron	donor6_2.GAAACCATGGTGCGCT.1	0.000561608	3.68446e-08	7.0269e-08	1.73361e-06	0.000531094	0.976622	0.0222828	1.4726e-07	4.48493e-08	6.71602e-07
nearby_neuron	donor6_2.GAACGCGGGTCACACG.1	4.6181e-08	0.000820411	2.47681e-08	0.007211	2.16488e-07	0.907491	0.000966836	0.0835106	1.9355e-08	3.52163e-08
nearby_neuron	donor6_2.GAAGTCTCCCTAGCGA.1	2.72092e-08	2.57748e-08	1.17718e-07	8.13861e-09	9.31353e-09	0.845833	0.0295028	0.0619576	0.00322698	0.059479
nearby_neuron	donor6_2.GAATAGCATTTAGGGT.1	2.95539e-07	1.70255e-07	3.21868e-07	0.0290524	1.48637e-07	0.791895	0.0369224	0.0764853	1.62958e-07	0.0656442
nearby_neuron	donor6_2.GACCAAACGTTGACTG.1	2.65892e-08	2.25951e-08	4.99843e-08	5.07731e-08	1.38338e-08	0.941297	3.31256e-08	0.0587023	9.44451e-08	1.87124e-08
nearby_neuron	donor6_2.GACGCCGTAAAGGCTA.1	2.27472e-06	6.27929e-07	6.03226e-07	0.00578621	0.000481649	0.992174	3.46694e-07	4.37847e-07	1.27613e-06	0.0015521
nearby_neuron	donor6_2.GACGCTTGCTTCTAAA.1	0.0033246	2.11748e-08	1.18706e-08	2.62956e-08	7.43836e-09	0.764115	1.8544e-08	0.23256	1.01077e-08	1.25312e-08
nearby_neuron	donor6_2.GACGGTCCTAGGGTGT.1	7.83413e-09	7.49316e-09	7.88458e-08	2.78229e-08	1.29497e-08	0.965074	9.05761e-08	0.0349262	9.07475e-09	1.10456e-08
nearby_neuron	donor6_2.GAGTATGCCCGCCTTG.1	9.19726e-09	1.08417e-07	5.33121e-08	0.00625219	0.0445028	0.773299	5.20282e-08	0.175946	1.19911e-08	6.47199e-08
nearby_neuron	donor6_2.GATGCTACCTTCGATG.1	4.23561e-09	1.21378e-09	1.83149e-09	0.0245249	1.16603e-09	0.881291	2.78972e-09	0.0767043	0.0121196	0.00535987
nearby_neuron	donor6_2.GATGTTCAATCCACGA.1	2.42099e-08	1.30356e-08	6.19984e-08	0.0426342	0.0229971	0.893397	1.30994e-07	0.0409709	3.57178e-08	1.75297e-08
nearby_neuron	donor6_2.GCAAACCCTACATTAT.1	0.000612578	1.40004e-09	0.00760185	1.87157e-10	8.92093e-11	0.863898	0.117953	0.00993532	1.0732e-09	1.81693e-09
nearby_neuron	donor6_2.GCAAATATTACGCTTT.1	1.46474e-09	1.3719e-09	2.47873e-09	2.35223e-09	2.23816e-09	0.933019	9.83944e-09	0.0669812	1.17309e-09	2.50248e-09
nearby_neuron	donor6_2.GCACGTGGTTTACTTA.1	3.2512e-09	2.66647e-09	1.06762e-08	2.36587e-08	0.0474638	0.861525	2.6513e-08	0.0910113	4.22831e-09	1.57055e-08
nearby_neuron	donor6_2.GCCCGCGCGTAAACGG.1	9.53383e-05	4.86679e-08	6.60727e-08	0.0169042	5.32488e-08	0.749004	9.60561e-08	0.233996	3.51197e-08	1.03981e-07
nearby_neuron	donor6_2.GCCGCTTGTGAGAAAC.1	0.00136915	1.31687e-10	2.72895e-10	1.20376e-10	0.00535598	0.894793	6.53282e-10	0.0984818	2.0011e-10	2.7614e-10
nearby_neuron	donor6_2.GCGGCTCTGACGTACC.1	5.74312e-08	0.000427798	2.01715e-08	0.00449246	1.32116e-08	0.847505	1.12892e-07	0.131708	1.42681e-08	0.0158668
nearby_neuron	donor6_2.GCTAGGCACCACGGAG.1	5.25667e-09	2.67513e-09	4.29701e-09	8.22409e-09	1.85795e-08	0.962463	0.0158617	0.0216748	1.33919e-08	4.18256e-09
nearby_neuron	donor6_2.GGCCCAGCTGGTTTGC.1	1.20752e-07	6.31337e-07	0.00177277	0.033189	2.5015e-07	0.858449	1.46098e-06	0.0756978	0.0308878	6.74377e-07
nearby_neuron	donor6_2.GGGAGTTAATGAGGCG.1	4.43843e-07	1.18707e-07	5.12045e-08	2.93786e-08	2.24042e-08	0.999999	3.87356e-08	2.86445e-07	5.64962e-08	3.04491e-08
nearby_neuron	donor6_2.GGGATGGTCGTAACCG.1	2.19259e-08	1.49875e-08	3.12702e-08	3.43935e-08	2.78571e-08	0.939817	0.0206212	1.25069e-07	1.99511e-08	0.0395619
nearby_neuron	donor6_2.GGGATTTACCGCACCT.1	1.03898e-08	2.92257e-08	4.16874e-08	0.0312274	1.68111e-08	0.870325	0.0466772	0.0517706	8.4437e-09	2.77291e-08
nearby_neuron	donor6_2.GGGCGGGTTCCCTACG.1	2.78182e-09	0.0198414	6.92139e-08	0.00543815	1.47015e-08	0.732809	0.0554829	0.186429	6.39732e-09	6.84482e-09
nearby_neuron	donor6_2.GGTCGGTCGTCCACAG.1	1.07925e-09	2.20824e-09	9.76649e-10	1.20051e-09	0.00408477	0.995915	4.07737e-09	3.57687e-08	8.63217e-10	1.51285e-09
nearby_neuron	donor6_2.GGTCTCCGTCCAGGTT.1	2.15662e-08	0.00305757	5.68419e-08	5.76814e-08	0.0501488	0.761614	0.0448106	0.140369	2.66091e-08	4.9612e-08
nearby_neuron	donor6_2.GTAATAAAGGGCTCCC.1	0.0073829	8.40509e-08	1.49267e-07	0.0280202	0.0111002	0.6723	0.104048	0.177149	7.49827e-08	1.80324e-07
nearby_neuron	donor6_2.GTCAACCAGGCCTATA.1	2.95977e-09	1.8533e-09	2.92936e-09	0.00884429	5.06612e-09	0.906217	6.10603e-09	0.0849385	1.87939e-09	6.55378e-09
nearby_neuron	donor6_2.GTCAGAATAGTCTATG.1	6.95758e-10	8.19364e-10	3.48377e-09	4.78002e-10	0.0292418	0.759752	4.78524e-09	0.211007	1.78627e-09	2.94496e-09
nearby_neuron	donor6_2.GTGAACTCCCATTCGA.1	5.25032e-10	9.59381e-10	1.84959e-09	0.0102036	1.55442e-09	0.837559	0.0885876	0.0636499	7.33108e-10	9.72747e-10
nearby_neuron	donor6_2.GTGACCGCACACTACG.1	1.07156e-08	9.33982e-09	1.08314e-07	1.00566e-08	1.72019e-08	0.974478	4.89916e-08	0.0255222	2.90815e-08	1.53861e-08
nearby_neuron	donor6_2.GTGAGCGTGCTGCACT.1	2.22969e-08	0.0151151	2.5408e-07	0.0182956	0.019034	0.538483	0.0684013	0.336351	0.00431944	2.08689e-07
nearby_neuron	donor6_2.GTGAGGACACTTAAGG.1	5.99587e-09	1.45158e-09	1.946e-09	0.0079763	1.43749e-09	0.904215	3.56735e-09	0.0878082	1.10802e-09	1.79589e-09
nearby_neuron	donor6_2.GTGATTCGCCGCTCAA.1	1.08845e-08	7.73593e-09	1.77454e-08	5.64475e-09	1.41532e-08	1	5.98152e-08	2.56712e-08	1.11816e-08	1.75084e-08
nearby_neuron	donor6_2.GTTCCCGTAAACATAT.1	1.83334e-10	2.0357e-10	1.95093e-09	1.02476e-10	0.024974	0.89912	0.0335665	0.04234	5.75536e-10	3.31981e-10
nearby_neuron	donor6_2.GTTTGGCCCAAGTTAT.1	1.06621e-08	0.0264796	1.15334e-07	0.0092801	0.0416313	0.635803	0.0340328	0.223193	0.0295801	6.69127e-09
nearby_neuron	donor6_2.GTTTGGTGATCGGTGC.1	1.12249e-06	0.00286685	1.95242e-06	0.0157582	2.08131e-07	0.709449	6.53704e-07	0.237822	0.0340994	7.39866e-07
nearby_neuron	donor6_2.TAAAGACAACCCTTTA.1	1.42618e-07	5.04764e-09	1.16369e-08	0.0557917	0.00917303	0.883006	3.68943e-08	0.0520295	6.18207e-09	1.75863e-08
nearby_neuron	donor6_2.TAAGGCTGAATCCCTC.1	4.3516e-08	9.35846e-09	7.37189e-08	0.0823297	6.31901e-09	0.638384	0.0882218	0.162957	5.83993e-09	0.0281074
nearby_neuron	donor6_2.TACCATGTATTGATTT.1	5.01414e-09	3.337e-09	1.07372e-08	0.010343	7.53836e-09	0.704304	2.76756e-08	0.284141	6.88234e-09	0.00121188
nearby_neuron	donor6_2.TAGCGTCCGGTGTGGT.1	9.81304e-08	7.56022e-08	4.28206e-07	2.4219e-07	2.07588e-07	0.871816	2.05859e-06	0.123268	0.00491019	3.15004e-06
nearby_neuron	donor6_2.TATCCTATCAACTGGT.1	3.25529e-08	3.41085e-08	1.02714e-07	0.0180637	3.15757e-08	0.848352	0.010969	0.10963	0.000932235	0.0120529
nearby_neuron	donor6_2.TATGATCTTCTCTTTA.1	5.09242e-08	6.86523e-08	8.88137e-08	1.81228e-07	9.07132e-08	0.876359	0.0312584	0.0923816	4.83399e-08	2.20578e-07
nearby_neuron	donor6_2.TATGGCCCGGCCTCGC.1	0.00328874	5.29246e-09	1.50174e-08	3.90516e-09	1.03614e-08	0.942394	5.8428e-07	0.0543169	7.77445e-09	2.91167e-08
nearby_neuron	donor6_2.TATGTAAAGTGCTTAA.1	2.12645e-09	1.08194e-09	2.01308e-09	0.0450284	9.60235e-10	0.531929	1.39134e-09	0.423043	8.00677e-10	8.17603e-09
nearby_neuron	donor6_2.TCAAACTTAGATTGTT.1	0.00340409	9.47949e-08	0.00816497	0.0568161	0.00979375	0.717287	0.123701	0.0362824	0.013396	0.0311546
nearby_neuron	donor6_2.TCAGTAGGGACTATAA.1	0.0105548	4.41949e-09	2.74251e-08	8.02903e-08	0.00191824	0.853746	9.35643e-08	0.133781	4.7248e-09	1.07483e-08
nearby_neuron	donor6_2.TCCCTGGCTCGCTGGA.1	1.17142e-08	9.17245e-09	5.88895e-09	0.0259578	0.00602314	0.818945	2.34223e-06	0.130305	3.80158e-09	0.0187664
nearby_neuron	donor6_2.TCCGCCTGTCTACAAG.1	1.10745e-09	8.2778e-10	5.89462e-10	6.51994e-10	6.04741e-10	0.946835	1.31121e-09	0.053165	3.43342e-10	6.90181e-10
nearby_neuron	donor6_2.TCCTATCATAGGTAAC.1	0.00494199	8.90111e-08	1.38839e-07	0.0131536	1.4956e-07	0.807681	0.0499406	0.124282	1.22312e-07	2.67253e-07
nearby_neuron	donor6_2.TCCTGCGTTGATACTC.1	5.78056e-09	0.0118856	1.20437e-08	0.0118457	1.16568e-08	0.87607	0.0508486	0.0391053	0.00311716	0.0071279
nearby_neuron	donor6_2.TCGCGTCCAGAAGGTC.1	3.54937e-09	3.01358e-09	2.33984e-09	0.0298548	1.98934e-09	0.78406	9.91237e-09	0.186086	1.34648e-09	3.02969e-09
nearby_neuron	donor6_2.TCGGGAACGTGCCTAG.1	2.52056e-09	2.49221e-09	6.58226e-09	0.00416198	1.21218e-07	0.849094	0.0564312	0.0903128	4.7854e-09	8.46854e-08
nearby_neuron	donor6_2.TCGTGTTCGACCACAA.1	8.13427e-08	0.000814479	7.09603e-08	3.87174e-07	9.72038e-08	0.804785	0.0219967	0.172403	9.53141e-08	1.20653e-07
nearby_neuron	donor6_2.TCTCGACGTATCGCCG.1	1.19316e-09	1.42101e-09	6.76552e-09	0.0196173	0.0717475	0.845035	5.2177e-09	0.0636005	1.50432e-09	3.49186e-09
nearby_neuron	donor6_2.TCTCTCGCCGCACATA.1	1.91706e-07	2.74518e-07	2.51268e-07	2.17414e-07	2.27768e-07	0.870497	0.0144886	0.0946227	1.00175e-07	0.0203907
nearby_neuron	donor6_2.TCTGATCGGGTGCTAG.1	1.01863e-09	1.11212e-09	4.34633e-09	4.11697e-09	1.2204e-09	0.947387	0.0526134	1.44442e-08	8.9707e-10	3.12472e-09
nearby_neuron	donor6_2.TCTTACTTATGCCTCT.1	2.39071e-07	6.04661e-08	0.0255757	1.54782e-08	0.0155237	0.747836	3.10634e-07	0.175405	0.0356593	7.3889e-08
nearby_neuron	donor6_2.TCTTCCCATGGGCACA.1	6.30056e-09	1.30557e-08	1.05137e-08	0.059569	9.6597e-09	0.690353	0.0493783	0.161896	5.42237e-09	0.0388032
nearby_neuron	donor6_2.TCTTTAAGACTATGAA.1	1.22885e-10	1.46511e-10	1.68445e-10	0.0619836	1.85618e-08	0.854719	7.35877e-10	0.0832977	8.12396e-11	6.03339e-10
nearby_neuron	donor6_2.TGACAACGCATGTCGC.1	9.21318e-09	1.83751e-08	0.00547359	0.00856161	9.67365e-09	0.782392	0.108849	0.0867415	4.37062e-08	0.0079826
nearby_neuron	donor6_2.TGATGGCTGTTTCTGA.1	3.53538e-09	6.07524e-09	0.048415	0.0593972	1.089e-08	0.872811	0.0193773	1.47395e-08	7.18482e-09	5.37513e-09
nearby_neuron	donor6_2.TGCAATCTAACACGGT.1	5.08562e-08	1.09434e-08	4.8147e-08	9.28768e-09	1.85407e-08	0.999999	1.68603e-08	1.06599e-06	7.84001e-08	3.16079e-08
nearby_neuron	donor6_2.TGCCAATGGGTACTCT.1	2.45643e-09	3.27791e-09	3.8507e-09	0.00830038	3.69045e-09	0.940194	0.0117254	0.0397806	2.05645e-09	1.10913e-08
nearby_neuron	donor6_2.TGCCTTGGCCAGGCAA.1	6.0928e-08	1.25248e-08	2.18206e-07	0.0441983	2.54648e-08	0.899541	2.89674e-07	0.0562605	1.00655e-08	4.73732e-08
nearby_neuron	donor6_2.TGGGTGTAATAGATTT.1	0.00339051	0.033355	1.59795e-08	0.013437	0.00847992	0.810688	3.25848e-09	0.117541	0.0131087	5.29785e-07
nearby_neuron	donor6_2.TGTACCTACACGAGGG.1	2.605e-08	3.96396e-09	7.88505e-09	1.47941e-08	0.0453197	0.924821	2.3758e-08	0.0298595	4.0565e-09	2.77504e-08
nearby_neuron	donor6_2.TGTAGCCAATTCCGTT.1	2.46076e-07	4.14803e-07	0.00628851	8.45226e-06	0.0125102	0.957748	1.22947e-06	0.00901642	6.85333e-07	0.0144263
nearby_neuron	donor6_2.TGTTCTTCCATTGACT.1	1.66708e-09	2.918e-09	5.88848e-09	0.0492534	4.8879e-09	0.900435	4.42141e-09	0.0503114	2.37669e-09	4.5703e-09
nearby_neuron	donor6_2.TTACTCCGGCCGGGAA.1	5.46254e-10	0.0241376	0.0537462	0.0502142	5.43305e-08	0.832237	0.00772365	0.02976	1.7916e-09	0.00218143
nearby_neuron	donor6_2.TTAGAATAAGGGTCGG.1	2.71065e-09	6.77495e-10	3.1239e-09	0.000602725	1.51253e-09	0.867952	0.0752444	0.0562012	6.32835e-10	1.03977e-09
nearby_neuron	donor6_2.TTAGCTAATACGATCT.1	6.19878e-08	1.98379e-07	7.68591e-08	0.0075201	1.39861e-07	0.891788	0.0358126	0.0648781	5.28305e-08	1.36315e-07
nearby_neuron	donor6_2.TTAGCTGATTTGCCGT.1	3.8301e-09	3.88836e-09	6.57467e-09	0.0423472	0.0126438	0.788549	0.039448	0.117012	3.39836e-09	3.53152e-08
nearby_neuron	donor6_2.TTATGATCTTAACGAA.1	0.00612124	0.0101579	1.57324e-07	0.0708873	1.75531e-08	0.809401	2.04481e-07	0.100386	3.28637e-08	0.00304639
nearby_neuron	donor6_2.TTCGCTAGGAAGTTGT.1	5.89804e-09	3.52934e-09	9.70196e-09	4.46969e-09	8.9691e-09	0.883169	0.0595905	0.0572402	8.21732e-09	7.34278e-09
nearby_neuron	donor6_2.TTCGGTGGAGACGCCC.1	1.55908e-07	7.46948e-07	3.18255e-07	0.00302216	2.62475e-07	0.808119	0.0986968	0.0901601	1.2025e-07	4.43859e-07
nearby_neuron	donor6_2.TTCGTACTCCAGAACG.1	3.64243e-09	0.0227059	2.11037e-08	0.00132291	1.11532e-08	0.885508	0.0114434	0.0790196	6.9402e-09	1.10183e-08
nearby_neuron	donor6_2.TTCTAACCGAAGCTTA.1	8.90603e-08	1.81602e-07	3.01762e-07	0.0412764	1.44977e-07	0.851414	0.0284341	0.0788744	9.87948e-08	5.37472e-07
nearby_neuron	donor6_2.TTGAGTCCCGCTGCTG.1	2.27457e-08	5.81006e-09	9.03878e-09	0.00506541	1.84986e-08	0.919608	0.0605908	0.0147362	7.90829e-09	1.26336e-08
nearby_neuron	donor6_2.TTGATTAGCTGTTTCT.1	0.0294036	1.74977e-07	0.0684133	1.00355e-07	0.170083	0.538742	0.0415399	0.151816	8.46596e-07	1.23928e-06
nearby_neuron	donor6_2.TTGCGTCGGCCAACCG.1	1.20559e-08	1.05179e-08	2.69216e-08	0.00577807	0.00201282	0.742299	0.0753055	0.174603	8.89617e-09	2.19848e-06
nearby_neuron	donor6_2.TTGGACCTATAACAGT.1	3.70911e-09	6.51049e-08	1.06732e-08	0.0173482	1.59146e-08	0.770092	0.12972	0.0828396	4.17413e-09	3.23562e-08
nearby_neuron	donor6_3.AAAGTTGACTCCCGTA.1	2.17214e-08	3.47824e-08	1.76994e-08	2.20402e-08	1.7609e-08	0.987816	0.0121836	1.95944e-07	1.09926e-08	2.12234e-08
nearby_neuron	donor6_3.AAATGATTCGATCAGC.1	3.3925e-07	4.21995e-08	9.14298e-08	0.0431924	7.28682e-08	0.86072	0.0658278	0.030259	3.76936e-08	2.31371e-07
nearby_neuron	donor6_3.AACCGAGCTTGGTCAT.1	3.16713e-08	1.01908e-08	1.8673e-08	2.51945e-08	8.38257e-09	0.985389	3.52409e-08	0.014611	9.51181e-09	2.8128e-08
nearby_neuron	donor6_3.AACGTCATCCGGCTTG.1	1.45109e-08	1.40669e-08	1.82194e-08	0.0317763	1.32304e-08	0.822601	3.11455e-08	0.145623	1.99585e-08	3.87197e-08
nearby_neuron	donor6_3.AAGAGATGAATCGGTA.1	2.03409e-08	0.0323467	8.5426e-09	2.03377e-09	9.18738e-09	0.667464	0.0556857	0.244502	1.58658e-08	9.94364e-07
nearby_neuron	donor6_3.AATCTATGCCGGAGCC.1	2.01223e-08	0.104938	0.0883932	1.52214e-07	0.00847099	0.559871	6.31743e-08	0.0404781	0.173559	0.024289
nearby_neuron	donor6_3.ACAATTTGAGCAGTGG.1	0.00501321	2.32432e-08	4.68327e-08	6.16065e-08	2.62706e-08	0.971001	3.81767e-07	0.0239854	2.35907e-08	8.5673e-08
nearby_neuron	donor6_3.ACACCTTAAGTAGGGC.1	2.98518e-09	5.6885e-08	6.83746e-09	1.0565e-09	3.33167e-09	0.825543	0.0486238	0.125833	2.36216e-09	2.71018e-09
nearby_neuron	donor6_3.ACCCAACGCCCGTGGC.1	1.58635e-08	1.24704e-07	4.67264e-08	1.06823e-07	1.76953e-08	1	3.72398e-08	7.28444e-08	1.67007e-08	5.11778e-08
nearby_neuron	donor6_3.ACTGTACGATACACAT.1	1.02201e-08	4.58158e-09	0.137218	2.95657e-08	0.0222458	0.765729	0.0396272	0.0351793	9.8217e-09	1.48319e-08
nearby_neuron	donor6_3.ACTTATTTATGTGCCA.1	5.55217e-08	0.0279944	0.075168	4.06989e-08	2.67131e-07	0.801982	0.0429738	0.0169068	0.0349746	3.6271e-08
nearby_neuron	donor6_3.AGCCCTTCTAATCCGA.1	5.17242e-08	2.71896e-08	8.38249e-08	7.01242e-08	5.3865e-08	0.902255	2.09728e-07	0.0977446	3.93499e-08	1.31045e-07
nearby_neuron	donor6_3.AGGCTATGGTTAGCTT.1	5.6814e-08	2.00393e-08	2.31912e-08	7.60041e-08	1.99633e-08	0.999999	1.18357e-07	1.4918e-07	1.87596e-08	5.80228e-08
nearby_neuron	donor6_3.AGTACGGGCACCTGGC.1	3.97143e-10	2.11971e-10	4.63227e-10	0.010348	1.90824e-10	0.987831	4.16886e-10	0.0018214	1.8083e-10	5.74244e-10
nearby_neuron	donor6_3.AGTCCATTGGCTGATG.1	2.23112e-10	1.1505e-10	3.42478e-10	0.0141998	1.30677e-10	0.843253	0.0151769	0.127371	1.06391e-10	2.10593e-10
nearby_neuron	donor6_3.AGTGCTTGCACGAATA.1	2.59795e-10	4.11086e-10	4.18437e-10	1.63496e-09	3.37406e-10	0.955799	0.00951621	0.0297778	2.81196e-10	0.00490749
nearby_neuron	donor6_3.AGTGGCGTCTGAAGGT.1	6.76703e-10	6.26052e-10	1.08542e-09	4.07401e-10	1.66315e-09	0.901752	0.0982476	2.25145e-09	9.57132e-10	3.38709e-09
nearby_neuron	donor6_3.AGTTAAACACTTGCGA.1	0.0195506	1.06225e-07	1.76152e-07	0.0114277	6.94356e-08	0.796527	1.35401e-06	0.158028	9.31632e-08	0.0144644
nearby_neuron	donor6_3.ATACGTTATGCACGGA.1	3.8944e-08	3.08733e-08	5.75157e-08	6.75349e-08	6.85634e-08	0.849718	1.47164e-07	0.14839	3.62974e-08	0.00189206
nearby_neuron	donor6_3.ATCACGTGCTAATTAA.1	8.05528e-08	0.0586829	3.25608e-08	1.29097e-08	2.05485e-08	0.86388	0.0261181	0.0423681	0.0089504	5.84665e-08
nearby_neuron	donor6_3.ATCATCCAATATTTGT.1	1.3105e-08	0.00459717	3.58976e-08	0.0244805	1.51135e-08	0.790613	0.0612406	0.119069	1.77167e-08	1.63501e-08
nearby_neuron	donor6_3.ATGGTATTGGGAACCG.1	8.59514e-08	7.29861e-09	1.45113e-08	0.00293786	8.77484e-09	0.843999	0.0398137	0.113249	1.14676e-08	3.34862e-08
nearby_neuron	donor6_3.ATGTAAGGCTGCTCTT.1	1.12528e-07	0.00486253	2.41561e-07	0.0288719	1.07488e-06	0.801219	0.0895059	0.0326321	1.94245e-07	0.0429073
nearby_neuron	donor6_3.ATGTCATAATAAACGA.1	3.26456e-09	6.34405e-09	5.2091e-09	8.11042e-09	3.97009e-09	0.859844	0.0337065	0.106449	8.74494e-09	1.07591e-08
nearby_neuron	donor6_3.ATTAATGAACCAGTCG.1	1.34842e-10	1.24343e-10	1.27374e-09	0.0377675	1.49856e-10	0.884981	9.72738e-10	0.0772514	1.45318e-10	1.9255e-10
nearby_neuron	donor6_3.ATTATCGGAATGTACG.1	0.00196303	2.09881e-09	4.35288e-09	0.0176787	2.37243e-09	0.918957	1.11984e-08	0.0614016	6.16635e-09	1.47204e-08
nearby_neuron	donor6_3.CACACGCGCTGTCTTA.1	1.46911e-08	6.91941e-08	0.0991587	0.0234597	2.92477e-07	0.809513	8.89253e-08	0.067868	3.57058e-08	3.57107e-08
nearby_neuron	donor6_3.CACAGGGCCGTTGTCA.1	1.15168e-08	8.54404e-09	7.03123e-09	0.00317585	4.23663e-09	0.936691	7.53367e-09	0.0601329	7.44535e-09	1.33893e-08
nearby_neuron	donor6_3.CACGCAGCGAGGCTTT.1	0.0107493	2.93639e-09	0.0132646	0.0527751	9.84826e-10	0.746706	2.39359e-09	0.176504	3.56401e-09	2.29792e-07
nearby_neuron	donor6_3.CACGTCAATCAATGGA.1	0.000932606	3.73064e-11	8.33734e-11	5.17657e-11	4.94189e-11	0.878991	1.85432e-09	0.120076	5.26491e-11	1.02591e-10
nearby_neuron	donor6_3.CACTCAAGAGCTATGG.1	1.82894e-06	7.7762e-07	0.05866	2.09262e-06	6.58407e-07	0.855543	2.157e-06	0.0857882	5.89367e-07	8.34331e-07
nearby_neuron	donor6_3.CAGAGCATGAGCTTGC.1	4.24605e-10	0.043153	7.45557e-10	4.65058e-10	3.26781e-10	0.938574	1.13184e-09	0.0182731	1.1454e-09	6.3536e-10
nearby_neuron	donor6_3.CAGGACAGCTGCCCTT.1	0.000733925	5.13432e-08	6.61461e-08	1.81215e-07	6.38105e-08	0.999265	8.57192e-08	1.80763e-07	3.33479e-08	1.26877e-07
nearby_neuron	donor6_3.CATATACTACTGATAA.1	5.23228e-08	1.01955e-09	3.15725e-09	0.00375755	1.80591e-09	0.947367	1.36117e-08	0.0458646	1.80447e-09	0.00301113
nearby_neuron	donor6_3.CATTACGTCGGCCCGT.1	3.24779e-08	1.95757e-09	2.30093e-09	0.0100589	8.40355e-09	0.940136	3.68839e-09	0.0498051	1.09637e-09	2.38905e-09
nearby_neuron	donor6_3.CCATTAGCGATAATCC.1	0.000785494	1.87168e-09	0.202126	1.16434e-08	2.64943e-09	0.766097	2.37573e-09	7.00446e-09	1.54788e-09	0.0309923
nearby_neuron	donor6_3.CCCAATGAGATTTGCA.1	7.57522e-07	0.0368957	2.84992e-07	6.00804e-08	0.0289122	0.913951	5.43197e-07	0.000707046	9.78774e-07	0.0195316
nearby_neuron	donor6_3.CCCGGGTCGTTCAGGG.1	5.51615e-10	0.0285217	9.57449e-10	3.79226e-10	5.79272e-10	0.967761	7.79206e-10	0.00371737	1.42347e-09	6.20917e-10
nearby_neuron	donor6_3.CCCTGAAATGAGTTGA.1	1.04191e-09	4.65544e-10	5.10308e-09	0.0272922	5.48586e-10	0.900329	0.0126469	0.0597319	9.17548e-09	1.37578e-08
nearby_neuron	donor6_3.CCGCACAAAGACCAAC.1	5.85486e-09	0.0307175	8.3669e-09	2.96691e-08	3.43035e-09	0.920491	9.14319e-09	0.0487918	1.22816e-08	7.52791e-09
nearby_neuron	donor6_3.CCGCACGTGACCTCGG.1	1.76629e-09	1.69415e-09	4.7883e-09	1.53959e-09	2.01363e-09	0.712134	1.39901e-08	0.287866	2.07015e-09	2.65255e-09
nearby_neuron	donor6_3.CCGCTATCAGCACCAG.1	1.55622e-07	5.85695e-08	2.39077e-07	7.92954e-08	1.09756e-07	0.971364	0.0267847	3.19015e-07	7.41831e-08	0.00185028
nearby_neuron	donor6_3.CCTATGAAGTGGTGCC.1	8.38347e-09	6.29151e-09	1.02297e-08	1.49219e-07	0.00027572	0.971854	2.5245e-08	0.0278703	6.53705e-09	1.64985e-08
nearby_neuron	donor6_3.CCTATGGGTTACCGTC.1	2.00157e-09	1.09782e-09	2.4253e-09	1.07023e-08	9.44311e-10	0.909722	5.18901e-09	0.0890739	1.19399e-09	0.0012038
nearby_neuron	donor6_3.CCTCTAATCTGCCAAG.1	3.63916e-08	3.24863e-08	6.54894e-08	0.00648097	0.0498166	0.817761	0.0685668	0.0573748	1.52347e-08	3.21907e-08
nearby_neuron	donor6_3.CCTGTAAGACATGATA.1	0.000520852	3.94761e-08	9.19525e-08	3.54875e-08	0.000360417	0.925094	0.0331681	0.0348177	3.98234e-08	0.00603859
nearby_neuron	donor6_3.CGAACAGTATGGGCGT.1	8.17299e-09	2.9207e-09	4.89676e-09	0.01371	4.72535e-09	0.862197	0.0215473	0.0953037	5.90367e-09	0.00724238
nearby_neuron	donor6_3.CGAAGCTATAAATTCA.1	5.18727e-08	4.2115e-08	1.01198e-07	0.0272612	3.95651e-08	0.972735	2.0326e-07	2.69423e-06	1.59598e-07	1.09207e-07
nearby_neuron	donor6_3.CGAGGATCGGGAACGA.1	0.000431693	9.69497e-09	1.57854e-08	6.52938e-08	1.40225e-08	0.884484	6.29394e-08	0.115084	9.44126e-09	3.43351e-08
nearby_neuron	donor6_3.CGAGGCTAAATATGGC.1	0.0020314	0.0669294	0.0616202	2.8306e-08	1.47113e-09	0.699528	0.0420001	0.12789	1.41868e-07	2.83738e-09
nearby_neuron	donor6_3.CGCCATCCGATTATGA.1	1.43017e-07	1.96817e-08	3.53277e-08	8.63136e-08	1.98979e-08	0.909228	5.59754e-08	0.0907712	1.83634e-08	3.19192e-08
nearby_neuron	donor6_3.CGCGCCCGACTTAATA.1	3.527e-10	1.4376e-10	2.94805e-10	5.99631e-09	1.8349e-10	0.999174	6.3694e-10	0.000825516	2.28323e-10	3.57456e-10
nearby_neuron	donor6_3.CGCGGCTCAACTTGAA.1	3.02846e-08	2.96296e-07	8.0555e-08	7.78644e-08	4.05749e-08	0.98967	1.13382e-07	0.010329	5.31425e-08	5.26986e-08
nearby_neuron	donor6_3.CGCGGTAAGTCTAGCT.1	7.05489e-08	0.0512033	0.0498803	0.034857	0.00347834	0.734319	4.63831e-07	0.098432	1.31514e-08	0.0278293
nearby_neuron	donor6_3.CGCTGGTGACTACCCT.1	2.94115e-08	4.07213e-08	1.27798e-07	0.0219101	0.0688913	0.811977	1.12649e-07	0.0653061	3.17503e-08	0.0319151
nearby_neuron	donor6_3.CGCTTTCTTGCATTCG.1	3.71488e-10	1.89097e-10	3.73851e-10	5.95265e-10	1.82365e-10	1	4.66982e-10	4.82247e-10	3.08763e-10	3.66555e-10
nearby_neuron	donor6_3.CGGCCCAGGTATATCC.1	1.39164e-09	1.63509e-09	2.37678e-09	2.98471e-09	7.53153e-09	0.881058	4.72396e-08	0.118942	1.3559e-09	2.39691e-09
nearby_neuron	donor6_3.CGGGAATATAGTATAC.1	3.64544e-07	2.41087e-08	4.79448e-08	3.58298e-08	5.52585e-08	0.962488	0.0324492	2.84243e-07	3.94698e-08	0.00506236
nearby_neuron	donor6_3.CGGTGCGCGTTGGTCC.1	4.87673e-09	3.84496e-09	7.24865e-09	1.36913e-08	6.29805e-09	0.960908	2.64133e-08	0.0390918	4.58488e-09	6.50874e-09
nearby_neuron	donor6_3.CGTTGTCGGCAATTGA.1	2.98146e-07	3.10211e-08	4.28975e-08	0.00170104	6.31458e-08	0.8077	1.31701e-07	0.190598	2.43371e-08	4.66517e-07
nearby_neuron	donor6_3.CTAGCCACAGGCGAGC.1	8.85449e-07	2.05228e-07	2.76179e-07	1.07816e-07	0.0141588	0.845285	0.0544488	0.0861058	6.71411e-08	1.09124e-07
nearby_neuron	donor6_3.CTAGCCGATGTTATGA.1	1.32206e-08	2.96674e-08	3.07586e-08	0.0732001	0.0224776	0.820843	1.22969e-08	0.036228	0.0472511	2.23464e-08
nearby_neuron	donor6_3.CTCGCACCTATATAGT.1	1.822e-07	2.48263e-07	2.79009e-07	0.0222295	1.25908e-07	0.921315	8.62077e-07	0.056453	1.43369e-07	2.99094e-07
nearby_neuron	donor6_3.CTGAATTTATTGCCAG.1	4.31382e-09	0.0143369	8.7263e-09	0.0371369	7.62268e-09	0.749639	2.73356e-08	0.198888	8.51134e-09	3.57692e-09
nearby_neuron	donor6_3.CTGCGATTTCGAGATT.1	0.0103424	1.12152e-08	3.58333e-08	7.43541e-08	2.91431e-08	0.98412	0.00553678	8.67787e-08	1.19358e-08	1.84795e-07
nearby_neuron	donor6_3.CTGCGTTACGATATAA.1	1.30406e-08	2.51956e-09	4.4007e-09	3.28914e-09	2.69371e-09	1	5.60349e-09	1.80871e-08	1.80442e-08	4.03277e-09
nearby_neuron	donor6_3.CTTACATAGATTTCTT.1	3.12662e-08	2.37586e-08	2.90691e-08	7.72308e-08	2.28042e-08	0.92769	5.84158e-08	0.0723097	2.49661e-08	4.70071e-08
nearby_neuron	donor6_3.GAAAGTGACTAACTGC.1	3.11357e-09	4.97084e-10	1.3742e-09	3.69926e-10	7.07802e-10	0.887014	0.0160359	0.0969502	6.35698e-10	1.57226e-09
nearby_neuron	donor6_3.GAAGCCTGCACATTCC.1	1.97752e-09	7.43304e-10	1.51423e-09	4.2123e-09	2.87236e-09	0.921011	2.6567e-09	0.0789889	9.50311e-10	2.25014e-09
nearby_neuron	donor6_3.GAATAGCATTTAGGGT.1	9.1202e-09	8.76796e-09	1.86454e-08	0.000767942	0.0332993	0.925594	7.01492e-08	0.0403389	1.63975e-08	1.86032e-08
nearby_neuron	donor6_3.GAATGTGGTCCGGATT.1	0.0044559	1.47459e-08	3.47538e-08	2.29893e-08	1.91848e-08	0.942996	1.55563e-07	0.0525482	1.34225e-08	8.0563e-08
nearby_neuron	donor6_3.GACAAACATATGCAGG.1	5.0607e-08	1.89245e-08	3.4602e-08	2.97788e-07	2.09201e-08	0.965509	0.0127118	0.0217784	1.77838e-08	1.13407e-07
nearby_neuron	donor6_3.GACAGAGGTCTTCAGT.1	3.57271e-10	1.68458e-10	2.31459e-10	1.0612e-09	1.96655e-10	0.899856	2.99718e-10	0.100144	1.40926e-10	4.24592e-10
nearby_neuron	donor6_3.GACAGCCAGACCTGAC.1	4.73026e-07	1.28797e-07	1.84434e-07	2.08789e-07	3.90241e-07	0.932252	8.17261e-07	0.0677453	1.03596e-07	4.79912e-07
nearby_neuron	donor6_3.GACCGTGCTGACGGTG.1	2.77598e-09	1.33601e-09	2.80877e-09	8.44339e-07	2.21587e-09	0.958032	7.64721e-09	0.0419676	1.83277e-09	3.32031e-09
nearby_neuron	donor6_3.GAGCTAAGGGCATATC.1	3.39392e-10	4.4347e-10	5.51021e-09	0.02896	4.7518e-10	0.862297	0.01326	0.0954834	6.80407e-10	1.56691e-09
nearby_neuron	donor6_3.GAGTAGATACTAGTTG.1	3.37453e-09	3.53856e-09	7.42286e-09	0.025709	2.5633e-09	0.839019	2.95874e-08	0.135272	7.4337e-09	2.71266e-08
nearby_neuron	donor6_3.GATATGCGGTAGCCAA.1	5.63439e-09	2.56593e-09	4.14463e-09	0.0225419	2.69197e-09	0.932436	7.23419e-09	0.0450226	2.68565e-09	4.98296e-09
nearby_neuron	donor6_3.GATCCGAATATAAGTG.1	2.97788e-10	3.11463e-10	6.3961e-10	8.89427e-10	3.82246e-10	0.955723	1.16703e-09	0.0442765	3.25955e-10	9.26035e-10
nearby_neuron	donor6_3.GATCGTGACTGATATC.1	1.03915e-09	9.92527e-10	3.1269e-09	2.37627e-09	1.15138e-09	0.951131	6.19037e-09	0.0488688	2.07793e-09	1.50405e-09
nearby_neuron	donor6_3.GCAGATTAGGGATATC.1	4.88132e-08	5.76528e-08	1.42664e-07	9.62787e-08	1.06792e-06	0.999997	6.35041e-07	4.02805e-07	6.80423e-08	2.19502e-07
nearby_neuron	donor6_3.GCAGCACACAGCCCAG.1	5.27955e-08	2.50891e-08	5.56955e-08	2.84075e-07	5.4064e-08	0.938397	1.18986e-06	0.0604908	4.14761e-08	0.00111096
nearby_neuron	donor6_3.GCATTTCCAAGGCTCC.1	0.0357422	0.0434011	0.00160903	1.44396e-07	4.56956e-08	0.822418	0.0968295	1.61497e-07	5.68746e-08	8.03776e-08
nearby_neuron	donor6_3.GCCATCGATGCTGCAT.1	2.86134e-08	1.71973e-06	1.04425e-07	0.00710023	0.0118684	0.824351	0.0183955	0.0793835	0.0379918	0.0209074
nearby_neuron	donor6_3.GCCCGTAATACCTTCT.1	6.58521e-07	0.0845284	0.0705493	0.00203424	7.7315e-09	0.814269	3.13563e-08	0.0259237	0.00269472	2.93736e-08
nearby_neuron	donor6_3.GCGGCTCTGACGTACC.1	7.4236e-09	3.11515e-09	1.45337e-08	0.00673727	3.67125e-09	0.895131	0.0130701	0.085062	3.31753e-09	4.6076e-09
nearby_neuron	donor6_3.GCGTTCGGAGACCGGG.1	0.000861178	2.00169e-08	3.15764e-08	0.00539022	2.5523e-08	0.987991	5.92068e-08	3.09223e-07	2.29414e-08	0.00575709
nearby_neuron	donor6_3.GCTAACTGAAGTCTGA.1	1.57854e-09	1.98274e-10	4.06473e-10	0.00613312	2.56536e-10	0.832565	7.55087e-10	0.161302	2.38653e-10	5.22061e-10
nearby_neuron	donor6_3.GCTCAATGTAATACCG.1	2.68935e-08	2.13332e-08	3.65044e-08	0.0015938	2.56361e-08	0.893689	7.79784e-08	0.104717	1.86762e-08	5.83374e-08
nearby_neuron	donor6_3.GGAGGGTCAAGTAAGA.1	0.000653315	2.01048e-09	2.1029e-09	0.00405478	1.2089e-09	0.950948	2.65447e-09	0.0443435	2.37966e-09	9.86437e-09
nearby_neuron	donor6_3.GGCCCGTATACCATGC.1	0.00650872	5.11235e-09	1.56675e-08	0.00993437	6.1788e-09	0.965726	0.0178307	2.12034e-07	4.01078e-09	6.14462e-09
nearby_neuron	donor6_3.GGCGAAATCTAACTTG.1	6.48707e-10	2.31972e-10	4.27406e-10	0.0309013	3.51305e-10	0.864412	2.00523e-09	0.104687	2.89501e-10	3.33191e-09
nearby_neuron	donor6_3.GGGAGCGACCGTAGTG.1	1.05943e-08	1.29245e-09	1.94602e-09	3.96976e-09	9.11741e-10	0.965453	4.74322e-09	0.0345465	1.11066e-09	5.01503e-09
nearby_neuron	donor6_3.GGTATAGTGACACATA.1	0.0317581	1.19806e-07	2.28859e-07	3.85817e-07	1.18199e-07	0.927362	4.13639e-06	0.0408739	7.28074e-08	1.0596e-06
nearby_neuron	donor6_3.GGTTACCCGACACTTT.1	1.00529e-08	4.32057e-09	1.73468e-08	7.54153e-08	8.40358e-09	0.977812	1.48998e-08	0.0221874	9.49939e-09	4.18923e-08
nearby_neuron	donor6_3.GGTTAGGCTTGGAGAA.1	1.15663e-09	1.43723e-09	2.24932e-09	0.02184	2.61595e-09	0.899859	1.53855e-08	0.0783011	1.86413e-09	3.75909e-09
nearby_neuron	donor6_3.GGTTTAATTGAGCAGG.1	0.027284	0.00670032	7.13735e-07	4.0418e-07	9.89021e-08	0.912324	7.77202e-07	0.053689	1.02871e-07	2.89155e-07
nearby_neuron	donor6_3.GTTAACTATGTTGTCA.1	5.90377e-08	3.11171e-08	8.40098e-08	0.00897286	2.86993e-07	0.828788	0.0542703	0.107968	4.08721e-08	2.47804e-07
nearby_neuron	donor6_3.GTTAAGTTAGAGTGGG.1	4.31201e-09	4.57419e-08	7.49327e-09	0.00374151	6.63075e-09	0.892309	0.0469945	0.0569553	1.07291e-08	5.56494e-09
nearby_neuron	donor6_3.GTTCCCGTAAACATAT.1	1.17162e-09	3.11415e-10	1.08274e-09	3.53937e-10	6.43572e-10	0.844909	3.73394e-09	0.148569	7.28485e-10	0.00652208
nearby_neuron	donor6_3.TAACTATTACGCCAAA.1	2.49078e-10	0.00440727	3.44774e-10	1.83813e-10	1.66677e-10	0.89587	2.80772e-10	0.0997226	3.50221e-10	4.04439e-10
nearby_neuron	donor6_3.TAATTAGGACATCCGT.1	5.76936e-08	2.8051e-08	5.17607e-08	0.0066901	2.76238e-08	0.946382	1.26568e-07	0.0445692	2.71484e-08	0.00235811
nearby_neuron	donor6_3.TAATTGGAATCGGGAA.1	2.43887e-09	1.72981e-09	2.50311e-09	5.10612e-09	1.24605e-09	0.984462	4.7156e-09	0.0155379	1.53528e-09	5.36402e-09
nearby_neuron	donor6_3.TACATGCCGGAATTGT.1	0.00402699	3.28961e-10	4.58236e-10	1.09289e-09	5.79795e-10	0.892793	9.00045e-10	0.10318	5.14485e-10	1.00754e-09
nearby_neuron	donor6_3.TACCGTAGGTTAACTA.1	1.23699e-07	4.5153e-08	1.01499e-07	7.40172e-08	5.48888e-08	0.955484	2.14166e-07	0.0445156	5.46159e-08	1.49484e-07
nearby_neuron	donor6_3.TACGAGAACTTCACGT.1	1.77851e-06	5.49884e-07	0.0536562	1.56622e-06	5.64571e-07	0.917139	2.24898e-06	0.0291866	5.59053e-07	1.1071e-05
nearby_neuron	donor6_3.TAGACGCCCGTACCGG.1	2.21299e-09	1.01512e-09	1.6529e-09	0.00508185	1.10438e-09	0.935974	3.43357e-09	0.0589439	9.1846e-10	2.25725e-09
nearby_neuron	donor6_3.TAGTCCGCAGAGAATG.1	1.97246e-08	2.36419e-08	2.63603e-08	1.02175e-08	3.74604e-08	0.965736	0.026112	0.00815207	2.84807e-08	2.00514e-08
nearby_neuron	donor6_3.TAGTCTGTGACGTTGC.1	3.15624e-09	0.0438843	7.45055e-09	1.00093e-08	0.0142488	0.883971	3.7923e-09	6.57868e-09	0.0578963	1.60677e-09
nearby_neuron	donor6_3.TCAAGAAATACTAGCT.1	7.07387e-10	6.65594e-10	1.10936e-09	2.34561e-09	0.0105147	0.955048	0.00914219	0.0252955	1.10527e-09	6.86354e-09
nearby_neuron	donor6_3.TCCCGTCGCGTCATAG.1	1.33973e-09	1.15144e-09	3.714e-09	0.0400871	3.5018e-09	0.707085	0.122457	0.116509	0.013862	6.18243e-09
nearby_neuron	donor6_3.TCCCTAGATCAATAGG.1	8.47452e-08	2.0041e-07	1.41554e-07	0.0201157	4.5149e-08	0.84504	0.0620823	0.0727617	2.99774e-08	7.26569e-08
nearby_neuron	donor6_3.TCCGATGACTGAGCTC.1	0.00584752	5.2756e-10	4.17196e-09	0.0368036	4.25667e-10	0.920611	2.59713e-09	0.036738	7.51106e-10	9.13101e-10
nearby_neuron	donor6_3.TCCTAGCAAAGAAGCT.1	1.38504e-10	0.0119118	3.03527e-10	2.7371e-10	7.20696e-10	0.879728	1.36329e-09	0.107785	0.000575873	1.99957e-10
nearby_neuron	donor6_3.TCTGATTGGAAATGGA.1	1.31748e-08	1.06235e-08	1.93674e-08	0.0341139	1.54415e-08	0.860844	9.73169e-08	0.105042	1.31048e-08	9.82154e-08
nearby_neuron	donor6_3.TCTGGGAACCTTTGAA.1	3.95686e-10	1.7709e-09	2.23015e-09	1.80322e-09	5.99402e-10	0.903437	0.00539615	0.0911667	1.20757e-09	9.00385e-10
nearby_neuron	donor6_3.TCTTACTTATGCCTCT.1	1.30118e-08	9.25108e-09	1.30892e-08	1.72751e-08	0.00029375	0.967384	0.0323225	6.35777e-08	7.9962e-09	7.28062e-08
nearby_neuron	donor6_3.TGAAAGGACCTGACTC.1	7.45283e-09	1.39354e-08	1.49767e-08	0.022645	9.15638e-09	0.977301	2.02269e-08	5.37933e-05	8.63728e-09	2.04422e-08
nearby_neuron	donor6_3.TGGACTGTTCGCTCAA.1	3.5218e-09	2.46526e-09	4.53812e-09	8.07827e-09	2.52101e-09	0.990949	6.57809e-09	0.00905142	3.17787e-09	7.06266e-09
nearby_neuron	donor6_3.TTCAAAGTCTCTAGCC.1	1.10854e-08	1.96784e-09	0.117214	8.9255e-10	3.98555e-10	0.717788	0.0133308	0.151667	7.73333e-09	1.01869e-08
nearby_neuron	donor6_3.TTCCGCGTGAGGCGAT.1	3.04266e-09	1.25056e-09	4.7266e-09	1.15679e-09	1.36833e-09	0.990513	1.14993e-08	0.00667926	3.33297e-09	0.00280722
nearby_neuron	donor6_3.TTCGCACTGTACGACA.1	4.9389e-10	2.48337e-10	3.75421e-10	1.8594e-09	2.42562e-10	0.94092	9.48728e-10	0.0590802	2.78669e-10	5.07776e-10
nearby_neuron	donor6_3.TTCGGTACTGTAGAGG.1	4.28583e-10	1.63151e-10	4.23751e-10	3.13912e-10	2.06473e-10	0.890919	1.0425e-09	0.109081	2.14227e-10	6.59213e-10
nearby_neuron	donor6_3.TTCTGCTAGACTCCAA.1	7.22436e-09	4.0804e-09	0.0646786	0.0502925	1.95163e-09	0.796608	3.24557e-09	0.0519015	0.0365194	5.71912e-09
nearby_neuron	donor6_3.TTCTTTGGTCGCGACG.1	6.9355e-07	5.90833e-07	1.44598e-06	7.92124e-06	0.0318457	0.924248	2.68577e-06	0.0129866	1.23915e-06	0.0309053
nearby_neuron	donor6_3.TTGAGCAGCCCACGGT.1	5.29931e-08	0.0972311	3.78809e-07	5.50531e-07	1.43423e-07	0.762884	3.96372e-07	0.108199	2.23801e-07	0.0316844
nearby_neuron	donor6_3.TTGCATGCTGATCACG.1	8.06779e-10	9.94992e-10	1.71218e-09	7.41357e-10	7.17321e-10	0.884859	0.0221316	0.093009	1.8597e-09	8.24961e-09
nearby_neuron	donor6_3.TTGCCAAGCAGAACCC.1	1.29135e-08	3.85118e-08	3.42534e-08	1.0425e-07	1.61964e-08	0.944482	0.0074217	0.0480959	2.28638e-08	2.17715e-08
nearby_neuron	donor6_3.TTGGGACACTGCCCGC.1	0.00328106	1.3006e-08	0.00299277	0.0172012	1.86336e-08	0.898944	2.21206e-06	0.0775787	7.41008e-09	3.28818e-08
nearby_neuron	donor6_3.TTGTAATCCGTACTCG.1	4.19323e-10	4.40437e-10	6.4391e-10	0.014728	4.68766e-10	0.826543	9.78171e-10	0.158729	5.33045e-10	2.3079e-09
nearby_neuron	donor4_1.AAACAGAGCGACTCCT.1	0.0144913	0.031715	3.31382e-07	0.0176971	2.39055e-07	0.819414	0.0865864	0.0300953	2.06023e-07	2.82875e-07
nearby_neuron	donor4_1.ACGATCATCTTGTAAA.1	0.00469379	8.5557e-11	1.86894e-10	9.91787e-11	1.58255e-10	0.99518	1.48093e-10	0.000126418	8.81331e-11	1.27896e-10
nearby_neuron	donor4_1.AGATGAGGGTTGCGAT.1	0.02232	2.25863e-08	0.155435	2.44384e-08	2.74013e-08	0.578065	0.00664654	0.185257	9.21006e-09	0.0522764
nearby_neuron	donor4_1.AGTGTATTGCGCATTG.1	2.61558e-08	0.0439805	2.79652e-08	1.88331e-08	0.0403501	0.859759	0.0122522	0.0436586	3.21418e-08	2.88825e-08
nearby_neuron	donor4_1.AGTTACTCTATCGTGG.1	1.9748e-07	0.0363972	0.0699053	9.4281e-08	4.96803e-07	0.785689	0.0484707	0.0595361	8.44746e-07	3.64972e-07
nearby_neuron	donor4_1.ATAAGTAGGGCGACTC.1	1.69703e-07	0.0299377	2.59018e-06	0.0139255	1.59044e-06	0.866834	0.0142063	0.0750919	2.03811e-07	3.52096e-07
nearby_neuron	donor4_1.ATTACAACTACCGGCC.1	9.13565e-09	0.00191859	5.73418e-08	8.0496e-08	0.0115033	0.979251	0.00621771	0.00110972	2.30355e-08	2.57534e-08
nearby_neuron	donor4_1.CAAACTACGATAGAGA.1	1.33564e-08	1.23948e-08	4.14553e-08	4.69834e-08	4.69298e-07	0.935248	1.02052e-07	0.0549429	1.45011e-08	0.0098086
nearby_neuron	donor4_1.CACCCAAATCTTATGT.1	4.33753e-08	2.57277e-09	6.249e-09	0.0258627	4.71663e-08	0.89464	5.03833e-09	0.0674879	3.42831e-09	0.0120091
nearby_neuron	donor4_1.CATATACTACTGATAA.1	0.0234633	0.0565959	3.45961e-07	1.14097e-07	7.72552e-07	0.886458	0.0334815	7.72173e-08	2.05676e-08	5.69588e-08
nearby_neuron	donor4_1.CCGATCTCAACCTTAT.1	1.43551e-08	4.05773e-08	7.54581e-08	0.0264587	0.0499312	0.828488	0.0521514	0.0429708	2.07531e-08	5.24884e-08
nearby_neuron	donor4_1.CCTCGCCAGCAAATTA.1	8.28963e-09	5.73556e-09	0.00158766	0.0246259	9.93421e-09	0.897998	8.38437e-08	0.0711858	0.00460226	9.34369e-09
nearby_neuron	donor4_1.CGACTTTGTATAGCCT.1	0.00345665	0.0420266	3.05287e-09	5.43392e-09	4.66463e-09	0.902299	0.0489353	0.00328229	6.21625e-09	2.60516e-09
nearby_neuron	donor4_1.CGCACGTGCGCTATCA.1	0.0052497	8.24579e-09	2.00858e-07	1.02341e-09	0.103886	0.792614	0.0154108	0.08284	1.43971e-08	1.59482e-09
nearby_neuron	donor4_1.CGCGGTCACAAACCAA.1	1.61878e-08	0.0137006	2.72743e-08	0.0156269	1.80965e-07	0.829568	9.96561e-08	0.141103	2.17128e-08	1.37095e-06
nearby_neuron	donor4_1.CGCTTTCTTGCATTCG.1	5.53715e-08	4.36909e-09	1.20232e-08	0.0168431	0.0528776	0.825668	1.19452e-08	0.104611	1.0191e-08	1.61482e-08
nearby_neuron	donor4_1.CGGTAGAGGTGCAGGT.1	6.42099e-09	1.03981e-08	1.06519e-08	8.43002e-09	0.217337	0.606769	0.0517304	0.124164	1.34605e-08	1.64627e-08
nearby_neuron	donor4_1.CGGTATAGGTATTAGC.1	2.99951e-07	8.43109e-07	0.0279104	2.54089e-06	0.0480237	0.849256	0.0580547	0.00956853	3.49309e-07	0.0071823
nearby_neuron	donor4_1.CGTTAGCTCACAACTG.1	3.15362e-07	0.00687626	1.65765e-07	0.0485608	0.00427977	0.849919	0.0186977	0.0716652	7.92979e-08	1.12771e-07
nearby_neuron	donor4_1.CGTTGTAAGATTGATT.1	7.30551e-09	6.47137e-09	2.89754e-08	0.0201067	0.0171018	0.869211	3.79106e-08	0.0719451	2.66338e-08	0.0216349
nearby_neuron	donor4_1.CTAGATGTGAGTGTAA.1	0.00365022	2.75254e-08	2.69122e-07	0.00903973	0.010573	0.819204	5.84909e-08	0.146373	0.0111602	8.79819e-08
nearby_neuron	donor4_1.CTAGATTTACGACGGC.1	2.11965e-08	0.0307862	1.50578e-08	6.58721e-08	0.00504389	0.931934	0.00969099	0.0225449	2.39665e-08	2.1777e-08
nearby_neuron	donor4_1.CTAGGTCTGAAGGAAT.1	3.92502e-08	1.65613e-07	1.79315e-07	1.54786e-07	0.00538714	0.952154	1.09522e-07	0.0424585	4.73435e-08	1.41502e-07
nearby_neuron	donor4_1.CTGGCTGGTTGTCAGT.1	6.99228e-08	0.00725242	2.84944e-07	0.0332319	7.61228e-07	0.921706	0.0277558	1.3777e-05	0.0100384	8.5611e-07
nearby_neuron	donor4_1.GACAACGCAGCTTACG.1	4.37253e-08	0.00703986	7.30399e-08	7.34031e-08	1.46824e-07	0.992959	3.51656e-07	6.88948e-07	1.40632e-07	8.75642e-08
nearby_neuron	donor4_1.GACGCCGTAAAGGCTA.1	1.044e-08	1.75562e-08	2.22328e-08	0.0340668	0.00373712	0.831422	0.0679396	0.0601322	0.00270179	1.05567e-07
nearby_neuron	donor4_1.GACTCCCAGAATAAGG.1	0.00876065	0.0104313	3.67791e-06	0.0170455	2.24755e-07	0.845057	2.28466e-07	0.078275	6.39335e-07	0.0404255
nearby_neuron	donor4_1.GAGACTTCGCGACCGA.1	5.10833e-10	4.8225e-10	7.664e-10	1.61512e-09	0.041199	0.910637	3.60987e-09	0.0481638	4.75719e-10	2.75326e-09
nearby_neuron	donor4_1.GATATTTCCTACATGG.1	6.99714e-08	0.123988	3.69851e-07	0.075724	0.0176484	0.624005	0.0465175	0.0452855	0.0115566	0.0552746
nearby_neuron	donor4_1.GCAGATCCATAAGACT.1	7.88428e-10	0.00626624	0.0291501	0.00498631	0.048212	0.803895	4.44741e-09	0.103408	0.0040831	1.68099e-09
nearby_neuron	donor4_1.GCATTCAAGGCAACGC.1	1.40823e-10	1.02836e-10	1.05055e-10	0.0215587	1.22907e-10	0.878697	0.000267165	0.0994774	9.02199e-11	2.18738e-10
nearby_neuron	donor4_1.GCCATCGATGCTGCAT.1	1.88178e-08	0.0331564	4.34256e-08	0.00158776	9.30688e-07	0.81216	7.20508e-08	0.153095	4.38398e-08	6.54374e-07
nearby_neuron	donor4_1.GCGACATGTAAACATC.1	3.42358e-09	5.46337e-10	5.39566e-10	2.27375e-09	9.54465e-10	0.957802	2.27427e-09	0.0421976	1.73609e-09	1.29264e-09
nearby_neuron	donor4_1.GGAATGCGCTAGCGTG.1	0.00809859	0.0829958	2.74027e-06	0.00122568	0.000826468	0.731853	0.00625395	0.156084	0.00639052	0.00626962
nearby_neuron	donor4_1.GGAGTGCCGCCCTGGA.1	9.62525e-09	7.85713e-09	8.53951e-09	1.67809e-08	0.00546033	0.991164	3.94892e-08	0.00337586	2.14002e-08	4.26778e-08
nearby_neuron	donor4_1.GGGTGCATATGAAAGC.1	9.29088e-10	1.9615e-09	1.10891e-09	6.86958e-09	0.0157745	0.957867	1.62135e-08	0.0263588	6.96779e-10	8.11377e-10
nearby_neuron	donor4_1.GGTACCATTAAGACGG.1	1.00679e-06	7.97386e-08	5.10247e-07	3.93611e-07	0.0248863	0.861185	0.0172478	0.0966774	9.64474e-08	1.49052e-06
nearby_neuron	donor4_1.GTCTCGACTAAGTTTG.1	1.6972e-08	3.60928e-08	1.32605e-07	0.0396442	7.70018e-08	0.875153	0.0126828	0.0725192	4.2872e-08	4.67298e-08
nearby_neuron	donor4_1.GTGAGGAGCGGTTGAG.1	0.00379887	0.000644221	0.000369388	0.0320189	0.0253855	0.898757	3.96158e-09	0.0390258	6.16194e-10	9.10378e-09
nearby_neuron	donor4_1.GTGCCTCAGTGTACGG.1	1.74477e-09	3.1095e-09	4.22455e-09	0.0193054	0.00157999	0.94338	2.96256e-08	0.0357349	2.89493e-09	1.85918e-08
nearby_neuron	donor4_1.GTGGTTACTTCTTTCG.1	0.00050116	0.00884066	3.34176e-09	7.30482e-09	2.83412e-09	0.819346	1.20152e-07	0.10643	7.48842e-10	0.064882
nearby_neuron	donor4_1.GTGTTACTATGCGTCC.1	9.92057e-09	3.23028e-08	1.02237e-08	7.71213e-09	0.00243938	0.984625	2.82631e-08	0.0129354	5.85053e-09	1.15854e-08
nearby_neuron	donor4_1.GTTCATCGTTTGGCTG.1	0.0100519	0.0677844	1.32459e-07	0.0127182	4.44655e-08	0.775307	0.0400763	0.0940616	2.81129e-07	4.4339e-08
nearby_neuron	donor4_1.TAGACTACCTAGCGTT.1	6.94537e-08	7.11438e-08	0.058405	0.0261069	0.0855947	0.826187	7.5609e-08	1.07402e-07	3.47435e-08	0.00370647
nearby_neuron	donor4_1.TATGATCCGGCACGCC.1	2.26853e-08	0.0298448	8.07884e-08	0.0503013	5.69981e-08	0.781993	0.0125839	0.125276	1.82435e-08	3.55568e-08
nearby_neuron	donor4_1.TCAAGAAATACTAGCT.1	7.55707e-05	0.0406387	0.0677962	0.0235131	0.0326687	0.700873	0.00036808	0.128703	0.00528583	7.78585e-05
nearby_neuron	donor4_1.TCCCTAGATCAATAGG.1	1.82259e-07	2.41504e-07	0.0791098	2.31793e-07	2.33479e-07	0.848567	8.39229e-07	0.0693375	0.00298316	6.75385e-07
nearby_neuron	donor4_1.TCCTGCCAACTGGAGA.1	1.31086e-07	0.00760106	2.16535e-07	0.0111453	0.0217797	0.778445	4.11873e-07	0.144126	0.0273018	0.00960003
nearby_neuron	donor4_1.TCTCGAACGAGGTCAC.1	7.91501e-07	0.0774178	1.00807e-07	0.0218196	0.00990778	0.827573	4.40001e-07	0.0632803	3.34418e-07	8.52446e-08
nearby_neuron	donor4_1.TCTGATGTATTCTGTC.1	0.015695	3.25418e-10	5.14589e-10	1.08953e-09	0.0020142	0.94916	7.45406e-10	0.0331309	2.76177e-10	5.83623e-09
nearby_neuron	donor4_1.TGAGAATGCTTTACCG.1	0.0096239	3.43386e-08	1.78947e-08	1.92582e-08	1.10855e-08	0.988946	1.38808e-08	0.00143036	3.37527e-08	6.62417e-08
nearby_neuron	donor4_1.TGATCCCAGCATTAGT.1	0.0192786	0.0196355	1.96037e-09	0.0122569	0.0293011	0.845022	0.0259319	0.0395947	1.74951e-09	0.00897909
nearby_neuron	donor4_1.TGCCTTGGCCAGGCAA.1	7.66923e-10	4.23315e-09	1.66478e-09	9.3826e-05	0.00318447	0.955353	0.0124883	0.0240153	2.55391e-09	0.00486503
nearby_neuron	donor4_1.TGGTTGGAGGATCCTG.1	9.33663e-09	7.76655e-08	4.0569e-08	0.0376918	0.000744381	0.847067	3.38724e-08	0.0968556	6.09624e-08	0.0176407
nearby_neuron	donor4_1.TTCCTCGGACTAACCA.1	0.0055185	2.18898e-10	4.47197e-10	0.00848907	0.0405451	0.805478	0.0168908	0.123078	1.88285e-10	6.14201e-10
nearby_neuron	donor4_1.TTCGCACTCGCGTGCT.1	5.90537e-10	6.12269e-10	1.25786e-09	5.90805e-10	1.35846e-09	1	7.18904e-09	6.14679e-09	7.21801e-09	1.87208e-09
nearby_neuron	donor4_1.TTGATAGTCAATACAT.1	6.87507e-10	3.47404e-10	8.77959e-10	0.00857515	0.0138807	0.977544	8.73539e-10	9.4151e-09	3.68479e-10	8.80632e-10
nearby_neuron	donor4_1.TTGATGTGTAGTCCCG.1	0.0123873	2.67063e-09	4.89534e-10	0.00712143	0.0740576	0.847503	0.0589307	3.92663e-09	1.73618e-10	3.56305e-10
nearby_neuron	donor4_1.TTGCCGGTGATCCCTC.1	1.02646e-08	0.0520723	1.84934e-06	7.9142e-09	7.14041e-09	0.897922	0.00957481	0.000656304	0.0203959	0.0193765
nearby_neuron	donor4_2.AAATGGCCCGTGCCCT.1	1.00879e-09	7.5402e-10	1.21505e-09	1.40657e-09	1.43511e-09	0.941993	1.27187e-09	0.0580068	1.19005e-09	2.51051e-09
nearby_neuron	donor4_2.AACCCAGAGACGGAGA.1	2.22935e-09	0.0120382	6.76925e-09	1.76164e-09	1.34251e-08	0.936014	6.1708e-09	0.0336722	0.0182752	1.848e-09
nearby_neuron	donor4_2.AACGTACTGTGGGTAC.1	0.0105729	2.17037e-09	6.35717e-09	0.00989446	8.69857e-09	0.90045	0.0237532	0.0553292	2.25317e-09	1.81782e-08
nearby_neuron	donor4_2.AAGACTGCAAGCTACT.1	1.06158e-07	1.34342e-08	3.4678e-08	0.020626	2.37064e-08	0.929117	9.75727e-08	0.0290052	0.0102946	0.0109565
nearby_neuron	donor4_2.AAGGAGCGGTTGGTGC.1	4.33613e-07	7.35062e-08	8.0069e-08	0.0685318	8.29895e-08	0.700433	2.21864e-07	0.231034	9.92931e-08	2.07417e-07
nearby_neuron	donor4_2.AAGGTGATAAACCAGC.1	5.98451e-11	7.88084e-11	9.34909e-11	1.23701e-10	0.00504378	0.974143	2.53131e-10	0.0208135	1.05414e-10	2.65488e-10
nearby_neuron	donor4_2.ACCCTATGCCATATCG.1	7.77163e-09	1.39222e-08	1.58928e-08	0.0001267	1.84731e-08	0.979193	2.4149e-08	0.0206802	2.05226e-08	1.6533e-08
nearby_neuron	donor4_2.ACGAGGATACCACTCT.1	1.15686e-09	5.88867e-10	9.05021e-10	4.33807e-10	0.0143999	0.939793	1.36967e-09	0.0458073	5.60149e-10	1.61133e-09
nearby_neuron	donor4_2.AGAGCGGGCTAATCAT.1	0.00129472	1.62689e-09	7.31681e-10	0.0138287	0.00338543	0.866632	1.55884e-08	0.108868	3.30315e-10	0.00599202
nearby_neuron	donor4_2.AGCTTGATCTTAACTT.1	0.00606748	4.95035e-08	1.0066e-07	2.46491e-08	0.0174211	0.896487	0.0482764	0.0317478	2.33658e-08	3.33879e-08
nearby_neuron	donor4_2.AGGCAGATGCGTAAAC.1	2.50048e-09	0.0170263	0.0078696	7.91937e-10	0.040845	0.910096	6.16696e-09	0.00271122	1.45436e-09	0.0214523
nearby_neuron	donor4_2.ATGGAGCAGGCCGTGA.1	8.48629e-11	4.87335e-11	1.15166e-10	6.6925e-11	2.08094e-10	0.99202	2.91144e-10	0.00797995	7.14605e-11	1.99645e-10
nearby_neuron	donor4_2.CACGCAGCGAGGCTTT.1	7.42217e-10	3.82538e-09	1.14695e-09	0.00921423	1.09316e-09	0.786825	1.27447e-09	0.203961	6.86197e-10	2.44794e-08
nearby_neuron	donor4_2.CAGTACCAGTTTACGT.1	0.00914252	2.6688e-08	1.22789e-08	9.91176e-09	0.00290413	0.900486	0.00269509	0.084772	1.36223e-08	3.41138e-08
nearby_neuron	donor4_2.CAGTGAATAAATGACT.1	9.24809e-11	5.88101e-11	1.10723e-10	0.00209403	6.45344e-11	0.969896	1.3213e-10	0.0280102	6.13908e-11	5.02624e-10
nearby_neuron	donor4_2.CATCGGACGGGTTAAT.1	4.29597e-10	4.05102e-10	6.03488e-10	0.00497302	3.96581e-10	0.932582	0.0114337	0.0470684	3.01006e-10	0.00394262
nearby_neuron	donor4_2.CATTTAGCGGACCATG.1	2.60821e-10	2.84522e-10	3.49875e-10	3.99592e-08	3.1187e-10	0.965382	1.14824e-09	0.0346182	1.58384e-09	2.01296e-09
nearby_neuron	donor4_2.CCGCCGGTCAACACAC.1	1.43192e-07	2.13177e-07	4.40071e-07	0.00387767	2.01801e-07	0.879744	1.23804e-06	0.116375	1.65784e-07	2.74847e-07
nearby_neuron	donor4_2.CGCGTTCATGAAATAC.1	3.31404e-08	3.0628e-08	3.96384e-08	0.00810173	0.0123705	0.921854	1.69579e-07	0.0576734	1.86733e-08	5.22762e-08
nearby_neuron	donor4_2.CGGGCCTTCTTTGTAA.1	6.68205e-09	4.45839e-09	0.0137052	4.31508e-09	5.02698e-09	0.910975	1.82965e-08	0.0753201	1.36499e-07	4.23723e-09
nearby_neuron	donor4_2.CTAGTCACGTCTTAAG.1	0.009086	3.59195e-08	0.0278355	1.24885e-07	2.20505e-08	0.934845	4.09895e-08	0.0282335	2.01739e-08	3.01639e-08
nearby_neuron	donor4_2.CTCCGCCCACATGAGG.1	9.91046e-08	5.37541e-08	1.45603e-07	1.66e-07	0.00944316	0.838488	0.0526728	0.099395	6.90694e-08	2.28731e-07
nearby_neuron	donor4_2.CTCTGCGAAGCAAGCA.1	1.82134e-08	1.52058e-08	0.000580694	0.0310985	3.06729e-08	0.900152	0.00883886	0.0593297	2.79125e-08	4.76936e-08
nearby_neuron	donor4_2.GAAATCGCGCGCAACT.1	0.000219901	3.43587e-08	2.17932e-07	9.81742e-09	0.00446962	0.948362	0.0469479	7.4446e-08	9.80709e-08	3.43324e-08
nearby_neuron	donor4_2.GACATCGATTTATAAC.1	0.000275086	3.40023e-09	3.48302e-09	2.80824e-09	0.0286735	0.891589	2.9591e-08	0.0794623	3.17598e-09	4.22925e-09
nearby_neuron	donor4_2.GAGTATGCCCGCCTTG.1	2.99345e-09	6.29363e-09	2.19211e-09	2.52668e-09	1.69331e-09	0.907923	4.53111e-09	0.0799081	2.10053e-09	0.0121694
nearby_neuron	donor4_2.GGAGCACCAAGAACTA.1	1.48279e-05	0.00623116	6.27656e-07	0.00403163	2.04686e-07	0.841892	5.39862e-07	0.131275	5.48864e-07	0.0165538
nearby_neuron	donor4_2.GGTGCTGGTACACATT.1	0.00690859	0.0679601	2.34163e-07	2.87469e-07	1.06799e-07	0.801229	1.15853e-07	0.123902	8.02735e-08	1.20846e-07
nearby_neuron	donor4_2.GTAAGGATTTGTCGGA.1	0.0213736	0.0309305	4.10079e-08	0.0524738	8.72341e-09	0.70377	0.0132066	0.167962	0.0102836	4.95559e-09
nearby_neuron	donor4_2.GTGGAGTCGGCGGTTG.1	1.04006e-08	0.0209926	1.40004e-08	9.49678e-08	9.32819e-08	0.854535	2.57859e-08	0.124472	1.23734e-08	4.18396e-08
nearby_neuron	donor4_2.GTGGCAAACAGCGGCA.1	6.49452e-09	2.52889e-09	3.04961e-09	3.47965e-09	0.00101779	0.956702	0.0315022	0.0107783	3.19825e-09	9.79531e-09
nearby_neuron	donor4_2.GTGGCGGTCCCAGCGT.1	8.62361e-09	1.53324e-09	2.85644e-09	0.00883805	4.61502e-09	0.991162	1.68283e-08	1.92318e-09	8.56254e-09	1.03819e-08
nearby_neuron	donor4_2.GTTGAACCGGTTCCAT.1	1.77567e-09	2.20259e-09	2.19678e-09	0.0129492	0.00694626	0.6763	4.91858e-09	0.303805	5.33575e-09	6.55078e-09
nearby_neuron	donor4_2.TAGCGTTGGGTCTTAC.1	0.00211916	0.0390594	4.39072e-07	2.41503e-07	0.0209749	0.865371	0.00301278	0.0518401	6.18712e-07	0.0176216
nearby_neuron	donor4_2.TCAACCATGTTCGGGC.1	0.00844377	0.0176872	3.33246e-07	0.0123291	2.77073e-08	0.866402	0.0149628	0.0732212	2.50552e-08	0.0069536
nearby_neuron	donor4_2.TCAACGAGGAGACAAA.1	5.14368e-07	7.43886e-07	1.28933e-06	0.0230756	2.91421e-07	0.906127	8.15851e-07	0.0707821	1.08801e-05	3.33889e-07
nearby_neuron	donor4_2.TCCGATAATTGCCATA.1	0.00334104	6.68306e-09	9.34085e-09	0.010741	0.0165194	0.822479	1.01416e-08	0.146919	1.38601e-08	6.86683e-09
nearby_neuron	donor4_2.TGCGGCATAGTTCAAC.1	5.34426e-09	0.0211358	6.63763e-09	0.0219518	8.6291e-09	0.776501	7.88641e-09	0.17393	2.34647e-09	0.0064822
nearby_neuron	donor4_2.TGCGTAAGAACCTGAT.1	8.87328e-08	2.3946e-08	1.04818e-08	3.11034e-08	0.0485251	0.88881	0.0334492	0.0205768	1.3422e-08	0.00863851
nearby_neuron	donor4_2.TTCGGGCGCTAGTCTT.1	9.26343e-10	0.0167456	9.6477e-09	1.93212e-09	1.35758e-09	0.815053	1.85724e-08	0.168201	1.96945e-09	6.41389e-09
nearby_neuron	donor3_1.AAATTGATAGTCCTTT.1	1.73613e-08	0.0958017	1.00704e-07	0.0254211	0.0113527	0.692813	1.15545e-08	0.171575	1.5493e-07	0.00303611
nearby_neuron	donor3_1.AACACGAGACGCGGCC.1	7.91092e-09	1.30015e-08	1.29098e-08	7.58537e-09	9.45002e-07	0.922715	2.78576e-08	0.0772838	1.24438e-08	2.08662e-08
nearby_neuron	donor3_1.AACAGGATGGGCCGCG.1	0.00700135	0.00717679	9.71898e-09	6.46439e-09	6.75232e-09	0.786056	0.000301717	0.189964	4.88869e-09	0.00949963
nearby_neuron	donor3_1.AAGAGATGAATCGGTA.1	0.00499198	9.43423e-09	1.72083e-08	0.0155249	3.76741e-09	0.83281	0.0793136	0.0606402	0.00520395	0.00151492
nearby_neuron	donor3_1.AAGCATACTCTCCTGA.1	0.00448808	7.20522e-09	9.239e-09	0.0101116	0.00592618	0.817803	0.0864893	0.0687024	2.63007e-09	0.00647975
nearby_neuron	donor3_1.AAGCTCGTGCCAAGTC.1	6.13597e-08	3.1266e-08	6.54843e-08	0.011066	5.39453e-08	0.698222	1.69568e-07	0.289984	5.52894e-08	0.000727462
nearby_neuron	donor3_1.AAGGAGCGGTTGGTGC.1	2.94076e-09	0.000260533	9.98732e-09	0.0332597	1.66024e-08	0.698563	0.0299887	0.237928	8.04113e-09	9.53889e-09
nearby_neuron	donor3_1.AATAGAACAGAGTGGC.1	3.92256e-07	1.13724e-06	1.68466e-06	0.00664138	7.89846e-07	0.914104	0.0732591	0.00598979	1.96842e-07	1.74529e-06
nearby_neuron	donor3_1.ACCACAAGTTTCTATC.1	0.0170619	1.58394e-09	2.4608e-09	0.0274467	2.45893e-09	0.604992	0.244228	0.106272	2.82798e-09	5.09588e-09
nearby_neuron	donor3_1.ACCACGTGCAGCTATA.1	5.93759e-10	0.0859247	2.07377e-09	6.00192e-08	6.2212e-10	0.704742	5.40869e-09	0.181672	1.28189e-09	0.0276607
nearby_neuron	donor3_1.ACCATATCCGCAATAA.1	6.40956e-10	1.04008e-09	1.0483e-09	0.0139492	9.49216e-10	0.808222	2.77856e-09	0.177829	8.6627e-10	1.84025e-09
nearby_neuron	donor3_1.ACCCACCTACATGCTC.1	6.18021e-09	0.0401739	3.07606e-08	0.0560982	0.0210821	0.557233	0.171125	0.154289	3.71854e-08	1.86097e-08
nearby_neuron	donor3_1.ACGAGGATACCACTCT.1	9.40824e-08	0.00480315	0.0622113	2.8598e-07	7.17103e-08	0.450452	0.153692	0.328841	5.24137e-08	1.32425e-07
nearby_neuron	donor3_1.ACGCCGCTAGACGACC.1	1.43344e-09	2.18548e-10	4.24173e-10	4.22104e-10	5.23465e-10	0.877602	1.58632e-09	0.122398	2.44165e-10	4.07657e-10
nearby_neuron	donor3_1.ACGTAGATTGCTGATG.1	2.77927e-10	4.11138e-10	6.62187e-10	1.70797e-09	7.12619e-10	0.885479	1.10822e-09	0.114521	4.20797e-10	7.46606e-10
nearby_neuron	donor3_1.ACTCTCTGACTTAGGT.1	2.0161e-10	2.25944e-10	3.4925e-10	2.30916e-09	2.07454e-10	0.917882	6.55275e-10	0.0821178	2.36066e-10	7.14967e-10
nearby_neuron	donor3_1.AGACGACGATGCCGCT.1	0.0336174	3.2208e-08	0.00561971	3.36112e-08	7.28062e-08	0.61673	0.0648297	0.240992	0.0382108	4.61043e-08
nearby_neuron	donor3_1.AGCCGTGGCTAAATGT.1	2.20586e-07	0.00778297	6.22068e-08	0.015809	2.1134e-07	0.748013	0.0387108	0.189683	2.74004e-08	5.87954e-07
nearby_neuron	donor3_1.AGCGTGGTATTCTACT.1	7.80751e-11	6.92667e-11	2.02899e-10	0.0176217	1.2518e-09	0.852347	0.0329814	0.0924286	1.08338e-10	0.00462116
nearby_neuron	donor3_1.AGCTTGATCTTAACTT.1	1.14997e-09	1.99204e-10	3.57934e-10	2.06402e-10	1.3621e-09	0.837985	5.1923e-09	0.162015	2.18248e-10	8.19419e-10
nearby_neuron	donor3_1.AGGCTATGGTTAGCTT.1	4.69645e-08	6.20492e-08	1.20853e-07	0.0205059	1.61642e-07	0.883911	5.4421e-07	0.0955823	1.00992e-07	1.64192e-07
nearby_neuron	donor3_1.AGGCTTGCTAGACACC.1	2.18348e-09	4.98813e-09	0.0563367	8.17766e-09	1.59303e-07	0.874208	0.00508478	0.0643699	4.89535e-09	9.50885e-09
nearby_neuron	donor3_1.AGGTTGAGGCACGCTT.1	3.4582e-08	1.0892e-08	2.02393e-08	2.7307e-08	1.6784e-08	0.884952	0.0552958	0.0597517	1.53327e-08	1.29061e-07
nearby_neuron	donor3_1.AGTTAAGTCAACCGCT.1	1.52034e-08	1.21662e-08	3.74719e-08	0.00545715	2.68779e-08	0.915184	0.0040385	0.0753196	2.02577e-08	2.15785e-07
nearby_neuron	donor3_1.ATACGCCGGCGAAACC.1	2.09789e-09	1.42692e-09	1.80735e-09	2.6416e-09	1.03361e-09	0.90854	3.43817e-09	0.0914601	1.23404e-09	1.42464e-09
nearby_neuron	donor3_1.ATATTTAACCCTCAAG.1	1.05279e-08	1.09289e-08	1.62328e-08	0.0142993	1.69952e-08	0.822062	3.25165e-07	0.163639	1.59616e-08	3.24975e-08
nearby_neuron	donor3_1.ATCAAACGAAGGTTTG.1	5.51842e-08	3.95952e-08	1.81215e-06	1.94747e-08	2.59645e-07	0.784614	0.171047	0.044337	7.26555e-08	3.14959e-07
nearby_neuron	donor3_1.ATGGAGCAGGCCGTGA.1	2.05194e-07	1.17743e-07	1.68242e-07	1.05798e-07	8.50971e-08	0.983366	1.33795e-06	0.0166317	1.42317e-07	1.72935e-07
nearby_neuron	donor3_1.ATTAGGCGATGCTTTC.1	1.47661e-07	9.14442e-08	3.10208e-07	6.13735e-07	9.8243e-08	0.917199	1.95129e-07	0.082799	1.16503e-07	9.12454e-08
nearby_neuron	donor3_1.ATTCATATACTGTCCA.1	0.00854765	0.00146506	1.48432e-08	0.00426276	2.41127e-08	0.826048	0.0964869	0.0631895	1.36602e-08	1.53181e-08
nearby_neuron	donor3_1.ATTTGCGCGAGTAGCT.1	2.32633e-08	3.57361e-08	3.54527e-08	1.67861e-07	2.30112e-08	0.927502	1.44806e-07	0.0724975	2.15717e-08	2.93571e-08
nearby_neuron	donor3_1.CAAGAGGGCGGAGTAC.1	2.23879e-08	9.22633e-09	3.90814e-08	1.15362e-08	1.09867e-08	0.902459	3.61045e-08	0.0907376	1.28735e-08	0.00680276
nearby_neuron	donor3_1.CAAGCAACGTCGGAGT.1	8.7245e-09	0.00495008	1.55855e-08	0.00657395	2.41335e-08	0.821093	0.0990844	0.068298	1.41898e-08	3.58599e-08
nearby_neuron	donor3_1.CAAGCGGCACATAATT.1	6.26687e-07	0.0495589	0.0315135	0.0331367	5.82452e-08	0.669741	0.0570929	0.148736	5.07568e-07	0.0102196
nearby_neuron	donor3_1.CACATGATTCAGCAAC.1	1.48209e-10	7.99694e-11	9.83089e-11	5.5701e-10	9.3846e-11	0.936346	2.27329e-10	0.0636536	7.77055e-11	9.69244e-11
nearby_neuron	donor3_1.CACCTAATCAGTTTAC.1	1.89495e-08	3.10984e-08	2.63245e-08	5.18735e-08	3.61389e-08	0.975264	4.2094e-08	0.0247357	2.25792e-08	1.02212e-07
nearby_neuron	donor3_1.CACGTCGGCAACCTCT.1	0.0185518	6.42993e-09	1.18964e-08	0.0563099	9.13478e-08	0.741339	0.0725156	0.111284	6.76696e-09	7.21254e-09
nearby_neuron	donor3_1.CACGTTCGTGCTCTAG.1	5.09668e-07	3.39228e-09	5.01646e-09	9.44035e-09	5.97035e-09	0.838694	4.765e-08	0.150051	3.43e-09	0.0112545
nearby_neuron	donor3_1.CAGCGATTCCCTTCAA.1	0.0224052	0.0139432	8.22839e-08	0.00150804	3.78096e-07	0.843855	0.0507952	0.0674931	2.32664e-08	1.14355e-07
nearby_neuron	donor3_1.CATGATGCACAATTCT.1	1.03021e-08	6.37059e-09	1.38807e-08	0.0169147	4.54209e-08	0.912754	2.18773e-07	0.0703313	1.05823e-08	9.26715e-08
nearby_neuron	donor3_1.CCACCAACTTTACTGT.1	0.00270863	1.45706e-09	6.07856e-10	0.0124062	7.83471e-10	0.910908	7.78469e-09	0.0704433	4.89467e-10	0.00353357
nearby_neuron	donor3_1.CCCGTAGCTGGGAAGA.1	4.90602e-09	0.0270864	1.84219e-07	0.0439403	5.51942e-08	0.641717	0.139985	0.147271	1.06159e-08	1.19603e-08
nearby_neuron	donor3_1.CCGCGGAATGCGTCAC.1	5.58478e-08	1.1739e-07	1.13006e-07	1.2968e-07	4.58333e-08	0.860288	0.0501969	0.0895146	4.27378e-08	1.11464e-07
nearby_neuron	donor3_1.CCGTATCTCGTCGTAG.1	0.0142867	7.9137e-08	1.47158e-07	0.00607523	1.02993e-07	0.778494	2.34601e-07	0.201144	1.7913e-07	1.16527e-07
nearby_neuron	donor3_1.CCTCTCTCCCATCTAG.1	8.43867e-10	5.89138e-10	9.3735e-10	1.03908e-09	1.48528e-09	0.869239	0.0452846	0.0854766	1.12144e-09	1.77108e-08
nearby_neuron	donor3_1.CCTGCGTTCTACGCTT.1	6.50907e-08	0.00442221	7.12006e-08	7.19741e-08	5.74092e-08	0.680329	0.174175	0.111381	6.16077e-08	0.0296932
nearby_neuron	donor3_1.CCTGGCTAGACCCGCC.1	5.67024e-07	7.09569e-07	6.91262e-07	0.0237968	1.31746e-06	0.656391	0.0775844	0.242223	4.37154e-07	6.1687e-07
nearby_neuron	donor3_1.CGAAGTTGCTCTGTGT.1	4.27381e-09	4.12583e-09	3.90868e-09	0.00624269	4.92828e-09	0.884357	0.0157408	0.0936599	5.85072e-09	1.89652e-08
nearby_neuron	donor3_1.CGAGAGCGCGTAGATA.1	4.6911e-08	1.55867e-08	4.73783e-08	7.96961e-08	2.64566e-08	0.79678	1.41452e-07	0.19482	0.00839969	5.50403e-08
nearby_neuron	donor3_1.CGCGAGTCTGCCGGGT.1	1.19581e-08	5.14677e-09	1.30084e-08	0.00170479	3.45063e-09	0.92857	0.0165202	0.0237821	0.0121824	0.0172409
nearby_neuron	donor3_1.CGCGCATGTTTGATTG.1	3.23051e-08	2.39634e-08	8.42784e-08	0.0353448	6.72359e-08	0.695304	0.172492	0.0949961	3.4863e-08	0.00186291
nearby_neuron	donor3_1.CGCGTTCATGAAATAC.1	3.54294e-09	0.0035471	8.17094e-10	7.65974e-10	3.12755e-10	0.94378	0.0174078	0.0352654	4.68489e-10	6.76215e-10
nearby_neuron	donor3_1.CGGGAATTTATGTAAA.1	1.14311e-07	0.0191057	6.14539e-08	1.01902e-07	4.79255e-08	0.801158	2.68201e-07	0.172264	2.23845e-07	0.0074713
nearby_neuron	donor3_1.CGGTACTAGAATCAAA.1	2.12901e-09	1.11615e-09	1.84869e-09	1.82145e-09	3.31556e-09	0.830388	2.94598e-09	0.169612	1.0443e-09	3.51473e-09
nearby_neuron	donor3_1.CGTTGAGCGACCGTCG.1	4.3179e-08	2.12686e-08	4.15641e-08	2.61251e-05	2.65892e-08	0.903064	1.81017e-07	0.0969098	2.28664e-08	1.19883e-07
nearby_neuron	donor3_1.CGTTTCGCTCATTACA.1	2.0566e-08	1.34893e-08	2.34133e-08	1.83475e-08	1.17692e-07	0.910393	0.015908	0.0736991	1.75057e-08	2.13522e-08
nearby_neuron	donor3_1.CGTTTGTGTAGAGGGT.1	1.4153e-09	0.0767715	1.95721e-08	2.01167e-09	1.64908e-09	0.740371	1.21698e-07	0.131855	9.3964e-10	0.0510025
nearby_neuron	donor3_1.CTAACTGGTCCGGTTC.1	2.90192e-08	0.00794351	0.0914943	0.0479069	7.3514e-08	0.598569	0.0758869	0.1782	2.88233e-08	6.99496e-08
nearby_neuron	donor3_1.CTAAGGGAATGATTGG.1	4.38476e-08	0.00750089	8.37365e-08	1.20743e-07	3.58752e-08	0.823738	7.30833e-08	0.152484	0.0162757	9.22051e-07
nearby_neuron	donor3_1.CTACTATCATAGGTTT.1	2.05205e-07	1.57598e-07	7.64121e-08	0.0108439	1.02984e-07	0.81545	0.029135	0.144571	7.40815e-08	1.46496e-07
nearby_neuron	donor3_1.CTCCCTCCTTTCGATC.1	6.3273e-10	3.8333e-10	1.21662e-09	7.8288e-10	0.00293605	0.884766	0.0242984	0.0764607	6.68051e-10	0.0115384
nearby_neuron	donor3_1.CTCGGTACCACTGCTC.1	2.55589e-09	1.52171e-09	1.63789e-09	1.14398e-08	1.0901e-09	0.914841	4.04339e-09	0.0851585	1.30566e-09	2.12495e-09
nearby_neuron	donor3_1.CTCTATTTGGCTGCAG.1	0.000664078	0.0538185	4.96218e-09	0.0492597	0.0579819	0.619939	0.0508959	0.112738	0.0235794	0.0311237
nearby_neuron	donor3_1.CTCTGGACGCCTGGTG.1	2.30943e-08	0.0094971	6.95923e-08	9.85392e-08	1.81494e-07	0.810857	1.59343e-07	0.179645	2.02474e-08	4.23162e-08
nearby_neuron	donor3_1.CTGAAAGAGATCCGAC.1	1.79867e-09	1.71417e-10	2.90335e-10	6.49469e-09	2.10432e-10	0.929825	9.10774e-10	0.0701748	2.29923e-10	5.05793e-10
nearby_neuron	donor3_1.CTGATAGTGTATCTCA.1	2.47537e-08	1.57506e-09	2.35178e-09	0.000883446	2.96268e-08	0.808899	0.108089	0.0821284	3.05927e-09	1.02312e-08
nearby_neuron	donor3_1.CTGTGCAGGGTAGGTC.1	2.55564e-10	3.34556e-10	4.1353e-10	4.75023e-09	4.24779e-10	0.890883	1.47788e-09	0.109117	3.1526e-10	4.60547e-10
nearby_neuron	donor3_1.CTTACACGGTATTCCA.1	1.25895e-09	6.94046e-10	1.66409e-09	0.0262547	5.09262e-09	0.775023	0.0591099	0.139613	9.10054e-10	2.32308e-09
nearby_neuron	donor3_1.CTTGTACTTGTTGACT.1	0.0181771	0.0309502	1.44573e-09	0.0416678	1.34329e-09	0.790187	9.70348e-09	0.119018	1.52646e-09	2.19579e-09
nearby_neuron	donor3_1.GAAAGCAGTGCACTTT.1	0.00392972	0.00109245	0.0644081	0.019169	1.41229e-08	0.740026	0.0984648	0.0729094	6.07018e-08	3.92281e-08
nearby_neuron	donor3_1.GAATGTGGTCCGGATT.1	2.00322e-08	1.51297e-08	2.58161e-08	2.01282e-07	1.74022e-08	0.906731	4.7397e-08	0.0932686	1.58372e-08	2.72997e-08
nearby_neuron	donor3_1.GAGACTGATGGGTAGA.1	1.00702e-09	1.70807e-09	2.17061e-09	0.0207902	4.53717e-10	0.821351	0.0445415	0.113318	5.17577e-10	1.21632e-09
nearby_neuron	donor3_1.GAGAGGGCGCGAGGTT.1	3.18806e-08	6.05314e-08	4.46504e-08	3.6257e-08	3.5585e-08	0.941561	3.60917e-07	0.0584385	2.65502e-08	7.50487e-08
nearby_neuron	donor3_1.GATATGAGACACTAAC.1	3.91073e-09	1.15075e-09	1.69714e-09	1.57666e-09	1.38903e-09	0.950208	8.67771e-09	0.049792	1.14691e-09	2.44585e-09
nearby_neuron	donor3_1.GATCGACACTATCTGA.1	2.38587e-08	7.54677e-08	2.35168e-07	0.0594763	0.00041693	0.611191	0.139582	0.189333	4.87325e-08	6.73747e-07
nearby_neuron	donor3_1.GATGCTGTATTTCATC.1	1.19282e-09	1.47836e-09	1.2065e-09	0.00188381	9.63048e-10	0.85314	3.35733e-09	0.144977	7.54181e-10	1.9052e-09
nearby_neuron	donor3_1.GCCCAGTTGGTATGCC.1	1.82296e-09	1.29997e-09	1.13149e-09	5.42389e-10	0.00270797	0.866579	0.0305122	0.100201	6.33383e-10	1.23897e-09
nearby_neuron	donor3_1.GCGAGTTCTGCAAAGA.1	1.79475e-06	8.62085e-07	8.32778e-07	9.34303e-07	5.86675e-07	0.834038	1.36534e-06	0.165954	4.4116e-07	1.12096e-06
nearby_neuron	donor3_1.GCGGAGAAACTTCGCA.1	2.38906e-08	1.65928e-08	0.00871389	0.0523189	1.62383e-08	0.72584	0.01052	0.202608	3.21425e-08	4.3186e-08
nearby_neuron	donor3_1.GCTGCACGGTTTCTTA.1	2.03756e-09	5.9318e-10	1.13903e-09	1.56049e-09	7.14317e-10	0.890702	4.0388e-09	0.109298	6.36607e-10	3.31278e-09
nearby_neuron	donor3_1.GGAGTGCCGCCCTGGA.1	6.26978e-10	0.0226886	6.79133e-09	0.0225347	1.35374e-09	0.77927	0.118253	0.0572535	3.55216e-09	1.3864e-08
nearby_neuron	donor3_1.GGATCTTGACTCAACC.1	6.49804e-08	0.00871498	9.0129e-08	0.0311332	8.74105e-08	0.803354	0.0327274	0.12407	7.55051e-08	4.47583e-08
nearby_neuron	donor3_1.GGCAAAGGCGCCAATA.1	1.10467e-07	3.90108e-08	7.0269e-08	0.00973025	7.53978e-08	0.883491	0.0344489	0.0723295	3.88432e-08	2.29346e-07
nearby_neuron	donor3_1.GGCAAGGCGAAATAGC.1	2.17819e-08	8.88215e-09	2.20929e-08	8.822e-08	8.7417e-05	0.864411	1.15991e-06	0.120674	3.37557e-08	0.0148264
nearby_neuron	donor3_1.GGCGCGTTCGAGTTTA.1	6.0831e-10	0.0291642	0.0115799	0.0356843	0.0148134	0.628025	0.152274	0.127326	0.00113316	6.89364e-10
nearby_neuron	donor3_1.GGGACCCGTATATCTT.1	0.104439	2.02272e-08	0.203188	0.040625	9.45864e-09	0.544628	2.82263e-08	0.105145	0.001975	9.36163e-08
nearby_neuron	donor3_1.GGGAGTTAATGAGGCG.1	3.49477e-10	2.24259e-10	3.33683e-10	4.37677e-10	2.10244e-10	0.967146	4.13738e-10	0.0328542	1.88158e-10	3.29976e-10
nearby_neuron	donor3_1.GGGCGATATGTGTGAA.1	0.0137307	0.0228208	7.17329e-08	6.93962e-08	0.00742793	0.741428	0.00495955	0.209633	2.76081e-08	7.42814e-08
nearby_neuron	donor3_1.GGGCGGCAAATGAATT.1	9.47911e-10	3.19284e-10	3.44362e-10	1.20834e-09	7.62511e-10	0.905748	0.0171313	0.0771211	3.93495e-10	6.70506e-10
nearby_neuron	donor3_1.GGTGATAAGGAGCAGT.1	1.88147e-07	1.78943e-08	2.51068e-08	2.28264e-08	1.35114e-08	0.933293	3.30522e-08	0.0667069	3.27558e-08	1.85147e-08
nearby_neuron	donor3_1.GGTGCTGATCACAAAG.1	1.67124e-09	6.94052e-10	0.0326824	0.0135726	2.83544e-09	0.715993	0.0258277	0.211924	1.28958e-09	1.6816e-09
nearby_neuron	donor3_1.GGTTAGGCTTGGAGAA.1	2.02253e-10	1.80578e-10	3.3186e-10	0.00338745	3.61102e-10	0.78637	0.0494055	0.160837	1.90541e-10	2.99056e-10
nearby_neuron	donor3_1.GTACAGAGGCAAGGGT.1	4.93336e-10	1.55169e-10	2.62218e-10	2.38521e-10	6.27588e-10	0.989896	7.98752e-10	0.0101042	2.42318e-10	3.34137e-10
nearby_neuron	donor3_1.GTACGCTTCATTGCAC.1	1.04994e-07	0.00950194	3.20046e-08	2.90822e-08	1.59289e-08	0.80046	0.0831188	0.106919	1.52276e-08	3.16236e-07
nearby_neuron	donor3_1.GTACGTTTGCCCGTCA.1	2.74886e-08	0.0222307	1.02627e-07	0.0107456	3.09269e-08	0.754567	0.0649026	0.147554	4.68621e-08	5.74435e-08
nearby_neuron	donor3_1.GTCGGATATCTCAGAC.1	5.8513e-08	1.17142e-07	8.10203e-08	0.0302976	0.00246995	0.840568	4.31673e-07	0.119802	0.00686106	2.71287e-07
nearby_neuron	donor3_1.GTGAGCGTGCTGCACT.1	1.45071e-09	0.0334076	3.75583e-09	0.0157487	2.54823e-09	0.653442	1.66618e-08	0.297402	1.51333e-09	1.63693e-09
nearby_neuron	donor3_1.GTGCGGGTCTCCAAAT.1	1.06752e-09	0.0202633	1.77372e-09	1.38377e-08	7.21644e-09	0.75583	0.124888	0.099019	1.54767e-09	1.3096e-09
nearby_neuron	donor3_1.GTGCGTGTATATGAGC.1	1.20153e-09	2.14008e-09	2.08059e-09	1.22083e-09	1.88206e-09	1	3.31416e-09	1.15701e-08	1.55973e-09	2.0174e-09
nearby_neuron	donor3_1.GTGGCAAACAGCGGCA.1	0.00797292	7.65482e-10	1.06773e-09	2.43251e-09	1.26161e-09	0.843229	2.05036e-09	0.144616	0.0041816	2.0019e-09
nearby_neuron	donor3_1.GTGGTATAGTCTGCCG.1	1.96793e-08	2.19021e-08	2.9143e-08	0.0770355	1.63102e-08	0.640938	5.24061e-08	0.282026	2.15929e-08	4.58557e-08
nearby_neuron	donor3_1.GTTGCACGGAGTTTCG.1	0.000425681	1.32376e-07	0.0106241	1.24288e-07	0.117307	0.724176	0.0443231	0.103144	9.42632e-08	1.14923e-07
nearby_neuron	donor3_1.GTTTCTGCAGTCTCCC.1	5.23881e-08	2.48442e-08	4.69092e-08	3.97496e-08	7.99353e-08	0.915618	0.014604	0.0697777	3.31621e-08	5.51218e-08
nearby_neuron	donor3_1.GTTTGACCAAATCCTA.1	6.82545e-08	2.07912e-08	5.58766e-08	6.12234e-08	0.00427038	0.950873	1.64211e-07	0.0448565	5.73173e-08	3.96335e-08
nearby_neuron	donor3_1.GTTTGGCCCAAGTTAT.1	4.92595e-10	4.45256e-10	8.10111e-10	7.50246e-10	2.80652e-10	0.90471	9.12688e-10	0.0952902	8.71348e-10	1.93974e-09
nearby_neuron	donor3_1.TAACAAAGGGAGAAGC.1	0.00588786	6.7893e-10	5.3919e-10	1.24144e-09	4.01891e-10	0.817953	0.00999274	0.166166	6.17871e-10	5.51268e-10
nearby_neuron	donor3_1.TAACATACACGCGATC.1	6.07599e-05	7.86223e-08	4.42333e-07	0.0283989	7.32249e-08	0.851772	5.35138e-07	0.119766	2.06409e-07	3.08928e-07
nearby_neuron	donor3_1.TACCAGAAGTAGGTTC.1	2.98243e-08	3.07232e-08	3.344e-08	5.69045e-08	4.6915e-08	0.769007	0.100704	0.130289	2.13072e-08	2.3213e-07
nearby_neuron	donor3_1.TACCGGCTCACTGCCC.1	4.06302e-08	1.58835e-08	2.63316e-08	0.0379439	1.64469e-08	0.761763	0.0830681	0.117224	1.93409e-08	6.69148e-08
nearby_neuron	donor3_1.TACGACTGCCTCTTAG.1	5.90807e-08	6.05306e-08	1.29132e-07	0.00599394	5.48457e-08	0.827897	0.0185636	0.147545	5.92017e-08	1.56627e-07
nearby_neuron	donor3_1.TACGTGCACTATGCTG.1	6.15656e-08	2.31761e-08	2.20127e-08	3.88142e-08	2.66902e-08	0.785356	0.0504622	0.164182	1.90082e-08	1.47456e-08
nearby_neuron	donor3_1.TAGCTCGCCTGATAAC.1	1.56325e-09	0.0353241	8.2745e-10	0.0187184	4.52167e-10	0.760001	0.0483351	0.137621	6.76435e-10	1.77539e-09
nearby_neuron	donor3_1.TCAAACAACCGCGTCG.1	0.00843151	1.66866e-09	2.39825e-09	1.96255e-09	0.016203	0.833322	0.142044	1.12444e-08	1.0536e-09	1.26146e-08
nearby_neuron	donor3_1.TCCAACTTTAAATTCT.1	1.49104e-08	2.00799e-08	2.03422e-08	1.71955e-08	1.31501e-08	0.99446	1.99215e-08	0.00509791	2.78408e-08	0.000442234
nearby_neuron	donor3_1.TCGAAATTTAGGACCA.1	1.11083e-08	1.16604e-08	4.55832e-08	0.018452	1.61588e-08	0.727638	0.0560226	0.173927	2.19299e-08	0.0239609
nearby_neuron	donor3_1.TCGCCGCACCGCGTGA.1	3.97094e-08	6.54128e-08	4.10721e-08	0.0254834	1.28376e-07	0.843049	0.0351147	0.0893382	5.30389e-08	0.00701411
nearby_neuron	donor3_1.TCGTCAAGTACGCGCA.1	6.12726e-09	3.50423e-09	7.57985e-09	0.0601935	7.55387e-09	0.677657	0.121738	0.134529	0.00588216	1.10418e-08
nearby_neuron	donor3_1.TCTAGCATGCCCAGAA.1	0.0155238	0.00180163	1.79288e-07	0.0402538	2.82798e-07	0.668093	0.114265	0.160062	2.25756e-07	3.22476e-07
nearby_neuron	donor3_1.TCTCTAATAGCTGGTA.1	1.59229e-09	3.9381e-08	6.60521e-09	0.0384794	2.16837e-09	0.695369	0.0418662	0.224285	6.99859e-10	1.40527e-09
nearby_neuron	donor3_1.TCTGGGTAGCGCTCAT.1	1.08835e-10	5.24785e-11	6.95401e-11	0.0107481	8.02855e-11	0.900552	7.52108e-10	0.0886998	5.92148e-11	2.05177e-10
nearby_neuron	donor3_1.TCTTACGGCATCCGAC.1	0.00906645	2.86759e-07	0.0174754	3.76134e-08	2.1724e-08	0.83668	0.0118442	0.122978	3.37819e-08	0.00195637
nearby_neuron	donor3_1.TGATCTCCGGCGCCAG.1	0.00906638	0.0287049	0.00271627	0.0385479	0.0606196	0.640742	0.0209822	0.19862	4.48407e-08	2.56573e-07
nearby_neuron	donor3_1.TGCCAGTACGTGGAGA.1	4.91146e-09	0.0751119	0.00460999	0.0640707	6.45706e-08	0.616589	0.050479	0.170372	0.0187672	1.57503e-08
nearby_neuron	donor3_1.TGCGAGAATATTACCC.1	0.0185263	0.00639186	0.000556932	0.0260492	0.0658433	0.698834	0.0934152	0.0858682	0.00451534	3.61136e-10
nearby_neuron	donor3_1.TGCGTTTGTTGACACT.1	2.22716e-10	1.07154e-08	1.21382e-10	9.14903e-11	1.18364e-10	0.858995	1.47979e-10	0.141005	1.23728e-10	1.29101e-10
nearby_neuron	donor3_1.TGGAGTGATGCGATGA.1	3.53513e-08	9.62753e-09	3.47754e-08	4.20294e-08	1.64041e-08	0.871771	0.0767322	0.0514963	1.12168e-08	3.40145e-08
nearby_neuron	donor3_1.TTAACACCTCGAACAT.1	1.47908e-07	0.00290251	1.64058e-08	0.0113084	2.99855e-07	0.783552	0.0238096	0.178427	1.49893e-08	2.49551e-08
nearby_neuron	donor3_1.TTAAGCGCCTGACCCA.1	4.35674e-07	0.00346424	0.0274874	0.0242751	5.57137e-06	0.786212	0.0724586	0.0805132	0.00481122	0.00077177
nearby_neuron	donor3_1.TTATCGCCTGCGAAGC.1	7.64889e-07	1.61591e-07	0.0295809	1.7911e-07	0.0245043	0.875798	4.40916e-07	0.0701151	1.04917e-07	2.486e-07
nearby_neuron	donor3_1.TTATCTGTATCATAAC.1	3.57272e-09	4.40098e-09	1.48537e-08	0.024664	0.0209738	0.688155	0.0316181	0.234589	3.87166e-09	5.24697e-09
nearby_neuron	donor3_1.TTCACGAAAGGATCAC.1	3.91016e-10	2.00894e-10	2.98349e-10	2.02283e-10	3.47994e-10	1	4.40188e-10	3.08447e-09	2.48762e-10	3.75071e-10
nearby_neuron	donor3_1.TTCCAATCTGGCTATC.1	2.22926e-08	1.63299e-08	4.86812e-08	2.71505e-08	2.93714e-08	0.825511	0.133821	0.0406675	1.07535e-07	6.11011e-08
nearby_neuron	donor3_1.TTCCACACAGATTTGA.1	1.23305e-07	7.57254e-07	4.85746e-07	0.0405627	0.0407377	0.681997	0.0385911	0.195595	9.90817e-08	0.00251448
nearby_neuron	donor3_1.TTCGACAGAGCCCGTG.1	6.64484e-10	5.37742e-10	9.50118e-10	0.0396529	1.15534e-09	0.84939	0.0148004	0.0961567	7.62387e-10	1.1894e-09
nearby_neuron	donor3_1.TTGAATATGGACTTTC.1	1.63125e-09	1.29444e-09	2.61904e-09	0.00639833	1.57524e-09	0.883184	3.39077e-09	0.110418	1.28445e-09	2.64006e-09
nearby_neuron	donor3_1.TTGATTATGCAGATGA.1	6.70769e-10	0.00913248	8.92962e-10	8.4045e-10	1.17901e-09	0.826534	0.0634092	0.100924	6.45187e-10	8.39089e-10
nearby_neuron	donor3_1.TTGCCATAGCCCGCTC.1	2.20054e-08	2.37789e-08	5.98311e-08	4.29982e-08	0.0274834	0.785754	0.0546623	0.115752	2.46517e-08	0.0163479
nearby_neuron	donor3_1.TTGCTCCCATACCGGA.1	9.24206e-07	5.42455e-07	1.81153e-07	9.89297e-08	1.06925e-07	0.952221	1.81418e-07	0.0335872	0.014189	3.17786e-07
nearby_neuron	donor3_1.TTGGATATCGTCTACG.1	1.12772e-09	9.62076e-10	2.37199e-09	0.0161469	9.03345e-10	0.863969	0.0215785	0.0983054	1.81459e-09	2.05361e-09
nearby_neuron	donor3_1.TTGGTCACACTCGTAA.1	1.29353e-08	2.96445e-08	0.0575293	0.0118295	1.67889e-07	0.799032	0.0787047	0.0529043	2.98933e-08	1.1747e-07
nearby_neuron	donor3_1.TTGTCGTTCAGTTACC.1	2.77596e-08	1.51379e-07	2.05659e-07	0.0541691	0.0154881	0.828774	3.33575e-07	0.101568	5.87039e-08	6.21018e-08
nearby_neuron	donor3_1.TTGTTAGCAAATTCGA.1	0.0103923	0.00659493	0.0487566	0.0822827	0.0239735	0.570412	0.104467	0.153121	2.57325e-09	2.38109e-09
nearby_neuron	donor3_2.AAACTGCTGGCTCCAA.1	0.00957971	5.43488e-10	4.96694e-09	4.85744e-10	1.53649e-09	0.880858	0.0254078	0.0841542	5.80541e-10	1.56334e-09
nearby_neuron	donor3_2.AAATTACCTATCGATG.1	3.4693e-08	3.77647e-08	5.5715e-08	4.33131e-08	5.40036e-08	0.872401	0.0125103	0.115088	1.41542e-07	9.73143e-08
nearby_neuron	donor3_2.AACGATATGTCAACTG.1	1.20869e-08	4.31037e-09	8.82707e-09	0.0120193	3.78892e-08	0.802035	0.0131794	0.172766	7.22962e-09	1.92783e-08
nearby_neuron	donor3_2.AAGATTGGCGGAACGT.1	1.15212e-08	7.61071e-09	1.38312e-08	0.0385218	1.13144e-08	0.687378	0.0552785	0.218822	8.68615e-09	1.06739e-08
nearby_neuron	donor3_2.AATTAAAGGTCGGCGT.1	3.08877e-08	5.23763e-09	5.61199e-09	0.0012887	1.04338e-08	0.936675	0.00884427	0.0531922	3.82029e-09	1.04769e-08
nearby_neuron	donor3_2.ACACACCAGGACCAGT.1	0.00522134	1.32018e-10	2.91701e-10	0.0309628	3.66649e-10	0.843381	0.0354697	0.0849655	1.23412e-10	3.82616e-10
nearby_neuron	donor3_2.ACTCTTGTATAGTAAC.1	8.51404e-10	1.83366e-10	6.94125e-10	0.00971322	9.57145e-05	0.896189	3.92692e-09	0.0940022	3.27266e-10	1.87082e-09
nearby_neuron	donor3_2.AGACCATGGGATACAA.1	7.61055e-07	4.55039e-07	8.34325e-07	1.11242e-06	5.93359e-07	0.928054	1.80333e-06	0.0719392	4.49382e-07	9.07429e-07
nearby_neuron	donor3_2.AGCTCTTCCCAGTGCA.1	0.00435444	0.00469159	1.48001e-08	2.98853e-08	9.07347e-09	0.79963	0.0100984	0.181226	6.95467e-09	2.80002e-08
nearby_neuron	donor3_2.AGCTGAAGTAAACCAA.1	6.18995e-10	7.05132e-10	1.17745e-09	0.0259048	0.0901051	0.734568	0.0702156	0.066238	8.27891e-10	0.0129686
nearby_neuron	donor3_2.AGGATATAGGGATTTA.1	0.00202143	0.000125842	0.000120378	0.0521996	7.6615e-05	0.749189	0.0392891	0.152739	8.53551e-05	0.00415318
nearby_neuron	donor3_2.AGGCAGATGCGTAAAC.1	6.67259e-08	2.69269e-08	9.67183e-08	3.95593e-08	1.47008e-07	0.900098	7.93099e-07	0.0999001	1.92464e-07	2.01652e-07
nearby_neuron	donor3_2.AGGTTGAGGCACGCTT.1	2.35303e-08	8.28759e-07	1.9848e-08	2.24283e-08	0.00941356	0.812861	0.0041814	0.163649	1.19779e-08	0.00989334
nearby_neuron	donor3_2.AGTATAATACTAGGCA.1	2.46997e-10	0.00948381	8.252e-10	0.0356619	9.78801e-11	0.765038	0.00602759	0.183789	1.25776e-09	2.03564e-10
nearby_neuron	donor3_2.AGTGATTCAAGCAGGA.1	0.00385093	1.64e-10	3.21729e-10	3.63477e-10	3.51259e-10	0.917833	3.62813e-09	0.0783161	1.76894e-10	3.37432e-10
nearby_neuron	donor3_2.ATACGTACTTAGCCAC.1	1.10829e-09	1.41591e-09	3.09255e-09	2.32497e-08	2.01292e-09	0.968468	1.38685e-08	9.26668e-09	9.45209e-10	0.031532
nearby_neuron	donor3_2.ATACTGCCTTACACCG.1	1.07082e-07	1.46215e-08	3.20544e-08	2.19096e-07	1.9024e-08	0.902379	1.34232e-07	0.0413519	0.0545579	0.00171087
nearby_neuron	donor3_2.ATAGACAACGGGACCT.1	0.00805736	2.10185e-09	1.43785e-09	0.00121005	9.15928e-10	0.885825	7.68494e-09	0.102223	1.10085e-09	0.00268452
nearby_neuron	donor3_2.ATAGACGAAGAGAAAG.1	0.00787417	0.0235052	1.17751e-09	7.60516e-10	3.8584e-09	0.916838	1.84595e-09	0.0517824	1.34716e-09	4.75587e-10
nearby_neuron	donor3_2.ATAGAGTTATCAACTT.1	1.04062e-07	4.08962e-08	0.00612078	0.0208613	0.0158532	0.709113	0.0741057	0.16665	0.00729624	1.13745e-07
nearby_neuron	donor3_2.ATATCTCCCTCGTTAA.1	0.0056464	1.75418e-09	6.50537e-10	4.74088e-10	2.27239e-10	0.942507	0.0068309	0.0450153	4.02763e-10	2.15042e-09
nearby_neuron	donor3_2.ATCTGTAATTGTACCC.1	7.16937e-11	2.21443e-09	8.04835e-11	7.5792e-11	0.00563096	0.903803	3.58043e-10	0.090566	1.68264e-10	7.29068e-11
nearby_neuron	donor3_2.ATGCTCAGTGTTGCAT.1	4.67676e-10	2.66601e-10	3.82988e-10	5.22205e-10	2.62249e-10	0.974051	1.27259e-09	0.0259487	1.80122e-10	4.27642e-10
nearby_neuron	donor3_2.ATTACTTACTGGGCAT.1	1.84448e-10	1.7873e-10	3.55014e-10	0.00466038	2.00937e-10	0.966978	3.6704e-10	0.0283613	2.88925e-10	3.12122e-10
nearby_neuron	donor3_2.ATTGCTGCTCCTCCAT.1	1.23174e-08	1.00483e-08	1.78586e-08	0.00255012	2.81735e-08	0.866698	0.0216469	0.109105	1.29395e-08	6.28656e-08
nearby_neuron	donor3_2.CAAGATATTATAACGT.1	0.00703816	1.02912e-09	2.9614e-09	0.0202546	5.89572e-09	0.864557	0.0191487	0.0890011	1.09825e-09	3.99633e-09
nearby_neuron	donor3_2.CACATTCTTTCGATGG.1	1.89111e-08	1.31565e-08	1.51779e-08	0.00481682	0.000201343	0.798581	0.00199963	0.194401	9.55534e-09	1.70386e-08
nearby_neuron	donor3_2.CACTTCGCCACAGGCT.1	2.64171e-08	2.65546e-08	3.88768e-08	4.68387e-08	3.42999e-08	0.888515	3.60992e-08	0.111485	5.3145e-08	3.26237e-08
nearby_neuron	donor3_2.CAGACACCGATCGCTG.1	3.03309e-09	4.78556e-09	4.89297e-09	0.0356354	2.74806e-09	0.819277	1.00581e-08	0.145088	3.21597e-09	6.11025e-09
nearby_neuron	donor3_2.CAGATACTAACATAGT.1	6.99061e-10	0.00170113	1.3491e-09	3.04867e-10	6.44498e-10	0.982119	9.053e-10	1.62176e-08	0.0161802	4.68688e-10
nearby_neuron	donor3_2.CAGCTCACTGAGACAT.1	1.57007e-07	0.0334205	2.26712e-07	0.0116051	8.91524e-08	0.791884	0.0250462	0.120905	8.89584e-08	0.0171386
nearby_neuron	donor3_2.CAGTCGAGGATGCAAT.1	1.224e-07	4.86446e-09	1.16714e-08	7.35316e-09	6.84459e-09	0.923899	7.24147e-08	0.0761011	6.6737e-09	8.94745e-09
nearby_neuron	donor3_2.CATGAGATGCACTCTC.1	2.51415e-09	7.66563e-09	5.22779e-09	0.0384464	7.89775e-10	0.933946	6.05768e-09	0.0276074	1.24909e-09	2.10861e-09
nearby_neuron	donor3_2.CCAATAGTGCCGTCGA.1	0.00271384	6.03648e-09	1.12842e-08	0.0131877	6.16822e-09	0.836653	7.05771e-08	0.147446	5.18711e-09	1.59017e-08
nearby_neuron	donor3_2.CCAATTACGGGTCGAG.1	0.00101511	1.77114e-10	3.68735e-10	2.31368e-10	2.89721e-10	0.980395	9.03125e-10	0.0185894	7.36097e-10	3.40988e-10
nearby_neuron	donor3_2.CCACACTGAGATATTA.1	0.0102835	3.30367e-08	7.27459e-08	0.0198584	6.43222e-08	0.880163	1.75928e-07	0.0896944	4.71965e-08	1.3591e-07
nearby_neuron	donor3_2.CCACCCAAGGAAAGTG.1	1.7055e-09	1.25061e-09	2.17233e-09	0.015598	7.93834e-09	0.866737	0.0255044	0.0921602	1.31582e-09	9.37248e-09
nearby_neuron	donor3_2.CCAGTAGTCTGATCCA.1	6.66599e-11	3.69147e-10	1.01539e-10	0.0162281	7.45552e-11	0.829962	0.0316833	0.122126	4.61918e-10	2.0593e-10
nearby_neuron	donor3_2.CCAGTCTAGACGGCGC.1	7.04395e-11	0.00286687	1.11239e-10	2.09069e-10	8.07137e-11	0.872696	1.57295e-09	0.120882	1.42525e-10	0.00355444
nearby_neuron	donor3_2.CCATTAGCGATAATCC.1	0.00415236	3.70195e-08	8.11992e-08	0.017117	3.13764e-08	0.795688	7.93019e-07	0.183041	3.01453e-08	4.83211e-08
nearby_neuron	donor3_2.CCGCGGGTACGAAGAA.1	0.00205621	7.95562e-10	1.46617e-09	2.89821e-09	1.74697e-09	0.87331	4.13147e-09	0.124634	8.19677e-10	1.62938e-09
nearby_neuron	donor3_2.CCGTTACGTTAGAACA.1	2.02993e-08	2.0211e-08	4.08766e-08	0.0454958	1.34138e-08	0.747325	0.0713577	0.135821	1.5336e-08	3.27361e-08
nearby_neuron	donor3_2.CCTAAATTAACGGTTC.1	0.0144301	4.16596e-10	1.58964e-09	0.0168851	5.50537e-10	0.874045	0.0162902	0.07835	6.30211e-10	1.75348e-09
nearby_neuron	donor3_2.CCTAACTAAGGCTCTA.1	3.08608e-10	2.85221e-09	2.44851e-09	0.0116627	3.92655e-10	0.741572	1.56074e-09	0.232735	0.00687145	0.00715881
nearby_neuron	donor3_2.CCTACTGCTTACACTT.1	1.05764e-10	0.0362301	2.58844e-10	7.37555e-10	1.01792e-10	0.753289	0.00896299	0.201518	1.44573e-10	2.28481e-10
nearby_neuron	donor3_2.CCTCCGACAATTCAAG.1	2.03129e-09	7.51301e-09	3.19562e-09	3.50767e-09	1.23656e-09	0.926651	3.16663e-09	0.0733491	2.45927e-09	1.85485e-09
nearby_neuron	donor3_2.CGAAGTTGCTCTGTGT.1	0.00174983	2.17838e-10	2.72377e-10	1.39371e-10	0.0181567	0.782601	3.13797e-09	0.197492	1.44872e-10	4.78293e-10
nearby_neuron	donor3_2.CGCGACCGCGACAGAT.1	1.07995e-09	7.58564e-10	3.04633e-09	0.0529148	1.47432e-09	0.835514	0.0114929	0.100078	1.10162e-09	1.78028e-09
nearby_neuron	donor3_2.CGGAGCATGGCGATCC.1	3.92819e-10	3.48367e-10	9.6528e-10	0.0301799	4.06374e-10	0.80062	0.00748576	0.161714	5.85549e-10	5.02141e-10
nearby_neuron	donor3_2.CGGAGTTTGAGAGACA.1	5.90414e-08	0.0107319	8.72539e-08	0.0225085	5.42621e-08	0.75886	1.4366e-07	0.207899	6.80859e-08	2.02081e-07
nearby_neuron	donor3_2.CGGTAGAGGTGCAGGT.1	5.29452e-08	0.00496223	1.13661e-07	0.00926635	8.00181e-08	0.80168	1.9549e-06	0.174525	0.00956425	5.50422e-07
nearby_neuron	donor3_2.CGTTTCACTTCGGGCG.1	0.00805079	5.57901e-07	5.48086e-07	0.0225649	6.2396e-06	0.666353	0.0510763	0.251947	2.36129e-07	2.40452e-07
nearby_neuron	donor3_2.CTATCGGGTCTCAACA.1	0.000863717	2.63865e-08	1.71622e-07	0.0387157	2.80034e-08	0.703586	0.00193743	0.254897	3.18029e-08	3.42134e-07
nearby_neuron	donor3_2.CTCGAGGTCGAACAGT.1	0.00107336	0.0114861	8.89962e-09	3.19548e-07	7.25385e-09	0.909084	1.07049e-07	0.0783559	4.65791e-09	9.30816e-09
nearby_neuron	donor3_2.CTCTGGACGCCTGGTG.1	2.24583e-07	0.0108362	8.5135e-08	6.1086e-08	1.08843e-07	0.894939	7.82943e-07	0.0942234	1.30947e-07	3.27193e-07
nearby_neuron	donor3_2.CTTGCCCAGGCTCTAC.1	2.95322e-08	4.47833e-08	4.63973e-08	2.49969e-08	4.74231e-08	0.940466	1.49454e-07	0.0595337	2.6521e-08	3.79926e-08
nearby_neuron	donor3_2.CTTGTGCTCACCGATT.1	7.53472e-08	1.06873e-07	6.67632e-08	0.00771843	5.13256e-08	0.857898	1.31181e-06	0.134382	4.48007e-08	3.44499e-07
nearby_neuron	donor3_2.CTTTAGGAACACTGTT.1	3.07833e-07	0.0176383	1.29123e-08	2.88479e-08	6.09235e-09	0.973338	7.06165e-08	0.00902219	6.41773e-07	1.89861e-08
nearby_neuron	donor3_2.GAAAGTGACTAACTGC.1	1.40693e-08	3.59213e-09	5.60352e-09	0.00174045	6.30341e-09	0.894301	0.00449796	0.0994606	4.89772e-09	8.36567e-09
nearby_neuron	donor3_2.GAACGTCTCATGGTCG.1	0.0106789	1.63904e-09	8.12029e-09	3.69901e-09	1.362e-09	0.873493	0.0294417	0.0239094	0.0142218	0.0482554
nearby_neuron	donor3_2.GAGGGCGCAGCTCTGC.1	9.2279e-11	2.95829e-11	6.49608e-11	0.00532123	4.29404e-11	0.861037	5.14579e-10	0.132361	3.60791e-11	0.00128173
nearby_neuron	donor3_2.GATCGACACTATCTGA.1	3.28727e-10	2.43277e-10	4.60339e-10	0.00439767	2.46579e-10	0.955976	1.22918e-09	0.0396263	2.87218e-10	1.23798e-09
nearby_neuron	donor3_2.GCAAGTGCACAGAGAA.1	1.82426e-07	2.96382e-07	1.87688e-07	2.38684e-07	2.81038e-07	0.894797	4.04448e-07	0.105201	1.37143e-07	2.31078e-07
nearby_neuron	donor3_2.GCCAATAGGGCATCTC.1	4.21149e-08	1.95242e-08	6.28691e-08	0.00597944	0.00295594	0.898215	2.30686e-06	0.0928473	3.56147e-08	1.02778e-07
nearby_neuron	donor3_2.GCCGAAATTCCTACGT.1	1.76421e-08	1.09398e-08	1.96333e-08	3.56386e-08	9.02289e-09	0.841497	3.26284e-08	0.158503	1.54209e-08	2.07233e-08
nearby_neuron	donor3_2.GCGCCGTTCCACGATA.1	0.00582776	0.00382488	4.71976e-07	8.39326e-07	3.53356e-07	0.753586	4.93679e-07	0.236758	3.95396e-07	2.83744e-07
nearby_neuron	donor3_2.GCGCGTCATTGGTACA.1	1.89315e-09	1.43274e-10	1.53598e-10	0.0163519	1.42433e-10	0.919755	0.0099504	0.0539428	9.67317e-11	1.84163e-10
nearby_neuron	donor3_2.GCGCTGATCCAGACTC.1	0.00278257	2.5302e-10	4.49454e-10	0.0271989	2.65814e-10	0.846343	5.95847e-09	0.123675	2.25937e-10	5.25933e-10
nearby_neuron	donor3_2.GCTGAGGCGTGAGTAT.1	4.4942e-10	4.17687e-10	9.26308e-10	0.0286554	4.76434e-10	0.836762	0.0249131	0.100864	7.1492e-10	0.00880525
nearby_neuron	donor3_2.GGCACTCCACTGGGCA.1	3.02061e-09	7.40285e-10	1.80697e-09	1.00208e-09	8.52273e-10	0.733681	0.00311786	0.263201	6.73006e-10	4.21294e-09
nearby_neuron	donor3_2.GGCGGAGTAATATTAG.1	0.00449305	1.37883e-09	1.97868e-09	0.00202189	3.094e-09	0.871599	0.0199291	0.101957	1.19845e-09	6.77315e-09
nearby_neuron	donor3_2.GGCGTCCTATCCGCTG.1	5.67569e-09	0.000368017	1.37966e-09	0.00853946	4.64786e-10	0.949461	0.00304923	0.0330031	1.95176e-08	0.00557945
nearby_neuron	donor3_2.GGGTCACCGTGACGGT.1	5.40025e-09	4.54988e-09	6.36426e-09	1.64508e-09	1.04694e-08	0.823536	0.0346605	0.131168	0.0106347	3.22438e-09
nearby_neuron	donor3_2.GGTAGACCGTTGGGCG.1	4.59519e-09	0.0269749	0.0137854	0.0270748	1.61677e-09	0.89773	1.53002e-08	0.0344352	3.51716e-09	6.98472e-09
nearby_neuron	donor3_2.GGTATTGCCGAGTTTA.1	0.00491241	0.00353551	1.01856e-08	8.97689e-09	8.62675e-09	0.91675	0.00392039	0.0660068	8.62929e-09	0.00487498
nearby_neuron	donor3_2.GGTGGACTGCTCTGGC.1	6.01117e-08	5.99958e-08	6.74755e-08	0.0206113	6.47363e-08	0.933814	0.0220663	0.0110371	6.27907e-08	0.0124705
nearby_neuron	donor3_2.GTAGCGGCTATACACT.1	6.31883e-08	0.00123107	4.24565e-08	0.00673963	4.924e-08	0.883474	1.51231e-07	0.108555	6.77358e-08	1.02885e-07
nearby_neuron	donor3_2.GTATAGGACTCAGTAG.1	5.39055e-10	7.17033e-10	3.8298e-10	3.063e-10	4.57182e-10	0.916484	6.23811e-10	0.0835156	2.75137e-10	4.30232e-10
nearby_neuron	donor3_2.GTCAAGCGGACTCGGG.1	1.20933e-08	6.47573e-09	1.63689e-08	0.00113793	0.00852378	0.859721	1.68312e-08	0.118427	1.59454e-08	0.0121907
nearby_neuron	donor3_2.GTGCGGGTCTCCAAAT.1	8.59506e-11	0.0172624	8.99161e-11	1.22009e-10	0.00766708	0.928751	1.96705e-10	0.0463196	8.44248e-11	1.2263e-10
nearby_neuron	donor3_2.GTGTCGTATAGCGTTC.1	0.00730719	6.38278e-08	6.59768e-08	0.00282451	2.15948e-06	0.892326	0.0394991	0.0580401	1.85356e-07	1.51284e-07
nearby_neuron	donor3_2.GTTGGATTTGCGTTGG.1	1.45178e-08	9.01264e-09	1.41905e-08	2.66037e-08	2.06964e-08	0.8832	0.0257773	0.091023	1.97732e-08	3.74073e-08
nearby_neuron	donor3_2.TAAATGAATCCGTTTC.1	5.33e-09	2.51124e-09	3.40855e-09	0.00160134	2.18104e-09	0.866895	5.87867e-09	0.131504	4.16962e-09	5.13389e-09
nearby_neuron	donor3_2.TACCAATAAAGTACCA.1	0.013762	4.73122e-09	3.04572e-08	0.0522401	2.41279e-09	0.850829	0.0548926	0.00530944	0.022967	1.42548e-08
nearby_neuron	donor3_2.TACGGGATGCTAGCAG.1	7.90773e-08	1.88296e-08	8.00194e-08	0.00594758	0.0157942	0.727774	4.77438e-08	0.250484	2.01069e-08	1.85758e-08
nearby_neuron	donor3_2.TAGACGCCCGTACCGG.1	0.0127163	5.73623e-09	1.3471e-08	0.0198131	7.5031e-08	0.872806	3.84565e-08	0.0946647	8.23942e-09	1.55638e-08
nearby_neuron	donor3_2.TAGCGTTGGGTCTTAC.1	4.13097e-05	2.36898e-09	3.64469e-09	7.85863e-09	2.64521e-09	0.929902	0.016709	0.0525206	0.000826893	6.33725e-09
nearby_neuron	donor3_2.TAGCTAGAAGGCATGA.1	6.08528e-10	5.46136e-10	7.92466e-10	0.00198841	4.09466e-10	0.853224	2.11229e-09	0.144787	7.92261e-10	6.1231e-10
nearby_neuron	donor3_2.TATCACCCAACCGACC.1	0.0010722	4.4445e-10	1.14561e-09	0.0115624	0.0304836	0.76903	6.21587e-09	0.182776	1.24367e-09	0.00507496
nearby_neuron	donor3_2.TATGGGTACGTATCGT.1	0.00216991	5.71572e-10	1.73688e-09	0.0218285	6.50008e-10	0.802404	0.0258308	0.147767	1.06696e-09	3.86472e-09
nearby_neuron	donor3_2.TCAACCATGTTCGGGC.1	5.13623e-09	0.0349583	6.57533e-09	6.73249e-08	0.0635036	0.702438	4.5978e-08	0.183401	7.14304e-09	0.0156983
nearby_neuron	donor3_2.TCACAGGTTATTGGGC.1	3.60177e-09	0.00345876	8.09287e-09	1.22955e-08	0.000280199	0.782818	0.0139199	0.199524	7.6014e-09	2.20573e-08
nearby_neuron	donor3_2.TCAGTACTGACCCGCG.1	6.81388e-09	3.73024e-09	1.13914e-08	0.0163544	2.67444e-09	0.863908	0.0599655	0.0597718	4.64109e-09	5.66707e-09
nearby_neuron	donor3_2.TCGCTAAACCGCTATC.1	0.00261922	5.42763e-08	1.15184e-07	0.0150314	3.6077e-08	0.77632	0.0176872	0.188342	7.20776e-08	1.18819e-07
nearby_neuron	donor3_2.TCGTCTTAGGCGTTAA.1	2.50335e-08	3.6655e-09	1.50864e-08	0.02296	9.10327e-09	0.831274	0.00488659	0.140879	6.63625e-09	2.27419e-07
nearby_neuron	donor3_2.TCGTTAGGAGTCCCTA.1	4.56998e-09	0.00303048	7.02114e-10	2.01937e-09	2.60761e-10	0.910503	0.000504786	0.0859621	6.99545e-10	8.21752e-10
nearby_neuron	donor3_2.TCTAGCATCTTCGATG.1	1.69281e-09	4.59939e-09	3.13726e-09	5.21745e-09	7.08601e-09	0.996465	4.35603e-09	0.00353507	3.03024e-09	3.3717e-09
nearby_neuron	donor3_2.TCTGATGTATTCTGTC.1	8.84399e-08	4.17558e-08	2.91081e-07	1.75223e-07	3.18557e-08	0.907831	0.0921671	1.35334e-06	6.17865e-08	1.27521e-07
nearby_neuron	donor3_2.TCTTACTTATGCCTCT.1	1.03308e-07	0.0357643	0.00550693	0.05269	6.07885e-08	0.657447	0.0270579	0.221533	1.06978e-07	4.73894e-07
nearby_neuron	donor3_2.TGCAGAGTACCGAGCA.1	3.71943e-08	1.43848e-07	6.23691e-08	6.11062e-07	5.39421e-08	0.873894	0.0172331	0.108872	3.36084e-08	2.07081e-07
nearby_neuron	donor3_2.TGTCCTAAGTCACCGC.1	2.99083e-07	5.44267e-09	7.76819e-09	0.000327338	5.29721e-09	0.92127	5.39508e-08	0.0784023	6.45669e-09	2.88282e-08
nearby_neuron	donor3_2.TTAACCAACCCTCCCT.1	9.32103e-09	0.0598536	7.35677e-09	6.40612e-09	0.0269853	0.885556	4.27903e-09	0.0226752	0.00492941	4.2933e-09
nearby_neuron	donor3_2.TTACCCATTGCCGGGT.1	0.0203828	0.0114363	5.81492e-09	3.12315e-09	1.72334e-08	0.8425	1.95903e-08	0.125681	5.81198e-09	5.70205e-09
nearby_neuron	donor3_2.TTAGCTAATACGATCT.1	2.22256e-07	0.0111533	0.00613547	0.0284369	3.21914e-07	0.826235	0.0105877	0.11745	1.91209e-07	5.7878e-08
nearby_neuron	donor3_2.TTATCCGGGATCTATA.1	2.70835e-07	1.06565e-06	0.00907441	0.0137595	7.16383e-08	0.948892	4.14899e-07	0.028272	1.40463e-07	1.75364e-07
nearby_neuron	donor3_2.TTCCAATCAGAGCTAG.1	5.91878e-09	4.65701e-09	1.77179e-08	1.62572e-08	6.98892e-09	0.855716	0.0385833	0.105701	1.1461e-08	8.67135e-09
nearby_neuron	donor3_2.TTCCGGTTACCCACTT.1	1.12732e-07	9.26856e-08	1.94041e-07	2.77425e-07	7.8704e-08	0.897576	0.0507104	0.0478577	8.03969e-08	0.00385498
nearby_neuron	donor3_2.TTCTGACCGGGCTCAA.1	1.31265e-09	4.53776e-10	1.31078e-09	0.0241069	1.46813e-09	0.9061	0.0144356	0.0553579	5.64718e-10	9.94404e-10
nearby_neuron	donor3_2.TTGATTATGCAGATGA.1	5.31822e-09	2.15247e-08	1.35582e-08	5.2805e-08	1.02445e-08	0.778244	0.0475468	0.174209	6.76008e-09	2.8468e-08
nearby_neuron	donor3_2.TTGTGTATGCCACCAA.1	8.16796e-07	2.96399e-08	5.95849e-08	0.00964896	1.06414e-07	0.932038	0.0090427	0.0492688	4.15502e-08	1.83438e-07
nearby_neuron	donor3_2.TTGTTAGCAAATTCGA.1	2.2453e-08	0.00442531	9.13444e-08	1.96613e-08	1.29928e-07	0.848617	0.0784818	0.0153814	0.0530943	2.70334e-08
nearby_neuron	donor3_3.AAAGTGTGATTTATCT.1	1.31504e-07	6.35949e-07	3.65628e-05	2.11251e-07	1.34912e-07	0.867786	0.0181344	0.102564	0.0114781	2.93076e-07
nearby_neuron	donor3_3.AAATACCTATAAGCAT.1	0.00106878	3.01626e-10	5.00874e-10	0.00782888	0.0163038	0.893497	0.0134263	0.0522266	2.55546e-10	0.0156484
nearby_neuron	donor3_3.AAGTAGAAGACCGGGT.1	1.5009e-10	0.000722704	0.0172762	0.00182739	1.51107e-10	0.773328	1.1106e-09	0.206846	2.73823e-10	2.15099e-10
nearby_neuron	donor3_3.AAGTGAGTCGGGTTTA.1	7.86244e-09	4.4318e-09	5.01706e-09	0.00864629	1.86785e-08	0.931463	0.00166381	0.0582271	6.86583e-09	7.64712e-09
nearby_neuron	donor3_3.AATCTGCGTTGGGACG.1	0.00197721	5.31394e-09	6.66312e-09	6.77748e-09	4.76104e-09	0.855455	2.11937e-08	0.142567	5.35494e-09	8.95834e-09
nearby_neuron	donor3_3.AATGTGCCCGAGGTGT.1	1.23077e-07	2.85599e-07	0.122909	0.153554	3.19438e-07	0.701801	2.38839e-07	0.0217346	6.67518e-07	3.44085e-07
nearby_neuron	donor3_3.AATTAGCGCTGCAGCG.1	8.29014e-09	3.40488e-08	6.18911e-08	0.00589433	0.0303707	0.807103	0.0194601	0.137172	5.50813e-08	2.58904e-08
nearby_neuron	donor3_3.ACAAATGGTAGTGTTT.1	2.7866e-09	9.23375e-09	5.79267e-09	0.0230756	2.81153e-08	0.742715	1.13562e-07	0.23421	5.36565e-09	9.82687e-08
nearby_neuron	donor3_3.ACAATGAATACGGAGA.1	1.79778e-08	9.02691e-09	3.31743e-08	4.96488e-07	9.07198e-09	0.936354	2.53838e-08	0.0636457	7.10854e-08	1.312e-07
nearby_neuron	donor3_3.ACACGAGACTCCTTCT.1	3.08229e-09	0.00355611	0.0635658	3.92458e-09	3.13021e-08	0.885688	0.0238804	0.0233097	1.52329e-08	4.80469e-08
nearby_neuron	donor3_3.ACACTGATCAAGGTGT.1	0.00999009	0.0502765	9.26698e-09	8.09798e-09	1.11245e-08	0.887849	1.78605e-08	0.049643	0.00224091	3.74799e-09
nearby_neuron	donor3_3.ACATAATAAGGCGGTG.1	0.015293	2.11959e-09	9.84253e-10	1.12351e-09	1.09432e-09	0.91896	0.0118189	0.0539283	5.08218e-10	4.97991e-09
nearby_neuron	donor3_3.ACCAACGCTTATTTAT.1	3.45444e-07	6.26593e-07	3.73601e-07	3.59954e-07	0.00505568	0.824549	0.0213406	0.149052	1.03564e-07	6.19503e-07
nearby_neuron	donor3_3.ACCAATATGCAAGTTA.1	5.47216e-09	5.64746e-09	6.16476e-09	0.00812751	3.51888e-09	0.900368	1.01431e-08	0.0915042	6.22079e-09	8.45019e-09
nearby_neuron	donor3_3.ACGTATTACTCCGATC.1	4.14443e-10	5.00094e-10	8.82464e-10	5.63901e-09	0.000344946	0.899345	9.97903e-10	0.10031	7.44135e-10	9.00379e-10
nearby_neuron	donor3_3.ACGTTAATGTCGAAGA.1	7.19307e-09	6.33977e-09	1.60356e-08	1.40573e-08	3.52931e-08	0.869377	5.58781e-08	0.122639	1.68364e-08	0.00798352
nearby_neuron	donor3_3.ACTGTAGCACTTTGGA.1	4.30774e-07	0.0300434	1.2666e-07	0.0117593	6.43563e-08	0.800531	0.00861982	0.149045	2.92337e-07	8.64316e-08
nearby_neuron	donor3_3.AGAACGTGGTACATTC.1	0.00370343	0.012585	1.3113e-07	0.00412737	7.50084e-08	0.896428	0.0129882	0.0701674	1.86282e-07	7.15343e-08
nearby_neuron	donor3_3.AGATCTCAGGTGTGAT.1	1.64919e-09	2.2725e-10	2.83521e-10	3.34339e-10	2.55902e-10	0.923009	1.42831e-09	0.0769911	2.03556e-10	7.18491e-10
nearby_neuron	donor3_3.AGCTGAAGTAAACCAA.1	1.49195e-09	1.72493e-09	1.68696e-09	1.57476e-08	4.20061e-09	0.86183	1.01492e-08	0.13817	1.17385e-09	2.75592e-09
nearby_neuron	donor3_3.AGGACAGTCGAATCCC.1	1.31001e-09	6.33369e-10	4.56411e-10	0.000209622	1.24478e-09	0.883727	2.41779e-09	0.116063	3.88131e-10	1.12019e-08
nearby_neuron	donor3_3.AGGGTCGATGCGAACT.1	2.39757e-10	1.98852e-10	2.61007e-10	0.000387738	2.2995e-10	0.942599	6.1067e-10	0.0570132	2.10828e-10	7.37108e-10
nearby_neuron	donor3_3.AGGGTGCTCTCGAGGG.1	3.32989e-10	2.05665e-10	0.000725984	0.00255638	8.02118e-11	0.81382	5.39874e-10	0.182898	1.5586e-10	2.77548e-10
nearby_neuron	donor3_3.AGGGTTCCCTTTGGTT.1	2.33379e-09	4.04741e-09	6.57559e-09	0.00732565	5.40914e-09	0.781624	0.0816921	0.129359	2.19964e-09	4.64144e-09
nearby_neuron	donor3_3.AGTCGGCCCAAACGAC.1	3.0715e-08	2.0033e-09	0.00970009	0.023807	0.0426147	0.850721	1.51394e-08	0.0731572	2.48822e-09	1.05558e-08
nearby_neuron	donor3_3.AGTGATATGAGTAGTT.1	9.6591e-09	2.37231e-08	2.10745e-08	3.34736e-08	2.88416e-08	0.868011	0.0409987	0.0909905	1.56931e-08	3.28572e-08
nearby_neuron	donor3_3.AGTGATTCAAGCAGGA.1	4.01576e-10	2.08603e-10	7.07278e-10	3.87244e-08	3.81484e-10	0.854524	1.65997e-09	0.130983	3.9436e-10	0.0144932
nearby_neuron	donor3_3.ATAGACAACGGGACCT.1	1.27415e-08	9.89149e-10	2.34738e-09	1.89361e-09	4.9289e-09	0.909664	0.0157825	0.0745537	9.81823e-10	3.24918e-09
nearby_neuron	donor3_3.ATAGAGTACTGGGACA.1	2.52706e-09	1.33002e-09	2.4743e-09	1.02412e-08	1.92469e-09	0.851556	0.0407525	0.107692	1.50107e-09	5.28111e-09
nearby_neuron	donor3_3.ATAGAGTTATCAACTT.1	2.51373e-10	2.26252e-10	5.47592e-10	2.8552e-10	5.33334e-10	0.876814	6.63114e-10	0.123186	4.43444e-10	6.3863e-10
nearby_neuron	donor3_3.ATCACGTGCTAATTAA.1	0.0073175	9.39202e-08	8.2169e-08	0.0338628	6.46303e-07	0.722514	0.0160844	0.220221	8.71391e-08	1.03657e-07
nearby_neuron	donor3_3.ATCGACCCAATACAGA.1	0.00229917	1.31647e-10	3.42161e-10	0.00350104	3.04073e-10	0.856773	0.0420565	0.0953699	1.75129e-10	1.23144e-09
nearby_neuron	donor3_3.ATCGACTCTTTCCGTT.1	2.87383e-08	2.34367e-08	3.58386e-08	1.14657e-08	6.64433e-07	0.908496	0.0301058	0.0603614	1.05747e-08	0.00103608
nearby_neuron	donor3_3.ATGACGCGTTCTATCC.1	8.80525e-10	1.95378e-09	1.9541e-09	0.00846164	1.3937e-09	0.866817	3.84855e-09	0.124721	1.66036e-09	2.00666e-09
nearby_neuron	donor3_3.ATGCCATTTGCGACCA.1	4.47795e-10	6.47049e-11	1.19664e-10	1.02274e-10	0.00113648	0.833748	2.92632e-10	0.165116	8.54818e-11	2.01446e-10
nearby_neuron	donor3_3.ATGTAGCGCGCGTAGG.1	1.14092e-08	1.24604e-09	6.73597e-10	0.00147828	0.00154395	0.89929	3.42062e-09	0.0889543	5.30221e-10	0.00873373
nearby_neuron	donor3_3.ATTAATACTACGCGGG.1	0.00279544	0.0137809	2.22657e-07	0.000602628	7.1325e-08	0.816041	0.0886685	0.0642355	1.50613e-07	0.0138754
nearby_neuron	donor3_3.ATTACTAGCCTCTTGC.1	0.00740745	1.79675e-08	0.016988	0.0251629	1.01367e-07	0.821356	0.0436813	0.0854045	3.48742e-08	1.53825e-07
nearby_neuron	donor3_3.ATTATACTTTGCTCGT.1	9.51969e-10	0.0125288	5.70732e-09	0.0156886	0.0429809	0.742087	0.0102147	0.152827	0.0236737	3.18229e-09
nearby_neuron	donor3_3.ATTTCCGGGTTCTGCG.1	3.58255e-09	9.91123e-08	5.69937e-09	0.034424	1.31521e-08	0.874851	0.0057414	0.0849836	4.17641e-09	1.01206e-08
nearby_neuron	donor3_3.CAAGGATCGCATGTTC.1	8.17957e-09	4.59729e-09	1.09522e-08	0.00127609	2.83162e-08	0.917907	4.22169e-08	0.0808163	7.19675e-09	1.56947e-07
nearby_neuron	donor3_3.CACATCTCACCGACGA.1	6.82341e-08	4.03675e-08	3.99421e-08	6.42217e-08	3.10328e-08	0.744326	7.25853e-08	0.255674	3.92867e-08	3.75763e-08
nearby_neuron	donor3_3.CACCCACACGTCACCC.1	0.00283983	0.0207542	9.3312e-10	0.0242812	2.66196e-05	0.863194	3.05243e-10	0.0861206	0.00278406	4.61768e-10
nearby_neuron	donor3_3.CACCGCCAGAAGGTTT.1	0.00437132	0.00295262	7.03068e-08	0.0074811	6.07793e-08	0.789792	6.45912e-07	0.195402	3.68975e-08	1.12708e-07
nearby_neuron	donor3_3.CACTCCTATGTAAGAT.1	5.47289e-10	5.38924e-10	9.99247e-10	2.14259e-09	5.64604e-10	0.933221	1.13572e-09	0.0547838	1.00582e-09	0.0119956
nearby_neuron	donor3_3.CAGCAGCCCGTTCCTT.1	1.51967e-09	2.59236e-10	1.1934e-09	5.74435e-10	0.00332563	0.870729	0.0192738	0.106671	8.62803e-10	9.52323e-10
nearby_neuron	donor3_3.CAGGCGCCATGCTAGG.1	5.07107e-10	0.0384038	1.37425e-09	3.3973e-10	9.43432e-10	0.806582	1.09259e-09	0.126245	0.0287699	6.9706e-10
nearby_neuron	donor3_3.CATGCCAACTCGCAAA.1	1.25491e-07	0.00684876	0.036315	0.0385402	7.44969e-08	0.856747	9.95312e-07	0.0615478	1.73857e-07	1.4487e-07
nearby_neuron	donor3_3.CCATCGCAGTTAAACT.1	2.19765e-07	0.00732206	1.61518e-07	6.2029e-08	8.18944e-07	0.895315	0.0195752	0.0684176	6.72541e-08	0.009369
nearby_neuron	donor3_3.CCCGTAAGTCTAGGCC.1	2.24544e-09	3.68361e-10	4.30645e-10	0.00886629	1.42028e-09	0.909791	3.38509e-09	0.0813432	3.4048e-10	4.12707e-10
nearby_neuron	donor3_3.CCCTCATTCTGGAATT.1	6.08333e-08	1.46687e-08	2.48728e-08	0.00281263	2.08535e-08	0.977735	8.96972e-08	0.0194523	2.05535e-08	4.35922e-08
nearby_neuron	donor3_3.CCGATCTCAACCTTAT.1	1.0902e-06	3.73374e-08	5.70779e-08	0.015767	3.25138e-08	0.808517	1.0617e-07	0.175715	4.67597e-08	1.17514e-07
nearby_neuron	donor3_3.CCGCGGAATGCGTCAC.1	2.05361e-09	0.00465637	7.22244e-10	3.18644e-09	0.0107962	0.910389	1.4953e-09	0.0298514	0.00961588	0.0346913
nearby_neuron	donor3_3.CCTGTACTCACGCCCA.1	2.90319e-09	4.94841e-08	0.0349543	0.00089776	8.69529e-09	0.838376	1.27184e-08	0.125772	1.04211e-08	8.47725e-09
nearby_neuron	donor3_3.CGAGGGACTGCGGTCG.1	0.00964202	9.60833e-10	2.38958e-09	0.0319825	7.88036e-09	0.645955	0.0336433	0.278777	3.93074e-10	1.05902e-09
nearby_neuron	donor3_3.CGCCTGGCCTACGTAA.1	1.1662e-09	0.0131782	8.45953e-09	0.0301232	4.57541e-10	0.857232	1.86082e-09	0.0994665	1.24069e-09	1.93472e-09
nearby_neuron	donor3_3.CGCTGTGTGGATGTTG.1	0.000468916	8.53864e-10	7.50622e-10	1.21453e-09	4.64454e-10	0.912576	0.0386443	0.0483104	4.03035e-09	3.68964e-09
nearby_neuron	donor3_3.CGGCCACGCACAAAGT.1	0.0122423	1.7705e-10	4.25106e-10	4.56058e-10	0.00291283	0.899073	0.0213699	0.0644017	2.54709e-10	9.279e-10
nearby_neuron	donor3_3.CGGGTGTACCCATTTA.1	0.00351958	0.0033786	1.97781e-07	2.02274e-07	7.67269e-08	0.84584	1.07137e-07	0.147261	8.98015e-08	9.27205e-08
nearby_neuron	donor3_3.CGGTGCAGATAGAACG.1	4.97465e-10	0.0121516	1.01374e-09	5.21196e-10	0.0125276	0.896183	2.49955e-09	0.0791376	5.30172e-10	8.45309e-10
nearby_neuron	donor3_3.CGGTTGACCTGGCATA.1	4.13836e-07	1.0352e-07	8.54022e-08	0.0117341	8.09418e-08	0.930696	2.99126e-06	0.057566	7.13325e-08	1.3376e-07
nearby_neuron	donor3_3.CGTGAAGTTAATTCAC.1	0.00175601	5.85522e-09	1.05625e-08	0.000361	4.56147e-09	0.95758	0.0132004	0.0271023	7.42688e-09	1.06285e-08
nearby_neuron	donor3_3.CGTTGAATACCGCGCT.1	1.25082e-08	1.56013e-08	2.06155e-08	7.72574e-05	5.86018e-09	0.870406	1.46686e-08	0.129517	9.24183e-09	3.68501e-08
nearby_neuron	donor3_3.CTACGCACGGAGTACC.1	0.0022153	2.7263e-09	7.13686e-09	7.10186e-09	1.43201e-08	0.855984	0.0307736	0.111027	1.96108e-09	3.42336e-09
nearby_neuron	donor3_3.CTACTGCCACCTGACC.1	0.00891092	4.64121e-10	5.81444e-10	0.00613521	0.0100648	0.8609	1.29774e-09	0.113989	9.28638e-10	1.10854e-09
nearby_neuron	donor3_3.CTATTCATGTGTCCCA.1	2.69699e-08	4.24456e-09	1.82433e-09	0.00238815	2.55809e-09	0.948614	0.00793813	0.0410595	2.13031e-09	3.19105e-09
nearby_neuron	donor3_3.CTCTATTTGGCTGCAG.1	1.43745e-09	2.01236e-09	6.11579e-10	0.0093554	1.62632e-09	0.89362	0.0762309	0.0207934	5.62375e-10	9.41515e-10
nearby_neuron	donor3_3.CTGCACTCCAGTACAG.1	0.011236	0.0108394	1.19909e-07	0.0173828	1.69961e-08	0.769033	1.01066e-07	0.1723	0.0192085	1.14563e-07
nearby_neuron	donor3_3.CTGGATTTACACTTGA.1	5.00597e-10	2.19886e-10	5.76357e-10	3.36152e-10	5.06889e-10	0.901975	0.0195392	0.0784863	2.98189e-10	4.69842e-10
nearby_neuron	donor3_3.CTGGGTAGGCAGTTAA.1	5.1049e-08	0.00629283	5.27431e-09	0.0141532	0.0196999	0.777504	0.00916982	0.17318	3.52196e-09	1.21195e-08
nearby_neuron	donor3_3.CTGGTAACACATAGAA.1	4.80249e-07	2.73469e-07	2.65613e-07	2.62919e-07	0.00813984	0.913107	0.00879696	0.0699544	1.94486e-07	7.50643e-07
nearby_neuron	donor3_3.CTGGTAACGAGCTCTT.1	1.61731e-08	1.67468e-09	3.5386e-09	0.000163369	2.47924e-08	0.823648	8.95364e-09	0.176188	2.75842e-09	3.21505e-08
nearby_neuron	donor3_3.CTTTAGGAACACTGTT.1	1.77269e-09	1.7131e-09	2.36096e-09	4.4996e-09	0.00392471	0.866484	1.13788e-08	0.129591	2.03735e-09	3.25991e-09
nearby_neuron	donor3_3.GAAAGAACAGCGTTAT.1	3.51799e-10	1.43243e-10	1.14959e-10	0.00138117	3.04768e-10	0.895056	3.42246e-10	0.103563	9.10981e-11	1.51526e-10
nearby_neuron	donor3_3.GAACTGTGGAGAGACA.1	1.52442e-09	2.4365e-10	2.46769e-10	2.70272e-08	2.54956e-10	0.972981	2.76827e-10	0.0270185	2.0885e-10	2.68381e-10
nearby_neuron	donor3_3.GAAGTGCTGGATAGCT.1	0.0070858	2.04286e-10	5.20954e-10	3.06784e-09	2.57469e-10	0.860949	8.41501e-10	0.131965	4.98424e-10	2.02219e-09
nearby_neuron	donor3_3.GAATCTGAACATTCTC.1	2.17075e-07	1.19823e-07	1.6382e-07	1.45935e-07	5.89367e-07	0.979408	9.37754e-07	0.0149211	2.60009e-07	0.00566874
nearby_neuron	donor3_3.GACCTTCCACGTCTAC.1	1.78661e-09	1.59531e-09	2.23747e-09	0.000132674	4.26159e-09	0.871276	0.0208058	0.107786	1.63074e-09	5.46123e-09
nearby_neuron	donor3_3.GACGGTCAATAGAAGC.1	2.08141e-09	0.0349698	8.64686e-09	0.000625573	2.15147e-09	0.78334	1.91815e-08	0.181065	4.91044e-09	4.15368e-09
nearby_neuron	donor3_3.GAGCGAGGGAGTACCG.1	3.02167e-10	2.09184e-10	5.65607e-10	3.67309e-10	3.50358e-10	0.946363	0.00673319	0.0469036	2.69524e-10	6.41291e-10
nearby_neuron	donor3_3.GATATGAGACACTAAC.1	0.000296934	3.80357e-08	1.12466e-07	0.0222705	5.65093e-08	0.824389	0.0197614	0.133282	2.52636e-07	1.447e-07
nearby_neuron	donor3_3.GCACTGCCTACCTTTA.1	1.09072e-08	4.09421e-09	1.86612e-08	2.73881e-08	1.7001e-08	0.944836	2.15884e-08	0.0551635	8.81982e-09	4.04514e-08
nearby_neuron	donor3_3.GCCCGTAATACCTTCT.1	0.000531251	7.81444e-10	1.88368e-09	0.00280471	2.96864e-09	0.905454	0.0220269	0.0691828	1.12047e-09	4.94079e-09
nearby_neuron	donor3_3.GCCCTGAGGATGGGCT.1	3.56987e-06	6.70052e-08	1.11475e-07	0.0102134	5.06683e-08	0.926724	1.40112e-07	0.0589339	1.50287e-07	0.00412454
nearby_neuron	donor3_3.GCCGAAATTCCTACGT.1	4.38618e-08	1.36203e-08	4.34005e-08	7.55879e-08	3.30849e-08	0.927991	0.0129701	0.0590388	2.26744e-08	1.11647e-07
nearby_neuron	donor3_3.GCCTTCAGCCCTACCG.1	3.48424e-09	5.74701e-09	5.93406e-09	0.0278839	1.93384e-09	0.85723	6.11164e-09	0.114886	3.63904e-09	2.17352e-08
nearby_neuron	donor3_3.GCGAAACTTAACTGGA.1	0.00376158	1.64165e-10	2.6963e-10	5.34334e-10	5.09047e-10	0.931487	1.42478e-09	0.0647512	1.47738e-10	6.49678e-10
nearby_neuron	donor3_3.GCGGTTCCCTATCATG.1	1.68485e-07	7.08948e-07	6.74543e-07	0.00870231	2.41193e-07	0.837985	0.0265423	0.126767	3.60491e-07	9.5652e-07
nearby_neuron	donor3_3.GCTAATACCGAATGCC.1	0.00712276	8.16962e-10	1.40987e-09	0.0110366	1.7963e-09	0.918473	1.25602e-08	0.0633681	8.67299e-10	6.40345e-09
nearby_neuron	donor3_3.GCTTCCGTCCCTAGAC.1	1.15632e-06	6.93108e-08	1.22173e-07	2.48847e-07	1.05535e-07	0.944568	0.00414319	0.0512863	1.11816e-07	2.65538e-07
nearby_neuron	donor3_3.GGAATGCGCTAGCGTG.1	0.000600974	6.15912e-09	1.32174e-08	8.67095e-09	0.00379447	0.895913	0.0383928	0.0612987	2.10437e-08	1.89529e-08
nearby_neuron	donor3_3.GGAGCGAGGCCTACTT.1	0.0030803	2.0948e-08	3.63894e-08	7.14959e-08	4.87923e-08	0.953377	1.25857e-07	0.043542	2.4915e-08	1.2734e-07
nearby_neuron	donor3_3.GGCGAAATCTAACTTG.1	2.05094e-09	1.22439e-09	3.1351e-09	2.88436e-09	2.34989e-09	0.913442	9.43822e-09	0.0865578	3.29066e-09	3.6251e-09
nearby_neuron	donor3_3.GGCGCTTCATTCCCTG.1	0.00249195	0.0175487	2.32414e-08	6.98602e-08	5.6744e-09	0.87538	4.86871e-08	0.0862112	7.74652e-08	0.018368
nearby_neuron	donor3_3.GGGATTTACCGCACCT.1	1.65078e-08	1.6338e-08	5.23872e-08	2.78675e-08	0.029085	0.816585	3.21872e-07	0.15433	1.68646e-08	2.71152e-08
nearby_neuron	donor3_3.GGGCGATATGTGTGAA.1	0.000633848	3.87797e-08	2.01696e-07	0.0146439	3.78436e-08	0.738077	6.71793e-07	0.246644	5.44274e-08	9.02482e-08
nearby_neuron	donor3_3.GGTCGGCCAGGAGCTT.1	5.43071e-07	1.76639e-07	7.20762e-07	9.07237e-07	3.67882e-07	0.827629	2.51946e-06	0.14782	3.38353e-07	0.0245453
nearby_neuron	donor3_3.GGTGAAGTACAGGGAT.1	4.56732e-10	3.08334e-10	5.85334e-10	0.00834485	1.35045e-09	0.854529	3.28205e-08	0.137126	3.01688e-10	1.57761e-09
nearby_neuron	donor3_3.GGTGTAAATCGATTGT.1	0.0145661	2.50861e-10	0.00508254	0.011881	7.60389e-10	0.954256	6.21493e-10	0.0142144	5.50062e-10	1.65571e-09
nearby_neuron	donor3_3.GGTTTCAATCGGTCAG.1	1.16667e-08	8.55333e-09	7.36156e-09	0.0191498	0.000248365	0.816348	4.66978e-08	0.164254	5.29879e-09	9.59546e-09
nearby_neuron	donor3_3.GTAAGTAACAGTCTGG.1	4.04894e-10	4.26162e-10	7.84751e-10	1.49916e-09	0.00112007	0.81557	0.0302406	0.132089	2.78197e-10	0.0209812
nearby_neuron	donor3_3.GTAGACACGCCTGACT.1	2.20875e-09	1.83194e-09	0.0398715	2.42506e-09	2.1824e-09	0.931046	1.03478e-08	0.0290823	5.72249e-09	9.24663e-09
nearby_neuron	donor3_3.GTAGCTTCCTCTTGTT.1	2.65604e-10	4.23313e-10	1.37436e-10	0.0214591	1.25029e-10	0.751109	2.97685e-10	0.227432	1.13722e-10	1.98279e-10
nearby_neuron	donor3_3.GTAGTCGCGGGAATCA.1	7.80124e-08	1.74611e-08	2.80291e-08	1.73782e-08	2.14021e-08	0.937224	5.97372e-08	0.0627762	2.99949e-08	2.7444e-08
nearby_neuron	donor3_3.GTGAGGACACTTAAGG.1	2.24779e-09	2.68375e-09	2.95863e-09	0.00476355	1.76121e-09	0.878616	1.93794e-08	0.11662	1.64253e-09	5.70063e-09
nearby_neuron	donor3_3.GTGCCATCACACGGTG.1	1.20507e-08	0.0698266	3.68738e-08	0.0107087	2.70136e-08	0.852823	8.43522e-08	0.0638849	0.00275698	3.47447e-08
nearby_neuron	donor3_3.GTTCTTCCCTCGATGT.1	1.02463e-08	1.56802e-08	7.85193e-08	1.17943e-08	9.7579e-09	0.91062	2.63552e-08	0.0893797	2.3222e-08	1.62266e-08
nearby_neuron	donor3_3.TAAACCCAGGAGGGCA.1	3.69577e-07	8.56769e-09	1.18475e-08	0.00902801	2.53139e-08	0.917806	1.60663e-08	0.0731658	9.78735e-09	2.57405e-08
nearby_neuron	donor3_3.TAAAGCGGTATTTCCA.1	9.01162e-09	7.01886e-09	1.05287e-08	0.0145349	1.83227e-08	0.855471	0.000440333	0.129554	1.09019e-08	1.1984e-08
nearby_neuron	donor3_3.TAATATTGAAATTCGC.1	2.38643e-08	3.08949e-08	4.81955e-08	0.0194706	3.855e-08	0.899324	0.0206205	0.0605841	4.5028e-08	1.39511e-07
nearby_neuron	donor3_3.TACGCCATATTCTAAT.1	8.19487e-09	1.42875e-09	2.37959e-09	1.06896e-08	2.29289e-09	0.772656	1.63897e-08	0.22078	5.94106e-09	0.00656396
nearby_neuron	donor3_3.TACTCTTTCGTCTTCA.1	1.70288e-06	6.13413e-08	9.84331e-08	0.00517292	2.73622e-07	0.948693	4.8851e-07	0.046131	7.61282e-08	6.16385e-07
nearby_neuron	donor3_3.TAGACGCCCGTACCGG.1	0.000658234	1.50572e-08	5.82068e-08	0.00515312	4.10008e-08	0.876427	8.35693e-08	0.117762	3.17841e-08	3.55766e-08
nearby_neuron	donor3_3.TAGCGTCCGGTGTGGT.1	6.00385e-10	0.0116374	5.22647e-10	6.39978e-10	8.36433e-10	0.920781	0.0206261	0.0423956	1.22457e-09	0.00455956
nearby_neuron	donor3_3.TATACACAGACGCCTT.1	0.00895758	2.25862e-09	7.48955e-09	0.00266864	1.44838e-09	0.844686	0.0407284	0.10296	1.51271e-09	1.5e-09
nearby_neuron	donor3_3.TATATCCCTGGGAGGA.1	3.37918e-08	2.93592e-08	6.4015e-08	4.65004e-08	9.65067e-08	0.865766	1.19034e-06	0.134232	4.11235e-08	5.76569e-08
nearby_neuron	donor3_3.TATCTACCACAGCGGG.1	0.000202578	2.61181e-09	7.51147e-09	1.12786e-08	4.16092e-09	0.896556	0.00582645	0.097415	3.55962e-09	7.25388e-09
nearby_neuron	donor3_3.TATGGGACCGAGCAGG.1	3.85823e-09	1.3914e-09	2.9546e-09	0.00237231	4.29619e-09	0.950053	0.0268965	0.0206784	1.3127e-09	5.55795e-09
nearby_neuron	donor3_3.TCAACCATGTTCGGGC.1	0.00733604	2.46392e-08	1.84045e-07	0.00984484	1.63956e-07	0.880377	0.0147584	0.0876832	5.71415e-08	1.31516e-07
nearby_neuron	donor3_3.TCACAGGGAATCGCAA.1	1.11157e-09	6.94571e-10	1.69317e-09	9.58583e-10	1.92609e-09	0.944841	8.34374e-09	0.0551592	1.24492e-09	2.06008e-09
nearby_neuron	donor3_3.TCCGGCCTAGCGTACA.1	1.30099e-08	1.55636e-08	4.8997e-08	7.22629e-08	0.0138565	0.891513	0.0167868	0.0778439	1.70395e-08	3.01154e-08
nearby_neuron	donor3_3.TCCTAAATTGGGAAGC.1	3.9955e-10	5.73225e-10	5.013e-10	6.73202e-10	0.010961	0.93536	0.0414189	0.0122598	3.41947e-10	8.06169e-08
nearby_neuron	donor3_3.TCCTTTCTTACGCTTA.1	0.00252502	1.42549e-09	2.12e-09	0.00227707	8.75691e-10	0.821782	4.65685e-09	0.173416	7.03789e-10	2.86295e-09
nearby_neuron	donor3_3.TCGCTGGGCGGATTGT.1	0.00345398	2.47644e-10	4.50127e-10	8.36777e-10	4.78765e-10	0.869042	0.0202929	0.107211	2.62809e-10	1.50137e-09
nearby_neuron	donor3_3.TCGGGCCGTCGTGGTA.1	8.26522e-07	2.02348e-07	6.61766e-07	1.89201e-06	0.0122211	0.815641	1.14555e-06	0.172132	3.24341e-07	6.25767e-07
nearby_neuron	donor3_3.TCGTGTCACGCTGACA.1	3.34139e-07	2.16283e-07	1.95377e-07	0.0584721	1.50991e-07	0.842004	2.08608e-07	0.0950406	1.31187e-07	0.00448211
nearby_neuron	donor3_3.TCTATCGGTCGCAACA.1	0.000220461	0.0227013	2.42479e-09	0.0297745	1.35668e-09	0.693145	0.000722513	0.253436	4.08055e-08	2.55124e-09
nearby_neuron	donor3_3.TCTCTAATAGCTGGTA.1	1.5504e-08	6.05669e-09	9.67966e-09	7.91699e-08	1.01292e-08	0.916774	1.70656e-06	0.0832245	5.55474e-09	6.51584e-08
nearby_neuron	donor3_3.TCTGGGAACCTTTGAA.1	0.000994303	0.0332042	2.33392e-07	0.00942954	1.94621e-07	0.793977	3.79691e-07	0.162392	4.29542e-07	1.81659e-06
nearby_neuron	donor3_3.TCTTACTTATGCCTCT.1	0.00331383	1.22516e-08	4.873e-08	1.74175e-07	2.20211e-08	0.929148	2.5333e-08	0.0675376	1.90947e-08	4.1881e-07
nearby_neuron	donor3_3.TGAGCTTTAATGACGC.1	0.00542115	3.76086e-08	4.49381e-08	0.00941866	3.31749e-08	0.841274	3.11098e-07	0.143886	3.99484e-08	9.7619e-08
nearby_neuron	donor3_3.TGATCAGGGAACTGCT.1	3.3946e-08	0.00288711	1.17237e-07	0.0182239	5.08667e-08	0.905925	7.74222e-08	0.0729634	4.24281e-08	5.6572e-08
nearby_neuron	donor3_3.TGCTCGGTGGGTCACC.1	0.0180381	0.0233934	2.02835e-08	2.58923e-08	1.01884e-08	0.883118	1.22055e-07	0.0536226	0.0207841	0.00104386
nearby_neuron	donor3_3.TGTACGAACAAATCCG.1	4.93212e-09	4.82259e-09	6.6254e-09	0.00691869	5.50745e-09	0.901922	2.91101e-08	0.0911595	3.85654e-09	6.11753e-08
nearby_neuron	donor3_3.TGTGGCAAAGCGTATG.1	1.18738e-08	5.30882e-09	8.90356e-09	1.32117e-08	1.31911e-07	0.812431	2.33032e-08	0.187569	4.74324e-09	1.05978e-08
nearby_neuron	donor3_3.TTACTAAAGGACTTTA.1	4.44113e-10	3.48478e-10	1.14059e-09	9.44201e-10	6.16151e-10	0.92316	2.4955e-09	0.0671201	0.00971967	1.08976e-09
nearby_neuron	donor3_3.TTATATTTGGCAATCC.1	4.80201e-07	0.00226354	1.6619e-07	0.034969	1.34004e-07	0.868681	0.0254491	0.0686362	8.26767e-08	3.21783e-07
nearby_neuron	donor3_3.TTATTAGGGAAGCATC.1	0.00823384	2.79595e-09	3.91143e-09	3.86234e-09	0.00412687	0.854592	5.94679e-08	0.133047	3.74279e-09	4.16861e-09
nearby_neuron	donor3_3.TTCATGGCGCAACAGG.1	1.00164e-07	4.11822e-08	7.43263e-08	2.01177e-07	0.0303908	0.744002	4.13021e-07	0.225606	4.74735e-08	7.68409e-08
nearby_neuron	donor3_3.TTCTGCGGGTTAGCGG.1	0.00179598	5.56566e-10	8.1738e-09	0.000689399	7.98186e-10	0.85074	4.7005e-09	0.146774	2.36275e-09	7.49229e-10
nearby_neuron	donor3_3.TTGATTAGCTGTTTCT.1	5.78983e-10	8.7387e-10	8.94799e-10	0.00479865	2.15613e-05	0.899869	0.0117713	0.0835396	1.223e-09	8.19894e-10
nearby_neuron	donor3_3.TTGCGGCATCAGAAAG.1	4.20678e-10	3.309e-10	4.55071e-10	0.00448391	5.4515e-10	0.909195	0.0102561	0.0760653	3.36319e-10	7.12789e-09
nearby_neuron	donor3_3.TTGGCCTAGAATTTCG.1	7.08752e-08	1.51893e-08	4.46073e-08	1.10851e-07	2.0248e-08	0.965664	7.34926e-08	0.0343354	2.39813e-08	5.80185e-07
nearby_neuron	donor3_3.TTGTAAGGCCAGTTGG.1	8.61245e-09	4.52501e-09	6.72027e-09	1.10212e-08	2.46311e-08	0.938395	5.41922e-07	0.0616039	3.80421e-09	3.04362e-08
nearby_neuron	donor1_1.AAATTAACGGGTAGCT.1	2.4242e-08	0.0016201	6.73207e-08	0.021332	0.017669	0.845099	0.0163287	0.0944914	0.00345943	3.52394e-08
nearby_neuron	donor1_1.AACCGAGCTTGGTCAT.1	0.00236922	1.96276e-07	3.68819e-07	4.92542e-07	1.91034e-07	0.969763	1.90155e-05	0.0278468	2.80304e-07	6.68232e-07
nearby_neuron	donor1_1.AATCAGGTTTCATTTA.1	1.21783e-07	3.20002e-08	6.93813e-08	5.89221e-08	4.25686e-08	0.922463	2.1755e-06	0.0775339	4.03308e-08	1.97545e-07
nearby_neuron	donor1_1.ACCCGATTGGTTCCGA.1	1.74608e-07	4.06695e-08	2.9099e-08	0.0194392	5.79149e-08	0.951732	0.0056016	5.51516e-08	1.9939e-08	0.0232266
nearby_neuron	donor1_1.ACGACTGGTCATACTC.1	8.89651e-10	8.06084e-09	2.42587e-09	1.17464e-09	9.19582e-10	0.818666	0.0210356	0.131902	1.48835e-09	0.0283961
nearby_neuron	donor1_1.AGCCCTAAGCGAAGTT.1	0.00647433	6.0923e-08	1.76079e-07	0.0221169	1.13875e-07	0.79548	4.31697e-07	0.159767	1.67246e-07	0.0161601
nearby_neuron	donor1_1.AGCGAGACGTGAAGGC.1	1.55498e-07	2.29299e-08	5.97059e-08	0.00532417	9.39043e-09	0.697046	2.35298e-07	0.297629	2.28171e-08	2.8407e-07
nearby_neuron	donor1_1.AGGGTGCCGTTCTTTA.1	7.48508e-10	0.0232742	0.0359228	0.0196328	2.97631e-10	0.628033	5.86174e-10	0.271861	0.00967382	0.0116022
nearby_neuron	donor1_1.AGTTCTGCGTTGTATC.1	0.00739235	3.87881e-10	3.12513e-10	0.00361146	2.23764e-10	0.988996	2.77747e-10	3.95157e-10	2.14499e-10	3.17773e-09
nearby_neuron	donor1_1.AGTTGACGGTCCTTGC.1	2.28396e-08	3.15258e-08	2.97678e-07	0.0300531	5.67169e-08	0.813352	5.18737e-08	0.156595	3.31606e-08	3.02488e-08
nearby_neuron	donor1_1.ATTGTCTGTTTCATGT.1	5.99046e-09	4.20608e-09	0.0105938	5.31599e-09	3.92544e-09	0.850903	0.0399493	0.0985536	5.17368e-09	4.15021e-09
nearby_neuron	donor1_1.CAGAGCATGAGCTTGC.1	3.25144e-08	5.08732e-09	0.0428191	1.72182e-08	5.90937e-09	0.821586	1.49753e-08	0.120148	7.72691e-08	0.0154465
nearby_neuron	donor1_1.CCAACCTTATGTAACT.1	2.30798e-08	1.42164e-08	1.16752e-08	0.0235804	2.51548e-08	0.956555	1.32211e-07	0.0198638	1.06027e-08	3.29744e-08
nearby_neuron	donor1_1.CCACACTGAGATATTA.1	3.76613e-09	3.18706e-09	1.87884e-08	0.0119085	1.88743e-08	0.869512	0.118574	4.89548e-06	1.51124e-08	1.22012e-07
nearby_neuron	donor1_1.CCATGTTCATCTATAT.1	4.58996e-08	2.78059e-08	4.58592e-08	0.0133626	0.00368205	0.963965	7.77961e-08	0.01899	5.42728e-08	1.20808e-07
nearby_neuron	donor1_1.CCCTGATGTAACTCGT.1	2.00768e-09	8.78795e-10	1.883e-09	1.6158e-09	2.06581e-09	1	2.05426e-09	7.59888e-09	1.18791e-09	9.38481e-09
nearby_neuron	donor1_1.CGCACGTCTGTTTATG.1	0.0106639	4.23429e-09	0.034746	1.92995e-08	1.02856e-08	0.803441	2.14353e-08	0.143642	5.09024e-09	0.00750748
nearby_neuron	donor1_1.CGGCCACGCACAAAGT.1	3.07502e-08	6.78394e-08	0.00993223	0.0332103	0.00443547	0.84104	2.01399e-07	0.110766	5.87819e-08	0.000615654
nearby_neuron	donor1_1.CTACATATCGCGGGAC.1	0.010999	0.00598981	0.0129258	0.0056829	0.0205194	0.916651	2.74149e-09	0.0253035	0.00192817	2.37079e-09
nearby_neuron	donor1_1.CTCATGGCTCACAATC.1	7.49817e-09	1.91786e-09	1.9095e-08	2.71373e-09	4.46495e-09	0.968594	9.78322e-09	0.0314062	1.30111e-07	4.70396e-09
nearby_neuron	donor1_1.CTCCCTCCTTTCGATC.1	9.92116e-11	6.49463e-11	1.40343e-10	1.35592e-10	8.70339e-11	0.802947	4.46785e-10	0.197053	8.48599e-11	1.68083e-10
nearby_neuron	donor1_1.CTTCGTAGATAGGTGA.1	0.001753	1.9739e-07	5.8949e-07	3.55016e-06	1.50241e-07	0.898855	0.0563874	0.042998	5.02769e-07	1.30381e-06
nearby_neuron	donor1_1.GATTCCCTTGTCGCAG.1	4.86532e-09	1.21686e-09	3.93994e-09	0.00074947	1.64341e-09	0.996506	6.27215e-09	4.36531e-09	1.59593e-09	0.002745
nearby_neuron	donor1_1.GCACAAACCCTAGATG.1	3.00258e-08	0.00345419	2.46455e-08	0.00628656	0.0074593	0.70927	4.03826e-08	0.232037	0.00812349	0.0333695
nearby_neuron	donor1_1.GCACAAGTGTCGGAAG.1	4.34303e-08	2.53242e-08	3.51166e-08	0.000184978	2.25543e-08	0.968393	4.72245e-08	0.0314215	3.53181e-08	6.96568e-08
nearby_neuron	donor1_1.GGTGTAGGTAAGTAAA.1	4.36574e-10	5.85387e-10	8.33724e-10	0.00408982	8.23123e-10	0.971812	1.09944e-09	0.024098	3.98515e-10	2.18136e-09
nearby_neuron	donor1_1.GTGCAACAAATGTGGC.1	2.27275e-10	2.14919e-10	5.02855e-10	3.2859e-10	3.16154e-10	1	5.94331e-10	1.15234e-09	3.69435e-10	7.16e-10
nearby_neuron	donor1_1.TAACAGCGTTTGTGCT.1	9.99633e-08	0.000912396	7.24442e-07	2.3756e-07	8.53549e-07	0.888595	0.0412747	0.0398296	1.02025e-06	0.0293854
nearby_neuron	donor1_1.TACCAGGAATCCCGTC.1	5.3137e-07	1.73995e-10	4.81291e-10	1.11602e-09	4.13689e-10	0.979108	0.0179992	2.24471e-09	4.37913e-10	0.00289262
nearby_neuron	donor1_1.TCATATGAGCTTTGTT.1	0.00740781	5.09619e-09	6.65509e-09	5.90372e-09	4.29665e-09	0.992592	2.69392e-08	3.02844e-08	3.35587e-09	1.31737e-08
nearby_neuron	donor1_1.TCGGAGAGTATCGGGA.1	0.00402705	0.0203969	0.0320107	0.0415635	6.7114e-08	0.753859	0.0239942	0.124148	1.02601e-07	7.73814e-08
nearby_neuron	donor1_1.TCGTTCGTTATTATGT.1	8.1425e-11	4.9504e-11	1.01693e-10	0.00896989	2.27717e-10	0.986004	2.667e-10	0.00499646	4.7061e-11	2.97322e-05
nearby_neuron	donor1_1.TGCCGGATGTACGAGC.1	5.35147e-09	3.50219e-09	7.50625e-09	6.05627e-09	4.68696e-09	0.966501	0.00190246	0.0315969	4.30478e-09	1.1215e-08
nearby_neuron	donor1_1.TTGCCTAATCCAAAGT.1	1.22445e-07	3.79883e-08	1.15959e-07	7.86581e-08	2.66714e-08	0.989434	0.0105655	1.52408e-07	6.6081e-08	2.06499e-07
nearby_neuron	donor1_1.TTGTTTCACATCCAGG.1	2.093e-08	5.98349e-09	1.02774e-07	0.0695764	1.49682e-08	0.801079	0.0333486	0.0959963	1.42414e-08	2.48098e-08
nearby_neuron	donor1_2.AAACACCAATAACTGC.1	3.95814e-10	4.61551e-10	5.08985e-10	7.44244e-10	1.38001e-09	0.975282	0.0141965	0.0105219	3.24367e-10	8.16018e-10
nearby_neuron	donor1_2.AAAGGCCCTATAATAC.1	0.00202788	3.61318e-08	2.79904e-08	0.000981492	1.34846e-07	0.850785	5.14279e-08	0.146205	1.81752e-08	2.6729e-08
nearby_neuron	donor1_2.AAAGGGATGTAGCAAG.1	4.72601e-09	4.68658e-09	9.73571e-09	2.70512e-08	7.24393e-09	1	5.41406e-09	1.51258e-08	1.33813e-08	1.47939e-08
nearby_neuron	donor1_2.AACAGCTGTGTGGCAA.1	4.50904e-09	1.86931e-09	0.00507245	1.47305e-08	1.28609e-09	0.942572	1.11813e-08	0.0437078	2.97006e-09	0.0086475
nearby_neuron	donor1_2.AAGCGTCCCTCATCGA.1	1.98673e-06	1.96245e-08	3.47122e-08	3.72971e-08	1.12862e-06	0.999996	2.99172e-07	1.02143e-07	2.25973e-08	4.68219e-08
nearby_neuron	donor1_2.ACACAAAGACGGGTGG.1	3.96298e-10	3.01243e-10	1.00709e-09	0.069558	8.90097e-11	0.796634	0.0246182	0.106479	1.98007e-10	0.00271026
nearby_neuron	donor1_2.ACCGAAGAGTCTGGTT.1	3.89531e-08	1.09741e-08	2.70112e-08	1.98783e-08	3.78686e-08	0.840825	3.00239e-08	0.159175	1.43277e-08	5.78296e-08
nearby_neuron	donor1_2.AGCGAGACGTGAAGGC.1	0.00644702	1.85711e-08	9.56023e-08	2.7624e-08	3.29601e-08	0.863359	0.05137	0.078824	3.98309e-08	1.55472e-07
nearby_neuron	donor1_2.AGTCGGCCCAAACGAC.1	1.27455e-08	0.00519492	1.93992e-08	0.00449624	5.87267e-09	0.98562	4.94908e-07	0.00468863	1.21648e-08	1.40283e-08
nearby_neuron	donor1_2.ATCGACTCTTTCCGTT.1	3.45866e-09	9.87813e-09	7.75188e-09	3.53546e-09	3.4324e-09	0.992036	0.00796402	7.50574e-09	2.77594e-09	2.00142e-08
nearby_neuron	donor1_2.ATGAGGAGTGTTAATC.1	2.3052e-08	1.63456e-07	6.06766e-08	0.00563624	2.33826e-08	0.975056	6.54582e-08	0.00792795	2.03598e-07	0.0113791
nearby_neuron	donor1_2.ATGCATGATCCAGGAT.1	8.48987e-08	1.70683e-08	3.3622e-08	1.67306e-08	1.47748e-08	0.98355	0.0164494	2.29027e-07	1.82788e-08	4.33722e-08
nearby_neuron	donor1_2.CAGCAGCCCGTTCCTT.1	3.18714e-09	6.18436e-10	1.36119e-09	0.0118889	0.0188992	0.897985	0.0219793	0.0492473	1.08908e-09	8.89135e-10
nearby_neuron	donor1_2.CATACTATGTAATTGT.1	0.00176668	1.76674e-09	3.42611e-09	0.0197377	2.95042e-09	0.969741	2.55066e-09	1.70178e-08	3.81676e-09	0.00875489
nearby_neuron	donor1_2.CATCCAATATAGTTTG.1	0.00288061	2.62889e-07	2.27966e-07	1.23409e-07	0.00961931	0.846387	0.0547438	0.0863657	9.5029e-08	2.34826e-06
nearby_neuron	donor1_2.CCCTAGTGTCAGGTGT.1	2.6521e-08	6.50246e-09	1.25863e-08	0.00321887	4.92227e-09	0.996781	1.17099e-08	3.03034e-08	9.81327e-09	1.24878e-08
nearby_neuron	donor1_2.CCGGGTTCGAGGTTAC.1	0.0259669	8.39707e-09	1.70264e-08	0.00829061	1.39718e-07	0.738877	4.59407e-08	0.226865	3.41918e-08	1.66862e-08
nearby_neuron	donor1_2.CGCTACGGGACATTTA.1	7.24704e-08	1.78026e-07	1.97889e-07	0.0139546	0.00488644	0.910568	0.0104896	0.0601007	1.68695e-07	2.85021e-07
nearby_neuron	donor1_2.CGTGTCTCGTTACGAC.1	7.79448e-09	3.15872e-08	1.38301e-08	5.23899e-08	9.02351e-09	1	2.61419e-08	9.36563e-08	2.03858e-07	1.58596e-08
nearby_neuron	donor1_2.CTCGTTTCTAATGTTT.1	0.0214411	0.0365053	0.0407356	1.69064e-08	0.0143828	0.756071	0.0287617	0.097186	0.00491614	7.33869e-08
nearby_neuron	donor1_2.CTTTGGCTTTAGTAAA.1	0.000901256	6.62776e-11	1.66855e-10	0.0458244	7.40224e-11	0.895434	4.36343e-10	0.0578404	1.01266e-10	3.43302e-10
nearby_neuron	donor1_2.GAAACATAGGAAACAG.1	1.93687e-09	2.2742e-09	7.75759e-09	5.71961e-09	3.88737e-09	1	5.1816e-09	8.31489e-09	3.24488e-09	2.18639e-07
nearby_neuron	donor1_2.GACTAAGATCATGCAC.1	8.39844e-10	2.65137e-10	3.43719e-10	3.53747e-10	1.88062e-10	1	2.39592e-08	5.51865e-09	3.59851e-10	8.89746e-10
nearby_neuron	donor1_2.GATGACAAGTAGGGCA.1	0.00322168	1.01572e-10	2.81852e-10	9.16434e-10	1.44987e-09	0.996137	8.65998e-10	1.58836e-09	1.63167e-10	0.000641235
nearby_neuron	donor1_2.GCTCTAAACCCTGACG.1	5.18177e-08	0.0859468	2.11922e-07	0.00161791	3.83965e-08	0.87442	3.90849e-07	0.0263739	0.00749357	0.00414703
nearby_neuron	donor1_2.GCTGAATCTTCCAATC.1	9.33365e-10	2.44969e-10	0.0282408	3.2895e-10	0.0237442	0.673738	4.64423e-09	0.270605	3.94487e-10	0.00367123
nearby_neuron	donor1_2.GGCTCCTCCACCTGTT.1	1.10537e-08	9.6995e-09	1.62028e-08	7.5775e-09	5.3254e-09	1	1.02785e-07	2.36863e-08	1.07474e-08	4.82595e-08
nearby_neuron	donor1_2.GTATCTCAGTCTTGAC.1	4.81946e-08	3.05541e-08	4.36898e-08	3.1714e-08	4.09083e-08	0.920235	0.00475355	0.065824	3.48771e-08	0.0091875
nearby_neuron	donor1_2.TACTGCAATCAATTAC.1	0.00200157	0.0339938	1.12335e-05	4.14876e-08	4.20556e-08	0.809872	5.51243e-08	0.0857813	0.0683397	3.07893e-08
nearby_neuron	donor1_2.TAGGGTGTTTCAAGAG.1	0.00273615	4.49073e-07	4.25149e-07	0.00671507	2.63058e-07	0.973567	0.0169561	2.28846e-05	6.44211e-07	8.01819e-07
nearby_neuron	donor1_2.TATGGTCTGAGTAACA.1	2.73598e-10	1.46574e-10	3.90165e-10	0.0218456	2.55541e-10	0.8968	1.60455e-08	0.0813545	1.8984e-10	4.40022e-10
nearby_neuron	donor1_2.TCAGTACTGACCCGCG.1	3.5104e-10	2.02953e-10	7.94912e-10	2.35245e-09	3.32191e-10	1	2.1551e-09	2.24165e-09	3.08419e-10	1.88771e-09
nearby_neuron	donor1_2.TCAGTGTATACGTCAT.1	8.70683e-08	9.94321e-08	2.51861e-07	1.19144e-07	2.91186e-07	0.999998	2.2753e-07	2.31543e-07	2.29324e-07	2.23874e-07
nearby_neuron	donor1_2.TGAGTAAATTAGCGTA.1	0.00967792	0.0218499	0.0491905	0.00108031	0.037536	0.622261	0.0271091	0.202642	0.0115675	0.0170857
nearby_neuron	donor1_2.TGATTTATTAGCTGTG.1	0.00579487	1.71574e-07	3.71723e-07	0.00309936	1.56722e-07	0.984994	3.06946e-06	4.88922e-07	2.56514e-07	0.00610696
nearby_neuron	donor1_2.TGTATAACAGATCCTG.1	2.62127e-08	7.48891e-09	2.4411e-08	2.63198e-08	1.21224e-08	0.928179	0.0299192	0.0419013	1.31072e-08	3.23152e-08
nearby_neuron	donor1_2.TGTGTCGCGAGTTGCA.1	0.00821601	8.41705e-09	4.43108e-07	7.79207e-08	0.0144752	0.977308	2.66913e-08	2.67481e-08	5.27096e-08	2.38876e-08
nearby_neuron	donor1_2.TTACCGCCTTAGGGAA.1	2.65643e-07	1.70683e-08	8.13867e-08	4.92721e-08	7.90278e-08	0.99631	0.00368872	1.12274e-06	5.97929e-08	5.19492e-08
nearby_neuron	donor1_2.TTATGACAAACTGGAT.1	0.00656193	2.91504e-07	6.74695e-07	0.108994	4.01203e-07	0.743064	0.0435112	0.0978666	4.56149e-07	7.98953e-07
nearby_neuron	donor1_2.TTGCCCTGATCACGGG.1	3.38709e-08	0.0646267	1.06887e-07	0.119927	1.49558e-08	0.577103	5.39341e-08	0.238343	8.02053e-08	2.21965e-08
nearby_neuron	donor1_2.TTGCCTAATCCAAAGT.1	0.00255841	0.00777118	5.15876e-09	0.0125962	1.88998e-08	0.82791	0.052828	0.0917692	3.89672e-09	0.00456693
nearby_neuron	donor2_1_1.ACGCGGGCCAAGGACA.1	6.03541e-09	1.50688e-08	1.20992e-08	0.0385456	0.0261443	0.890057	2.91353e-08	0.0452526	2.51656e-08	2.40273e-08
nearby_neuron	donor2_1_1.GAAGCGTGAGGAATTT.1	0.00286364	9.96706e-07	6.16248e-07	0.00748295	0.00284607	0.943129	1.57291e-05	0.0436593	3.87046e-07	1.09695e-06
nearby_neuron	donor2_1_1.GGGACTGCATAGATAG.1	1.03897e-09	0.000414291	1.59946e-09	0.015132	0.0177467	0.966707	1.65843e-09	2.19082e-09	7.11048e-10	1.32564e-09
nearby_neuron	donor2_1_1.GTATCAAACGTTAGCT.1	1.14074e-10	1.42175e-10	2.07418e-10	8.90722e-11	1.56997e-10	1	2.5223e-09	4.87291e-10	1.20781e-10	9.69615e-11
nearby_neuron	donor2_1_1.GTGATCACTAACGCCT.1	4.7431e-08	1.18469e-08	2.25052e-08	8.97088e-09	0.000455594	0.985381	0.00705136	0.00711183	1.04722e-08	2.2592e-08
nearby_neuron	donor2_1_1.TCAGCAAATGCATCTC.1	2.16117e-07	2.85454e-07	2.24286e-07	1.52681e-06	0.00461173	0.993153	1.48796e-06	1.00404e-06	1.7651e-07	0.00223007
nearby_neuron	donor2_1_1.TCTGAACTCGTACCCG.1	1.42052e-09	5.90072e-05	5.13534e-10	2.37377e-09	0.00115182	0.998789	1.06118e-09	1.13148e-09	4.02355e-10	1.84469e-09
nearby_neuron	donor2_1_1.TGCTCCACAGTTCTTA.1	0.000702123	5.35245e-07	8.19325e-07	4.78705e-07	7.32053e-07	0.963865	0.0200789	0.00601019	0.00328068	0.00606034
nearby_neuron	donor2_1_2.AACAGCTGTGTGGCAA.1	0.00296361	3.91727e-08	2.89718e-08	0.00465178	5.64727e-08	0.961233	0.00384204	0.0243832	5.52823e-08	0.00292611
nearby_neuron	donor2_1_2.CTCAAACCACTGCCCG.1	2.02535e-08	5.38449e-09	8.82014e-09	0.000583084	3.99495e-09	0.999417	2.98744e-07	1.19099e-08	8.00353e-09	1.05205e-08
nearby_neuron	donor2_1_2.GTACAGAGGCAAGGGT.1	1.54641e-09	2.71435e-10	3.27503e-10	7.80801e-05	0.00329486	0.975342	4.9205e-10	0.021285	4.13382e-10	3.17578e-10
nearby_neuron	donor2_1_2.GTAGTTCGAAGGCGAA.1	7.26419e-09	2.58241e-08	0.000237614	0.0357042	4.20138e-09	0.854564	2.39694e-08	0.101478	0.00801607	3.59713e-08
nearby_neuron	donor2_1_2.TAACAGCGTTTGTGCT.1	2.75266e-10	5.61944e-10	5.03454e-10	0.00774717	4.60254e-10	0.944	0.0178353	0.030418	5.26167e-10	5.46272e-10
nearby_neuron	donor2_1_2.TACTCCTCTAGTTGAC.1	1.52394e-08	0.00127332	2.36392e-08	0.0105483	3.49427e-08	0.972304	2.81691e-08	0.00784468	3.87165e-08	0.00802906
nearby_neuron	donor2_1_2.TCGAATATCCCGCAGG.1	0.00254356	1.22648e-07	2.38314e-07	4.22451e-07	0.000232476	0.968518	0.00955448	0.0191502	1.63247e-07	2.07243e-07
nearby_neuron	donor2_1_2.TCTATCATGCAGTTAC.1	0.00403707	1.41244e-09	2.11056e-09	1.66679e-09	1.98043e-09	0.995963	3.80023e-09	1.78069e-09	1.30001e-09	1.46852e-09
nearby_neuron	donor2_2_1.AAGTCTTCTGTGGCCT.1	0.00766014	0.0151303	8.65073e-10	0.0220987	7.00293e-10	0.895982	1.80468e-09	0.0393464	0.019782	2.15397e-09
nearby_neuron	donor2_2_1.AATCTCTACTGTGGTT.1	8.31106e-10	3.89852e-10	4.20039e-10	0.0058108	6.05514e-10	0.968517	1.06915e-09	0.0256725	3.21504e-10	9.6376e-10
nearby_neuron	donor2_2_1.ACAAGCTATATGGAAG.1	2.85157e-10	1.66456e-10	2.66392e-10	8.26396e-10	2.93788e-10	0.989035	0.0109646	2.63922e-09	2.30624e-10	4.37396e-10
nearby_neuron	donor2_2_1.ACTATTTCCGGGCCCA.1	2.08942e-07	9.44966e-07	4.30995e-07	1.87848e-07	0.000634347	0.948575	0.0129398	0.037814	3.26195e-07	3.49778e-05
nearby_neuron	donor2_2_1.ATGAAGCCAAGGAGCC.1	0.00459807	2.77232e-07	0.0615829	1.23248e-06	4.83692e-07	0.933814	1.0722e-06	1.12385e-06	3.57706e-07	4.65334e-07
nearby_neuron	donor2_2_1.CAAGTCGTTGAAATCT.1	4.86736e-08	1.67744e-07	1.71819e-07	2.87978e-07	7.67234e-08	0.999998	1.19768e-07	7.47262e-07	2.63655e-07	2.12902e-07
nearby_neuron	donor2_2_1.CCTCCTGAGCCCACAT.1	1.9293e-08	4.09712e-08	3.46449e-08	4.04328e-08	0.00686236	0.993137	5.91913e-08	6.1561e-08	2.29642e-08	1.20199e-07
nearby_neuron	donor2_2_1.CGCTCGACATAATGAT.1	8.89942e-09	0.00321193	1.18221e-08	4.41012e-08	0.000678858	0.994129	1.15272e-08	0.00198048	9.10228e-09	7.31418e-09
nearby_neuron	donor2_2_1.GAATGGGCTTATCGAC.1	6.3041e-11	6.79044e-11	7.41099e-11	0.0122239	2.90521e-10	0.92376	1.61846e-10	0.0640159	6.068e-11	2.03953e-10
nearby_neuron	donor2_2_1.GATTAGAAACAAGCGT.1	2.41305e-10	5.78607e-10	1.38637e-10	1.17553e-10	1.65826e-10	0.995849	0.00185332	0.0022977	1.09738e-10	1.82747e-10
nearby_neuron	donor2_2_1.GCTAAGTAAAGGCGAT.1	0.0081441	6.31315e-09	3.28781e-09	4.13022e-09	1.7513e-08	0.957839	7.88664e-09	0.022707	3.97544e-09	0.0113101
nearby_neuron	donor2_2_1.GCTCATTGATCATATC.1	2.13092e-07	2.09743e-08	3.84159e-08	5.61289e-08	5.20447e-08	0.853497	0.00277179	0.139364	0.00436664	3.34433e-08
nearby_neuron	donor2_2_1.GCTGCGAAGAATTATT.1	1.7895e-09	6.9895e-10	1.99046e-09	1.9454e-09	1.22887e-09	0.905203	0.0621841	0.0323791	0.000233922	1.31198e-09
nearby_neuron	donor2_2_1.GGTTCGGATTATACTA.1	3.68345e-10	0.00620654	6.26244e-10	2.27713e-09	2.91239e-09	0.98266	1.03856e-09	0.0111339	4.50573e-10	4.299e-10
nearby_neuron	donor2_2_1.TACCTATCCCTAGAGG.1	1.10047e-08	1.08217e-08	1.00953e-08	4.158e-08	7.20484e-09	0.97329	4.2642e-08	0.0267097	9.26246e-09	2.70147e-08
nearby_neuron	donor2_2_1.TCACGGTCATCGCACA.1	0.00857488	0.00322637	1.0913e-09	2.87633e-10	1.75908e-10	0.986479	8.23109e-10	0.0017194	7.59465e-10	1.39679e-09
nearby_neuron	donor2_2_1.TCTAGCATCTTCGATG.1	8.09747e-10	1.17722e-09	4.76505e-09	3.60591e-09	3.76365e-10	0.992451	0.00754946	1.84302e-09	5.69312e-10	6.0531e-10
nearby_neuron	donor2_2_1.TGAACTGCTATGACTT.1	0.0022547	2.42772e-06	1.88069e-08	0.00377768	9.30749e-09	0.964118	1.87572e-08	0.0298462	4.14514e-07	4.36575e-08
nearby_neuron	donor2_2_1.TGAGACGTACCTCTCA.1	1.54363e-08	4.58432e-09	1.65257e-08	0.000495156	9.16841e-09	0.959487	0.00786978	0.0321481	6.02966e-09	1.57735e-08
nearby_neuron	donor2_2_1.TGGTGCCCTGCCTTAC.1	1.06055e-09	6.26026e-10	6.66889e-10	0.000284998	0.0151168	0.984598	1.92944e-09	1.47024e-07	1.17133e-09	1.99771e-08
nearby_neuron	donor2_2_1.TGTCCGCAAACAATTC.1	1.19476e-08	0.00812869	1.4281e-08	1.75273e-07	1.38642e-08	0.970499	0.0136926	0.00767901	2.79101e-07	9.35477e-08
nearby_neuron	donor2_2_1.TTAAAGGCGATGCTCG.1	1.26434e-08	1.59657e-08	7.39386e-08	0.013941	1.2459e-07	0.766482	0.0173649	0.202212	2.05901e-08	2.44249e-08
nearby_neuron	donor2_2_1.TTGTTAGCAAATTCGA.1	3.05199e-09	7.63193e-09	3.36909e-09	0.000588527	2.53195e-09	0.995142	1.24198e-08	0.00426937	3.62057e-09	5.45521e-09
nearby_neuron	donor2_2_2.AACTACCCGTTTGTCA.1	3.87628e-10	2.71772e-10	2.19759e-10	0.00424152	1.30957e-10	0.971579	4.62822e-10	0.0241792	1.42051e-10	2.23255e-10
nearby_neuron	donor2_2_2.AGGCCCTAGAACGCCA.1	6.23101e-09	4.86644e-09	6.24117e-09	0.0025616	0.00491005	0.946897	0.00615826	0.0368753	2.66792e-09	0.00259728
nearby_neuron	donor2_2_2.AGGTGTTGCCGACCAC.1	8.56432e-10	7.26875e-10	6.9012e-10	2.00122e-09	5.94157e-10	0.984489	3.22417e-09	0.0155108	6.47295e-10	6.91012e-10
nearby_neuron	donor2_2_2.CAAACTCGCGACGCCG.1	2.08408e-08	6.74795e-09	4.2906e-09	5.78564e-09	2.64376e-09	0.986882	8.50657e-09	0.0131177	3.20544e-09	3.65162e-09
nearby_neuron	donor2_2_2.CAAATCTCTCACAAGG.1	0.000116617	2.83638e-10	2.50347e-10	2.7962e-09	0.00141964	0.931753	5.78322e-09	0.0621899	2.09686e-10	0.00452125
nearby_neuron	donor2_2_2.CAGCCGGGCCCTCTAT.1	6.42847e-08	0.000841599	8.19886e-09	1.435e-08	4.75998e-09	0.949696	0.0170196	0.0324424	1.43835e-08	4.26711e-07
nearby_neuron	donor2_2_2.CCAATAGTGCCGTCGA.1	0.00115555	1.28541e-07	0.00169767	1.78314e-08	1.27233e-08	0.943263	1.65298e-08	0.0538834	1.99925e-08	5.3638e-08
nearby_neuron	donor2_2_2.CTGAGAGTAGAAATAC.1	8.8306e-09	8.33291e-09	9.0725e-09	0.00836255	1.06155e-08	0.964464	1.25531e-08	0.0271735	1.11845e-08	3.08461e-08
nearby_neuron	donor2_2_2.CTGTTCATCTCACGGG.1	0.0118712	3.9493e-08	1.3535e-07	0.0297028	0.00510544	0.883566	1.36519e-08	0.0693191	0.000434969	9.18842e-09
nearby_neuron	donor2_2_2.CTTGCAACCGCCTCCT.1	5.19726e-08	4.52201e-07	6.87734e-07	6.13688e-08	8.08832e-08	0.935498	1.21584e-07	0.0644998	1.42823e-07	4.37033e-07
nearby_neuron	donor2_2_2.GCACAAACGAGGCGTG.1	1.70362e-09	2.087e-09	1.9296e-09	2.22266e-09	1.26031e-09	1	2.03801e-09	3.21847e-09	1.31844e-09	2.27303e-09
nearby_neuron	donor2_2_2.TACCCTCGGTAACCCT.1	3.0623e-08	4.8646e-08	5.00854e-08	0.050291	0.01665	0.932245	9.63918e-08	0.000813339	4.34687e-08	1.00934e-07
nearby_neuron	donor2_2_2.TACGTGCACTATGCTG.1	5.46959e-09	0.0123559	0.0243897	0.0402377	0.00704153	0.825391	7.74352e-08	0.0719221	0.0154353	0.00322687
nearby_neuron	donor2_2_2.TCCTCTGGCCCATTAG.1	3.32753e-10	1.841e-10	5.23713e-10	0.00702504	5.1407e-10	0.953598	7.62649e-10	0.0317677	3.02087e-10	0.00760925
nearby_neuron	donor2_2_2.TCTGAACCGGTCGGCT.1	0.00387406	4.19616e-08	4.08443e-08	0.00307222	8.47936e-08	0.989881	0.0023028	1.04647e-06	3.68931e-08	0.000868918
nodule	donor14_1.AAATTACCTATCGATG.1	8.62811e-08	2.01151e-07	4.72672e-07	0.019748	1.28343e-07	0.900914	0.0209157	0.0501104	7.25175e-07	0.00831026
nodule	donor14_1.AAGGTGATAAACCAGC.1	0.0177333	0.0298792	0.0180965	0.10672	0.0906114	0.719981	1.96585e-08	0.0138478	1.33827e-08	0.00313044
nodule	donor14_1.ACAATTTGAGCAGTGG.1	4.69964e-08	3.31008e-09	1.11177e-08	0.00514919	0.0234293	0.90728	0.0317608	0.026522	4.37576e-09	0.00585854
nodule	donor14_1.ATTCAGGACCTATTTC.1	0.0106429	0.0306865	0.0532863	2.22672e-09	0.0160184	0.711276	0.0702779	0.080925	0.0268866	1.6389e-09
nodule	donor14_1.CGAGTTCTGTCCCACC.1	0.00231622	0.0206527	0.00570302	1.08746e-06	1.37324e-07	0.794868	0.101838	0.0258575	2.00984e-07	0.0487638
nodule	donor14_1.CTCGATATTTGCGAGC.1	1.61577e-10	0.0105437	0.0151641	4.19206e-10	0.00895449	0.889749	0.0525353	0.0230533	5.06962e-10	3.50982e-10
nodule	donor14_1.GACACAAGGGAAGAAA.1	2.64185e-08	3.32986e-08	1.6906e-07	1.97159e-08	0.0325133	0.790459	0.158509	1.30461e-07	1.48135e-07	0.0185175
nodule	donor14_1.GAGATCTGTCACTCCG.1	7.27142e-09	0.00201565	1.17669e-08	0.0122531	9.45057e-09	0.955631	6.42496e-08	0.0301003	9.50384e-09	1.7026e-08
nodule	donor14_1.GCCAATAGGGCATCTC.1	0.00280694	2.7178e-07	2.16912e-07	0.00818153	0.00868998	0.839928	0.0941685	5.13866e-07	1.47316e-07	0.0462235
nodule	donor14_1.TATGGGTACGTATCGT.1	5.93301e-09	6.79079e-10	3.50234e-09	3.22337e-10	5.55789e-10	0.917808	0.0821924	7.26705e-09	9.62101e-10	5.88784e-10
nodule	donor14_1.TCCGTTTAGCCTTGAA.1	0.00711785	4.90693e-08	1.08018e-08	6.63544e-09	0.00519047	0.879929	0.0665624	0.0375972	0.00360326	1.87583e-08
nodule	donor14_2.AACGGACGTACGTATA.1	8.22678e-09	2.84071e-09	0.0871046	0.0435228	0.0362089	0.749301	0.000609663	0.0721997	2.54988e-09	0.0110534
nodule	donor14_2.AGTCTTCTCCTCAAAT.1	3.07225e-09	4.70774e-08	0.146644	0.061814	2.66394e-09	0.650433	0.0340645	0.0836752	0.0233694	2.56653e-09
nodule	donor14_2.ATAGTTCCACCCACTC.1	3.11263e-09	3.6749e-09	6.92471e-09	0.00221189	1.17874e-08	0.913789	0.0765444	0.00745484	1.9903e-09	3.4621e-09
nodule	donor14_2.CATACTTAGGCAATAC.1	1.57488e-08	1.32346e-08	0.000879321	2.0862e-08	0.0438844	0.907842	0.0233857	3.32381e-07	1.67608e-08	0.0240083
nodule	donor14_2.CGGGAATATAGTATAC.1	1.53277e-08	0.0268223	0.011867	0.0134196	0.00938436	0.627321	1.3873e-07	0.0726072	0.238578	5.89387e-07
nodule	donor14_2.CGGGCCTTCTTTGTAA.1	1.62462e-08	7.01016e-08	1.38397e-08	2.21221e-08	0.0180054	0.77377	0.119495	0.0887295	1.94962e-08	3.81507e-08
nodule	donor14_2.GCAACAGCAGTATGCG.1	0.00923802	0.0204464	0.039885	0.0181937	1.27124e-08	0.702539	0.0422256	0.153032	1.02992e-08	0.0144406
nodule	donor14_2.TCACCCTCTTAAGATT.1	0.0183109	0.0128854	1.10224e-08	3.75518e-09	2.20082e-09	0.923982	0.00378196	0.0410399	4.21576e-09	6.48174e-09
nodule	donor14_2.TCCGATGACTGAGCTC.1	7.51841e-09	0.0128922	1.35949e-08	0.0513561	0.00200183	0.84591	0.00607994	0.0783255	0.00343437	7.60532e-09
nodule	donor14_2.TGCTAAGTGTCTATTT.1	0.00181464	2.18779e-07	0.0889029	6.48288e-07	1.76092e-07	0.849477	0.0598024	1.00249e-06	3.41361e-07	4.64138e-07
nodule	donor14_2.TTATATACGCTGTCAC.1	1.47908e-07	2.33268e-07	0.0656209	0.0445042	0.00586171	0.705307	0.0649766	0.0738514	0.0348389	0.0050386
nodule	donor6_1.AAACATTTCCCGGATT.1	3.16117e-08	0.0298335	1.62758e-06	0.0162631	2.00953e-08	0.575219	0.118837	0.196515	0.0266759	0.0366544
nodule	donor6_1.AAAGTGTGATTTATCT.1	0.00109218	0.238759	0.145613	0.0305444	0.0451693	0.465826	0.0150849	0.0579111	5.72131e-07	8.20786e-08
nodule	donor6_1.AACCCGACAACCCGTG.1	2.4394e-07	5.45357e-07	0.144339	2.08479e-07	1.52112e-07	0.803913	0.0517448	9.53444e-07	1.80319e-07	2.88256e-07
nodule	donor6_1.AACGGACGTACGTATA.1	0.0062416	4.20104e-09	3.25608e-08	0.0393137	0.041553	0.848732	0.0641595	6.0279e-09	5.51937e-09	1.43941e-07
nodule	donor6_1.AAGCATACTCTCCTGA.1	1.87251e-07	0.00190816	1.16176e-05	7.40145e-08	0.00779945	0.914051	0.069255	0.00249311	8.06897e-08	0.00448174
nodule	donor6_1.AAGCGTCCCTCATCGA.1	3.93832e-08	0.331169	2.79803e-07	2.24659e-08	0.00841808	0.521407	0.0279824	0.0128163	0.0841885	0.0140183
nodule	donor6_1.AATCTGGCTTTCTAGT.1	9.58572e-09	0.00698817	0.00268288	0.126697	1.01827e-08	0.527754	0.180338	0.15554	8.94131e-09	7.4782e-09
nodule	donor6_1.ACAAGGATGCTTTAGG.1	8.38384e-10	6.47961e-10	3.40415e-09	2.78519e-09	3.30955e-09	0.876816	0.0382666	0.0849172	5.08757e-10	9.93611e-10
nodule	donor6_1.ACAATAGTCGTACGTT.1	2.06172e-08	9.96857e-09	8.3641e-09	1.56239e-09	1.17904e-08	0.825045	0.107895	9.61237e-08	1.67395e-08	0.0670595
nodule	donor6_1.ACAGCGACATTCTCAT.1	1.65154e-08	2.193e-08	2.43211e-08	0.0472621	6.21223e-08	0.86951	0.0306057	0.0526218	6.34815e-08	3.30853e-07
nodule	donor6_1.ACGATGCATATGTTAT.1	1.44346e-08	2.11252e-08	3.05433e-08	2.19893e-08	0.00120401	0.964771	5.88369e-08	0.0340246	1.68474e-08	3.66381e-08
nodule	donor6_1.ACGCATTCGTGAGTAC.1	0.00069823	1.11713e-08	0.030431	5.51924e-09	9.13722e-09	0.560124	0.127009	0.277043	8.15917e-09	0.00469348
nodule	donor6_1.ACGTTAGATTTGCCCG.1	3.08714e-09	1.14973e-08	2.99332e-09	6.24839e-09	2.63007e-09	0.865536	4.07752e-09	0.134464	1.9992e-09	4.49788e-09
nodule	donor6_1.ACTTCCATGCGGGACA.1	3.15952e-09	1.4133e-09	3.54208e-09	2.24236e-09	0.000706792	0.905261	1.73094e-08	0.094032	1.61699e-09	4.14147e-09
nodule	donor6_1.AGACCGGGAAACCCTG.1	0.00779897	1.84339e-07	3.9217e-07	1.53402e-07	0.0370606	0.702529	0.0707557	0.171696	1.00542e-06	0.0101583
nodule	donor6_1.AGATTCACAACCGATA.1	5.37509e-09	4.12477e-09	9.35619e-09	8.41757e-09	0.0330568	0.871729	0.0467571	0.0484569	4.83585e-09	2.58303e-08
nodule	donor6_1.AGCAACCGAAAGTAAT.1	5.35887e-10	0.095867	0.0500309	1.89181e-09	3.68457e-09	0.622283	1.54475e-09	0.23182	1.06451e-09	8.97127e-10
nodule	donor6_1.AGCACTTAAGGACGCC.1	1.22924e-07	1.32637e-07	0.09652	7.54493e-08	0.00263269	0.733334	0.0554383	0.112074	4.92126e-07	1.58732e-07
nodule	donor6_1.AGCGGGTCTGACACTC.1	1.65976e-08	0.077763	2.86902e-08	0.0608569	2.35596e-07	0.656315	0.0774703	0.116582	1.8945e-08	0.0110134
nodule	donor6_1.AGGCCACCCGTTATGA.1	4.00967e-10	7.9437e-11	1.22954e-10	3.15302e-10	8.3104e-11	0.926747	1.47742e-10	0.0674467	1.14882e-10	0.00580647
nodule	donor6_1.AGGCCTGAGAATCTCG.1	0.00401499	1.50216e-06	1.57893e-05	2.88521e-07	0.0304854	0.918071	0.0474069	2.45967e-06	6.78544e-07	6.98187e-07
nodule	donor6_1.AGGCTATGGTTAGCTT.1	4.60199e-09	3.6606e-09	1.48898e-08	0.0051676	5.62826e-09	0.767327	0.0139043	0.213601	4.46048e-09	8.19212e-09
nodule	donor6_1.AGTACTCTTATGCCCA.1	1.01362e-08	0.049015	0.0383393	6.08464e-08	0.0260959	0.571591	0.312272	0.00266759	1.72463e-08	1.92298e-05
nodule	donor6_1.AGTATAATACTAGGCA.1	3.05989e-07	1.5659e-06	2.27973e-06	3.2408e-07	6.19602e-07	0.906056	0.034314	0.0596178	6.14554e-06	5.16836e-07
nodule	donor6_1.AGTATACACAGCGACA.1	2.5199e-08	0.00327197	5.3842e-07	0.0536281	1.08135e-07	0.79819	0.124976	0.0187565	0.00117698	6.43956e-08
nodule	donor6_1.AGTCACTAGCTCTCGA.1	4.88274e-07	7.54325e-05	0.00157075	0.0546725	9.89551e-07	0.679734	0.213595	0.0503486	6.89594e-07	9.70974e-07
nodule	donor6_1.AGTCCATTGGCTGATG.1	2.7682e-08	0.00267618	1.04347e-06	0.0676262	0.0232784	0.852107	0.0523512	0.00195968	2.73536e-08	4.96939e-07
nodule	donor6_1.AGTGGCGTCTGAAGGT.1	0.00321006	1.23105e-08	6.19661e-09	0.0407429	4.97387e-09	0.687048	0.0535775	0.215194	2.03326e-09	0.000227911
nodule	donor6_1.AGTTTGGCACGGGTTG.1	0.0148002	2.02666e-07	0.129338	0.134256	0.0496898	0.366453	0.123245	0.104623	0.00109908	0.0764963
nodule	donor6_1.AGTTTGGCCAGACCTA.1	2.44238e-08	0.144084	6.79285e-08	1.04103e-08	0.0281878	0.540604	0.0531535	0.0643079	0.169663	3.72863e-08
nodule	donor6_1.ATAAGGTGGAGAACAT.1	1.19185e-07	5.33408e-08	1.10958e-06	0.0610306	1.2358e-06	0.71887	0.119856	0.100241	4.6195e-08	1.8614e-07
nodule	donor6_1.ATACTGCCTTACACCG.1	0.0299315	0.00748245	0.144662	0.0615779	0.0393844	0.547944	0.0911568	0.0778607	2.30538e-08	4.11755e-08
nodule	donor6_1.ATAGCAACTAGGGAAG.1	9.2779e-08	0.434689	5.13368e-07	2.29216e-07	1.80428e-07	0.427186	2.48419e-07	0.0339878	0.0558857	0.0482503
nodule	donor6_1.ATCAGCTCGTCCACTA.1	0.0196072	0.138244	0.013597	9.76033e-08	1.40121e-07	0.735992	0.0524395	5.76496e-06	0.0373628	0.00275184
nodule	donor6_1.ATCTGGGCTGTTCTTG.1	0.0152503	6.74756e-08	1.50478e-07	0.0659386	0.0648667	0.544943	2.81469e-07	0.309	6.02068e-08	2.94736e-07
nodule	donor6_1.ATGCCATTTGCGACCA.1	5.97015e-09	0.143697	0.13708	0.125628	4.01627e-09	0.400901	0.0180459	0.148794	3.06212e-08	0.0258548
nodule	donor6_1.ATGCGAGTCCCACCAC.1	1.54402e-07	1.93634e-07	0.279437	0.123295	0.140822	0.422323	1.7323e-07	0.0311472	0.002975	2.44349e-07
nodule	donor6_1.ATTACTAGCCTCTTGC.1	1.12311e-09	0.0861218	2.54696e-08	1.5903e-09	2.12809e-09	0.837395	2.2264e-09	0.0733062	0.0031766	2.28898e-09
nodule	donor6_1.ATTCCTCCGCCAGTGC.1	4.67126e-10	2.09318e-10	3.42706e-10	0.00750102	2.75074e-10	0.877142	5.16388e-10	0.115357	1.98727e-10	3.44283e-10
nodule	donor6_1.CAAAGATTATTGGGCC.1	1.87228e-08	4.41906e-09	0.0772662	0.00749071	0.132277	0.451392	4.37748e-08	0.326907	0.00466754	1.03243e-08
nodule	donor6_1.CAAATCTCTCACAAGG.1	0.00854782	4.7678e-09	7.55576e-08	5.88992e-08	7.59906e-09	0.636788	0.180871	0.173793	3.18023e-09	1.51699e-08
nodule	donor6_1.CAACCTACCGAGCAGT.1	9.8695e-10	0.22778	8.52655e-09	1.03218e-09	2.1091e-09	0.472543	2.39989e-09	0.0384756	0.261202	1.74888e-09
nodule	donor6_1.CAATGCGAGAAGTATC.1	0.000333886	9.82827e-09	0.0438481	0.0438389	1.58113e-08	0.515612	0.236399	0.118724	6.01978e-09	0.0412433
nodule	donor6_1.CACACACGCTAACGAG.1	5.24022e-08	1.36644e-06	0.0253278	0.0751181	1.34533e-07	0.613352	0.110564	0.162772	0.00719423	0.00567108
nodule	donor6_1.CACAGCACCCACGGCA.1	2.22574e-08	1.09388e-08	2.14919e-08	6.41009e-08	6.61152e-09	1	1.01955e-08	1.53109e-08	9.29706e-09	1.67575e-08
nodule	donor6_1.CACCCTTGGTGAGACC.1	3.34559e-09	0.0472641	2.22803e-07	5.72453e-09	1.86616e-08	0.469423	0.298031	0.185282	5.26761e-09	1.77883e-08
nodule	donor6_1.CACCTTGGCGCCTTTG.1	0.00683276	0.000494106	0.0851955	0.0811055	2.83926e-08	0.792996	6.09204e-08	0.0333758	5.6729e-08	4.55117e-08
nodule	donor6_1.CACGAAAGTTAGTCCC.1	0.0026324	0.0291211	5.94859e-09	0.00331081	2.26918e-09	0.752937	7.13262e-09	0.177113	2.38321e-09	0.0348864
nodule	donor6_1.CACTCTCAAGCATCGA.1	4.33343e-08	4.6884e-08	0.0891213	1.91309e-08	1.05564e-08	0.744763	1.52827e-07	0.166113	1.92218e-06	3.573e-08
nodule	donor6_1.CACTGTCCAAGTGAGA.1	2.23785e-08	1.60468e-08	1.87033e-08	0.0163007	3.5439e-08	0.739358	0.0192015	0.22514	1.52141e-08	2.1875e-08
nodule	donor6_1.CAGTTCGAGGACCCGA.1	4.97197e-09	0.0369391	4.89354e-08	5.3899e-09	0.0103594	0.639826	0.0544472	0.250647	0.0077816	8.20835e-09
nodule	donor6_1.CATAACGGACAGTCGT.1	9.37013e-09	2.58719e-08	0.00685245	0.0533689	8.34051e-09	0.824494	4.44129e-07	0.115283	1.42946e-08	4.02048e-07
nodule	donor6_1.CATCCTCTCAAAGATC.1	0.00802458	6.16447e-08	2.05623e-07	0.0486933	1.24825e-07	0.830233	0.0843542	0.0286938	1.01652e-07	4.90512e-07
nodule	donor6_1.CCAGAAAGCAACTCAT.1	1.25406e-10	2.47979e-10	3.55905e-10	5.07448e-10	1.91808e-10	0.958378	0.0137635	0.027858	2.71789e-10	1.09316e-09
nodule	donor6_1.CCATTAGCGATAATCC.1	8.23843e-09	9.874e-09	0.0316414	3.04916e-08	0.0290187	0.703437	0.00403227	0.23187	6.72404e-09	7.2339e-08
nodule	donor6_1.CCATTCCCTGCCCACA.1	5.10105e-08	2.99023e-08	0.042303	1.97361e-08	2.69446e-07	0.891315	0.0624452	0.00393648	3.71793e-08	5.02243e-08
nodule	donor6_1.CCCGCCATGCTCCCGT.1	4.48853e-09	3.33029e-09	4.71898e-09	0.00319916	5.09819e-09	0.849482	9.95431e-09	0.147319	3.80241e-09	5.26883e-09
nodule	donor6_1.CCGCACGTGACCTCGG.1	4.49002e-10	5.9896e-10	9.26848e-10	1.81577e-09	4.95441e-10	0.528066	1.30588e-09	0.471934	5.42602e-10	1.116e-09
nodule	donor6_1.CCGGCGTGAGACTCTG.1	1.47678e-07	2.85836e-07	3.00454e-07	9.40474e-08	1.45643e-07	0.915843	0.00282603	0.0813294	1.60166e-07	2.03822e-07
nodule	donor6_1.CCTTCTCAGCGTTCCT.1	4.37469e-09	0.0131414	4.73091e-09	1.76506e-09	8.22103e-10	0.808425	0.0688498	0.109584	2.91569e-08	6.51915e-09
nodule	donor6_1.CGCTTCCACTGAAATC.1	0.00297823	1.32865e-08	1.00458e-08	1.87919e-09	1.84768e-09	0.82564	1.16162e-09	0.170489	0.000892615	3.453e-09
nodule	donor6_1.CGGAGTTTGAGAGACA.1	6.94375e-10	1.54955e-09	2.38503e-09	9.83508e-10	1.32608e-09	0.652141	4.03512e-09	0.338715	0.00914389	1.92933e-09
nodule	donor6_1.CGGTGCAGATAGAACG.1	7.19983e-08	0.00178036	7.07748e-08	0.0844399	1.96266e-08	0.311921	3.84474e-08	0.601858	1.27718e-08	2.25274e-08
nodule	donor6_1.CGTCACGTCCATTGGT.1	0.0220722	0.0232634	0.0659277	0.0234899	0.0559402	0.502676	0.30566	2.2352e-07	0.000969789	1.2527e-08
nodule	donor6_1.CTAAAGAATGCCTACT.1	2.38169e-08	7.99408e-08	1.61555e-08	3.90991e-08	1.52075e-08	0.883492	1.47374e-08	0.116508	1.601e-08	1.81378e-08
nodule	donor6_1.CTAACGAAACTTGCTG.1	0.0216444	0.0252416	0.130655	0.036065	0.04564	0.550191	0.0369139	0.140468	1.70156e-08	0.0131811
nodule	donor6_1.CTAACTGATAATCGCC.1	0.000332143	3.17224e-08	4.2505e-08	0.0274373	0.0311091	0.671729	0.175956	0.0934367	1.25141e-08	9.19123e-08
nodule	donor6_1.CTACTCAAGGTATAGT.1	1.08482e-07	4.72846e-08	6.4217e-07	2.71284e-08	6.89015e-08	0.76885	0.112463	0.118685	1.13225e-06	5.43807e-08
nodule	donor6_1.CTATGGGAAGCGGAAT.1	6.83104e-08	1.79467e-08	2.41669e-08	0.0287154	0.0120311	0.919584	0.0142257	0.0254436	7.03721e-09	2.03049e-08
nodule	donor6_1.CTCCTCCAGCTCACAC.1	1.16668e-09	7.3852e-10	1.70012e-09	0.0159963	0.0531077	0.744546	0.108492	0.0405528	1.04156e-09	0.0373054
nodule	donor6_1.CTCTTCTATTGACTGG.1	0.0171605	2.91744e-08	0.0916473	0.046102	0.0363785	0.600478	0.0496713	0.151751	2.72658e-07	0.00681067
nodule	donor6_1.CTCTTGTCCCGCTTGG.1	1.06183e-07	0.0203248	3.15645e-07	0.0293297	1.05234e-07	0.793676	0.078019	0.0786494	3.74252e-07	4.66244e-07
nodule	donor6_1.CTGTATGGTGTAGAAA.1	3.55831e-09	4.11689e-09	6.06308e-09	2.59037e-09	2.62232e-09	0.882727	5.55074e-09	0.117273	3.11834e-09	4.92521e-09
nodule	donor6_1.CTTGAGTTAGGGTAAT.1	0.00919337	0.00942884	3.73173e-07	0.124297	8.28157e-08	0.609654	0.136983	0.110444	3.50126e-08	8.88231e-08
nodule	donor6_1.GAAACCGAATTACCTT.1	0.000157524	1.85538e-09	0.0114158	4.77724e-10	0.00455582	0.859637	0.072339	0.0518953	8.93973e-10	2.26488e-09
nodule	donor6_1.GAAATATCACCATCAG.1	8.23033e-10	0.0083078	2.9128e-09	1.24375e-09	1.10019e-08	0.828921	6.34525e-08	0.143786	1.96065e-09	0.0189852
nodule	donor6_1.GAACAGATTACTAAAT.1	8.26885e-10	5.33168e-10	0.0176187	0.0756299	6.53691e-10	0.607476	0.145843	0.153433	1.16857e-09	4.07348e-09
nodule	donor6_1.GAACCTTTAACGATCC.1	1.84769e-09	9.52011e-10	0.00791951	0.0214864	1.59187e-09	0.833175	0.0530621	0.0843569	1.9045e-09	1.76452e-09
nodule	donor6_1.GAAGCGTGAGGAATTT.1	2.40323e-08	1.82734e-08	3.90774e-08	9.65518e-09	1.5605e-08	0.972065	3.28875e-07	0.027934	1.98608e-08	2.8825e-08
nodule	donor6_1.GAAGCTTGCTGACCGC.1	5.08896e-10	4.51549e-10	6.635e-10	3.88758e-10	5.33241e-10	0.934693	1.15556e-09	0.0653071	3.73185e-10	8.51324e-10
nodule	donor6_1.GACCGACTGAAGCGTC.1	7.96849e-08	1.74288e-07	1.31734e-06	0.0186702	0.00681147	0.707334	0.0044363	0.26003	0.00271699	2.23653e-07
nodule	donor6_1.GACGACGATCCGCGTT.1	0.00741686	1.38635e-10	3.39304e-10	0.0738178	4.47001e-09	0.721292	0.120384	0.0770892	1.6983e-10	3.43833e-10
nodule	donor6_1.GACGAGGCTAATAAAC.1	1.56333e-07	3.22807e-06	9.68748e-08	0.0588407	0.0197297	0.796472	2.71822e-06	0.109049	1.06659e-07	0.0159025
nodule	donor6_1.GACGATATCACTGGGT.1	3.28068e-08	0.0102693	1.0103e-07	4.18172e-08	0.0403754	0.778953	9.40469e-07	0.170401	5.74089e-08	7.97592e-08
nodule	donor6_1.GACTAGGCCGTTAGGT.1	0.00080482	4.24556e-09	5.80009e-09	1.66135e-08	5.15872e-09	0.945929	0.0267924	5.61231e-08	3.69248e-09	0.0264734
nodule	donor6_1.GAGATGGGAGTCGACA.1	6.9027e-08	5.33398e-08	0.00959368	0.0494982	9.76279e-08	0.739401	0.0878344	0.113671	6.47716e-08	2.14946e-06
nodule	donor6_1.GAGCACCTGTGTCCAG.1	4.00291e-09	0.011518	0.0756623	0.0384131	0.00887257	0.694083	0.0371593	0.134292	4.83841e-09	1.23876e-08
nodule	donor6_1.GAGCGGAATGCGGTGT.1	7.69787e-05	2.41248e-09	0.00117907	0.0129174	0.0758442	0.727787	0.0304719	0.132714	0.01901	1.02465e-08
nodule	donor6_1.GAGGAATGGAGAGGTT.1	7.15689e-09	1.21305e-08	1.53359e-08	8.25598e-08	1.30272e-08	0.792871	4.58372e-08	0.207129	6.60158e-09	1.42452e-08
nodule	donor6_1.GAGGTACGCGTGTCCC.1	1.98064e-09	0.00239523	4.39198e-08	1.85791e-09	0.0765086	0.599063	0.139772	0.123023	0.0341529	0.0250848
nodule	donor6_1.GATAGAACCCGCTAGG.1	0.0494602	6.03714e-08	1.294e-07	0.0764708	0.0753642	0.263006	0.31159	0.224109	2.9869e-08	2.22705e-07
nodule	donor6_1.GATTGGGAAAGGTTGT.1	4.59144e-08	3.01945e-08	1.08067e-07	0.0502321	6.08911e-08	0.845644	2.27401e-07	0.104123	2.5955e-08	7.15126e-08
nodule	donor6_1.GCAAACCTTGGCCATA.1	0.0111979	0.00516024	0.0528532	0.0288546	0.0338444	0.642878	0.0536152	0.150905	3.16171e-09	0.020692
nodule	donor6_1.GCCAGGAAAGAACACT.1	3.0235e-08	1.50186e-07	2.08062e-07	0.00183471	0.0264408	0.917852	0.0135066	0.024509	6.83341e-08	0.0158561
nodule	donor6_1.GCCCGCGCGTAAACGG.1	2.06712e-07	2.46003e-06	5.61514e-07	4.43523e-07	5.03815e-07	0.811433	0.0787631	0.109798	2.49149e-07	5.91554e-07
nodule	donor6_1.GCCGCTTGTGAGAAAC.1	3.61693e-08	1.10922e-07	1.14342e-07	4.84135e-08	3.83487e-08	0.881622	1.78724e-07	0.114438	4.23763e-08	0.00393943
nodule	donor6_1.GCCTAGCGATCTGACC.1	5.60966e-08	1.42249e-07	8.61219e-08	1.28995e-07	1.67021e-07	0.844825	1.65268e-07	0.155174	5.42588e-08	9.2573e-08
nodule	donor6_1.GCGAAACGATCGGGAG.1	1.07558e-07	0.000624071	7.03209e-07	0.0590611	1.51561e-07	0.665946	0.189866	0.084501	2.78794e-07	2.202e-07
nodule	donor6_1.GCGGCTCTGACGTACC.1	0.00219749	5.71949e-08	1.47133e-07	6.12351e-08	8.27213e-08	0.910447	1.87778e-07	0.0873545	6.06302e-08	1.61804e-07
nodule	donor6_1.GCGGTTCCCTATCATG.1	0.00638923	0.0301198	0.148268	0.0262403	0.0668521	0.534708	0.123886	0.0199578	4.38189e-08	0.0435787
nodule	donor6_1.GCGTGGTACTGGGTTA.1	2.82727e-10	0.0230527	2.34954e-09	0.029228	2.22345e-09	0.829896	1.93377e-09	0.117823	1.04291e-09	6.28602e-10
nodule	donor6_1.GCTCCATGCAAAGCAA.1	2.50931e-08	1.35058e-08	7.43166e-08	4.87432e-08	0.0370719	0.746115	8.68207e-08	0.216812	1.36916e-08	1.02363e-06
nodule	donor6_1.GCTCTTTCCGCTAGTG.1	0.00338405	0.106641	0.0901687	0.0448322	0.00604461	0.511951	0.0927835	0.104109	0.0400852	2.55682e-09
nodule	donor6_1.GGACTCGACAGCGCAT.1	0.0511384	8.70243e-09	4.09243e-08	9.32455e-09	0.0804542	0.690214	0.178194	2.50319e-08	3.18325e-09	8.36448e-09
nodule	donor6_1.GGATTGCTGTGACTCC.1	2.87173e-08	1.04171e-08	0.00766442	0.0119208	0.0135118	0.649691	0.048962	0.253315	5.80266e-09	0.014935
nodule	donor6_1.GGCAAATTACTTTACT.1	5.10586e-09	4.26603e-09	9.2038e-09	3.68488e-09	2.30334e-08	0.922354	1.36489e-08	0.0776456	5.25558e-09	7.084e-09
nodule	donor6_1.GGCGCAGGACATCTTC.1	2.77737e-09	1.15082e-09	1.5517e-09	2.02721e-09	0.0742593	0.860262	5.73998e-09	0.0654784	2.28851e-09	4.18889e-09
nodule	donor6_1.GGGCAGGATTTCTGTG.1	2.70799e-07	0.0106619	0.0671266	0.0172728	0.0124106	0.674251	0.0738802	0.0899583	2.58821e-07	0.0544378
nodule	donor6_1.GGGCGGGTTCCCTACG.1	1.20295e-08	7.98333e-09	8.82107e-09	9.06642e-09	9.61726e-09	0.974964	1.46629e-08	0.0147596	4.82481e-09	0.010276
nodule	donor6_1.GGTCAAGACTACTTCG.1	1.53227e-09	4.67026e-10	6.99845e-10	0.0479305	5.25398e-09	0.792052	0.0265537	0.133464	3.05932e-10	2.00173e-09
nodule	donor6_1.GGTGTAAATCGATTGT.1	2.30197e-06	0.0511736	2.67942e-06	0.008383	1.4219e-06	0.706955	0.0636242	0.169853	2.69254e-06	1.9586e-06
nodule	donor6_1.GGTTAGTTACGGCGCC.1	5.88817e-09	3.06232e-09	0.248206	2.91584e-09	0.116873	0.286694	0.139643	0.208585	4.91096e-09	1.00557e-08
nodule	donor6_1.GGTTTAGCCTTTCTTG.1	1.44792e-09	9.08142e-10	0.00326156	0.0599373	0.00846565	0.745563	0.0615148	0.121257	1.09159e-09	2.30407e-09
nodule	donor6_1.GTACGCTTCATTGCAC.1	5.52426e-09	4.32269e-09	5.9816e-09	0.0628621	0.0108482	0.781645	0.102388	0.0422571	4.68793e-09	1.06558e-08
nodule	donor6_1.GTGGAGTCGGCGGTTG.1	0.0088566	0.0098933	0.0453456	0.0268124	0.00863316	0.718913	0.116526	0.0510729	6.73228e-08	0.0139469
nodule	donor6_1.GTTCCGTCCGCCTGCA.1	0.143402	0.0706968	0.0708447	5.9249e-07	0.145949	0.511024	2.25763e-05	0.0472365	0.0108226	1.69206e-06
nodule	donor6_1.TAACTATCGAAGGTCC.1	2.40069e-07	7.53877e-08	1.36334e-07	6.27012e-08	1.31951e-07	0.874574	6.38598e-07	0.125424	7.24101e-08	1.43099e-07
nodule	donor6_1.TAAGGCTGAATCCCTC.1	0.0102996	0.0125302	1.47575e-08	0.0257057	8.72016e-10	0.694787	0.116304	0.140373	1.93656e-09	1.04284e-08
nodule	donor6_1.TAAGTCGCCGAGTATC.1	0.00104183	9.38986e-09	1.80587e-08	0.0549325	2.07067e-08	0.782422	0.0157844	0.145819	9.66073e-09	5.1672e-08
nodule	donor6_1.TAATTACGTCAGTAGA.1	2.20582e-08	4.07004e-09	0.0255041	0.102402	8.54165e-07	0.462164	0.219065	0.162641	1.62645e-08	0.0282223
nodule	donor6_1.TACAGAAACGGTGGGC.1	4.00696e-10	1.44823e-08	0.0742492	7.2009e-09	2.55531e-09	0.545392	0.104587	0.275771	9.67914e-10	1.71894e-09
nodule	donor6_1.TACGCCTCCATTCCGA.1	3.56498e-10	2.44972e-10	1.81116e-09	0.0389297	9.9025e-10	0.661515	0.097113	0.187914	0.00704375	0.00748533
nodule	donor6_1.TAGACGCCCGTACCGG.1	4.25695e-09	0.0848054	0.114658	0.0642493	1.17234e-07	0.641068	0.0629064	0.0323123	2.12314e-08	2.24102e-08
nodule	donor6_1.TAGGTCCAAGTAAGGA.1	1.82623e-10	0.00476146	9.64138e-10	7.64998e-10	0.00791973	0.524274	0.0869711	0.345982	1.91276e-10	0.0300918
nodule	donor6_1.TATAGGGTACTCATGA.1	1.22858e-08	9.07415e-09	3.62787e-08	8.6863e-09	2.91979e-08	0.817755	5.9378e-08	0.182244	1.64043e-08	2.09276e-08
nodule	donor6_1.TATGGGACCGAGCAGG.1	2.24003e-09	1.21645e-09	2.53081e-09	3.98301e-09	1.85781e-09	1	2.56841e-09	6.4038e-09	1.1952e-09	2.40298e-09
nodule	donor6_1.TCCGATTACATTGCCG.1	1.46576e-09	1.29319e-09	0.052053	9.59454e-10	0.0267299	0.673804	1.30669e-08	0.247413	1.65988e-08	6.7202e-09
nodule	donor6_1.TCCGCCTGTCTACAAG.1	3.9256e-09	0.157816	0.0876417	0.0257954	1.041e-08	0.427648	0.0993176	0.0821116	0.11967	3.55688e-08
nodule	donor6_1.TCCGGTTCGTCCGGTC.1	9.86684e-08	8.91192e-08	1.79253e-07	0.0147614	1.44739e-07	0.749439	0.025607	0.210191	6.02075e-08	2.51479e-07
nodule	donor6_1.TCCTCTACGAGATGGC.1	3.97519e-09	9.20404e-09	1.02572e-08	0.0152819	1.69009e-08	0.797438	1.40149e-08	0.18728	5.12311e-09	1.47421e-08
nodule	donor6_1.TCCTTACGACGGTCCG.1	2.01005e-08	1.99662e-07	0.0188827	0.0260488	2.0298e-07	0.705768	0.0939959	0.155304	5.27198e-08	6.59148e-08
nodule	donor6_1.TCCTTTCTTACGCTTA.1	7.38945e-07	0.00107408	0.0047322	1.87921e-07	1.47246e-07	0.938248	0.0338838	2.22218e-06	0.0220579	3.92172e-07
nodule	donor6_1.TCGGAGAGTATCGGGA.1	4.96621e-07	0.069173	1.13406e-06	0.0390047	0.00808777	0.594503	0.289227	5.13642e-07	8.7173e-07	2.11723e-06
nodule	donor6_1.TCGTCAAGTACGCGCA.1	2.49317e-09	1.98568e-08	4.39087e-09	0.0284008	1.98123e-09	0.628976	0.134972	0.207651	1.48709e-08	3.01196e-09
nodule	donor6_1.TCTAGTGATATCGTGG.1	4.90738e-07	1.63958e-07	0.00972759	0.0448999	4.05465e-08	0.763547	0.105485	0.075639	0.0007005	2.93357e-07
nodule	donor6_1.TCTGAAGCACGTGGTC.1	5.33637e-08	0.0399704	0.0599612	0.0593161	1.8483e-08	0.605391	0.12483	0.110532	2.4716e-08	8.48934e-08
nodule	donor6_1.TCTGAATTCCGTACAA.1	1.90011e-08	0.0212232	0.0198631	0.0595462	2.6741e-08	0.687926	0.132948	0.0685299	5.64098e-09	0.00996286
nodule	donor6_1.TCTGATGTATTCTGTC.1	0.00177791	0.00107633	0.291267	0.203612	0.009132	0.32486	0.0269595	0.0681282	1.09926e-07	0.0731867
nodule	donor6_1.TCTTCCCATGGGCACA.1	2.06338e-09	1.45889e-09	0.241957	0.109425	0.036687	0.504958	0.0533709	0.053603	1.56889e-09	3.57571e-09
nodule	donor6_1.TGAACAAGCAGGGACT.1	0.00312902	0.00784244	0.0998491	0.00998036	1.82893e-09	0.542664	0.20163	0.131556	1.50347e-09	0.00334862
nodule	donor6_1.TGCGAATATGGGATTT.1	0.000678017	2.28619e-09	2.28587e-09	4.25965e-09	1.83984e-08	0.768123	0.15085	5.69517e-09	2.26063e-09	0.0803495
nodule	donor6_1.TGCTGGTTGGACAATT.1	1.32063e-07	6.63605e-08	1.69261e-07	5.44863e-08	8.72863e-08	0.879194	2.20794e-07	0.120805	7.72846e-08	1.48818e-07
nodule	donor6_1.TGGAGTGATGCGATGA.1	1.25151e-07	2.9837e-07	3.36897e-07	1.35035e-07	1.18496e-07	0.907647	2.5115e-07	0.0893073	0.00304253	2.25294e-06
nodule	donor6_1.TGGTTCAACGGGTAAT.1	2.0328e-09	2.67388e-09	0.0223382	0.0267972	0.0116779	0.714238	0.0684651	0.156483	2.49558e-09	1.80053e-09
nodule	donor6_1.TTAAACTCGAATTCAT.1	2.30962e-08	0.0996537	0.113582	0.119505	4.93664e-07	0.507385	0.0124038	0.147462	1.96026e-07	8.22778e-06
nodule	donor6_1.TTACCATTGATTACCC.1	1.02452e-07	1.5439e-07	1.59668e-07	5.73461e-08	0.0388628	0.674467	6.63448e-07	0.286669	8.87355e-08	2.7268e-07
nodule	donor6_1.TTCACTTCCTAGAACG.1	0.062551	6.73233e-07	0.0290859	0.0495299	0.024717	0.523535	0.246172	0.0644066	9.39123e-07	7.9845e-07
nodule	donor6_1.TTCAGTTCAAGAGGAG.1	3.87797e-10	5.35769e-10	6.20673e-10	1.89586e-10	4.85385e-10	0.962931	0.0185767	0.0184926	7.35124e-10	7.64456e-10
nodule	donor6_1.TTCGACAGAGCCCGTG.1	0.0260173	9.32514e-09	0.182515	0.00138167	0.0957571	0.627265	9.46163e-08	0.0670642	4.57585e-09	4.52583e-09
nodule	donor6_1.TTGATTATGCAGATGA.1	6.47955e-06	1.38259e-06	1.64434e-05	5.14576e-06	1.75994e-06	0.839559	3.38814e-06	0.160399	2.87684e-06	4.24173e-06
nodule	donor6_1.TTGCCCTGATCACGGG.1	3.58228e-08	3.60909e-08	8.74694e-08	2.33496e-08	0.0820929	0.917906	8.50744e-08	3.18751e-07	3.55605e-08	1.47618e-07
nodule	donor6_1.TTGGACCATCTGGCAA.1	1.31238e-07	6.23485e-09	6.06633e-08	0.00181932	6.14656e-08	0.641846	0.100254	0.25608	9.0602e-09	8.60267e-09
nodule	donor6_1.TTGGCTCGCATGAGAC.1	3.64445e-09	4.36609e-09	8.92231e-09	6.91148e-09	2.83328e-09	0.824735	4.85355e-09	0.175265	8.28995e-09	5.06593e-09
nodule	donor6_1.TTGGTCACACTCGTAA.1	0.0327988	0.0174534	0.0689621	0.0848376	0.0675513	0.524245	0.128888	0.0523852	0.0228778	6.02719e-07
nodule	donor6_2.AAACAAGTATCTCCCA.1	5.95012e-08	0.0885247	0.00618122	0.0120278	0.0697024	0.585029	0.214534	0.0224099	0.00159024	3.18125e-07
nodule	donor6_2.AAACCGGAAATGTTAA.1	9.96421e-09	0.0694009	0.0108725	0.0466831	0.0232688	0.515717	0.0807391	0.189876	2.00354e-09	0.063442
nodule	donor6_2.AAACCGTTCGTCCAGG.1	2.18045e-08	6.62801e-09	2.16205e-08	9.04419e-08	0.0417066	0.709826	0.165504	0.0804928	6.32958e-09	0.00247037
nodule	donor6_2.AAACGGTTGCGAACTG.1	2.43383e-10	2.60439e-10	1.75288e-09	2.1717e-10	0.0347113	0.961887	0.000484206	0.00291719	8.65366e-09	3.72344e-10
nodule	donor6_2.AAACTCGGTTCGCAAT.1	1.03636e-07	0.0398372	0.0501278	0.00743034	0.00909784	0.78237	6.31793e-07	0.0496649	0.0614716	1.92021e-07
nodule	donor6_2.AAAGTGTGATTTATCT.1	0.000596071	0.0210376	5.49569e-07	2.95566e-07	0.0368909	0.845915	8.99532e-07	0.0955563	9.76234e-07	1.51075e-06
nodule	donor6_2.AAATAAGGTAGTGCCC.1	1.24676e-08	0.0211771	0.0369509	0.114506	4.23405e-09	0.638337	0.0654979	0.119294	0.00423664	1.25813e-08
nodule	donor6_2.AACAGGATGGGCCGCG.1	1.79084e-08	5.71412e-08	6.12576e-08	0.0533255	2.28175e-08	0.677523	0.00862472	0.260527	1.0975e-08	3.09234e-08
nodule	donor6_2.AACATATCAACTGGTG.1	1.62737e-09	2.77921e-08	0.0809343	0.0477348	0.00812186	0.81776	3.36169e-09	0.0454491	2.20962e-09	2.24366e-09
nodule	donor6_2.AACGCGACCTTGGGCG.1	0.0066233	8.678e-08	1.95301e-07	0.0654306	0.0442188	0.735719	0.0207182	0.0842521	8.87087e-08	0.0430371
nodule	donor6_2.AACGTACTGTGGGTAC.1	0.000580749	0.00286792	9.62548e-07	0.00410104	5.16115e-07	0.885141	0.086184	0.0012154	2.75403e-07	0.0199079
nodule	donor6_2.AACTACCCGTTTGTCA.1	9.93475e-09	0.0447952	2.46793e-08	0.00197623	2.59365e-08	0.608545	0.0391671	0.239563	0.0659534	1.40403e-08
nodule	donor6_2.AACTCCAGAGCGTGTT.1	0.00279689	0.0577565	4.30785e-07	0.0435003	0.0169957	0.832088	0.0468582	3.14239e-06	3.86541e-07	6.67176e-07
nodule	donor6_2.AACTCTCAGTGTGCTC.1	3.42758e-07	1.14802e-07	2.00836e-06	0.0491074	0.048271	0.698388	0.0833288	0.106306	1.09502e-07	0.0145964
nodule	donor6_2.AAGGTGATAAACCAGC.1	0.00306094	1.64068e-09	0.167466	0.0174682	3.19778e-10	0.591223	0.0666575	0.154124	3.78969e-10	7.09411e-10
nodule	donor6_2.AAGTAGTGACGCGAGG.1	4.1768e-08	0.0134099	0.0336394	2.69156e-08	0.0601298	0.758428	2.59106e-06	0.13439	2.64324e-08	3.9418e-07
nodule	donor6_2.AAGTGTTTGGAGACGG.1	0.00414367	0.112079	6.13161e-08	0.0430555	2.89803e-08	0.576164	0.130813	0.0521412	0.0816033	3.70954e-08
nodule	donor6_2.AAGTTCACTCCAAGCT.1	0.0117116	0.0109587	0.0243141	0.118693	2.05135e-09	0.245211	0.0582997	0.502458	0.0283535	2.98355e-09
nodule	donor6_2.AATAATCTTCGTATCG.1	0.0284586	2.03104e-07	0.0950386	0.0506213	4.26732e-07	0.617463	0.159091	0.0493252	5.31384e-07	6.42079e-07
nodule	donor6_2.AATCGTGAGCCGAGCA.1	7.2697e-07	4.43937e-07	6.13689e-07	3.06536e-07	1.1089e-06	0.930258	0.0244296	0.0382535	8.2806e-07	0.00705529
nodule	donor6_2.ACAAGGATGCTTTAGG.1	6.05984e-09	1.38431e-08	0.00302226	0.0260988	5.46008e-09	0.853455	6.56769e-09	0.117423	7.97161e-09	7.31867e-09
nodule	donor6_2.ACATCGGTCAGCCGCG.1	4.22771e-09	1.60335e-08	1.22856e-08	3.59936e-09	0.0222041	0.791057	0.0769752	0.109764	6.46847e-09	2.43528e-08
nodule	donor6_2.ACCCTCCCTTGCTATT.1	0.0315339	0.0275853	7.60515e-09	0.0257155	0.0168217	0.591579	0.0601422	0.186258	9.79338e-09	0.060365
nodule	donor6_2.ACCGATAGGCATAACC.1	1.35221e-07	2.02853e-06	0.115483	0.0110512	3.28505e-07	0.529463	0.211712	0.104188	2.29916e-07	0.0280998
nodule	donor6_2.ACCTACTATAAATCTA.1	2.09604e-09	0.151806	0.157857	0.00641947	0.00589557	0.495637	0.0933967	0.0888899	9.77421e-05	2.63481e-08
nodule	donor6_2.ACCTCCGTTATTCACC.1	1.69708e-09	0.134056	2.3057e-08	0.00551723	7.25915e-09	0.679873	0.0062374	0.138033	2.95832e-09	0.0362824
nodule	donor6_2.ACGAAATGGGCGGCAC.1	6.0113e-10	0.0701362	1.77102e-09	9.00713e-10	0.00119657	0.632641	0.0686011	0.227425	2.7567e-09	1.35586e-09
nodule	donor6_2.ACGAGTACGGATGCCC.1	4.37657e-09	0.0773792	4.18374e-08	0.0547761	3.71955e-09	0.537731	0.151418	0.178695	7.06291e-09	2.81312e-09
nodule	donor6_2.ACGCAAACTAATAGAT.1	0.0144842	0.0216402	0.0729967	0.0302293	0.0233853	0.464153	0.140753	0.15273	1.46142e-07	0.0796286
nodule	donor6_2.ACGCTAGTGATACACT.1	1.54563e-08	0.00434049	0.160393	0.072412	1.3843e-08	0.512519	0.143536	0.0753806	5.64105e-09	0.0314186
nodule	donor6_2.ACTCCCGAATTCGTTT.1	7.41383e-08	0.0343642	0.0324281	3.73714e-08	3.18784e-07	0.685461	0.079563	0.168182	4.19489e-07	9.55558e-08
nodule	donor6_2.ACTTCCATGCGGGACA.1	0.00278551	2.13623e-08	6.1483e-08	7.069e-08	4.73109e-07	0.91407	0.0305996	0.0525437	2.37382e-08	3.65637e-08
nodule	donor6_2.AGACTGTTACCGGGTC.1	1.65181e-09	0.255508	0.013443	9.07937e-09	0.0751695	0.501	0.129267	0.0256122	2.2781e-09	5.74939e-09
nodule	donor6_2.AGATAACTTCAGGGCC.1	5.79181e-08	0.0127978	0.299321	0.0410398	0.0178745	0.581733	4.09286e-08	1.94078e-07	0.0127481	0.0344851
nodule	donor6_2.AGCATATCAATATGCT.1	0.0220184	0.259954	1.2426e-09	4.47134e-10	3.7558e-10	0.600365	1.02059e-09	5.04362e-09	0.117662	6.29582e-10
nodule	donor6_2.AGCATTACGAGGCAAG.1	0.020338	0.153688	1.06569e-06	3.15657e-08	3.44559e-08	0.747084	7.54508e-08	0.0599221	0.0189671	1.8521e-07
nodule	donor6_2.AGGATATAGGGATTTA.1	1.17779e-06	6.46133e-08	0.155906	7.67158e-08	8.0138e-08	0.581586	0.149048	0.0837437	0.00858948	0.0211252
nodule	donor6_2.AGGCCACATTGGTTAC.1	1.54678e-08	0.123764	1.03465e-07	2.57512e-08	8.69819e-09	0.740126	1.05381e-07	0.136111	5.10839e-08	1.53344e-08
nodule	donor6_2.AGGCCTGAGAATCTCG.1	2.56785e-07	5.07093e-07	2.4137e-07	3.08281e-07	0.0374702	0.733438	5.25879e-07	0.17737	0.0509503	0.0007697
nodule	donor6_2.AGGGACTCTACGCGAC.1	6.91226e-09	0.0547556	0.00201302	2.35925e-08	8.35905e-09	0.764833	0.167154	0.0112437	3.69096e-07	8.64796e-08
nodule	donor6_2.AGTCTAAAGTATACTC.1	3.52358e-08	0.00356617	0.120723	0.0474903	0.124028	0.684136	0.0200553	1.59104e-07	6.07214e-08	8.56389e-08
nodule	donor6_2.AGTGCTAAACACAGCA.1	3.2489e-09	2.64533e-09	1.81957e-07	3.64327e-09	1.57642e-08	0.812959	0.126586	0.0366035	1.46648e-09	0.0238507
nodule	donor6_2.AGTTTGGCCAGACCTA.1	9.49273e-08	0.467238	2.43913e-07	8.80101e-08	1.2048e-07	0.285688	1.02942e-07	1.5233e-07	0.247072	7.14504e-07
nodule	donor6_2.ATAAATATTAGCAGCT.1	0.0109981	0.00839322	6.81404e-09	0.0122547	0.0140556	0.830965	0.028291	0.095042	3.79762e-09	9.33697e-09
nodule	donor6_2.ATAAGTAGGGCGACTC.1	3.18822e-09	3.0844e-08	1.01889e-08	0.0314775	0.15645	0.594227	0.147458	2.29187e-09	1.38402e-09	0.0703871
nodule	donor6_2.ATACGCCGGCGAAACC.1	3.12729e-09	0.00548374	0.0508174	0.0118228	8.84509e-09	0.690983	0.0271755	0.213717	5.11095e-08	2.77976e-08
nodule	donor6_2.ATATAAATGTAGCTGC.1	0.00514582	4.93001e-08	0.00107191	1.59764e-08	1.48091e-07	0.874868	0.0756358	0.0349953	0.00828285	6.55121e-08
nodule	donor6_2.ATCAAACGAAGGTTTG.1	4.28755e-07	0.210159	4.93933e-08	2.17335e-08	0.0024821	0.420896	7.34147e-07	0.318277	0.0481837	8.33059e-08
nodule	donor6_2.ATCCTGCGTGGAATGG.1	1.26007e-09	3.97564e-08	9.17496e-10	0.00283523	6.50572e-10	0.880396	3.25104e-09	0.0903258	6.2241e-10	0.0264429
nodule	donor6_2.ATCGCCAGTCAACATT.1	3.79185e-09	0.0553564	0.0296984	1.13235e-09	6.17632e-09	0.78423	0.0748088	0.0559066	4.16976e-08	5.48078e-09
nodule	donor6_2.ATCTCCCACGGAATAT.1	0.0259411	6.40776e-08	8.14238e-08	0.00753708	0.00931316	0.664557	0.133751	0.1589	4.2457e-08	2.4815e-07
nodule	donor6_2.ATCTGACATGGAAGGA.1	2.87736e-07	3.31326e-07	3.15086e-07	0.0506587	6.33066e-07	0.720621	2.52466e-07	0.200104	0.0157743	0.0128404
nodule	donor6_2.ATCTGCACCTCTGCGA.1	3.10163e-08	6.49717e-09	0.0933498	0.0365115	0.0119381	0.511465	0.086375	0.216978	5.36824e-08	0.0433821
nodule	donor6_2.ATCTTGACTTGTCCAA.1	3.08089e-08	1.05924e-07	1.02656e-07	0.0384911	0.0450784	0.642003	0.184163	0.0902635	9.51775e-08	9.94336e-08
nodule	donor6_2.ATGCCATTTGCGACCA.1	3.59472e-08	0.0485615	0.127632	0.0344561	0.060556	0.544163	0.090697	0.0939342	7.30269e-08	4.18709e-08
nodule	donor6_2.ATTCAACCATTTAAGG.1	4.70248e-08	1.8335e-07	1.53896e-07	0.0546397	8.3052e-08	0.519476	0.177391	0.248492	4.34183e-08	4.04234e-07
nodule	donor6_2.ATTGCTGCTCCTCCAT.1	2.76398e-09	2.8701e-09	1.07239e-08	1.88246e-09	4.94995e-08	0.909052	6.97043e-09	0.0909481	6.80985e-09	3.94181e-09
nodule	donor6_2.ATTGTTCAACGATCCG.1	6.34545e-08	5.98985e-08	2.33292e-07	8.3205e-08	0.0912148	0.637006	4.4606e-07	0.271777	6.14704e-07	6.59941e-08
nodule	donor6_2.ATTTACTAAGTCCATT.1	0.00215692	0.0490473	1.62616e-06	0.00988105	0.00065203	0.735891	0.149732	0.0288469	0.0237886	1.99102e-06
nodule	donor6_2.CAAGGTCCTATAGGCT.1	1.29857e-07	0.383166	0.00275283	3.00886e-07	2.86474e-07	0.488384	7.09013e-06	0.0323048	0.0933834	7.67723e-07
nodule	donor6_2.CACATCTCACCGACGA.1	9.32653e-06	2.96366e-06	6.95823e-06	3.95105e-06	2.84975e-05	0.932914	0.000658033	0.0663534	1.40756e-05	8.45731e-06
nodule	donor6_2.CACTACGGGAGCTGCC.1	2.60749e-08	4.48694e-08	6.08702e-08	3.9288e-08	0.0209161	0.823797	0.0722317	0.083055	8.63713e-08	3.18561e-08
nodule	donor6_2.CACTCGAGCTGAACAA.1	2.57596e-08	4.017e-08	0.0181668	0.00599675	0.0455175	0.685647	0.163193	0.0792806	7.05034e-08	0.00219754
nodule	donor6_2.CACTCTCAAGCATCGA.1	3.34198e-08	1.39488e-07	1.13252e-07	0.0160101	2.07396e-07	0.868567	4.37291e-07	0.0948166	1.90693e-07	0.0206053
nodule	donor6_2.CATACCCGTACCCAGT.1	3.47838e-06	0.108469	0.0563115	1.26982e-06	5.66423e-06	0.531297	0.211569	0.0920008	0.000337644	3.73383e-06
nodule	donor6_2.CATCATTACCCTGAGG.1	2.31853e-08	2.96108e-08	3.34127e-08	0.0655925	0.0243669	0.530285	0.159172	0.220583	2.67688e-08	7.20002e-08
nodule	donor6_2.CATCCTCTCAAAGATC.1	8.42447e-09	6.85436e-09	1.66461e-08	2.16014e-06	1.55277e-08	0.990355	7.83503e-08	0.00964315	3.26379e-08	2.03344e-08
nodule	donor6_2.CCAACTTGATAGATCC.1	0.000284146	0.0158743	2.15037e-08	1.37092e-08	0.045351	0.699256	0.0464012	0.192833	6.23282e-09	1.18397e-08
nodule	donor6_2.CCACCAACTTTACTGT.1	3.3883e-07	6.15796e-07	8.13207e-07	0.0273694	1.89751e-07	0.668529	0.0438716	0.260227	9.57007e-08	1.83683e-07
nodule	donor6_2.CCACGGTGCCCGGTAG.1	6.9743e-08	5.42315e-08	3.23674e-07	0.00994898	0.027267	0.90731	3.99043e-07	0.0554732	1.05606e-07	3.79987e-08
nodule	donor6_2.CCCATATAGGTCGATT.1	4.58391e-08	5.07144e-08	7.56529e-08	5.65666e-08	6.75989e-07	0.936984	0.0630143	3.04311e-07	1.07061e-07	7.74831e-08
nodule	donor6_2.CCCTCCTCGCTCGTAT.1	1.40465e-09	0.0797587	3.80113e-09	1.08234e-09	2.37287e-09	0.651617	2.1052e-09	9.78393e-09	0.213383	0.0552418
nodule	donor6_2.CCGCCGTTGAGGATAA.1	3.63899e-08	7.03366e-08	2.71746e-07	1.8922e-07	4.61691e-08	0.737458	0.100235	0.162306	5.67762e-08	5.84942e-08
nodule	donor6_2.CCGCGGGTACGAAGAA.1	2.02839e-10	0.0668911	0.0166651	1.69066e-10	0.0584877	0.509942	0.127108	0.220907	2.26782e-10	5.55325e-10
nodule	donor6_2.CCGTAAGTTGGTCCCA.1	1.11666e-07	0.0251233	0.000274529	1.41041e-06	2.78972e-07	0.931806	0.00830239	5.46392e-07	3.32613e-07	0.0344914
nodule	donor6_2.CCTAGGCGTAGCGATC.1	5.9524e-07	0.0245553	0.225361	0.0192373	0.0467213	0.483777	5.89303e-06	0.194098	0.00624101	2.32276e-06
nodule	donor6_2.CCTTCAGTTAAAGTGA.1	6.40919e-09	0.00323575	8.21494e-09	0.01188	0.212154	0.728517	0.00108017	4.44883e-09	0.0431329	4.19336e-09
nodule	donor6_2.CGACAGTTCGCGTTAT.1	4.3634e-10	3.57431e-10	1.18691e-09	4.75549e-10	4.41266e-10	0.985503	9.07423e-10	0.0144965	3.8019e-10	7.83113e-10
nodule	donor6_2.CGAGAGCTTTCACTAC.1	7.56104e-08	0.0893303	2.82433e-08	8.74171e-09	2.7213e-08	0.818033	1.94547e-08	0.0348378	0.0577984	1.30216e-08
nodule	donor6_2.CGAGATTTCGCTCGGG.1	3.85768e-08	0.0394034	1.88819e-08	0.0285371	0.0143681	0.558125	0.120849	0.152374	0.022252	0.0640905
nodule	donor6_2.CGATAATACTCAGGTT.1	8.96024e-08	4.78442e-09	0.0718228	6.04521e-09	1.47684e-08	0.532137	0.261896	0.0927312	3.06215e-08	0.0414124
nodule	donor6_2.CGATGGACCCTACGCC.1	1.92913e-09	0.00350214	0.00678813	0.028444	1.36814e-09	0.718054	0.0296324	0.165376	3.68307e-09	0.0482036
nodule	donor6_2.CGCATGCCGAATGCGT.1	2.3858e-09	1.30993e-09	9.77821e-09	2.54384e-09	0.0342757	0.749593	0.0267134	0.168922	0.0204956	2.72912e-09
nodule	donor6_2.CGGCCAGAGCGACCAT.1	1.10822e-07	0.0324675	2.0726e-07	0.00384197	0.0892059	0.654511	9.03439e-08	0.180366	6.50397e-08	0.0396073
nodule	donor6_2.CGGGAGCTTCAGTGTA.1	2.2546e-09	3.16404e-10	0.205424	0.0123492	0.0925367	0.51691	0.0489887	0.0857933	4.26596e-10	0.0379986
nodule	donor6_2.CGGTTATCCAACAGTG.1	0.00857352	5.9895e-07	0.153443	0.0750145	0.023736	0.613996	0.0332933	0.091942	2.53627e-07	2.20759e-07
nodule	donor6_2.CGGTTCAAGTAGGTGT.1	6.46255e-10	4.33961e-09	0.048601	0.0438241	0.0429892	0.810579	0.0148989	0.0298608	1.60009e-09	0.00924718
nodule	donor6_2.CGTCGGATAGTGTTGA.1	2.5725e-07	0.0304514	0.112082	0.0694615	1.90332e-07	0.637802	0.0100849	0.140117	3.9278e-07	3.43286e-07
nodule	donor6_2.CGTGTGTTAAACCCTG.1	1.02502e-08	0.0269088	0.158164	0.0647022	3.8822e-09	0.587615	0.137593	0.0250164	1.10983e-08	9.41927e-09
nodule	donor6_2.CTACACTCGCAGATGG.1	1.51612e-08	9.51489e-09	2.87473e-08	0.0100238	0.0366107	0.691559	1.29864e-07	0.099343	1.62309e-08	0.162463
nodule	donor6_2.CTAGATGTGAGTGTAA.1	2.14655e-09	2.73904e-09	0.176985	0.0402542	0.0858858	0.51951	0.0534589	0.123906	2.57198e-09	2.72011e-09
nodule	donor6_2.CTAGCCACAGGCGAGC.1	2.11466e-07	3.78104e-08	1.64935e-07	0.0113826	0.0799356	0.706625	0.0152725	0.124366	3.31612e-08	0.0624183
nodule	donor6_2.CTAGGCGCCCTATCAG.1	7.11228e-08	0.0392552	2.65622e-07	0.0219195	1.94052e-07	0.753213	0.0324289	0.129401	0.0237823	1.2283e-07
nodule	donor6_2.CTATCGCGTAGAGAAC.1	8.83893e-08	0.0295435	0.0326417	6.36718e-07	0.0903788	0.614202	0.0949298	0.138303	2.08433e-07	1.90862e-07
nodule	donor6_2.CTATGGGAAGCGGAAT.1	1.03188e-08	1.59664e-08	9.20378e-08	0.0175177	0.0892914	0.513705	0.339263	0.0402221	5.24274e-08	8.45937e-08
nodule	donor6_2.CTCAAACCACTGCCCG.1	0.00175911	8.88095e-08	2.5082e-07	0.0168754	1.06493e-07	0.663858	1.77769e-07	0.317505	5.36381e-07	1.08926e-06
nodule	donor6_2.CTCAGTCACGACAAAT.1	1.45657e-08	0.0404561	0.0160215	0.0370892	0.15397	0.720569	0.0269605	7.75043e-08	0.00493415	1.00496e-07
nodule	donor6_2.CTCGATATTTGCGAGC.1	2.26356e-10	0.0367412	0.0135726	0.0443119	3.23883e-10	0.727178	0.00984597	0.161526	3.14731e-09	0.00682451
nodule	donor6_2.CTGAGAAAGTTCGGCG.1	0.0164666	0.00898515	0.00129647	0.00436025	1.73889e-05	0.569261	0.0827818	0.316831	5.17735e-08	9.74778e-08
nodule	donor6_2.CTGCTTGGCGATAGCT.1	0.0134217	2.80808e-08	0.0360798	1.98014e-08	0.00312228	0.734671	0.212704	2.99046e-07	1.1683e-07	6.11453e-08
nodule	donor6_2.CTGGCGCACAGGTCTG.1	1.09064e-07	3.62961e-07	1.9893e-06	0.0932907	0.0763482	0.745526	0.0622477	0.0225847	1.48098e-07	1.92425e-07
nodule	donor6_2.CTGGTTCGCGAGCTAC.1	3.46106e-07	6.76959e-09	3.63282e-08	0.0269701	0.000734794	0.774947	0.00271352	0.194635	1.23421e-08	1.35098e-08
nodule	donor6_2.CTGTGCAGGGTAGGTC.1	0.00864638	1.30842e-08	0.0738668	0.0267101	1.85065e-08	0.59683	0.130953	0.162993	2.91045e-08	2.09701e-08
nodule	donor6_2.CTTGAGTTAGGGTAAT.1	5.51088e-09	1.94558e-08	0.0628835	5.1171e-09	0.0330181	0.697869	0.176713	6.0707e-08	0.0198658	0.0096506
nodule	donor6_2.CTTTACCGAATAGTAG.1	2.18214e-09	2.91851e-09	0.0582843	0.000429489	0.00738636	0.761982	0.171918	5.62119e-09	5.85304e-09	9.93835e-09
nodule	donor6_2.CTTTGGGATTGTTGCA.1	2.10529e-09	3.60467e-08	0.0511902	2.23764e-09	0.0568698	0.617067	0.171852	0.00867042	0.0583535	0.0359967
nodule	donor6_2.GAAGCCACTGATTATG.1	2.84734e-08	0.0027385	8.37143e-08	6.68055e-09	7.17201e-08	0.699094	0.108441	0.105993	0.0371751	0.0465583
nodule	donor6_2.GAATGTGGTCCGGATT.1	0.00718125	0.147403	5.50908e-08	3.60206e-08	4.25717e-05	0.778068	7.63708e-08	0.0673053	4.96088e-08	1.22766e-07
nodule	donor6_2.GAATTTCTCGCTGCAG.1	7.99289e-11	0.254799	2.47339e-10	1.44522e-10	2.81254e-10	0.522769	2.42075e-10	0.172989	0.0386115	0.0108309
nodule	donor6_2.GACATCCGTCGAACTG.1	1.82638e-07	0.0413309	7.30501e-07	3.59925e-07	4.9705e-07	0.71973	0.104037	0.0823928	0.052506	1.47061e-06
nodule	donor6_2.GAGAACGGTTCTGACT.1	1.0428e-08	0.209228	1.83044e-08	5.05723e-09	4.11315e-08	0.700874	1.48946e-08	0.0343344	0.0555631	3.68495e-08
nodule	donor6_2.GAGCACCTGTGTCCAG.1	1.86062e-08	3.16167e-08	1.16228e-07	0.0020301	2.24362e-07	0.900475	0.0684407	1.03672e-07	2.7394e-08	0.0290537
nodule	donor6_2.GAGCCAGCTACCTGTG.1	1.89187e-08	2.80556e-08	0.132419	0.0191287	3.78338e-08	0.735646	0.112805	2.40274e-07	6.24671e-08	2.31089e-07
nodule	donor6_2.GAGCGGAATGCGGTGT.1	8.18485e-08	0.0101626	4.67243e-07	1.18594e-07	2.06997e-07	0.851866	1.82996e-07	0.127605	0.0103651	2.69061e-07
nodule	donor6_2.GAGGCTATCAAAGTCG.1	0.0108888	0.0172138	0.101301	7.66583e-10	1.50915e-09	0.621748	0.0150274	0.228796	0.00502435	1.44763e-09
nodule	donor6_2.GATATGAGACACTAAC.1	7.77957e-10	1.19467e-09	0.0737942	0.0506325	5.49942e-09	0.79075	5.85001e-09	0.0848235	1.35073e-09	2.7807e-09
nodule	donor6_2.GATTACTGAATTTGGG.1	2.50252e-08	0.00218524	0.0317282	2.1786e-08	5.7291e-08	0.836775	5.37309e-07	0.12931	4.61767e-08	1.12836e-07
nodule	donor6_2.GCAGTGCGGGCGGATG.1	9.90081e-08	0.00100621	2.64366e-07	9.30133e-08	0.023981	0.943748	0.0302126	0.00105117	1.61945e-07	4.26681e-07
nodule	donor6_2.GCATTCAAGGCAACGC.1	1.64499e-07	6.44707e-07	0.147438	0.049574	1.02793e-07	0.60146	0.128976	0.0725484	7.15152e-07	1.14761e-06
nodule	donor6_2.GCCAATAGGGCATCTC.1	1.17148e-09	2.9575e-09	6.01472e-09	0.0712716	4.62914e-09	0.602705	0.157233	0.150255	0.0185355	2.25784e-09
nodule	donor6_2.GCCTCCGACAATTCAC.1	2.80416e-08	1.82826e-09	3.8234e-09	0.0142162	8.83039e-09	0.916067	0.0155395	0.0541771	2.34017e-09	9.73853e-09
nodule	donor6_2.GCGAAGAATCTGACGG.1	0.018158	1.27288e-09	2.47375e-09	1.70842e-09	1.15243e-09	0.94368	2.48691e-09	0.038162	1.28923e-09	3.44403e-09
nodule	donor6_2.GCGAGAGTTGCGTCCA.1	0.0177323	0.046938	5.75341e-09	0.0462511	0.00889653	0.597985	0.144914	0.137283	1.62409e-09	9.04244e-09
nodule	donor6_2.GCGCTCGATCACCTGT.1	0.0145289	0.00817264	1.43428e-09	0.113757	0.0261399	0.54304	0.125458	0.168903	5.35207e-10	1.77037e-09
nodule	donor6_2.GCGCTGCTTTGCATTT.1	3.72947e-09	0.0316937	0.0636663	0.0705862	6.39386e-05	0.601678	1.40317e-08	0.217858	0.0144545	8.51283e-09
nodule	donor6_2.GCGTGGTACTGGGTTA.1	4.91121e-09	1.06415e-08	0.0783566	0.127677	0.0491047	0.656777	0.0095355	0.0785489	1.62427e-09	3.7896e-09
nodule	donor6_2.GCTAACTGAAGTCTGA.1	0.0104279	2.2626e-08	3.3575e-07	0.0207399	4.43233e-08	0.775067	0.139472	0.0396243	1.98379e-08	0.014669
nodule	donor6_2.GCTAAGTAGTTTCTCT.1	1.0792e-08	0.03274	0.00509228	0.00475255	4.65831e-09	0.891356	3.02024e-08	0.0432586	0.0186301	0.00417031
nodule	donor6_2.GCTACAATCGAGGATA.1	9.36934e-11	3.61628e-10	1.68104e-10	0.00110959	2.94277e-10	0.903256	3.76599e-10	0.0956344	1.29665e-10	1.21289e-10
nodule	donor6_2.GCTAGAGTAGAGATGT.1	0.000495069	0.00645907	0.0823052	5.97148e-09	1.72031e-09	0.745861	0.104222	0.0606581	2.75291e-09	9.24224e-09
nodule	donor6_2.GCTCCATGCAAAGCAA.1	0.00892017	7.62326e-09	0.094552	1.32673e-08	1.103e-07	0.711208	0.0606289	0.124691	3.13881e-08	1.06592e-08
nodule	donor6_2.GCTGCTCTCCGGACAC.1	2.1937e-07	3.86177e-08	0.0327902	0.0402451	0.0830961	0.5273	0.0297867	0.286782	2.04353e-08	2.62643e-08
nodule	donor6_2.GCTGTTGCTACCGAAC.1	2.01787e-09	0.037069	0.0615143	0.077667	0.0114741	0.599224	0.148618	0.0202598	0.00470173	0.0394717
nodule	donor6_2.GCTTATGAAGCAGGAA.1	3.26712e-09	9.81445e-10	3.93309e-09	0.0562057	4.31805e-09	0.909095	3.2339e-09	0.0346989	1.80584e-09	3.88982e-09
nodule	donor6_2.GCTTGGATCGATTAGG.1	0.0038441	1.39764e-09	0.0917326	0.0701906	5.90681e-09	0.6354	0.0685688	0.130263	1.35822e-09	4.9365e-09
nodule	donor6_2.GGCAGCAAACCTATGC.1	1.56309e-09	7.59763e-10	1.69841e-09	5.96274e-10	0.0117491	0.839737	0.098032	0.0504816	5.44257e-10	3.09843e-09
nodule	donor6_2.GGCGCGGAGATCTTTC.1	1.43442e-07	0.144553	4.1547e-07	0.062881	0.0788227	0.459502	0.0952274	0.0165785	0.140736	0.00169961
nodule	donor6_2.GGCGCTTCATTCCCTG.1	5.42843e-06	7.68943e-08	1.95021e-07	2.85527e-07	3.97289e-07	0.846199	5.8429e-06	0.153785	8.91814e-08	3.84181e-06
nodule	donor6_2.GGCTACTATACACTCC.1	3.06497e-08	0.021243	6.49402e-08	4.26072e-08	1.97905e-08	0.729111	0.0241455	0.21618	2.55489e-08	0.00931964
nodule	donor6_2.GGGAACGGGAGGTTAG.1	5.9091e-08	4.56429e-08	6.56312e-08	1.03244e-07	4.61095e-08	0.738325	8.84774e-08	0.261674	3.54389e-08	5.52084e-08
nodule	donor6_2.GGGAAGGGCTTTCTCA.1	4.5188e-08	6.48683e-08	0.0935973	0.0105548	0.0186325	0.808283	0.0689309	3.40008e-07	1.0366e-07	5.27531e-07
nodule	donor6_2.GGGCGGCAAATGAATT.1	3.17609e-09	7.42865e-09	3.7958e-09	3.60641e-08	6.01188e-09	0.841889	1.01729e-08	0.158111	1.75566e-09	5.46735e-09
nodule	donor6_2.GGTACCATTAAGACGG.1	5.05271e-09	5.32429e-09	1.06851e-08	0.0354437	4.49437e-09	0.704882	0.11735	0.115934	3.29452e-09	0.0263897
nodule	donor6_2.GGTAGAAGACCGCCTG.1	3.94577e-09	2.57584e-08	6.03922e-09	2.04938e-08	0.0160397	0.856494	0.0256649	0.101801	3.66472e-09	7.91188e-08
nodule	donor6_2.GGTAGTGCTCGCACCA.1	3.77753e-07	0.0335828	1.07252e-06	3.21838e-07	0.0167364	0.932058	3.28041e-06	0.0176158	5.45454e-07	1.57131e-06
nodule	donor6_2.GGTATAGTGACACATA.1	0.00361255	6.1952e-08	0.0862472	0.0790164	1.81014e-08	0.668526	0.109602	0.0529956	1.01682e-08	1.1962e-07
nodule	donor6_2.GGTCGGATAAACGGCG.1	0.00463832	5.56924e-08	0.0551268	0.0690937	4.71838e-08	0.749474	0.0562928	0.055106	0.0102685	2.52415e-08
nodule	donor6_2.GTAACTGCCCAAGGAG.1	0.0174537	1.30727e-10	3.98339e-10	4.51809e-10	1.62116e-10	0.963753	7.21027e-09	0.0187934	3.53783e-10	6.62546e-10
nodule	donor6_2.GTAAGTAACAGTCTGG.1	2.48067e-09	4.81664e-09	0.0152229	0.0485277	0.00924955	0.792623	0.00430511	0.130072	4.2238e-09	7.58108e-09
nodule	donor6_2.GTAATCTGATTCTTCG.1	1.94074e-08	4.54113e-08	1.1319e-07	7.91733e-07	4.33082e-08	0.823136	5.99609e-08	0.176862	2.19132e-08	1.37474e-07
nodule	donor6_2.GTACTCCTGGGTATGC.1	7.11531e-08	0.0332255	0.0999157	0.0453244	2.02116e-07	0.593246	1.24144e-07	0.228287	3.81997e-07	1.68171e-07
nodule	donor6_2.GTAGTTCGAAGGCGAA.1	1.30324e-08	0.0161803	7.21593e-08	0.00257617	1.52895e-08	0.687369	0.0111175	0.214227	4.25694e-08	0.0685299
nodule	donor6_2.GTCCATTACTGCTACG.1	0.00621474	5.27051e-10	1.17978e-09	0.0561395	8.28638e-10	0.646007	0.0618614	0.185377	1.23147e-09	0.0444008
nodule	donor6_2.GTCGTGTCTGGTCATC.1	3.81948e-10	0.0120106	2.13896e-09	0.118475	0.000979479	0.667943	4.62802e-09	0.187506	0.0130852	4.71613e-08
nodule	donor6_2.GTCTTGAGGAGCAGTG.1	0.00721754	2.40472e-08	0.0408775	1.06218e-08	0.0863927	0.588472	9.58477e-08	0.0948228	1.9338e-08	0.182217
nodule	donor6_2.GTGCAGCGTAGAGTAG.1	0.063276	0.00409317	0.00328983	0.0278462	5.00997e-07	0.681747	6.72414e-07	0.219741	4.56944e-06	1.11703e-06
nodule	donor6_2.GTGCCTGAGACCAAAC.1	1.38861e-07	7.4477e-08	1.40542e-07	4.46095e-07	1.75773e-07	0.943714	2.87871e-06	0.0562817	8.81798e-08	5.19097e-07
nodule	donor6_2.GTGTATATCAGCGGGC.1	6.51472e-08	2.41123e-08	4.16733e-07	1.16994e-07	0.0127441	0.834061	0.00872927	0.14002	2.71374e-08	0.00444473
nodule	donor6_2.GTTAACATCACTTAAA.1	3.39998e-08	4.23693e-08	6.86273e-08	8.20178e-08	1.03903e-07	0.990544	0.00442574	0.00231496	4.55239e-08	0.00271509
nodule	donor6_2.GTTCATCGTTTGGCTG.1	8.81941e-08	0.0225895	0.125787	0.0688901	0.061634	0.427865	0.0797521	0.213483	5.06215e-08	3.81469e-08
nodule	donor6_2.GTTGCGCTAACATTAC.1	9.61686e-10	3.08142e-09	0.00599103	0.00218346	0.0701879	0.765115	0.0609075	0.0956153	5.96684e-09	2.84536e-09
nodule	donor6_2.GTTTCATATCGTCGCT.1	1.9751e-07	2.51206e-07	0.142206	0.00966821	0.0220979	0.521889	0.0296861	0.27445	3.76034e-07	7.55425e-07
nodule	donor6_2.TAACCTAGGGAGTCCA.1	4.56982e-08	4.33242e-08	3.82231e-08	0.0273229	8.96476e-08	0.691487	0.0255212	0.255669	3.40584e-08	4.21109e-08
nodule	donor6_2.TAATAGAACAGAGTTA.1	1.80007e-10	0.00590059	4.68776e-10	2.20385e-10	0.0186892	0.757423	0.038875	0.173631	0.00548089	2.95346e-10
nodule	donor6_2.TAATCAACCAAATGGG.1	3.86396e-09	0.0142079	0.0677116	4.4128e-09	9.50557e-09	0.440185	0.0156215	0.424694	1.83505e-09	0.0375798
nodule	donor6_2.TAATTACGTCAGTAGA.1	1.63984e-09	0.0137228	4.07647e-09	1.44598e-09	0.14966	0.767403	1.88644e-08	0.0452209	8.22796e-09	0.023993
nodule	donor6_2.TAATTAGGACATCCGT.1	2.01629e-08	3.1164e-09	0.0115649	0.0422809	6.62997e-09	0.652888	0.123715	0.167751	0.00179971	1.69119e-09
nodule	donor6_2.TACAAGTCTCGTGCAT.1	2.9006e-09	2.26951e-09	8.47382e-08	2.51329e-09	6.61201e-09	0.771249	0.0516908	0.17706	2.16411e-09	3.29948e-09
nodule	donor6_2.TACGTAAAGCGGAGTG.1	7.38207e-10	8.63434e-10	1.65294e-09	1.2121e-09	0.0224534	0.758751	2.22048e-08	0.211906	1.0645e-09	0.00688962
nodule	donor6_2.TACGTACTAGTGCTGA.1	3.10719e-06	0.0288572	7.39597e-07	2.90333e-07	0.027282	0.837295	0.0194846	0.0870762	3.31455e-07	8.98518e-07
nodule	donor6_2.TACTGGACAGCTCGGC.1	5.19724e-09	2.59875e-09	2.62873e-09	0.0220193	0.0122607	0.459452	0.099553	0.391505	1.11944e-09	0.0152106
nodule	donor6_2.TAGATGGTTCCTTACT.1	3.18978e-09	1.56442e-09	6.29017e-09	3.13738e-09	0.0611683	0.714267	0.0918858	0.132679	2.14808e-09	1.63848e-09
nodule	donor6_2.TAGTCTTTCCGAATTG.1	1.13851e-08	3.03619e-08	5.88801e-07	0.0250393	1.89686e-08	0.698498	0.0495949	0.226867	5.69215e-08	3.34505e-08
nodule	donor6_2.TATTCCGAGCTGTTAT.1	0.00548262	1.31722e-09	2.87996e-09	0.0723707	0.0560996	0.625466	0.0357	0.204881	1.61771e-09	3.91586e-09
nodule	donor6_2.TCACAGGAGAATAAGA.1	3.39266e-08	1.0704e-06	5.82031e-07	3.60599e-08	0.185852	0.793204	0.00693904	1.08643e-06	0.0140025	5.72143e-08
nodule	donor6_2.TCAGCCAATCCGTAAA.1	1.67004e-08	0.00559035	3.65921e-08	2.30485e-08	0.0465531	0.717869	0.0542869	0.175701	2.12247e-08	3.30022e-08
nodule	donor6_2.TCCCAAAGCCCTAAAT.1	0.00390431	2.09658e-08	0.0495951	0.0444938	3.11984e-09	0.638329	0.197178	0.0195588	1.26899e-09	0.0469412
nodule	donor6_2.TCCCGTGTGCAATTTG.1	1.71642e-08	0.00964615	0.0476391	0.0207555	4.68939e-08	0.665098	0.0942681	0.162593	2.46937e-08	1.31705e-07
nodule	donor6_2.TCCTAACCGTCGGGCA.1	0.00799875	0.0581083	0.0655252	2.68081e-08	0.0225898	0.523818	0.316355	0.00560505	5.87188e-08	8.88711e-08
nodule	donor6_2.TCGGACGCCCAGCCCA.1	4.20277e-09	4.46341e-09	0.0102718	0.0325021	4.18969e-09	0.924084	2.21135e-07	0.0331419	4.50379e-09	8.75094e-09
nodule	donor6_2.TCTACCCAATAGAGAG.1	3.53532e-07	0.11484	6.07902e-07	2.86116e-07	3.46107e-07	0.485039	0.0328194	0.17128	0.153851	0.0421687
nodule	donor6_2.TCTGAAGCACGTGGTC.1	1.5396e-08	0.0010283	3.31578e-07	0.030738	2.95184e-08	0.62971	0.0643703	0.274152	2.4676e-08	1.64259e-06
nodule	donor6_2.TCTTTAGCAGGCGAAC.1	6.38271e-09	3.7029e-08	1.18827e-07	0.0624823	6.25495e-09	0.848817	1.84179e-08	0.0887009	7.65881e-09	3.54123e-08
nodule	donor6_2.TGAGCCATACAGTCTC.1	5.35607e-08	9.42017e-08	1.21123e-07	1.02801e-07	8.84607e-08	0.883247	0.0111586	0.105593	7.28613e-08	1.78456e-07
nodule	donor6_2.TGCCTAATTGAAGATT.1	0.0527869	0.00702417	7.91361e-07	0.0278658	9.34325e-10	0.551814	0.0762208	0.195393	6.85708e-10	0.088895
nodule	donor6_2.TGCGACACCCTAGTGC.1	2.78443e-07	1.54018e-07	3.25412e-07	0.0444273	1.55669e-07	0.638674	0.138483	0.178415	1.94851e-07	2.34652e-07
nodule	donor6_2.TGCGCCGTTAATAACG.1	0.0160238	7.3451e-07	1.38217e-06	4.63286e-07	0.0804514	0.676254	0.0587567	0.139656	2.31444e-07	0.0288551
nodule	donor6_2.TGCTCCACAGTTCTTA.1	0.0126066	0.0278879	0.0448621	0.00366638	7.45634e-08	0.614027	0.244391	0.0525588	4.7833e-08	2.24674e-07
nodule	donor6_2.TGGGCAGGCCACCGCA.1	1.21585e-06	0.00516787	2.38763e-06	0.0473831	0.0294374	0.64313	7.12072e-05	0.2748	8.37819e-07	6.79047e-06
nodule	donor6_2.TGTATGGCGCAGACAG.1	1.73564e-08	0.0370486	0.150681	3.00154e-08	0.0249847	0.563626	0.0449055	0.175723	0.00303154	2.45584e-08
nodule	donor6_2.TGTCCACGGCTCAACT.1	6.55872e-09	6.01897e-09	7.06316e-09	0.0121937	4.9111e-09	0.875544	3.5995e-08	0.108711	0.00355109	9.53483e-09
nodule	donor6_2.TGTTCCGCTTCCATGA.1	1.70454e-07	5.99246e-05	2.19791e-08	7.38006e-09	3.84099e-08	0.93243	1.0908e-07	0.06751	1.61692e-08	1.628e-08
nodule	donor6_2.TTACGGATGGTTCGAG.1	2.85749e-08	7.26117e-08	6.47595e-08	0.00179027	0.0195879	0.880269	0.0131299	0.0822459	2.03647e-08	0.00297653
nodule	donor6_2.TTCAGCTGGCGTGCCC.1	2.01993e-08	1.48554e-08	5.16752e-08	0.0324342	0.0215449	0.767798	8.38988e-08	0.169649	1.29171e-08	0.00857336
nodule	donor6_2.TTCCGGTTACCCACTT.1	3.36238e-09	0.00325862	0.0261198	0.0847366	9.13083e-09	0.59287	0.0559142	0.237101	7.65592e-09	8.67371e-09
nodule	donor6_2.TTCTGCTAGACTCCAA.1	2.13497e-07	8.47593e-08	1.69224e-07	0.0524562	0.0067377	0.647631	0.148884	0.144291	1.04561e-07	1.17194e-07
nodule	donor6_2.TTGACATGAACGTGGA.1	2.88193e-10	0.0533008	1.78872e-09	0.00632637	4.18054e-10	0.376063	0.176418	0.387892	7.09848e-10	6.56594e-09
nodule	donor6_2.TTGCATGCTGATCACG.1	2.4182e-08	0.0205964	8.60249e-08	8.06491e-08	7.42079e-08	0.843585	0.01737	0.118448	4.1536e-08	5.44701e-08
nodule	donor6_2.TTGGTTCGCTCAAAGG.1	1.09264e-07	4.64548e-08	0.190109	0.0182015	3.21482e-08	0.791689	1.0904e-07	2.876e-07	1.07657e-07	4.15608e-08
nodule	donor6_3.AAACATTTCCCGGATT.1	2.6336e-07	0.0097689	0.0972991	9.46982e-08	0.169883	0.703037	3.76583e-07	0.020009	2.31318e-07	1.89863e-06
nodule	donor6_3.AAAGGGCAGCTTGAAT.1	1.00833e-07	4.21505e-09	7.85975e-05	3.96221e-09	6.76481e-09	0.415214	0.140299	0.444407	6.09173e-09	8.57394e-09
nodule	donor6_3.AAATGGTCAATGTGCC.1	1.18046e-06	1.43048e-06	2.44904e-05	5.16073e-07	1.08118e-06	0.556941	0.0302967	0.365817	0.0469154	9.74379e-07
nodule	donor6_3.AACATATCAACTGGTG.1	0.00834422	1.37217e-09	0.00759889	0.00429936	0.0376505	0.839952	0.0815576	0.00573746	1.35408e-09	0.0148603
nodule	donor6_3.AACCGCTAAGGGATGC.1	4.19288e-09	0.0733495	0.0745452	4.23955e-10	1.89559e-10	0.834369	2.75842e-10	6.78871e-10	0.0177363	5.56047e-10
nodule	donor6_3.AACGTGCGAAAGTCTC.1	8.54222e-08	0.00082194	0.0913558	1.64566e-08	1.4694e-08	0.790298	3.38917e-08	0.10709	0.000306358	0.0101278
nodule	donor6_3.AAGAGCTCTTTATCGG.1	2.73872e-09	1.85886e-08	0.099923	0.0213915	0.0215508	0.632374	0.0263955	0.156315	0.0420508	7.72555e-09
nodule	donor6_3.AAGAGGATGTACGCGA.1	5.97794e-08	0.00616249	0.0890865	1.43465e-07	2.94344e-07	0.410129	0.220391	0.27423	1.90503e-08	1.20837e-07
nodule	donor6_3.AAGATGGCACCGGACC.1	3.10311e-07	2.10406e-07	5.08129e-07	1.97979e-07	0.0113653	0.97635	4.16369e-06	0.0122789	2.08548e-07	5.10537e-07
nodule	donor6_3.AAGCCGAAGCGGTTTA.1	6.62347e-08	1.28198e-08	1.98662e-08	0.0324457	1.59469e-08	0.877481	8.6301e-08	0.0854227	1.94561e-08	0.00465015
nodule	donor6_3.AAGGAGCGGTTGGTGC.1	1.76248e-07	5.6089e-08	1.3022e-07	0.00868974	4.80694e-08	0.991309	2.23416e-07	3.89649e-07	7.64678e-08	2.36467e-07
nodule	donor6_3.AAGTCAATTGTCGTCA.1	0.000664173	4.36154e-08	0.02562	0.057613	3.37482e-08	0.731421	0.0899811	0.0838558	0.0108451	1.94602e-07
nodule	donor6_3.AAGTGCCTTGACTGTA.1	6.38563e-09	5.34479e-09	9.3537e-09	0.0191087	0.00794146	0.744515	0.159166	0.0484339	1.95492e-09	0.0208347
nodule	donor6_3.AAGTTCACTCCAAGCT.1	1.18202e-05	3.66799e-06	8.55814e-06	0.0307418	3.70319e-06	0.557323	1.26482e-05	0.411864	3.16515e-06	2.81237e-05
nodule	donor6_3.AAGTTCAGTCTGCGTA.1	1.07974e-09	0.0090505	0.00419609	0.00619171	8.89208e-10	0.911927	0.0051007	0.029025	0.0110402	0.0234684
nodule	donor6_3.AATAACAACGCTCGGC.1	4.64753e-09	0.0119553	0.0473514	3.57143e-09	2.36083e-08	0.426463	0.115871	0.366472	0.0318873	1.9408e-07
nodule	donor6_3.AATCGTGAGCCGAGCA.1	0.00244123	0.00569546	2.12874e-08	1.34281e-07	1.32398e-08	0.951701	6.34658e-08	0.0401615	2.7401e-08	2.6102e-08
nodule	donor6_3.AATTCCAAGCATGTAC.1	4.3311e-10	3.16559e-10	8.12152e-10	0.00929522	6.52027e-10	0.942743	0.0407419	0.00721945	4.58848e-10	1.03189e-09
nodule	donor6_3.ACAAGGATGCTTTAGG.1	0.000158314	1.28552e-08	5.79161e-08	0.00075129	4.9236e-08	0.832892	0.0433154	0.122882	1.82972e-08	1.19646e-07
nodule	donor6_3.ACCAGTGCGGGAGACG.1	1.98847e-08	2.90651e-08	0.0382937	0.026004	3.58025e-08	0.770681	0.0198192	0.145202	5.92493e-08	4.44577e-08
nodule	donor6_3.ACGCAATCACTACAGC.1	1.67103e-07	3.5528e-07	0.265763	0.150941	7.96482e-08	0.531724	2.16162e-06	0.0515689	1.14692e-07	1.39416e-07
nodule	donor6_3.ACGGAGCGCAAATTAC.1	4.01204e-09	6.8054e-09	0.0159325	0.00726785	4.07048e-09	0.914155	8.16025e-09	7.48191e-09	3.78277e-08	0.0626447
nodule	donor6_3.ACGTTCGCAATCAATT.1	0.00465858	2.14619e-09	2.56571e-09	6.36936e-08	1.14069e-09	0.902174	0.000306231	0.0924634	8.96436e-10	0.000397935
nodule	donor6_3.ACTCAATAAAGGCACG.1	4.04631e-08	5.43564e-08	7.85059e-08	0.0429525	2.14885e-08	0.885393	1.59706e-07	0.071654	2.76647e-08	7.09032e-08
nodule	donor6_3.ACTGAATGGCGAAAGT.1	0.00632247	4.24511e-09	1.79274e-09	2.68711e-09	7.31235e-10	0.857475	0.00397188	0.132231	3.07684e-09	1.65825e-09
nodule	donor6_3.ACTGTCCAGGATTATA.1	4.51347e-08	0.0206843	1.76349e-08	0.0127009	2.20439e-08	0.871275	0.0139846	0.081355	2.67974e-08	3.07869e-08
nodule	donor6_3.ACTTTGTCGACGCACT.1	2.07696e-09	1.10497e-09	2.19453e-09	5.8854e-10	7.10673e-10	0.875476	0.0430213	0.0815024	8.30974e-09	1.48132e-09
nodule	donor6_3.AGACGAAGTGCCGGTC.1	1.73683e-07	3.42772e-07	8.02845e-07	4.17913e-07	6.69573e-07	0.719452	0.115004	0.156884	3.52681e-07	0.00865655
nodule	donor6_3.AGAGTAAACTTCACTA.1	1.17525e-07	0.154913	5.64805e-07	0.00807782	0.084252	0.705882	2.63247e-07	1.29473e-06	1.05054e-06	0.0468717
nodule	donor6_3.AGATACTCAAGATCGA.1	0.0101512	4.99313e-08	0.154995	0.0212143	1.23407e-08	0.578097	0.0817315	0.153811	1.38027e-08	2.10019e-07
nodule	donor6_3.AGATTATAGGACGTTT.1	2.67487e-07	1.15862e-07	4.94917e-07	0.0136987	7.46118e-08	0.888508	2.05215e-07	0.0977922	9.2049e-08	2.78427e-07
nodule	donor6_3.AGCCAAGCTTTGTGTC.1	0.00941635	0.00800508	5.82973e-08	2.73368e-08	3.78136e-08	0.934616	1.81564e-07	0.0479617	3.71894e-07	7.19373e-08
nodule	donor6_3.AGCCCTTGGACATCCC.1	1.04892e-09	4.8888e-10	8.65058e-10	4.08748e-10	5.04442e-10	0.952826	0.0266136	0.02056	4.45438e-10	7.67564e-10
nodule	donor6_3.AGCGGACACTTCGTAG.1	1.85897e-09	4.07708e-10	1.04982e-09	0.00203682	0.0147467	0.951808	5.04433e-09	0.0314087	6.71757e-10	2.11232e-09
nodule	donor6_3.AGCTCTTTACTCAGTT.1	0.0169747	6.05599e-10	1.6531e-09	0.0087263	4.32398e-09	0.721355	0.0540496	0.195598	1.76835e-08	0.00329595
nodule	donor6_3.AGGTTACACCATGCCG.1	3.85607e-07	1.51905e-07	8.4136e-07	0.0290667	1.25241e-07	0.496557	0.125587	0.319715	2.93474e-07	0.0290733
nodule	donor6_3.AGGTTGAGGCACGCTT.1	3.18119e-10	1.12216e-10	2.81623e-10	0.022054	0.00178348	0.901182	0.00473432	0.0702463	1.10992e-10	5.3873e-10
nodule	donor6_3.AGTACATCATTTATCA.1	9.24737e-08	1.09923e-07	1.83355e-07	0.00962751	5.59151e-08	0.946867	0.0435041	2.89932e-07	1.24054e-07	4.39649e-07
nodule	donor6_3.AGTCCCGCCTTTAATT.1	0.0117928	3.12229e-10	5.87368e-10	0.00936598	1.11372e-09	0.965853	7.67066e-10	0.0129878	3.51572e-10	1.54699e-07
nodule	donor6_3.AGTTGACGGTCCTTGC.1	0.00503504	2.65373e-08	5.98908e-08	0.0135248	2.83665e-08	0.8321	9.31268e-07	0.149339	3.48493e-08	1.16793e-07
nodule	donor6_3.ATAATAGCTGTTGAAT.1	1.89044e-10	1.41265e-10	4.58201e-10	7.86925e-11	1.12757e-10	0.982907	0.0170933	4.69113e-10	2.12269e-10	1.54179e-10
nodule	donor6_3.ATACGAAGGCTTTCCA.1	0.00299121	0.0156928	1.49377e-07	1.05047e-08	8.57603e-09	0.927628	0.0286692	1.83106e-08	0.0250189	2.55592e-08
nodule	donor6_3.ATCAAACACTGTTCCA.1	2.62898e-09	2.74424e-09	4.07244e-09	0.00334192	0.00362438	0.989164	4.9216e-09	6.96209e-09	3.26308e-09	0.00386922
nodule	donor6_3.ATCAGCCTCATGCTGC.1	0.0393037	4.36896e-09	2.93462e-07	5.36568e-09	1.08331e-08	0.794063	0.111301	0.0553327	2.02099e-08	5.26178e-08
nodule	donor6_3.ATCGCTTTACGTCTCA.1	2.90614e-07	0.0486923	0.319582	1.79866e-06	3.4526e-07	0.576826	4.00562e-07	0.00776128	0.00441643	0.0427188
nodule	donor6_3.ATCTGGTTAAGACTGT.1	3.49005e-09	1.09326e-09	0.0741656	0.067737	1.62968e-09	0.806583	1.1828e-08	0.0515148	2.17664e-09	5.06923e-09
nodule	donor6_3.ATCTTGACCTGCAACG.1	2.69653e-08	1.16893e-08	2.58001e-07	1.74594e-08	5.49301e-09	0.898957	0.00977171	0.0912711	5.41167e-09	1.24228e-08
nodule	donor6_3.ATCTTGACTTGTCCAA.1	0.00900042	1.95569e-07	2.4826e-07	0.0318511	0.00295196	0.798259	3.46125e-07	0.121808	2.17259e-07	0.0361291
nodule	donor6_3.ATGCGACAGTCCCATT.1	0.00316968	7.21003e-10	0.16041	1.60135e-09	0.0850238	0.342725	0.0766993	0.299567	8.50379e-10	0.0324056
nodule	donor6_3.ATGGCGGAATAGTCGC.1	1.39696e-09	3.13774e-09	0.0777873	8.57752e-09	3.16785e-09	0.693079	0.114865	0.114269	2.43252e-09	3.71064e-09
nodule	donor6_3.ATTAGGCGATGCTTTC.1	1.46336e-08	1.39838e-08	0.0218899	1.36793e-08	3.85672e-08	0.950552	0.0275581	1.47863e-07	2.90885e-08	3.77111e-08
nodule	donor6_3.ATTATTCAGAGTCACT.1	1.45807e-07	0.00996887	1.09151e-05	0.0446629	0.0725584	0.465116	0.0682573	0.339425	2.24034e-07	4.69451e-07
nodule	donor6_3.ATTCAGTAGCAGGGTC.1	1.70275e-09	1.04684e-09	7.9569e-09	5.62534e-10	9.65087e-10	0.514444	0.0996185	0.364504	0.021434	2.09945e-09
nodule	donor6_3.CAACACATCTCCTGCC.1	1.57492e-07	4.35894e-08	1.8752e-07	0.0772554	7.50663e-08	0.80802	0.016791	0.0979312	1.0818e-07	1.32276e-06
nodule	donor6_3.CAAGCAACGTCGGAGT.1	0.00676402	3.83988e-10	1.13395e-09	7.01308e-10	4.37248e-10	0.781474	0.0496674	0.162095	7.97133e-10	1.5361e-09
nodule	donor6_3.CAAGGTCCTATAGGCT.1	1.6873e-07	0.0395458	0.131838	0.064048	2.6961e-08	0.497293	0.0152554	0.252019	6.11907e-08	1.22688e-07
nodule	donor6_3.CAATAAACCTTGGCCC.1	0.0111444	0.0225502	0.0767847	0.00595505	8.12234e-08	0.863876	1.44474e-07	0.0196891	1.59429e-07	1.69219e-07
nodule	donor6_3.CAATCCCTATACCAGC.1	0.0134515	0.14497	0.25461	0.146235	5.55195e-10	0.3746	7.05129e-10	1.56674e-09	0.0122812	0.0538524
nodule	donor6_3.CAATGAGGTTCGACTA.1	0.000807363	1.67892e-07	0.0106131	0.0548792	8.87848e-06	0.597316	0.214969	0.121404	3.04808e-07	2.13849e-06
nodule	donor6_3.CACTGACGATTGTGGA.1	4.37146e-08	2.18391e-08	3.34281e-08	0.0270091	1.05431e-07	0.882808	1.08471e-07	0.0901823	2.40973e-08	1.12531e-07
nodule	donor6_3.CAGTCTGTATACTGGG.1	0.0200922	0.0260004	5.39196e-08	6.99053e-09	0.0326277	0.921279	5.75125e-08	4.5636e-07	8.32063e-09	9.8354e-09
nodule	donor6_3.CATGACTTCGCTGAAT.1	0.015768	0.0213091	4.27148e-07	0.127727	0.00428681	0.524575	0.158186	0.0699752	0.0781722	8.76071e-08
nodule	donor6_3.CCACAATGTACGTCTT.1	0.0148221	7.37934e-08	0.0584213	0.0819116	5.89224e-08	0.816351	5.45034e-07	0.0284931	5.00098e-08	1.24214e-07
nodule	donor6_3.CCACGAATTTAACCTC.1	2.67044e-07	2.38953e-07	0.244705	0.0163892	0.021245	0.47707	0.133136	0.0940658	5.45919e-07	0.0133881
nodule	donor6_3.CCACTATCCGGGTCAC.1	6.31034e-08	6.89741e-08	0.0372847	0.000163857	0.0315337	0.710534	2.74595e-07	0.141536	1.52232e-08	0.078947
nodule	donor6_3.CCAGCTCGAACGCATT.1	0.00847876	5.65483e-08	6.12631e-08	9.14124e-08	0.000871939	0.984539	0.0061096	7.62179e-07	3.87019e-08	1.08837e-07
nodule	donor6_3.CCATGCCTGTTTAGTA.1	4.19737e-09	0.00107091	1.19932e-08	0.041504	3.26172e-09	0.820479	6.56683e-09	0.136946	2.092e-08	1.56061e-08
nodule	donor6_3.CCGCCGTTGAGGATAA.1	1.49808e-09	2.52226e-09	8.32393e-08	1.86782e-09	0.0234355	0.770579	0.168602	4.23261e-08	2.0042e-09	0.0373833
nodule	donor6_3.CCGCTTGCTGACATGG.1	8.68866e-09	0.095311	1.52825e-08	0.0490327	1.15331e-08	0.769952	4.76588e-08	0.0800672	0.00563738	1.1227e-08
nodule	donor6_3.CCTACTGCTTACACTT.1	0.00375384	5.82175e-08	2.33518e-07	1.5309e-07	1.38141e-07	0.891598	2.11147e-06	0.104645	9.42192e-08	1.38298e-07
nodule	donor6_3.CCTATGTCCACTCCAC.1	0.00308315	0.000416444	5.66762e-07	7.29895e-08	0.013303	0.664924	0.0110365	0.307235	1.17866e-06	7.55395e-08
nodule	donor6_3.CCTCCGACAATTCAAG.1	2.16381e-07	0.00779838	0.076576	0.00625707	2.19211e-07	0.600818	0.218001	0.0849775	0.00557114	3.67231e-07
nodule	donor6_3.CCTCCTGTTGTGTCGT.1	1.66514e-08	7.65595e-09	0.0301749	7.79342e-09	0.0316669	0.605748	0.100549	0.157613	0.0407556	0.0334925
nodule	donor6_3.CCTGGCTAGACCCGCC.1	3.1674e-08	3.01692e-08	0.0758437	0.150151	3.02118e-08	0.662296	0.00180852	0.0919506	0.0179492	4.56768e-07
nodule	donor6_3.CCTTTAAGGGAGCACT.1	0.00844164	2.86448e-08	1.29106e-07	0.0143957	0.00563032	0.90414	5.33509e-07	0.0643179	1.06132e-07	0.00307414
nodule	donor6_3.CGAAACGCAATTCATG.1	7.85797e-10	1.60667e-09	4.04615e-09	3.68815e-10	6.99142e-10	0.932952	0.0520717	0.0149768	7.87713e-10	2.31219e-09
nodule	donor6_3.CGACAATTTGATCTAA.1	1.14301e-08	6.27354e-09	1.29833e-08	1.19763e-08	1.39744e-08	0.933268	0.0154711	0.0512607	5.5176e-09	1.17191e-08
nodule	donor6_3.CGACACGCTCCGACAG.1	7.32789e-10	4.26919e-10	0.0292282	3.66846e-10	2.12486e-10	0.657088	0.117269	0.196414	8.60382e-10	7.42225e-10
nodule	donor6_3.CGCAAACACGAGTTAC.1	5.98656e-08	3.64075e-08	6.67612e-08	0.00558387	2.73806e-08	0.911675	2.36064e-07	0.0827404	2.81236e-08	8.09032e-08
nodule	donor6_3.CGCATCCATCAGCCAG.1	3.81229e-08	0.0113916	0.16495	0.109939	6.76289e-08	0.502162	0.00221309	0.209344	4.45478e-08	1.55609e-07
nodule	donor6_3.CGCATGGTGCGATGCT.1	1.52942e-09	6.652e-10	3.91854e-09	1.73795e-09	1.00819e-09	0.821365	0.0537426	0.122092	0.00280012	2.53748e-09
nodule	donor6_3.CGCGCATGTTTGATTG.1	3.57207e-08	3.6246e-09	2.58039e-08	4.02928e-09	3.49349e-09	1	6.94245e-09	2.60463e-08	4.00459e-09	4.19538e-08
nodule	donor6_3.CGCTATTCTTAGGCTC.1	7.29084e-10	1.21064e-09	1.3483e-09	0.00689144	1.99064e-09	0.903451	0.0364455	0.0532126	1.27365e-09	7.57365e-09
nodule	donor6_3.CGGAGTTTGAGAGACA.1	7.92234e-09	8.98253e-08	0.110905	1.40532e-09	2.82991e-09	0.719617	0.142623	0.0268552	1.74712e-08	4.14413e-09
nodule	donor6_3.CGTGCAGACTGGGACA.1	2.9183e-09	0.196378	0.0697981	2.42006e-08	4.605e-09	0.484858	0.193272	0.0556933	2.60202e-09	5.57303e-09
nodule	donor6_3.CGTTTCACTTCGGGCG.1	1.3961e-08	1.80162e-08	2.32556e-08	0.00221239	1.41839e-08	0.968316	4.40673e-08	0.0294717	1.71847e-08	4.4084e-08
nodule	donor6_3.CTAAAGGATGAGATAC.1	3.16772e-09	0.0983335	0.0488861	9.81582e-10	0.00687784	0.67489	4.96738e-09	0.150238	0.00797967	0.0127942
nodule	donor6_3.CTAGTTGGGCCCGGTA.1	2.82898e-07	0.0150013	0.0899196	0.00109691	1.00214e-07	0.740955	0.0186433	0.134383	8.3789e-08	2.59732e-07
nodule	donor6_3.CTATAAGAGCCAATCG.1	1.58384e-09	0.0159002	2.87188e-09	2.18991e-09	1.29177e-08	0.923434	0.00381802	0.0568475	1.56471e-09	1.78122e-09
nodule	donor6_3.CTCCGCCCACATGAGG.1	0.0616382	0.00112583	0.168126	0.00940547	5.56619e-07	0.454627	0.163242	0.0853308	0.0286042	0.0278995
nodule	donor6_3.CTGCCTCATATGCAAC.1	7.15242e-10	8.35292e-10	1.6494e-09	0.035078	1.18592e-09	0.66779	1.75398e-08	0.297132	1.07223e-09	1.0456e-09
nodule	donor6_3.CTGCTTTATGTCCGCG.1	0.0137551	1.39887e-09	8.21598e-09	0.024108	0.00102819	0.948333	0.00172865	3.45282e-09	0.0110466	8.53956e-09
nodule	donor6_3.CTGGGATACGCTACCC.1	7.62403e-09	6.51873e-08	4.51074e-08	0.00965823	7.93789e-09	0.82576	0.100085	0.0605768	0.00392009	1.25929e-08
nodule	donor6_3.CTGGTAACACATAGAA.1	1.03429e-08	1.95595e-08	7.22363e-08	6.17967e-09	8.61165e-09	0.850557	0.0127335	0.136709	5.81547e-09	8.05399e-09
nodule	donor6_3.CTTATAGATGGCTGTT.1	8.50541e-07	1.60034e-07	2.99649e-07	1.05693e-07	0.0420878	0.658794	0.156314	0.142802	2.54149e-07	4.97566e-07
nodule	donor6_3.CTTGGCCAAGCTGGGA.1	0.00141006	1.4263e-07	2.14267e-07	0.01697	1.04482e-07	0.771037	5.01611e-07	0.210582	1.05348e-07	2.72153e-07
nodule	donor6_3.CTTTAGGAACACTGTT.1	3.56084e-08	0.0230398	3.13218e-07	4.20664e-08	0.0414579	0.775921	0.0359068	0.123674	2.4091e-08	5.98289e-08
nodule	donor6_3.CTTTAGTGCTATTATT.1	1.46069e-09	0.00129239	2.77786e-09	5.74123e-10	1.84255e-09	0.891498	0.0710767	2.24971e-09	1.49715e-08	0.0361329
nodule	donor6_3.CTTTATCCGACGCATG.1	3.12057e-07	0.0115208	7.47781e-08	8.50004e-08	4.94905e-08	0.823223	1.80695e-07	0.165256	7.05351e-08	5.33754e-08
nodule	donor6_3.CTTTGGCTTTAGTAAA.1	0.00658074	2.8982e-08	0.0450731	0.000964097	3.88882e-06	0.867041	0.0664048	0.0139323	5.45068e-08	3.92396e-08
nodule	donor6_3.GAAGTTTCCACTCAAT.1	0.0411916	4.4891e-07	7.31836e-07	1.47046e-07	8.28e-07	0.911128	0.00521419	1.32529e-06	0.0360974	0.00636556
nodule	donor6_3.GAATCTGAACATTCTC.1	2.52492e-08	0.0317625	0.00710516	4.84419e-09	0.0163232	0.914997	0.0267301	1.69198e-08	0.00308162	5.71385e-09
nodule	donor6_3.GACCGACGTGAAAGCA.1	1.82845e-08	0.119022	5.92036e-08	0.0188609	0.0430732	0.749374	6.2162e-08	0.0149356	0.0547345	5.2971e-08
nodule	donor6_3.GACGGTCCTAGGGTGT.1	5.37841e-10	3.95503e-10	5.96744e-10	5.09472e-10	5.19434e-10	1	1.94734e-09	2.32051e-08	5.79516e-10	5.7014e-10
nodule	donor6_3.GACTGCACCAGCCCAG.1	0.00672188	0.00366548	0.130524	0.0218486	0.0337097	0.598737	0.0814274	0.111696	0.0116694	9.1241e-08
nodule	donor6_3.GAGAGGGCGCGAGGTT.1	1.27314e-08	4.79031e-09	1.04605e-08	2.08228e-08	9.94681e-09	0.858754	3.50819e-08	0.141246	4.51673e-09	3.82305e-08
nodule	donor6_3.GAGCGCAAATACTCCG.1	5.44377e-08	1.55722e-06	0.0289172	0.0127838	0.219412	0.549298	0.076097	0.109622	5.88532e-08	0.00386875
nodule	donor6_3.GAGGAATGGAGAGGTT.1	1.47434e-08	0.00843529	3.98866e-08	1.1383e-08	0.143858	0.669008	0.130845	0.047854	2.29438e-08	3.60592e-08
nodule	donor6_3.GAGTATCAAAGTTACA.1	0.0181984	1.34962e-07	2.04609e-06	0.0107109	0.00528557	0.749676	0.0563821	0.159744	4.02674e-07	5.38767e-07
nodule	donor6_3.GAGTGTGCGGTACCCA.1	4.11107e-08	0.00350317	3.93585e-07	1.54896e-08	0.0409845	0.901531	4.81899e-08	0.0539804	6.47293e-08	2.69956e-08
nodule	donor6_3.GATCGGTGGCCATAAC.1	3.02094e-07	0.0259438	1.08443e-07	1.68884e-08	8.98545e-09	0.651846	1.3136e-07	0.299039	0.0231705	1.61979e-08
nodule	donor6_3.GCAGGTAGAGTATGGT.1	6.25132e-09	4.95099e-09	0.00014327	0.052777	4.95114e-09	0.936297	3.94857e-08	0.0107827	5.9993e-09	1.3973e-08
nodule	donor6_3.GCCGCTTGTGAGAAAC.1	1.20216e-07	7.58114e-08	0.0578855	1.14982e-07	1.54871e-07	0.853019	0.0611936	0.0233057	0.00459551	3.8231e-07
nodule	donor6_3.GCCTACGTTCTGTGCA.1	4.07409e-10	4.19245e-10	6.61742e-10	4.98902e-10	3.88035e-10	0.902367	0.025653	0.0719795	4.00119e-10	1.02979e-09
nodule	donor6_3.GCGGGCATTACGATGC.1	2.91802e-10	6.61199e-05	9.09562e-10	0.11435	0.0117109	0.700789	8.09843e-10	0.173084	4.69073e-10	5.25411e-10
nodule	donor6_3.GCGGTCTTGCTTTCAC.1	2.29629e-07	8.00123e-08	1.45537e-07	1.0705e-08	2.76046e-08	0.945997	0.00215339	0.0518493	1.22367e-07	6.08373e-08
nodule	donor6_3.GCGTCTCTGCATTGGG.1	1.38947e-09	1.6632e-09	4.71832e-08	1.30955e-09	2.82485e-09	0.742552	0.129388	0.118209	0.00985044	1.08587e-09
nodule	donor6_3.GCTCCATGAGTGCAGA.1	0.00376766	6.51018e-08	1.15581e-07	4.8474e-08	9.2537e-08	0.864119	2.38657e-07	0.132112	9.04702e-08	2.8165e-07
nodule	donor6_3.GCTGTATTACTGGCCC.1	3.85333e-09	0.0433846	0.0303415	1.58208e-09	3.68032e-09	0.730331	0.0391922	0.0562112	0.100539	2.18284e-09
nodule	donor6_3.GGACTCTTCCGGTTGA.1	1.21916e-07	0.198908	1.00444e-06	3.06452e-08	7.66473e-08	0.601359	0.0878789	0.0151461	5.18407e-08	0.0967061
nodule	donor6_3.GGAGGCCGAAGTCGTC.1	4.47205e-08	2.02931e-08	8.13406e-08	0.00417573	0.00344803	0.941442	0.0509337	6.37069e-08	2.85543e-08	2.05545e-07
nodule	donor6_3.GGATCCGGAATATACT.1	3.57976e-08	4.39697e-10	0.126168	0.0333975	5.59299e-10	0.550343	0.123975	0.166116	7.35762e-10	7.92551e-10
nodule	donor6_3.GGATGTCCTTACCGCA.1	8.81872e-09	0.0164528	2.46194e-08	4.2897e-09	0.0795973	0.903949	1.75428e-08	8.29211e-07	8.17938e-09	6.21832e-09
nodule	donor6_3.GGATTTCACTTCTATA.1	1.23888e-09	0.125288	0.0455794	0.0170941	1.51251e-09	0.607194	1.66819e-09	0.0514025	0.14525	0.0081921
nodule	donor6_3.GGCAAGCCCATAGTGG.1	1.46671e-08	9.39441e-09	2.39578e-08	9.25805e-09	1.36309e-08	0.938551	0.00717333	0.0507739	1.57289e-08	0.00350157
nodule	donor6_3.GGCACTCAGCCGACCC.1	4.61796e-07	9.0066e-08	1.73839e-07	4.01762e-08	2.27943e-07	0.729787	2.18542e-07	0.270211	4.2549e-07	2.06655e-07
nodule	donor6_3.GGCCCAGCTGGTTTGC.1	0.000344377	7.21094e-07	1.21671e-06	1.45834e-06	1.32832e-06	0.919068	0.0024889	0.0780902	8.64733e-07	3.1174e-06
nodule	donor6_3.GGCGTCCTATCCGCTG.1	1.84238e-06	0.000345172	0.0158953	3.09762e-06	2.17106e-06	0.653757	0.145512	0.184061	0.000421518	1.71869e-06
nodule	donor6_3.GGGATTTACCGCACCT.1	0.00158853	6.21599e-09	1.08879e-08	0.0259808	4.24229e-09	0.73773	1.12083e-08	0.234701	5.63239e-09	2.1157e-08
nodule	donor6_3.GGTACACCAGATTTAT.1	0.00533858	0.00133725	1.13906e-08	0.0491463	2.95694e-09	0.768447	1.33e-08	0.175731	4.96048e-08	4.79863e-08
nodule	donor6_3.GGTCTGAGAATCTGGA.1	2.13129e-07	9.4813e-08	0.151307	0.0272875	9.45479e-08	0.727546	0.00590449	0.0800079	1.8847e-07	0.00794633
nodule	donor6_3.GGTTTCAATCGGTCAG.1	3.01689e-08	7.43634e-08	0.113928	0.0619776	4.37131e-08	0.750853	2.51754e-08	0.0732414	3.20533e-08	3.6943e-07
nodule	donor6_3.GTACAGAGGCAAGGGT.1	4.12128e-08	1.42477e-08	0.0265682	0.0148154	1.05711e-08	0.791706	0.126188	0.0407224	3.14138e-08	2.17332e-08
nodule	donor6_3.GTACTGGAGTTAGACC.1	7.75896e-08	1.74885e-07	0.258017	7.4889e-07	1.65361e-07	0.348208	0.0870648	0.306708	2.05923e-07	1.95231e-07
nodule	donor6_3.GTCGTCTGGTTGGCTA.1	3.28439e-08	0.05462	1.70232e-07	0.0100925	1.09695e-07	0.663435	0.0232192	0.138924	0.00964529	0.100064
nodule	donor6_3.GTCTATCTGAGTTTCT.1	1.26852e-08	0.0429437	1.33619e-08	3.54489e-09	3.64362e-09	0.758043	7.29172e-09	0.191059	0.00795483	8.40553e-09
nodule	donor6_3.GTGAAGCCGTATAGTC.1	0.0104685	2.06563e-07	0.034113	0.102653	2.51682e-07	0.662369	0.0126522	0.177744	3.95798e-07	3.12537e-07
nodule	donor6_3.GTGATCACTAACGCCT.1	7.58754e-09	6.60085e-09	0.0324483	7.30037e-09	0.11318	0.636859	5.839e-08	0.217512	6.65178e-09	6.40162e-09
nodule	donor6_3.GTGGTGGCCAAGTGAA.1	8.49194e-08	0.0736111	0.0552354	0.0500325	1.6127e-07	0.643897	0.073671	0.0877625	0.0157901	7.45248e-08
nodule	donor6_3.GTGTACGAACCGTTCC.1	1.43996e-09	3.85632e-10	1.15106e-09	5.91298e-10	6.2268e-10	0.930252	0.0437273	0.0260212	4.5503e-10	4.77313e-09
nodule	donor6_3.GTTAGCCGTAAATCAA.1	1.33559e-09	6.46853e-10	0.0528306	0.082183	0.00015186	0.717744	0.14709	1.20471e-08	6.57595e-10	1.10816e-09
nodule	donor6_3.GTTCGGATCGGGAACA.1	2.60066e-06	0.278878	1.1222e-05	1.32307e-06	1.10175e-06	0.386582	1.68786e-06	4.96435e-06	0.334515	1.99432e-06
nodule	donor6_3.GTTGAACCGGTTCCAT.1	1.36751e-09	1.81706e-09	0.0252515	0.00546822	7.69274e-10	0.74661	0.0688404	0.12544	1.47918e-09	0.0283897
nodule	donor6_3.GTTTCCTGGAGGGTGA.1	1.48452e-07	9.88035e-08	1.56307e-07	0.014396	9.77316e-08	0.860336	1.28086e-07	0.125267	1.14472e-07	1.84153e-07
nodule	donor6_3.GTTTGGCCCAAGTTAT.1	5.60988e-09	4.04899e-09	0.0560324	0.00334399	3.629e-09	0.62092	0.0818844	0.23782	1.05248e-08	9.23066e-09
nodule	donor6_3.TAAGGCATAACATCAA.1	2.86507e-08	1.86383e-08	3.45861e-08	1.72795e-08	2.0299e-08	0.914239	6.02434e-08	0.0857605	1.99449e-08	4.59973e-08
nodule	donor6_3.TAATAGAACAGAGTTA.1	3.06195e-09	0.0272325	1.73373e-09	2.42067e-09	4.9738e-09	0.801495	0.114022	0.057251	6.66474e-10	1.50259e-09
nodule	donor6_3.TAATAGTGACGACCAG.1	3.14098e-09	0.0138945	0.0505479	0.0792274	1.01698e-09	0.691181	0.0346542	0.130495	2.00333e-08	4.17273e-09
nodule	donor6_3.TACCGGTCGTTTCCAT.1	2.51912e-09	7.2305e-10	1.36986e-09	4.96172e-10	8.2738e-10	0.618178	0.171787	0.208024	0.00201099	1.0866e-09
nodule	donor6_3.TACGCAGTTCTTTCCT.1	9.41317e-09	5.55902e-09	1.48807e-08	5.89732e-09	1.30467e-08	0.892545	0.0182259	0.0827791	4.59477e-09	0.00644952
nodule	donor6_3.TACGCTCGGTATTGGA.1	0.037564	3.17686e-08	0.0610812	5.0829e-09	0.00755255	0.556329	0.127248	0.138859	0.0532481	0.0181182
nodule	donor6_3.TACGGCATGGACGCTA.1	3.75306e-09	3.76685e-09	8.25234e-09	1.80967e-09	7.06329e-09	0.765909	0.062538	0.113765	0.0447122	0.013075
nodule	donor6_3.TACGTGCAAGGTTCCT.1	0.000293146	0.0709852	0.122446	0.0273531	1.12478e-07	0.631559	3.79888e-08	0.104964	0.00390061	0.0384984
nodule	donor6_3.TAGCCATTTCAAAGTC.1	5.49963e-08	5.92589e-08	2.08704e-07	0.0541139	1.17062e-07	0.347507	0.090465	0.507913	1.15716e-07	3.36151e-07
nodule	donor6_3.TAGCCGGCGGTCAGCG.1	1.75953e-07	9.14526e-08	0.0989528	0.0314598	2.02467e-06	0.492547	0.108038	0.250207	7.47799e-08	0.0187926
nodule	donor6_3.TAGGTTCTGCTGAGAA.1	1.163e-09	3.32013e-09	0.00145863	1.75411e-09	1.2166e-09	0.866408	0.0252617	0.104781	0.00209036	1.12594e-08
nodule	donor6_3.TAGTCGATCACGGGTT.1	2.61566e-08	1.45392e-08	3.12064e-08	2.55542e-08	2.20065e-08	0.741588	0.0356608	0.22275	1.40899e-08	6.08104e-07
nodule	donor6_3.TATCACTTCGAGTAAC.1	1.21419e-08	1.12001e-07	0.0678686	0.00757217	4.19396e-09	0.587717	0.017423	0.31559	4.02098e-08	0.00382935
nodule	donor6_3.TATGGGACCGAGCAGG.1	0.0153076	5.36878e-09	0.105551	1.39099e-08	3.6788e-09	0.781414	0.0519959	0.0334751	1.27298e-08	0.0122562
nodule	donor6_3.TATTTGATTTGCACAG.1	0.0316017	6.84422e-08	1.38248e-07	3.88167e-08	0.0334056	0.584947	0.281372	0.0686721	9.8674e-08	1.14482e-06
nodule	donor6_3.TCAACCATGTTCGGGC.1	5.23499e-09	1.55364e-09	2.39332e-09	3.58998e-08	2.47417e-09	0.982941	3.98203e-09	0.0170588	2.05921e-09	1.41837e-08
nodule	donor6_3.TCAGCAAATGCATCTC.1	2.51183e-08	1.49474e-08	0.155931	0.0293538	2.29977e-08	0.682111	1.46453e-07	0.119816	1.72934e-08	0.0127884
nodule	donor6_3.TCAGCGCACGCCGTTT.1	0.0814272	0.0259261	0.00621696	1.78321e-06	1.2626e-05	0.858316	0.0280971	1.63021e-06	3.0369e-07	5.7555e-07
nodule	donor6_3.TCCAACTTTAAATTCT.1	0.0197973	1.21334e-09	4.39094e-09	8.84336e-09	8.72599e-10	0.810283	0.0486854	0.110901	0.0103333	3.31581e-09
nodule	donor6_3.TCCCAAACAGACAACG.1	1.66762e-07	1.32005e-07	4.91943e-07	0.0164188	0.0380305	0.748913	0.139558	0.0467503	0.0103278	6.77652e-07
nodule	donor6_3.TCCCGTCAGTCCCGCA.1	5.98067e-09	5.11991e-09	9.17502e-09	0.0108477	5.25483e-09	0.902754	0.000622505	0.0857763	4.93431e-09	1.25621e-08
nodule	donor6_3.TCCGATAATTGCCATA.1	3.79465e-08	0.0404271	0.141023	0.110159	3.10889e-08	0.617751	4.95752e-08	0.0906394	5.7962e-08	2.36766e-08
nodule	donor6_3.TCCGATTACATTGCCG.1	0.00560106	1.62255e-09	0.0835138	2.37107e-09	2.40797e-09	0.506424	0.164108	0.196179	4.15726e-09	0.0441749
nodule	donor6_3.TCCTAAAGATTCAGAC.1	4.14839e-08	1.51844e-08	2.36702e-08	3.11967e-08	1.31616e-08	0.838645	0.0534562	0.107898	4.33942e-08	7.54877e-07
nodule	donor6_3.TCCTCTACGAGATGGC.1	3.50326e-08	1.26095e-07	0.0562521	1.2669e-08	0.0744053	0.582752	0.133576	0.11332	0.0396951	2.92567e-08
nodule	donor6_3.TCGAAATTTAGGACCA.1	2.80218e-07	1.65599e-07	0.0124351	1.52186e-07	1.09822e-07	0.83313	4.05237e-07	0.120626	2.97738e-07	0.0338077
nodule	donor6_3.TCGAGACCAACACCGT.1	1.96442e-09	9.83195e-10	7.28107e-09	7.05331e-09	1.15963e-09	0.691376	1.08239e-08	0.296792	1.04232e-09	0.0118319
nodule	donor6_3.TCGCCGAAGTTGCGTC.1	5.43289e-06	0.216809	0.00757572	6.52381e-08	1.84154e-07	0.649967	5.31773e-07	0.104088	0.0186096	0.00294407
nodule	donor6_3.TCGCTCGGCACCAGCG.1	0.0394221	8.568e-08	0.054072	0.0707589	4.14675e-08	0.806182	1.94444e-07	0.0295615	3.41027e-06	1.67756e-07
nodule	donor6_3.TCGTAAGACGACATTG.1	3.54014e-08	0.0103216	0.00109471	0.0226784	0.00622306	0.853032	5.81613e-08	0.0936811	0.0116504	0.00131907
nodule	donor6_3.TCGTACCGACGTCAAG.1	3.77307e-10	0.0301173	0.0237105	0.0236201	5.75305e-10	0.786203	7.6473e-09	0.136349	2.80766e-10	9.69325e-10
nodule	donor6_3.TCTAGTGATATCGTGG.1	6.79045e-09	6.4931e-09	0.0403891	0.0384538	2.4681e-09	0.745504	0.0966111	0.0790419	3.36699e-09	1.93984e-08
nodule	donor6_3.TCTATGCTATAACGAC.1	7.2052e-09	4.15318e-09	0.0961255	4.99789e-09	0.060702	0.622916	0.00918685	0.21107	4.46733e-09	1.43523e-08
nodule	donor6_3.TCTCCCTGGGCAGCGT.1	0.0230748	3.55096e-08	0.124865	0.00769307	2.40868e-08	0.639081	0.0842726	0.117616	0.00339738	4.18979e-07
nodule	donor6_3.TCTGTGCCATCATAGT.1	0.0357537	2.74545e-08	0.19963	0.0220023	0.0166026	0.654747	4.68243e-07	0.0712637	6.22475e-08	1.55461e-07
nodule	donor6_3.TCTTAGAGCTCCAATT.1	0.0176739	9.31478e-08	1.50078e-07	0.0870391	0.0428358	0.414469	0.0498674	0.295198	8.71465e-08	0.0929167
nodule	donor6_3.TGAGAATGCTTTACCG.1	0.0106992	1.21325e-09	0.00496816	6.32653e-10	0.261718	0.611939	2.78899e-09	0.0652611	0.0454144	4.48523e-09
nodule	donor6_3.TGAGAGATTTACCACG.1	0.0116836	0.0499031	0.0538229	0.0398447	8.15874e-08	0.730134	0.0386037	0.0173654	2.76667e-07	0.058642
nodule	donor6_3.TGAGCCATACAGTCTC.1	1.27523e-08	3.69655e-08	0.096955	2.3067e-07	4.21616e-09	0.609588	2.85432e-08	0.260494	9.97559e-09	0.0329632
nodule	donor6_3.TGATCCCAGCATTAGT.1	7.33177e-09	1.12776e-08	5.58622e-09	0.0239919	1.96895e-09	0.933776	1.79094e-09	4.94813e-09	0.000633294	0.0415989
nodule	donor6_3.TGCCGAAAGCGTATTC.1	2.32638e-07	1.48891e-07	0.110558	0.0311989	0.035976	0.709547	8.80364e-07	0.105479	4.26619e-07	0.00723923
nodule	donor6_3.TGCGGAGTAAAGGTGC.1	0.00205145	0.0533652	0.0565425	0.026008	2.71253e-08	0.605061	0.0541755	0.202796	4.87167e-08	2.30409e-07
nodule	donor6_3.TGGAACCACTGACACA.1	8.07104e-09	0.0526216	4.92897e-09	0.0337906	4.7965e-09	0.878931	5.00572e-09	1.91412e-08	0.0346564	2.76902e-08
nodule	donor6_3.TGGAAGAAGGGAACGT.1	4.60368e-07	9.03159e-07	0.0315612	0.00238489	6.8942e-07	0.418206	0.0225565	0.516875	6.77768e-07	0.00841383
nodule	donor6_3.TGGGAAATGCCTTTCC.1	2.14142e-08	5.6726e-08	3.71975e-08	2.38251e-08	8.29446e-08	0.788686	0.151826	0.0594877	2.76421e-08	1.14894e-07
nodule	donor6_3.TGGGCGATACAATAAG.1	1.89391e-09	1.7722e-09	3.56129e-09	1.94354e-09	1.88165e-09	0.827615	1.10239e-08	0.156921	1.84503e-09	0.0154642
nodule	donor6_3.TGTACGAACAAATCCG.1	3.63289e-08	1.71063e-08	3.99602e-08	2.66084e-08	2.06471e-08	0.988113	7.49758e-08	0.0118867	2.54778e-08	2.97252e-08
nodule	donor6_3.TGTAGGAGAAATTTCC.1	9.44083e-10	1.92811e-10	2.78413e-10	0.0116701	1.50951e-10	0.856288	6.59071e-10	0.132041	2.1669e-10	5.28354e-10
nodule	donor6_3.TGTATAACAGATCCTG.1	0.0158585	4.26718e-08	0.0113817	7.22506e-09	4.67628e-09	0.741869	0.0416299	0.189261	5.76064e-09	5.34069e-09
nodule	donor6_3.TGTATGGCGCAGACAG.1	0.00262438	9.22674e-08	5.93822e-08	0.00219308	7.45489e-09	0.882065	1.02759e-07	0.113118	1.05859e-07	2.11889e-08
nodule	donor6_3.TTATGATCTTAACGAA.1	0.00929702	2.11952e-09	0.307022	0.0175921	0.0261591	0.601054	3.77157e-09	0.0388751	1.07734e-09	2.52922e-09
nodule	donor6_3.TTCACGAAAGGATCAC.1	1.68522e-07	0.0264943	1.69528e-08	1.64952e-08	8.3686e-09	0.973504	1.90758e-08	2.59095e-08	6.17354e-07	6.51987e-07
nodule	donor6_3.TTCCGGTATCTGTGTC.1	1.31861e-07	1.59576e-06	0.182834	0.02614	0.0858828	0.637347	0.0159688	0.0518258	8.53906e-08	3.53294e-07
nodule	donor6_3.TTCGGCAACCCGCTGA.1	1.75907e-07	2.28808e-08	3.49602e-08	0.0134794	1.80421e-08	0.944595	4.12288e-08	0.0419257	2.84049e-08	5.24245e-08
nodule	donor6_3.TTGACCATGTTCTCCG.1	9.29572e-09	0.0454276	2.27788e-07	0.0242764	7.50876e-09	0.875495	1.2442e-08	2.82793e-08	0.0548011	2.66389e-08
nodule	donor6_3.TTGACTATTGTCCGGC.1	0.0221902	0.0158048	0.0164341	0.018757	0.0519694	0.554912	0.0428341	0.277098	8.11728e-09	1.91003e-09
nodule	donor6_3.TTGGACCTATAACAGT.1	1.04063e-09	4.3203e-10	1.07036e-09	0.0122693	1.19542e-09	0.791207	4.37528e-09	0.156727	7.34579e-10	0.0397967
nodule	donor6_3.TTGGGAAGACGAGCCG.1	1.11499e-07	4.51448e-08	0.00419187	8.08261e-08	1.25424e-07	0.928035	1.26496e-07	0.0677719	3.42176e-08	8.59918e-07
nodule	donor6_3.TTGTAAGGCCAGTTGG.1	0.00381781	1.07706e-08	1.36238e-07	0.0287092	7.45444e-09	0.625649	0.00847366	0.279205	1.41563e-08	0.0541457
nodule	donor4_1.AACCGCTAAGGGATGC.1	1.90269e-08	0.465102	2.8647e-09	1.8668e-09	0.0534335	0.259608	3.48456e-09	0.0288853	0.192971	3.21314e-09
nodule	donor4_1.AACTCCTAATCCCATG.1	1.09608e-07	0.0352605	0.0866705	0.0232814	0.029368	0.678851	0.0833224	0.0632461	8.04068e-08	1.21827e-07
nodule	donor4_1.AAGTTCAGTCTGCGTA.1	0.0174627	2.42367e-09	0.013277	0.0145624	1.79527e-08	0.866048	0.0467352	0.0419147	1.31855e-09	3.00846e-09
nodule	donor4_1.AATCTATGCCGGAGCC.1	4.99273e-10	0.00195054	7.63143e-09	9.68291e-10	0.0108391	0.664356	0.0875994	0.144287	9.49593e-10	0.0909687
nodule	donor4_1.AATTCATAAGGGATCT.1	6.56574e-07	0.113574	1.25155e-06	0.0335281	1.33825e-06	0.766077	0.0521231	0.0346905	2.54738e-06	1.74737e-06
nodule	donor4_1.ACACCTTAAGTAGGGC.1	8.13953e-10	7.37044e-09	1.24023e-09	1.24986e-09	1.77682e-09	0.993434	1.66546e-09	2.29998e-09	0.00656584	1.78752e-09
nodule	donor4_1.ACCCGGATGACGCATC.1	0.00511398	0.0465771	2.2451e-07	0.00840991	0.0350644	0.829927	9.1036e-07	0.0726576	0.00224841	2.78711e-08
nodule	donor4_1.ACGGCCAACATGGACT.1	0.0346826	0.0679052	3.15167e-09	1.24846e-08	0.00522467	0.698885	0.157719	0.035584	3.71159e-09	4.87584e-08
nodule	donor4_1.ACTCCCGAATTCGTTT.1	0.0320822	5.79644e-08	7.33406e-08	0.04298	3.38005e-08	0.624262	0.135448	0.130121	0.0351064	5.09107e-08
nodule	donor4_1.ACTTTACCCTCATGAA.1	4.65082e-08	0.0151557	4.46516e-08	0.0101861	2.09793e-08	0.906132	7.3137e-08	0.0685257	1.43851e-07	7.4503e-08
nodule	donor4_1.AGCAACATATCTTATT.1	8.57048e-09	0.144026	1.1302e-08	0.03498	0.0770216	0.601379	0.0437427	0.0489358	0.0435722	0.00634202
nodule	donor4_1.ATATCAACCTACAGAG.1	0.00116103	2.83869e-09	1.19558e-09	0.00690379	3.93429e-08	0.851873	0.0464297	0.0936327	4.53387e-09	1.08643e-09
nodule	donor4_1.ATTAATGAACCAGTCG.1	2.23889e-08	2.69588e-08	3.22357e-08	7.73336e-08	3.5578e-08	0.857484	5.42494e-08	0.142516	2.33163e-08	2.82557e-08
nodule	donor4_1.CAAGTGTGGTTGCAAA.1	0.0106627	1.50282e-07	0.020688	0.0271112	0.0200864	0.748988	0.0320474	0.140416	2.66616e-08	1.10953e-07
nodule	donor4_1.CCACGGTGCCCGGTAG.1	1.6338e-07	0.0334245	9.74203e-08	0.0385685	0.131829	0.550836	0.0338526	0.149278	8.96702e-08	0.0622111
nodule	donor4_1.CCGCTTGCTGACATGG.1	0.0310696	0.0811012	8.33239e-07	0.0165408	0.0309188	0.696302	1.09115e-06	0.14268	6.57501e-08	0.00138548
nodule	donor4_1.CTGCGGTAGTCACGTG.1	3.93115e-07	0.0363264	0.0947161	0.00966943	0.00994787	0.80128	6.31841e-07	2.77951e-07	0.0480588	5.03048e-07
nodule	donor4_1.CTGCGTTACGATATAA.1	0.0103976	0.106862	0.0636721	0.0404379	0.108646	0.533976	0.079274	0.0515647	0.00516946	1.36431e-07
nodule	donor4_1.GAAAGAACAGCGTTAT.1	3.91283e-07	0.0859836	0.0954874	1.10536e-06	0.0566959	0.728782	4.97092e-07	0.0330465	1.97062e-06	6.94138e-07
nodule	donor4_1.GAAATTAGCACGGATA.1	2.58916e-08	2.76836e-08	1.62154e-07	0.00510505	1.12914e-07	0.832759	0.104033	0.0581027	2.36929e-08	3.92429e-07
nodule	donor4_1.GCAACCACCAGACCGG.1	0.00413819	0.0552742	0.140969	0.0231396	0.0766958	0.608649	1.22649e-06	0.0703051	3.31815e-07	0.0208283
nodule	donor4_1.GCGCTGATCCAGACTC.1	1.05194e-07	0.011352	0.0470709	0.011158	0.0389831	0.591567	5.1605e-06	0.299863	3.97217e-07	4.97437e-07
nodule	donor4_1.GCTAGTAGAGCTTGTA.1	7.07385e-10	0.147673	1.22798e-09	1.04302e-09	9.80121e-10	0.505797	1.74244e-09	0.0372212	0.309309	1.34492e-09
nodule	donor4_1.GCTCATTACTGCATGT.1	4.3285e-09	1.68525e-08	2.80499e-09	2.34962e-09	0.0272876	0.855664	1.23505e-09	0.109461	0.00758696	1.0742e-09
nodule	donor4_1.GGATTTCACTTCTATA.1	5.52008e-09	2.20762e-08	1.05112e-08	0.0111354	2.07373e-06	0.908401	0.0107332	0.0411464	0.00311168	0.0254701
nodule	donor4_1.TAATAAACAAGGAGAT.1	6.7765e-09	0.0878968	0.0562873	0.0223039	1.82262e-08	0.683089	0.0548626	0.0854706	0.0100896	1.17989e-08
nodule	donor4_1.TAGTCTGTGACGTTGC.1	2.77642e-08	4.90509e-08	5.72752e-08	8.56454e-08	0.0409853	0.861464	2.02891e-07	0.0876802	7.37679e-08	0.00987015
nodule	donor4_1.TGCGTTTGTTGACACT.1	4.24841e-10	0.0110197	8.25976e-10	0.00471197	6.83223e-10	0.757915	1.64025e-09	0.226353	1.31319e-09	8.82702e-10
nodule	donor4_1.TGCTGTTGAAGAACTC.1	1.64811e-09	0.0328552	5.22812e-09	1.9242e-09	0.206867	0.605832	0.0569807	0.0292742	0.038935	0.0292563
nodule	donor4_1.TGGGATGCACTCATTC.1	4.90716e-08	1.23617e-07	0.0767084	0.0955977	0.0179348	0.803814	2.7108e-07	1.83964e-06	0.00594271	3.41996e-07
nodule	donor4_1.TTAACCAACCCTCCCT.1	5.77845e-08	8.48533e-08	1.13618e-07	1.17189e-07	0.00320808	0.9271	2.21087e-07	0.0696911	6.46836e-08	8.8002e-08
nodule	donor4_1.TTCCATCATGCGGTGA.1	2.93047e-07	0.0088486	0.282405	3.99378e-07	4.11154e-07	0.683794	5.91295e-07	4.50801e-07	0.0249496	5.98005e-07
nodule	donor4_1.TTCGTAATCCCAGCGG.1	2.08648e-08	0.0653693	8.4685e-08	4.02205e-08	5.25841e-08	0.826078	0.00902748	0.0995254	3.10123e-08	3.13043e-08
nodule	donor4_1.TTCTGACCGGGCTCAA.1	1.55934e-09	0.0973348	2.55341e-08	0.010194	0.081782	0.735614	0.00727445	0.0592319	0.00856915	2.06175e-09
nodule	donor4_1.TTCTGCTAGACTCCAA.1	1.38837e-09	0.0306524	5.61608e-08	0.0452931	0.00563619	0.819698	6.74673e-09	0.0738066	2.23843e-09	0.0249134
nodule	donor4_2.AAAGACCCAAGTCGCG.1	2.70287e-09	4.5212e-09	0.0903332	0.0117028	2.83452e-09	0.897964	6.71308e-09	4.96644e-09	3.43446e-09	1.66714e-08
nodule	donor4_2.ACGTACAGATTTCTCT.1	0.00523127	0.346888	2.54919e-08	0.0134725	6.43882e-09	0.507984	7.87573e-09	0.0982458	1.20956e-08	0.0281788
nodule	donor4_2.AGGACATCGCACGTCG.1	1.71894e-07	1.75238e-07	0.216882	1.50578e-07	0.0375848	0.619378	9.06789e-07	0.125967	4.81175e-08	0.000187233
nodule	donor4_2.AGGACGACCCATTAGA.1	1.09856e-08	0.0172757	1.68276e-08	2.18117e-07	0.00523924	0.87521	7.28305e-08	0.102275	1.36418e-08	1.66578e-08
nodule	donor4_2.AGGCTATGGTTAGCTT.1	3.26637e-08	2.68637e-08	0.0768082	1.15325e-08	0.0293739	0.489406	0.141901	0.159131	7.3177e-09	0.10338
nodule	donor4_2.AGGGTTCCCTTTGGTT.1	1.51165e-08	0.279629	0.427358	2.61642e-08	0.00693634	0.248072	8.93515e-09	8.67362e-09	5.23346e-08	0.0380043
nodule	donor4_2.ATAGTGAAGCGTTCTC.1	5.38782e-09	1.51164e-08	9.11346e-09	0.0421236	0.0171374	0.763143	0.0616979	0.115898	3.54638e-09	1.84224e-08
nodule	donor4_2.ATGCCATTTGCGACCA.1	1.69137e-09	0.173116	1.06384e-09	4.46216e-10	6.26044e-10	0.681539	5.97055e-10	0.0194228	0.0920582	0.0338633
nodule	donor4_2.ATTGGGAATATCTTGG.1	9.54481e-10	0.00917151	0.0193728	0.0408854	2.544e-09	0.751573	0.0385988	0.140398	8.41896e-10	2.87746e-09
nodule	donor4_2.CACGCGGAACTGTTGC.1	8.27473e-08	0.0117708	0.196474	3.97793e-08	6.92914e-08	0.56771	2.04657e-07	0.0435614	0.142113	0.0383703
nodule	donor4_2.CATTATGCTTGTTGTG.1	9.48302e-10	1.46882e-08	1.83152e-08	1.30656e-09	2.30949e-09	0.765987	0.0840756	0.149937	2.77201e-09	1.76844e-09
nodule	donor4_2.CCCGCCATGCTCCCGT.1	1.95975e-09	0.34587	0.0283925	1.45873e-09	2.994e-09	0.518687	4.60539e-09	1.8611e-08	0.107051	4.89168e-09
nodule	donor4_2.CCGTTCCGAATCTCGG.1	2.37259e-09	1.68514e-09	2.68249e-09	0.00573599	4.63872e-09	0.8338	6.271e-09	0.160464	9.72346e-09	4.2752e-09
nodule	donor4_2.CCTACTGCTTACACTT.1	1.04385e-09	1.58053e-09	2.04831e-09	1.17916e-09	0.0525209	0.81373	9.4806e-09	0.13375	1.20966e-09	1.6533e-09
nodule	donor4_2.CCTTTAAGGGAGCACT.1	6.19065e-09	5.40743e-09	1.43944e-08	0.0445764	0.0342616	0.581608	0.218873	0.116558	4.79048e-09	0.00412241
nodule	donor4_2.CGTCAGTGCGCACAAG.1	1.14211e-08	4.43372e-09	8.62131e-08	6.67714e-07	1.04165e-08	0.575559	0.00100323	0.372401	3.88917e-09	0.0510364
nodule	donor4_2.CTAAATCCTATTCCGG.1	0.000611191	0.0592545	0.0914068	8.12702e-07	8.89554e-08	0.615936	3.72721e-07	0.0328445	0.199945	2.30615e-07
nodule	donor4_2.CTCACATTTACTAAAT.1	1.71143e-07	0.471231	1.92008e-07	3.22944e-07	1.18173e-07	0.0469035	1.32684e-07	1.44836e-07	0.481864	4.63156e-07
nodule	donor4_2.CTGAAAGAGATCCGAC.1	2.37736e-08	0.140819	0.0209216	0.0165461	0.069383	0.655724	0.0252957	0.00739834	0.0293403	0.0345724
nodule	donor4_2.GACTGCACCAGCCCAG.1	3.27724e-10	1.62662e-10	3.99021e-10	4.15416e-10	0.0252435	0.816937	9.64537e-10	0.152908	1.20712e-10	0.00491148
nodule	donor4_2.GCACGCCTACTTAGAT.1	8.09727e-09	0.00170325	4.76729e-08	9.96882e-09	1.05112e-08	0.789061	0.0240351	0.185201	1.17388e-08	7.9443e-09
nodule	donor4_2.GCCCGCGCGTAAACGG.1	2.00575e-09	2.10333e-09	5.39642e-09	9.85983e-10	0.022885	0.904423	0.0726924	4.73523e-09	1.66217e-09	1.38883e-09
nodule	donor4_2.GTCATTAGAGCGAACG.1	6.09662e-06	5.67085e-09	1.33011e-08	8.23458e-09	2.40697e-08	0.910887	0.00867086	0.0611249	5.96505e-09	0.0193109
nodule	donor4_2.TAGCTAGAAGGCATGA.1	3.96623e-08	1.11807e-08	1.44597e-08	1.08377e-08	6.11229e-07	0.906771	0.042522	0.0430737	9.71794e-09	0.00763247
nodule	donor4_2.TAGTTTATTCTTGCTT.1	0.00589269	0.011136	6.498e-10	0.0251625	3.68651e-10	0.854474	2.81281e-09	0.103335	3.14905e-10	2.47057e-09
nodule	donor4_2.TCAGGTTCTTTGAGAA.1	0.01135	0.0180803	8.92071e-07	6.93661e-07	0.0371263	0.784525	1.95052e-06	0.135377	1.61304e-07	0.0135375
nodule	donor4_2.TCATACTTACAGATCC.1	1.93227e-08	0.00967159	1.44798e-08	2.09637e-08	8.74523e-09	0.990328	9.97701e-09	1.28011e-08	8.68082e-09	5.28674e-08
nodule	donor4_2.TCGCGTCCAGAAGGTC.1	3.79852e-09	0.0991317	7.56354e-09	4.15886e-09	6.37362e-09	0.610757	0.14611	0.144002	3.79653e-09	5.63433e-09
nodule	donor4_2.TCGGAATGCGCTCTGA.1	2.91031e-08	0.0336086	9.077e-08	0.00869249	0.174043	0.558995	1.15942e-07	0.224661	7.52379e-08	6.29296e-08
nodule	donor4_2.TGAGCCATACAGTCTC.1	3.47723e-09	2.34692e-09	2.8594e-09	5.21492e-09	4.98646e-09	0.785858	3.74325e-09	0.214142	2.21027e-09	8.13577e-09
nodule	donor4_2.TGTATGGCGCAGACAG.1	4.42373e-08	0.0792854	0.220855	4.67133e-08	0.00839711	0.638821	0.0526402	1.28976e-07	1.21966e-06	4.11743e-08
nodule	donor4_2.TTCGTACTCCAGAACG.1	5.35317e-10	4.57003e-10	6.9706e-10	9.61493e-10	2.47742e-09	0.702236	3.08783e-09	0.297764	4.14972e-10	1.11164e-09
nodule	donor3_1.AAACTGCTGGCTCCAA.1	1.08559e-06	0.000875244	1.68941e-07	0.00649659	1.42313e-07	0.905946	0.0121399	0.0745403	1.43384e-07	2.19838e-07
nodule	donor3_1.AAGAGCTCTTTATCGG.1	1.79292e-09	6.16326e-09	5.69876e-09	7.53502e-09	2.69105e-09	0.984883	3.764e-09	0.0151172	3.52273e-09	7.39232e-09
nodule	donor3_1.AAGAGGCATGGATCGC.1	1.61764e-07	5.69301e-08	3.44362e-07	9.76908e-08	9.61073e-08	0.894317	3.15382e-07	0.105681	1.06368e-07	9.6158e-08
nodule	donor3_1.AAGTGACGACCGAATT.1	3.28184e-07	1.59021e-07	1.86243e-07	1.44292e-07	2.12737e-07	0.861315	6.45457e-07	0.138683	1.18338e-07	4.51486e-07
nodule	donor3_1.AATCGCCTCAGCGCCA.1	4.6607e-10	6.75032e-10	7.07455e-10	4.76525e-10	3.4108e-10	0.978241	1.61695e-09	0.0217594	3.62513e-10	3.02589e-09
nodule	donor3_1.AATGCAACCGGGTACC.1	1.90255e-08	0.0192899	1.47158e-07	0.0508782	0.032466	0.585955	0.190723	0.0562846	0.0644033	6.57275e-08
nodule	donor3_1.ACCCTATGCCATATCG.1	0.00564305	0.00956929	3.12408e-08	0.0630084	2.95265e-09	0.777257	0.0354728	0.109049	2.59399e-08	1.26835e-09
nodule	donor3_1.ACGTTAGATTTGCCCG.1	1.03688e-08	0.00441588	1.80582e-08	1.78708e-08	2.19488e-08	0.709688	1.56989e-07	0.285896	2.80673e-08	6.95582e-08
nodule	donor3_1.ACTCGTCAGTAATCCC.1	5.87846e-10	1.00122e-09	1.00872e-09	0.00647921	2.61065e-09	0.944066	4.70675e-07	0.0494545	8.85064e-10	4.8151e-09
nodule	donor3_1.ACTTGACTCCCTCTTT.1	4.53137e-08	7.15319e-09	2.81281e-08	1.20762e-08	1.27076e-08	0.647301	0.0169039	0.333044	2.79675e-08	0.00275064
nodule	donor3_1.AGATACCGGTGTTCAC.1	5.83249e-09	4.85947e-09	6.65419e-09	8.76689e-08	8.93142e-09	0.823276	2.03063e-08	0.176724	5.14515e-09	1.07218e-08
nodule	donor3_1.AGGTAGGTACAAAGCT.1	1.85415e-08	0.0393322	5.13131e-08	5.90884e-08	0.0961356	0.671232	7.21942e-08	0.173803	3.01923e-08	0.0194968
nodule	donor3_1.ATAGAGTACTGGGACA.1	1.55134e-05	2.03016e-06	8.96711e-07	0.0303716	0.0522666	0.682294	0.10058	0.134451	7.18333e-07	1.74438e-05
nodule	donor3_1.ATAGGGATATCCTTGA.1	3.29525e-08	4.27326e-08	6.35539e-08	8.59798e-08	5.1877e-08	0.907503	8.80482e-08	0.0924968	5.70541e-08	8.52938e-08
nodule	donor3_1.ATGTGAAAGCCTAATG.1	0.0210017	2.38114e-09	0.0436461	1.56679e-09	0.163506	0.666596	2.72194e-09	0.105251	1.2224e-09	1.48836e-09
nodule	donor3_1.ATTCAGTAGCAGGGTC.1	3.79833e-08	0.045648	2.10478e-07	0.113214	8.32911e-08	0.478428	0.0760687	0.250281	0.0186145	0.0177456
nodule	donor3_1.ATTCCTCCGCCAGTGC.1	1.67349e-08	1.2512e-08	2.36861e-08	5.58961e-08	0.0125509	0.922144	1.5475e-07	0.0639471	1.73181e-08	0.00135752
nodule	donor3_1.ATTCGACGCCGGGCCT.1	1.3129e-09	6.79388e-09	7.27928e-09	9.18171e-09	0.129802	0.733067	6.11193e-09	0.137131	3.82317e-09	3.98264e-09
nodule	donor3_1.CAATTTCGTATAAGGG.1	2.23001e-07	1.27201e-07	2.05874e-07	1.63004e-07	1.5867e-07	0.951555	3.65543e-07	0.0484429	1.34443e-07	2.43299e-07
nodule	donor3_1.CACGCAGCGAGGCTTT.1	6.93079e-10	5.23641e-10	6.9107e-10	0.007785	1.31878e-09	0.660545	0.177933	0.13543	0.018307	7.00548e-10
nodule	donor3_1.CACTAAAGTTGCCTAT.1	8.2224e-10	1.29688e-08	8.24077e-09	1.66509e-09	2.05897e-09	0.877522	0.0319629	0.0288943	0.0616205	1.99486e-09
nodule	donor3_1.CAGCTCACTGAGACAT.1	5.88444e-09	4.35951e-09	4.98341e-09	3.20203e-09	5.01052e-09	0.817782	1.22919e-08	0.182218	3.63454e-09	3.83136e-09
nodule	donor3_1.CATGGTAAGTAGCGTT.1	0.00640787	7.49857e-09	3.23192e-08	1.03945e-08	2.21364e-08	0.938619	5.48036e-08	0.0549729	1.71827e-08	1.80225e-08
nodule	donor3_1.CCAGCCTGGACCAATA.1	3.41374e-08	1.20111e-07	7.83895e-08	0.00979524	2.39679e-07	0.797993	4.02617e-07	0.192211	5.77306e-08	5.54465e-08
nodule	donor3_1.CCATGCTCTGCAGGAA.1	6.56038e-07	0.00964112	2.62226e-07	0.00145325	2.73822e-07	0.815066	0.0994421	0.0743962	1.60207e-07	1.55169e-07
nodule	donor3_1.CCCAGTTAAGGCGCCG.1	3.1551e-08	0.00711704	8.58558e-08	1.02251e-07	2.75926e-08	0.846218	1.28454e-07	0.146664	4.20424e-08	4.13783e-08
nodule	donor3_1.CCCTGCGCTACGCATA.1	0.00470342	3.66676e-10	1.11843e-09	0.0367584	0.0288439	0.641904	0.135219	0.152572	1.33048e-09	4.22158e-09
nodule	donor3_1.CCGACGGGCATGAGGT.1	0.0137027	0.00168867	9.9437e-07	0.000791341	5.75529e-07	0.704489	0.0597164	0.219604	7.3572e-07	5.1875e-06
nodule	donor3_1.CCTACTGCTTACACTT.1	6.48264e-09	4.59804e-07	1.28103e-08	1.31218e-08	1.83082e-08	0.7005	0.220974	0.0785246	9.0317e-09	1.80751e-08
nodule	donor3_1.CCTGTCGCCCGTAAAT.1	0.00095566	2.71475e-09	7.20806e-09	6.23235e-09	1.02448e-08	0.919934	4.56687e-09	0.07911	4.83208e-09	5.03868e-09
nodule	donor3_1.CGAGGGACTGCGGTCG.1	4.99854e-10	4.91089e-10	7.1542e-10	7.07275e-10	6.8103e-10	0.920187	1.08562e-09	0.0798131	5.28027e-10	7.9204e-10
nodule	donor3_1.CGCAATTAGGGTAATA.1	1.63827e-07	1.13893e-07	7.21076e-07	0.0177978	0.0416806	0.594107	0.151519	0.194894	4.17027e-07	1.28602e-07
nodule	donor3_1.CGCAATTCTACAATAA.1	1.95311e-09	1.66827e-09	4.67024e-09	0.012188	7.61344e-09	0.85276	0.0699751	0.0522777	3.47319e-09	0.0127988
nodule	donor3_1.CGCATGGTGCGATGCT.1	0.00755708	2.84968e-08	8.88545e-08	1.87587e-08	2.66589e-08	0.898947	9.97721e-08	0.0934956	2.56082e-08	1.52549e-08
nodule	donor3_1.CGCCCTTGAAGGCTGA.1	0.0362635	0.033604	1.89521e-08	5.08666e-07	0.0518712	0.730184	2.80026e-08	0.147506	9.50682e-09	0.000571301
nodule	donor3_1.CGCCTCCCTCCTCTAT.1	5.06864e-09	1.41796e-09	2.53702e-09	5.42311e-09	2.44193e-09	0.695407	4.58176e-09	0.304593	1.88555e-09	1.77515e-09
nodule	donor3_1.CGCTCGACATAATGAT.1	2.283e-09	9.86172e-10	3.38646e-09	0.0362336	2.75863e-09	0.808281	4.90637e-09	0.120659	2.52776e-09	0.0348263
nodule	donor3_1.CGCTCTCCGTAGATTA.1	8.07078e-07	6.91119e-08	1.25104e-07	0.0348648	7.96305e-08	0.809955	7.89574e-07	0.103983	1.73337e-07	0.051195
nodule	donor3_1.CGGGATCAATGTAAGA.1	0.00983748	4.1791e-08	0.0756907	1.78021e-08	0.0796818	0.640855	1.67613e-08	0.193935	1.69192e-08	1.10687e-08
nodule	donor3_1.CGTGCAGACTGGGACA.1	0.00531888	4.5961e-08	5.86204e-08	2.50238e-07	5.93636e-08	0.85837	1.10607e-07	0.13631	4.89697e-08	9.49289e-08
nodule	donor3_1.CTAGTCACGTCTTAAG.1	5.87833e-09	1.04878e-08	1.15159e-08	9.23358e-07	8.31364e-09	0.795994	5.75537e-08	0.193579	2.49417e-09	0.0104256
nodule	donor3_1.CTAGTGAAGGACAGGA.1	8.32422e-09	1.99749e-08	8.96687e-07	0.0844519	0.0306463	0.524643	0.0766106	0.283648	2.58741e-08	1.59999e-08
nodule	donor3_1.CTATTTGGTTACGGAT.1	0.00369477	4.81444e-08	7.58731e-08	0.0225747	5.89416e-08	0.690453	1.62515e-07	0.283277	4.35072e-08	1.84666e-07
nodule	donor3_1.CTCTCACAATCGATGA.1	0.00331038	0.00675792	3.1902e-07	8.49442e-08	1.49165e-07	0.932789	2.47398e-07	0.0571413	1.71599e-07	1.78762e-07
nodule	donor3_1.CTGCACTCCAGTACAG.1	2.77676e-09	0.00301439	1.10758e-08	0.0541132	2.22737e-09	0.769369	0.0592281	0.114275	4.49364e-09	3.51638e-09
nodule	donor3_1.CTGCTGAGGCCACGAA.1	3.41226e-09	0.00890592	0.0259256	0.0102054	0.0527766	0.620793	0.0721604	0.209233	2.99205e-09	3.69168e-09
nodule	donor3_1.GAACGTTAGGAAGACG.1	0.0348516	5.7733e-09	1.23759e-08	2.32058e-09	1.64093e-09	0.78068	2.43257e-09	0.184468	3.86077e-09	9.45257e-08
nodule	donor3_1.GAAGCTTGCTGACCGC.1	4.16827e-08	1.31268e-07	7.34177e-08	0.0128112	1.22315e-07	0.718333	1.05589e-06	0.268854	5.72628e-08	2.26856e-07
nodule	donor3_1.GACGACGATCCGCGTT.1	0.00673821	0.0380345	0.0257789	0.0672234	2.75558e-07	0.648527	0.0615849	0.142879	6.6123e-08	0.00923304
nodule	donor3_1.GACTGCGGCACGTGTA.1	4.72395e-06	1.17782e-05	0.0497961	0.0472242	8.43507e-06	0.598415	0.0857906	0.208961	0.00978159	5.77531e-06
nodule	donor3_1.GAGGAATGGAGAGGTT.1	1.20113e-07	5.84499e-08	2.76238e-07	0.0480723	2.90864e-06	0.661751	0.0960883	0.194085	6.58766e-08	4.76753e-07
nodule	donor3_1.GAGTCCGCTTACCGGA.1	1.8178e-09	0.0201605	7.7777e-09	3.66906e-09	0.0458131	0.716665	0.0552151	0.162146	5.01425e-09	3.62035e-09
nodule	donor3_1.GAGTTGATGGCAATTT.1	1.22207e-07	0.067105	4.5034e-07	0.0304198	1.52527e-07	0.569694	3.98102e-07	0.332779	4.93732e-07	5.05422e-07
nodule	donor3_1.GATCATTCCAAACATT.1	0.00935634	2.89819e-06	0.00945936	0.00272556	7.59579e-09	0.854165	0.0149501	0.102375	3.77953e-09	0.00696523
nodule	donor3_1.GATCTTGGAGGGCATA.1	2.4845e-08	4.00198e-08	5.746e-08	0.0192931	1.38102e-07	0.722501	2.71706e-07	0.258205	3.2409e-08	1.57306e-07
nodule	donor3_1.GATTCCTATACGGCGC.1	0.037915	4.56692e-09	8.96993e-10	0.0109383	7.83701e-09	0.661779	0.0808376	0.208531	2.92075e-10	1.82541e-09
nodule	donor3_1.GCATAGAGCACTCAGG.1	6.88425e-08	9.39748e-08	8.63452e-08	8.43895e-08	1.66413e-07	0.85404	8.29788e-07	0.145958	3.934e-08	2.8579e-07
nodule	donor3_1.GCCTAGCGATCTGACC.1	0.0062935	8.03467e-10	2.28581e-09	0.0469599	1.14026e-09	0.662049	0.0149114	0.183985	0.0858017	3.2331e-09
nodule	donor3_1.GCGACGATAGTTGTAC.1	3.1406e-07	0.0541425	8.74989e-07	1.51948e-06	0.0244314	0.683129	0.134071	0.0875052	0.0167179	9.11766e-07
nodule	donor3_1.GCGGACCGCGTTGTGG.1	3.34379e-09	8.7982e-10	1.1907e-09	1.31477e-09	5.79268e-10	0.697101	9.58411e-09	0.302899	4.71972e-10	4.67074e-10
nodule	donor3_1.GCTAAGTAGTTTCTCT.1	0.00906297	8.56246e-08	4.95062e-07	1.50258e-06	6.0385e-08	0.981434	3.14785e-07	0.00853374	0.000966336	5.31264e-07
nodule	donor3_1.GCTAATACCGAATGCC.1	0.00665188	0.172097	4.5067e-08	0.00953784	1.25549e-08	0.695301	1.49432e-06	0.11641	2.21298e-07	3.58168e-08
nodule	donor3_1.GCTAGCTTGAATAGCT.1	0.00595223	1.26358e-08	3.62681e-08	0.0216317	6.92186e-08	0.738638	0.132876	0.100901	1.98841e-07	9.58691e-08
nodule	donor3_1.GCTTGATGATAATCAG.1	6.78937e-09	1.00473e-08	1.05209e-08	3.65968e-08	1.10249e-08	0.8297	1.75269e-08	0.1703	9.25418e-09	1.41724e-08
nodule	donor3_1.GGAACCGTGTAAATTG.1	6.66948e-10	1.312e-09	1.21396e-09	0.0529152	1.09741e-09	0.688979	0.0800085	0.178097	3.85608e-10	1.2018e-08
nodule	donor3_1.GGGAACGGGAGGTTAG.1	1.34808e-07	3.20138e-08	8.43432e-08	4.38329e-07	2.51559e-07	0.629716	9.35507e-07	0.370282	4.68885e-08	9.6183e-08
nodule	donor3_1.GGGACTGCATAGATAG.1	0.0015959	8.43109e-08	2.03216e-07	0.00940334	2.61755e-07	0.838126	0.0183561	0.132518	1.12419e-07	1.51501e-07
nodule	donor3_1.GGGCTGCCTAGGGCGA.1	1.08956e-09	1.04919e-09	1.76573e-09	0.0118318	4.58142e-09	0.824114	2.39759e-09	0.164054	1.34287e-09	7.79881e-09
nodule	donor3_1.GGTCGGTCGTCCACAG.1	1.45113e-09	1.09789e-09	3.5102e-09	0.0574844	1.63282e-09	0.542647	0.238847	0.161022	2.1722e-09	1.82152e-09
nodule	donor3_1.GGTTAGTTACGGCGCC.1	0.00874957	5.29592e-08	7.5203e-08	0.0266107	1.53938e-07	0.824605	0.13229	8.89562e-07	5.04691e-07	0.00774301
nodule	donor3_1.GTCATTAGAGCGAACG.1	3.77855e-10	1.05324e-09	6.66785e-10	1.6214e-09	4.50926e-10	0.803327	3.4194e-09	0.192531	7.26514e-10	0.00414209
nodule	donor3_1.GTGAGGACACTTAAGG.1	0.000501356	1.30501e-08	2.83758e-09	2.83194e-09	1.99198e-09	0.949091	6.50742e-09	0.0504076	4.80521e-09	4.25007e-09
nodule	donor3_1.GTGGGCTTAGACACAC.1	3.05166e-08	4.29009e-08	8.71077e-07	0.0137802	1.82588e-07	0.636332	0.120966	0.22892	9.06187e-08	2.52589e-07
nodule	donor3_1.GTTACCTACAACTTGC.1	7.09746e-08	1.68683e-07	5.02855e-08	0.0309805	2.68248e-08	0.663852	0.205512	0.0996555	2.54654e-08	3.5294e-08
nodule	donor3_1.TACATTTCTAACGTGC.1	1.00237e-10	2.55372e-10	2.03992e-10	1.84007e-10	0.00138389	0.851765	1.47529e-09	0.146851	9.23552e-11	1.30082e-10
nodule	donor3_1.TAGATATGGACTGGAA.1	2.06038e-06	1.47369e-07	2.96577e-07	0.0596477	1.41642e-07	0.663871	0.245347	0.0311196	1.41178e-07	1.14415e-05
nodule	donor3_1.TAGCGTTGGGTCTTAC.1	1.01058e-07	7.61165e-09	1.10493e-08	0.00451999	1.27951e-08	0.848176	6.53574e-08	0.147303	7.40641e-09	1.79486e-08
nodule	donor3_1.TAGCTAAGTCCGGGAG.1	2.79945e-09	1.35817e-08	7.61676e-09	0.0014106	3.82837e-09	0.813816	3.56736e-08	0.184773	2.51641e-09	8.42753e-09
nodule	donor3_1.TAGGTGAGCCCTACTC.1	2.2684e-09	0.0195937	2.60991e-09	0.0213924	0.0130925	0.756978	1.21903e-08	0.188347	0.000595961	1.49131e-09
nodule	donor3_1.TATTCAATTCTAATCC.1	2.95125e-10	3.29868e-10	3.14376e-10	1.01755e-09	1.49377e-09	0.976674	1.15e-09	0.0233261	2.53006e-10	5.02988e-10
nodule	donor3_1.TATTCCACTCAGCTCG.1	8.87042e-09	3.59656e-09	1.72569e-08	1.00413e-07	7.15953e-09	0.529691	0.186386	0.283923	1.01228e-07	9.00332e-09
nodule	donor3_1.TATTTGTTACCCTTTA.1	2.97135e-08	1.34006e-07	4.44585e-07	1.47492e-06	0.0895421	0.768606	0.0855609	0.0393351	1.3042e-07	0.0169533
nodule	donor3_1.TCGGACGCCCAGCCCA.1	2.70842e-08	0.00835956	0.0348251	1.09479e-08	1.04764e-09	0.699751	1.94601e-09	1.81459e-08	0.229565	0.0274984
nodule	donor3_1.TGCATGGATCGGATCT.1	1.94961e-09	3.31733e-09	4.249e-09	3.32766e-09	4.03546e-09	0.794337	2.37747e-08	0.205663	1.87721e-08	5.25449e-09
nodule	donor3_1.TGCTGTTGAAGAACTC.1	6.51784e-07	1.51462e-07	2.6036e-07	9.70478e-08	1.3175e-06	0.872486	2.23472e-07	0.127511	9.68602e-08	3.31136e-07
nodule	donor3_1.TGGCAGCAGTAATAGT.1	5.26117e-08	2.3727e-07	2.05562e-07	4.26535e-07	0.12581	0.820794	4.68269e-07	0.0533939	6.45249e-08	1.08744e-07
nodule	donor3_1.TGTGACTACGCCAGTC.1	9.25479e-09	1.16601e-07	2.29522e-08	8.65965e-09	3.96719e-08	0.966251	5.55311e-08	0.0337486	1.26067e-08	1.12358e-08
nodule	donor3_1.TGTTTCGGTACTTCTC.1	6.68686e-08	0.118507	0.0587114	0.0583264	2.93743e-08	0.433678	1.74984e-08	0.0498059	0.280972	2.26047e-08
nodule	donor3_1.TTAACCAACCCTCCCT.1	8.63178e-09	0.0267063	0.0252964	0.0138794	0.0143992	0.681927	0.152112	0.0856797	3.91831e-08	2.15327e-08
nodule	donor3_1.TTACAACTACGCATCC.1	1.7177e-08	0.0218569	8.77956e-08	0.0010324	0.0217921	0.745386	6.33137e-08	0.209933	3.78342e-08	3.50839e-08
nodule	donor3_1.TTACTCCGGCCGGGAA.1	0.00300301	1.7423e-08	9.04933e-08	3.34132e-08	2.02321e-08	0.845767	1.45873e-06	0.143928	4.3598e-08	0.00730078
nodule	donor3_1.TTATGTTTGCGATAGA.1	1.26892e-07	1.35237e-07	2.55356e-07	0.063447	3.60046e-07	0.623997	0.000710224	0.305882	9.60603e-08	0.00596303
nodule	donor3_1.TTCAAAGTCTCTAGCC.1	1.28876e-10	1.94351e-10	1.60741e-10	0.0044561	5.09216e-10	0.886736	7.70806e-10	0.0954196	1.01394e-10	0.0133883
nodule	donor3_1.TTCCTCGAGGGTGTCT.1	0.0376627	5.24022e-07	4.6011e-07	5.42719e-08	2.98506e-08	0.523681	0.0456372	0.306892	0.0655561	0.0205702
nodule	donor3_1.TTCGACGGGAAGGGCG.1	5.82395e-09	5.78893e-09	1.63139e-08	0.0544811	0.0593625	0.70717	0.0605661	0.11842	7.83658e-09	9.85364e-08
nodule	donor3_1.TTGCGTCGGCCAACCG.1	7.33291e-07	0.167124	6.20967e-07	5.86229e-07	4.72971e-06	0.5261	0.0936225	0.189674	1.93397e-05	0.0234532
nodule	donor3_1.TTGGAAGAATACAGTC.1	0.00279626	0.0125113	7.61317e-09	0.00881202	0.00524078	0.86876	0.0375608	0.0643186	5.45578e-09	9.48383e-09
nodule	donor3_1.TTGTGGCCCTGACAGT.1	1.31487e-08	0.0415902	0.0283341	0.0302272	0.00954691	0.595191	0.29511	3.37346e-07	3.49516e-08	1.2149e-08
nodule	donor3_2.AAATAGGGTGCTATTG.1	8.98999e-09	0.00432373	1.24933e-08	2.00322e-08	8.11112e-09	0.811134	1.43967e-07	0.184542	1.02367e-08	2.93419e-07
nodule	donor3_2.AACTAGGCTTGGGTGT.1	1.50021e-09	1.54086e-08	2.17963e-09	0.0449738	0.0657959	0.640213	0.0437552	0.205262	2.34097e-09	1.98686e-08
nodule	donor3_2.AAGGGACAGATTCTGT.1	1.14536e-08	0.003052	3.30307e-08	0.00766768	1.91642e-08	0.72633	0.094158	0.168792	2.59717e-08	5.97088e-08
nodule	donor3_2.AATGATGATACGCTAT.1	1.06368e-08	6.27392e-08	2.94064e-08	0.0259114	2.26359e-08	0.740718	0.0600208	0.167597	1.59417e-08	0.00575224
nodule	donor3_2.ACAACGGTCCCTGCGA.1	0.00381243	9.72054e-10	1.05489e-09	1.44741e-09	4.88415e-10	0.964028	1.85827e-09	0.0321593	7.87316e-10	1.26645e-09
nodule	donor3_2.ACGGATGGTGCGGATA.1	6.48125e-10	1.48976e-09	0.0251123	0.0185418	1.77674e-09	0.808554	0.0754582	0.0723339	3.01841e-09	4.54757e-08
nodule	donor3_2.ACGTTAATGTCGAAGA.1	4.01212e-07	0.106695	0.0292521	3.45682e-07	2.67311e-07	0.621363	0.164177	0.0522098	0.0172746	0.0090275
nodule	donor3_2.AGCAAAGGCCGCTAGT.1	2.59586e-07	0.00144368	0.13003	0.0174101	6.56146e-08	0.80139	1.99805e-07	3.53747e-07	6.86921e-08	0.049725
nodule	donor3_2.AGGTTTCACACACCTT.1	0.000691537	0.0291853	2.88153e-08	0.0280348	3.57695e-06	0.779074	0.00138572	0.161625	2.93667e-08	5.73426e-08
nodule	donor3_2.AGTGACCTACTTTACG.1	1.2066e-09	0.0295192	3.42414e-09	0.00772156	1.73771e-09	0.760406	0.11124	0.0859096	1.32795e-08	0.00520413
nodule	donor3_2.ATAGAGTACTGGGACA.1	1.87022e-09	1.91806e-09	2.4692e-10	4.02565e-10	3.51285e-08	0.903284	2.48397e-09	0.0967158	2.36398e-10	4.83543e-10
nodule	donor3_2.ATATTTAACCCTCAAG.1	1.03288e-10	9.76792e-11	0.0237649	0.0282365	9.63352e-10	0.494299	0.167473	0.286227	2.01774e-10	3.27434e-10
nodule	donor3_2.ATCACATTAGAATATC.1	4.88696e-08	7.28825e-08	0.0690117	5.36169e-08	0.0938405	0.531174	0.0351096	0.270864	1.11973e-07	3.93315e-08
nodule	donor3_2.ATGACGCCGGCTCTAA.1	0.00763454	2.55529e-10	1.34493e-09	5.20498e-10	1.25667e-09	0.819982	5.57396e-09	0.172383	5.38157e-10	5.86605e-10
nodule	donor3_2.ATGATGCAATGGTACA.1	0.00596171	0.0154913	0.049823	3.63544e-08	2.45575e-08	0.716895	6.51766e-08	0.194295	6.01203e-09	0.0175335
nodule	donor3_2.ATGCCGGTTGATGGGA.1	0.009161	6.54595e-08	6.4545e-07	1.25239e-07	0.11796	0.842287	8.82802e-07	0.0305894	2.33962e-07	1.04588e-07
nodule	donor3_2.ATTGAAGATCTTAGTG.1	6.05641e-10	4.40558e-10	8.23877e-10	1.53409e-09	1.20741e-09	0.751396	0.103087	0.145517	5.22443e-10	7.15063e-10
nodule	donor3_2.CAAATGTCCTTCCGTG.1	1.16166e-07	1.93835e-07	1.01869e-07	0.00512602	0.0100954	0.653031	0.155768	0.175979	5.52713e-08	9.46877e-08
nodule	donor3_2.CACATATTAGCAGGAT.1	4.91715e-09	5.5607e-08	4.7178e-07	8.09985e-09	0.0454087	0.830831	0.00100932	0.0863092	0.0364409	1.95694e-08
nodule	donor3_2.CACATGATTCAGCAAC.1	1.68551e-07	5.92454e-08	1.75685e-07	0.00315675	0.00710426	0.729122	0.11413	0.131196	1.13423e-07	0.0152907
nodule	donor3_2.CACCTTGCGAAACTCG.1	2.01094e-08	0.00454515	0.0148837	0.00350415	4.21238e-08	0.778495	0.106038	0.092534	1.91355e-08	6.09307e-08
nodule	donor3_2.CACGTTCGTGCTCTAG.1	0.0183578	1.74833e-07	5.01042e-07	0.0672468	0.0422319	0.743036	3.42577e-07	0.127052	2.48482e-08	0.0020742
nodule	donor3_2.CAGCTCGACAAGTTAA.1	2.45706e-10	4.48539e-10	0.00660194	0.0194798	1.07744e-09	0.743506	0.0986756	0.117531	1.86487e-09	0.0142051
nodule	donor3_2.CATACTATGTAATTGT.1	9.88799e-10	1.08802e-09	2.61486e-09	1.99971e-09	1.03225e-09	0.82178	0.0580888	0.120131	3.04884e-09	9.39151e-10
nodule	donor3_2.CATTTAGCGGACCATG.1	1.25962e-09	0.114447	3.26635e-08	0.0391671	0.0345484	0.473929	0.096188	0.24172	2.1147e-09	3.9073e-09
nodule	donor3_2.CATTTGAGTGGTACGT.1	1.76891e-09	0.0038226	5.38764e-08	0.0245962	1.42326e-09	0.400469	1.22487e-09	1.97661e-09	0.571112	2.61247e-09
nodule	donor3_2.CCAAGAAAGTGGGCGA.1	4.64295e-08	2.70103e-08	0.0183126	0.0695053	0.00176158	0.695681	6.3627e-08	0.194984	2.71535e-08	0.0197548
nodule	donor3_2.CCAGCCTGGACCAATA.1	1.46201e-09	0.152019	5.93065e-09	0.0599356	0.0259532	0.455118	0.0702941	0.232154	0.00452714	1.00407e-09
nodule	donor3_2.CCGTGGAACGATCCAA.1	7.94549e-09	0.158481	0.073661	6.67012e-10	8.93205e-10	0.419477	1.68636e-09	0.00697494	0.341406	2.02778e-09
nodule	donor3_2.CGACACGCTCCGACAG.1	1.52724e-07	0.00874762	0.0352882	0.0344198	0.0200094	0.685018	9.93755e-07	0.216516	1.70033e-07	9.97505e-08
nodule	donor3_2.CGCTCTCCGTAGATTA.1	2.54791e-07	0.0172651	0.0481327	0.00902478	0.0146899	0.683028	0.00613671	0.1649	0.0568229	1.39796e-07
nodule	donor3_2.CGGAGCAATTTAATCG.1	2.04586e-08	2.29359e-08	5.79293e-08	0.00282196	0.124637	0.745694	0.0338907	0.0929565	1.20949e-08	4.13579e-08
nodule	donor3_2.CGTATTAAGAGATCTA.1	3.26957e-08	7.22259e-09	1.87399e-08	1.74604e-07	0.0145518	0.841349	0.115062	0.0290365	1.99836e-08	1.74722e-07
nodule	donor3_2.CGTTGAATACCGCGCT.1	0.00582916	1.22369e-07	2.21806e-07	0.0191407	0.00571451	0.969314	2.42827e-07	2.84909e-07	1.25966e-07	1.90525e-07
nodule	donor3_2.CGTTTCGCTCATTACA.1	9.12978e-08	1.18181e-07	1.79372e-07	1.71931e-07	1.64687e-06	0.780231	0.0489364	0.145532	0.00795053	0.0173469
nodule	donor3_2.CTCAGTCACGACAAAT.1	0.00442772	0.00410462	9.26366e-10	0.0294333	9.36099e-10	0.826768	0.0451291	0.0901373	5.34462e-10	8.93409e-10
nodule	donor3_2.CTCGATATTTGCGAGC.1	1.10428e-07	3.05639e-07	0.0156633	1.82776e-07	0.0197944	0.775845	0.0950674	0.0912529	0.00237621	1.16628e-07
nodule	donor3_2.CTGTACTTCTTAGCAT.1	3.46548e-09	0.00174821	1.16019e-08	1.89051e-08	0.0224538	0.802775	0.00576805	0.161512	0.00574292	1.34104e-08
nodule	donor3_2.CTTTGGCTTTAGTAAA.1	0.0281111	0.0095394	0.0650329	2.42595e-08	5.29811e-09	0.773592	5.93401e-08	0.112457	0.00942517	0.00184209
nodule	donor3_2.GAAGCTTGCTGACCGC.1	1.37068e-08	6.36175e-09	2.28583e-08	0.01094	1.09858e-08	0.771682	0.0725364	0.140467	8.41001e-09	0.00437451
nodule	donor3_2.GACCAGAGCCCTGTAG.1	0.00637151	1.20044e-10	1.84131e-10	0.023766	2.89125e-10	0.74269	0.0691918	0.15798	1.26831e-10	5.46387e-10
nodule	donor3_2.GAGATCTGCTTGGCAT.1	4.56931e-08	0.00798134	2.61435e-08	0.0742624	5.73304e-08	0.30878	0.0395124	0.569464	3.66226e-08	8.99165e-08
nodule	donor3_2.GAGCACCTGTGTCCAG.1	3.99958e-09	7.7926e-09	2.97672e-08	0.0336833	1.10247e-08	0.880636	0.0644261	2.27303e-08	0.0212546	6.33121e-09
nodule	donor3_2.GAGTGTGCGGTACCCA.1	5.03365e-09	7.95758e-09	0.0126118	0.0114564	1.63286e-08	0.771112	0.132467	0.0723531	2.44597e-09	1.18804e-08
nodule	donor3_2.GATATGCGGTAGCCAA.1	2.54026e-08	6.20651e-08	3.01553e-08	0.0577462	0.00198424	0.709775	0.0361364	0.194358	2.75092e-08	1.91664e-08
nodule	donor3_2.GATCGTGACTGATATC.1	9.23853e-08	8.93755e-08	0.028392	0.00137552	0.0456143	0.745322	2.45223e-07	0.132196	0.0459782	0.00112159
nodule	donor3_2.GCAAACCCTACATTAT.1	4.03489e-09	4.01794e-09	5.25884e-09	2.18208e-08	4.9228e-09	0.952962	1.52322e-08	0.0470375	3.6222e-09	1.42524e-08
nodule	donor3_2.GCAGATCCATAAGACT.1	0.00318882	6.16599e-10	8.86618e-10	0.000765975	5.19301e-10	0.944947	1.39401e-09	0.0510985	7.49097e-10	7.54717e-09
nodule	donor3_2.GCCAGGAGTAACCGAT.1	8.62645e-08	1.0558e-07	2.77795e-08	0.0382134	8.28735e-08	0.801491	0.0334326	0.124266	2.34248e-08	0.0025967
nodule	donor3_2.GCGAAGCCATACCCGT.1	1.91362e-08	3.93748e-08	2.42841e-08	3.64199e-08	3.69495e-08	0.778827	1.40012e-06	0.209236	1.43559e-08	0.0119347
nodule	donor3_2.GCGACGATAGTTGTAC.1	0.0438463	4.47295e-08	1.03548e-06	0.103226	4.32107e-08	0.234382	0.241314	0.281705	0.0955257	1.20961e-07
nodule	donor3_2.GCGCTAATTGAATAGA.1	0.0146226	1.51309e-09	3.39412e-08	0.0597158	2.8664e-09	0.476105	0.30664	0.120717	0.022199	4.0783e-08
nodule	donor3_2.GCTAGGCACCACGGAG.1	2.53402e-07	0.044765	7.16237e-07	0.0243787	1.29798e-07	0.856283	1.4377e-06	0.0567233	0.00757329	0.0102741
nodule	donor3_2.GCTATCATACTCATGG.1	2.1704e-07	1.33959e-07	2.93224e-07	1.42785e-06	7.31778e-07	0.882148	3.48973e-06	0.093392	7.3255e-06	0.0244459
nodule	donor3_2.GCTGCTCTCCGGACAC.1	9.66509e-09	0.0524353	0.0115008	0.0383365	1.51809e-08	0.772603	1.14935e-08	0.117736	7.24999e-09	0.00738796
nodule	donor3_2.GGAAAGTGCCCATGCC.1	0.00221069	1.7202e-08	1.1053e-07	0.0558771	1.74619e-08	0.532473	0.114995	0.287288	2.69603e-08	0.00715528
nodule	donor3_2.GGAGAAGTCATTGGCA.1	1.61923e-09	1.39665e-09	3.56215e-09	2.25519e-09	2.90952e-09	0.857849	5.11786e-09	0.142151	9.35197e-09	2.25995e-09
nodule	donor3_2.GGAGACGACACCTTTG.1	1.27705e-08	5.25016e-09	4.62789e-08	0.00198582	0.130277	0.746773	0.0214118	0.0995521	1.83511e-08	9.17069e-09
nodule	donor3_2.GGATGACGCGAGTTTA.1	0.00463945	3.60244e-08	1.89172e-08	0.0124805	1.51235e-08	0.749703	0.0204655	0.190886	0.0114588	0.0103669
nodule	donor3_2.GGCAAGGCGAAATAGC.1	0.00170128	2.55698e-06	1.59494e-06	0.0553668	0.00454209	0.713647	0.14101	0.0500476	5.9425e-07	0.0336806
nodule	donor3_2.GTATGTGGGTCTAGTT.1	2.81015e-07	0.10263	0.273733	0.0285017	0.0251501	0.346625	5.74487e-07	0.16701	0.056349	2.90468e-07
nodule	donor3_2.GTCATTAGAGCGAACG.1	0.0104227	1.30017e-10	5.52573e-10	0.00368016	3.09434e-09	0.840889	5.46823e-10	0.145009	3.17559e-10	3.51412e-10
nodule	donor3_2.GTCCCGCGACGTTATG.1	0.00805892	3.72189e-09	0.0530377	0.00494304	1.32858e-09	0.932147	4.58935e-09	0.00181337	1.76852e-09	7.41832e-09
nodule	donor3_2.GTTACTTTGGGCCTAG.1	1.02988e-09	1.34804e-09	1.63466e-08	0.0381771	2.3753e-09	0.657034	0.0251121	0.279676	1.03267e-09	3.06933e-09
nodule	donor3_2.GTTCACAGGAGTCTAG.1	1.19815e-08	0.0341824	2.75191e-08	1.02421e-08	2.02061e-08	0.769487	2.23828e-08	0.196331	1.41029e-08	1.69354e-08
nodule	donor3_2.GTTGAGTCCCGCCGGT.1	8.64173e-10	0.0159496	0.0173947	0.00852317	2.08344e-09	0.837222	0.04676	0.0369454	1.00618e-08	0.0372054
nodule	donor3_2.GTTGGATTGAGAACAC.1	1.64336e-07	6.25837e-08	6.96711e-08	0.0507512	5.77345e-08	0.70162	0.0402223	0.207405	3.3359e-08	4.82464e-07
nodule	donor3_2.TAAAGCGTTAGGAGAA.1	7.91609e-09	4.85987e-09	3.40285e-08	0.00370965	1.38879e-08	0.804698	0.0577389	0.133853	1.40346e-08	1.13201e-08
nodule	donor3_2.TAGGTGCTCGCCTAGC.1	1.60161e-07	9.07708e-08	8.73234e-07	0.00255629	9.99379e-08	0.887048	3.96025e-07	0.110394	2.55644e-07	1.19168e-07
nodule	donor3_2.TCCAGAGCACCGGTTC.1	9.09446e-09	0.0262913	0.0641219	0.0614958	1.42992e-08	0.639523	3.32604e-08	0.194179	0.0143891	3.37075e-08
nodule	donor3_2.TCCCGTCAGTCCCGCA.1	7.00263e-09	3.67962e-09	8.13763e-09	3.17385e-09	2.82376e-09	0.894369	0.0253096	0.0803213	3.87558e-09	5.44363e-09
nodule	donor3_2.TCCCTTAGATTACTCG.1	0.00195587	0.0336416	8.82129e-08	0.0172603	1.34858e-08	0.771607	0.0474173	0.128118	2.32778e-08	2.27757e-08
nodule	donor3_2.TCCGATGGTGCGACAT.1	6.27982e-08	0.0218922	1.2764e-07	6.36891e-08	0.0345757	0.854772	4.14869e-07	0.0520107	0.0367489	9.09806e-08
nodule	donor3_2.TCCTCTACGAGATGGC.1	4.44748e-10	0.00281785	0.00404156	0.0145758	7.71231e-10	0.809929	0.0729307	0.0957052	2.32066e-09	9.15094e-10
nodule	donor3_2.TGATTCGTCTATCACT.1	0.0107125	0.0184716	0.00934032	0.0605123	0.0189448	0.632035	2.06225e-07	0.249983	3.43854e-07	2.91505e-07
nodule	donor3_2.TGCAAGAATGACGTAA.1	1.54529e-08	0.0620748	1.69562e-07	0.0274008	0.045232	0.675221	0.054963	0.135108	4.19678e-08	6.28229e-08
nodule	donor3_2.TGCAGGATCGGCAAAG.1	1.26076e-09	4.3691e-10	7.18594e-10	0.00825675	4.74982e-10	0.708926	1.32979e-08	0.282818	2.40056e-09	1.15483e-09
nodule	donor3_2.TGCTCGGCGAAACCCA.1	0.00950781	4.89704e-08	1.55665e-07	9.29653e-08	1.42888e-07	0.96353	0.0127062	0.00777091	7.04927e-08	0.00648455
nodule	donor3_2.TGCTGGTTGGACAATT.1	8.01986e-07	1.96995e-07	0.0359701	1.42222e-07	0.0614195	0.729642	2.48683e-06	0.0623373	0.110627	4.40743e-07
nodule	donor3_2.TGCTGTTGAAGAACTC.1	0.000126838	2.9286e-05	0.0433706	0.00033078	0.015079	0.6148	0.00545716	0.320573	5.23585e-05	0.000181218
nodule	donor3_2.TGGACTGTTCGCTCAA.1	1.85327e-09	8.81876e-10	2.00602e-09	0.0136252	0.0373712	0.661125	0.135883	0.151995	8.53587e-10	1.11598e-08
nodule	donor3_2.TGTTATTGTATGTGGC.1	0.00521268	1.64358e-07	1.53205e-07	0.0408615	0.0596543	0.726959	0.0850042	0.0820829	2.82229e-08	0.000224617
nodule	donor3_2.TGTTCTTCCATTGACT.1	1.19492e-08	0.00558701	1.88402e-08	1.31611e-08	2.42946e-08	0.89828	0.0174367	0.0786966	3.02059e-08	7.09177e-08
nodule	donor3_2.TTACAGACCTAAATGA.1	0.00564365	2.56255e-07	5.75716e-07	0.0177351	1.60306e-07	0.607005	0.276559	0.0732691	0.0197865	6.6632e-07
nodule	donor3_2.TTACCATTGATTACCC.1	0.00871435	5.57607e-10	1.07057e-09	0.0181593	2.98959e-09	0.777099	1.07172e-08	0.196027	4.99037e-10	1.70834e-09
nodule	donor3_2.TTATCTGTATCATAAC.1	0.00682253	2.67455e-07	3.92367e-07	0.0126335	0.00217794	0.779875	0.0378681	0.157065	4.95751e-07	0.00355663
nodule	donor3_2.TTCCTCGGACTAACCA.1	4.34557e-08	2.44769e-08	1.8832e-07	0.00440547	5.05982e-08	0.829117	0.0252957	0.117832	3.75345e-08	0.0233493
nodule	donor3_2.TTCGACGGGAAGGGCG.1	5.47011e-09	1.18789e-08	2.62727e-09	1.97002e-09	2.15157e-09	0.927937	2.9622e-09	0.0720625	2.20212e-09	2.13002e-09
nodule	donor3_2.TTCGCACTCGCGTGCT.1	0.000135975	0.00352026	1.23418e-06	7.66172e-07	6.13374e-07	0.87767	9.11419e-07	0.0720856	0.0465838	6.94612e-07
nodule	donor3_2.TTGCTGAAGGAACCAC.1	1.13646e-09	7.3899e-10	1.2529e-09	0.0192252	2.325e-09	0.889561	0.013602	0.077612	6.54871e-10	1.70616e-09
nodule	donor3_2.TTGCTGATCATGTTCG.1	1.48571e-07	0.0787093	0.0438078	0.0139578	0.00601315	0.683462	0.0156848	0.158364	7.12158e-07	2.18335e-07
nodule	donor3_3.AAACTCGGTTCGCAAT.1	0.00518305	0.0236412	1.23294e-08	9.07586e-09	8.03219e-09	0.941704	1.73885e-08	0.0230667	0.00640477	2.24593e-08
nodule	donor3_3.AACGATAATGCCGTAG.1	3.94678e-08	7.33053e-08	1.94262e-07	0.00698677	8.85323e-08	0.673543	0.110729	0.20874	1.58518e-07	1.07451e-07
nodule	donor3_3.AACGCGGTCTCCAGCC.1	0.0130004	0.0370547	1.04206e-07	1.64884e-08	0.0197315	0.690037	1.72116e-07	0.240175	7.71437e-07	5.85189e-07
nodule	donor3_3.AAGCGCAGGGCTTTGA.1	5.11572e-08	0.0110251	4.18571e-08	0.024427	1.13028e-08	0.807243	3.03082e-08	0.157304	5.99627e-08	2.15658e-08
nodule	donor3_3.AATCGCCTCAGCGCCA.1	5.15817e-10	5.55847e-09	4.32703e-09	0.0301627	0.0217765	0.600214	8.19385e-09	0.330824	0.00688971	0.0101335
nodule	donor3_3.ACATTAGTTTATATCC.1	0.00156933	0.000415649	0.0842799	0.0192631	1.38179e-09	0.783542	0.0374045	0.0735259	1.52378e-09	1.65876e-09
nodule	donor3_3.ACTCCCTAGAATAGTA.1	8.46637e-10	0.0132148	1.17528e-09	8.16717e-10	1.07828e-08	0.936881	0.0207318	0.0102105	0.0189615	3.47528e-09
nodule	donor3_3.ACTCTCTGACTTAGGT.1	7.64018e-10	0.00643665	5.232e-09	1.60301e-09	0.0227396	0.672086	0.125609	0.173129	5.55259e-08	1.5754e-08
nodule	donor3_3.ACTGAATGGCGAAAGT.1	0.00503468	0.200804	1.54162e-06	4.98528e-08	1.7601e-08	0.531054	2.71148e-08	1.00421e-07	0.263106	6.41806e-08
nodule	donor3_3.ACTTCGCCATACGCAC.1	1.86577e-09	1.27676e-10	6.20084e-10	0.00648791	4.14946e-10	0.895392	5.05016e-10	0.0981203	3.78285e-10	5.74266e-09
nodule	donor3_3.AGCAACATATCTTATT.1	4.69318e-07	0.0250926	7.99405e-06	4.99055e-07	0.0648703	0.810352	0.00234124	0.071083	0.00488151	0.0213702
nodule	donor3_3.AGCCCGGTAGCCTGTA.1	3.47634e-09	3.07262e-09	4.35818e-09	0.0576281	4.93852e-09	0.643232	5.71993e-09	0.29914	2.24858e-09	7.39231e-09
nodule	donor3_3.AGGCAGGGAGCGTACT.1	7.98918e-10	0.0166379	6.16581e-09	0.0229064	0.0602981	0.619356	0.0264346	0.253382	1.26538e-09	0.000984461
nodule	donor3_3.AGGGCGTGATCGGCTA.1	1.85576e-07	2.79986e-07	1.63422e-06	8.15792e-07	4.77169e-07	0.870246	0.0069268	0.122823	2.26278e-07	4.15096e-07
nodule	donor3_3.AGGTTTCACACACCTT.1	1.32055e-07	2.03333e-07	2.8814e-07	0.00254818	0.00236949	0.670325	0.0954444	0.229178	0.000134558	2.25245e-07
nodule	donor3_3.AGTTAAGCGGTCCCGG.1	0.00498037	0.00593892	3.44884e-07	1.42847e-06	4.68071e-08	0.892026	3.85601e-07	0.0970525	8.92545e-08	3.52625e-07
nodule	donor3_3.ATAGTGAAGCGTTCTC.1	1.34671e-09	9.21801e-10	2.8076e-09	0.00706464	1.35542e-09	0.841357	1.25888e-08	0.151579	1.80456e-09	2.91301e-09
nodule	donor3_3.ATATCAACCTACAGAG.1	0.00393722	5.8456e-09	7.49157e-09	5.49393e-08	3.01093e-09	0.933203	0.0158032	0.0470564	6.91457e-09	7.84694e-09
nodule	donor3_3.ATATTCAGTTAAACCT.1	9.77002e-10	7.11989e-10	1.56402e-09	0.00344672	1.66036e-09	0.882221	5.48609e-09	0.114332	9.65412e-10	1.50299e-09
nodule	donor3_3.ATCCAGAGCAACAACC.1	7.28644e-09	2.0703e-08	1.02286e-08	0.0363733	0.00607814	0.761379	0.0655936	0.130576	1.77125e-08	9.45826e-09
nodule	donor3_3.ATCTAGCTTGTGAGGG.1	4.29397e-08	7.22415e-09	2.38742e-08	0.0586773	1.47716e-08	0.803312	3.95672e-08	0.138011	1.29819e-08	2.10961e-08
nodule	donor3_3.ATGGATCCGGCGTCCG.1	1.30367e-08	6.24746e-09	5.04375e-08	0.00347565	0.00161836	0.850891	0.0189672	0.109134	1.14304e-08	0.0159137
nodule	donor3_3.ATTTGTCTTGGGAGCT.1	5.4437e-09	0.0241599	4.09612e-08	0.00938169	9.69981e-09	0.714795	0.074167	0.177494	2.46624e-06	3.7501e-08
nodule	donor3_3.CAAAGATTATTGGGCC.1	0.00490224	2.2511e-09	2.91958e-09	0.04646	4.98605e-09	0.893655	0.0058564	0.0491213	4.84208e-06	4.82865e-09
nodule	donor3_3.CAAGCGGCACATAATT.1	5.12338e-08	6.14244e-08	1.36855e-07	0.00126361	0.0049445	0.8009	2.00294e-07	0.181774	0.0111181	2.35445e-07
nodule	donor3_3.CACACGCGCTGTCTTA.1	3.21477e-09	1.33048e-09	1.58997e-09	6.29455e-09	0.0031322	0.514541	5.04613e-09	0.449955	9.18856e-10	0.032372
nodule	donor3_3.CACCCACGAGGCAATT.1	2.69325e-08	1.23367e-09	3.46292e-09	0.00506148	1.86649e-09	0.83181	6.54656e-08	0.163129	3.1436e-09	4.72875e-09
nodule	donor3_3.CACCTAATCAGTTTAC.1	6.11168e-07	4.24795e-08	0.0447281	3.87669e-08	0.0218601	0.450375	0.119164	0.334077	8.31272e-08	0.0297954
nodule	donor3_3.CACTGACGATTGTGGA.1	2.08148e-07	0.0702776	0.222902	0.034171	1.18184e-07	0.587584	1.34195e-07	0.0279847	0.0570807	1.74111e-07
nodule	donor3_3.CAGAGGCGATGCATGA.1	8.15312e-08	0.00388292	2.01365e-07	0.0427175	1.02075e-07	0.770796	0.045135	0.128241	0.00922692	6.43956e-07
nodule	donor3_3.CAGCGATTCCCTTCAA.1	2.1161e-09	0.0295264	5.59749e-09	1.09589e-09	4.29479e-10	0.922983	3.01455e-09	0.047491	1.6412e-09	3.92312e-09
nodule	donor3_3.CAGCTCACTGAGACAT.1	8.93969e-10	9.4469e-10	1.55351e-08	0.00744799	1.92942e-09	0.644019	3.02492e-09	0.263268	0.0212637	0.064001
nodule	donor3_3.CATCTTACACCACCTC.1	0.00599813	2.21522e-10	5.62521e-10	6.71119e-10	5.84187e-10	0.810854	1.5122e-09	0.183148	2.64859e-10	1.18397e-09
nodule	donor3_3.CCAATTGAATGTTAAT.1	9.12036e-10	2.14612e-10	9.7636e-10	0.0254396	4.34753e-10	0.87707	2.38337e-07	0.0974906	4.88999e-10	1.18861e-09
nodule	donor3_3.CCATTTCTACCTATTA.1	0.00354302	0.0950422	0.0326291	0.00927147	5.97785e-08	0.837179	2.23903e-07	0.0223348	1.21732e-07	7.76716e-08
nodule	donor3_3.CCCAACATACGTCGCG.1	2.03998e-08	0.105424	1.13338e-05	2.33431e-08	1.41289e-08	0.747621	5.39791e-08	0.0515623	0.0953813	2.95929e-08
nodule	donor3_3.CCCGACCATAGTCCGC.1	8.33122e-08	0.0172251	3.50505e-07	0.000762039	7.32847e-06	0.756973	0.116892	0.108139	2.07242e-07	5.32952e-07
nodule	donor3_3.CCGAACCTTCCCGGCC.1	2.27702e-06	0.0178893	0.0571616	6.24135e-06	0.0683164	0.738602	1.05062e-05	0.117995	3.95323e-06	1.32062e-05
nodule	donor3_3.CCGCTTACCTCACTCT.1	4.13196e-09	0.00777055	7.62625e-09	0.026708	4.75103e-08	0.776076	0.00565466	0.153805	0.000996643	0.0289894
nodule	donor3_3.CCTCTATCGATTAGCA.1	4.14366e-08	2.46794e-08	4.82777e-08	0.0638875	0.0165445	0.635625	1.18212e-07	0.17994	0.0212809	0.0827223
nodule	donor3_3.CCTGCTATTTGAGAAG.1	0.000576606	2.5402e-10	1.9478e-09	5.94216e-10	5.17068e-10	0.909387	0.026047	0.0639897	3.88487e-10	1.18482e-09
nodule	donor3_3.CCTTCTTGATCCAGTG.1	1.51304e-07	2.53594e-08	5.71168e-08	3.77369e-07	5.71261e-08	0.546637	0.164656	0.288706	3.35681e-08	6.44398e-08
nodule	donor3_3.CGCGCATGTTTGATTG.1	7.50097e-07	2.69059e-08	6.482e-08	0.0127691	1.44024e-07	0.833451	0.0204765	0.133302	5.3294e-08	1.17458e-07
nodule	donor3_3.CGCTATTCTTAGGCTC.1	3.57039e-10	0.00675408	2.02476e-09	0.00436054	1.24944e-09	0.883432	1.3945e-09	0.101062	0.00439091	1.20576e-09
nodule	donor3_3.CGGAAAGAATCAAACG.1	6.66863e-08	4.34753e-08	1.96242e-08	5.81962e-08	9.35322e-09	0.887616	3.95326e-08	0.112384	1.26574e-08	3.02517e-08
nodule	donor3_3.CGGTACTAGAATCAAA.1	1.87264e-06	0.0120851	4.58243e-07	2.2938e-07	1.65007e-07	0.824892	4.87365e-07	0.163018	8.29226e-07	5.1346e-07
nodule	donor3_3.CGTCGTCCTTCGCGAA.1	6.96013e-07	2.91976e-07	3.3395e-06	0.0176213	0.00691674	0.684017	4.22526e-06	0.246745	0.00450541	0.0401867
nodule	donor3_3.CGTGCCCTCCCGAAGA.1	9.48302e-09	0.00750174	2.42843e-08	3.79117e-09	1.91262e-09	0.825288	0.00743805	0.159772	3.55327e-09	7.70909e-09
nodule	donor3_3.CGTTGTCGGCAATTGA.1	6.60396e-08	0.0191387	9.92201e-06	0.0126449	1.22925e-07	0.878681	0.0280869	0.0614371	3.43069e-07	4.20658e-07
nodule	donor3_3.CTCACTTGGCTGGTAA.1	0.0164885	4.87361e-08	1.45826e-07	0.0439469	9.25452e-08	0.793738	0.0135664	0.132257	9.15974e-08	2.24562e-06
nodule	donor3_3.CTCCGCCCACATGAGG.1	2.53619e-06	3.49388e-08	0.239697	0.142773	0.047478	0.214058	0.052305	0.298235	5.32756e-07	0.00544953
nodule	donor3_3.CTCCTCCAGCTCACAC.1	3.8369e-07	3.62734e-07	1.4782e-06	0.0280498	0.00153123	0.916517	0.0509662	0.00293126	7.53639e-07	1.62939e-06
nodule	donor3_3.CTGCACCTGGAACCGC.1	0.00435677	0.0429977	0.0846928	0.0382762	6.72023e-10	0.668123	1.03541e-09	0.152437	1.70293e-09	0.00911677
nodule	donor3_3.CTTCTATTAATGCTAG.1	2.17678e-08	3.86108e-08	5.4199e-07	0.0220851	0.0400913	0.751752	0.0157816	0.166068	6.73868e-08	0.00422132
nodule	donor3_3.CTTCTTACGTCGTATA.1	8.83652e-09	3.11454e-09	1.01017e-08	1.48129e-08	6.51378e-09	0.902745	0.0173941	0.0798607	8.65188e-09	8.54875e-09
nodule	donor3_3.CTTTAACTTTCAAAGG.1	2.40897e-08	1.64034e-08	5.23986e-08	0.000597482	0.0421156	0.639143	0.028067	0.290076	1.53589e-08	5.66789e-07
nodule	donor3_3.GAATGTTGGGTAATCT.1	0.010478	1.07052e-09	1.50447e-09	7.82357e-10	5.0126e-09	0.85474	6.29756e-09	0.134782	7.01233e-10	1.53923e-09
nodule	donor3_3.GAGATCTGCTTGGCAT.1	8.52898e-06	5.71789e-08	2.47765e-07	1.14494e-07	6.02206e-08	0.961714	2.75899e-07	0.037644	1.64626e-07	0.000632725
nodule	donor3_3.GCATGAGGGACGCGGC.1	5.8481e-08	0.00868885	2.45065e-08	0.0183976	4.20604e-09	0.677736	2.03479e-08	0.295177	6.85175e-09	4.16264e-08
nodule	donor3_3.GGCGGTAGGATCATTG.1	0.00415296	1.86253e-09	4.03644e-09	3.61671e-09	4.21796e-09	0.937617	7.55697e-08	0.0582297	1.70498e-09	3.02893e-09
nodule	donor3_3.GGCTCGCGTTGAGGTA.1	1.5868e-07	2.06447e-07	2.66111e-07	1.24455e-06	1.21133e-07	0.868718	6.31492e-07	0.131279	1.07679e-07	1.76392e-07
nodule	donor3_3.GGCTGAAATAGCAAAG.1	6.25482e-09	7.55465e-09	1.51276e-08	1.53654e-08	6.93986e-09	0.975734	1.59752e-05	0.0211898	1.00077e-08	0.00306046
nodule	donor3_3.GGTTACCACCCTCGGG.1	1.80332e-09	0.013738	0.0665031	0.0575465	0.0144891	0.583674	5.86621e-09	0.204312	0.0597369	1.31742e-09
nodule	donor3_3.GTAGAGGGAGACAAGT.1	0.0246157	4.89828e-08	8.67215e-09	0.0444023	0.00925752	0.792301	0.0252901	0.104133	1.52329e-09	1.77746e-09
nodule	donor3_3.GTAGGTGATCCGTGTA.1	0.00493065	0.000832663	1.69444e-07	8.31586e-08	1.12273e-07	0.922188	2.0777e-07	0.0720477	5.90183e-08	2.46738e-07
nodule	donor3_3.GTCATGGACATGACTA.1	1.46227e-08	0.091936	5.63306e-08	1.83695e-08	2.34128e-08	0.748403	3.8758e-08	0.15966	2.98993e-08	2.07728e-08
nodule	donor3_3.GTGGAGTCGGCGGTTG.1	0.00453127	1.73457e-07	9.92548e-08	0.00210874	7.20753e-06	0.865901	0.0368021	0.0906471	4.22774e-08	2.49994e-06
nodule	donor3_3.GTGTCGTATAGCGTTC.1	0.0198853	3.64464e-07	1.49203e-06	3.86882e-07	7.52168e-05	0.887685	1.69029e-06	0.0768293	1.84583e-07	0.0155214
nodule	donor3_3.GTGTGAATAACTTAGG.1	3.0053e-06	9.8868e-07	8.87701e-06	0.0309691	1.48952e-06	0.835804	0.00272613	0.130483	2.57649e-06	1.62302e-06
nodule	donor3_3.GTTAACATCACTTAAA.1	5.61403e-10	0.0473607	0.212176	3.70567e-10	1.77731e-10	0.694864	2.73335e-09	0.0456002	1.29043e-09	3.73718e-10
nodule	donor3_3.GTTTGGCCCAAGTTAT.1	1.8923e-10	9.8363e-11	2.26531e-10	0.0140992	2.04525e-10	0.870034	1.21197e-09	0.115867	1.27129e-10	4.25716e-10
nodule	donor3_3.TAACATACACGCGATC.1	0.0115052	8.89783e-10	2.30496e-09	0.0173049	1.35859e-09	0.952069	2.05086e-08	0.0191211	1.78248e-09	4.08165e-09
nodule	donor3_3.TAATAGTGACGACCAG.1	0.00659472	3.29347e-08	1.185e-07	1.11078e-07	9.72035e-08	0.816156	0.0524505	0.124799	4.82959e-08	1.22145e-07
nodule	donor3_3.TACGACGCTTGCTGCG.1	1.26454e-07	1.08316e-08	3.18479e-08	4.93195e-08	4.24685e-08	0.703738	0.0747153	0.217379	1.87013e-08	0.00416684
nodule	donor3_3.TAGCCGGCGGTCAGCG.1	4.3632e-09	3.64743e-10	2.30909e-09	0.0133033	5.85075e-10	0.692936	0.0512446	0.242516	4.5822e-10	3.04025e-09
nodule	donor3_3.TAGGTGCTCGCCTAGC.1	7.59743e-10	0.00736973	2.60546e-09	1.02473e-09	7.71207e-10	0.78918	1.37037e-09	0.20345	1.68624e-09	8.21476e-10
nodule	donor3_3.TATGGTCTGAGTAACA.1	6.72993e-08	1.16877e-08	1.36932e-08	0.000862845	0.000899606	0.882723	0.0264764	0.0890376	1.12572e-08	2.35869e-08
nodule	donor3_3.TCACCGCTCGGCACTC.1	8.85729e-05	5.70509e-05	0.000132598	0.0146845	4.88633e-05	0.698144	0.000112918	0.286579	7.22638e-05	8.05029e-05
nodule	donor3_3.TCAGTAGGGACTATAA.1	4.76168e-09	4.94787e-09	1.01114e-08	0.0321593	0.0148782	0.827598	0.00917575	0.112328	0.00386091	3.72866e-09
nodule	donor3_3.TCCGCTGTCATCCCGG.1	9.35256e-09	3.70559e-09	1.74182e-08	4.83133e-09	0.00368334	0.834815	0.0707052	0.0737383	8.49109e-09	0.0170578
nodule	donor3_3.TCCGGTTCGTCCGGTC.1	4.12068e-08	0.0696737	2.5517e-07	3.4199e-08	0.0702275	0.534636	1.52826e-06	0.0919467	0.233514	8.03249e-08
nodule	donor3_3.TCGTAAGACGACATTG.1	5.93097e-09	1.25136e-09	0.0331014	0.00474795	1.05999e-09	0.718103	0.116519	0.127528	9.29157e-10	2.3928e-09
nodule	donor3_3.TCTGTGCCATCATAGT.1	1.56657e-08	9.02367e-09	8.41969e-09	1.05099e-08	1.05246e-08	0.785598	0.108842	0.105559	6.47498e-09	7.82649e-09
nodule	donor3_3.TCTTGGTAACACCAAA.1	0.00270006	0.0455504	2.9957e-08	1.08016e-08	0.0254312	0.716607	0.0519038	0.154843	0.00296465	2.91345e-08
nodule	donor3_3.TGAATGAGTGTTTCCC.1	3.40313e-07	0.116156	0.0867109	2.68868e-07	1.28929e-07	0.493006	2.50265e-07	2.21035e-07	0.304125	3.02557e-07
nodule	donor3_3.TGCAGAACTATATCGT.1	4.54366e-08	2.63427e-08	4.74444e-08	7.46011e-08	3.27794e-08	0.933854	5.94462e-08	0.0661458	3.30721e-08	4.12028e-08
nodule	donor3_3.TGCTCCACAGTTCTTA.1	5.35808e-08	0.00109398	2.89874e-08	0.00773877	2.96749e-08	0.917519	6.36639e-08	0.0736479	2.72984e-08	4.81795e-08
nodule	donor3_3.TGGCCGTATATTGACC.1	1.98976e-08	0.119594	0.263257	0.0520452	2.09339e-08	0.528357	6.49119e-08	0.0264096	4.09787e-08	0.0103368
nodule	donor3_3.TGTATGGCGCAGACAG.1	0.00942084	0.00540463	3.0854e-09	1.59596e-09	1.72484e-08	0.752921	0.0124298	0.17727	0.0425534	1.02558e-08
nodule	donor3_3.TTAGACGAGTCACCTC.1	5.15174e-09	3.12806e-09	7.48438e-09	2.48972e-08	5.95464e-09	0.791779	0.0566587	0.145723	5.1026e-09	0.0058393
nodule	donor3_3.TTATCTGTATCATAAC.1	9.95541e-09	0.00833708	8.14347e-08	2.24895e-08	0.0220481	0.724512	0.0889853	0.148358	0.00153359	0.00622562
nodule	donor3_3.TTCGCGCGCCATACGA.1	2.1161e-08	0.0257981	2.7515e-07	0.0438222	0.00743124	0.675453	1.62066e-07	0.24002	2.85021e-08	0.007475
nodule	donor3_3.TTCGGGCGCTAGTCTT.1	1.55596e-08	1.10661e-07	4.66986e-08	0.0185217	2.37573e-08	0.858932	5.92598e-08	0.105807	5.4408e-08	0.0167394
nodule	donor3_3.TTCTAACCGAAGCTTA.1	0.0127526	1.21352e-06	0.0007881	9.64896e-07	0.0117608	0.91396	0.0597859	2.51812e-05	1.05997e-06	0.000924548
nodule	donor3_3.TTCTGCCGCGCCTAGA.1	1.49572e-09	0.0477385	0.0500638	0.037135	2.22443e-09	0.469568	2.54525e-09	0.376455	0.01904	3.8198e-09
nodule	donor3_3.TTGGGAAGACGAGCCG.1	0.0100297	0.0212233	1.28925e-09	0.0151706	1.05708e-09	0.824671	0.00601379	0.122892	1.165e-09	3.36343e-08
nodule	donor3_3.TTGTTTCACATCCAGG.1	0.00212011	2.19803e-09	7.18161e-09	8.17863e-09	4.7555e-09	0.907008	0.0329231	0.0296991	3.09456e-09	0.0282496
nodule	donor1_1.AAACGAGACGGTTGAT.1	0.00179921	0.00523875	0.0990714	3.53673e-09	1.39194e-09	0.734883	2.15898e-08	0.146652	1.10658e-08	0.0123556
nodule	donor1_1.AATGTGCTAATCTGAG.1	0.0140088	1.65804e-08	0.0184395	0.026912	7.83897e-10	0.94064	2.78252e-09	1.54346e-09	3.06271e-09	2.75115e-09
nodule	donor1_1.ACACACTTTCTACACG.1	3.15128e-08	3.09808e-08	6.50048e-08	0.0478175	6.76454e-08	0.772946	0.0340406	0.145195	2.36462e-08	3.03505e-07
[truncated: 39,410 more rows]

## Sheet: distribution_avg
spot_type	adipocytes	endothelial cells	fibroblasts	monocytes	MSchwann cells	neurons	NMSchwann cells	SGC	mural cells	T-cells
nearby_neuron	0.00183657	0.00519704	0.00511273	0.012005	0.00508447	0.861713	0.0182053	0.0864554	0.0016364	0.00275371
nodule	0.00316547	0.0199964	0.0248747	0.0188608	0.0141335	0.739234	0.0446756	0.116733	0.0116277	0.00669886
nodule_neuron	0.00201891	0.00633068	0.00722815	0.0154315	0.00537512	0.807151	0.0439079	0.105521	0.00200746	0.00502872
others	0.00640853	0.0184561	0.0500637	0.014081	0.0476743	0.788595	0.00925205	0.0383715	0.0221663	0.00493176

## Sheet: split_by_clustering
barcode	cluster	adipocytes	endothelial cells	fibroblasts	monocytes	MSchwann cells	neurons	NMSchwann cells	SGC	mural cells	T-cells
donor14_1.ATTCAGGACCTATTTC.1	0	0.0106429	0.0306865	0.0532863	2.22672e-09	0.0160184	0.711276	0.0702779	0.080925	0.0268866	1.6389e-09
donor14_1.CGAGTTCTGTCCCACC.1	0	0.00231622	0.0206527	0.00570302	1.08746e-06	1.37324e-07	0.794868	0.101838	0.0258575	2.00984e-07	0.0487638
donor14_1.CTCGATATTTGCGAGC.1	0	1.61577e-10	0.0105437	0.0151641	4.19206e-10	0.00895449	0.889749	0.0525353	0.0230533	5.06962e-10	3.50982e-10
donor14_1.GACACAAGGGAAGAAA.1	0	2.64185e-08	3.32986e-08	1.6906e-07	1.97159e-08	0.0325133	0.790459	0.158509	1.30461e-07	1.48135e-07	0.0185175
donor14_1.GCCAATAGGGCATCTC.1	0	0.00280694	2.7178e-07	2.16912e-07	0.00818153	0.00868998	0.839928	0.0941685	5.13866e-07	1.47316e-07	0.0462235
donor14_2.AGTCTTCTCCTCAAAT.1	0	3.07225e-09	4.70774e-08	0.146644	0.061814	2.66394e-09	0.650433	0.0340645	0.0836752	0.0233694	2.56653e-09
donor14_2.GCAACAGCAGTATGCG.1	0	0.00923802	0.0204464	0.039885	0.0181937	1.27124e-08	0.702539	0.0422256	0.153032	1.02992e-08	0.0144406
donor6_1.AAACATTTCCCGGATT.1	0	3.16117e-08	0.0298335	1.62758e-06	0.0162631	2.00953e-08	0.575219	0.118837	0.196515	0.0266759	0.0366544
donor6_1.AATCTGGCTTTCTAGT.1	0	9.58572e-09	0.00698817	0.00268288	0.126697	1.01827e-08	0.527754	0.180338	0.15554	8.94131e-09	7.4782e-09
donor6_1.ACGCATTCGTGAGTAC.1	0	0.00069823	1.11713e-08	0.030431	5.51924e-09	9.13722e-09	0.560124	0.127009	0.277043	8.15917e-09	0.00469348
donor6_1.AGACCGGGAAACCCTG.1	0	0.00779897	1.84339e-07	3.9217e-07	1.53402e-07	0.0370606	0.702529	0.0707557	0.171696	1.00542e-06	0.0101583
donor6_1.AGCAACCGAAAGTAAT.1	0	5.35887e-10	0.095867	0.0500309	1.89181e-09	3.68457e-09	0.622283	1.54475e-09	0.23182	1.06451e-09	8.97127e-10
donor6_1.AGTACTCTTATGCCCA.1	0	1.01362e-08	0.049015	0.0383393	6.08464e-08	0.0260959	0.571591	0.312272	0.00266759	1.72463e-08	1.92298e-05
donor6_1.AGTCACTAGCTCTCGA.1	0	4.88274e-07	7.54325e-05	0.00157075	0.0546725	9.89551e-07	0.679734	0.213595	0.0503486	6.89594e-07	9.70974e-07
donor6_1.AGTTTGGCACGGGTTG.1	0	0.0148002	2.02666e-07	0.129338	0.134256	0.0496898	0.366453	0.123245	0.104623	0.00109908	0.0764963
donor6_1.ATCTGGGCTGTTCTTG.1	0	0.0152503	6.74756e-08	1.50478e-07	0.0659386	0.0648667	0.544943	2.81469e-07	0.309	6.02068e-08	2.94736e-07
donor6_1.CAAAGATTATTGGGCC.1	0	1.87228e-08	4.41906e-09	0.0772662	0.00749071	0.132277	0.451392	4.37748e-08	0.326907	0.00466754	1.03243e-08
donor6_1.CAAATCTCTCACAAGG.1	0	0.00854782	4.7678e-09	7.55576e-08	5.88992e-08	7.59906e-09	0.636788	0.180871	0.173793	3.18023e-09	1.51699e-08
donor6_1.CAATGCGAGAAGTATC.1	0	0.000333886	9.82827e-09	0.0438481	0.0438389	1.58113e-08	0.515612	0.236399	0.118724	6.01978e-09	0.0412433
donor6_1.CACACACGCTAACGAG.1	0	5.24022e-08	1.36644e-06	0.0253278	0.0751181	1.34533e-07	0.613352	0.110564	0.162772	0.00719423	0.00567108
donor6_1.CACCCTTGGTGAGACC.1	0	3.34559e-09	0.0472641	2.22803e-07	5.72453e-09	1.86616e-08	0.469423	0.298031	0.185282	5.26761e-09	1.77883e-08
donor6_1.CACTCTCAAGCATCGA.1	0	4.33343e-08	4.6884e-08	0.0891213	1.91309e-08	1.05564e-08	0.744763	1.52827e-07	0.166113	1.92218e-06	3.573e-08
donor6_1.CAGTTCGAGGACCCGA.1	0	4.97197e-09	0.0369391	4.89354e-08	5.3899e-09	0.0103594	0.639826	0.0544472	0.250647	0.0077816	8.20835e-09
donor6_1.CCATTAGCGATAATCC.1	0	8.23843e-09	9.874e-09	0.0316414	3.04916e-08	0.0290187	0.703437	0.00403227	0.23187	6.72404e-09	7.2339e-08
donor6_1.CCGCACGTGACCTCGG.1	0	4.49002e-10	5.9896e-10	9.26848e-10	1.81577e-09	4.95441e-10	0.528066	1.30588e-09	0.471934	5.42602e-10	1.116e-09
donor6_1.CGGTGCAGATAGAACG.1	0	7.19983e-08	0.00178036	7.07748e-08	0.0844399	1.96266e-08	0.311921	3.84474e-08	0.601858	1.27718e-08	2.25274e-08
donor6_1.CGTCACGTCCATTGGT.1	0	0.0220722	0.0232634	0.0659277	0.0234899	0.0559402	0.502676	0.30566	2.2352e-07	0.000969789	1.2527e-08
donor6_1.CTAACGAAACTTGCTG.1	0	0.0216444	0.0252416	0.130655	0.036065	0.04564	0.550191	0.0369139	0.140468	1.70156e-08	0.0131811
donor6_1.CTACTCAAGGTATAGT.1	0	1.08482e-07	4.72846e-08	6.4217e-07	2.71284e-08	6.89015e-08	0.76885	0.112463	0.118685	1.13225e-06	5.43807e-08
donor6_1.CTCTTCTATTGACTGG.1	0	0.0171605	2.91744e-08	0.0916473	0.046102	0.0363785	0.600478	0.0496713	0.151751	2.72658e-07	0.00681067
donor6_1.CTTGAGTTAGGGTAAT.1	0	0.00919337	0.00942884	3.73173e-07	0.124297	8.28157e-08	0.609654	0.136983	0.110444	3.50126e-08	8.88231e-08
donor6_1.GACGACGATCCGCGTT.1	0	0.00741686	1.38635e-10	3.39304e-10	0.0738178	4.47001e-09	0.721292	0.120384	0.0770892	1.6983e-10	3.43833e-10
donor6_1.GAGCGGAATGCGGTGT.1	0	7.69787e-05	2.41248e-09	0.00117907	0.0129174	0.0758442	0.727787	0.0304719	0.132714	0.01901	1.02465e-08
donor6_1.GAGGTACGCGTGTCCC.1	0	1.98064e-09	0.00239523	4.39198e-08	1.85791e-09	0.0765086	0.599063	0.139772	0.123023	0.0341529	0.0250848
donor6_1.GATAGAACCCGCTAGG.1	0	0.0494602	6.03714e-08	1.294e-07	0.0764708	0.0753642	0.263006	0.31159	0.224109	2.9869e-08	2.22705e-07
donor6_1.GCGAAACGATCGGGAG.1	0	1.07558e-07	0.000624071	7.03209e-07	0.0590611	1.51561e-07	0.665946	0.189866	0.084501	2.78794e-07	2.202e-07
donor6_1.GCTCTTTCCGCTAGTG.1	0	0.00338405	0.106641	0.0901687	0.0448322	0.00604461	0.511951	0.0927835	0.104109	0.0400852	2.55682e-09
donor6_1.GGACTCGACAGCGCAT.1	0	0.0511384	8.70243e-09	4.09243e-08	9.32455e-09	0.0804542	0.690214	0.178194	2.50319e-08	3.18325e-09	8.36448e-09
donor6_1.GGATTGCTGTGACTCC.1	0	2.87173e-08	1.04171e-08	0.00766442	0.0119208	0.0135118	0.649691	0.048962	0.253315	5.80266e-09	0.014935
donor6_1.GGGCAGGATTTCTGTG.1	0	2.70799e-07	0.0106619	0.0671266	0.0172728	0.0124106	0.674251	0.0738802	0.0899583	2.58821e-07	0.0544378
donor6_1.GGTGTAAATCGATTGT.1	0	2.30197e-06	0.0511736	2.67942e-06	0.008383	1.4219e-06	0.706955	0.0636242	0.169853	2.69254e-06	1.9586e-06
donor6_1.GTACGCTTCATTGCAC.1	0	5.52426e-09	4.32269e-09	5.9816e-09	0.0628621	0.0108482	0.781645	0.102388	0.0422571	4.68793e-09	1.06558e-08
donor6_1.TAAGGCTGAATCCCTC.1	0	0.0102996	0.0125302	1.47575e-08	0.0257057	8.72016e-10	0.694787	0.116304	0.140373	1.93656e-09	1.04284e-08
donor6_1.TAATTACGTCAGTAGA.1	0	2.20582e-08	4.07004e-09	0.0255041	0.102402	8.54165e-07	0.462164	0.219065	0.162641	1.62645e-08	0.0282223
donor6_1.TACAGAAACGGTGGGC.1	0	4.00696e-10	1.44823e-08	0.0742492	7.2009e-09	2.55531e-09	0.545392	0.104587	0.275771	9.67914e-10	1.71894e-09
donor6_1.TAGGTCCAAGTAAGGA.1	0	1.82623e-10	0.00476146	9.64138e-10	7.64998e-10	0.00791973	0.524274	0.0869711	0.345982	1.91276e-10	0.0300918
donor6_1.TCGGAGAGTATCGGGA.1	0	4.96621e-07	0.069173	1.13406e-06	0.0390047	0.00808777	0.594503	0.289227	5.13642e-07	8.7173e-07	2.11723e-06
donor6_1.TCGTCAAGTACGCGCA.1	0	2.49317e-09	1.98568e-08	4.39087e-09	0.0284008	1.98123e-09	0.628976	0.134972	0.207651	1.48709e-08	3.01196e-09
donor6_1.TCTAGTGATATCGTGG.1	0	4.90738e-07	1.63958e-07	0.00972759	0.0448999	4.05465e-08	0.763547	0.105485	0.075639	0.0007005	2.93357e-07
donor6_1.TCTGAAGCACGTGGTC.1	0	5.33637e-08	0.0399704	0.0599612	0.0593161	1.8483e-08	0.605391	0.12483	0.110532	2.4716e-08	8.48934e-08
donor6_1.TGAACAAGCAGGGACT.1	0	0.00312902	0.00784244	0.0998491	0.00998036	1.82893e-09	0.542664	0.20163	0.131556	1.50347e-09	0.00334862
donor6_1.TGGTTCAACGGGTAAT.1	0	2.0328e-09	2.67388e-09	0.0223382	0.0267972	0.0116779	0.714238	0.0684651	0.156483	2.49558e-09	1.80053e-09
donor6_1.TTCACTTCCTAGAACG.1	0	0.062551	6.73233e-07	0.0290859	0.0495299	0.024717	0.523535	0.246172	0.0644066	9.39123e-07	7.9845e-07
donor6_1.TTGATTATGCAGATGA.1	0	6.47955e-06	1.38259e-06	1.64434e-05	5.14576e-06	1.75994e-06	0.839559	3.38814e-06	0.160399	2.87684e-06	4.24173e-06
donor6_1.TTGGACCATCTGGCAA.1	0	1.31238e-07	6.23485e-09	6.06633e-08	0.00181932	6.14656e-08	0.641846	0.100254	0.25608	9.0602e-09	8.60267e-09
donor6_1.TTGGTCACACTCGTAA.1	0	0.0327988	0.0174534	0.0689621	0.0848376	0.0675513	0.524245	0.128888	0.0523852	0.0228778	6.02719e-07
donor6_2.AAACAAGTATCTCCCA.1	0	5.95012e-08	0.0885247	0.00618122	0.0120278	0.0697024	0.585029	0.214534	0.0224099	0.00159024	3.18125e-07
donor6_2.AAACCGGAAATGTTAA.1	0	9.96421e-09	0.0694009	0.0108725	0.0466831	0.0232688	0.515717	0.0807391	0.189876	2.00354e-09	0.063442
donor6_2.AAACCGTTCGTCCAGG.1	0	2.18045e-08	6.62801e-09	2.16205e-08	9.04419e-08	0.0417066	0.709826	0.165504	0.0804928	6.32958e-09	0.00247037
donor6_2.AAACTCGGTTCGCAAT.1	0	1.03636e-07	0.0398372	0.0501278	0.00743034	0.00909784	0.78237	6.31793e-07	0.0496649	0.0614716	1.92021e-07
donor6_2.AACAGGATGGGCCGCG.1	0	1.79084e-08	5.71412e-08	6.12576e-08	0.0533255	2.28175e-08	0.677523	0.00862472	0.260527	1.0975e-08	3.09234e-08
donor6_2.AACGCGACCTTGGGCG.1	0	0.0066233	8.678e-08	1.95301e-07	0.0654306	0.0442188	0.735719	0.0207182	0.0842521	8.87087e-08	0.0430371
donor6_2.AACTACCCGTTTGTCA.1	0	9.93475e-09	0.0447952	2.46793e-08	0.00197623	2.59365e-08	0.608545	0.0391671	0.239563	0.0659534	1.40403e-08
donor6_2.AAGTAGTGACGCGAGG.1	0	4.1768e-08	0.0134099	0.0336394	2.69156e-08	0.0601298	0.758428	2.59106e-06	0.13439	2.64324e-08	3.9418e-07
donor6_2.AAGTTCACTCCAAGCT.1	0	0.0117116	0.0109587	0.0243141	0.118693	2.05135e-09	0.245211	0.0582997	0.502458	0.0283535	2.98355e-09
donor6_2.ACCCTCCCTTGCTATT.1	0	0.0315339	0.0275853	7.60515e-09	0.0257155	0.0168217	0.591579	0.0601422	0.186258	9.79338e-09	0.060365
donor6_2.ACCGATAGGCATAACC.1	0	1.35221e-07	2.02853e-06	0.115483	0.0110512	3.28505e-07	0.529463	0.211712	0.104188	2.29916e-07	0.0280998
donor6_2.ACCTACTATAAATCTA.1	0	2.09604e-09	0.151806	0.157857	0.00641947	0.00589557	0.495637	0.0933967	0.0888899	9.77421e-05	2.63481e-08
donor6_2.ACGAAATGGGCGGCAC.1	0	6.0113e-10	0.0701362	1.77102e-09	9.00713e-10	0.00119657	0.632641	0.0686011	0.227425	2.7567e-09	1.35586e-09
donor6_2.ACGAGTACGGATGCCC.1	0	4.37657e-09	0.0773792	4.18374e-08	0.0547761	3.71955e-09	0.537731	0.151418	0.178695	7.06291e-09	2.81312e-09
donor6_2.ACGCAAACTAATAGAT.1	0	0.0144842	0.0216402	0.0729967	0.0302293	0.0233853	0.464153	0.140753	0.15273	1.46142e-07	0.0796286
donor6_2.ACTCCCGAATTCGTTT.1	0	7.41383e-08	0.0343642	0.0324281	3.73714e-08	3.18784e-07	0.685461	0.079563	0.168182	4.19489e-07	9.55558e-08
donor6_2.AGACTGTTACCGGGTC.1	0	1.65181e-09	0.255508	0.013443	9.07937e-09	0.0751695	0.501	0.129267	0.0256122	2.2781e-09	5.74939e-09
donor6_2.AGGATATAGGGATTTA.1	0	1.17779e-06	6.46133e-08	0.155906	7.67158e-08	8.0138e-08	0.581586	0.149048	0.0837437	0.00858948	0.0211252
donor6_2.AGGCCACATTGGTTAC.1	0	1.54678e-08	0.123764	1.03465e-07	2.57512e-08	8.69819e-09	0.740126	1.05381e-07	0.136111	5.10839e-08	1.53344e-08
donor6_2.AGGCCTGAGAATCTCG.1	0	2.56785e-07	5.07093e-07	2.4137e-07	3.08281e-07	0.0374702	0.733438	5.25879e-07	0.17737	0.0509503	0.0007697
donor6_2.AGGGACTCTACGCGAC.1	0	6.91226e-09	0.0547556	0.00201302	2.35925e-08	8.35905e-09	0.764833	0.167154	0.0112437	3.69096e-07	8.64796e-08
donor6_2.AGTCTAAAGTATACTC.1	0	3.52358e-08	0.00356617	0.120723	0.0474903	0.124028	0.684136	0.0200553	1.59104e-07	6.07214e-08	8.56389e-08
donor6_2.AGTGCTAAACACAGCA.1	0	3.2489e-09	2.64533e-09	1.81957e-07	3.64327e-09	1.57642e-08	0.812959	0.126586	0.0366035	1.46648e-09	0.0238507
donor6_2.ATAAGTAGGGCGACTC.1	0	3.18822e-09	3.0844e-08	1.01889e-08	0.0314775	0.15645	0.594227	0.147458	2.29187e-09	1.38402e-09	0.0703871
donor6_2.ATACGCCGGCGAAACC.1	0	3.12729e-09	0.00548374	0.0508174	0.0118228	8.84509e-09	0.690983	0.0271755	0.213717	5.11095e-08	2.77976e-08
donor6_2.ATCAAACGAAGGTTTG.1	0	4.28755e-07	0.210159	4.93933e-08	2.17335e-08	0.0024821	0.420896	7.34147e-07	0.318277	0.0481837	8.33059e-08
donor6_2.ATCTCCCACGGAATAT.1	0	0.0259411	6.40776e-08	8.14238e-08	0.00753708	0.00931316	0.664557	0.133751	0.1589	4.2457e-08	2.4815e-07
donor6_2.ATCTGACATGGAAGGA.1	0	2.87736e-07	3.31326e-07	3.15086e-07	0.0506587	6.33066e-07	0.720621	2.52466e-07	0.200104	0.0157743	0.0128404
donor6_2.ATCTGCACCTCTGCGA.1	0	3.10163e-08	6.49717e-09	0.0933498	0.0365115	0.0119381	0.511465	0.086375	0.216978	5.36824e-08	0.0433821
donor6_2.ATTCAACCATTTAAGG.1	0	4.70248e-08	1.8335e-07	1.53896e-07	0.0546397	8.3052e-08	0.519476	0.177391	0.248492	4.34183e-08	4.04234e-07
donor6_2.CACTCGAGCTGAACAA.1	0	2.57596e-08	4.017e-08	0.0181668	0.00599675	0.0455175	0.685647	0.163193	0.0792806	7.05034e-08	0.00219754
donor6_2.CATACCCGTACCCAGT.1	0	3.47838e-06	0.108469	0.0563115	1.26982e-06	5.66423e-06	0.531297	0.211569	0.0920008	0.000337644	3.73383e-06
donor6_2.CATCATTACCCTGAGG.1	0	2.31853e-08	2.96108e-08	3.34127e-08	0.0655925	0.0243669	0.530285	0.159172	0.220583	2.67688e-08	7.20002e-08
donor6_2.CCAACTTGATAGATCC.1	0	0.000284146	0.0158743	2.15037e-08	1.37092e-08	0.045351	0.699256	0.0464012	0.192833	6.23282e-09	1.18397e-08
donor6_2.CCACCAACTTTACTGT.1	0	3.3883e-07	6.15796e-07	8.13207e-07	0.0273694	1.89751e-07	0.668529	0.0438716	0.260227	9.57007e-08	1.83683e-07
donor6_2.CCGCGGGTACGAAGAA.1	0	2.02839e-10	0.0668911	0.0166651	1.69066e-10	0.0584877	0.509942	0.127108	0.220907	2.26782e-10	5.55325e-10
donor6_2.CCTTCAGTTAAAGTGA.1	0	6.40919e-09	0.00323575	8.21494e-09	0.01188	0.212154	0.728517	0.00108017	4.44883e-09	0.0431329	4.19336e-09
donor6_2.CGAGATTTCGCTCGGG.1	0	3.85768e-08	0.0394034	1.88819e-08	0.0285371	0.0143681	0.558125	0.120849	0.152374	0.022252	0.0640905
donor6_2.CGATAATACTCAGGTT.1	0	8.96024e-08	4.78442e-09	0.0718228	6.04521e-09	1.47684e-08	0.532137	0.261896	0.0927312	3.06215e-08	0.0414124
donor6_2.CTACACTCGCAGATGG.1	0	1.51612e-08	9.51489e-09	2.87473e-08	0.0100238	0.0366107	0.691559	1.29864e-07	0.099343	1.62309e-08	0.162463
donor6_2.CTAGCCACAGGCGAGC.1	0	2.11466e-07	3.78104e-08	1.64935e-07	0.0113826	0.0799356	0.706625	0.0152725	0.124366	3.31612e-08	0.0624183
donor6_2.CTATCGCGTAGAGAAC.1	0	8.83893e-08	0.0295435	0.0326417	6.36718e-07	0.0903788	0.614202	0.0949298	0.138303	2.08433e-07	1.90862e-07
donor6_2.CTATGGGAAGCGGAAT.1	0	1.03188e-08	1.59664e-08	9.20378e-08	0.0175177	0.0892914	0.513705	0.339263	0.0402221	5.24274e-08	8.45937e-08
donor6_2.CTCAGTCACGACAAAT.1	0	1.45657e-08	0.0404561	0.0160215	0.0370892	0.15397	0.720569	0.0269605	7.75043e-08	0.00493415	1.00496e-07
donor6_2.CTGAGAAAGTTCGGCG.1	0	0.0164666	0.00898515	0.00129647	0.00436025	1.73889e-05	0.569261	0.0827818	0.316831	5.17735e-08	9.74778e-08
donor6_2.CTGCTTGGCGATAGCT.1	0	0.0134217	2.80808e-08	0.0360798	1.98014e-08	0.00312228	0.734671	0.212704	2.99046e-07	1.1683e-07	6.11453e-08
donor6_2.CTGTGCAGGGTAGGTC.1	0	0.00864638	1.30842e-08	0.0738668	0.0267101	1.85065e-08	0.59683	0.130953	0.162993	2.91045e-08	2.09701e-08
donor6_2.CTTGAGTTAGGGTAAT.1	0	5.51088e-09	1.94558e-08	0.0628835	5.1171e-09	0.0330181	0.697869	0.176713	6.0707e-08	0.0198658	0.0096506
donor6_2.CTTTACCGAATAGTAG.1	0	2.18214e-09	2.91851e-09	0.0582843	0.000429489	0.00738636	0.761982	0.171918	5.62119e-09	5.85304e-09	9.93835e-09
donor6_2.GACATCCGTCGAACTG.1	0	1.82638e-07	0.0413309	7.30501e-07	3.59925e-07	4.9705e-07	0.71973	0.104037	0.0823928	0.052506	1.47061e-06
donor6_2.GAGCCAGCTACCTGTG.1	0	1.89187e-08	2.80556e-08	0.132419	0.0191287	3.78338e-08	0.735646	0.112805	2.40274e-07	6.24671e-08	2.31089e-07
donor6_2.GCATTCAAGGCAACGC.1	0	1.64499e-07	6.44707e-07	0.147438	0.049574	1.02793e-07	0.60146	0.128976	0.0725484	7.15152e-07	1.14761e-06
donor6_2.GCCAATAGGGCATCTC.1	0	1.17148e-09	2.9575e-09	6.01472e-09	0.0712716	4.62914e-09	0.602705	0.157233	0.150255	0.0185355	2.25784e-09
donor6_2.GCGAGAGTTGCGTCCA.1	0	0.0177323	0.046938	5.75341e-09	0.0462511	0.00889653	0.597985	0.144914	0.137283	1.62409e-09	9.04244e-09
donor6_2.GCGCTCGATCACCTGT.1	0	0.0145289	0.00817264	1.43428e-09	0.113757	0.0261399	0.54304	0.125458	0.168903	5.35207e-10	1.77037e-09
donor6_2.GCTAGAGTAGAGATGT.1	0	0.000495069	0.00645907	0.0823052	5.97148e-09	1.72031e-09	0.745861	0.104222	0.0606581	2.75291e-09	9.24224e-09
donor6_2.GCTCCATGCAAAGCAA.1	0	0.00892017	7.62326e-09	0.094552	1.32673e-08	1.103e-07	0.711208	0.0606289	0.124691	3.13881e-08	1.06592e-08
donor6_2.GCTGCTCTCCGGACAC.1	0	2.1937e-07	3.86177e-08	0.0327902	0.0402451	0.0830961	0.5273	0.0297867	0.286782	2.04353e-08	2.62643e-08
donor6_2.GGCGCGGAGATCTTTC.1	0	1.43442e-07	0.144553	4.1547e-07	0.062881	0.0788227	0.459502	0.0952274	0.0165785	0.140736	0.00169961
donor6_2.GGTATAGTGACACATA.1	0	0.00361255	6.1952e-08	0.0862472	0.0790164	1.81014e-08	0.668526	0.109602	0.0529956	1.01682e-08	1.1962e-07
donor6_2.GTACTCCTGGGTATGC.1	0	7.11531e-08	0.0332255	0.0999157	0.0453244	2.02116e-07	0.593246	1.24144e-07	0.228287	3.81997e-07	1.68171e-07
donor6_2.GTAGTTCGAAGGCGAA.1	0	1.30324e-08	0.0161803	7.21593e-08	0.00257617	1.52895e-08	0.687369	0.0111175	0.214227	4.25694e-08	0.0685299
donor6_2.GTTCATCGTTTGGCTG.1	0	8.81941e-08	0.0225895	0.125787	0.0688901	0.061634	0.427865	0.0797521	0.213483	5.06215e-08	3.81469e-08
donor6_2.GTTTCATATCGTCGCT.1	0	1.9751e-07	2.51206e-07	0.142206	0.00966821	0.0220979	0.521889	0.0296861	0.27445	3.76034e-07	7.55425e-07
donor6_2.TAATCAACCAAATGGG.1	0	3.86396e-09	0.0142079	0.0677116	4.4128e-09	9.50557e-09	0.440185	0.0156215	0.424694	1.83505e-09	0.0375798
donor6_2.TACTGGACAGCTCGGC.1	0	5.19724e-09	2.59875e-09	2.62873e-09	0.0220193	0.0122607	0.459452	0.099553	0.391505	1.11944e-09	0.0152106
donor6_2.TAGATGGTTCCTTACT.1	0	3.18978e-09	1.56442e-09	6.29017e-09	3.13738e-09	0.0611683	0.714267	0.0918858	0.132679	2.14808e-09	1.63848e-09
donor6_2.TAGTCTTTCCGAATTG.1	0	1.13851e-08	3.03619e-08	5.88801e-07	0.0250393	1.89686e-08	0.698498	0.0495949	0.226867	5.69215e-08	3.34505e-08
donor6_2.TATTCCGAGCTGTTAT.1	0	0.00548262	1.31722e-09	2.87996e-09	0.0723707	0.0560996	0.625466	0.0357	0.204881	1.61771e-09	3.91586e-09
donor6_2.TCACAGGAGAATAAGA.1	0	3.39266e-08	1.0704e-06	5.82031e-07	3.60599e-08	0.185852	0.793204	0.00693904	1.08643e-06	0.0140025	5.72143e-08
donor6_2.TCAGCCAATCCGTAAA.1	0	1.67004e-08	0.00559035	3.65921e-08	2.30485e-08	0.0465531	0.717869	0.0542869	0.175701	2.12247e-08	3.30022e-08
donor6_2.TCCCAAAGCCCTAAAT.1	0	0.00390431	2.09658e-08	0.0495951	0.0444938	3.11984e-09	0.638329	0.197178	0.0195588	1.26899e-09	0.0469412
donor6_2.TCCTAACCGTCGGGCA.1	0	0.00799875	0.0581083	0.0655252	2.68081e-08	0.0225898	0.523818	0.316355	0.00560505	5.87188e-08	8.88711e-08
donor6_2.TCTGAAGCACGTGGTC.1	0	1.5396e-08	0.0010283	3.31578e-07	0.030738	2.95184e-08	0.62971	0.0643703	0.274152	2.4676e-08	1.64259e-06
donor6_2.TGCCTAATTGAAGATT.1	0	0.0527869	0.00702417	7.91361e-07	0.0278658	9.34325e-10	0.551814	0.0762208	0.195393	6.85708e-10	0.088895
donor6_2.TGCGCCGTTAATAACG.1	0	0.0160238	7.3451e-07	1.38217e-06	4.63286e-07	0.0804514	0.676254	0.0587567	0.139656	2.31444e-07	0.0288551
donor6_2.TGCTCCACAGTTCTTA.1	0	0.0126066	0.0278879	0.0448621	0.00366638	7.45634e-08	0.614027	0.244391	0.0525588	4.7833e-08	2.24674e-07
donor6_2.TTACGGATGGTTCGAG.1	0	2.85749e-08	7.26117e-08	6.47595e-08	0.00179027	0.0195879	0.880269	0.0131299	0.0822459	2.03647e-08	0.00297653
donor6_2.TTCAGCTGGCGTGCCC.1	0	2.01993e-08	1.48554e-08	5.16752e-08	0.0324342	0.0215449	0.767798	8.38988e-08	0.169649	1.29171e-08	0.00857336
donor6_2.TTCTGCTAGACTCCAA.1	0	2.13497e-07	8.47593e-08	1.69224e-07	0.0524562	0.0067377	0.647631	0.148884	0.144291	1.04561e-07	1.17194e-07
donor6_3.AAAGGGCAGCTTGAAT.1	0	1.00833e-07	4.21505e-09	7.85975e-05	3.96221e-09	6.76481e-09	0.415214	0.140299	0.444407	6.09173e-09	8.57394e-09
donor6_3.AAATGGTCAATGTGCC.1	0	1.18046e-06	1.43048e-06	2.44904e-05	5.16073e-07	1.08118e-06	0.556941	0.0302967	0.365817	0.0469154	9.74379e-07
donor6_3.AAGAGGATGTACGCGA.1	0	5.97794e-08	0.00616249	0.0890865	1.43465e-07	2.94344e-07	0.410129	0.220391	0.27423	1.90503e-08	1.20837e-07
donor6_3.AAGTCAATTGTCGTCA.1	0	0.000664173	4.36154e-08	0.02562	0.057613	3.37482e-08	0.731421	0.0899811	0.0838558	0.0108451	1.94602e-07
donor6_3.AAGTGCCTTGACTGTA.1	0	6.38563e-09	5.34479e-09	9.3537e-09	0.0191087	0.00794146	0.744515	0.159166	0.0484339	1.95492e-09	0.0208347
donor6_3.AAGTTCACTCCAAGCT.1	0	1.18202e-05	3.66799e-06	8.55814e-06	0.0307418	3.70319e-06	0.557323	1.26482e-05	0.411864	3.16515e-06	2.81237e-05
donor6_3.AATAACAACGCTCGGC.1	0	4.64753e-09	0.0119553	0.0473514	3.57143e-09	2.36083e-08	0.426463	0.115871	0.366472	0.0318873	1.9408e-07
donor6_3.ACAAGGATGCTTTAGG.1	0	0.000158314	1.28552e-08	5.79161e-08	0.00075129	4.9236e-08	0.832892	0.0433154	0.122882	1.82972e-08	1.19646e-07
donor6_3.ACCAGTGCGGGAGACG.1	0	1.98847e-08	2.90651e-08	0.0382937	0.026004	3.58025e-08	0.770681	0.0198192	0.145202	5.92493e-08	4.44577e-08
donor6_3.ACGCAATCACTACAGC.1	0	1.67103e-07	3.5528e-07	0.265763	0.150941	7.96482e-08	0.531724	2.16162e-06	0.0515689	1.14692e-07	1.39416e-07
donor6_3.AGACGAAGTGCCGGTC.1	0	1.73683e-07	3.42772e-07	8.02845e-07	4.17913e-07	6.69573e-07	0.719452	0.115004	0.156884	3.52681e-07	0.00865655
donor6_3.AGAGTAAACTTCACTA.1	0	1.17525e-07	0.154913	5.64805e-07	0.00807782	0.084252	0.705882	2.63247e-07	1.29473e-06	1.05054e-06	0.0468717
donor6_3.AGATACTCAAGATCGA.1	0	0.0101512	4.99313e-08	0.154995	0.0212143	1.23407e-08	0.578097	0.0817315	0.153811	1.38027e-08	2.10019e-07
donor6_3.AGCTCTTTACTCAGTT.1	0	0.0169747	6.05599e-10	1.6531e-09	0.0087263	4.32398e-09	0.721355	0.0540496	0.195598	1.76835e-08	0.00329595
donor6_3.AGGTTACACCATGCCG.1	0	3.85607e-07	1.51905e-07	8.4136e-07	0.0290667	1.25241e-07	0.496557	0.125587	0.319715	2.93474e-07	0.0290733
donor6_3.AGGTTGAGGCACGCTT.1	0	3.18119e-10	1.12216e-10	2.81623e-10	0.022054	0.00178348	0.901182	0.00473432	0.0702463	1.10992e-10	5.3873e-10
donor6_3.ATCAGCCTCATGCTGC.1	0	0.0393037	4.36896e-09	2.93462e-07	5.36568e-09	1.08331e-08	0.794063	0.111301	0.0553327	2.02099e-08	5.26178e-08
donor6_3.ATGCGACAGTCCCATT.1	0	0.00316968	7.21003e-10	0.16041	1.60135e-09	0.0850238	0.342725	0.0766993	0.299567	8.50379e-10	0.0324056
donor6_3.ATGGCGGAATAGTCGC.1	0	1.39696e-09	3.13774e-09	0.0777873	8.57752e-09	3.16785e-09	0.693079	0.114865	0.114269	2.43252e-09	3.71064e-09
donor6_3.ATTATTCAGAGTCACT.1	0	1.45807e-07	0.00996887	1.09151e-05	0.0446629	0.0725584	0.465116	0.0682573	0.339425	2.24034e-07	4.69451e-07
donor6_3.ATTCAGTAGCAGGGTC.1	0	1.70275e-09	1.04684e-09	7.9569e-09	5.62534e-10	9.65087e-10	0.514444	0.0996185	0.364504	0.021434	2.09945e-09
donor6_3.CAACACATCTCCTGCC.1	0	1.57492e-07	4.35894e-08	1.8752e-07	0.0772554	7.50663e-08	0.80802	0.016791	0.0979312	1.0818e-07	1.32276e-06
donor6_3.CAAGGTCCTATAGGCT.1	0	1.6873e-07	0.0395458	0.131838	0.064048	2.6961e-08	0.497293	0.0152554	0.252019	6.11907e-08	1.22688e-07
donor6_3.CAATGAGGTTCGACTA.1	0	0.000807363	1.67892e-07	0.0106131	0.0548792	8.87848e-06	0.597316	0.214969	0.121404	3.04808e-07	2.13849e-06
donor6_3.CCACGAATTTAACCTC.1	0	2.67044e-07	2.38953e-07	0.244705	0.0163892	0.021245	0.47707	0.133136	0.0940658	5.45919e-07	0.0133881
donor6_3.CCACTATCCGGGTCAC.1	0	6.31034e-08	6.89741e-08	0.0372847	0.000163857	0.0315337	0.710534	2.74595e-07	0.141536	1.52232e-08	0.078947
donor6_3.CCGCCGTTGAGGATAA.1	0	1.49808e-09	2.52226e-09	8.32393e-08	1.86782e-09	0.0234355	0.770579	0.168602	4.23261e-08	2.0042e-09	0.0373833
donor6_3.CCTATGTCCACTCCAC.1	0	0.00308315	0.000416444	5.66762e-07	7.29895e-08	0.013303	0.664924	0.0110365	0.307235	1.17866e-06	7.55395e-08
donor6_3.CCTCCGACAATTCAAG.1	0	2.16381e-07	0.00779838	0.076576	0.00625707	2.19211e-07	0.600818	0.218001	0.0849775	0.00557114	3.67231e-07
donor6_3.CCTCCTGTTGTGTCGT.1	0	1.66514e-08	7.65595e-09	0.0301749	7.79342e-09	0.0316669	0.605748	0.100549	0.157613	0.0407556	0.0334925
donor6_3.CGACACGCTCCGACAG.1	0	7.32789e-10	4.26919e-10	0.0292282	3.66846e-10	2.12486e-10	0.657088	0.117269	0.196414	8.60382e-10	7.42225e-10
donor6_3.CGCATCCATCAGCCAG.1	0	3.81229e-08	0.0113916	0.16495	0.109939	6.76289e-08	0.502162	0.00221309	0.209344	4.45478e-08	1.55609e-07
donor6_3.CGGAGTTTGAGAGACA.1	0	7.92234e-09	8.98253e-08	0.110905	1.40532e-09	2.82991e-09	0.719617	0.142623	0.0268552	1.74712e-08	4.14413e-09
donor6_3.CGTGCAGACTGGGACA.1	0	2.9183e-09	0.196378	0.0697981	2.42006e-08	4.605e-09	0.484858	0.193272	0.0556933	2.60202e-09	5.57303e-09
donor6_3.CTAAAGGATGAGATAC.1	0	3.16772e-09	0.0983335	0.0488861	9.81582e-10	0.00687784	0.67489	4.96738e-09	0.150238	0.00797967	0.0127942
donor6_3.CTCCGCCCACATGAGG.1	0	0.0616382	0.00112583	0.168126	0.00940547	5.56619e-07	0.454627	0.163242	0.0853308	0.0286042	0.0278995
donor6_3.CTGCCTCATATGCAAC.1	0	7.15242e-10	8.35292e-10	1.6494e-09	0.035078	1.18592e-09	0.66779	1.75398e-08	0.297132	1.07223e-09	1.0456e-09
donor6_3.CTTATAGATGGCTGTT.1	0	8.50541e-07	1.60034e-07	2.99649e-07	1.05693e-07	0.0420878	0.658794	0.156314	0.142802	2.54149e-07	4.97566e-07
donor6_3.GACCGACGTGAAAGCA.1	0	1.82845e-08	0.119022	5.92036e-08	0.0188609	0.0430732	0.749374	6.2162e-08	0.0149356	0.0547345	5.2971e-08
donor6_3.GAGCGCAAATACTCCG.1	0	5.44377e-08	1.55722e-06	0.0289172	0.0127838	0.219412	0.549298	0.076097	0.109622	5.88532e-08	0.00386875
donor6_3.GAGTATCAAAGTTACA.1	0	0.0181984	1.34962e-07	2.04609e-06	0.0107109	0.00528557	0.749676	0.0563821	0.159744	4.02674e-07	5.38767e-07
donor6_3.GATCGGTGGCCATAAC.1	0	3.02094e-07	0.0259438	1.08443e-07	1.68884e-08	8.98545e-09	0.651846	1.3136e-07	0.299039	0.0231705	1.61979e-08
donor6_3.GCGGGCATTACGATGC.1	0	2.91802e-10	6.61199e-05	9.09562e-10	0.11435	0.0117109	0.700789	8.09843e-10	0.173084	4.69073e-10	5.25411e-10
donor6_3.GCGTCTCTGCATTGGG.1	0	1.38947e-09	1.6632e-09	4.71832e-08	1.30955e-09	2.82485e-09	0.742552	0.129388	0.118209	0.00985044	1.08587e-09
donor6_3.GGAGGCCGAAGTCGTC.1	0	4.47205e-08	2.02931e-08	8.13406e-08	0.00417573	0.00344803	0.941442	0.0509337	6.37069e-08	2.85543e-08	2.05545e-07
donor6_3.GGCGTCCTATCCGCTG.1	0	1.84238e-06	0.000345172	0.0158953	3.09762e-06	2.17106e-06	0.653757	0.145512	0.184061	0.000421518	1.71869e-06
donor6_3.GTACTGGAGTTAGACC.1	0	7.75896e-08	1.74885e-07	0.258017	7.4889e-07	1.65361e-07	0.348208	0.0870648	0.306708	2.05923e-07	1.95231e-07
donor6_3.GTCGTCTGGTTGGCTA.1	0	3.28439e-08	0.05462	1.70232e-07	0.0100925	1.09695e-07	0.663435	0.0232192	0.138924	0.00964529	0.100064
donor6_3.GTGAAGCCGTATAGTC.1	0	0.0104685	2.06563e-07	0.034113	0.102653	2.51682e-07	0.662369	0.0126522	0.177744	3.95798e-07	3.12537e-07
donor6_3.GTGATCACTAACGCCT.1	0	7.58754e-09	6.60085e-09	0.0324483	7.30037e-09	0.11318	0.636859	5.839e-08	0.217512	6.65178e-09	6.40162e-09
donor6_3.GTTAGCCGTAAATCAA.1	0	1.33559e-09	6.46853e-10	0.0528306	0.082183	0.00015186	0.717744	0.14709	1.20471e-08	6.57595e-10	1.10816e-09
donor6_3.GTTGAACCGGTTCCAT.1	0	1.36751e-09	1.81706e-09	0.0252515	0.00546822	7.69274e-10	0.74661	0.0688404	0.12544	1.47918e-09	0.0283897
donor6_3.GTTTGGCCCAAGTTAT.1	0	5.60988e-09	4.04899e-09	0.0560324	0.00334399	3.629e-09	0.62092	0.0818844	0.23782	1.05248e-08	9.23066e-09
donor6_3.TAATAGAACAGAGTTA.1	0	3.06195e-09	0.0272325	1.73373e-09	2.42067e-09	4.9738e-09	0.801495	0.114022	0.057251	6.66474e-10	1.50259e-09
donor6_3.TAATAGTGACGACCAG.1	0	3.14098e-09	0.0138945	0.0505479	0.0792274	1.01698e-09	0.691181	0.0346542	0.130495	2.00333e-08	4.17273e-09
donor6_3.TACCGGTCGTTTCCAT.1	0	2.51912e-09	7.2305e-10	1.36986e-09	4.96172e-10	8.2738e-10	0.618178	0.171787	0.208024	0.00201099	1.0866e-09
donor6_3.TACGCTCGGTATTGGA.1	0	0.037564	3.17686e-08	0.0610812	5.0829e-09	0.00755255	0.556329	0.127248	0.138859	0.0532481	0.0181182
donor6_3.TAGCCATTTCAAAGTC.1	0	5.49963e-08	5.92589e-08	2.08704e-07	0.0541139	1.17062e-07	0.347507	0.090465	0.507913	1.15716e-07	3.36151e-07
donor6_3.TAGCCGGCGGTCAGCG.1	0	1.75953e-07	9.14526e-08	0.0989528	0.0314598	2.02467e-06	0.492547	0.108038	0.250207	7.47799e-08	0.0187926
donor6_3.TATTTGATTTGCACAG.1	0	0.0316017	6.84422e-08	1.38248e-07	3.88167e-08	0.0334056	0.584947	0.281372	0.0686721	9.8674e-08	1.14482e-06
donor6_3.TCCAACTTTAAATTCT.1	0	0.0197973	1.21334e-09	4.39094e-09	8.84336e-09	8.72599e-10	0.810283	0.0486854	0.110901	0.0103333	3.31581e-09
donor6_3.TCCCAAACAGACAACG.1	0	1.66762e-07	1.32005e-07	4.91943e-07	0.0164188	0.0380305	0.748913	0.139558	0.0467503	0.0103278	6.77652e-07
donor6_3.TCCGATTACATTGCCG.1	0	0.00560106	1.62255e-09	0.0835138	2.37107e-09	2.40797e-09	0.506424	0.164108	0.196179	4.15726e-09	0.0441749
donor6_3.TCCTCTACGAGATGGC.1	0	3.50326e-08	1.26095e-07	0.0562521	1.2669e-08	0.0744053	0.582752	0.133576	0.11332	0.0396951	2.92567e-08
donor6_3.TCGCTCGGCACCAGCG.1	0	0.0394221	8.568e-08	0.054072	0.0707589	4.14675e-08	0.806182	1.94444e-07	0.0295615	3.41027e-06	1.67756e-07
donor6_3.TCTAGTGATATCGTGG.1	0	6.79045e-09	6.4931e-09	0.0403891	0.0384538	2.4681e-09	0.745504	0.0966111	0.0790419	3.36699e-09	1.93984e-08
donor6_3.TCTATGCTATAACGAC.1	0	7.2052e-09	4.15318e-09	0.0961255	4.99789e-09	0.060702	0.622916	0.00918685	0.21107	4.46733e-09	1.43523e-08
donor6_3.TCTCCCTGGGCAGCGT.1	0	0.0230748	3.55096e-08	0.124865	0.00769307	2.40868e-08	0.639081	0.0842726	0.117616	0.00339738	4.18979e-07
donor6_3.TCTTAGAGCTCCAATT.1	0	0.0176739	9.31478e-08	1.50078e-07	0.0870391	0.0428358	0.414469	0.0498674	0.295198	8.71465e-08	0.0929167
donor6_3.TGAGAGATTTACCACG.1	0	0.0116836	0.0499031	0.0538229	0.0398447	8.15874e-08	0.730134	0.0386037	0.0173654	2.76667e-07	0.058642
donor6_3.TGAGCCATACAGTCTC.1	0	1.27523e-08	3.69655e-08	0.096955	2.3067e-07	4.21616e-09	0.609588	2.85432e-08	0.260494	9.97559e-09	0.0329632
donor6_3.TGCCGAAAGCGTATTC.1	0	2.32638e-07	1.48891e-07	0.110558	0.0311989	0.035976	0.709547	8.80364e-07	0.105479	4.26619e-07	0.00723923
donor6_3.TGGAAGAAGGGAACGT.1	0	4.60368e-07	9.03159e-07	0.0315612	0.00238489	6.8942e-07	0.418206	0.0225565	0.516875	6.77768e-07	0.00841383
donor6_3.TGTATAACAGATCCTG.1	0	0.0158585	4.26718e-08	0.0113817	7.22506e-09	4.67628e-09	0.741869	0.0416299	0.189261	5.76064e-09	5.34069e-09
donor6_3.TTCCGGTATCTGTGTC.1	0	1.31861e-07	1.59576e-06	0.182834	0.02614	0.0858828	0.637347	0.0159688	0.0518258	8.53906e-08	3.53294e-07
donor6_3.TTGACTATTGTCCGGC.1	0	0.0221902	0.0158048	0.0164341	0.018757	0.0519694	0.554912	0.0428341	0.277098	8.11728e-09	1.91003e-09
donor6_3.TTGGACCTATAACAGT.1	0	1.04063e-09	4.3203e-10	1.07036e-09	0.0122693	1.19542e-09	0.791207	4.37528e-09	0.156727	7.34579e-10	0.0397967
donor6_3.TTGGGAAGACGAGCCG.1	0	1.11499e-07	4.51448e-08	0.00419187	8.08261e-08	1.25424e-07	0.928035	1.26496e-07	0.0677719	3.42176e-08	8.59918e-07
donor6_3.TTGTAAGGCCAGTTGG.1	0	0.00381781	1.07706e-08	1.36238e-07	0.0287092	7.45444e-09	0.625649	0.00847366	0.279205	1.41563e-08	0.0541457
donor4_1.AATTCATAAGGGATCT.1	0	6.56574e-07	0.113574	1.25155e-06	0.0335281	1.33825e-06	0.766077	0.0521231	0.0346905	2.54738e-06	1.74737e-06
donor4_1.ACTCCCGAATTCGTTT.1	0	0.0320822	5.79644e-08	7.33406e-08	0.04298	3.38005e-08	0.624262	0.135448	0.130121	0.0351064	5.09107e-08
donor4_1.AGCAACATATCTTATT.1	0	8.57048e-09	0.144026	1.1302e-08	0.03498	0.0770216	0.601379	0.0437427	0.0489358	0.0435722	0.00634202
donor4_1.CAAGTGTGGTTGCAAA.1	0	0.0106627	1.50282e-07	0.020688	0.0271112	0.0200864	0.748988	0.0320474	0.140416	2.66616e-08	1.10953e-07
donor4_1.CCACGGTGCCCGGTAG.1	0	1.6338e-07	0.0334245	9.74203e-08	0.0385685	0.131829	0.550836	0.0338526	0.149278	8.96702e-08	0.0622111
donor4_1.CCGCTTGCTGACATGG.1	0	0.0310696	0.0811012	8.33239e-07	0.0165408	0.0309188	0.696302	1.09115e-06	0.14268	6.57501e-08	0.00138548
donor4_1.GAAAGAACAGCGTTAT.1	0	3.91283e-07	0.0859836	0.0954874	1.10536e-06	0.0566959	0.728782	4.97092e-07	0.0330465	1.97062e-06	6.94138e-07
donor4_1.GAAATTAGCACGGATA.1	0	2.58916e-08	2.76836e-08	1.62154e-07	0.00510505	1.12914e-07	0.832759	0.104033	0.0581027	2.36929e-08	3.92429e-07
donor4_1.GCAACCACCAGACCGG.1	0	0.00413819	0.0552742	0.140969	0.0231396	0.0766958	0.608649	1.22649e-06	0.0703051	3.31815e-07	0.0208283
donor4_1.GCGCTGATCCAGACTC.1	0	1.05194e-07	0.011352	0.0470709	0.011158	0.0389831	0.591567	5.1605e-06	0.299863	3.97217e-07	4.97437e-07
donor4_1.GCTCATTACTGCATGT.1	0	4.3285e-09	1.68525e-08	2.80499e-09	2.34962e-09	0.0272876	0.855664	1.23505e-09	0.109461	0.00758696	1.0742e-09
donor4_1.TAATAAACAAGGAGAT.1	0	6.7765e-09	0.0878968	0.0562873	0.0223039	1.82262e-08	0.683089	0.0548626	0.0854706	0.0100896	1.17989e-08
donor4_1.TGCTGTTGAAGAACTC.1	0	1.64811e-09	0.0328552	5.22812e-09	1.9242e-09	0.206867	0.605832	0.0569807	0.0292742	0.038935	0.0292563
donor4_1.TGGGATGCACTCATTC.1	0	4.90716e-08	1.23617e-07	0.0767084	0.0955977	0.0179348	0.803814	2.7108e-07	1.83964e-06	0.00594271	3.41996e-07
donor4_1.TTCTGACCGGGCTCAA.1	0	1.55934e-09	0.0973348	2.55341e-08	0.010194	0.081782	0.735614	0.00727445	0.0592319	0.00856915	2.06175e-09
donor4_1.TTCTGCTAGACTCCAA.1	0	1.38837e-09	0.0306524	5.61608e-08	0.0452931	0.00563619	0.819698	6.74673e-09	0.0738066	2.23843e-09	0.0249134
donor4_2.AAAGACCCAAGTCGCG.1	0	2.70287e-09	4.5212e-09	0.0903332	0.0117028	2.83452e-09	0.897964	6.71308e-09	4.96644e-09	3.43446e-09	1.66714e-08
donor4_2.AGGACATCGCACGTCG.1	0	1.71894e-07	1.75238e-07	0.216882	1.50578e-07	0.0375848	0.619378	9.06789e-07	0.125967	4.81175e-08	0.000187233
donor4_2.AGGCTATGGTTAGCTT.1	0	3.26637e-08	2.68637e-08	0.0768082	1.15325e-08	0.0293739	0.489406	0.141901	0.159131	7.3177e-09	0.10338
donor4_2.ATAGTGAAGCGTTCTC.1	0	5.38782e-09	1.51164e-08	9.11346e-09	0.0421236	0.0171374	0.763143	0.0616979	0.115898	3.54638e-09	1.84224e-08
donor4_2.CCTTTAAGGGAGCACT.1	0	6.19065e-09	5.40743e-09	1.43944e-08	0.0445764	0.0342616	0.581608	0.218873	0.116558	4.79048e-09	0.00412241
donor4_2.CGTCAGTGCGCACAAG.1	0	1.14211e-08	4.43372e-09	8.62131e-08	6.67714e-07	1.04165e-08	0.575559	0.00100323	0.372401	3.88917e-09	0.0510364
donor4_2.TCAGGTTCTTTGAGAA.1	0	0.01135	0.0180803	8.92071e-07	6.93661e-07	0.0371263	0.784525	1.95052e-06	0.135377	1.61304e-07	0.0135375
donor4_2.TCGCGTCCAGAAGGTC.1	0	3.79852e-09	0.0991317	7.56354e-09	4.15886e-09	6.37362e-09	0.610757	0.14611	0.144002	3.79653e-09	5.63433e-09
donor4_2.TGTATGGCGCAGACAG.1	0	4.42373e-08	0.0792854	0.220855	4.67133e-08	0.00839711	0.638821	0.0526402	1.28976e-07	1.21966e-06	4.11743e-08
donor3_1.AATGCAACCGGGTACC.1	0	1.90255e-08	0.0192899	1.47158e-07	0.0508782	0.032466	0.585955	0.190723	0.0562846	0.0644033	6.57275e-08
donor3_1.ACCCTATGCCATATCG.1	0	0.00564305	0.00956929	3.12408e-08	0.0630084	2.95265e-09	0.777257	0.0354728	0.109049	2.59399e-08	1.26835e-09
donor3_1.ACGTTAGATTTGCCCG.1	0	1.03688e-08	0.00441588	1.80582e-08	1.78708e-08	2.19488e-08	0.709688	1.56989e-07	0.285896	2.80673e-08	6.95582e-08
donor3_1.ACTTGACTCCCTCTTT.1	0	4.53137e-08	7.15319e-09	2.81281e-08	1.20762e-08	1.27076e-08	0.647301	0.0169039	0.333044	2.79675e-08	0.00275064
donor3_1.AGGTAGGTACAAAGCT.1	0	1.85415e-08	0.0393322	5.13131e-08	5.90884e-08	0.0961356	0.671232	7.21942e-08	0.173803	3.01923e-08	0.0194968
donor3_1.ATTCAGTAGCAGGGTC.1	0	3.79833e-08	0.045648	2.10478e-07	0.113214	8.32911e-08	0.478428	0.0760687	0.250281	0.0186145	0.0177456
donor3_1.ATTCGACGCCGGGCCT.1	0	1.3129e-09	6.79388e-09	7.27928e-09	9.18171e-09	0.129802	0.733067	6.11193e-09	0.137131	3.82317e-09	3.98264e-09
donor3_1.CACGCAGCGAGGCTTT.1	0	6.93079e-10	5.23641e-10	6.9107e-10	0.007785	1.31878e-09	0.660545	0.177933	0.13543	0.018307	7.00548e-10
donor3_1.CCCTGCGCTACGCATA.1	0	0.00470342	3.66676e-10	1.11843e-09	0.0367584	0.0288439	0.641904	0.135219	0.152572	1.33048e-09	4.22158e-09
donor3_1.CGCAATTAGGGTAATA.1	0	1.63827e-07	1.13893e-07	7.21076e-07	0.0177978	0.0416806	0.594107	0.151519	0.194894	4.17027e-07	1.28602e-07
donor3_1.CGCCCTTGAAGGCTGA.1	0	0.0362635	0.033604	1.89521e-08	5.08666e-07	0.0518712	0.730184	2.80026e-08	0.147506	9.50682e-09	0.000571301
donor3_1.CGGGATCAATGTAAGA.1	0	0.00983748	4.1791e-08	0.0756907	1.78021e-08	0.0796818	0.640855	1.67613e-08	0.193935	1.69192e-08	1.10687e-08
donor3_1.CTAGTGAAGGACAGGA.1	0	8.32422e-09	1.99749e-08	8.96687e-07	0.0844519	0.0306463	0.524643	0.0766106	0.283648	2.58741e-08	1.59999e-08
donor3_1.CTGCTGAGGCCACGAA.1	0	3.41226e-09	0.00890592	0.0259256	0.0102054	0.0527766	0.620793	0.0721604	0.209233	2.99205e-09	3.69168e-09
donor3_1.GAAGCTTGCTGACCGC.1	0	4.16827e-08	1.31268e-07	7.34177e-08	0.0128112	1.22315e-07	0.718333	1.05589e-06	0.268854	5.72628e-08	2.26856e-07
donor3_1.GACGACGATCCGCGTT.1	0	0.00673821	0.0380345	0.0257789	0.0672234	2.75558e-07	0.648527	0.0615849	0.142879	6.6123e-08	0.00923304
donor3_1.GAGGAATGGAGAGGTT.1	0	1.20113e-07	5.84499e-08	2.76238e-07	0.0480723	2.90864e-06	0.661751	0.0960883	0.194085	6.58766e-08	4.76753e-07
donor3_1.GAGTTGATGGCAATTT.1	0	1.22207e-07	0.067105	4.5034e-07	0.0304198	1.52527e-07	0.569694	3.98102e-07	0.332779	4.93732e-07	5.05422e-07
donor3_1.GATTCCTATACGGCGC.1	0	0.037915	4.56692e-09	8.96993e-10	0.0109383	7.83701e-09	0.661779	0.0808376	0.208531	2.92075e-10	1.82541e-09
donor3_1.GCGACGATAGTTGTAC.1	0	3.1406e-07	0.0541425	8.74989e-07	1.51948e-06	0.0244314	0.683129	0.134071	0.0875052	0.0167179	9.11766e-07
donor3_1.GCGGACCGCGTTGTGG.1	0	3.34379e-09	8.7982e-10	1.1907e-09	1.31477e-09	5.79268e-10	0.697101	9.58411e-09	0.302899	4.71972e-10	4.67074e-10
donor3_1.GCTAATACCGAATGCC.1	0	0.00665188	0.172097	4.5067e-08	0.00953784	1.25549e-08	0.695301	1.49432e-06	0.11641	2.21298e-07	3.58168e-08
donor3_1.GGGAACGGGAGGTTAG.1	0	1.34808e-07	3.20138e-08	8.43432e-08	4.38329e-07	2.51559e-07	0.629716	9.35507e-07	0.370282	4.68885e-08	9.6183e-08
donor3_1.GGTCGGTCGTCCACAG.1	0	1.45113e-09	1.09789e-09	3.5102e-09	0.0574844	1.63282e-09	0.542647	0.238847	0.161022	2.1722e-09	1.82152e-09
donor3_1.GGTTAGTTACGGCGCC.1	0	0.00874957	5.29592e-08	7.5203e-08	0.0266107	1.53938e-07	0.824605	0.13229	8.89562e-07	5.04691e-07	0.00774301
donor3_1.GTTACCTACAACTTGC.1	0	7.09746e-08	1.68683e-07	5.02855e-08	0.0309805	2.68248e-08	0.663852	0.205512	0.0996555	2.54654e-08	3.5294e-08
donor3_1.TAGATATGGACTGGAA.1	0	2.06038e-06	1.47369e-07	2.96577e-07	0.0596477	1.41642e-07	0.663871	0.245347	0.0311196	1.41178e-07	1.14415e-05
donor3_1.TAGCTAAGTCCGGGAG.1	0	2.79945e-09	1.35817e-08	7.61676e-09	0.0014106	3.82837e-09	0.813816	3.56736e-08	0.184773	2.51641e-09	8.42753e-09
donor3_1.TATTCCACTCAGCTCG.1	0	8.87042e-09	3.59656e-09	1.72569e-08	1.00413e-07	7.15953e-09	0.529691	0.186386	0.283923	1.01228e-07	9.00332e-09
donor3_1.TATTTGTTACCCTTTA.1	0	2.97135e-08	1.34006e-07	4.44585e-07	1.47492e-06	0.0895421	0.768606	0.0855609	0.0393351	1.3042e-07	0.0169533
donor3_1.TTAACCAACCCTCCCT.1	0	8.63178e-09	0.0267063	0.0252964	0.0138794	0.0143992	0.681927	0.152112	0.0856797	3.91831e-08	2.15327e-08
donor3_1.TTACAACTACGCATCC.1	0	1.7177e-08	0.0218569	8.77956e-08	0.0010324	0.0217921	0.745386	6.33137e-08	0.209933	3.78342e-08	3.50839e-08
donor3_1.TTCCTCGAGGGTGTCT.1	0	0.0376627	5.24022e-07	4.6011e-07	5.42719e-08	2.98506e-08	0.523681	0.0456372	0.306892	0.0655561	0.0205702
donor3_1.TTGCGTCGGCCAACCG.1	0	7.33291e-07	0.167124	6.20967e-07	5.86229e-07	4.72971e-06	0.5261	0.0936225	0.189674	1.93397e-05	0.0234532
donor3_1.TTGTGGCCCTGACAGT.1	0	1.31487e-08	0.0415902	0.0283341	0.0302272	0.00954691	0.595191	0.29511	3.37346e-07	3.49516e-08	1.2149e-08
donor3_2.AACTAGGCTTGGGTGT.1	0	1.50021e-09	1.54086e-08	2.17963e-09	0.0449738	0.0657959	0.640213	0.0437552	0.205262	2.34097e-09	1.98686e-08
donor3_2.AAGGGACAGATTCTGT.1	0	1.14536e-08	0.003052	3.30307e-08	0.00766768	1.91642e-08	0.72633	0.094158	0.168792	2.59717e-08	5.97088e-08
donor3_2.ACGTTAATGTCGAAGA.1	0	4.01212e-07	0.106695	0.0292521	3.45682e-07	2.67311e-07	0.621363	0.164177	0.0522098	0.0172746	0.0090275
donor3_2.AGTGACCTACTTTACG.1	0	1.2066e-09	0.0295192	3.42414e-09	0.00772156	1.73771e-09	0.760406	0.11124	0.0859096	1.32795e-08	0.00520413
donor3_2.ATATTTAACCCTCAAG.1	0	1.03288e-10	9.76792e-11	0.0237649	0.0282365	9.63352e-10	0.494299	0.167473	0.286227	2.01774e-10	3.27434e-10
donor3_2.ATCACATTAGAATATC.1	0	4.88696e-08	7.28825e-08	0.0690117	5.36169e-08	0.0938405	0.531174	0.0351096	0.270864	1.11973e-07	3.93315e-08
donor3_2.ATGATGCAATGGTACA.1	0	0.00596171	0.0154913	0.049823	3.63544e-08	2.45575e-08	0.716895	6.51766e-08	0.194295	6.01203e-09	0.0175335
donor3_2.ATGCCGGTTGATGGGA.1	0	0.009161	6.54595e-08	6.4545e-07	1.25239e-07	0.11796	0.842287	8.82802e-07	0.0305894	2.33962e-07	1.04588e-07
donor3_2.CACCTTGCGAAACTCG.1	0	2.01094e-08	0.00454515	0.0148837	0.00350415	4.21238e-08	0.778495	0.106038	0.092534	1.91355e-08	6.09307e-08
donor3_2.CACGTTCGTGCTCTAG.1	0	0.0183578	1.74833e-07	5.01042e-07	0.0672468	0.0422319	0.743036	3.42577e-07	0.127052	2.48482e-08	0.0020742
donor3_2.CATTTAGCGGACCATG.1	0	1.25962e-09	0.114447	3.26635e-08	0.0391671	0.0345484	0.473929	0.096188	0.24172	2.1147e-09	3.9073e-09
donor3_2.CGCTCTCCGTAGATTA.1	0	2.54791e-07	0.0172651	0.0481327	0.00902478	0.0146899	0.683028	0.00613671	0.1649	0.0568229	1.39796e-07
donor3_2.CGGAGCAATTTAATCG.1	0	2.04586e-08	2.29359e-08	5.79293e-08	0.00282196	0.124637	0.745694	0.0338907	0.0929565	1.20949e-08	4.13579e-08
donor3_2.GAGATCTGCTTGGCAT.1	0	4.56931e-08	0.00798134	2.61435e-08	0.0742624	5.73304e-08	0.30878	0.0395124	0.569464	3.66226e-08	8.99165e-08
donor3_2.GAGTGTGCGGTACCCA.1	0	5.03365e-09	7.95758e-09	0.0126118	0.0114564	1.63286e-08	0.771112	0.132467	0.0723531	2.44597e-09	1.18804e-08
donor3_2.GATCGTGACTGATATC.1	0	9.23853e-08	8.93755e-08	0.028392	0.00137552	0.0456143	0.745322	2.45223e-07	0.132196	0.0459782	0.00112159
donor3_2.GCGACGATAGTTGTAC.1	0	0.0438463	4.47295e-08	1.03548e-06	0.103226	4.32107e-08	0.234382	0.241314	0.281705	0.0955257	1.20961e-07
donor3_2.GCGCTAATTGAATAGA.1	0	0.0146226	1.51309e-09	3.39412e-08	0.0597158	2.8664e-09	0.476105	0.30664	0.120717	0.022199	4.0783e-08
donor3_2.GCTGCTCTCCGGACAC.1	0	9.66509e-09	0.0524353	0.0115008	0.0383365	1.51809e-08	0.772603	1.14935e-08	0.117736	7.24999e-09	0.00738796
donor3_2.GGAAAGTGCCCATGCC.1	0	0.00221069	1.7202e-08	1.1053e-07	0.0558771	1.74619e-08	0.532473	0.114995	0.287288	2.69603e-08	0.00715528
donor3_2.GTCATTAGAGCGAACG.1	0	0.0104227	1.30017e-10	5.52573e-10	0.00368016	3.09434e-09	0.840889	5.46823e-10	0.145009	3.17559e-10	3.51412e-10
donor3_2.GTTACTTTGGGCCTAG.1	0	1.02988e-09	1.34804e-09	1.63466e-08	0.0381771	2.3753e-09	0.657034	0.0251121	0.279676	1.03267e-09	3.06933e-09
donor3_2.GTTCACAGGAGTCTAG.1	0	1.19815e-08	0.0341824	2.75191e-08	1.02421e-08	2.02061e-08	0.769487	2.23828e-08	0.196331	1.41029e-08	1.69354e-08
donor3_2.TGCAAGAATGACGTAA.1	0	1.54529e-08	0.0620748	1.69562e-07	0.0274008	0.045232	0.675221	0.054963	0.135108	4.19678e-08	6.28229e-08
donor3_2.TGCAGGATCGGCAAAG.1	0	1.26076e-09	4.3691e-10	7.18594e-10	0.00825675	4.74982e-10	0.708926	1.32979e-08	0.282818	2.40056e-09	1.15483e-09
donor3_2.TGCTGTTGAAGAACTC.1	0	0.000126838	2.9286e-05	0.0433706	0.00033078	0.015079	0.6148	0.00545716	0.320573	5.23585e-05	0.000181218
donor3_2.TGGACTGTTCGCTCAA.1	0	1.85327e-09	8.81876e-10	2.00602e-09	0.0136252	0.0373712	0.661125	0.135883	0.151995	8.53587e-10	1.11598e-08
donor3_2.TGTTATTGTATGTGGC.1	0	0.00521268	1.64358e-07	1.53205e-07	0.0408615	0.0596543	0.726959	0.0850042	0.0820829	2.82229e-08	0.000224617
donor3_2.TTACAGACCTAAATGA.1	0	0.00564365	2.56255e-07	5.75716e-07	0.0177351	1.60306e-07	0.607005	0.276559	0.0732691	0.0197865	6.6632e-07
donor3_3.AACGCGGTCTCCAGCC.1	0	0.0130004	0.0370547	1.04206e-07	1.64884e-08	0.0197315	0.690037	1.72116e-07	0.240175	7.71437e-07	5.85189e-07
donor3_3.AATCGCCTCAGCGCCA.1	0	5.15817e-10	5.55847e-09	4.32703e-09	0.0301627	0.0217765	0.600214	8.19385e-09	0.330824	0.00688971	0.0101335
donor3_3.ACATTAGTTTATATCC.1	0	0.00156933	0.000415649	0.0842799	0.0192631	1.38179e-09	0.783542	0.0374045	0.0735259	1.52378e-09	1.65876e-09
donor3_3.ACTCCCTAGAATAGTA.1	0	8.46637e-10	0.0132148	1.17528e-09	8.16717e-10	1.07828e-08	0.936881	0.0207318	0.0102105	0.0189615	3.47528e-09
donor3_3.ACTCTCTGACTTAGGT.1	0	7.64018e-10	0.00643665	5.232e-09	1.60301e-09	0.0227396	0.672086	0.125609	0.173129	5.55259e-08	1.5754e-08
donor3_3.AGCCCGGTAGCCTGTA.1	0	3.47634e-09	3.07262e-09	4.35818e-09	0.0576281	4.93852e-09	0.643232	5.71993e-09	0.29914	2.24858e-09	7.39231e-09
donor3_3.AGGTTTCACACACCTT.1	0	1.32055e-07	2.03333e-07	2.8814e-07	0.00254818	0.00236949	0.670325	0.0954444	0.229178	0.000134558	2.25245e-07
donor3_3.ATCCAGAGCAACAACC.1	0	7.28644e-09	2.0703e-08	1.02286e-08	0.0363733	0.00607814	0.761379	0.0655936	0.130576	1.77125e-08	9.45826e-09
donor3_3.ATTTGTCTTGGGAGCT.1	0	5.4437e-09	0.0241599	4.09612e-08	0.00938169	9.69981e-09	0.714795	0.074167	0.177494	2.46624e-06	3.7501e-08
donor3_3.CACACGCGCTGTCTTA.1	0	3.21477e-09	1.33048e-09	1.58997e-09	6.29455e-09	0.0031322	0.514541	5.04613e-09	0.449955	9.18856e-10	0.032372
donor3_3.CACCTAATCAGTTTAC.1	0	6.11168e-07	4.24795e-08	0.0447281	3.87669e-08	0.0218601	0.450375	0.119164	0.334077	8.31272e-08	0.0297954
donor3_3.CAGCTCACTGAGACAT.1	0	8.93969e-10	9.4469e-10	1.55351e-08	0.00744799	1.92942e-09	0.644019	3.02492e-09	0.263268	0.0212637	0.064001
donor3_3.CCCGACCATAGTCCGC.1	0	8.33122e-08	0.0172251	3.50505e-07	0.000762039	7.32847e-06	0.756973	0.116892	0.108139	2.07242e-07	5.32952e-07
donor3_3.CCTTCTTGATCCAGTG.1	0	1.51304e-07	2.53594e-08	5.71168e-08	3.77369e-07	5.71261e-08	0.546637	0.164656	0.288706	3.35681e-08	6.44398e-08
donor3_3.CTCCGCCCACATGAGG.1	0	2.53619e-06	3.49388e-08	0.239697	0.142773	0.047478	0.214058	0.052305	0.298235	5.32756e-07	0.00544953
donor3_3.CTTCTATTAATGCTAG.1	0	2.17678e-08	3.86108e-08	5.4199e-07	0.0220851	0.0400913	0.751752	0.0157816	0.166068	6.73868e-08	0.00422132
donor3_3.CTTTAACTTTCAAAGG.1	0	2.40897e-08	1.64034e-08	5.23986e-08	0.000597482	0.0421156	0.639143	0.028067	0.290076	1.53589e-08	5.66789e-07
donor3_3.GCATGAGGGACGCGGC.1	0	5.8481e-08	0.00868885	2.45065e-08	0.0183976	4.20604e-09	0.677736	2.03479e-08	0.295177	6.85175e-09	4.16264e-08
donor3_3.TACGACGCTTGCTGCG.1	0	1.26454e-07	1.08316e-08	3.18479e-08	4.93195e-08	4.24685e-08	0.703738	0.0747153	0.217379	1.87013e-08	0.00416684
donor3_3.TAGCCGGCGGTCAGCG.1	0	4.3632e-09	3.64743e-10	2.30909e-09	0.0133033	5.85075e-10	0.692936	0.0512446	0.242516	4.5822e-10	3.04025e-09
donor3_3.TAGGTGCTCGCCTAGC.1	0	7.59743e-10	0.00736973	2.60546e-09	1.02473e-09	7.71207e-10	0.78918	1.37037e-09	0.20345	1.68624e-09	8.21476e-10
donor3_3.TCACCGCTCGGCACTC.1	0	8.85729e-05	5.70509e-05	0.000132598	0.0146845	4.88633e-05	0.698144	0.000112918	0.286579	7.22638e-05	8.05029e-05
donor3_3.TCGTAAGACGACATTG.1	0	5.93097e-09	1.25136e-09	0.0331014	0.00474795	1.05999e-09	0.718103	0.116519	0.127528	9.29157e-10	2.3928e-09
donor3_3.TCTGTGCCATCATAGT.1	0	1.56657e-08	9.02367e-09	8.41969e-09	1.05099e-08	1.05246e-08	0.785598	0.108842	0.105559	6.47498e-09	7.82649e-09
donor3_3.TCTTGGTAACACCAAA.1	0	0.00270006	0.0455504	2.9957e-08	1.08016e-08	0.0254312	0.716607	0.0519038	0.154843	0.00296465	2.91345e-08
donor3_3.TTATCTGTATCATAAC.1	0	9.95541e-09	0.00833708	8.14347e-08	2.24895e-08	0.0220481	0.724512	0.0889853	0.148358	0.00153359	0.00622562
donor3_3.TTCTGCCGCGCCTAGA.1	0	1.49572e-09	0.0477385	0.0500638	0.037135	2.22443e-09	0.469568	2.54525e-09	0.376455	0.01904	3.8198e-09
donor14_1.ACAATTTGAGCAGTGG.1	1	4.69964e-08	3.31008e-09	1.11177e-08	0.00514919	0.0234293	0.90728	0.0317608	0.026522	4.37576e-09	0.00585854
donor14_1.TCCGTTTAGCCTTGAA.1	1	0.00711785	4.90693e-08	1.08018e-08	6.63544e-09	0.00519047	0.879929	0.0665624	0.0375972	0.00360326	1.87583e-08
donor14_2.CATACTTAGGCAATAC.1	1	1.57488e-08	1.32346e-08	0.000879321	2.0862e-08	0.0438844	0.907842	0.0233857	3.32381e-07	1.67608e-08	0.0240083
donor14_2.CGGGCCTTCTTTGTAA.1	1	1.62462e-08	7.01016e-08	1.38397e-08	2.21221e-08	0.0180054	0.77377	0.119495	0.0887295	1.94962e-08	3.81507e-08
donor14_2.TCACCCTCTTAAGATT.1	1	0.0183109	0.0128854	1.10224e-08	3.75518e-09	2.20082e-09	0.923982	0.00378196	0.0410399	4.21576e-09	6.48174e-09
donor6_1.ACGTTAGATTTGCCCG.1	1	3.08714e-09	1.14973e-08	2.99332e-09	6.24839e-09	2.63007e-09	0.865536	4.07752e-09	0.134464	1.9992e-09	4.49788e-09
donor6_1.ACTTCCATGCGGGACA.1	1	3.15952e-09	1.4133e-09	3.54208e-09	2.24236e-09	0.000706792	0.905261	1.73094e-08	0.094032	1.61699e-09	4.14147e-09
donor6_1.AGTGGCGTCTGAAGGT.1	1	0.00321006	1.23105e-08	6.19661e-09	0.0407429	4.97387e-09	0.687048	0.0535775	0.215194	2.03326e-09	0.000227911
donor6_1.ATTCCTCCGCCAGTGC.1	1	4.67126e-10	2.09318e-10	3.42706e-10	0.00750102	2.75074e-10	0.877142	5.16388e-10	0.115357	1.98727e-10	3.44283e-10
donor6_1.CCCGCCATGCTCCCGT.1	1	4.48853e-09	3.33029e-09	4.71898e-09	0.00319916	5.09819e-09	0.849482	9.95431e-09	0.147319	3.80241e-09	5.26883e-09
donor6_1.CTAAAGAATGCCTACT.1	1	2.38169e-08	7.99408e-08	1.61555e-08	3.90991e-08	1.52075e-08	0.883492	1.47374e-08	0.116508	1.601e-08	1.81378e-08
donor6_1.CTGTATGGTGTAGAAA.1	1	3.55831e-09	4.11689e-09	6.06308e-09	2.59037e-09	2.62232e-09	0.882727	5.55074e-09	0.117273	3.11834e-09	4.92521e-09
donor6_1.GAAACCGAATTACCTT.1	1	0.000157524	1.85538e-09	0.0114158	4.77724e-10	0.00455582	0.859637	0.072339	0.0518953	8.93973e-10	2.26488e-09
donor6_1.GAAGCTTGCTGACCGC.1	1	5.08896e-10	4.51549e-10	6.635e-10	3.88758e-10	5.33241e-10	0.934693	1.15556e-09	0.0653071	3.73185e-10	8.51324e-10
donor6_1.GACGAGGCTAATAAAC.1	1	1.56333e-07	3.22807e-06	9.68748e-08	0.0588407	0.0197297	0.796472	2.71822e-06	0.109049	1.06659e-07	0.0159025
donor6_1.GAGATGGGAGTCGACA.1	1	6.9027e-08	5.33398e-08	0.00959368	0.0494982	9.76279e-08	0.739401	0.0878344	0.113671	6.47716e-08	2.14946e-06
donor6_1.GATTGGGAAAGGTTGT.1	1	4.59144e-08	3.01945e-08	1.08067e-07	0.0502321	6.08911e-08	0.845644	2.27401e-07	0.104123	2.5955e-08	7.15126e-08
donor6_1.GCCCGCGCGTAAACGG.1	1	2.06712e-07	2.46003e-06	5.61514e-07	4.43523e-07	5.03815e-07	0.811433	0.0787631	0.109798	2.49149e-07	5.91554e-07
donor6_1.GCCTAGCGATCTGACC.1	1	5.60966e-08	1.42249e-07	8.61219e-08	1.28995e-07	1.67021e-07	0.844825	1.65268e-07	0.155174	5.42588e-08	9.2573e-08
donor6_1.GCGTGGTACTGGGTTA.1	1	2.82727e-10	0.0230527	2.34954e-09	0.029228	2.22345e-09	0.829896	1.93377e-09	0.117823	1.04291e-09	6.28602e-10
donor6_1.GCTCCATGCAAAGCAA.1	1	2.50931e-08	1.35058e-08	7.43166e-08	4.87432e-08	0.0370719	0.746115	8.68207e-08	0.216812	1.36916e-08	1.02363e-06
donor6_1.GGCAAATTACTTTACT.1	1	5.10586e-09	4.26603e-09	9.2038e-09	3.68488e-09	2.30334e-08	0.922354	1.36489e-08	0.0776456	5.25558e-09	7.084e-09
donor6_1.GGTCAAGACTACTTCG.1	1	1.53227e-09	4.67026e-10	6.99845e-10	0.0479305	5.25398e-09	0.792052	0.0265537	0.133464	3.05932e-10	2.00173e-09
donor6_1.GGTTTAGCCTTTCTTG.1	1	1.44792e-09	9.08142e-10	0.00326156	0.0599373	0.00846565	0.745563	0.0615148	0.121257	1.09159e-09	2.30407e-09
donor6_1.GTGGAGTCGGCGGTTG.1	1	0.0088566	0.0098933	0.0453456	0.0268124	0.00863316	0.718913	0.116526	0.0510729	6.73228e-08	0.0139469
donor6_1.TAACTATCGAAGGTCC.1	1	2.40069e-07	7.53877e-08	1.36334e-07	6.27012e-08	1.31951e-07	0.874574	6.38598e-07	0.125424	7.24101e-08	1.43099e-07
donor6_1.TAAGTCGCCGAGTATC.1	1	0.00104183	9.38986e-09	1.80587e-08	0.0549325	2.07067e-08	0.782422	0.0157844	0.145819	9.66073e-09	5.1672e-08
donor6_1.TATAGGGTACTCATGA.1	1	1.22858e-08	9.07415e-09	3.62787e-08	8.6863e-09	2.91979e-08	0.817755	5.9378e-08	0.182244	1.64043e-08	2.09276e-08
donor6_1.TTCAGTTCAAGAGGAG.1	1	3.87797e-10	5.35769e-10	6.20673e-10	1.89586e-10	4.85385e-10	0.962931	0.0185767	0.0184926	7.35124e-10	7.64456e-10
donor6_2.AAAGTGTGATTTATCT.1	1	0.000596071	0.0210376	5.49569e-07	2.95566e-07	0.0368909	0.845915	8.99532e-07	0.0955563	9.76234e-07	1.51075e-06
donor6_2.AACGTACTGTGGGTAC.1	1	0.000580749	0.00286792	9.62548e-07	0.00410104	5.16115e-07	0.885141	0.086184	0.0012154	2.75403e-07	0.0199079
donor6_2.AACTCCAGAGCGTGTT.1	1	0.00279689	0.0577565	4.30785e-07	0.0435003	0.0169957	0.832088	0.0468582	3.14239e-06	3.86541e-07	6.67176e-07
donor6_2.AACTCTCAGTGTGCTC.1	1	3.42758e-07	1.14802e-07	2.00836e-06	0.0491074	0.048271	0.698388	0.0833288	0.106306	1.09502e-07	0.0145964
donor6_2.ACAAGGATGCTTTAGG.1	1	6.05984e-09	1.38431e-08	0.00302226	0.0260988	5.46008e-09	0.853455	6.56769e-09	0.117423	7.97161e-09	7.31867e-09
donor6_2.ACTTCCATGCGGGACA.1	1	0.00278551	2.13623e-08	6.1483e-08	7.069e-08	4.73109e-07	0.91407	0.0305996	0.0525437	2.37382e-08	3.65637e-08
donor6_2.ATCGCCAGTCAACATT.1	1	3.79185e-09	0.0553564	0.0296984	1.13235e-09	6.17632e-09	0.78423	0.0748088	0.0559066	4.16976e-08	5.48078e-09
donor6_2.ATTGCTGCTCCTCCAT.1	1	2.76398e-09	2.8701e-09	1.07239e-08	1.88246e-09	4.94995e-08	0.909052	6.97043e-09	0.0909481	6.80985e-09	3.94181e-09
donor6_2.ATTTACTAAGTCCATT.1	1	0.00215692	0.0490473	1.62616e-06	0.00988105	0.00065203	0.735891	0.149732	0.0288469	0.0237886	1.99102e-06
donor6_2.CACATCTCACCGACGA.1	1	9.32653e-06	2.96366e-06	6.95823e-06	3.95105e-06	2.84975e-05	0.932914	0.000658033	0.0663534	1.40756e-05	8.45731e-06
donor6_2.CACTACGGGAGCTGCC.1	1	2.60749e-08	4.48694e-08	6.08702e-08	3.9288e-08	0.0209161	0.823797	0.0722317	0.083055	8.63713e-08	3.18561e-08
donor6_2.CACTCTCAAGCATCGA.1	1	3.34198e-08	1.39488e-07	1.13252e-07	0.0160101	2.07396e-07	0.868567	4.37291e-07	0.0948166	1.90693e-07	0.0206053
donor6_2.CCCATATAGGTCGATT.1	1	4.58391e-08	5.07144e-08	7.56529e-08	5.65666e-08	6.75989e-07	0.936984	0.0630143	3.04311e-07	1.07061e-07	7.74831e-08
donor6_2.CCGCCGTTGAGGATAA.1	1	3.63899e-08	7.03366e-08	2.71746e-07	1.8922e-07	4.61691e-08	0.737458	0.100235	0.162306	5.67762e-08	5.84942e-08
donor6_2.CCGTAAGTTGGTCCCA.1	1	1.11666e-07	0.0251233	0.000274529	1.41041e-06	2.78972e-07	0.931806	0.00830239	5.46392e-07	3.32613e-07	0.0344914
donor6_2.CGACAGTTCGCGTTAT.1	1	4.3634e-10	3.57431e-10	1.18691e-09	4.75549e-10	4.41266e-10	0.985503	9.07423e-10	0.0144965	3.8019e-10	7.83113e-10
donor6_2.CGAGAGCTTTCACTAC.1	1	7.56104e-08	0.0893303	2.82433e-08	8.74171e-09	2.7213e-08	0.818033	1.94547e-08	0.0348378	0.0577984	1.30216e-08
donor6_2.CGCATGCCGAATGCGT.1	1	2.3858e-09	1.30993e-09	9.77821e-09	2.54384e-09	0.0342757	0.749593	0.0267134	0.168922	0.0204956	2.72912e-09
donor6_2.CGGCCAGAGCGACCAT.1	1	1.10822e-07	0.0324675	2.0726e-07	0.00384197	0.0892059	0.654511	9.03439e-08	0.180366	6.50397e-08	0.0396073
donor6_2.CTCAAACCACTGCCCG.1	1	0.00175911	8.88095e-08	2.5082e-07	0.0168754	1.06493e-07	0.663858	1.77769e-07	0.317505	5.36381e-07	1.08926e-06
donor6_2.CTGGTTCGCGAGCTAC.1	1	3.46106e-07	6.76959e-09	3.63282e-08	0.0269701	0.000734794	0.774947	0.00271352	0.194635	1.23421e-08	1.35098e-08
donor6_2.GAAGCCACTGATTATG.1	1	2.84734e-08	0.0027385	8.37143e-08	6.68055e-09	7.17201e-08	0.699094	0.108441	0.105993	0.0371751	0.0465583
donor6_2.GAGCGGAATGCGGTGT.1	1	8.18485e-08	0.0101626	4.67243e-07	1.18594e-07	2.06997e-07	0.851866	1.82996e-07	0.127605	0.0103651	2.69061e-07
donor6_2.GCCTCCGACAATTCAC.1	1	2.80416e-08	1.82826e-09	3.8234e-09	0.0142162	8.83039e-09	0.916067	0.0155395	0.0541771	2.34017e-09	9.73853e-09
donor6_2.GCGAAGAATCTGACGG.1	1	0.018158	1.27288e-09	2.47375e-09	1.70842e-09	1.15243e-09	0.94368	2.48691e-09	0.038162	1.28923e-09	3.44403e-09
donor6_2.GCTAACTGAAGTCTGA.1	1	0.0104279	2.2626e-08	3.3575e-07	0.0207399	4.43233e-08	0.775067	0.139472	0.0396243	1.98379e-08	0.014669
donor6_2.GCTACAATCGAGGATA.1	1	9.36934e-11	3.61628e-10	1.68104e-10	0.00110959	2.94277e-10	0.903256	3.76599e-10	0.0956344	1.29665e-10	1.21289e-10
donor6_2.GGCGCTTCATTCCCTG.1	1	5.42843e-06	7.68943e-08	1.95021e-07	2.85527e-07	3.97289e-07	0.846199	5.8429e-06	0.153785	8.91814e-08	3.84181e-06
donor6_2.GGGAACGGGAGGTTAG.1	1	5.9091e-08	4.56429e-08	6.56312e-08	1.03244e-07	4.61095e-08	0.738325	8.84774e-08	0.261674	3.54389e-08	5.52084e-08
donor6_2.GGGCGGCAAATGAATT.1	1	3.17609e-09	7.42865e-09	3.7958e-09	3.60641e-08	6.01188e-09	0.841889	1.01729e-08	0.158111	1.75566e-09	5.46735e-09
donor6_2.GTCGTGTCTGGTCATC.1	1	3.81948e-10	0.0120106	2.13896e-09	0.118475	0.000979479	0.667943	4.62802e-09	0.187506	0.0130852	4.71613e-08
donor6_2.GTGTATATCAGCGGGC.1	1	6.51472e-08	2.41123e-08	4.16733e-07	1.16994e-07	0.0127441	0.834061	0.00872927	0.14002	2.71374e-08	0.00444473
donor6_2.GTTGCGCTAACATTAC.1	1	9.61686e-10	3.08142e-09	0.00599103	0.00218346	0.0701879	0.765115	0.0609075	0.0956153	5.96684e-09	2.84536e-09
donor6_2.TAACCTAGGGAGTCCA.1	1	4.56982e-08	4.33242e-08	3.82231e-08	0.0273229	8.96476e-08	0.691487	0.0255212	0.255669	3.40584e-08	4.21109e-08
donor6_2.TAATAGAACAGAGTTA.1	1	1.80007e-10	0.00590059	4.68776e-10	2.20385e-10	0.0186892	0.757423	0.038875	0.173631	0.00548089	2.95346e-10
donor6_2.TAATTACGTCAGTAGA.1	1	1.63984e-09	0.0137228	4.07647e-09	1.44598e-09	0.14966	0.767403	1.88644e-08	0.0452209	8.22796e-09	0.023993
donor6_2.TACGTAAAGCGGAGTG.1	1	7.38207e-10	8.63434e-10	1.65294e-09	1.2121e-09	0.0224534	0.758751	2.22048e-08	0.211906	1.0645e-09	0.00688962
donor6_2.TCTTTAGCAGGCGAAC.1	1	6.38271e-09	3.7029e-08	1.18827e-07	0.0624823	6.25495e-09	0.848817	1.84179e-08	0.0887009	7.65881e-09	3.54123e-08
donor6_2.TGCGACACCCTAGTGC.1	1	2.78443e-07	1.54018e-07	3.25412e-07	0.0444273	1.55669e-07	0.638674	0.138483	0.178415	1.94851e-07	2.34652e-07
donor6_2.TGGGCAGGCCACCGCA.1	1	1.21585e-06	0.00516787	2.38763e-06	0.0473831	0.0294374	0.64313	7.12072e-05	0.2748	8.37819e-07	6.79047e-06
donor6_2.TGTTCCGCTTCCATGA.1	1	1.70454e-07	5.99246e-05	2.19791e-08	7.38006e-09	3.84099e-08	0.93243	1.0908e-07	0.06751	1.61692e-08	1.628e-08
donor6_2.TTGGTTCGCTCAAAGG.1	1	1.09264e-07	4.64548e-08	0.190109	0.0182015	3.21482e-08	0.791689	1.0904e-07	2.876e-07	1.07657e-07	4.15608e-08
donor6_3.AACCGCTAAGGGATGC.1	1	4.19288e-09	0.0733495	0.0745452	4.23955e-10	1.89559e-10	0.834369	2.75842e-10	6.78871e-10	0.0177363	5.56047e-10
donor6_3.AAGATGGCACCGGACC.1	1	3.10311e-07	2.10406e-07	5.08129e-07	1.97979e-07	0.0113653	0.97635	4.16369e-06	0.0122789	2.08548e-07	5.10537e-07
donor6_3.AAGTTCAGTCTGCGTA.1	1	1.07974e-09	0.0090505	0.00419609	0.00619171	8.89208e-10	0.911927	0.0051007	0.029025	0.0110402	0.0234684
donor6_3.ACTCAATAAAGGCACG.1	1	4.04631e-08	5.43564e-08	7.85059e-08	0.0429525	2.14885e-08	0.885393	1.59706e-07	0.071654	2.76647e-08	7.09032e-08
donor6_3.AGCCAAGCTTTGTGTC.1	1	0.00941635	0.00800508	5.82973e-08	2.73368e-08	3.78136e-08	0.934616	1.81564e-07	0.0479617	3.71894e-07	7.19373e-08
donor6_3.AGTACATCATTTATCA.1	1	9.24737e-08	1.09923e-07	1.83355e-07	0.00962751	5.59151e-08	0.946867	0.0435041	2.89932e-07	1.24054e-07	4.39649e-07
donor6_3.AGTTGACGGTCCTTGC.1	1	0.00503504	2.65373e-08	5.98908e-08	0.0135248	2.83665e-08	0.8321	9.31268e-07	0.149339	3.48493e-08	1.16793e-07
donor6_3.ATACGAAGGCTTTCCA.1	1	0.00299121	0.0156928	1.49377e-07	1.05047e-08	8.57603e-09	0.927628	0.0286692	1.83106e-08	0.0250189	2.55592e-08
donor6_3.ATCTTGACTTGTCCAA.1	1	0.00900042	1.95569e-07	2.4826e-07	0.0318511	0.00295196	0.798259	3.46125e-07	0.121808	2.17259e-07	0.0361291
donor6_3.ATTAGGCGATGCTTTC.1	1	1.46336e-08	1.39838e-08	0.0218899	1.36793e-08	3.85672e-08	0.950552	0.0275581	1.47863e-07	2.90885e-08	3.77111e-08
donor6_3.CAAGCAACGTCGGAGT.1	1	0.00676402	3.83988e-10	1.13395e-09	7.01308e-10	4.37248e-10	0.781474	0.0496674	0.162095	7.97133e-10	1.5361e-09
donor6_3.CACTGACGATTGTGGA.1	1	4.37146e-08	2.18391e-08	3.34281e-08	0.0270091	1.05431e-07	0.882808	1.08471e-07	0.0901823	2.40973e-08	1.12531e-07
donor6_3.CCGCTTGCTGACATGG.1	1	8.68866e-09	0.095311	1.52825e-08	0.0490327	1.15331e-08	0.769952	4.76588e-08	0.0800672	0.00563738	1.1227e-08
donor6_3.CCTTTAAGGGAGCACT.1	1	0.00844164	2.86448e-08	1.29106e-07	0.0143957	0.00563032	0.90414	5.33509e-07	0.0643179	1.06132e-07	0.00307414
donor6_3.CGAAACGCAATTCATG.1	1	7.85797e-10	1.60667e-09	4.04615e-09	3.68815e-10	6.99142e-10	0.932952	0.0520717	0.0149768	7.87713e-10	2.31219e-09
donor6_3.CGACAATTTGATCTAA.1	1	1.14301e-08	6.27354e-09	1.29833e-08	1.19763e-08	1.39744e-08	0.933268	0.0154711	0.0512607	5.5176e-09	1.17191e-08
donor6_3.CGCGCATGTTTGATTG.1	1	3.57207e-08	3.6246e-09	2.58039e-08	4.02928e-09	3.49349e-09	1	6.94245e-09	2.60463e-08	4.00459e-09	4.19538e-08
donor6_3.CGCTATTCTTAGGCTC.1	1	7.29084e-10	1.21064e-09	1.3483e-09	0.00689144	1.99064e-09	0.903451	0.0364455	0.0532126	1.27365e-09	7.57365e-09
donor6_3.CTATAAGAGCCAATCG.1	1	1.58384e-09	0.0159002	2.87188e-09	2.18991e-09	1.29177e-08	0.923434	0.00381802	0.0568475	1.56471e-09	1.78122e-09
donor6_3.CTGCTTTATGTCCGCG.1	1	0.0137551	1.39887e-09	8.21598e-09	0.024108	0.00102819	0.948333	0.00172865	3.45282e-09	0.0110466	8.53956e-09
donor6_3.CTGGTAACACATAGAA.1	1	1.03429e-08	1.95595e-08	7.22363e-08	6.17967e-09	8.61165e-09	0.850557	0.0127335	0.136709	5.81547e-09	8.05399e-09
donor6_3.CTTTATCCGACGCATG.1	1	3.12057e-07	0.0115208	7.47781e-08	8.50004e-08	4.94905e-08	0.823223	1.80695e-07	0.165256	7.05351e-08	5.33754e-08
donor6_3.GCTCCATGAGTGCAGA.1	1	0.00376766	6.51018e-08	1.15581e-07	4.8474e-08	9.2537e-08	0.864119	2.38657e-07	0.132112	9.04702e-08	2.8165e-07
donor6_3.GGCACTCAGCCGACCC.1	1	4.61796e-07	9.0066e-08	1.73839e-07	4.01762e-08	2.27943e-07	0.729787	2.18542e-07	0.270211	4.2549e-07	2.06655e-07
donor6_3.GGGATTTACCGCACCT.1	1	0.00158853	6.21599e-09	1.08879e-08	0.0259808	4.24229e-09	0.73773	1.12083e-08	0.234701	5.63239e-09	2.1157e-08
donor6_3.GGTACACCAGATTTAT.1	1	0.00533858	0.00133725	1.13906e-08	0.0491463	2.95694e-09	0.768447	1.33e-08	0.175731	4.96048e-08	4.79863e-08
donor6_3.GTGTACGAACCGTTCC.1	1	1.43996e-09	3.85632e-10	1.15106e-09	5.91298e-10	6.2268e-10	0.930252	0.0437273	0.0260212	4.5503e-10	4.77313e-09
donor6_3.TAAGGCATAACATCAA.1	1	2.86507e-08	1.86383e-08	3.45861e-08	1.72795e-08	2.0299e-08	0.914239	6.02434e-08	0.0857605	1.99449e-08	4.59973e-08
donor6_3.TACGCAGTTCTTTCCT.1	1	9.41317e-09	5.55902e-09	1.48807e-08	5.89732e-09	1.30467e-08	0.892545	0.0182259	0.0827791	4.59477e-09	0.00644952
donor6_3.TACGGCATGGACGCTA.1	1	3.75306e-09	3.76685e-09	8.25234e-09	1.80967e-09	7.06329e-09	0.765909	0.062538	0.113765	0.0447122	0.013075
donor6_3.TCAACCATGTTCGGGC.1	1	5.23499e-09	1.55364e-09	2.39332e-09	3.58998e-08	2.47417e-09	0.982941	3.98203e-09	0.0170588	2.05921e-09	1.41837e-08
donor6_3.TCAGCGCACGCCGTTT.1	1	0.0814272	0.0259261	0.00621696	1.78321e-06	1.2626e-05	0.858316	0.0280971	1.63021e-06	3.0369e-07	5.7555e-07
donor6_3.TCGTACCGACGTCAAG.1	1	3.77307e-10	0.0301173	0.0237105	0.0236201	5.75305e-10	0.786203	7.6473e-09	0.136349	2.80766e-10	9.69325e-10
donor6_3.TGATCCCAGCATTAGT.1	1	7.33177e-09	1.12776e-08	5.58622e-09	0.0239919	1.96895e-09	0.933776	1.79094e-09	4.94813e-09	0.000633294	0.0415989
donor6_3.TGGGAAATGCCTTTCC.1	1	2.14142e-08	5.6726e-08	3.71975e-08	2.38251e-08	8.29446e-08	0.788686	0.151826	0.0594877	2.76421e-08	1.14894e-07
donor6_3.TGTACGAACAAATCCG.1	1	3.63289e-08	1.71063e-08	3.99602e-08	2.66084e-08	2.06471e-08	0.988113	7.49758e-08	0.0118867	2.54778e-08	2.97252e-08
donor6_3.TGTAGGAGAAATTTCC.1	1	9.44083e-10	1.92811e-10	2.78413e-10	0.0116701	1.50951e-10	0.856288	6.59071e-10	0.132041	2.1669e-10	5.28354e-10
donor6_3.TGTATGGCGCAGACAG.1	1	0.00262438	9.22674e-08	5.93822e-08	0.00219308	7.45489e-09	0.882065	1.02759e-07	0.113118	1.05859e-07	2.11889e-08
donor6_3.TTCGGCAACCCGCTGA.1	1	1.75907e-07	2.28808e-08	3.49602e-08	0.0134794	1.80421e-08	0.944595	4.12288e-08	0.0419257	2.84049e-08	5.24245e-08
donor4_1.ACCCGGATGACGCATC.1	1	0.00511398	0.0465771	2.2451e-07	0.00840991	0.0350644	0.829927	9.1036e-07	0.0726576	0.00224841	2.78711e-08
donor4_1.ATTAATGAACCAGTCG.1	1	2.23889e-08	2.69588e-08	3.22357e-08	7.73336e-08	3.5578e-08	0.857484	5.42494e-08	0.142516	2.33163e-08	2.82557e-08
donor4_1.TGCGTTTGTTGACACT.1	1	4.24841e-10	0.0110197	8.25976e-10	0.00471197	6.83223e-10	0.757915	1.64025e-09	0.226353	1.31319e-09	8.82702e-10
donor4_1.TTAACCAACCCTCCCT.1	1	5.77845e-08	8.48533e-08	1.13618e-07	1.17189e-07	0.00320808	0.9271	2.21087e-07	0.0696911	6.46836e-08	8.8002e-08
donor4_1.TTCGTAATCCCAGCGG.1	1	2.08648e-08	0.0653693	8.4685e-08	4.02205e-08	5.25841e-08	0.826078	0.00902748	0.0995254	3.10123e-08	3.13043e-08
donor4_2.AGGACGACCCATTAGA.1	1	1.09856e-08	0.0172757	1.68276e-08	2.18117e-07	0.00523924	0.87521	7.28305e-08	0.102275	1.36418e-08	1.66578e-08
donor4_2.GTCATTAGAGCGAACG.1	1	6.09662e-06	5.67085e-09	1.33011e-08	8.23458e-09	2.40697e-08	0.910887	0.00867086	0.0611249	5.96505e-09	0.0193109
donor4_2.TAGTTTATTCTTGCTT.1	1	0.00589269	0.011136	6.498e-10	0.0251625	3.68651e-10	0.854474	2.81281e-09	0.103335	3.14905e-10	2.47057e-09
donor4_2.TCATACTTACAGATCC.1	1	1.93227e-08	0.00967159	1.44798e-08	2.09637e-08	8.74523e-09	0.990328	9.97701e-09	1.28011e-08	8.68082e-09	5.28674e-08
donor4_2.TGAGCCATACAGTCTC.1	1	3.47723e-09	2.34692e-09	2.8594e-09	5.21492e-09	4.98646e-09	0.785858	3.74325e-09	0.214142	2.21027e-09	8.13577e-09
donor3_1.AATCGCCTCAGCGCCA.1	1	4.6607e-10	6.75032e-10	7.07455e-10	4.76525e-10	3.4108e-10	0.978241	1.61695e-09	0.0217594	3.62513e-10	3.02589e-09
donor3_1.AGATACCGGTGTTCAC.1	1	5.83249e-09	4.85947e-09	6.65419e-09	8.76689e-08	8.93142e-09	0.823276	2.03063e-08	0.176724	5.14515e-09	1.07218e-08
donor3_1.ATAGGGATATCCTTGA.1	1	3.29525e-08	4.27326e-08	6.35539e-08	8.59798e-08	5.1877e-08	0.907503	8.80482e-08	0.0924968	5.70541e-08	8.52938e-08
donor3_1.CAATTTCGTATAAGGG.1	1	2.23001e-07	1.27201e-07	2.05874e-07	1.63004e-07	1.5867e-07	0.951555	3.65543e-07	0.0484429	1.34443e-07	2.43299e-07
donor3_1.CCGACGGGCATGAGGT.1	1	0.0137027	0.00168867	9.9437e-07	0.000791341	5.75529e-07	0.704489	0.0597164	0.219604	7.3572e-07	5.1875e-06
donor3_1.CCTACTGCTTACACTT.1	1	6.48264e-09	4.59804e-07	1.28103e-08	1.31218e-08	1.83082e-08	0.7005	0.220974	0.0785246	9.0317e-09	1.80751e-08
donor3_1.CGTGCAGACTGGGACA.1	1	0.00531888	4.5961e-08	5.86204e-08	2.50238e-07	5.93636e-08	0.85837	1.10607e-07	0.13631	4.89697e-08	9.49289e-08
donor3_1.GAACGTTAGGAAGACG.1	1	0.0348516	5.7733e-09	1.23759e-08	2.32058e-09	1.64093e-09	0.78068	2.43257e-09	0.184468	3.86077e-09	9.45257e-08
donor3_1.GACTGCGGCACGTGTA.1	1	4.72395e-06	1.17782e-05	0.0497961	0.0472242	8.43507e-06	0.598415	0.0857906	0.208961	0.00978159	5.77531e-06
donor3_1.GAGTCCGCTTACCGGA.1	1	1.8178e-09	0.0201605	7.7777e-09	3.66906e-09	0.0458131	0.716665	0.0552151	0.162146	5.01425e-09	3.62035e-09
donor3_1.GCATAGAGCACTCAGG.1	1	6.88425e-08	9.39748e-08	8.63452e-08	8.43895e-08	1.66413e-07	0.85404	8.29788e-07	0.145958	3.934e-08	2.8579e-07
donor3_1.GCCTAGCGATCTGACC.1	1	0.0062935	8.03467e-10	2.28581e-09	0.0469599	1.14026e-09	0.662049	0.0149114	0.183985	0.0858017	3.2331e-09
donor3_1.GCTTGATGATAATCAG.1	1	6.78937e-09	1.00473e-08	1.05209e-08	3.65968e-08	1.10249e-08	0.8297	1.75269e-08	0.1703	9.25418e-09	1.41724e-08
donor3_1.TACATTTCTAACGTGC.1	1	1.00237e-10	2.55372e-10	2.03992e-10	1.84007e-10	0.00138389	0.851765	1.47529e-09	0.146851	9.23552e-11	1.30082e-10
donor3_1.TGTGACTACGCCAGTC.1	1	9.25479e-09	1.16601e-07	2.29522e-08	8.65965e-09	3.96719e-08	0.966251	5.55311e-08	0.0337486	1.26067e-08	1.12358e-08
donor3_1.TTATGTTTGCGATAGA.1	1	1.26892e-07	1.35237e-07	2.55356e-07	0.063447	3.60046e-07	0.623997	0.000710224	0.305882	9.60603e-08	0.00596303
donor3_1.TTGGAAGAATACAGTC.1	1	0.00279626	0.0125113	7.61317e-09	0.00881202	0.00524078	0.86876	0.0375608	0.0643186	5.45578e-09	9.48383e-09
donor3_2.ACAACGGTCCCTGCGA.1	1	0.00381243	9.72054e-10	1.05489e-09	1.44741e-09	4.88415e-10	0.964028	1.85827e-09	0.0321593	7.87316e-10	1.26645e-09
donor3_2.ATAGAGTACTGGGACA.1	1	1.87022e-09	1.91806e-09	2.4692e-10	4.02565e-10	3.51285e-08	0.903284	2.48397e-09	0.0967158	2.36398e-10	4.83543e-10
donor3_2.ATGACGCCGGCTCTAA.1	1	0.00763454	2.55529e-10	1.34493e-09	5.20498e-10	1.25667e-09	0.819982	5.57396e-09	0.172383	5.38157e-10	5.86605e-10
donor3_2.ATTGAAGATCTTAGTG.1	1	6.05641e-10	4.40558e-10	8.23877e-10	1.53409e-09	1.20741e-09	0.751396	0.103087	0.145517	5.22443e-10	7.15063e-10
donor3_2.CTCGATATTTGCGAGC.1	1	1.10428e-07	3.05639e-07	0.0156633	1.82776e-07	0.0197944	0.775845	0.0950674	0.0912529	0.00237621	1.16628e-07
donor3_2.CTGTACTTCTTAGCAT.1	1	3.46548e-09	0.00174821	1.16019e-08	1.89051e-08	0.0224538	0.802775	0.00576805	0.161512	0.00574292	1.34104e-08
donor3_2.CTTTGGCTTTAGTAAA.1	1	0.0281111	0.0095394	0.0650329	2.42595e-08	5.29811e-09	0.773592	5.93401e-08	0.112457	0.00942517	0.00184209
donor3_2.GATATGCGGTAGCCAA.1	1	2.54026e-08	6.20651e-08	3.01553e-08	0.0577462	0.00198424	0.709775	0.0361364	0.194358	2.75092e-08	1.91664e-08
donor3_2.GCAGATCCATAAGACT.1	1	0.00318882	6.16599e-10	8.86618e-10	0.000765975	5.19301e-10	0.944947	1.39401e-09	0.0510985	7.49097e-10	7.54717e-09
donor3_2.GCGAAGCCATACCCGT.1	1	1.91362e-08	3.93748e-08	2.42841e-08	3.64199e-08	3.69495e-08	0.778827	1.40012e-06	0.209236	1.43559e-08	0.0119347
donor3_2.GGAGAAGTCATTGGCA.1	1	1.61923e-09	1.39665e-09	3.56215e-09	2.25519e-09	2.90952e-09	0.857849	5.11786e-09	0.142151	9.35197e-09	2.25995e-09
donor3_2.GGATGACGCGAGTTTA.1	1	0.00463945	3.60244e-08	1.89172e-08	0.0124805	1.51235e-08	0.749703	0.0204655	0.190886	0.0114588	0.0103669
donor3_2.TAGGTGCTCGCCTAGC.1	1	1.60161e-07	9.07708e-08	8.73234e-07	0.00255629	9.99379e-08	0.887048	3.96025e-07	0.110394	2.55644e-07	1.19168e-07
donor3_2.TCCCGTCAGTCCCGCA.1	1	7.00263e-09	3.67962e-09	8.13763e-09	3.17385e-09	2.82376e-09	0.894369	0.0253096	0.0803213	3.87558e-09	5.44363e-09
donor3_2.TGCTCGGCGAAACCCA.1	1	0.00950781	4.89704e-08	1.55665e-07	9.29653e-08	1.42888e-07	0.96353	0.0127062	0.00777091	7.04927e-08	0.00648455
donor3_2.TTACCATTGATTACCC.1	1	0.00871435	5.57607e-10	1.07057e-09	0.0181593	2.98959e-09	0.777099	1.07172e-08	0.196027	4.99037e-10	1.70834e-09
donor3_2.TTATCTGTATCATAAC.1	1	0.00682253	2.67455e-07	3.92367e-07	0.0126335	0.00217794	0.779875	0.0378681	0.157065	4.95751e-07	0.00355663
donor3_2.TTCGACGGGAAGGGCG.1	1	5.47011e-09	1.18789e-08	2.62727e-09	1.97002e-09	2.15157e-09	0.927937	2.9622e-09	0.0720625	2.20212e-09	2.13002e-09
donor3_2.TTCGCACTCGCGTGCT.1	1	0.000135975	0.00352026	1.23418e-06	7.66172e-07	6.13374e-07	0.87767	9.11419e-07	0.0720856	0.0465838	6.94612e-07
donor3_3.AAACTCGGTTCGCAAT.1	1	0.00518305	0.0236412	1.23294e-08	9.07586e-09	8.03219e-09	0.941704	1.73885e-08	0.0230667	0.00640477	2.24593e-08
donor3_3.AACGATAATGCCGTAG.1	1	3.94678e-08	7.33053e-08	1.94262e-07	0.00698677	8.85323e-08	0.673543	0.110729	0.20874	1.58518e-07	1.07451e-07
donor3_3.AAGCGCAGGGCTTTGA.1	1	5.11572e-08	0.0110251	4.18571e-08	0.024427	1.13028e-08	0.807243	3.03082e-08	0.157304	5.99627e-08	2.15658e-08
donor3_3.AGTTAAGCGGTCCCGG.1	1	0.00498037	0.00593892	3.44884e-07	1.42847e-06	4.68071e-08	0.892026	3.85601e-07	0.0970525	8.92545e-08	3.52625e-07
donor3_3.ATATCAACCTACAGAG.1	1	0.00393722	5.8456e-09	7.49157e-09	5.49393e-08	3.01093e-09	0.933203	0.0158032	0.0470564	6.91457e-09	7.84694e-09
donor3_3.ATATTCAGTTAAACCT.1	1	9.77002e-10	7.11989e-10	1.56402e-09	0.00344672	1.66036e-09	0.882221	5.48609e-09	0.114332	9.65412e-10	1.50299e-09
donor3_3.ATCTAGCTTGTGAGGG.1	1	4.29397e-08	7.22415e-09	2.38742e-08	0.0586773	1.47716e-08	0.803312	3.95672e-08	0.138011	1.29819e-08	2.10961e-08
donor3_3.ATGGATCCGGCGTCCG.1	1	1.30367e-08	6.24746e-09	5.04375e-08	0.00347565	0.00161836	0.850891	0.0189672	0.109134	1.14304e-08	0.0159137
donor3_3.CAAGCGGCACATAATT.1	1	5.12338e-08	6.14244e-08	1.36855e-07	0.00126361	0.0049445	0.8009	2.00294e-07	0.181774	0.0111181	2.35445e-07
donor3_3.CACCCACGAGGCAATT.1	1	2.69325e-08	1.23367e-09	3.46292e-09	0.00506148	1.86649e-09	0.83181	6.54656e-08	0.163129	3.1436e-09	4.72875e-09
donor3_3.CAGCGATTCCCTTCAA.1	1	2.1161e-09	0.0295264	5.59749e-09	1.09589e-09	4.29479e-10	0.922983	3.01455e-09	0.047491	1.6412e-09	3.92312e-09
donor3_3.CATCTTACACCACCTC.1	1	0.00599813	2.21522e-10	5.62521e-10	6.71119e-10	5.84187e-10	0.810854	1.5122e-09	0.183148	2.64859e-10	1.18397e-09
donor3_3.CCGCTTACCTCACTCT.1	1	4.13196e-09	0.00777055	7.62625e-09	0.026708	4.75103e-08	0.776076	0.00565466	0.153805	0.000996643	0.0289894
donor3_3.CGCTATTCTTAGGCTC.1	1	3.57039e-10	0.00675408	2.02476e-09	0.00436054	1.24944e-09	0.883432	1.3945e-09	0.101062	0.00439091	1.20576e-09
donor3_3.CGGAAAGAATCAAACG.1	1	6.66863e-08	4.34753e-08	1.96242e-08	5.81962e-08	9.35322e-09	0.887616	3.95326e-08	0.112384	1.26574e-08	3.02517e-08
donor3_3.CGTGCCCTCCCGAAGA.1	1	9.48302e-09	0.00750174	2.42843e-08	3.79117e-09	1.91262e-09	0.825288	0.00743805	0.159772	3.55327e-09	7.70909e-09
donor3_3.CTCACTTGGCTGGTAA.1	1	0.0164885	4.87361e-08	1.45826e-07	0.0439469	9.25452e-08	0.793738	0.0135664	0.132257	9.15974e-08	2.24562e-06
donor3_3.CTTCTTACGTCGTATA.1	1	8.83652e-09	3.11454e-09	1.01017e-08	1.48129e-08	6.51378e-09	0.902745	0.0173941	0.0798607	8.65188e-09	8.54875e-09
donor3_3.GAATGTTGGGTAATCT.1	1	0.010478	1.07052e-09	1.50447e-09	7.82357e-10	5.0126e-09	0.85474	6.29756e-09	0.134782	7.01233e-10	1.53923e-09
donor3_3.GGCTCGCGTTGAGGTA.1	1	1.5868e-07	2.06447e-07	2.66111e-07	1.24455e-06	1.21133e-07	0.868718	6.31492e-07	0.131279	1.07679e-07	1.76392e-07
donor3_3.GTGTCGTATAGCGTTC.1	1	0.0198853	3.64464e-07	1.49203e-06	3.86882e-07	7.52168e-05	0.887685	1.69029e-06	0.0768293	1.84583e-07	0.0155214
donor3_3.TGCAGAACTATATCGT.1	1	4.54366e-08	2.63427e-08	4.74444e-08	7.46011e-08	3.27794e-08	0.933854	5.94462e-08	0.0661458	3.30721e-08	4.12028e-08
donor3_3.TTGGGAAGACGAGCCG.1	1	0.0100297	0.0212233	1.28925e-09	0.0151706	1.05708e-09	0.824671	0.00601379	0.122892	1.165e-09	3.36343e-08
donor14_1.AAATTACCTATCGATG.1	2	8.62811e-08	2.01151e-07	4.72672e-07	0.019748	1.28343e-07	0.900914	0.0209157	0.0501104	7.25175e-07	0.00831026
donor14_1.AAGGTGATAAACCAGC.1	2	0.0177333	0.0298792	0.0180965	0.10672	0.0906114	0.719981	1.96585e-08	0.0138478	1.33827e-08	0.00313044
donor14_2.CGGGAATATAGTATAC.1	2	1.53277e-08	0.0268223	0.011867	0.0134196	0.00938436	0.627321	1.3873e-07	0.0726072	0.238578	5.89387e-07
donor14_2.TTATATACGCTGTCAC.1	2	1.47908e-07	2.33268e-07	0.0656209	0.0445042	0.00586171	0.705307	0.0649766	0.0738514	0.0348389	0.0050386
donor6_1.AAAGTGTGATTTATCT.1	2	0.00109218	0.238759	0.145613	0.0305444	0.0451693	0.465826	0.0150849	0.0579111	5.72131e-07	8.20786e-08
donor6_1.AACCCGACAACCCGTG.1	2	2.4394e-07	5.45357e-07	0.144339	2.08479e-07	1.52112e-07	0.803913	0.0517448	9.53444e-07	1.80319e-07	2.88256e-07
donor6_1.AAGCGTCCCTCATCGA.1	2	3.93832e-08	0.331169	2.79803e-07	2.24659e-08	0.00841808	0.521407	0.0279824	0.0128163	0.0841885	0.0140183
donor6_1.AGCGGGTCTGACACTC.1	2	1.65976e-08	0.077763	2.86902e-08	0.0608569	2.35596e-07	0.656315	0.0774703	0.116582	1.8945e-08	0.0110134
donor6_1.AGTCCATTGGCTGATG.1	2	2.7682e-08	0.00267618	1.04347e-06	0.0676262	0.0232784	0.852107	0.0523512	0.00195968	2.73536e-08	4.96939e-07
donor6_1.AGTTTGGCCAGACCTA.1	2	2.44238e-08	0.144084	6.79285e-08	1.04103e-08	0.0281878	0.540604	0.0531535	0.0643079	0.169663	3.72863e-08
donor6_1.ATACTGCCTTACACCG.1	2	0.0299315	0.00748245	0.144662	0.0615779	0.0393844	0.547944	0.0911568	0.0778607	2.30538e-08	4.11755e-08
donor6_1.ATAGCAACTAGGGAAG.1	2	9.2779e-08	0.434689	5.13368e-07	2.29216e-07	1.80428e-07	0.427186	2.48419e-07	0.0339878	0.0558857	0.0482503
donor6_1.ATCAGCTCGTCCACTA.1	2	0.0196072	0.138244	0.013597	9.76033e-08	1.40121e-07	0.735992	0.0524395	5.76496e-06	0.0373628	0.00275184
donor6_1.ATGCCATTTGCGACCA.1	2	5.97015e-09	0.143697	0.13708	0.125628	4.01627e-09	0.400901	0.0180459	0.148794	3.06212e-08	0.0258548
donor6_1.ATGCGAGTCCCACCAC.1	2	1.54402e-07	1.93634e-07	0.279437	0.123295	0.140822	0.422323	1.7323e-07	0.0311472	0.002975	2.44349e-07
donor6_1.CAACCTACCGAGCAGT.1	2	9.8695e-10	0.22778	8.52655e-09	1.03218e-09	2.1091e-09	0.472543	2.39989e-09	0.0384756	0.261202	1.74888e-09
donor6_1.CACCTTGGCGCCTTTG.1	2	0.00683276	0.000494106	0.0851955	0.0811055	2.83926e-08	0.792996	6.09204e-08	0.0333758	5.6729e-08	4.55117e-08
donor6_1.GAACCTTTAACGATCC.1	2	1.84769e-09	9.52011e-10	0.00791951	0.0214864	1.59187e-09	0.833175	0.0530621	0.0843569	1.9045e-09	1.76452e-09
donor6_1.GAGCACCTGTGTCCAG.1	2	4.00291e-09	0.011518	0.0756623	0.0384131	0.00887257	0.694083	0.0371593	0.134292	4.83841e-09	1.23876e-08
donor6_1.GCAAACCTTGGCCATA.1	2	0.0111979	0.00516024	0.0528532	0.0288546	0.0338444	0.642878	0.0536152	0.150905	3.16171e-09	0.020692
donor6_1.GCGGTTCCCTATCATG.1	2	0.00638923	0.0301198	0.148268	0.0262403	0.0668521	0.534708	0.123886	0.0199578	4.38189e-08	0.0435787
donor6_1.GGTTAGTTACGGCGCC.1	2	5.88817e-09	3.06232e-09	0.248206	2.91584e-09	0.116873	0.286694	0.139643	0.208585	4.91096e-09	1.00557e-08
donor6_1.GTTCCGTCCGCCTGCA.1	2	0.143402	0.0706968	0.0708447	5.9249e-07	0.145949	0.511024	2.25763e-05	0.0472365	0.0108226	1.69206e-06
donor6_1.TAGACGCCCGTACCGG.1	2	4.25695e-09	0.0848054	0.114658	0.0642493	1.17234e-07	0.641068	0.0629064	0.0323123	2.12314e-08	2.24102e-08
donor6_1.TCCGCCTGTCTACAAG.1	2	3.9256e-09	0.157816	0.0876417	0.0257954	1.041e-08	0.427648	0.0993176	0.0821116	0.11967	3.55688e-08
donor6_1.TCCTTACGACGGTCCG.1	2	2.01005e-08	1.99662e-07	0.0188827	0.0260488	2.0298e-07	0.705768	0.0939959	0.155304	5.27198e-08	6.59148e-08
donor6_1.TCTGATGTATTCTGTC.1	2	0.00177791	0.00107633	0.291267	0.203612	0.009132	0.32486	0.0269595	0.0681282	1.09926e-07	0.0731867
donor6_1.TCTTCCCATGGGCACA.1	2	2.06338e-09	1.45889e-09	0.241957	0.109425	0.036687	0.504958	0.0533709	0.053603	1.56889e-09	3.57571e-09
donor6_1.TTAAACTCGAATTCAT.1	2	2.30962e-08	0.0996537	0.113582	0.119505	4.93664e-07	0.507385	0.0124038	0.147462	1.96026e-07	8.22778e-06
donor6_1.TTCGACAGAGCCCGTG.1	2	0.0260173	9.32514e-09	0.182515	0.00138167	0.0957571	0.627265	9.46163e-08	0.0670642	4.57585e-09	4.52583e-09
donor6_2.AAATAAGGTAGTGCCC.1	2	1.24676e-08	0.0211771	0.0369509	0.114506	4.23405e-09	0.638337	0.0654979	0.119294	0.00423664	1.25813e-08
donor6_2.AACATATCAACTGGTG.1	2	1.62737e-09	2.77921e-08	0.0809343	0.0477348	0.00812186	0.81776	3.36169e-09	0.0454491	2.20962e-09	2.24366e-09
donor6_2.AAGGTGATAAACCAGC.1	2	0.00306094	1.64068e-09	0.167466	0.0174682	3.19778e-10	0.591223	0.0666575	0.154124	3.78969e-10	7.09411e-10
donor6_2.AAGTGTTTGGAGACGG.1	2	0.00414367	0.112079	6.13161e-08	0.0430555	2.89803e-08	0.576164	0.130813	0.0521412	0.0816033	3.70954e-08
donor6_2.ACCTCCGTTATTCACC.1	2	1.69708e-09	0.134056	2.3057e-08	0.00551723	7.25915e-09	0.679873	0.0062374	0.138033	2.95832e-09	0.0362824
donor6_2.ACGCTAGTGATACACT.1	2	1.54563e-08	0.00434049	0.160393	0.072412	1.3843e-08	0.512519	0.143536	0.0753806	5.64105e-09	0.0314186
donor6_2.AGATAACTTCAGGGCC.1	2	5.79181e-08	0.0127978	0.299321	0.0410398	0.0178745	0.581733	4.09286e-08	1.94078e-07	0.0127481	0.0344851
donor6_2.AGCATATCAATATGCT.1	2	0.0220184	0.259954	1.2426e-09	4.47134e-10	3.7558e-10	0.600365	1.02059e-09	5.04362e-09	0.117662	6.29582e-10
donor6_2.AGCATTACGAGGCAAG.1	2	0.020338	0.153688	1.06569e-06	3.15657e-08	3.44559e-08	0.747084	7.54508e-08	0.0599221	0.0189671	1.8521e-07
donor6_2.AGTTTGGCCAGACCTA.1	2	9.49273e-08	0.467238	2.43913e-07	8.80101e-08	1.2048e-07	0.285688	1.02942e-07	1.5233e-07	0.247072	7.14504e-07
donor6_2.ATGCCATTTGCGACCA.1	2	3.59472e-08	0.0485615	0.127632	0.0344561	0.060556	0.544163	0.090697	0.0939342	7.30269e-08	4.18709e-08
donor6_2.ATTGTTCAACGATCCG.1	2	6.34545e-08	5.98985e-08	2.33292e-07	8.3205e-08	0.0912148	0.637006	4.4606e-07	0.271777	6.14704e-07	6.59941e-08
donor6_2.CAAGGTCCTATAGGCT.1	2	1.29857e-07	0.383166	0.00275283	3.00886e-07	2.86474e-07	0.488384	7.09013e-06	0.0323048	0.0933834	7.67723e-07
donor6_2.CCCTCCTCGCTCGTAT.1	2	1.40465e-09	0.0797587	3.80113e-09	1.08234e-09	2.37287e-09	0.651617	2.1052e-09	9.78393e-09	0.213383	0.0552418
donor6_2.CCTAGGCGTAGCGATC.1	2	5.9524e-07	0.0245553	0.225361	0.0192373	0.0467213	0.483777	5.89303e-06	0.194098	0.00624101	2.32276e-06
donor6_2.CGATGGACCCTACGCC.1	2	1.92913e-09	0.00350214	0.00678813	0.028444	1.36814e-09	0.718054	0.0296324	0.165376	3.68307e-09	0.0482036
donor6_2.CGGGAGCTTCAGTGTA.1	2	2.2546e-09	3.16404e-10	0.205424	0.0123492	0.0925367	0.51691	0.0489887	0.0857933	4.26596e-10	0.0379986
donor6_2.CGGTTATCCAACAGTG.1	2	0.00857352	5.9895e-07	0.153443	0.0750145	0.023736	0.613996	0.0332933	0.091942	2.53627e-07	2.20759e-07
donor6_2.CGGTTCAAGTAGGTGT.1	2	6.46255e-10	4.33961e-09	0.048601	0.0438241	0.0429892	0.810579	0.0148989	0.0298608	1.60009e-09	0.00924718
donor6_2.CGTCGGATAGTGTTGA.1	2	2.5725e-07	0.0304514	0.112082	0.0694615	1.90332e-07	0.637802	0.0100849	0.140117	3.9278e-07	3.43286e-07
donor6_2.CGTGTGTTAAACCCTG.1	2	1.02502e-08	0.0269088	0.158164	0.0647022	3.8822e-09	0.587615	0.137593	0.0250164	1.10983e-08	9.41927e-09
donor6_2.CTAGATGTGAGTGTAA.1	2	2.14655e-09	2.73904e-09	0.176985	0.0402542	0.0858858	0.51951	0.0534589	0.123906	2.57198e-09	2.72011e-09
donor6_2.CTGGCGCACAGGTCTG.1	2	1.09064e-07	3.62961e-07	1.9893e-06	0.0932907	0.0763482	0.745526	0.0622477	0.0225847	1.48098e-07	1.92425e-07
donor6_2.GAATGTGGTCCGGATT.1	2	0.00718125	0.147403	5.50908e-08	3.60206e-08	4.25717e-05	0.778068	7.63708e-08	0.0673053	4.96088e-08	1.22766e-07
donor6_2.GAATTTCTCGCTGCAG.1	2	7.99289e-11	0.254799	2.47339e-10	1.44522e-10	2.81254e-10	0.522769	2.42075e-10	0.172989	0.0386115	0.0108309
donor6_2.GAGAACGGTTCTGACT.1	2	1.0428e-08	0.209228	1.83044e-08	5.05723e-09	4.11315e-08	0.700874	1.48946e-08	0.0343344	0.0555631	3.68495e-08
donor6_2.GAGGCTATCAAAGTCG.1	2	0.0108888	0.0172138	0.101301	7.66583e-10	1.50915e-09	0.621748	0.0150274	0.228796	0.00502435	1.44763e-09
donor6_2.GATATGAGACACTAAC.1	2	7.77957e-10	1.19467e-09	0.0737942	0.0506325	5.49942e-09	0.79075	5.85001e-09	0.0848235	1.35073e-09	2.7807e-09
donor6_2.GCGCTGCTTTGCATTT.1	2	3.72947e-09	0.0316937	0.0636663	0.0705862	6.39386e-05	0.601678	1.40317e-08	0.217858	0.0144545	8.51283e-09
donor6_2.GCGTGGTACTGGGTTA.1	2	4.91121e-09	1.06415e-08	0.0783566	0.127677	0.0491047	0.656777	0.0095355	0.0785489	1.62427e-09	3.7896e-09
donor6_2.GCTAAGTAGTTTCTCT.1	2	1.0792e-08	0.03274	0.00509228	0.00475255	4.65831e-09	0.891356	3.02024e-08	0.0432586	0.0186301	0.00417031
donor6_2.GCTGTTGCTACCGAAC.1	2	2.01787e-09	0.037069	0.0615143	0.077667	0.0114741	0.599224	0.148618	0.0202598	0.00470173	0.0394717
donor6_2.GCTTATGAAGCAGGAA.1	2	3.26712e-09	9.81445e-10	3.93309e-09	0.0562057	4.31805e-09	0.909095	3.2339e-09	0.0346989	1.80584e-09	3.88982e-09
donor6_2.GCTTGGATCGATTAGG.1	2	0.0038441	1.39764e-09	0.0917326	0.0701906	5.90681e-09	0.6354	0.0685688	0.130263	1.35822e-09	4.9365e-09
donor6_2.GGTCGGATAAACGGCG.1	2	0.00463832	5.56924e-08	0.0551268	0.0690937	4.71838e-08	0.749474	0.0562928	0.055106	0.0102685	2.52415e-08
donor6_2.GTAAGTAACAGTCTGG.1	2	2.48067e-09	4.81664e-09	0.0152229	0.0485277	0.00924955	0.792623	0.00430511	0.130072	4.2238e-09	7.58108e-09
donor6_2.GTGCAGCGTAGAGTAG.1	2	0.063276	0.00409317	0.00328983	0.0278462	5.00997e-07	0.681747	6.72414e-07	0.219741	4.56944e-06	1.11703e-06
donor6_2.TCGGACGCCCAGCCCA.1	2	4.20277e-09	4.46341e-09	0.0102718	0.0325021	4.18969e-09	0.924084	2.21135e-07	0.0331419	4.50379e-09	8.75094e-09
donor6_2.TCTACCCAATAGAGAG.1	2	3.53532e-07	0.11484	6.07902e-07	2.86116e-07	3.46107e-07	0.485039	0.0328194	0.17128	0.153851	0.0421687
donor6_2.TGTATGGCGCAGACAG.1	2	1.73564e-08	0.0370486	0.150681	3.00154e-08	0.0249847	0.563626	0.0449055	0.175723	0.00303154	2.45584e-08
donor6_2.TTCCGGTTACCCACTT.1	2	3.36238e-09	0.00325862	0.0261198	0.0847366	9.13083e-09	0.59287	0.0559142	0.237101	7.65592e-09	8.67371e-09
donor6_3.AACGTGCGAAAGTCTC.1	2	8.54222e-08	0.00082194	0.0913558	1.64566e-08	1.4694e-08	0.790298	3.38917e-08	0.10709	0.000306358	0.0101278
donor6_3.AAGAGCTCTTTATCGG.1	2	2.73872e-09	1.85886e-08	0.099923	0.0213915	0.0215508	0.632374	0.0263955	0.156315	0.0420508	7.72555e-09
donor6_3.ATCGCTTTACGTCTCA.1	2	2.90614e-07	0.0486923	0.319582	1.79866e-06	3.4526e-07	0.576826	4.00562e-07	0.00776128	0.00441643	0.0427188
donor6_3.ATCTGGTTAAGACTGT.1	2	3.49005e-09	1.09326e-09	0.0741656	0.067737	1.62968e-09	0.806583	1.1828e-08	0.0515148	2.17664e-09	5.06923e-09
donor6_3.CAATAAACCTTGGCCC.1	2	0.0111444	0.0225502	0.0767847	0.00595505	8.12234e-08	0.863876	1.44474e-07	0.0196891	1.59429e-07	1.69219e-07
donor6_3.CAATCCCTATACCAGC.1	2	0.0134515	0.14497	0.25461	0.146235	5.55195e-10	0.3746	7.05129e-10	1.56674e-09	0.0122812	0.0538524
donor6_3.CATGACTTCGCTGAAT.1	2	0.015768	0.0213091	4.27148e-07	0.127727	0.00428681	0.524575	0.158186	0.0699752	0.0781722	8.76071e-08
donor6_3.CCACAATGTACGTCTT.1	2	0.0148221	7.37934e-08	0.0584213	0.0819116	5.89224e-08	0.816351	5.45034e-07	0.0284931	5.00098e-08	1.24214e-07
donor6_3.CTAGTTGGGCCCGGTA.1	2	2.82898e-07	0.0150013	0.0899196	0.00109691	1.00214e-07	0.740955	0.0186433	0.134383	8.3789e-08	2.59732e-07
donor6_3.CTTTAGGAACACTGTT.1	2	3.56084e-08	0.0230398	3.13218e-07	4.20664e-08	0.0414579	0.775921	0.0359068	0.123674	2.4091e-08	5.98289e-08
donor6_3.GACTGCACCAGCCCAG.1	2	0.00672188	0.00366548	0.130524	0.0218486	0.0337097	0.598737	0.0814274	0.111696	0.0116694	9.1241e-08
donor6_3.GCTGTATTACTGGCCC.1	2	3.85333e-09	0.0433846	0.0303415	1.58208e-09	3.68032e-09	0.730331	0.0391922	0.0562112	0.100539	2.18284e-09
donor6_3.GGATCCGGAATATACT.1	2	3.57976e-08	4.39697e-10	0.126168	0.0333975	5.59299e-10	0.550343	0.123975	0.166116	7.35762e-10	7.92551e-10
donor6_3.GGATGTCCTTACCGCA.1	2	8.81872e-09	0.0164528	2.46194e-08	4.2897e-09	0.0795973	0.903949	1.75428e-08	8.29211e-07	8.17938e-09	6.21832e-09
donor6_3.GGATTTCACTTCTATA.1	2	1.23888e-09	0.125288	0.0455794	0.0170941	1.51251e-09	0.607194	1.66819e-09	0.0514025	0.14525	0.0081921
donor6_3.GGTCTGAGAATCTGGA.1	2	2.13129e-07	9.4813e-08	0.151307	0.0272875	9.45479e-08	0.727546	0.00590449	0.0800079	1.8847e-07	0.00794633
donor6_3.GGTTTCAATCGGTCAG.1	2	3.01689e-08	7.43634e-08	0.113928	0.0619776	4.37131e-08	0.750853	2.51754e-08	0.0732414	3.20533e-08	3.6943e-07
donor6_3.GTGGTGGCCAAGTGAA.1	2	8.49194e-08	0.0736111	0.0552354	0.0500325	1.6127e-07	0.643897	0.073671	0.0877625	0.0157901	7.45248e-08
donor6_3.GTTCGGATCGGGAACA.1	2	2.60066e-06	0.278878	1.1222e-05	1.32307e-06	1.10175e-06	0.386582	1.68786e-06	4.96435e-06	0.334515	1.99432e-06
donor6_3.TACGTGCAAGGTTCCT.1	2	0.000293146	0.0709852	0.122446	0.0273531	1.12478e-07	0.631559	3.79888e-08	0.104964	0.00390061	0.0384984
donor6_3.TCAGCAAATGCATCTC.1	2	2.51183e-08	1.49474e-08	0.155931	0.0293538	2.29977e-08	0.682111	1.46453e-07	0.119816	1.72934e-08	0.0127884
donor6_3.TCCGATAATTGCCATA.1	2	3.79465e-08	0.0404271	0.141023	0.110159	3.10889e-08	0.617751	4.95752e-08	0.0906394	5.7962e-08	2.36766e-08
donor6_3.TCGCCGAAGTTGCGTC.1	2	5.43289e-06	0.216809	0.00757572	6.52381e-08	1.84154e-07	0.649967	5.31773e-07	0.104088	0.0186096	0.00294407
donor6_3.TCGTAAGACGACATTG.1	2	3.54014e-08	0.0103216	0.00109471	0.0226784	0.00622306	0.853032	5.81613e-08	0.0936811	0.0116504	0.00131907
donor6_3.TCTGTGCCATCATAGT.1	2	0.0357537	2.74545e-08	0.19963	0.0220023	0.0166026	0.654747	4.68243e-07	0.0712637	6.22475e-08	1.55461e-07
donor6_3.TGAGAATGCTTTACCG.1	2	0.0106992	1.21325e-09	0.00496816	6.32653e-10	0.261718	0.611939	2.78899e-09	0.0652611	0.0454144	4.48523e-09
donor6_3.TGCGGAGTAAAGGTGC.1	2	0.00205145	0.0533652	0.0565425	0.026008	2.71253e-08	0.605061	0.0541755	0.202796	4.87167e-08	2.30409e-07
donor6_3.TGGAACCACTGACACA.1	2	8.07104e-09	0.0526216	4.92897e-09	0.0337906	4.7965e-09	0.878931	5.00572e-09	1.91412e-08	0.0346564	2.76902e-08
donor6_3.TTATGATCTTAACGAA.1	2	0.00929702	2.11952e-09	0.307022	0.0175921	0.0261591	0.601054	3.77157e-09	0.0388751	1.07734e-09	2.52922e-09
donor6_3.TTGACCATGTTCTCCG.1	2	9.29572e-09	0.0454276	2.27788e-07	0.0242764	7.50876e-09	0.875495	1.2442e-08	2.82793e-08	0.0548011	2.66389e-08
donor4_1.AACCGCTAAGGGATGC.1	2	1.90269e-08	0.465102	2.8647e-09	1.8668e-09	0.0534335	0.259608	3.48456e-09	0.0288853	0.192971	3.21314e-09
donor4_1.AACTCCTAATCCCATG.1	2	1.09608e-07	0.0352605	0.0866705	0.0232814	0.029368	0.678851	0.0833224	0.0632461	8.04068e-08	1.21827e-07
donor4_1.CTGCGGTAGTCACGTG.1	2	3.93115e-07	0.0363264	0.0947161	0.00966943	0.00994787	0.80128	6.31841e-07	2.77951e-07	0.0480588	5.03048e-07
donor4_1.CTGCGTTACGATATAA.1	2	0.0103976	0.106862	0.0636721	0.0404379	0.108646	0.533976	0.079274	0.0515647	0.00516946	1.36431e-07
donor4_1.GCTAGTAGAGCTTGTA.1	2	7.07385e-10	0.147673	1.22798e-09	1.04302e-09	9.80121e-10	0.505797	1.74244e-09	0.0372212	0.309309	1.34492e-09
donor4_1.TAGTCTGTGACGTTGC.1	2	2.77642e-08	4.90509e-08	5.72752e-08	8.56454e-08	0.0409853	0.861464	2.02891e-07	0.0876802	7.37679e-08	0.00987015
donor4_1.TTCCATCATGCGGTGA.1	2	2.93047e-07	0.0088486	0.282405	3.99378e-07	4.11154e-07	0.683794	5.91295e-07	4.50801e-07	0.0249496	5.98005e-07
donor4_2.ACGTACAGATTTCTCT.1	2	0.00523127	0.346888	2.54919e-08	0.0134725	6.43882e-09	0.507984	7.87573e-09	0.0982458	1.20956e-08	0.0281788
donor4_2.AGGGTTCCCTTTGGTT.1	2	1.51165e-08	0.279629	0.427358	2.61642e-08	0.00693634	0.248072	8.93515e-09	8.67362e-09	5.23346e-08	0.0380043
donor4_2.ATTGGGAATATCTTGG.1	2	9.54481e-10	0.00917151	0.0193728	0.0408854	2.544e-09	0.751573	0.0385988	0.140398	8.41896e-10	2.87746e-09
donor4_2.CACGCGGAACTGTTGC.1	2	8.27473e-08	0.0117708	0.196474	3.97793e-08	6.92914e-08	0.56771	2.04657e-07	0.0435614	0.142113	0.0383703
donor4_2.CCCGCCATGCTCCCGT.1	2	1.95975e-09	0.34587	0.0283925	1.45873e-09	2.994e-09	0.518687	4.60539e-09	1.8611e-08	0.107051	4.89168e-09
donor4_2.CTAAATCCTATTCCGG.1	2	0.000611191	0.0592545	0.0914068	8.12702e-07	8.89554e-08	0.615936	3.72721e-07	0.0328445	0.199945	2.30615e-07
donor4_2.CTCACATTTACTAAAT.1	2	1.71143e-07	0.471231	1.92008e-07	3.22944e-07	1.18173e-07	0.0469035	1.32684e-07	1.44836e-07	0.481864	4.63156e-07
donor4_2.CTGAAAGAGATCCGAC.1	2	2.37736e-08	0.140819	0.0209216	0.0165461	0.069383	0.655724	0.0252957	0.00739834	0.0293403	0.0345724
donor3_1.ATGTGAAAGCCTAATG.1	2	0.0210017	2.38114e-09	0.0436461	1.56679e-09	0.163506	0.666596	2.72194e-09	0.105251	1.2224e-09	1.48836e-09
donor3_1.CGCCTCCCTCCTCTAT.1	2	5.06864e-09	1.41796e-09	2.53702e-09	5.42311e-09	2.44193e-09	0.695407	4.58176e-09	0.304593	1.88555e-09	1.77515e-09
donor3_1.GTGAGGACACTTAAGG.1	2	0.000501356	1.30501e-08	2.83758e-09	2.83194e-09	1.99198e-09	0.949091	6.50742e-09	0.0504076	4.80521e-09	4.25007e-09
donor3_1.TAGGTGAGCCCTACTC.1	2	2.2684e-09	0.0195937	2.60991e-09	0.0213924	0.0130925	0.756978	1.21903e-08	0.188347	0.000595961	1.49131e-09
donor3_1.TCGGACGCCCAGCCCA.1	2	2.70842e-08	0.00835956	0.0348251	1.09479e-08	1.04764e-09	0.699751	1.94601e-09	1.81459e-08	0.229565	0.0274984
donor3_1.TGGCAGCAGTAATAGT.1	2	5.26117e-08	2.3727e-07	2.05562e-07	4.26535e-07	0.12581	0.820794	4.68269e-07	0.0533939	6.45249e-08	1.08744e-07
donor3_1.TGTTTCGGTACTTCTC.1	2	6.68686e-08	0.118507	0.0587114	0.0583264	2.93743e-08	0.433678	1.74984e-08	0.0498059	0.280972	2.26047e-08
donor3_1.TTCGACGGGAAGGGCG.1	2	5.82395e-09	5.78893e-09	1.63139e-08	0.0544811	0.0593625	0.70717	0.0605661	0.11842	7.83658e-09	9.85364e-08
donor3_2.CATTTGAGTGGTACGT.1	2	1.76891e-09	0.0038226	5.38764e-08	0.0245962	1.42326e-09	0.400469	1.22487e-09	1.97661e-09	0.571112	2.61247e-09
donor3_2.CCAAGAAAGTGGGCGA.1	2	4.64295e-08	2.70103e-08	0.0183126	0.0695053	0.00176158	0.695681	6.3627e-08	0.194984	2.71535e-08	0.0197548
donor3_2.CCAGCCTGGACCAATA.1	2	1.46201e-09	0.152019	5.93065e-09	0.0599356	0.0259532	0.455118	0.0702941	0.232154	0.00452714	1.00407e-09
donor3_2.CCGTGGAACGATCCAA.1	2	7.94549e-09	0.158481	0.073661	6.67012e-10	8.93205e-10	0.419477	1.68636e-09	0.00697494	0.341406	2.02778e-09
donor3_2.CGACACGCTCCGACAG.1	2	1.52724e-07	0.00874762	0.0352882	0.0344198	0.0200094	0.685018	9.93755e-07	0.216516	1.70033e-07	9.97505e-08
donor3_2.GGAGACGACACCTTTG.1	2	1.27705e-08	5.25016e-09	4.62789e-08	0.00198582	0.130277	0.746773	0.0214118	0.0995521	1.83511e-08	9.17069e-09
donor3_2.GTATGTGGGTCTAGTT.1	2	2.81015e-07	0.10263	0.273733	0.0285017	0.0251501	0.346625	5.74487e-07	0.16701	0.056349	2.90468e-07
donor3_2.TCCAGAGCACCGGTTC.1	2	9.09446e-09	0.0262913	0.0641219	0.0614958	1.42992e-08	0.639523	3.32604e-08	0.194179	0.0143891	3.37075e-08
donor3_2.TGATTCGTCTATCACT.1	2	0.0107125	0.0184716	0.00934032	0.0605123	0.0189448	0.632035	2.06225e-07	0.249983	3.43854e-07	2.91505e-07
donor3_2.TTGCTGATCATGTTCG.1	2	1.48571e-07	0.0787093	0.0438078	0.0139578	0.00601315	0.683462	0.0156848	0.158364	7.12158e-07	2.18335e-07
donor3_3.ACTGAATGGCGAAAGT.1	2	0.00503468	0.200804	1.54162e-06	4.98528e-08	1.7601e-08	0.531054	2.71148e-08	1.00421e-07	0.263106	6.41806e-08
donor3_3.AGGCAGGGAGCGTACT.1	2	7.98918e-10	0.0166379	6.16581e-09	0.0229064	0.0602981	0.619356	0.0264346	0.253382	1.26538e-09	0.000984461
donor3_3.CACTGACGATTGTGGA.1	2	2.08148e-07	0.0702776	0.222902	0.034171	1.18184e-07	0.587584	1.34195e-07	0.0279847	0.0570807	1.74111e-07
donor3_3.CAGAGGCGATGCATGA.1	2	8.15312e-08	0.00388292	2.01365e-07	0.0427175	1.02075e-07	0.770796	0.045135	0.128241	0.00922692	6.43956e-07
donor3_3.CCATTTCTACCTATTA.1	2	0.00354302	0.0950422	0.0326291	0.00927147	5.97785e-08	0.837179	2.23903e-07	0.0223348	1.21732e-07	7.76716e-08
donor3_3.CCCAACATACGTCGCG.1	2	2.03998e-08	0.105424	1.13338e-05	2.33431e-08	1.41289e-08	0.747621	5.39791e-08	0.0515623	0.0953813	2.95929e-08
donor3_3.CCGAACCTTCCCGGCC.1	2	2.27702e-06	0.0178893	0.0571616	6.24135e-06	0.0683164	0.738602	1.05062e-05	0.117995	3.95323e-06	1.32062e-05
donor3_3.CGTCGTCCTTCGCGAA.1	2	6.96013e-07	2.91976e-07	3.3395e-06	0.0176213	0.00691674	0.684017	4.22526e-06	0.246745	0.00450541	0.0401867
donor3_3.CTGCACCTGGAACCGC.1	2	0.00435677	0.0429977	0.0846928	0.0382762	6.72023e-10	0.668123	1.03541e-09	0.152437	1.70293e-09	0.00911677
donor3_3.GGTTACCACCCTCGGG.1	2	1.80332e-09	0.013738	0.0665031	0.0575465	0.0144891	0.583674	5.86621e-09	0.204312	0.0597369	1.31742e-09
donor3_3.GTCATGGACATGACTA.1	2	1.46227e-08	0.091936	5.63306e-08	1.83695e-08	2.34128e-08	0.748403	3.8758e-08	0.15966	2.98993e-08	2.07728e-08
donor3_3.GTTAACATCACTTAAA.1	2	5.61403e-10	0.0473607	0.212176	3.70567e-10	1.77731e-10	0.694864	2.73335e-09	0.0456002	1.29043e-09	3.73718e-10
donor3_3.TGAATGAGTGTTTCCC.1	2	3.40313e-07	0.116156	0.0867109	2.68868e-07	1.28929e-07	0.493006	2.50265e-07	2.21035e-07	0.304125	3.02557e-07
donor3_3.TGGCCGTATATTGACC.1	2	1.98976e-08	0.119594	0.263257	0.0520452	2.09339e-08	0.528357	6.49119e-08	0.0264096	4.09787e-08	0.0103368
donor3_3.TTCGCGCGCCATACGA.1	2	2.1161e-08	0.0257981	2.7515e-07	0.0438222	0.00743124	0.675453	1.62066e-07	0.24002	2.85021e-08	0.007475
donor14_1.GAGATCTGTCACTCCG.1	3	7.27142e-09	0.00201565	1.17669e-08	0.0122531	9.45057e-09	0.955631	6.42496e-08	0.0301003	9.50384e-09	1.7026e-08
donor14_1.TATGGGTACGTATCGT.1	3	5.93301e-09	6.79079e-10	3.50234e-09	3.22337e-10	5.55789e-10	0.917808	0.0821924	7.26705e-09	9.62101e-10	5.88784e-10
donor14_2.ATAGTTCCACCCACTC.1	3	3.11263e-09	3.6749e-09	6.92471e-09	0.00221189	1.17874e-08	0.913789	0.0765444	0.00745484	1.9903e-09	3.4621e-09
donor14_2.TCCGATGACTGAGCTC.1	3	7.51841e-09	0.0128922	1.35949e-08	0.0513561	0.00200183	0.84591	0.00607994	0.0783255	0.00343437	7.60532e-09
donor14_2.TGCTAAGTGTCTATTT.1	3	0.00181464	2.18779e-07	0.0889029	6.48288e-07	1.76092e-07	0.849477	0.0598024	1.00249e-06	3.41361e-07	4.64138e-07
donor6_1.AACGGACGTACGTATA.1	3	0.0062416	4.20104e-09	3.25608e-08	0.0393137	0.041553	0.848732	0.0641595	6.0279e-09	5.51937e-09	1.43941e-07
donor6_1.AAGCATACTCTCCTGA.1	3	1.87251e-07	0.00190816	1.16176e-05	7.40145e-08	0.00779945	0.914051	0.069255	0.00249311	8.06897e-08	0.00448174
donor6_1.ACAAGGATGCTTTAGG.1	3	8.38384e-10	6.47961e-10	3.40415e-09	2.78519e-09	3.30955e-09	0.876816	0.0382666	0.0849172	5.08757e-10	9.93611e-10
donor6_1.ACAGCGACATTCTCAT.1	3	1.65154e-08	2.193e-08	2.43211e-08	0.0472621	6.21223e-08	0.86951	0.0306057	0.0526218	6.34815e-08	3.30853e-07
donor6_1.AGATTCACAACCGATA.1	3	5.37509e-09	4.12477e-09	9.35619e-09	8.41757e-09	0.0330568	0.871729	0.0467571	0.0484569	4.83585e-09	2.58303e-08
donor6_1.AGGCCACCCGTTATGA.1	3	4.00967e-10	7.9437e-11	1.22954e-10	3.15302e-10	8.3104e-11	0.926747	1.47742e-10	0.0674467	1.14882e-10	0.00580647
donor6_1.AGGCCTGAGAATCTCG.1	3	0.00401499	1.50216e-06	1.57893e-05	2.88521e-07	0.0304854	0.918071	0.0474069	2.45967e-06	6.78544e-07	6.98187e-07
donor6_1.AGTATACACAGCGACA.1	3	2.5199e-08	0.00327197	5.3842e-07	0.0536281	1.08135e-07	0.79819	0.124976	0.0187565	0.00117698	6.43956e-08
donor6_1.ATAAGGTGGAGAACAT.1	3	1.19185e-07	5.33408e-08	1.10958e-06	0.0610306	1.2358e-06	0.71887	0.119856	0.100241	4.6195e-08	1.8614e-07
donor6_1.CATAACGGACAGTCGT.1	3	9.37013e-09	2.58719e-08	0.00685245	0.0533689	8.34051e-09	0.824494	4.44129e-07	0.115283	1.42946e-08	4.02048e-07
donor6_1.CATCCTCTCAAAGATC.1	3	0.00802458	6.16447e-08	2.05623e-07	0.0486933	1.24825e-07	0.830233	0.0843542	0.0286938	1.01652e-07	4.90512e-07
donor6_1.CCAGAAAGCAACTCAT.1	3	1.25406e-10	2.47979e-10	3.55905e-10	5.07448e-10	1.91808e-10	0.958378	0.0137635	0.027858	2.71789e-10	1.09316e-09
donor6_1.CCGGCGTGAGACTCTG.1	3	1.47678e-07	2.85836e-07	3.00454e-07	9.40474e-08	1.45643e-07	0.915843	0.00282603	0.0813294	1.60166e-07	2.03822e-07
donor6_1.CCTTCTCAGCGTTCCT.1	3	4.37469e-09	0.0131414	4.73091e-09	1.76506e-09	8.22103e-10	0.808425	0.0688498	0.109584	2.91569e-08	6.51915e-09
donor6_1.CTAACTGATAATCGCC.1	3	0.000332143	3.17224e-08	4.2505e-08	0.0274373	0.0311091	0.671729	0.175956	0.0934367	1.25141e-08	9.19123e-08
donor6_1.CTATGGGAAGCGGAAT.1	3	6.83104e-08	1.79467e-08	2.41669e-08	0.0287154	0.0120311	0.919584	0.0142257	0.0254436	7.03721e-09	2.03049e-08
donor6_1.CTCCTCCAGCTCACAC.1	3	1.16668e-09	7.3852e-10	1.70012e-09	0.0159963	0.0531077	0.744546	0.108492	0.0405528	1.04156e-09	0.0373054
donor6_1.CTCTTGTCCCGCTTGG.1	3	1.06183e-07	0.0203248	3.15645e-07	0.0293297	1.05234e-07	0.793676	0.078019	0.0786494	3.74252e-07	4.66244e-07
donor6_1.GAACAGATTACTAAAT.1	3	8.26885e-10	5.33168e-10	0.0176187	0.0756299	6.53691e-10	0.607476	0.145843	0.153433	1.16857e-09	4.07348e-09
donor6_1.GACTAGGCCGTTAGGT.1	3	0.00080482	4.24556e-09	5.80009e-09	1.66135e-08	5.15872e-09	0.945929	0.0267924	5.61231e-08	3.69248e-09	0.0264734
donor6_1.GCCAGGAAAGAACACT.1	3	3.0235e-08	1.50186e-07	2.08062e-07	0.00183471	0.0264408	0.917852	0.0135066	0.024509	6.83341e-08	0.0158561
donor6_1.GGGCGGGTTCCCTACG.1	3	1.20295e-08	7.98333e-09	8.82107e-09	9.06642e-09	9.61726e-09	0.974964	1.46629e-08	0.0147596	4.82481e-09	0.010276
donor6_1.TACGCCTCCATTCCGA.1	3	3.56498e-10	2.44972e-10	1.81116e-09	0.0389297	9.9025e-10	0.661515	0.097113	0.187914	0.00704375	0.00748533
donor6_1.TATGGGACCGAGCAGG.1	3	2.24003e-09	1.21645e-09	2.53081e-09	3.98301e-09	1.85781e-09	1	2.56841e-09	6.4038e-09	1.1952e-09	2.40298e-09
donor6_1.TCCGGTTCGTCCGGTC.1	3	9.86684e-08	8.91192e-08	1.79253e-07	0.0147614	1.44739e-07	0.749439	0.025607	0.210191	6.02075e-08	2.51479e-07
donor6_1.TCTGAATTCCGTACAA.1	3	1.90011e-08	0.0212232	0.0198631	0.0595462	2.6741e-08	0.687926	0.132948	0.0685299	5.64098e-09	0.00996286
donor6_1.TGCGAATATGGGATTT.1	3	0.000678017	2.28619e-09	2.28587e-09	4.25965e-09	1.83984e-08	0.768123	0.15085	5.69517e-09	2.26063e-09	0.0803495
donor6_2.AAACGGTTGCGAACTG.1	3	2.43383e-10	2.60439e-10	1.75288e-09	2.1717e-10	0.0347113	0.961887	0.000484206	0.00291719	8.65366e-09	3.72344e-10
donor6_2.AATCGTGAGCCGAGCA.1	3	7.2697e-07	4.43937e-07	6.13689e-07	3.06536e-07	1.1089e-06	0.930258	0.0244296	0.0382535	8.2806e-07	0.00705529
donor6_2.ATAAATATTAGCAGCT.1	3	0.0109981	0.00839322	6.81404e-09	0.0122547	0.0140556	0.830965	0.028291	0.095042	3.79762e-09	9.33697e-09
donor6_2.ATCCTGCGTGGAATGG.1	3	1.26007e-09	3.97564e-08	9.17496e-10	0.00283523	6.50572e-10	0.880396	3.25104e-09	0.0903258	6.2241e-10	0.0264429
donor6_2.CATCCTCTCAAAGATC.1	3	8.42447e-09	6.85436e-09	1.66461e-08	2.16014e-06	1.55277e-08	0.990355	7.83503e-08	0.00964315	3.26379e-08	2.03344e-08
donor6_2.CCACGGTGCCCGGTAG.1	3	6.9743e-08	5.42315e-08	3.23674e-07	0.00994898	0.027267	0.90731	3.99043e-07	0.0554732	1.05606e-07	3.79987e-08
donor6_2.CTAGGCGCCCTATCAG.1	3	7.11228e-08	0.0392552	2.65622e-07	0.0219195	1.94052e-07	0.753213	0.0324289	0.129401	0.0237823	1.2283e-07
donor6_2.CTCGATATTTGCGAGC.1	3	2.26356e-10	0.0367412	0.0135726	0.0443119	3.23883e-10	0.727178	0.00984597	0.161526	3.14731e-09	0.00682451
donor6_2.GAGCACCTGTGTCCAG.1	3	1.86062e-08	3.16167e-08	1.16228e-07	0.0020301	2.24362e-07	0.900475	0.0684407	1.03672e-07	2.7394e-08	0.0290537
donor6_2.GCAGTGCGGGCGGATG.1	3	9.90081e-08	0.00100621	2.64366e-07	9.30133e-08	0.023981	0.943748	0.0302126	0.00105117	1.61945e-07	4.26681e-07
donor6_2.GGCAGCAAACCTATGC.1	3	1.56309e-09	7.59763e-10	1.69841e-09	5.96274e-10	0.0117491	0.839737	0.098032	0.0504816	5.44257e-10	3.09843e-09
donor6_2.GGTACCATTAAGACGG.1	3	5.05271e-09	5.32429e-09	1.06851e-08	0.0354437	4.49437e-09	0.704882	0.11735	0.115934	3.29452e-09	0.0263897
donor6_2.GGTAGAAGACCGCCTG.1	3	3.94577e-09	2.57584e-08	6.03922e-09	2.04938e-08	0.0160397	0.856494	0.0256649	0.101801	3.66472e-09	7.91188e-08
donor6_2.GTAACTGCCCAAGGAG.1	3	0.0174537	1.30727e-10	3.98339e-10	4.51809e-10	1.62116e-10	0.963753	7.21027e-09	0.0187934	3.53783e-10	6.62546e-10
donor6_2.GTCCATTACTGCTACG.1	3	0.00621474	5.27051e-10	1.17978e-09	0.0561395	8.28638e-10	0.646007	0.0618614	0.185377	1.23147e-09	0.0444008
donor6_2.GTGCCTGAGACCAAAC.1	3	1.38861e-07	7.4477e-08	1.40542e-07	4.46095e-07	1.75773e-07	0.943714	2.87871e-06	0.0562817	8.81798e-08	5.19097e-07
donor6_2.GTTAACATCACTTAAA.1	3	3.39998e-08	4.23693e-08	6.86273e-08	8.20178e-08	1.03903e-07	0.990544	0.00442574	0.00231496	4.55239e-08	0.00271509
donor6_2.TACAAGTCTCGTGCAT.1	3	2.9006e-09	2.26951e-09	8.47382e-08	2.51329e-09	6.61201e-09	0.771249	0.0516908	0.17706	2.16411e-09	3.29948e-09
donor6_2.TCCCGTGTGCAATTTG.1	3	1.71642e-08	0.00964615	0.0476391	0.0207555	4.68939e-08	0.665098	0.0942681	0.162593	2.46937e-08	1.31705e-07
donor6_2.TGAGCCATACAGTCTC.1	3	5.35607e-08	9.42017e-08	1.21123e-07	1.02801e-07	8.84607e-08	0.883247	0.0111586	0.105593	7.28613e-08	1.78456e-07
donor6_2.TGTCCACGGCTCAACT.1	3	6.55872e-09	6.01897e-09	7.06316e-09	0.0121937	4.9111e-09	0.875544	3.5995e-08	0.108711	0.00355109	9.53483e-09
donor6_2.TTGACATGAACGTGGA.1	3	2.88193e-10	0.0533008	1.78872e-09	0.00632637	4.18054e-10	0.376063	0.176418	0.387892	7.09848e-10	6.56594e-09
donor6_3.AACATATCAACTGGTG.1	3	0.00834422	1.37217e-09	0.00759889	0.00429936	0.0376505	0.839952	0.0815576	0.00573746	1.35408e-09	0.0148603
donor6_3.AAGCCGAAGCGGTTTA.1	3	6.62347e-08	1.28198e-08	1.98662e-08	0.0324457	1.59469e-08	0.877481	8.6301e-08	0.0854227	1.94561e-08	0.00465015
[truncated: 217 more rows]

## Sheet: nodule_avg
cluster	adipocytes	endothelial cells	fibroblasts	monocytes	MSchwann cells	neurons	NMSchwann cells	SGC	mural cells	T-cells
[truncated: 5 more rows]
